# Supplementary material for: The metabolite-controlled ubiquitin conjugase Ubc8 promotes mitochondrial protein import
Source: PubMed Central journal article supplement (PMC9579816; doi:10.26508/lsa.202201526), 2022-10-17
Supplement: LSA-2022-01526_SdataF3.1.pdf [file LSA-2022-01526_SdataF3.1.pdf]

Source Data for Figure 3\_Roedl et al.

Fig.3A

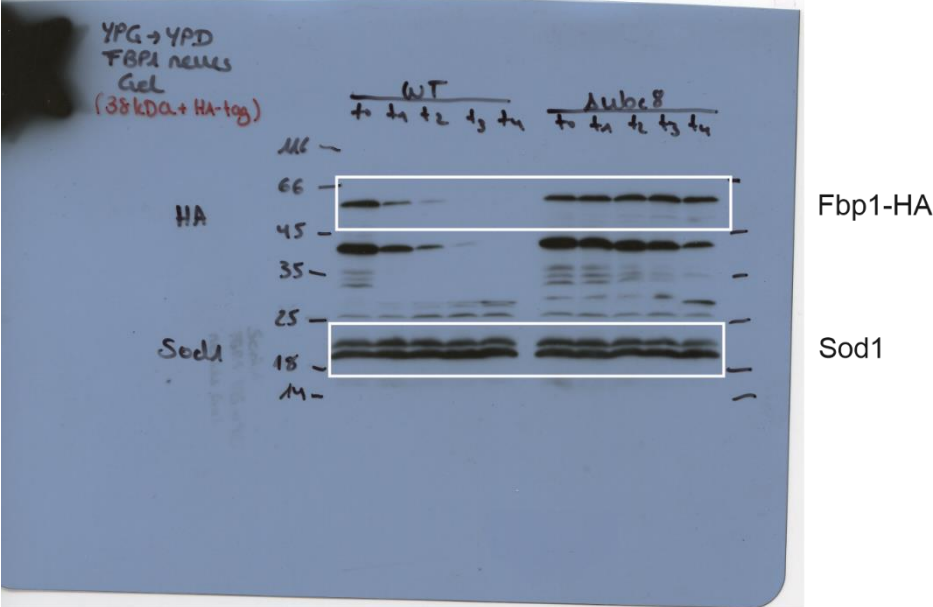

Fig.3B

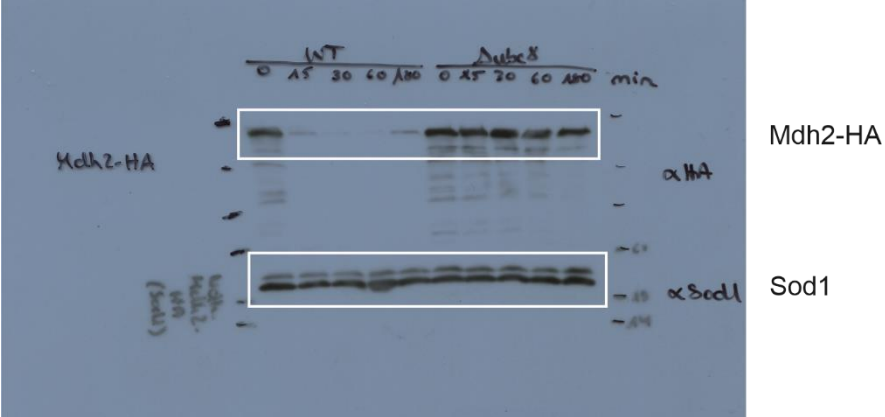

Fig.3C

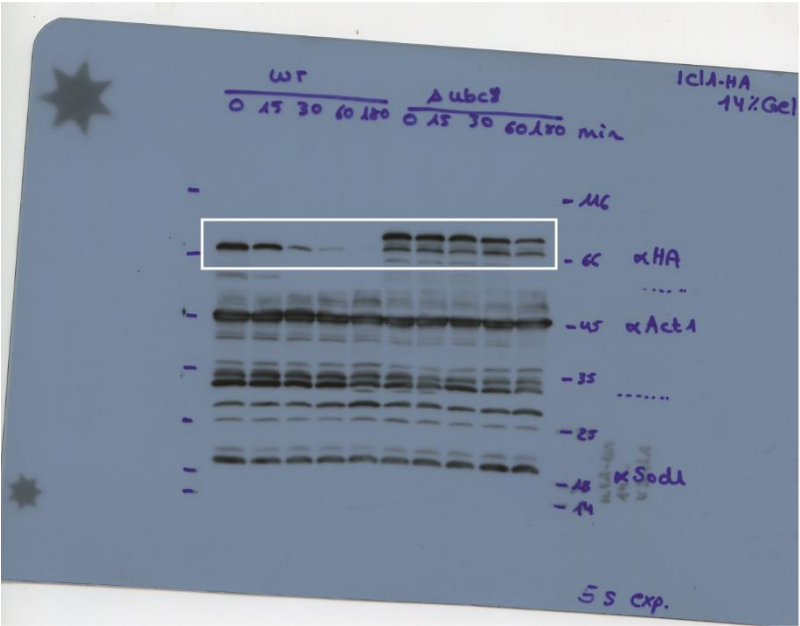

Icl1-HA

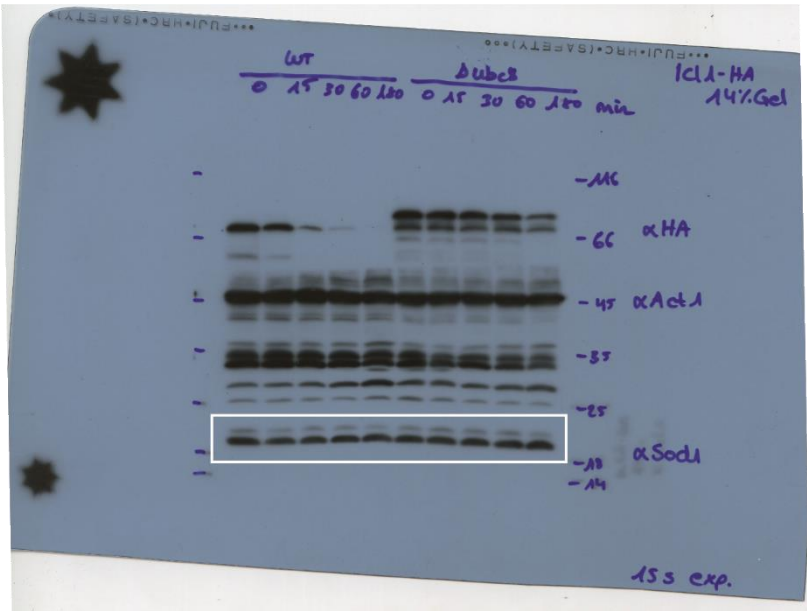

Sod1

Fig.3D

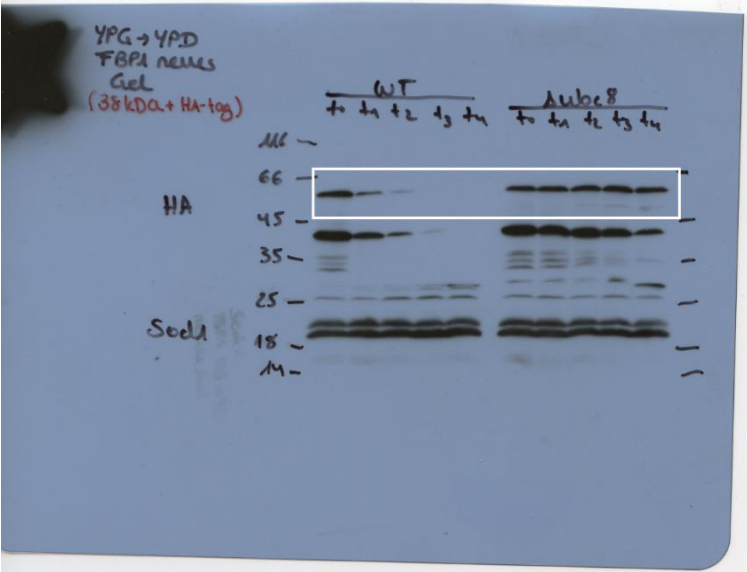

Fbp1-HA

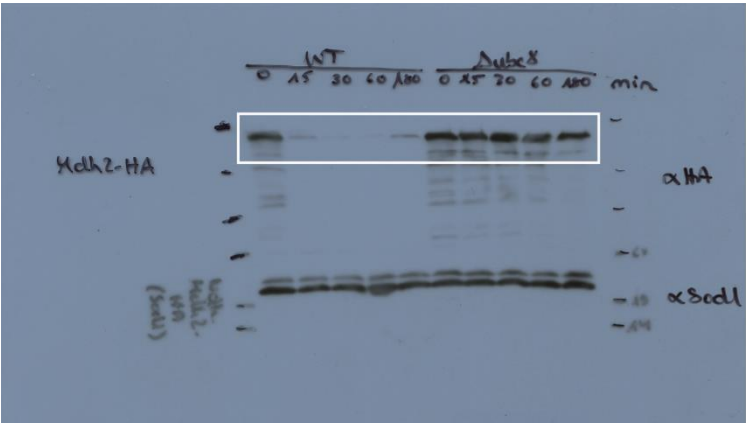

Mdh2-HA

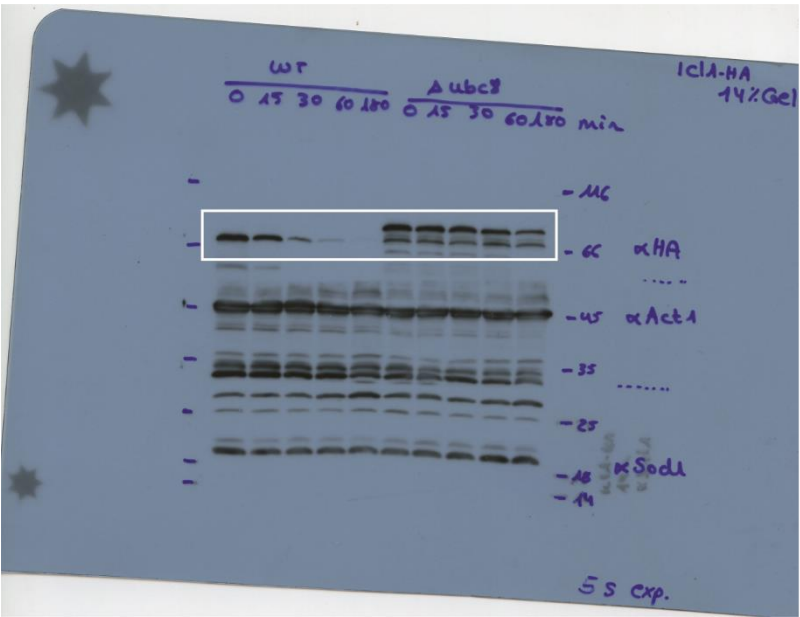

Icl1-HA
