# Supplementary material for: The metabolite-controlled ubiquitin conjugase Ubc8 promotes mitochondrial protein import
Source: PubMed Central journal article supplement (PMC9579816; doi:10.26508/lsa.202201526), 2022-10-17

**Fig.4A**

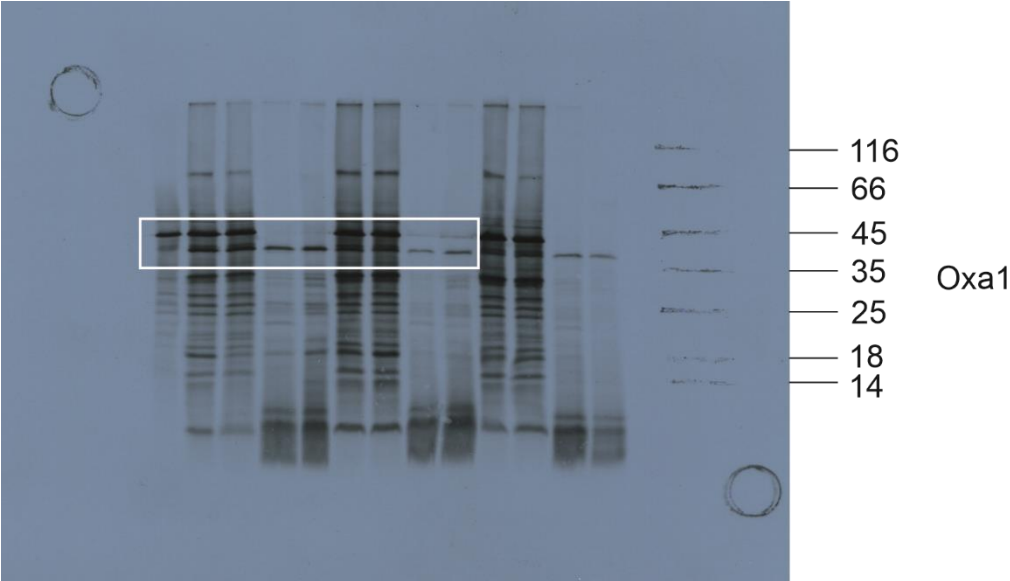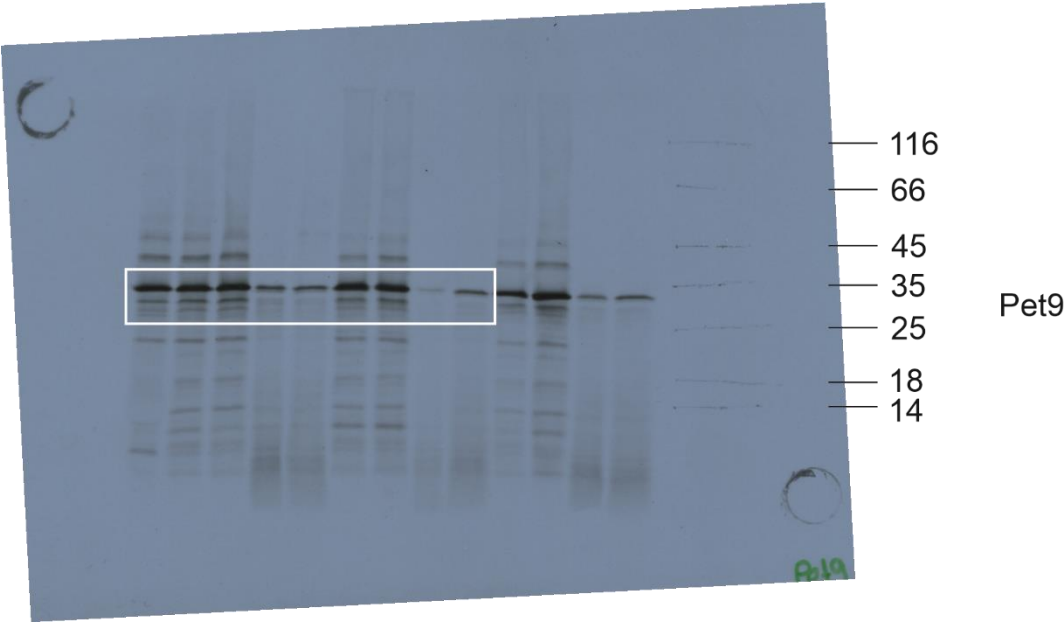

Fig.4C

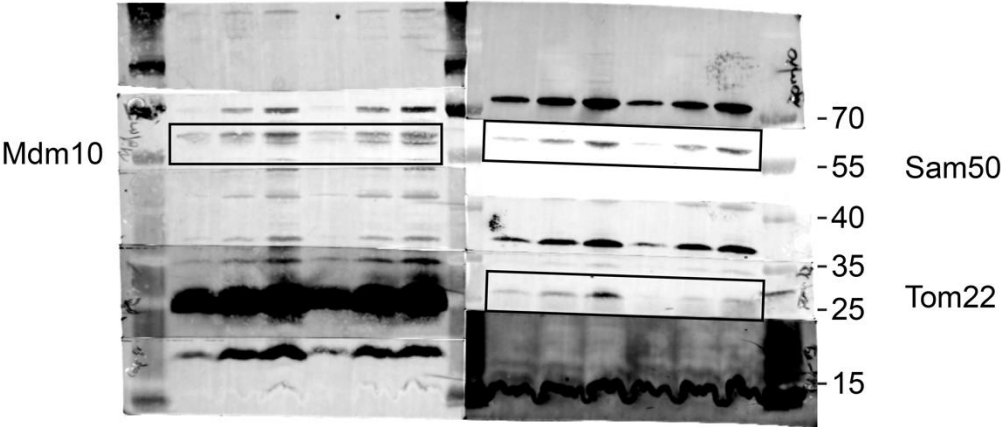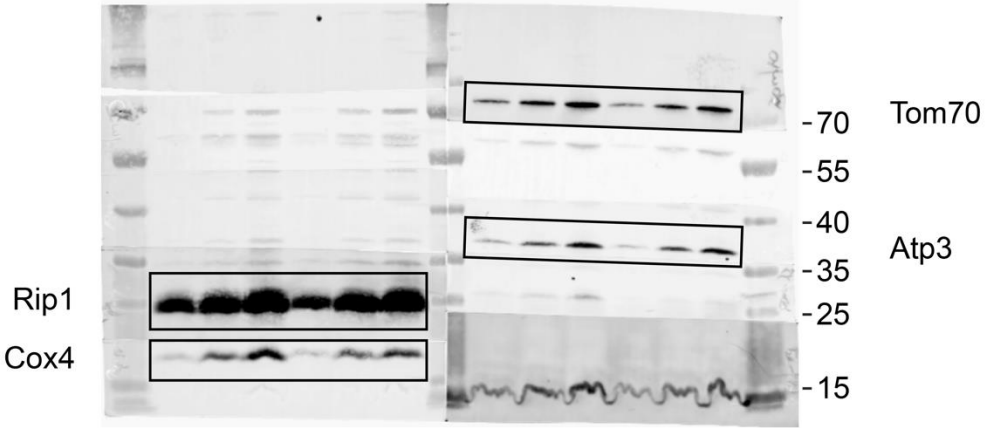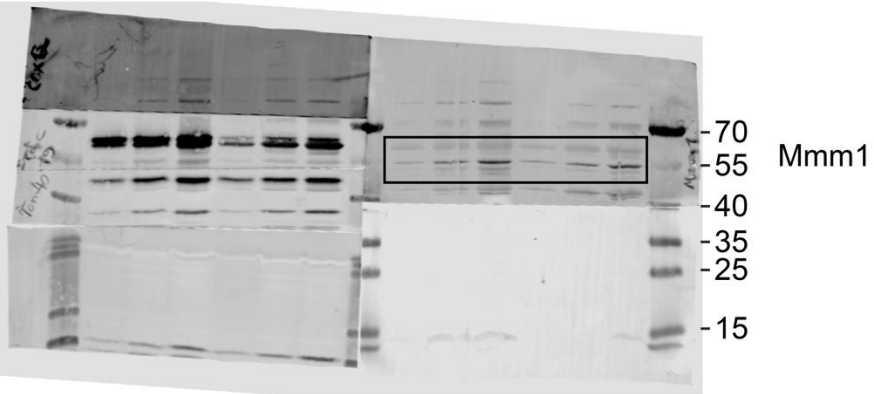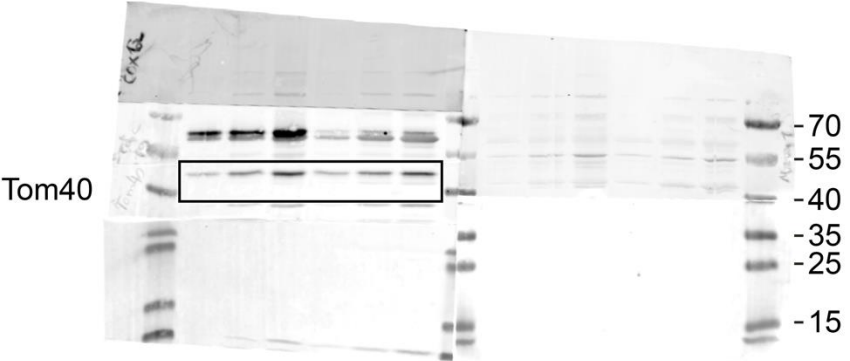

Fig.4D

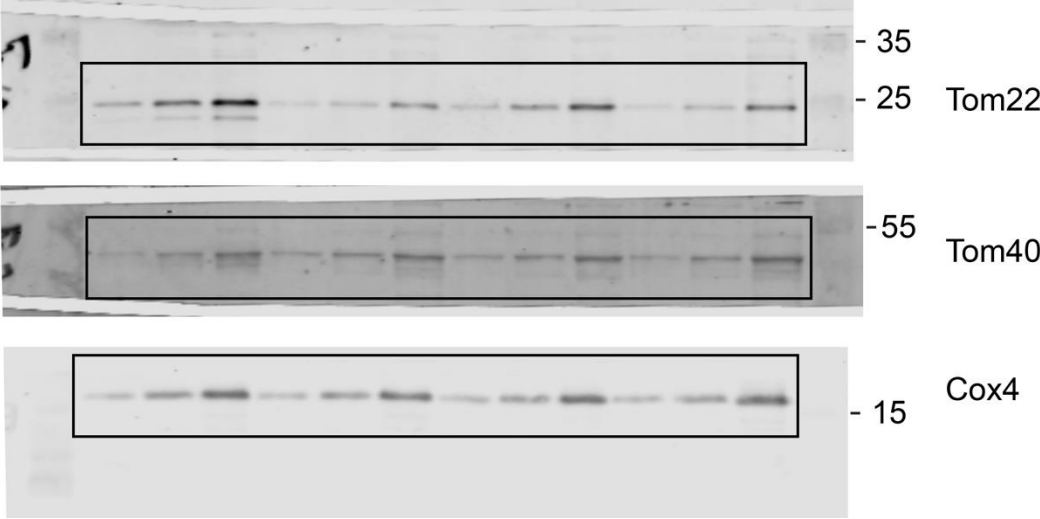

Supplement: LSA-2022-01526_SdataF4.1.pdf [file LSA-2022-01526_SdataF4.1.pdf]
