# Supplementary material for: The metabolite-controlled ubiquitin conjugase Ubc8 promotes mitochondrial protein import
Source: PubMed Central journal article supplement (PMC9579816; doi:10.26508/lsa.202201526), 2022-10-17

Fig.5A

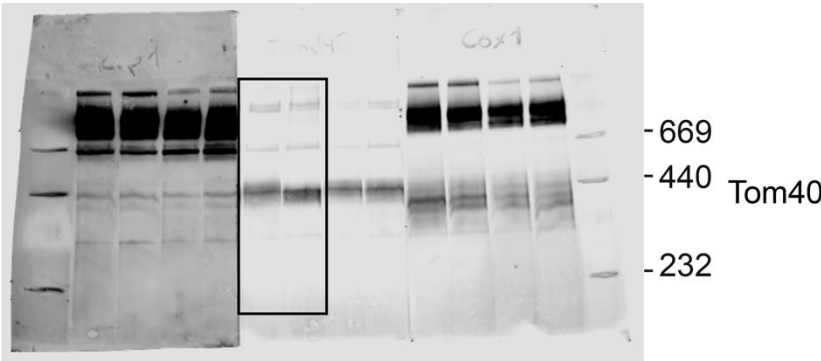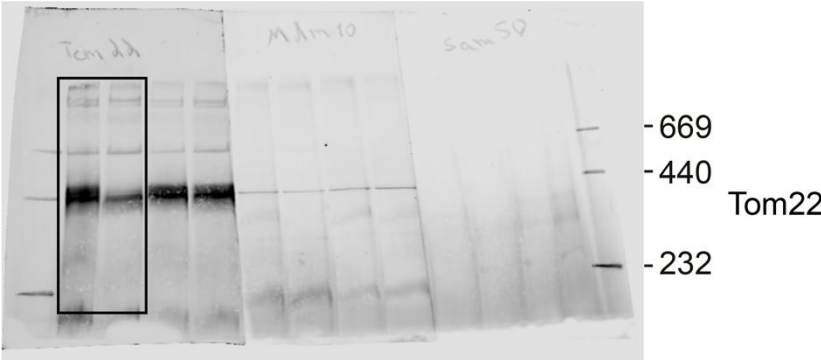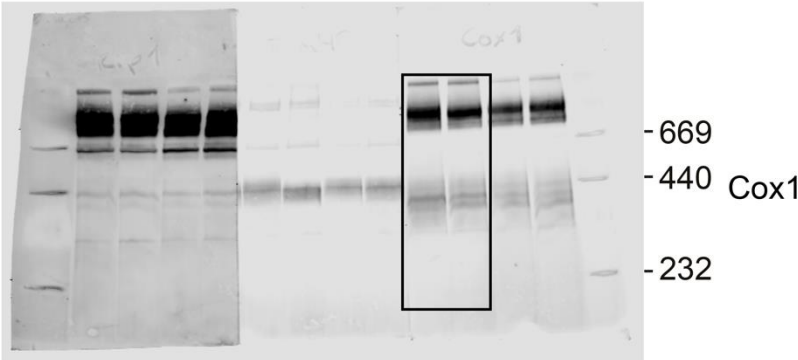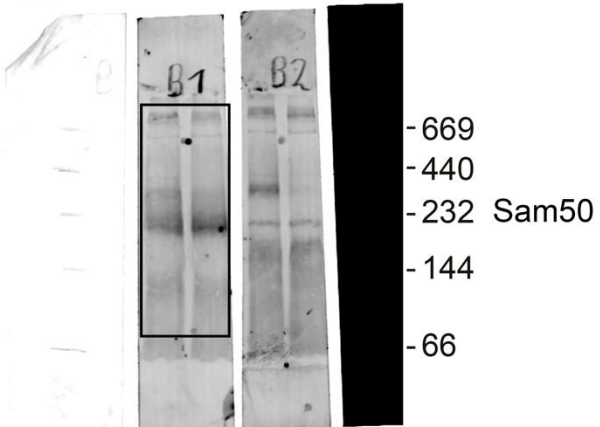

**Fig.5B**

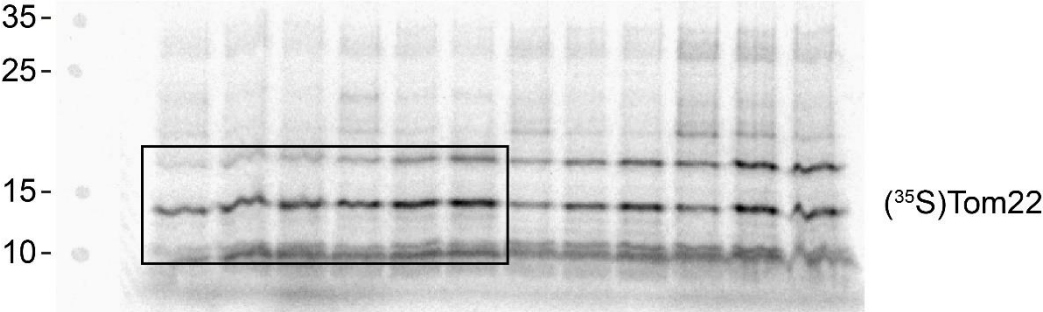

**Fig.5D**

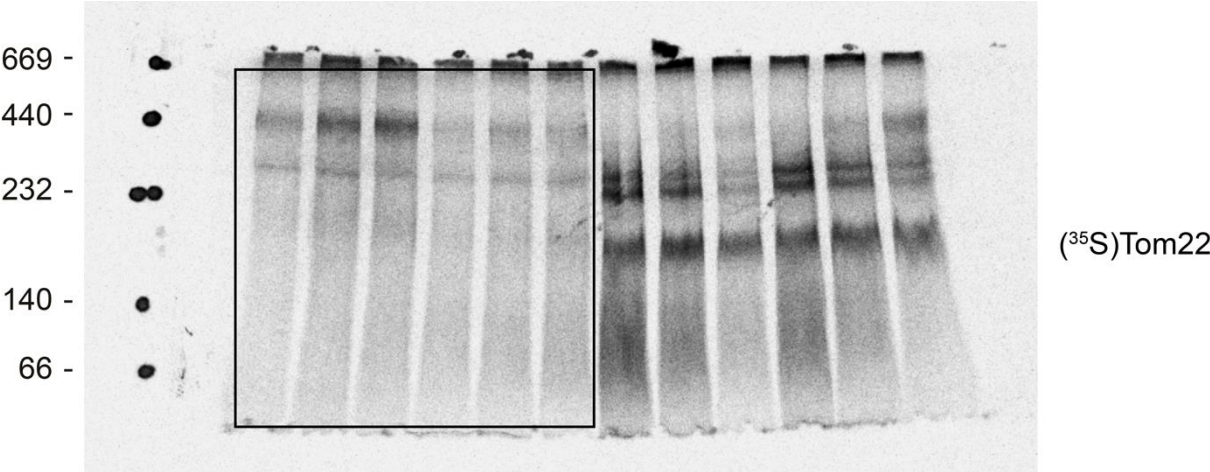

Supplement: LSA-2022-01526_SdataF5.pdf [file LSA-2022-01526_SdataF5.pdf]
