# Supplementary material for: The metabolite-controlled ubiquitin conjugase Ubc8 promotes mitochondrial protein import
Source: PubMed Central journal article supplement (PMC9579816; doi:10.26508/lsa.202201526), 2022-10-17

Source Data for Figure S2\_Roedl et al.

**Fig.S2A**

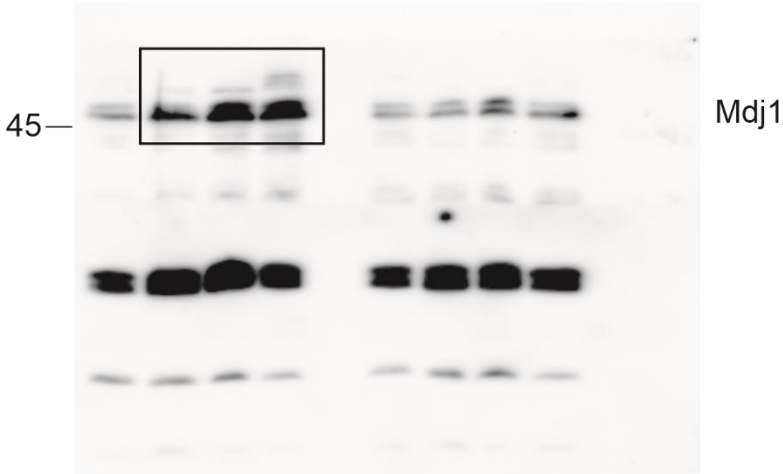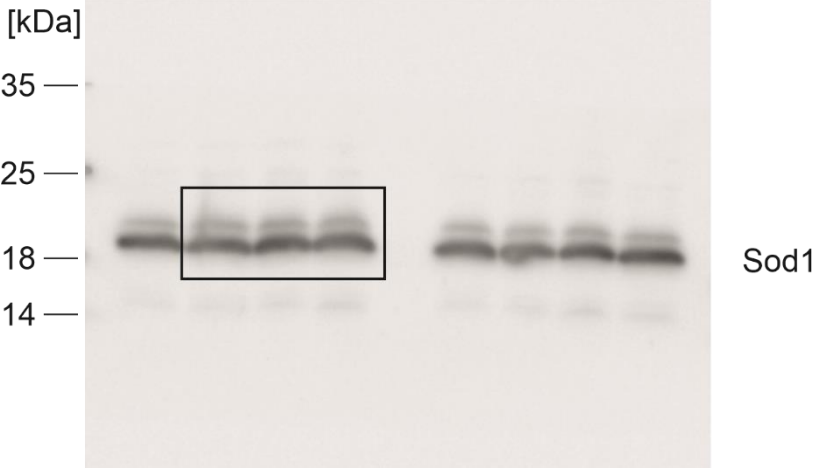

Fig.S2C

Glucose

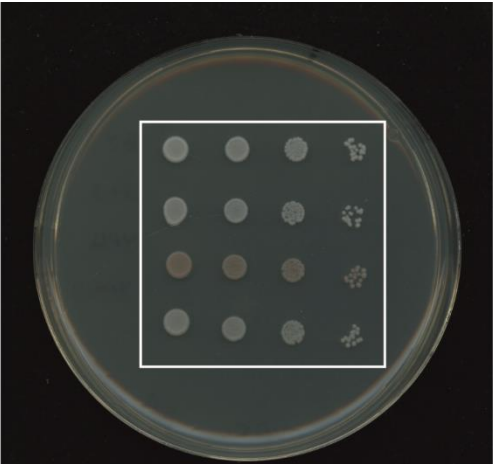

Glycerol

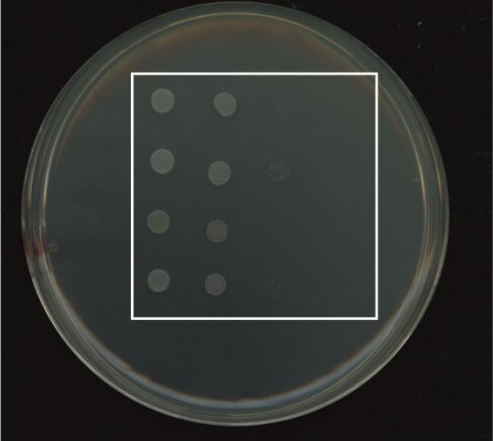

Fig.S2D

WT

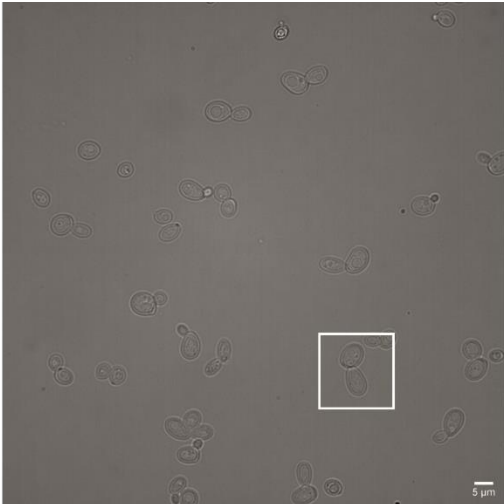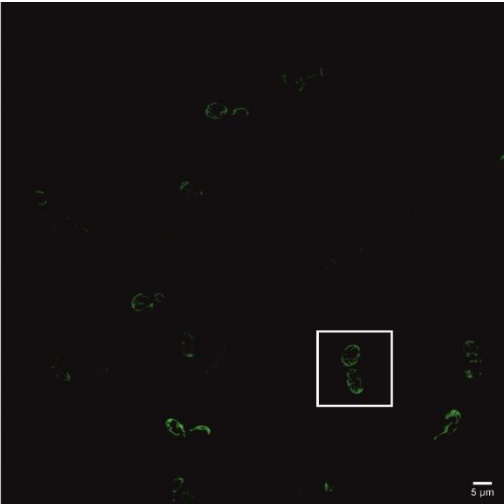

$\Delta ubc8$

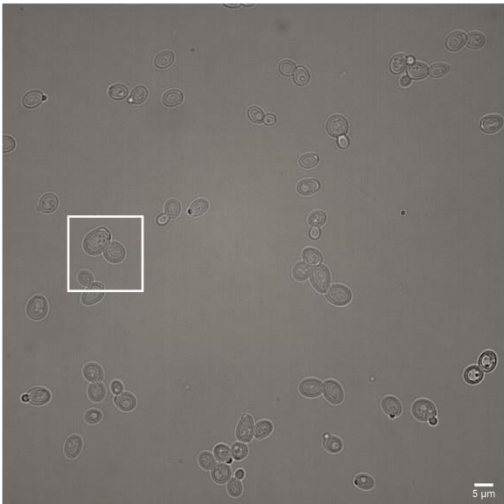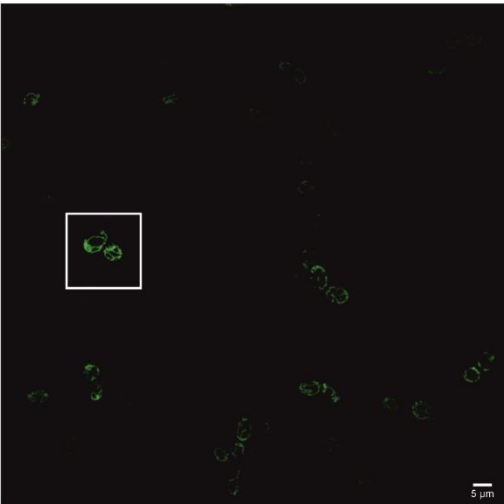

$\Delta mdm12$

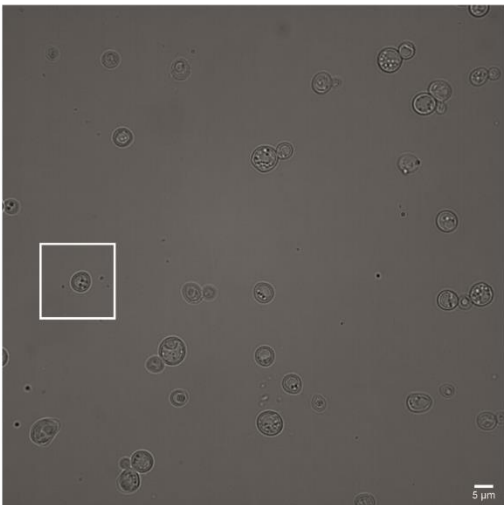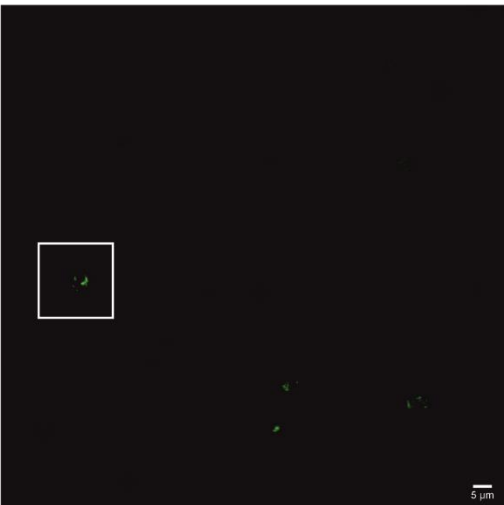

Supplement: LSA-2022-01526_SdataFS2.pdf [file LSA-2022-01526_SdataFS2.pdf]
