# Supplementary material for: The metabolite-controlled ubiquitin conjugase Ubc8 promotes mitochondrial protein import
Source: PubMed Central journal article supplement (PMC9579816; doi:10.26508/lsa.202201526), 2022-10-17

Source Data for Figure S5\_Roedl et al.

**Fig.S5C**

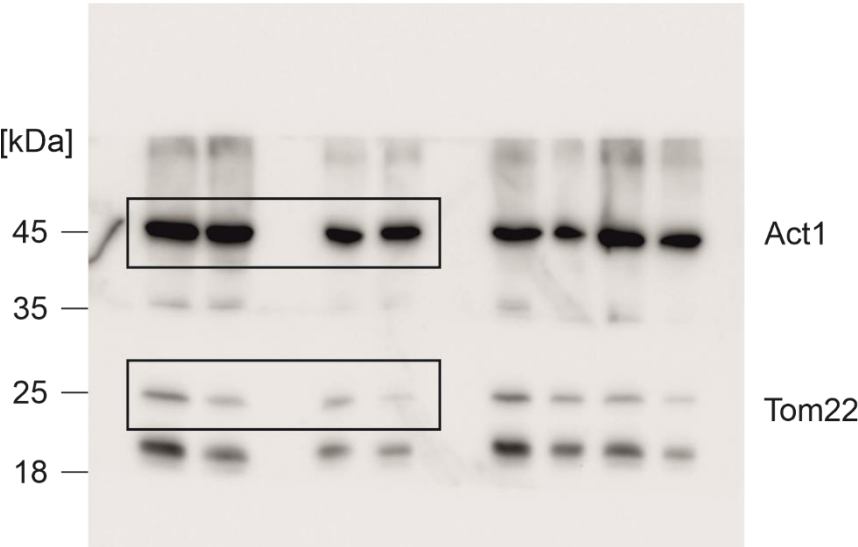

**Fig.S5D**

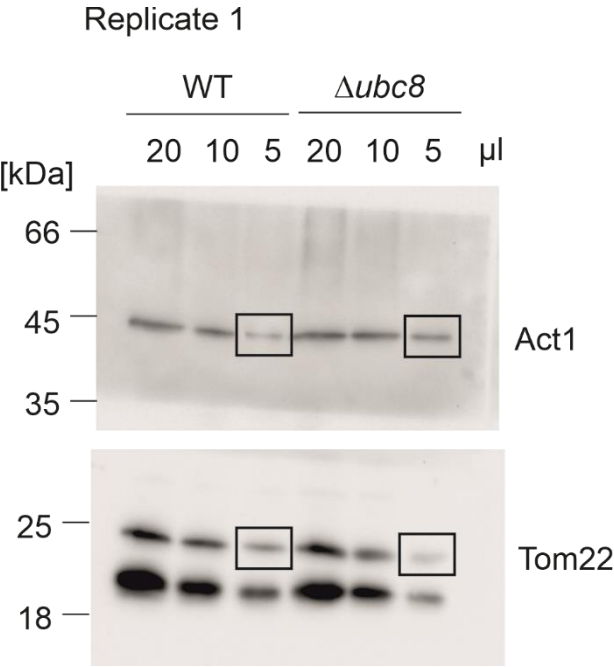

Replicate 2

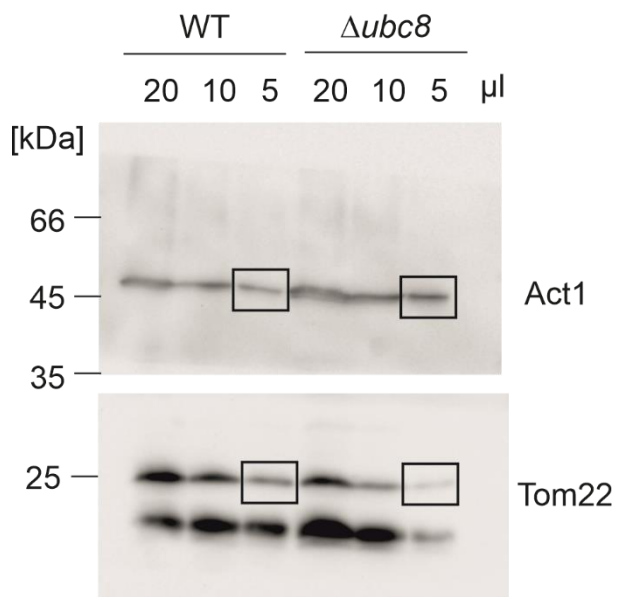

Replicate 3

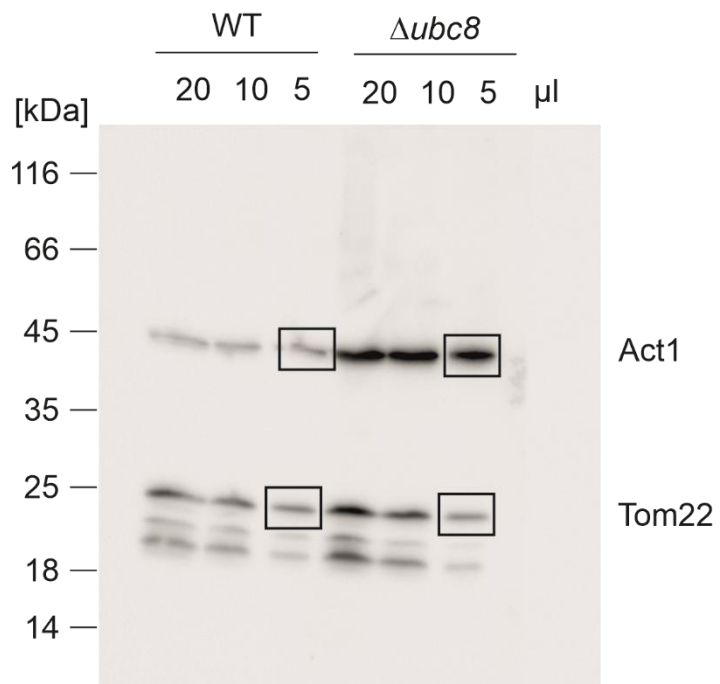

Supplement: LSA-2022-01526_SdataFS5.pdf [file LSA-2022-01526_SdataFS5.pdf]
