# Supplementary material for: The metabolite-controlled ubiquitin conjugase Ubc8 promotes mitochondrial protein import
Source: PubMed Central journal article supplement (PMC9579816; doi:10.26508/lsa.202201526), 2022-10-17

**Fig.S6B**

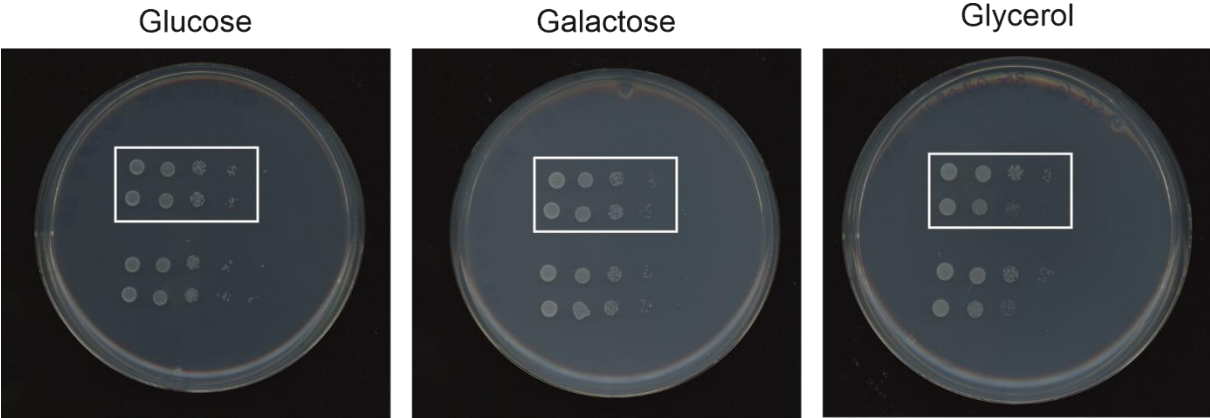

**Fig.S6C**

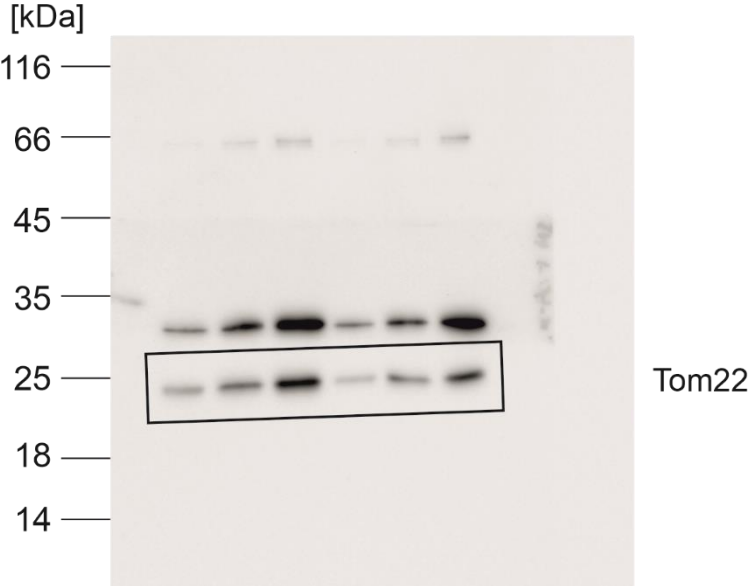

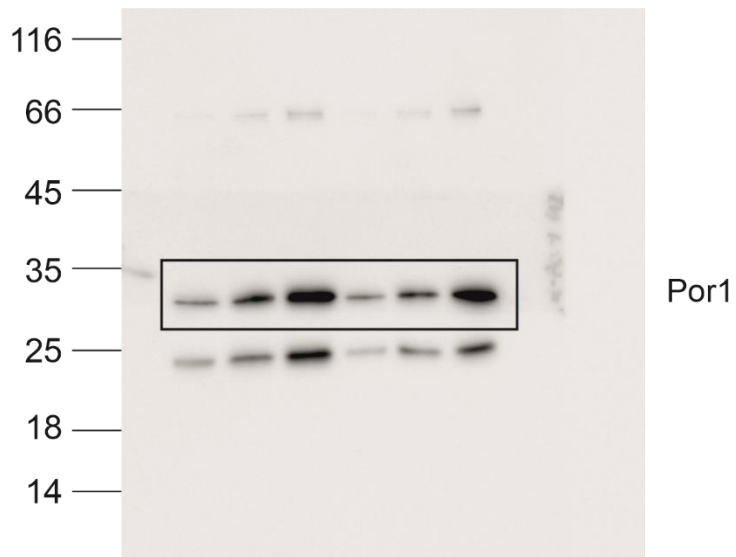

**Fig.S6D**

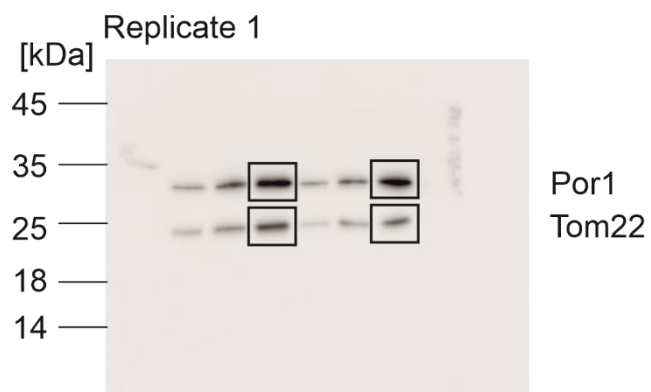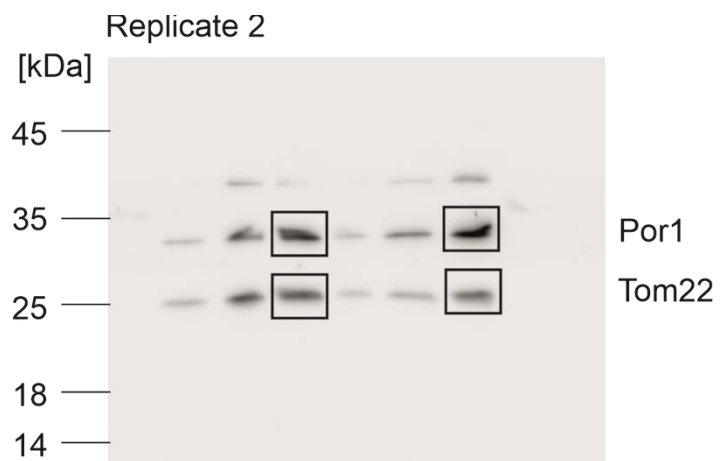

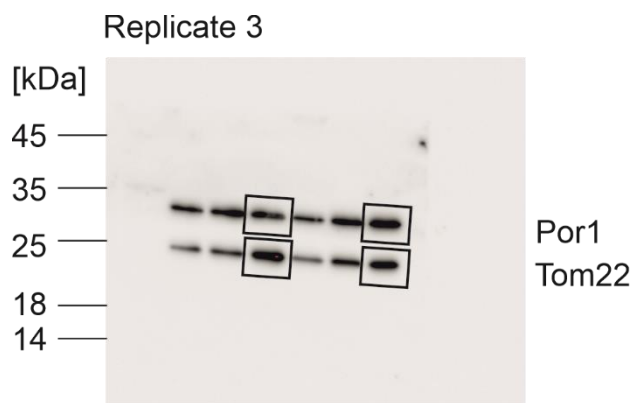

Fig.S6E

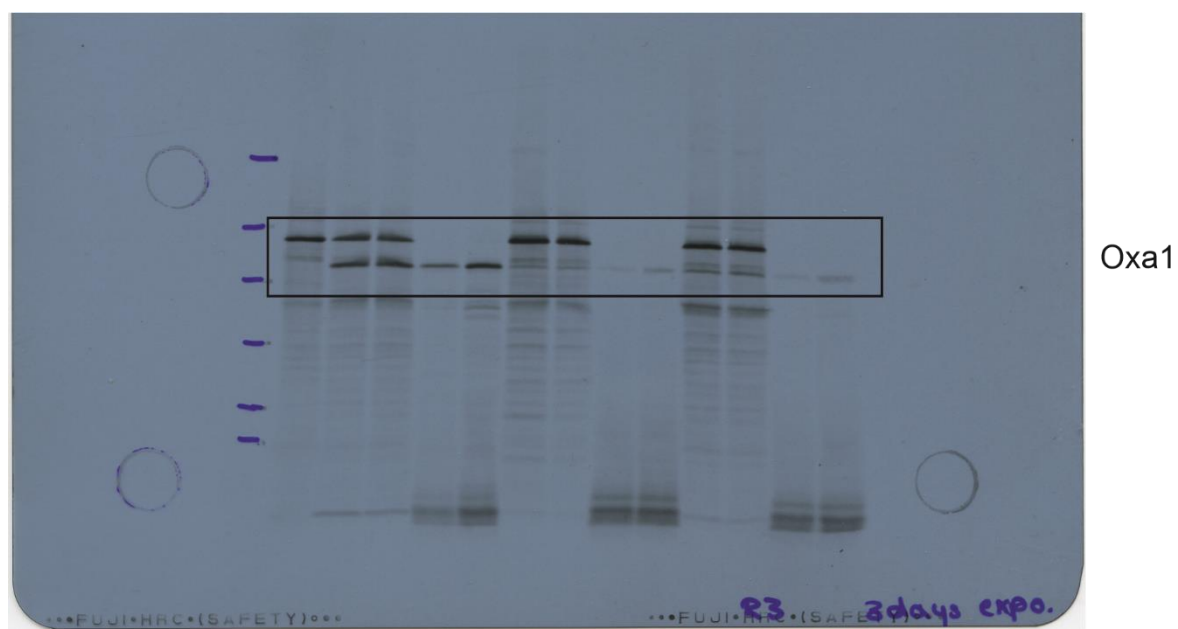

Supplement: LSA-2022-01526_SdataFS6.2.pdf [file LSA-2022-01526_SdataFS6.2.pdf]
