# Supplementary material for: The metabolite-controlled ubiquitin conjugase Ubc8 promotes mitochondrial protein import
Source: Life Sci Alliance. 2022 Oct 17;6(1):e202201526. doi: 10.26508/lsa.202201526 (PMC9579816; doi:10.26508/lsa.202201526)
Supplement: Supplementary file 2 [file LSA-2022-01526_SdataF1_FS1.xlsx]

## Sheet: Plate map for Grwoth Curve
Well	Strain	Medium
A1	WT empty vector	SD-His
A2	WT empty vector	SD-His
A3	WT empty vector	SD-His
A4	WT DN-Oxa1-Ura3	SD-His
A5	WT DN-Oxa1-Ura3	SD-His
A6	WT DN-Oxa1-Ura3	SD-His
A7	WT Oxa1-Ura3	SD-His
A8	WT Oxa1-Ura3	SD-His
A9	WT Oxa1-Ura3	SD-His
A10	Dubc8 empty vector	SD-His
A11	Dubc8 empty vector	SD-His
A12	Dubc8 empty vector	SD-His
B1	WT empty vector	SD-Ura
B2	WT empty vector	SD-Ura
B3	WT empty vector	SD-Ura
B4	WT DN-Oxa1-Ura3	SD-Ura
B5	WT DN-Oxa1-Ura3	SD-Ura
B6	WT DN-Oxa1-Ura3	SD-Ura
B7	WT Oxa1-Ura3	SD-Ura
B8	WT Oxa1-Ura3	SD-Ura
B9	WT Oxa1-Ura3	SD-Ura
B10	Dubc8 empty vector	SD-Ura
B11	Dubc8 empty vector	SD-Ura
B12	Dubc8 empty vector	SD-Ura
C1	Dubc8 DN-Oxa1-Ura3	SD-His
C2	Dubc8 DN-Oxa1-Ura3	SD-His
C3	Dubc8 DN-Oxa1-Ura3	SD-His
C4	Dubc8 Oxa1-Ura3	SD-His
C5	Dubc8 Oxa1-Ura3	SD-His
C6	Dubc8 Oxa1-Ura3	SD-His
D1	Dubc8 DN-Oxa1-Ura3	SD-Ura
D2	Dubc8 DN-Oxa1-Ura3	SD-Ura
D3	Dubc8 DN-Oxa1-Ura3	SD-Ura
D4	Dubc8 Oxa1-Ura3	SD-Ura
D5	Dubc8 Oxa1-Ura3	SD-Ura
D6	Dubc8 Oxa1-Ura3	SD-Ura

## Sheet: Growth Curve Fig.1C, S1C
Time	Temp	A1	A2	A3	A4	A5	A6	A7	A8	A9	A10	A11	A12	B1	B2	B3	B4	B5	B6	B7	B8	B9	B10	B11	B12	C1	C2	C3	C4	C5	C6	C7	C8	C9	C10	C11	C12	D1	D2	D3	D4	D5	D6	D7	D8	D9	D10	D11	D12
00:00:00	30	0.101	0.102	0.103	0.104	0.104	0.104	0.099	0.1	0.099	0.1	0.102	0.1	0.103	0.101	0.106	0.102	0.1	0.108	0.103	0.098	0.098	0.101	0.104	0.103	0.1	0.101	0.117	0.099	0.101	0.098	0.104	0.102	0.104	0.101	0.104	0.103	0.102	0.101	0.102	0.097	0.097	0.098	0.103	0.105	0.103	0.105	0.137	0.105
00:10:00	29.9	0.101	0.101	0.102	0.104	0.105	0.105	0.097	0.1	0.099	0.1	0.102	0.099	0.103	0.101	0.105	0.102	0.1	0.108	0.103	0.098	0.098	0.101	0.104	0.103	0.099	0.101	0.118	0.098	0.1	0.097	0.104	0.102	0.104	0.101	0.104	0.103	0.102	0.102	0.101	0.097	0.097	0.098	0.103	0.105	0.103	0.105	0.137	0.104
00:20:00	30	0.102	0.101	0.103	0.105	0.105	0.105	0.097	0.101	0.1	0.101	0.102	0.099	0.103	0.101	0.105	0.102	0.1	0.108	0.103	0.098	0.098	0.101	0.104	0.103	0.099	0.101	0.12	0.098	0.101	0.097	0.103	0.102	0.104	0.101	0.104	0.103	0.102	0.101	0.101	0.097	0.098	0.098	0.103	0.105	0.103	0.105	0.137	0.104
00:30:00	30	0.102	0.102	0.103	0.105	0.105	0.105	0.097	0.101	0.1	0.1	0.103	0.1	0.103	0.101	0.105	0.102	0.1	0.108	0.103	0.098	0.098	0.101	0.105	0.103	0.099	0.101	0.122	0.099	0.101	0.097	0.103	0.102	0.104	0.101	0.104	0.103	0.102	0.101	0.102	0.097	0.097	0.098	0.103	0.105	0.103	0.105	0.137	0.104
00:40:00	30	0.103	0.102	0.104	0.106	0.106	0.106	0.098	0.101	0.101	0.1	0.103	0.1	0.103	0.101	0.105	0.102	0.1	0.109	0.103	0.098	0.098	0.101	0.105	0.103	0.1	0.101	0.123	0.099	0.101	0.097	0.103	0.102	0.103	0.101	0.104	0.103	0.102	0.101	0.102	0.097	0.097	0.098	0.103	0.105	0.103	0.105	0.137	0.104
00:50:00	30.1	0.103	0.102	0.104	0.106	0.106	0.106	0.098	0.101	0.101	0.101	0.103	0.101	0.103	0.101	0.105	0.103	0.1	0.109	0.103	0.098	0.098	0.101	0.105	0.104	0.1	0.101	0.126	0.099	0.101	0.097	0.103	0.101	0.103	0.101	0.104	0.102	0.102	0.103	0.102	0.097	0.098	0.098	0.103	0.105	0.103	0.105	0.137	0.104
01:00:00	30.2	0.103	0.103	0.105	0.106	0.107	0.107	0.098	0.101	0.101	0.101	0.103	0.101	0.103	0.102	0.105	0.102	0.101	0.109	0.103	0.098	0.098	0.101	0.105	0.104	0.1	0.101	0.127	0.099	0.101	0.097	0.103	0.101	0.103	0.101	0.104	0.103	0.102	0.101	0.102	0.097	0.098	0.098	0.103	0.105	0.103	0.105	0.137	0.104
01:10:00	30.3	0.104	0.103	0.105	0.107	0.107	0.107	0.098	0.102	0.101	0.101	0.104	0.101	0.103	0.101	0.105	0.102	0.101	0.109	0.103	0.098	0.099	0.101	0.105	0.105	0.1	0.101	0.129	0.099	0.101	0.097	0.103	0.101	0.103	0.101	0.104	0.102	0.102	0.101	0.102	0.097	0.097	0.098	0.103	0.105	0.103	0.105	0.137	0.104
01:20:00	30.4	0.105	0.104	0.106	0.107	0.108	0.108	0.098	0.102	0.101	0.102	0.104	0.102	0.104	0.101	0.105	0.102	0.101	0.109	0.103	0.098	0.099	0.101	0.105	0.104	0.1	0.101	0.131	0.099	0.102	0.098	0.103	0.101	0.103	0.101	0.104	0.102	0.103	0.103	0.102	0.097	0.098	0.098	0.103	0.105	0.103	0.105	0.137	0.104
01:30:00	30.4	0.106	0.105	0.107	0.108	0.109	0.108	0.099	0.103	0.102	0.102	0.104	0.102	0.104	0.102	0.105	0.103	0.101	0.11	0.103	0.098	0.099	0.102	0.105	0.106	0.101	0.103	0.133	0.099	0.102	0.098	0.103	0.101	0.103	0.101	0.104	0.102	0.103	0.103	0.102	0.098	0.097	0.098	0.103	0.105	0.103	0.105	0.137	0.104
01:40:00	30.4	0.107	0.105	0.108	0.109	0.11	0.109	0.099	0.103	0.102	0.103	0.105	0.103	0.104	0.102	0.105	0.103	0.102	0.112	0.104	0.098	0.099	0.102	0.105	0.105	0.101	0.105	0.135	0.099	0.102	0.098	0.103	0.101	0.103	0.101	0.104	0.102	0.103	0.102	0.102	0.097	0.098	0.098	0.103	0.105	0.103	0.105	0.137	0.104
01:50:00	30.5	0.108	0.106	0.109	0.11	0.111	0.11	0.099	0.104	0.102	0.103	0.105	0.103	0.104	0.102	0.105	0.103	0.102	0.11	0.103	0.098	0.099	0.102	0.105	0.105	0.101	0.102	0.138	0.1	0.102	0.098	0.103	0.101	0.103	0.101	0.104	0.102	0.103	0.103	0.102	0.097	0.098	0.099	0.103	0.105	0.103	0.105	0.137	0.104
02:00:00	30.5	0.109	0.107	0.11	0.11	0.112	0.111	0.1	0.104	0.103	0.104	0.105	0.103	0.104	0.102	0.105	0.104	0.102	0.11	0.103	0.098	0.099	0.102	0.106	0.105	0.102	0.103	0.141	0.1	0.102	0.099	0.103	0.101	0.103	0.101	0.104	0.102	0.104	0.105	0.102	0.098	0.098	0.099	0.103	0.105	0.103	0.105	0.137	0.104
02:10:00	30.5	0.11	0.108	0.111	0.111	0.113	0.112	0.1	0.105	0.103	0.104	0.106	0.104	0.104	0.102	0.105	0.104	0.102	0.11	0.103	0.098	0.099	0.102	0.105	0.105	0.102	0.103	0.143	0.1	0.103	0.099	0.103	0.101	0.103	0.101	0.104	0.102	0.104	0.103	0.103	0.098	0.098	0.099	0.103	0.105	0.103	0.105	0.137	0.104
02:20:00	30.5	0.111	0.109	0.113	0.112	0.115	0.113	0.101	0.106	0.103	0.105	0.106	0.105	0.104	0.102	0.105	0.104	0.103	0.11	0.104	0.099	0.099	0.102	0.106	0.105	0.102	0.103	0.146	0.1	0.103	0.099	0.103	0.101	0.103	0.101	0.104	0.102	0.105	0.103	0.103	0.098	0.099	0.099	0.103	0.105	0.103	0.105	0.137	0.104
02:30:00	30.5	0.112	0.11	0.114	0.114	0.116	0.114	0.101	0.107	0.104	0.106	0.107	0.105	0.104	0.102	0.106	0.104	0.103	0.111	0.104	0.099	0.099	0.102	0.106	0.105	0.103	0.104	0.149	0.101	0.103	0.099	0.103	0.101	0.103	0.101	0.104	0.102	0.105	0.103	0.103	0.097	0.098	0.099	0.103	0.105	0.103	0.105	0.137	0.104
02:40:00	30.5	0.114	0.111	0.116	0.115	0.118	0.115	0.102	0.108	0.104	0.107	0.108	0.106	0.104	0.102	0.108	0.104	0.103	0.111	0.104	0.098	0.099	0.102	0.106	0.105	0.103	0.104	0.152	0.101	0.103	0.1	0.103	0.101	0.103	0.101	0.104	0.102	0.105	0.103	0.103	0.098	0.098	0.099	0.103	0.105	0.103	0.105	0.137	0.104
02:50:00	30.5	0.115	0.112	0.117	0.116	0.12	0.116	0.102	0.109	0.105	0.107	0.108	0.107	0.104	0.103	0.107	0.105	0.103	0.111	0.104	0.099	0.099	0.102	0.106	0.106	0.104	0.105	0.155	0.101	0.104	0.1	0.103	0.101	0.103	0.101	0.104	0.102	0.105	0.102	0.104	0.098	0.098	0.099	0.103	0.105	0.103	0.105	0.137	0.104
03:00:00	30.5	0.116	0.114	0.119	0.117	0.121	0.118	0.103	0.11	0.106	0.108	0.109	0.107	0.105	0.103	0.108	0.105	0.104	0.111	0.104	0.098	0.099	0.102	0.106	0.105	0.104	0.105	0.158	0.101	0.104	0.1	0.103	0.101	0.103	0.101	0.104	0.102	0.106	0.103	0.104	0.098	0.098	0.099	0.103	0.105	0.103	0.105	0.137	0.104
03:10:00	30.5	0.118	0.115	0.12	0.119	0.123	0.119	0.103	0.111	0.106	0.109	0.11	0.108	0.105	0.103	0.108	0.106	0.104	0.112	0.104	0.099	0.099	0.102	0.106	0.105	0.105	0.106	0.162	0.102	0.104	0.1	0.103	0.101	0.103	0.101	0.104	0.102	0.106	0.103	0.104	0.098	0.098	0.099	0.103	0.105	0.103	0.105	0.137	0.104
03:20:00	30.5	0.12	0.116	0.122	0.12	0.125	0.121	0.104	0.112	0.107	0.11	0.111	0.109	0.105	0.103	0.108	0.106	0.105	0.112	0.108	0.099	0.099	0.102	0.107	0.106	0.105	0.106	0.165	0.102	0.105	0.101	0.103	0.101	0.103	0.101	0.104	0.102	0.106	0.103	0.104	0.098	0.098	0.099	0.103	0.105	0.103	0.105	0.137	0.104
03:30:00	30.5	0.121	0.118	0.124	0.122	0.127	0.123	0.105	0.113	0.108	0.111	0.112	0.11	0.105	0.103	0.108	0.107	0.105	0.113	0.104	0.099	0.1	0.102	0.106	0.106	0.106	0.107	0.169	0.103	0.105	0.101	0.103	0.101	0.103	0.101	0.104	0.102	0.107	0.104	0.104	0.098	0.098	0.099	0.103	0.105	0.103	0.105	0.137	0.106
03:40:00	30.5	0.123	0.119	0.126	0.124	0.129	0.125	0.105	0.114	0.108	0.112	0.113	0.111	0.105	0.103	0.108	0.107	0.106	0.113	0.104	0.099	0.1	0.102	0.106	0.105	0.107	0.108	0.173	0.103	0.106	0.101	0.103	0.101	0.103	0.101	0.104	0.102	0.107	0.104	0.104	0.098	0.098	0.099	0.103	0.105	0.103	0.105	0.137	0.106
03:50:00	30.5	0.125	0.121	0.128	0.126	0.13	0.127	0.106	0.116	0.109	0.113	0.115	0.113	0.105	0.103	0.108	0.107	0.106	0.113	0.104	0.099	0.1	0.103	0.107	0.105	0.107	0.108	0.179	0.103	0.106	0.102	0.103	0.101	0.103	0.101	0.104	0.102	0.107	0.103	0.105	0.098	0.099	0.099	0.103	0.105	0.103	0.105	0.137	0.106
04:00:00	30.5	0.127	0.123	0.13	0.127	0.133	0.129	0.107	0.117	0.11	0.115	0.116	0.114	0.105	0.104	0.108	0.108	0.106	0.117	0.104	0.099	0.1	0.103	0.107	0.107	0.108	0.109	0.185	0.104	0.107	0.102	0.103	0.101	0.103	0.101	0.104	0.102	0.108	0.105	0.105	0.099	0.098	0.099	0.103	0.105	0.103	0.105	0.137	0.106
04:10:00	30.5	0.128	0.124	0.133	0.13	0.134	0.131	0.108	0.119	0.111	0.116	0.118	0.115	0.106	0.104	0.108	0.108	0.107	0.114	0.104	0.099	0.1	0.103	0.106	0.106	0.109	0.11	0.19	0.104	0.107	0.103	0.103	0.101	0.103	0.101	0.104	0.102	0.108	0.105	0.105	0.099	0.1	0.099	0.103	0.105	0.103	0.105	0.137	0.106
04:20:00	30.4	0.131	0.127	0.135	0.132	0.138	0.133	0.109	0.12	0.112	0.117	0.119	0.116	0.105	0.104	0.108	0.108	0.107	0.114	0.105	0.099	0.1	0.103	0.107	0.106	0.11	0.116	0.196	0.105	0.108	0.103	0.103	0.101	0.103	0.101	0.104	0.102	0.109	0.106	0.105	0.098	0.099	0.1	0.103	0.105	0.103	0.105	0.137	0.106
04:30:00	30.4	0.133	0.128	0.137	0.134	0.142	0.135	0.111	0.121	0.113	0.119	0.12	0.118	0.106	0.104	0.109	0.109	0.108	0.115	0.105	0.1	0.1	0.103	0.107	0.106	0.111	0.112	0.199	0.105	0.109	0.104	0.103	0.101	0.103	0.101	0.104	0.102	0.109	0.105	0.106	0.098	0.1	0.1	0.103	0.105	0.103	0.105	0.137	0.106
04:40:00	30.4	0.136	0.131	0.14	0.136	0.143	0.139	0.112	0.123	0.115	0.12	0.123	0.119	0.106	0.104	0.108	0.11	0.108	0.115	0.106	0.1	0.1	0.103	0.107	0.106	0.112	0.113	0.206	0.106	0.11	0.105	0.103	0.101	0.103	0.101	0.104	0.102	0.11	0.106	0.106	0.099	0.099	0.1	0.103	0.105	0.103	0.105	0.137	0.106
04:50:00	30.4	0.138	0.133	0.143	0.138	0.148	0.141	0.113	0.126	0.116	0.122	0.125	0.121	0.106	0.104	0.109	0.11	0.109	0.116	0.105	0.1	0.1	0.103	0.107	0.106	0.113	0.114	0.211	0.106	0.111	0.106	0.103	0.101	0.103	0.101	0.104	0.102	0.11	0.106	0.106	0.099	0.099	0.1	0.103	0.105	0.103	0.105	0.137	0.106
05:00:00	30.4	0.141	0.135	0.146	0.141	0.15	0.145	0.115	0.132	0.117	0.124	0.126	0.123	0.106	0.104	0.108	0.11	0.11	0.116	0.105	0.1	0.1	0.103	0.107	0.106	0.114	0.115	0.221	0.107	0.112	0.107	0.103	0.101	0.103	0.101	0.104	0.102	0.11	0.106	0.106	0.099	0.099	0.1	0.103	0.105	0.103	0.105	0.137	0.106
05:10:00	30.4	0.144	0.138	0.148	0.143	0.163	0.146	0.117	0.133	0.118	0.126	0.128	0.125	0.106	0.104	0.109	0.111	0.111	0.118	0.105	0.1	0.101	0.103	0.107	0.106	0.115	0.116	0.228	0.108	0.113	0.107	0.103	0.101	0.103	0.101	0.104	0.102	0.111	0.106	0.107	0.099	0.099	0.1	0.103	0.105	0.103	0.105	0.137	0.106
05:20:00	30.4	0.148	0.14	0.152	0.146	0.173	0.152	0.118	0.136	0.12	0.128	0.13	0.127	0.106	0.104	0.109	0.111	0.111	0.117	0.105	0.1	0.101	0.103	0.108	0.106	0.116	0.117	0.234	0.109	0.114	0.109	0.103	0.101	0.103	0.101	0.104	0.102	0.112	0.107	0.107	0.099	0.099	0.1	0.103	0.105	0.103	0.105	0.137	0.106
05:30:00	30.4	0.151	0.143	0.156	0.15	0.165	0.158	0.12	0.138	0.122	0.131	0.133	0.129	0.106	0.105	0.109	0.112	0.111	0.118	0.107	0.1	0.1	0.103	0.107	0.106	0.117	0.118	0.244	0.109	0.115	0.11	0.103	0.101	0.103	0.101	0.104	0.102	0.113	0.107	0.108	0.099	0.099	0.1	0.103	0.105	0.103	0.105	0.137	0.106
05:40:00	30.3	0.156	0.146	0.162	0.153	0.168	0.162	0.122	0.142	0.124	0.133	0.135	0.132	0.107	0.104	0.109	0.113	0.113	0.118	0.108	0.1	0.101	0.103	0.107	0.106	0.118	0.12	0.252	0.11	0.117	0.111	0.103	0.101	0.103	0.101	0.104	0.102	0.114	0.107	0.108	0.099	0.099	0.101	0.103	0.105	0.103	0.105	0.137	0.106
05:50:00	30.3	0.159	0.151	0.166	0.158	0.172	0.164	0.124	0.148	0.126	0.136	0.137	0.135	0.106	0.104	0.109	0.112	0.113	0.119	0.105	0.1	0.101	0.104	0.107	0.106	0.119	0.121	0.262	0.111	0.118	0.112	0.103	0.101	0.103	0.101	0.104	0.102	0.115	0.108	0.108	0.1	0.101	0.1	0.103	0.105	0.103	0.105	0.137	0.106
06:00:00	30.3	0.168	0.156	0.172	0.163	0.176	0.168	0.126	0.151	0.128	0.139	0.14	0.141	0.106	0.105	0.109	0.114	0.113	0.12	0.106	0.1	0.101	0.103	0.108	0.106	0.121	0.123	0.273	0.112	0.12	0.114	0.103	0.101	0.103	0.101	0.103	0.102	0.114	0.108	0.109	0.1	0.1	0.1	0.103	0.105	0.103	0.105	0.137	0.105
06:10:00	30.3	0.174	0.163	0.176	0.167	0.181	0.171	0.128	0.154	0.131	0.142	0.144	0.148	0.107	0.105	0.109	0.115	0.114	0.121	0.105	0.1	0.101	0.103	0.108	0.107	0.123	0.125	0.282	0.113	0.121	0.115	0.103	0.101	0.103	0.101	0.103	0.102	0.115	0.109	0.11	0.1	0.099	0.101	0.103	0.105	0.103	0.105	0.137	0.106
06:20:00	30.3	0.18	0.169	0.181	0.173	0.187	0.176	0.131	0.157	0.133	0.146	0.147	0.162	0.107	0.105	0.109	0.115	0.114	0.121	0.106	0.101	0.101	0.103	0.108	0.106	0.125	0.127	0.292	0.114	0.121	0.117	0.103	0.101	0.103	0.101	0.104	0.102	0.116	0.109	0.11	0.099	0.103	0.101	0.103	0.105	0.103	0.105	0.137	0.105
06:30:00	30.3	0.181	0.171	0.186	0.177	0.193	0.18	0.133	0.158	0.137	0.15	0.153	0.176	0.107	0.105	0.109	0.116	0.116	0.123	0.106	0.101	0.101	0.104	0.108	0.106	0.127	0.129	0.301	0.115	0.123	0.119	0.103	0.101	0.103	0.101	0.103	0.102	0.117	0.11	0.11	0.1	0.102	0.101	0.103	0.105	0.103	0.105	0.137	0.106
06:40:00	30.3	0.189	0.174	0.191	0.183	0.198	0.184	0.137	0.16	0.142	0.157	0.158	0.196	0.107	0.105	0.11	0.117	0.116	0.124	0.106	0.101	0.101	0.104	0.108	0.107	0.129	0.139	0.305	0.116	0.125	0.12	0.103	0.101	0.103	0.101	0.103	0.102	0.118	0.111	0.111	0.1	0.1	0.101	0.103	0.105	0.103	0.105	0.137	0.106
06:50:00	30.3	0.195	0.179	0.2	0.19	0.207	0.191	0.14	0.162	0.145	0.158	0.173	0.207	0.107	0.105	0.11	0.119	0.118	0.125	0.106	0.101	0.101	0.104	0.108	0.107	0.13	0.133	0.311	0.117	0.126	0.121	0.103	0.101	0.103	0.101	0.104	0.102	0.119	0.111	0.112	0.1	0.101	0.101	0.103	0.105	0.103	0.105	0.137	0.106
07:00:00	30.3	0.203	0.187	0.208	0.197	0.212	0.199	0.144	0.165	0.15	0.16	0.167	0.218	0.107	0.105	0.11	0.119	0.117	0.124	0.106	0.101	0.102	0.104	0.108	0.107	0.133	0.135	0.316	0.119	0.127	0.123	0.103	0.101	0.103	0.101	0.104	0.102	0.119	0.111	0.112	0.1	0.1	0.101	0.103	0.105	0.103	0.105	0.137	0.106
07:10:00	30.3	0.212	0.195	0.212	0.204	0.22	0.204	0.147	0.17	0.151	0.165	0.17	0.201	0.107	0.105	0.11	0.12	0.119	0.129	0.106	0.101	0.101	0.104	0.108	0.107	0.136	0.139	0.319	0.12	0.13	0.124	0.103	0.101	0.103	0.101	0.103	0.102	0.12	0.111	0.112	0.1	0.1	0.101	0.103	0.105	0.103	0.105	0.137	0.106
07:20:00	30.3	0.22	0.202	0.221	0.208	0.229	0.211	0.152	0.175	0.154	0.17	0.191	0.177	0.107	0.105	0.109	0.121	0.119	0.127	0.107	0.101	0.101	0.104	0.108	0.107	0.141	0.144	0.322	0.122	0.132	0.125	0.103	0.101	0.103	0.101	0.103	0.102	0.122	0.112	0.113	0.101	0.1	0.101	0.103	0.105	0.103	0.105	0.137	0.105
07:30:00	30.3	0.228	0.208	0.228	0.215	0.236	0.22	0.153	0.18	0.155	0.173	0.179	0.177	0.108	0.105	0.109	0.122	0.122	0.128	0.106	0.101	0.102	0.104	0.108	0.107	0.142	0.145	0.325	0.123	0.135	0.127	0.103	0.101	0.103	0.101	0.104	0.102	0.123	0.112	0.114	0.1	0.1	0.102	0.103	0.105	0.103	0.105	0.137	0.106
07:40:00	30.2	0.235	0.217	0.236	0.223	0.246	0.226	0.155	0.186	0.159	0.18	0.183	0.184	0.108	0.105	0.109	0.121	0.122	0.127	0.106	0.101	0.102	0.104	0.108	0.107	0.145	0.149	0.328	0.125	0.138	0.13	0.103	0.101	0.103	0.101	0.103	0.102	0.123	0.113	0.114	0.101	0.102	0.101	0.103	0.105	0.103	0.105	0.137	0.106
07:50:00	30.2	0.245	0.225	0.245	0.231	0.258	0.234	0.16	0.194	0.16	0.189	0.192	0.192	0.107	0.106	0.11	0.123	0.124	0.128	0.106	0.102	0.102	0.104	0.108	0.107	0.147	0.151	0.332	0.127	0.141	0.133	0.103	0.101	0.103	0.101	0.104	0.102	0.125	0.114	0.115	0.1	0.104	0.102	0.103	0.105	0.103	0.105	0.137	0.106
08:00:00	30.2	0.255	0.234	0.253	0.24	0.268	0.24	0.163	0.203	0.164	0.196	0.203	0.202	0.108	0.105	0.11	0.123	0.124	0.13	0.107	0.102	0.102	0.104	0.108	0.107	0.151	0.154	0.338	0.128	0.143	0.137	0.103	0.101	0.103	0.101	0.104	0.102	0.126	0.115	0.116	0.101	0.103	0.102	0.103	0.106	0.103	0.105	0.137	0.106
08:10:00	30.2	0.267	0.242	0.267	0.252	0.275	0.253	0.17	0.212	0.169	0.2	0.207	0.207	0.108	0.106	0.11	0.125	0.126	0.132	0.107	0.102	0.103	0.104	0.108	0.109	0.155	0.17	0.342	0.131	0.147	0.147	0.103	0.101	0.103	0.101	0.104	0.102	0.127	0.115	0.116	0.101	0.101	0.102	0.103	0.105	0.103	0.105	0.137	0.105
08:20:00	30.2	0.277	0.253	0.276	0.259	0.283	0.262	0.176	0.218	0.174	0.204	0.211	0.211	0.108	0.106	0.11	0.127	0.126	0.132	0.107	0.102	0.102	0.105	0.109	0.107	0.161	0.163	0.343	0.133	0.156	0.154	0.103	0.101	0.103	0.101	0.104	0.102	0.128	0.116	0.117	0.101	0.102	0.102	0.103	0.106	0.103	0.105	0.137	0.106
08:30:00	30.2	0.287	0.261	0.285	0.267	0.288	0.27	0.182	0.228	0.179	0.206	0.217	0.219	0.108	0.106	0.11	0.129	0.128	0.133	0.107	0.102	0.103	0.104	0.108	0.107	0.167	0.164	0.347	0.135	0.157	0.153	0.103	0.101	0.103	0.101	0.103	0.102	0.13	0.117	0.118	0.101	0.102	0.102	0.103	0.106	0.103	0.105	0.137	0.106
08:40:00	30.2	0.297	0.271	0.292	0.273	0.293	0.278	0.19	0.235	0.186	0.211	0.224	0.226	0.108	0.106	0.11	0.128	0.129	0.136	0.107	0.102	0.103	0.105	0.109	0.107	0.171	0.18	0.352	0.138	0.156	0.151	0.103	0.101	0.103	0.101	0.104	0.102	0.131	0.119	0.119	0.101	0.101	0.102	0.103	0.106	0.103	0.105	0.137	0.106
08:50:00	30.2	0.302	0.281	0.299	0.281	0.3	0.283	0.197	0.243	0.192	0.218	0.227	0.229	0.108	0.106	0.111	0.13	0.131	0.136	0.107	0.102	0.102	0.105	0.109	0.107	0.174	0.182	0.356	0.141	0.155	0.161	0.103	0.101	0.103	0.101	0.104	0.102	0.133	0.118	0.119	0.101	0.101	0.102	0.103	0.106	0.103	0.105	0.137	0.106
09:00:00	30.2	0.309	0.289	0.307	0.287	0.302	0.286	0.206	0.25	0.199	0.224	0.231	0.236	0.108	0.106	0.111	0.133	0.133	0.136	0.107	0.102	0.103	0.104	0.109	0.107	0.179	0.185	0.357	0.145	0.157	0.154	0.103	0.101	0.103	0.101	0.103	0.102	0.134	0.119	0.12	0.102	0.102	0.103	0.103	0.106	0.103	0.105	0.137	0.106
09:10:00	30.2	0.316	0.297	0.314	0.297	0.306	0.292	0.213	0.261	0.206	0.233	0.239	0.243	0.108	0.106	0.111	0.134	0.135	0.14	0.107	0.102	0.103	0.105	0.109	0.107	0.186	0.191	0.362	0.149	0.161	0.155	0.103	0.101	0.103	0.101	0.104	0.102	0.136	0.12	0.121	0.102	0.102	0.103	0.103	0.106	0.103	0.105	0.137	0.106
09:20:00	30.2	0.312	0.306	0.319	0.302	0.31	0.294	0.22	0.268	0.219	0.241	0.249	0.253	0.108	0.106	0.111	0.135	0.136	0.141	0.107	0.103	0.103	0.105	0.109	0.107	0.191	0.203	0.365	0.153	0.166	0.157	0.103	0.101	0.103	0.101	0.103	0.102	0.137	0.124	0.122	0.102	0.102	0.103	0.103	0.105	0.103	0.105	0.137	0.106
09:30:00	30.2	0.319	0.311	0.319	0.302	0.313	0.296	0.227	0.271	0.226	0.245	0.257	0.264	0.109	0.107	0.111	0.136	0.14	0.142	0.108	0.102	0.103	0.105	0.109	0.107	0.197	0.208	0.369	0.155	0.17	0.159	0.103	0.101	0.103	0.101	0.104	0.102	0.139	0.122	0.123	0.102	0.104	0.103	0.103	0.106	0.103	0.105	0.137	0.106
09:40:00	30.2	0.322	0.314	0.323	0.305	0.315	0.301	0.234	0.28	0.236	0.253	0.269	0.274	0.108	0.107	0.111	0.139	0.14	0.143	0.107	0.103	0.103	0.105	0.109	0.107	0.204	0.218	0.371	0.159	0.175	0.164	0.103	0.101	0.103	0.101	0.104	0.102	0.141	0.123	0.124	0.102	0.102	0.104	0.103	0.105	0.103	0.105	0.137	0.106
09:50:00	30.2	0.323	0.312	0.323	0.306	0.315	0.305	0.243	0.284	0.243	0.261	0.276	0.282	0.108	0.106	0.111	0.141	0.14	0.144	0.108	0.103	0.103	0.105	0.109	0.108	0.209	0.218	0.374	0.164	0.179	0.167	0.103	0.101	0.103	0.101	0.104	0.102	0.142	0.124	0.125	0.102	0.102	0.103	0.103	0.105	0.103	0.105	0.137	0.105
10:00:00	30.1	0.33	0.317	0.329	0.31	0.32	0.307	0.255	0.289	0.255	0.273	0.286	0.293	0.108	0.106	0.111	0.142	0.143	0.147	0.108	0.104	0.103	0.105	0.109	0.109	0.221	0.231	0.378	0.169	0.184	0.173	0.103	0.101	0.103	0.101	0.104	0.102	0.144	0.125	0.126	0.102	0.103	0.103	0.103	0.105	0.103	0.105	0.137	0.106
10:10:00	30.1	0.33	0.321	0.331	0.31	0.32	0.313	0.262	0.291	0.259	0.28	0.293	0.297	0.109	0.107	0.111	0.144	0.144	0.149	0.108	0.102	0.103	0.105	0.109	0.109	0.226	0.238	0.381	0.173	0.19	0.178	0.103	0.101	0.103	0.101	0.104	0.102	0.145	0.126	0.127	0.102	0.103	0.103	0.103	0.105	0.103	0.105	0.137	0.106
10:20:00	30.1	0.336	0.324	0.337	0.316	0.326	0.316	0.271	0.294	0.268	0.288	0.298	0.305	0.109	0.107	0.112	0.147	0.147	0.151	0.109	0.103	0.104	0.105	0.11	0.107	0.234	0.249	0.382	0.177	0.196	0.183	0.103	0.101	0.103	0.101	0.104	0.102	0.148	0.13	0.129	0.108	0.104	0.103	0.103	0.105	0.103	0.105	0.137	0.106
10:30:00	30.1	0.336	0.325	0.337	0.315	0.328	0.317	0.278	0.297	0.275	0.298	0.308	0.309	0.109	0.107	0.112	0.148	0.148	0.155	0.108	0.104	0.104	0.105	0.11	0.108	0.237	0.245	0.385	0.183	0.206	0.19	0.103	0.101	0.103	0.101	0.104	0.102	0.148	0.131	0.13	0.103	0.106	0.104	0.103	0.105	0.103	0.105	0.137	0.106
10:40:00	30.1	0.345	0.332	0.343	0.32	0.333	0.322	0.283	0.301	0.278	0.305	0.313	0.317	0.109	0.107	0.111	0.151	0.151	0.156	0.108	0.104	0.104	0.105	0.109	0.108	0.249	0.257	0.388	0.191	0.211	0.196	0.103	0.101	0.103	0.101	0.104	0.102	0.153	0.13	0.131	0.103	0.103	0.103	0.103	0.105	0.103	0.105	0.137	0.106
10:50:00	30.1	0.347	0.335	0.346	0.324	0.334	0.325	0.286	0.305	0.282	0.31	0.32	0.32	0.109	0.107	0.112	0.152	0.155	0.159	0.108	0.103	0.105	0.105	0.11	0.107	0.254	0.264	0.391	0.197	0.219	0.204	0.103	0.101	0.103	0.101	0.104	0.102	0.156	0.131	0.133	0.102	0.103	0.104	0.103	0.105	0.103	0.105	0.137	0.106
11:00:00	30.1	0.348	0.337	0.35	0.325	0.338	0.33	0.286	0.309	0.283	0.315	0.321	0.326	0.11	0.107	0.112	0.153	0.159	0.163	0.109	0.103	0.105	0.105	0.11	0.108	0.259	0.268	0.395	0.202	0.226	0.211	0.103	0.101	0.103	0.101	0.104	0.102	0.156	0.132	0.135	0.103	0.106	0.104	0.103	0.105	0.103	0.105	0.137	0.105
11:10:00	30.1	0.353	0.342	0.351	0.328	0.34	0.332	0.29	0.311	0.289	0.32	0.325	0.331	0.109	0.107	0.112	0.155	0.162	0.165	0.109	0.104	0.105	0.106	0.11	0.108	0.264	0.282	0.397	0.211	0.235	0.219	0.103	0.101	0.103	0.101	0.104	0.102	0.161	0.135	0.136	0.103	0.103	0.105	0.103	0.105	0.103	0.105	0.137	0.106
11:20:00	30.1	0.355	0.345	0.356	0.331	0.343	0.336	0.293	0.316	0.292	0.328	0.328	0.334	0.11	0.108	0.112	0.159	0.163	0.166	0.109	0.104	0.104	0.106	0.11	0.109	0.269	0.287	0.4	0.216	0.242	0.225	0.103	0.101	0.103	0.101	0.104	0.102	0.162	0.136	0.138	0.103	0.103	0.104	0.103	0.105	0.103	0.105	0.137	0.106
11:30:00	30.1	0.359	0.348	0.361	0.335	0.347	0.34	0.297	0.319	0.296	0.33	0.332	0.336	0.109	0.108	0.112	0.162	0.168	0.169	0.109	0.104	0.105	0.106	0.11	0.108	0.275	0.285	0.402	0.223	0.249	0.234	0.103	0.101	0.103	0.101	0.104	0.102	0.165	0.138	0.139	0.104	0.103	0.104	0.103	0.105	0.103	0.105	0.137	0.106
11:40:00	30.1	0.361	0.352	0.362	0.34	0.349	0.341	0.298	0.322	0.298	0.334	0.334	0.339	0.11	0.108	0.111	0.163	0.171	0.174	0.109	0.104	0.105	0.106	0.11	0.108	0.279	0.294	0.404	0.233	0.258	0.241	0.103	0.101	0.103	0.101	0.104	0.102	0.169	0.139	0.142	0.103	0.107	0.104	0.103	0.105	0.103	0.105	0.137	0.106
11:50:00	30.1	0.363	0.355	0.367	0.342	0.351	0.343	0.302	0.324	0.303	0.336	0.338	0.342	0.11	0.108	0.112	0.169	0.173	0.176	0.109	0.104	0.105	0.106	0.11	0.108	0.285	0.298	0.405	0.24	0.263	0.248	0.103	0.101	0.103	0.101	0.104	0.102	0.172	0.141	0.142	0.104	0.105	0.104	0.103	0.105	0.103	0.105	0.137	0.105
12:00:00	30.1	0.368	0.36	0.37	0.345	0.355	0.347	0.304	0.33	0.304	0.34	0.341	0.346	0.11	0.108	0.112	0.173	0.178	0.178	0.11	0.105	0.105	0.106	0.11	0.108	0.289	0.3	0.407	0.248	0.272	0.257	0.103	0.101	0.103	0.101	0.104	0.102	0.175	0.142	0.145	0.104	0.104	0.105	0.103	0.105	0.103	0.105	0.137	0.106
12:10:00	30	0.369	0.363	0.373	0.347	0.359	0.35	0.307	0.336	0.308	0.344	0.342	0.348	0.11	0.108	0.112	0.176	0.178	0.182	0.11	0.104	0.105	0.106	0.11	0.109	0.293	0.307	0.41	0.255	0.278	0.263	0.103	0.101	0.103	0.101	0.105	0.102	0.178	0.145	0.147	0.104	0.104	0.106	0.103	0.105	0.103	0.105	0.137	0.106
12:20:00	30.1	0.375	0.366	0.376	0.351	0.359	0.354	0.31	0.336	0.31	0.347	0.345	0.353	0.111	0.108	0.112	0.178	0.184	0.185	0.11	0.105	0.106	0.106	0.11	0.109	0.298	0.304	0.412	0.261	0.279	0.268	0.103	0.101	0.103	0.101	0.104	0.102	0.181	0.148	0.15	0.104	0.104	0.105	0.103	0.105	0.103	0.105	0.137	0.106
12:30:00	30.1	0.376	0.368	0.379	0.351	0.362	0.355	0.313	0.339	0.313	0.35	0.348	0.356	0.111	0.108	0.112	0.182	0.188	0.188	0.11	0.105	0.106	0.106	0.11	0.108	0.301	0.311	0.412	0.269	0.285	0.276	0.103	0.101	0.103	0.101	0.104	0.102	0.185	0.149	0.152	0.105	0.105	0.105	0.103	0.105	0.103	0.105	0.137	0.106
12:40:00	30	0.378	0.37	0.38	0.357	0.363	0.358	0.317	0.341	0.315	0.353	0.353	0.358	0.111	0.109	0.113	0.184	0.189	0.192	0.11	0.105	0.106	0.106	0.111	0.109	0.305	0.318	0.413	0.273	0.286	0.28	0.103	0.101	0.103	0.101	0.104	0.102	0.186	0.151	0.153	0.104	0.105	0.106	0.103	0.105	0.103	0.105	0.137	0.106
12:50:00	30.1	0.381	0.373	0.383	0.358	0.367	0.362	0.321	0.343	0.32	0.357	0.356	0.361	0.111	0.109	0.112	0.188	0.194	0.194	0.11	0.105	0.106	0.107	0.111	0.109	0.31	0.324	0.415	0.279	0.288	0.283	0.103	0.101	0.103	0.101	0.104	0.102	0.191	0.153	0.157	0.104	0.105	0.106	0.103	0.105	0.103	0.105	0.137	0.105
13:00:00	30.1	0.383	0.375	0.384	0.36	0.369	0.363	0.324	0.343	0.322	0.36	0.357	0.365	0.111	0.108	0.113	0.194	0.195	0.196	0.111	0.105	0.106	0.107	0.111	0.109	0.313	0.324	0.416	0.283	0.292	0.286	0.103	0.101	0.103	0.101	0.105	0.102	0.193	0.154	0.159	0.104	0.105	0.107	0.103	0.105	0.103	0.105	0.137	0.106
13:10:00	30.1	0.383	0.377	0.387	0.361	0.37	0.365	0.325	0.347	0.325	0.363	0.363	0.366	0.11	0.109	0.112	0.197	0.2	0.202	0.11	0.105	0.106	0.106	0.111	0.108	0.316	0.324	0.419	0.287	0.293	0.29	0.103	0.101	0.103	0.101	0.104	0.102	0.196	0.159	0.16	0.105	0.106	0.107	0.103	0.105	0.103	0.105	0.137	0.105
13:20:00	30.1	0.389	0.379	0.391	0.365	0.372	0.366	0.33	0.35	0.326	0.366	0.364	0.37	0.111	0.108	0.112	0.201	0.204	0.206	0.111	0.105	0.106	0.107	0.111	0.109	0.32	0.326	0.42	0.289	0.298	0.291	0.103	0.101	0.103	0.101	0.104	0.102	0.201	0.163	0.162	0.106	0.106	0.106	0.103	0.105	0.103	0.105	0.137	0.106
13:30:00	30.1	0.391	0.382	0.39	0.366	0.375	0.369	0.331	0.351	0.329	0.369	0.368	0.371	0.111	0.109	0.112	0.205	0.209	0.211	0.111	0.105	0.106	0.106	0.111	0.108	0.322	0.334	0.421	0.29	0.3	0.294	0.103	0.101	0.103	0.101	0.104	0.102	0.205	0.162	0.166	0.105	0.111	0.107	0.103	0.105	0.103	0.105	0.137	0.105
13:40:00	30.1	0.393	0.384	0.393	0.367	0.377	0.371	0.332	0.353	0.332	0.371	0.37	0.375	0.111	0.109	0.112	0.209	0.214	0.215	0.111	0.106	0.106	0.106	0.111	0.109	0.326	0.333	0.422	0.294	0.303	0.295	0.103	0.101	0.103	0.101	0.104	0.102	0.209	0.166	0.168	0.105	0.107	0.107	0.103	0.105	0.103	0.105	0.137	0.106
13:50:00	30.1	0.394	0.387	0.397	0.371	0.38	0.374	0.334	0.354	0.334	0.372	0.371	0.377	0.112	0.109	0.114	0.215	0.217	0.219	0.111	0.107	0.107	0.107	0.111	0.11	0.328	0.339	0.423	0.297	0.309	0.301	0.103	0.101	0.103	0.101	0.104	0.102	0.214	0.168	0.171	0.106	0.108	0.107	0.103	0.105	0.103	0.105	0.137	0.105
14:00:00	30.1	0.397	0.387	0.398	0.372	0.381	0.377	0.339	0.358	0.337	0.375	0.375	0.378	0.111	0.11	0.113	0.221	0.221	0.222	0.111	0.106	0.107	0.107	0.111	0.109	0.332	0.345	0.427	0.3	0.313	0.303	0.103	0.101	0.103	0.101	0.104	0.103	0.219	0.171	0.175	0.106	0.108	0.108	0.103	0.105	0.103	0.105	0.137	0.106
14:10:00	30.1	0.403	0.392	0.402	0.375	0.384	0.378	0.338	0.362	0.339	0.375	0.376	0.38	0.111	0.11	0.113	0.224	0.223	0.228	0.114	0.107	0.107	0.107	0.111	0.109	0.336	0.348	0.427	0.306	0.317	0.308	0.103	0.101	0.103	0.101	0.105	0.103	0.221	0.176	0.179	0.107	0.111	0.107	0.103	0.105	0.103	0.105	0.137	0.106
14:20:00	30.1	0.401	0.393	0.402	0.377	0.385	0.38	0.342	0.361	0.341	0.378	0.379	0.383	0.112	0.11	0.114	0.229	0.23	0.232	0.111	0.107	0.107	0.107	0.111	0.109	0.338	0.342	0.427	0.307	0.318	0.307	0.103	0.101	0.103	0.101	0.105	0.102	0.226	0.178	0.182	0.107	0.108	0.107	0.103	0.105	0.103	0.105	0.137	0.105
14:30:00	30.1	0.403	0.396	0.403	0.377	0.387	0.381	0.345	0.363	0.345	0.379	0.381	0.386	0.112	0.11	0.114	0.234	0.233	0.237	0.113	0.107	0.108	0.107	0.111	0.109	0.34	0.354	0.43	0.311	0.32	0.312	0.103	0.101	0.103	0.101	0.104	0.102	0.23	0.182	0.184	0.106	0.11	0.108	0.103	0.105	0.103	0.105	0.137	0.106
14:40:00	30.1	0.405	0.396	0.404	0.38	0.389	0.383	0.346	0.366	0.346	0.381	0.381	0.385	0.112	0.11	0.114	0.238	0.238	0.243	0.113	0.107	0.107	0.107	0.111	0.109	0.343	0.345	0.431	0.313	0.323	0.316	0.103	0.101	0.103	0.101	0.104	0.102	0.236	0.185	0.189	0.105	0.109	0.108	0.103	0.105	0.103	0.105	0.137	0.105
14:50:00	30.1	0.406	0.398	0.41	0.381	0.39	0.386	0.348	0.368	0.348	0.383	0.383	0.387	0.111	0.11	0.115	0.241	0.243	0.246	0.112	0.107	0.107	0.107	0.111	0.109	0.345	0.355	0.432	0.317	0.327	0.318	0.103	0.101	0.103	0.101	0.105	0.103	0.24	0.19	0.192	0.108	0.111	0.109	0.103	0.105	0.103	0.105	0.137	0.106
15:00:00	30.1	0.41	0.4	0.41	0.383	0.393	0.386	0.35	0.369	0.351	0.385	0.386	0.389	0.112	0.111	0.114	0.247	0.246	0.25	0.115	0.107	0.108	0.107	0.111	0.109	0.348	0.36	0.432	0.321	0.329	0.32	0.103	0.101	0.103	0.101	0.104	0.102	0.243	0.192	0.195	0.107	0.11	0.108	0.103	0.105	0.103	0.105	0.137	0.105
15:10:00	30.1	0.411	0.403	0.411	0.385	0.392	0.388	0.352	0.372	0.352	0.386	0.386	0.39	0.112	0.111	0.114	0.252	0.254	0.253	0.114	0.107	0.108	0.108	0.112	0.11	0.35	0.353	0.436	0.322	0.326	0.321	0.103	0.101	0.103	0.101	0.104	0.102	0.248	0.197	0.199	0.108	0.11	0.108	0.103	0.105	0.103	0.105	0.137	0.105
15:20:00	30.1	0.411	0.404	0.413	0.385	0.393	0.388	0.353	0.372	0.352	0.388	0.388	0.393	0.112	0.11	0.114	0.257	0.257	0.26	0.112	0.108	0.108	0.108	0.112	0.11	0.354	0.36	0.436	0.325	0.331	0.326	0.103	0.101	0.103	0.101	0.104	0.102	0.253	0.2	0.202	0.108	0.111	0.108	0.103	0.105	0.103	0.105	0.137	0.105
15:30:00	30.1	0.415	0.407	0.415	0.39	0.395	0.389	0.357	0.374	0.355	0.388	0.388	0.394	0.113	0.11	0.115	0.262	0.265	0.265	0.113	0.108	0.108	0.107	0.112	0.11	0.353	0.358	0.437	0.327	0.333	0.326	0.103	0.101	0.103	0.101	0.104	0.102	0.257	0.204	0.206	0.108	0.111	0.109	0.103	0.105	0.103	0.105	0.137	0.106
15:40:00	30.1	0.418	0.408	0.419	0.39	0.398	0.391	0.358	0.376	0.356	0.388	0.389	0.395	0.112	0.112	0.114	0.264	0.268	0.27	0.112	0.108	0.109	0.108	0.112	0.11	0.359	0.361	0.439	0.329	0.337	0.329	0.103	0.101	0.103	0.101	0.104	0.102	0.261	0.207	0.21	0.108	0.112	0.11	0.103	0.105	0.103	0.105	0.137	0.106
15:50:00	30.1	0.418	0.411	0.42	0.393	0.398	0.394	0.359	0.376	0.359	0.391	0.391	0.396	0.112	0.11	0.115	0.267	0.273	0.275	0.113	0.108	0.109	0.108	0.112	0.11	0.36	0.372	0.44	0.332	0.338	0.331	0.103	0.101	0.103	0.101	0.104	0.102	0.266	0.211	0.214	0.108	0.112	0.109	0.103	0.105	0.103	0.105	0.137	0.106
16:00:00	30.1	0.421	0.414	0.422	0.395	0.401	0.394	0.362	0.379	0.361	0.393	0.392	0.397	0.113	0.112	0.114	0.274	0.278	0.281	0.114	0.109	0.109	0.108	0.112	0.11	0.361	0.368	0.44	0.334	0.339	0.332	0.103	0.101	0.103	0.101	0.104	0.102	0.269	0.213	0.218	0.11	0.111	0.11	0.103	0.105	0.103	0.105	0.137	0.106
16:10:00	30.1	0.421	0.414	0.422	0.394	0.399	0.395	0.365	0.381	0.363	0.392	0.393	0.4	0.113	0.112	0.116	0.279	0.283	0.288	0.114	0.108	0.109	0.108	0.112	0.11	0.365	0.375	0.441	0.337	0.341	0.334	0.103	0.101	0.103	0.101	0.104	0.102	0.274	0.22	0.223	0.111	0.114	0.111	0.103	0.105	0.103	0.105	0.137	0.106
16:20:00	30.1	0.424	0.416	0.424	0.396	0.404	0.396	0.366	0.381	0.365	0.395	0.395	0.401	0.114	0.11	0.114	0.286	0.29	0.292	0.114	0.109	0.109	0.108	0.112	0.112	0.366	0.377	0.444	0.337	0.343	0.336	0.103	0.101	0.103	0.101	0.104	0.102	0.279	0.223	0.226	0.108	0.114	0.113	0.103	0.105	0.103	0.105	0.137	0.106
16:30:00	30.2	0.421	0.416	0.425	0.4	0.403	0.398	0.367	0.383	0.366	0.396	0.396	0.401	0.113	0.111	0.116	0.293	0.296	0.298	0.116	0.109	0.109	0.108	0.112	0.11	0.365	0.373	0.444	0.336	0.342	0.336	0.103	0.101	0.103	0.101	0.104	0.102	0.283	0.228	0.23	0.109	0.115	0.11	0.103	0.105	0.103	0.105	0.137	0.106
16:40:00	30.2	0.424	0.419	0.428	0.4	0.408	0.4	0.369	0.387	0.366	0.395	0.397	0.403	0.115	0.11	0.116	0.297	0.301	0.306	0.116	0.109	0.11	0.108	0.112	0.112	0.371	0.375	0.445	0.339	0.346	0.338	0.103	0.101	0.103	0.101	0.104	0.102	0.286	0.233	0.235	0.11	0.113	0.112	0.103	0.105	0.103	0.105	0.137	0.106
16:50:00	30.2	0.428	0.42	0.428	0.403	0.407	0.401	0.371	0.386	0.371	0.397	0.398	0.404	0.113	0.111	0.116	0.304	0.307	0.312	0.115	0.11	0.109	0.108	0.112	0.11	0.373	0.381	0.446	0.344	0.348	0.341	0.103	0.101	0.103	0.101	0.104	0.102	0.291	0.237	0.238	0.11	0.113	0.111	0.103	0.105	0.103	0.105	0.137	0.106
17:00:00	30.2	0.427	0.421	0.429	0.403	0.407	0.401	0.374	0.386	0.372	0.398	0.399	0.405	0.112	0.112	0.115	0.313	0.314	0.321	0.114	0.109	0.11	0.108	0.112	0.11	0.374	0.387	0.447	0.346	0.35	0.343	0.103	0.101	0.103	0.101	0.104	0.102	0.295	0.241	0.244	0.11	0.114	0.11	0.103	0.105	0.103	0.105	0.137	0.106
17:10:00	30.2	0.427	0.422	0.431	0.405	0.406	0.403	0.372	0.389	0.37	0.398	0.4	0.406	0.114	0.111	0.116	0.318	0.319	0.324	0.118	0.109	0.11	0.108	0.112	0.11	0.376	0.38	0.446	0.345	0.352	0.347	0.103	0.101	0.103	0.101	0.104	0.102	0.299	0.246	0.247	0.11	0.114	0.111	0.103	0.105	0.103	0.105	0.137	0.106
17:20:00	30.2	0.428	0.425	0.432	0.406	0.407	0.403	0.375	0.391	0.373	0.399	0.403	0.408	0.114	0.113	0.115	0.324	0.325	0.331	0.114	0.11	0.11	0.108	0.112	0.112	0.378	0.392	0.448	0.347	0.353	0.348	0.103	0.101	0.103	0.101	0.104	0.102	0.305	0.249	0.252	0.11	0.114	0.114	0.103	0.105	0.103	0.105	0.137	0.106
17:30:00	30.3	0.43	0.424	0.434	0.408	0.411	0.405	0.378	0.391	0.373	0.399	0.403	0.408	0.115	0.111	0.115	0.33	0.329	0.336	0.114	0.11	0.11	0.108	0.112	0.11	0.378	0.391	0.449	0.347	0.355	0.347	0.103	0.101	0.103	0.101	0.104	0.102	0.308	0.257	0.257	0.11	0.114	0.112	0.103	0.105	0.103	0.105	0.137	0.106
17:40:00	30.3	0.432	0.426	0.435	0.408	0.41	0.405	0.378	0.394	0.375	0.401	0.404	0.41	0.115	0.111	0.116	0.336	0.334	0.341	0.114	0.11	0.111	0.108	0.113	0.109	0.38	0.385	0.45	0.35	0.357	0.349	0.103	0.101	0.103	0.102	0.104	0.102	0.313	0.259	0.261	0.111	0.115	0.116	0.103	0.105	0.103	0.105	0.137	0.106
17:50:00	30.3	0.433	0.429	0.435	0.409	0.41	0.404	0.378	0.392	0.377	0.401	0.405	0.411	0.113	0.114	0.119	0.34	0.341	0.346	0.118	0.11	0.111	0.108	0.113	0.11	0.383	0.387	0.45	0.354	0.358	0.352	0.103	0.101	0.103	0.102	0.105	0.102	0.32	0.264	0.266	0.114	0.115	0.113	0.103	0.105	0.103	0.105	0.137	0.106
18:00:00	30.3	0.434	0.43	0.436	0.409	0.41	0.406	0.38	0.394	0.379	0.401	0.406	0.411	0.114	0.113	0.116	0.345	0.345	0.352	0.118	0.11	0.111	0.108	0.112	0.11	0.384	0.391	0.451	0.357	0.361	0.355	0.103	0.101	0.103	0.102	0.104	0.102	0.322	0.269	0.271	0.112	0.115	0.112	0.103	0.105	0.103	0.105	0.137	0.106
18:10:00	30.4	0.434	0.432	0.436	0.41	0.412	0.406	0.383	0.395	0.379	0.402	0.405	0.414	0.115	0.113	0.115	0.351	0.351	0.356	0.116	0.111	0.111	0.108	0.113	0.11	0.387	0.388	0.451	0.353	0.36	0.354	0.103	0.101	0.103	0.102	0.104	0.102	0.327	0.273	0.276	0.111	0.116	0.114	0.103	0.105	0.103	0.105	0.137	0.106
18:20:00	30.5	0.438	0.433	0.437	0.411	0.414	0.408	0.382	0.397	0.382	0.401	0.404	0.413	0.117	0.114	0.118	0.355	0.354	0.362	0.119	0.112	0.111	0.108	0.112	0.11	0.388	0.4	0.45	0.356	0.361	0.356	0.103	0.101	0.103	0.102	0.104	0.102	0.332	0.278	0.283	0.117	0.116	0.115	0.103	0.105	0.103	0.105	0.137	0.106
18:30:00	30.5	0.437	0.433	0.44	0.412	0.414	0.409	0.388	0.397	0.382	0.403	0.406	0.412	0.114	0.115	0.118	0.36	0.36	0.365	0.114	0.113	0.112	0.108	0.112	0.11	0.388	0.396	0.454	0.358	0.362	0.357	0.103	0.101	0.103	0.102	0.104	0.102	0.333	0.286	0.288	0.113	0.116	0.119	0.103	0.105	0.103	0.105	0.137	0.106
18:40:00	30.5	0.439	0.436	0.44	0.415	0.417	0.408	0.385	0.398	0.383	0.404	0.407	0.414	0.115	0.113	0.116	0.366	0.364	0.368	0.124	0.11	0.111	0.108	0.113	0.11	0.391	0.393	0.453	0.359	0.363	0.359	0.103	0.101	0.103	0.102	0.104	0.102	0.339	0.286	0.293	0.113	0.116	0.116	0.103	0.105	0.103	0.105	0.137	0.106
18:50:00	30.6	0.439	0.437	0.44	0.411	0.415	0.41	0.386	0.398	0.384	0.406	0.407	0.415	0.117	0.112	0.12	0.368	0.37	0.373	0.121	0.112	0.111	0.108	0.112	0.11	0.394	0.395	0.455	0.358	0.363	0.359	0.103	0.101	0.103	0.102	0.104	0.102	0.345	0.292	0.296	0.113	0.118	0.118	0.103	0.105	0.103	0.105	0.137	0.106
19:00:00	30.6	0.443	0.435	0.442	0.414	0.418	0.411	0.388	0.402	0.388	0.406	0.407	0.414	0.115	0.112	0.118	0.372	0.373	0.378	0.117	0.116	0.112	0.108	0.113	0.11	0.392	0.404	0.455	0.36	0.365	0.36	0.103	0.101	0.103	0.102	0.104	0.102	0.347	0.297	0.301	0.113	0.117	0.118	0.103	0.105	0.103	0.105	0.137	0.106
19:10:00	30.7	0.443	0.436	0.442	0.415	0.416	0.413	0.389	0.403	0.387	0.406	0.406	0.417	0.114	0.115	0.12	0.379	0.377	0.382	0.119	0.114	0.113	0.108	0.113	0.11	0.395	0.399	0.456	0.363	0.366	0.36	0.103	0.101	0.103	0.102	0.104	0.102	0.353	0.302	0.308	0.119	0.118	0.115	0.103	0.105	0.103	0.105	0.137	0.106
19:20:00	30.7	0.445	0.44	0.443	0.417	0.418	0.412	0.389	0.402	0.387	0.406	0.408	0.417	0.115	0.116	0.117	0.383	0.381	0.386	0.116	0.113	0.112	0.108	0.113	0.11	0.395	0.398	0.458	0.363	0.367	0.363	0.103	0.101	0.103	0.102	0.104	0.102	0.357	0.308	0.312	0.118	0.118	0.115	0.103	0.105	0.103	0.105	0.137	0.105
19:30:00	30.7	0.445	0.44	0.444	0.417	0.419	0.412	0.39	0.404	0.389	0.408	0.41	0.418	0.115	0.112	0.12	0.386	0.384	0.389	0.12	0.111	0.112	0.109	0.113	0.111	0.398	0.4	0.458	0.366	0.368	0.364	0.103	0.101	0.103	0.102	0.104	0.102	0.36	0.311	0.317	0.12	0.118	0.116	0.103	0.105	0.103	0.105	0.137	0.106
19:40:00	30.7	0.445	0.442	0.445	0.418	0.421	0.415	0.391	0.405	0.393	0.409	0.41	0.42	0.116	0.112	0.117	0.391	0.389	0.394	0.12	0.115	0.113	0.109	0.113	0.11	0.395	0.407	0.458	0.368	0.369	0.362	0.103	0.101	0.103	0.102	0.104	0.102	0.364	0.318	0.321	0.122	0.121	0.121	0.103	0.105	0.103	0.105	0.137	0.106
19:50:00	30.7	0.448	0.441	0.445	0.419	0.42	0.415	0.393	0.407	0.394	0.409	0.412	0.42	0.117	0.116	0.116	0.394	0.389	0.397	0.118	0.116	0.113	0.109	0.113	0.11	0.399	0.404	0.461	0.369	0.369	0.362	0.103	0.101	0.103	0.102	0.104	0.102	0.369	0.322	0.327	0.117	0.124	0.123	0.103	0.105	0.103	0.105	0.137	0.106
20:00:00	30.7	0.45	0.443	0.445	0.417	0.42	0.418	0.394	0.406	0.396	0.41	0.412	0.421	0.119	0.117	0.119	0.396	0.392	0.402	0.117	0.113	0.113	0.109	0.112	0.111	0.399	0.407	0.455	0.37	0.369	0.364	0.103	0.101	0.103	0.102	0.104	0.102	0.371	0.328	0.331	0.118	0.121	0.122	0.103	0.105	0.103	0.105	0.137	0.106
20:10:00	30.7	0.449	0.444	0.446	0.417	0.422	0.417	0.396	0.406	0.396	0.409	0.413	0.421	0.119	0.113	0.12	0.402	0.398	0.403	0.122	0.117	0.113	0.108	0.113	0.11	0.4	0.403	0.459	0.37	0.37	0.364	0.103	0.101	0.103	0.102	0.104	0.102	0.376	0.331	0.336	0.121	0.121	0.123	0.103	0.105	0.103	0.105	0.137	0.106
20:20:00	30.7	0.45	0.446	0.448	0.421	0.424	0.421	0.394	0.408	0.396	0.409	0.411	0.42	0.117	0.113	0.119	0.403	0.4	0.408	0.117	0.115	0.114	0.109	0.113	0.11	0.401	0.41	0.457	0.373	0.372	0.365	0.103	0.101	0.103	0.102	0.104	0.102	0.379	0.337	0.342	0.123	0.124	0.118	0.103	0.105	0.103	0.105	0.137	0.105
20:30:00	30.7	0.451	0.446	0.447	0.422	0.427	0.419	0.396	0.41	0.397	0.41	0.413	0.422	0.12	0.118	0.12	0.408	0.401	0.411	0.117	0.117	0.114	0.108	0.113	0.11	0.403	0.405	0.458	0.372	0.373	0.368	0.103	0.101	0.103	0.102	0.104	0.102	0.381	0.34	0.347	0.121	0.121	0.12	0.103	0.105	0.103	0.105	0.137	0.106
20:40:00	30.7	0.452	0.449	0.45	0.424	0.425	0.42	0.399	0.41	0.397	0.413	0.417	0.421	0.119	0.118	0.119	0.41	0.407	0.415	0.118	0.116	0.114	0.109	0.113	0.111	0.404	0.412	0.459	0.373	0.374	0.367	0.103	0.101	0.103	0.102	0.104	0.102	0.385	0.346	0.351	0.123	0.128	0.124	0.103	0.105	0.103	0.105	0.137	0.105
20:50:00	30.7	0.453	0.449	0.452	0.424	0.426	0.421	0.397	0.414	0.397	0.413	0.415	0.422	0.12	0.113	0.118	0.414	0.409	0.414	0.119	0.12	0.114	0.109	0.113	0.11	0.403	0.404	0.46	0.374	0.374	0.369	0.103	0.101	0.103	0.102	0.104	0.102	0.387	0.351	0.355	0.122	0.126	0.125	0.103	0.105	0.103	0.105	0.137	0.106
21:00:00	30.7	0.455	0.449	0.451	0.423	0.427	0.425	0.398	0.414	0.399	0.413	0.416	0.423	0.12	0.118	0.117	0.418	0.414	0.421	0.126	0.113	0.114	0.109	0.113	0.111	0.403	0.413	0.46	0.375	0.375	0.369	0.103	0.101	0.103	0.102	0.104	0.102	0.392	0.355	0.361	0.123	0.127	0.12	0.103	0.105	0.103	0.105	0.137	0.106
21:10:00	30.7	0.454	0.451	0.453	0.424	0.431	0.423	0.4	0.413	0.401	0.413	0.418	0.424	0.118	0.113	0.122	0.421	0.414	0.421	0.12	0.114	0.115	0.109	0.113	0.111	0.404	0.411	0.459	0.378	0.377	0.369	0.103	0.101	0.103	0.102	0.104	0.102	0.393	0.361	0.364	0.124	0.124	0.126	0.103	0.105	0.103	0.105	0.137	0.106
21:20:00	30.7	0.454	0.454	0.451	0.426	0.43	0.424	0.398	0.414	0.399	0.415	0.42	0.424	0.12	0.118	0.119	0.424	0.417	0.425	0.122	0.115	0.117	0.109	0.114	0.112	0.405	0.41	0.46	0.376	0.378	0.37	0.103	0.101	0.103	0.102	0.104	0.102	0.397	0.365	0.369	0.118	0.128	0.121	0.103	0.105	0.103	0.105	0.137	0.106
21:30:00	30.7	0.457	0.453	0.454	0.425	0.429	0.424	0.403	0.416	0.4	0.414	0.418	0.424	0.12	0.117	0.12	0.423	0.417	0.427	0.123	0.117	0.118	0.109	0.113	0.111	0.403	0.409	0.46	0.378	0.378	0.37	0.103	0.101	0.103	0.102	0.104	0.102	0.401	0.369	0.373	0.122	0.123	0.12	0.103	0.105	0.103	0.105	0.137	0.106
21:40:00	30.7	0.459	0.453	0.455	0.427	0.43	0.424	0.403	0.418	0.402	0.415	0.418	0.424	0.117	0.115	0.117	0.426	0.42	0.43	0.122	0.121	0.116	0.109	0.113	0.111	0.406	0.414	0.458	0.379	0.379	0.372	0.103	0.101	0.103	0.102	0.104	0.102	0.403	0.371	0.376	0.123	0.128	0.129	0.103	0.105	0.103	0.105	0.137	0.106
21:50:00	30.7	0.457	0.453	0.456	0.428	0.433	0.424	0.401	0.417	0.402	0.415	0.42	0.425	0.118	0.119	0.12	0.43	0.424	0.432	0.122	0.118	0.115	0.109	0.113	0.111	0.403	0.407	0.461	0.38	0.38	0.374	0.103	0.101	0.103	0.102	0.104	0.102	0.409	0.376	0.381	0.125	0.124	0.129	0.103	0.105	0.103	0.105	0.137	0.106
22:00:00	30.7	0.459	0.456	0.457	0.429	0.433	0.425	0.404	0.419	0.403	0.416	0.421	0.426	0.118	0.117	0.119	0.431	0.424	0.433	0.122	0.12	0.115	0.109	0.113	0.112	0.405	0.411	0.461	0.379	0.381	0.375	0.103	0.101	0.103	0.102	0.104	0.102	0.409	0.379	0.384	0.127	0.124	0.128	0.103	0.105	0.104	0.105	0.137	0.106
22:10:00	30.6	0.461	0.456	0.458	0.428	0.434	0.425	0.407	0.417	0.404	0.417	0.423	0.427	0.118	0.116	0.117	0.435	0.427	0.436	0.127	0.119	0.116	0.11	0.113	0.111	0.406	0.411	0.462	0.381	0.383	0.374	0.103	0.101	0.103	0.102	0.104	0.102	0.412	0.385	0.387	0.127	0.127	0.122	0.103	0.105	0.103	0.105	0.137	0.106
22:20:00	30.6	0.462	0.456	0.46	0.428	0.434	0.425	0.407	0.42	0.403	0.416	0.421	0.427	0.117	0.116	0.118	0.435	0.428	0.439	0.128	0.119	0.115	0.109	0.114	0.111	0.404	0.408	0.463	0.382	0.381	0.375	0.103	0.101	0.103	0.102	0.104	0.102	0.413	0.387	0.391	0.128	0.131	0.132	0.103	0.105	0.103	0.105	0.137	0.106
22:30:00	30.6	0.461	0.455	0.46	0.432	0.435	0.426	0.407	0.421	0.407	0.418	0.421	0.429	0.119	0.116	0.118	0.437	0.431	0.441	0.119	0.12	0.116	0.109	0.114	0.112	0.406	0.412	0.463	0.385	0.381	0.376	0.103	0.101	0.103	0.102	0.104	0.102	0.417	0.389	0.396	0.126	0.131	0.122	0.103	0.105	0.103	0.105	0.137	0.106
22:40:00	30.6	0.462	0.457	0.46	0.429	0.436	0.426	0.408	0.42	0.408	0.419	0.421	0.427	0.119	0.12	0.116	0.439	0.431	0.442	0.122	0.115	0.117	0.11	0.114	0.112	0.404	0.417	0.465	0.384	0.383	0.379	0.103	0.101	0.103	0.102	0.104	0.102	0.421	0.396	0.397	0.127	0.134	0.125	0.103	0.105	0.103	0.105	0.137	0.106
22:50:00	30.5	0.463	0.459	0.461	0.43	0.437	0.425	0.407	0.421	0.406	0.418	0.423	0.429	0.118	0.116	0.117	0.44	0.432	0.446	0.13	0.118	0.116	0.11	0.113	0.112	0.405	0.418	0.463	0.385	0.385	0.377	0.103	0.101	0.103	0.102	0.104	0.102	0.422	0.399	0.401	0.129	0.132	0.123	0.103	0.105	0.103	0.105	0.137	0.106
23:00:00	30.5	0.462	0.458	0.459	0.433	0.437	0.427	0.409	0.42	0.408	0.42	0.425	0.429	0.121	0.12	0.118	0.442	0.435	0.447	0.124	0.119	0.116	0.11	0.114	0.111	0.407	0.415	0.464	0.385	0.385	0.378	0.103	0.101	0.103	0.102	0.104	0.102	0.423	0.4	0.404	0.128	0.128	0.123	0.103	0.105	0.103	0.105	0.137	0.106
23:10:00	30.5	0.464	0.458	0.46	0.433	0.438	0.428	0.409	0.421	0.408	0.42	0.423	0.429	0.121	0.12	0.119	0.443	0.437	0.449	0.122	0.118	0.116	0.109	0.114	0.113	0.405	0.419	0.467	0.387	0.387	0.379	0.103	0.101	0.103	0.102	0.104	0.102	0.428	0.403	0.408	0.125	0.126	0.124	0.103	0.105	0.103	0.105	0.137	0.106
23:20:00	30.5	0.465	0.46	0.462	0.435	0.439	0.426	0.411	0.424	0.408	0.42	0.424	0.429	0.122	0.118	0.119	0.447	0.439	0.452	0.131	0.118	0.117	0.11	0.114	0.112	0.408	0.412	0.465	0.386	0.388	0.38	0.103	0.101	0.103	0.102	0.104	0.102	0.43	0.408	0.413	0.129	0.132	0.129	0.103	0.105	0.103	0.105	0.137	0.106
23:30:00	30.5	0.466	0.461	0.464	0.434	0.439	0.425	0.412	0.423	0.41	0.42	0.425	0.429	0.122	0.115	0.117	0.447	0.438	0.455	0.129	0.121	0.118	0.11	0.114	0.113	0.408	0.413	0.467	0.386	0.387	0.378	0.103	0.101	0.103	0.102	0.104	0.102	0.433	0.411	0.412	0.132	0.136	0.135	0.103	0.105	0.103	0.105	0.137	0.106
23:40:00	30.5	0.465	0.462	0.465	0.433	0.438	0.429	0.412	0.424	0.409	0.421	0.426	0.431	0.122	0.121	0.122	0.448	0.443	0.456	0.125	0.116	0.117	0.11	0.114	0.113	0.408	0.419	0.468	0.388	0.389	0.382	0.103	0.101	0.103	0.102	0.104	0.102	0.433	0.416	0.419	0.125	0.135	0.126	0.103	0.105	0.103	0.105	0.137	0.106
23:50:00	30.5	0.465	0.461	0.466	0.435	0.44	0.428	0.413	0.424	0.411	0.421	0.427	0.429	0.121	0.12	0.124	0.45	0.446	0.457	0.131	0.122	0.118	0.11	0.114	0.113	0.41	0.425	0.467	0.386	0.388	0.383	0.103	0.101	0.103	0.102	0.104	0.102	0.437	0.418	0.417	0.125	0.132	0.126	0.103	0.105	0.103	0.105	0.137	0.106
1 day, 0:00:00	30.5	0.467	0.464	0.467	0.437	0.439	0.427	0.413	0.426	0.414	0.422	0.427	0.432	0.122	0.119	0.119	0.454	0.448	0.459	0.134	0.123	0.12	0.11	0.114	0.113	0.411	0.419	0.468	0.387	0.39	0.383	0.103	0.101	0.103	0.102	0.104	0.102	0.438	0.419	0.422	0.134	0.132	0.133	0.103	0.105	0.103	0.105	0.137	0.106
1 day, 0:10:00	30.5	0.467	0.465	0.465	0.44	0.441	0.429	0.414	0.426	0.414	0.421	0.427	0.431	0.12	0.116	0.118	0.454	0.446	0.462	0.134	0.124	0.118	0.11	0.115	0.113	0.411	0.413	0.467	0.388	0.391	0.385	0.103	0.101	0.103	0.102	0.104	0.102	0.441	0.422	0.427	0.134	0.132	0.138	0.103	0.105	0.103	0.105	0.137	0.106
1 day, 0:20:00	30.5	0.467	0.462	0.467	0.438	0.442	0.43	0.413	0.428	0.413	0.423	0.428	0.431	0.12	0.118	0.118	0.454	0.447	0.465	0.123	0.123	0.119	0.11	0.114	0.114	0.412	0.411	0.469	0.388	0.393	0.383	0.103	0.101	0.103	0.102	0.104	0.102	0.441	0.425	0.428	0.127	0.136	0.127	0.103	0.105	0.103	0.105	0.137	0.106
1 day, 0:30:00	30.5	0.469	0.465	0.466	0.44	0.442	0.43	0.416	0.426	0.415	0.423	0.43	0.432	0.12	0.119	0.12	0.455	0.449	0.465	0.123	0.125	0.119	0.11	0.114	0.114	0.414	0.415	0.47	0.39	0.392	0.385	0.103	0.101	0.103	0.102	0.104	0.103	0.444	0.428	0.43	0.131	0.137	0.133	0.103	0.105	0.103	0.105	0.137	0.106
1 day, 0:40:00	30.5	0.467	0.466	0.467	0.439	0.443	0.429	0.415	0.427	0.415	0.423	0.428	0.434	0.119	0.118	0.121	0.456	0.45	0.466	0.133	0.126	0.119	0.11	0.114	0.116	0.412	0.413	0.471	0.389	0.392	0.385	0.103	0.101	0.103	0.102	0.104	0.102	0.445	0.432	0.435	0.136	0.136	0.13	0.103	0.105	0.103	0.105	0.137	0.106
1 day, 0:50:00	30.5	0.468	0.466	0.469	0.439	0.443	0.432	0.415	0.428	0.416	0.423	0.428	0.432	0.124	0.116	0.123	0.458	0.45	0.466	0.133	0.125	0.119	0.11	0.115	0.117	0.414	0.414	0.471	0.39	0.394	0.387	0.103	0.101	0.103	0.102	0.104	0.102	0.446	0.434	0.437	0.137	0.135	0.131	0.103	0.105	0.103	0.105	0.137	0.106
1 day, 1:00:00	30.5	0.47	0.465	0.469	0.438	0.443	0.432	0.417	0.429	0.416	0.423	0.43	0.431	0.118	0.12	0.122	0.461	0.452	0.468	0.133	0.12	0.12	0.111	0.114	0.117	0.415	0.417	0.47	0.391	0.394	0.385	0.103	0.101	0.103	0.102	0.104	0.103	0.449	0.436	0.438	0.138	0.136	0.13	0.103	0.105	0.103	0.105	0.137	0.106
1 day, 1:10:00	30.5	0.472	0.466	0.47	0.441	0.443	0.433	0.417	0.429	0.418	0.422	0.429	0.434	0.123	0.121	0.119	0.46	0.454	0.469	0.13	0.126	0.121	0.11	0.114	0.116	0.416	0.417	0.472	0.392	0.395	0.389	0.103	0.101	0.103	0.102	0.104	0.102	0.45	0.438	0.444	0.135	0.138	0.143	0.103	0.105	0.104	0.105	0.137	0.106
1 day, 1:20:00	30.5	0.471	0.466	0.47	0.442	0.443	0.433	0.417	0.429	0.418	0.423	0.43	0.432	0.12	0.12	0.119	0.465	0.456	0.473	0.136	0.119	0.122	0.11	0.115	0.116	0.415	0.418	0.472	0.395	0.396	0.388	0.103	0.101	0.103	0.102	0.104	0.103	0.452	0.443	0.445	0.138	0.14	0.131	0.103	0.105	0.103	0.105	0.137	0.106
1 day, 1:30:00	30.5	0.471	0.467	0.471	0.442	0.445	0.433	0.416	0.428	0.42	0.423	0.431	0.434	0.123	0.116	0.124	0.463	0.457	0.472	0.126	0.127	0.121	0.11	0.114	0.12	0.417	0.416	0.472	0.394	0.398	0.39	0.103	0.101	0.103	0.102	0.104	0.102	0.454	0.443	0.447	0.133	0.142	0.142	0.103	0.105	0.103	0.105	0.137	0.106
1 day, 1:40:00	30.5	0.472	0.468	0.47	0.438	0.444	0.435	0.416	0.432	0.419	0.424	0.431	0.433	0.121	0.116	0.121	0.465	0.457	0.475	0.125	0.129	0.121	0.111	0.114	0.119	0.417	0.418	0.473	0.393	0.397	0.391	0.103	0.101	0.103	0.102	0.104	0.102	0.456	0.447	0.449	0.14	0.141	0.139	0.103	0.105	0.103	0.105	0.137	0.106
1 day, 1:50:00	30.5	0.472	0.468	0.471	0.443	0.445	0.437	0.42	0.432	0.421	0.423	0.432	0.434	0.118	0.123	0.118	0.466	0.46	0.477	0.125	0.122	0.121	0.11	0.115	0.118	0.416	0.419	0.471	0.394	0.398	0.391	0.103	0.101	0.103	0.102	0.104	0.102	0.456	0.447	0.451	0.137	0.143	0.134	0.103	0.105	0.103	0.105	0.137	0.106
1 day, 2:00:00	30.5	0.472	0.467	0.473	0.442	0.447	0.435	0.42	0.431	0.421	0.421	0.433	0.435	0.117	0.117	0.118	0.466	0.462	0.478	0.126	0.123	0.121	0.11	0.115	0.118	0.42	0.42	0.473	0.395	0.398	0.389	0.103	0.101	0.103	0.102	0.104	0.102	0.458	0.449	0.453	0.144	0.146	0.141	0.103	0.105	0.103	0.105	0.137	0.106
1 day, 2:10:00	30.5	0.473	0.468	0.472	0.441	0.446	0.439	0.42	0.433	0.421	0.424	0.432	0.433	0.121	0.118	0.118	0.467	0.46	0.477	0.127	0.13	0.121	0.11	0.115	0.117	0.42	0.42	0.474	0.394	0.398	0.391	0.103	0.101	0.103	0.102	0.104	0.102	0.458	0.45	0.455	0.143	0.144	0.145	0.103	0.105	0.103	0.105	0.137	0.106
1 day, 2:20:00	30.5	0.472	0.47	0.474	0.443	0.446	0.439	0.421	0.432	0.421	0.422	0.432	0.433	0.12	0.121	0.119	0.47	0.461	0.479	0.126	0.126	0.122	0.11	0.114	0.116	0.419	0.421	0.475	0.396	0.4	0.394	0.103	0.101	0.103	0.102	0.104	0.102	0.457	0.452	0.454	0.149	0.142	0.136	0.103	0.105	0.103	0.105	0.137	0.106
1 day, 2:30:00	30.5	0.475	0.468	0.474	0.442	0.447	0.438	0.423	0.433	0.422	0.425	0.435	0.434	0.124	0.117	0.123	0.47	0.461	0.485	0.139	0.127	0.123	0.11	0.115	0.117	0.42	0.422	0.475	0.397	0.398	0.393	0.103	0.101	0.103	0.102	0.104	0.102	0.46	0.456	0.457	0.136	0.142	0.144	0.103	0.105	0.103	0.105	0.137	0.106
1 day, 2:40:00	30.5	0.476	0.47	0.475	0.441	0.447	0.438	0.421	0.433	0.421	0.424	0.434	0.435	0.125	0.12	0.122	0.471	0.462	0.483	0.138	0.127	0.123	0.111	0.115	0.118	0.422	0.424	0.476	0.398	0.399	0.394	0.103	0.101	0.103	0.102	0.104	0.102	0.462	0.457	0.461	0.142	0.147	0.146	0.103	0.105	0.103	0.105	0.137	0.106
1 day, 2:50:00	30.4	0.476	0.47	0.476	0.442	0.446	0.437	0.421	0.432	0.421	0.425	0.434	0.434	0.12	0.118	0.119	0.47	0.466	0.484	0.134	0.123	0.123	0.11	0.115	0.118	0.423	0.425	0.476	0.398	0.398	0.394	0.103	0.101	0.103	0.102	0.104	0.102	0.465	0.456	0.463	0.139	0.146	0.154	0.103	0.105	0.103	0.105	0.137	0.106
1 day, 3:00:00	30.4	0.477	0.472	0.475	0.441	0.449	0.44	0.423	0.432	0.421	0.426	0.436	0.436	0.12	0.119	0.122	0.471	0.467	0.487	0.129	0.133	0.125	0.11	0.115	0.119	0.423	0.424	0.475	0.397	0.4	0.394	0.103	0.101	0.103	0.102	0.104	0.102	0.464	0.46	0.463	0.15	0.145	0.152	0.103	0.105	0.103	0.105	0.137	0.105
1 day, 3:10:00	30.4	0.475	0.47	0.476	0.443	0.449	0.442	0.422	0.434	0.422	0.425	0.434	0.434	0.123	0.121	0.125	0.473	0.468	0.487	0.136	0.126	0.123	0.111	0.115	0.118	0.424	0.43	0.477	0.398	0.398	0.395	0.103	0.101	0.103	0.102	0.104	0.102	0.467	0.46	0.463	0.141	0.147	0.139	0.103	0.105	0.103	0.105	0.137	0.106
1 day, 3:20:00	30.4	0.479	0.472	0.476	0.444	0.447	0.442	0.425	0.433	0.422	0.426	0.437	0.435	0.126	0.122	0.118	0.474	0.467	0.486	0.129	0.132	0.124	0.11	0.115	0.12	0.424	0.434	0.477	0.399	0.4	0.396	0.103	0.101	0.103	0.102	0.104	0.102	0.466	0.465	0.466	0.143	0.146	0.147	0.103	0.105	0.103	0.105	0.137	0.106
1 day, 3:30:00	30.4	0.478	0.473	0.476	0.444	0.447	0.444	0.422	0.434	0.421	0.427	0.436	0.437	0.123	0.116	0.126	0.475	0.468	0.49	0.13	0.124	0.127	0.111	0.115	0.12	0.425	0.427	0.478	0.397	0.401	0.397	0.103	0.101	0.103	0.102	0.104	0.102	0.464	0.464	0.47	0.153	0.146	0.149	0.103	0.105	0.103	0.105	0.137	0.105
1 day, 3:40:00	30.3	0.477	0.472	0.478	0.442	0.448	0.443	0.422	0.435	0.421	0.427	0.436	0.436	0.124	0.123	0.118	0.476	0.469	0.49	0.136	0.13	0.127	0.111	0.115	0.121	0.424	0.425	0.48	0.4	0.399	0.396	0.103	0.101	0.103	0.102	0.104	0.102	0.469	0.467	0.468	0.153	0.147	0.149	0.103	0.105	0.103	0.105	0.137	0.105
1 day, 3:50:00	30.3	0.479	0.471	0.478	0.443	0.449	0.444	0.423	0.433	0.423	0.429	0.436	0.434	0.118	0.121	0.119	0.477	0.47	0.493	0.141	0.132	0.125	0.11	0.115	0.121	0.426	0.428	0.478	0.4	0.4	0.396	0.103	0.101	0.103	0.102	0.104	0.102	0.469	0.467	0.471	0.152	0.149	0.145	0.103	0.105	0.103	0.105	0.137	0.105
1 day, 4:00:00	30.2	0.479	0.473	0.478	0.442	0.449	0.443	0.424	0.434	0.422	0.428	0.437	0.435	0.119	0.117	0.126	0.477	0.471	0.491	0.135	0.125	0.126	0.111	0.115	0.122	0.425	0.428	0.48	0.401	0.402	0.398	0.103	0.101	0.103	0.102	0.104	0.102	0.468	0.468	0.471	0.159	0.151	0.157	0.103	0.105	0.103	0.105	0.137	0.106
1 day, 4:10:00	30.2	0.478	0.473	0.478	0.446	0.452	0.443	0.422	0.436	0.422	0.428	0.434	0.433	0.122	0.116	0.128	0.478	0.472	0.494	0.14	0.136	0.128	0.111	0.115	0.121	0.426	0.427	0.479	0.402	0.398	0.397	0.103	0.101	0.103	0.102	0.104	0.102	0.471	0.468	0.472	0.149	0.15	0.157	0.103	0.105	0.103	0.105	0.137	0.105
1 day, 4:20:00	30.2	0.479	0.472	0.478	0.45	0.45	0.446	0.423	0.434	0.42	0.428	0.436	0.437	0.122	0.116	0.128	0.48	0.473	0.493	0.141	0.131	0.126	0.111	0.115	0.12	0.426	0.428	0.478	0.4	0.401	0.396	0.103	0.101	0.103	0.102	0.104	0.102	0.47	0.47	0.472	0.157	0.15	0.157	0.103	0.105	0.103	0.105	0.137	0.105
1 day, 4:30:00	30.2	0.481	0.472	0.481	0.45	0.45	0.445	0.424	0.436	0.423	0.43	0.435	0.437	0.12	0.116	0.119	0.48	0.475	0.495	0.13	0.125	0.127	0.111	0.115	0.12	0.427	0.428	0.479	0.401	0.402	0.397	0.103	0.101	0.103	0.102	0.104	0.102	0.474	0.473	0.474	0.157	0.153	0.151	0.103	0.105	0.103	0.105	0.137	0.106
1 day, 4:40:00	30.2	0.479	0.472	0.478	0.447	0.451	0.445	0.423	0.437	0.422	0.429	0.438	0.438	0.123	0.119	0.119	0.481	0.475	0.497	0.136	0.129	0.126	0.111	0.115	0.12	0.427	0.43	0.478	0.4	0.4	0.398	0.103	0.101	0.103	0.102	0.104	0.102	0.475	0.472	0.475	0.161	0.152	0.161	0.103	0.105	0.103	0.105	0.137	0.106
1 day, 4:50:00	30.1	0.481	0.474	0.478	0.447	0.451	0.448	0.424	0.437	0.422	0.43	0.437	0.438	0.119	0.116	0.125	0.481	0.475	0.497	0.13	0.126	0.128	0.111	0.115	0.121	0.428	0.43	0.479	0.402	0.401	0.399	0.103	0.101	0.103	0.102	0.104	0.102	0.475	0.475	0.48	0.154	0.153	0.158	0.103	0.105	0.103	0.105	0.137	0.106
1 day, 5:00:00	30.1	0.48	0.476	0.479	0.447	0.45	0.446	0.424	0.436	0.422	0.43	0.435	0.436	0.12	0.116	0.122	0.481	0.477	0.5	0.131	0.126	0.128	0.111	0.115	0.12	0.429	0.43	0.475	0.401	0.401	0.399	0.103	0.101	0.103	0.102	0.104	0.102	0.477	0.477	0.478	0.158	0.155	0.158	0.103	0.105	0.103	0.105	0.137	0.106
1 day, 5:10:00	30.1	0.482	0.474	0.481	0.448	0.45	0.448	0.424	0.44	0.423	0.43	0.439	0.438	0.127	0.116	0.122	0.482	0.476	0.499	0.14	0.134	0.129	0.111	0.115	0.118	0.431	0.431	0.479	0.402	0.403	0.399	0.103	0.101	0.103	0.102	0.104	0.102	0.475	0.479	0.478	0.161	0.156	0.16	0.103	0.105	0.103	0.105	0.137	0.106
1 day, 5:20:00	30.1	0.481	0.474	0.48	0.448	0.452	0.448	0.424	0.438	0.425	0.43	0.435	0.439	0.127	0.117	0.12	0.483	0.477	0.5	0.147	0.131	0.128	0.111	0.115	0.121	0.431	0.431	0.478	0.401	0.404	0.398	0.103	0.101	0.103	0.102	0.104	0.102	0.475	0.479	0.476	0.16	0.157	0.161	0.103	0.105	0.103	0.105	0.137	0.106
1 day, 5:30:00	30.1	0.482	0.474	0.48	0.451	0.451	0.449	0.423	0.438	0.424	0.429	0.435	0.439	0.126	0.121	0.128	0.485	0.48	0.502	0.139	0.137	0.128	0.11	0.115	0.121	0.433	0.429	0.479	0.402	0.403	0.399	0.103	0.101	0.103	0.102	0.104	0.102	0.478	0.477	0.479	0.161	0.158	0.156	0.103	0.105	0.103	0.105	0.137	0.105
1 day, 5:40:00	30.1	0.481	0.476	0.48	0.451	0.452	0.448	0.423	0.439	0.425	0.431	0.439	0.44	0.121	0.12	0.128	0.486	0.48	0.503	0.145	0.127	0.129	0.111	0.116	0.122	0.43	0.431	0.48	0.401	0.403	0.401	0.103	0.101	0.103	0.102	0.104	0.102	0.481	0.479	0.482	0.163	0.158	0.164	0.103	0.105	0.103	0.105	0.137	0.106
1 day, 5:50:00	30.1	0.482	0.475	0.479	0.446	0.45	0.449	0.425	0.438	0.424	0.43	0.435	0.44	0.129	0.125	0.13	0.486	0.478	0.503	0.132	0.141	0.13	0.111	0.116	0.12	0.429	0.43	0.478	0.403	0.405	0.401	0.103	0.101	0.103	0.102	0.104	0.102	0.48	0.48	0.479	0.167	0.158	0.166	0.103	0.105	0.103	0.105	0.137	0.106
1 day, 6:00:00	30	0.482	0.474	0.48	0.449	0.453	0.449	0.424	0.441	0.425	0.43	0.433	0.44	0.126	0.126	0.128	0.486	0.482	0.5	0.133	0.139	0.13	0.111	0.116	0.118	0.429	0.431	0.48	0.403	0.404	0.4	0.103	0.101	0.103	0.102	0.104	0.102	0.483	0.482	0.483	0.163	0.159	0.164	0.103	0.105	0.103	0.105	0.137	0.105
1 day, 6:10:00	30.1	0.481	0.477	0.479	0.45	0.453	0.447	0.424	0.44	0.424	0.43	0.435	0.44	0.124	0.117	0.125	0.488	0.48	0.506	0.142	0.135	0.13	0.111	0.116	0.122	0.431	0.431	0.479	0.404	0.404	0.401	0.103	0.102	0.103	0.102	0.104	0.103	0.483	0.483	0.482	0.161	0.161	0.166	0.103	0.105	0.103	0.105	0.137	0.106
1 day, 6:20:00	30	0.482	0.476	0.479	0.45	0.454	0.448	0.425	0.441	0.424	0.431	0.434	0.44	0.122	0.118	0.124	0.491	0.479	0.506	0.149	0.131	0.13	0.111	0.116	0.122	0.431	0.431	0.48	0.404	0.405	0.404	0.103	0.101	0.103	0.102	0.104	0.102	0.485	0.483	0.485	0.162	0.162	0.163	0.103	0.105	0.103	0.105	0.137	0.106
1 day, 6:30:00	30.1	0.48	0.473	0.478	0.45	0.452	0.45	0.426	0.443	0.425	0.432	0.434	0.441	0.127	0.116	0.122	0.49	0.481	0.508	0.143	0.13	0.131	0.11	0.116	0.124	0.431	0.432	0.479	0.403	0.407	0.402	0.103	0.101	0.103	0.102	0.104	0.102	0.485	0.484	0.483	0.165	0.162	0.166	0.103	0.105	0.103	0.105	0.137	0.106
1 day, 6:40:00	30	0.482	0.475	0.477	0.45	0.454	0.449	0.425	0.442	0.424	0.432	0.436	0.443	0.129	0.123	0.13	0.491	0.482	0.507	0.14	0.139	0.131	0.111	0.116	0.125	0.432	0.432	0.481	0.404	0.406	0.404	0.103	0.101	0.103	0.102	0.104	0.103	0.486	0.488	0.482	0.166	0.163	0.166	0.103	0.105	0.103	0.105	0.137	0.106
1 day, 6:50:00	30	0.48	0.475	0.477	0.45	0.452	0.452	0.425	0.443	0.426	0.432	0.434	0.442	0.12	0.126	0.131	0.49	0.484	0.508	0.133	0.132	0.132	0.111	0.115	0.125	0.431	0.43	0.481	0.403	0.407	0.405	0.103	0.101	0.103	0.102	0.104	0.103	0.484	0.485	0.482	0.167	0.163	0.17	0.103	0.105	0.103	0.105	0.137	0.106
1 day, 7:00:00	30	0.478	0.475	0.48	0.449	0.457	0.452	0.426	0.441	0.425	0.431	0.435	0.442	0.128	0.118	0.123	0.49	0.484	0.507	0.145	0.138	0.133	0.111	0.115	0.124	0.432	0.43	0.478	0.402	0.404	0.406	0.103	0.101	0.103	0.102	0.104	0.102	0.485	0.485	0.482	0.168	0.165	0.168	0.103	0.105	0.103	0.105	0.137	0.106
1 day, 7:10:00	30	0.475	0.477	0.481	0.45	0.454	0.452	0.424	0.442	0.426	0.43	0.434	0.443	0.129	0.118	0.119	0.492	0.483	0.51	0.135	0.143	0.134	0.111	0.115	0.12	0.434	0.431	0.477	0.401	0.406	0.406	0.103	0.101	0.103	0.102	0.104	0.103	0.483	0.487	0.479	0.168	0.166	0.173	0.103	0.105	0.103	0.105	0.137	0.106
1 day, 7:20:00	30	0.477	0.476	0.482	0.45	0.454	0.453	0.427	0.442	0.425	0.431	0.434	0.442	0.13	0.117	0.131	0.494	0.486	0.513	0.141	0.133	0.133	0.111	0.115	0.121	0.433	0.431	0.48	0.403	0.406	0.408	0.103	0.101	0.103	0.102	0.104	0.103	0.486	0.488	0.481	0.173	0.163	0.173	0.103	0.105	0.103	0.105	0.137	0.106
1 day, 7:30:00	30	0.477	0.476	0.482	0.451	0.456	0.451	0.426	0.443	0.426	0.432	0.435	0.442	0.129	0.12	0.127	0.493	0.486	0.513	0.144	0.135	0.133	0.111	0.115	0.124	0.431	0.43	0.478	0.401	0.408	0.408	0.103	0.101	0.103	0.102	0.104	0.102	0.485	0.492	0.485	0.177	0.164	0.174	0.103	0.105	0.103	0.105	0.137	0.105
1 day, 7:40:00	30	0.482	0.475	0.48	0.45	0.455	0.452	0.427	0.444	0.43	0.432	0.435	0.443	0.128	0.118	0.126	0.494	0.486	0.512	0.148	0.138	0.135	0.111	0.116	0.118	0.433	0.433	0.477	0.406	0.41	0.408	0.103	0.101	0.103	0.102	0.104	0.103	0.49	0.491	0.486	0.177	0.162	0.176	0.103	0.105	0.103	0.105	0.137	0.106
1 day, 7:50:00	30	0.482	0.472	0.48	0.451	0.457	0.451	0.428	0.443	0.428	0.432	0.436	0.442	0.131	0.125	0.125	0.497	0.486	0.515	0.15	0.142	0.135	0.111	0.116	0.123	0.433	0.432	0.48	0.406	0.411	0.409	0.103	0.101	0.103	0.101	0.104	0.102	0.489	0.494	0.484	0.175	0.165	0.173	0.103	0.105	0.103	0.105	0.137	0.105
1 day, 8:00:00	30	0.481	0.474	0.479	0.452	0.457	0.451	0.428	0.444	0.43	0.432	0.436	0.443	0.13	0.119	0.12	0.497	0.489	0.515	0.135	0.138	0.135	0.111	0.116	0.123	0.434	0.434	0.48	0.405	0.41	0.409	0.103	0.101	0.103	0.102	0.104	0.103	0.488	0.49	0.487	0.176	0.171	0.176	0.103	0.105	0.103	0.105	0.137	0.106
1 day, 8:10:00	30	0.483	0.473	0.479	0.451	0.456	0.453	0.432	0.443	0.429	0.434	0.437	0.442	0.126	0.123	0.12	0.497	0.487	0.519	0.151	0.148	0.135	0.111	0.115	0.121	0.434	0.438	0.48	0.407	0.409	0.409	0.103	0.101	0.103	0.102	0.104	0.102	0.489	0.494	0.489	0.177	0.173	0.175	0.103	0.105	0.103	0.105	0.137	0.105
1 day, 8:20:00	30	0.483	0.474	0.479	0.454	0.457	0.453	0.432	0.443	0.43	0.434	0.434	0.443	0.133	0.127	0.12	0.499	0.49	0.516	0.141	0.146	0.135	0.111	0.115	0.127	0.43	0.438	0.48	0.406	0.41	0.41	0.103	0.101	0.103	0.102	0.104	0.103	0.492	0.496	0.491	0.181	0.171	0.178	0.103	0.105	0.103	0.105	0.137	0.106
1 day, 8:30:00	30	0.48	0.473	0.479	0.452	0.455	0.452	0.432	0.445	0.429	0.435	0.437	0.442	0.13	0.129	0.125	0.497	0.49	0.523	0.138	0.145	0.136	0.111	0.116	0.126	0.434	0.437	0.479	0.407	0.41	0.411	0.103	0.101	0.103	0.102	0.104	0.103	0.493	0.497	0.489	0.181	0.167	0.178	0.103	0.105	0.103	0.105	0.137	0.105
1 day, 8:40:00	30	0.479	0.474	0.476	0.452	0.455	0.454	0.433	0.444	0.433	0.432	0.436	0.443	0.127	0.12	0.13	0.5	0.493	0.52	0.139	0.147	0.135	0.111	0.115	0.128	0.433	0.434	0.479	0.406	0.41	0.41	0.103	0.101	0.103	0.102	0.104	0.102	0.492	0.497	0.489	0.183	0.172	0.18	0.103	0.105	0.103	0.105	0.137	0.106
1 day, 8:50:00	30	0.481	0.474	0.477	0.452	0.457	0.455	0.434	0.444	0.433	0.433	0.436	0.443	0.126	0.13	0.133	0.501	0.495	0.521	0.138	0.136	0.137	0.111	0.116	0.127	0.433	0.436	0.479	0.406	0.411	0.41	0.103	0.101	0.103	0.102	0.104	0.102	0.492	0.496	0.489	0.184	0.173	0.184	0.103	0.105	0.103	0.105	0.137	0.105
1 day, 9:00:00	30	0.478	0.475	0.477	0.453	0.455	0.455	0.431	0.443	0.434	0.433	0.436	0.443	0.128	0.123	0.122	0.502	0.494	0.52	0.154	0.145	0.137	0.111	0.116	0.118	0.433	0.432	0.475	0.408	0.408	0.414	0.103	0.101	0.103	0.102	0.104	0.102	0.494	0.497	0.489	0.184	0.171	0.185	0.103	0.105	0.103	0.105	0.137	0.105
1 day, 9:10:00	30	0.479	0.473	0.476	0.451	0.455	0.455	0.432	0.441	0.434	0.433	0.438	0.445	0.131	0.129	0.13	0.502	0.495	0.521	0.141	0.137	0.137	0.111	0.115	0.128	0.432	0.434	0.474	0.406	0.41	0.413	0.103	0.101	0.103	0.102	0.104	0.102	0.496	0.498	0.491	0.185	0.173	0.185	0.103	0.105	0.103	0.105	0.137	0.105
1 day, 9:20:00	30	0.479	0.476	0.478	0.452	0.455	0.454	0.432	0.444	0.434	0.433	0.438	0.444	0.126	0.13	0.134	0.503	0.494	0.522	0.156	0.145	0.138	0.112	0.116	0.124	0.434	0.432	0.475	0.41	0.412	0.412	0.103	0.101	0.103	0.102	0.104	0.103	0.494	0.499	0.492	0.186	0.178	0.188	0.103	0.105	0.103	0.105	0.137	0.106
1 day, 9:30:00	30	0.477	0.476	0.477	0.452	0.453	0.455	0.432	0.442	0.434	0.431	0.437	0.444	0.128	0.118	0.12	0.505	0.493	0.523	0.143	0.139	0.139	0.112	0.116	0.129	0.436	0.433	0.468	0.408	0.414	0.413	0.103	0.102	0.103	0.102	0.104	0.103	0.494	0.498	0.491	0.19	0.183	0.188	0.103	0.105	0.103	0.105	0.137	0.106
1 day, 9:40:00	30	0.475	0.477	0.476	0.452	0.455	0.456	0.433	0.441	0.437	0.432	0.438	0.444	0.132	0.117	0.12	0.504	0.497	0.522	0.151	0.148	0.139	0.112	0.116	0.128	0.433	0.432	0.469	0.407	0.41	0.412	0.103	0.101	0.103	0.102	0.104	0.102	0.494	0.498	0.489	0.192	0.183	0.19	0.103	0.105	0.103	0.105	0.137	0.105
1 day, 9:50:00	30	0.473	0.475	0.478	0.453	0.454	0.456	0.432	0.442	0.441	0.433	0.438	0.445	0.131	0.122	0.126	0.505	0.498	0.524	0.146	0.138	0.139	0.111	0.116	0.128	0.433	0.435	0.467	0.405	0.413	0.412	0.103	0.101	0.103	0.102	0.104	0.103	0.495	0.498	0.493	0.195	0.178	0.19	0.103	0.105	0.103	0.105	0.137	0.105
1 day, 10:00:00	30	0.474	0.475	0.477	0.452	0.454	0.455	0.43	0.442	0.437	0.434	0.438	0.446	0.133	0.117	0.127	0.507	0.497	0.525	0.144	0.144	0.139	0.112	0.116	0.127	0.432	0.434	0.467	0.408	0.413	0.411	0.103	0.102	0.103	0.102	0.104	0.103	0.495	0.498	0.492	0.196	0.18	0.192	0.103	0.105	0.103	0.105	0.137	0.106
1 day, 10:10:00	30	0.473	0.475	0.478	0.452	0.456	0.457	0.431	0.444	0.438	0.433	0.437	0.447	0.119	0.118	0.132	0.509	0.5	0.526	0.158	0.14	0.142	0.111	0.116	0.127	0.435	0.434	0.468	0.408	0.412	0.412	0.103	0.102	0.103	0.102	0.104	0.102	0.493	0.498	0.492	0.199	0.182	0.193	0.103	0.105	0.103	0.105	0.137	0.105
1 day, 10:20:00	30	0.473	0.473	0.478	0.453	0.454	0.455	0.431	0.442	0.437	0.433	0.441	0.447	0.13	0.119	0.129	0.509	0.499	0.526	0.144	0.147	0.14	0.111	0.116	0.128	0.436	0.436	0.468	0.407	0.411	0.41	0.103	0.101	0.103	0.102	0.104	0.103	0.494	0.501	0.491	0.199	0.184	0.194	0.103	0.105	0.103	0.105	0.137	0.105
1 day, 10:30:00	30	0.476	0.476	0.479	0.452	0.454	0.457	0.432	0.443	0.436	0.432	0.439	0.445	0.13	0.119	0.127	0.508	0.5	0.526	0.155	0.149	0.141	0.111	0.115	0.128	0.431	0.431	0.467	0.412	0.412	0.41	0.103	0.101	0.103	0.102	0.104	0.102	0.495	0.503	0.491	0.2	0.183	0.197	0.103	0.105	0.103	0.105	0.136	0.105
1 day, 10:40:00	30	0.477	0.478	0.482	0.456	0.455	0.456	0.431	0.443	0.437	0.435	0.439	0.445	0.124	0.117	0.135	0.51	0.499	0.527	0.145	0.148	0.142	0.112	0.116	0.128	0.432	0.432	0.467	0.414	0.414	0.408	0.103	0.101	0.103	0.102	0.104	0.102	0.496	0.504	0.493	0.203	0.186	0.195	0.103	0.105	0.103	0.105	0.137	0.106
1 day, 10:50:00	30	0.478	0.477	0.478	0.452	0.453	0.458	0.432	0.444	0.436	0.435	0.437	0.446	0.12	0.123	0.131	0.511	0.5	0.531	0.158	0.145	0.142	0.112	0.116	0.125	0.436	0.434	0.468	0.414	0.412	0.411	0.103	0.101	0.103	0.102	0.104	0.102	0.498	0.501	0.494	0.203	0.191	0.2	0.103	0.105	0.103	0.105	0.137	0.106
1 day, 11:00:00	30	0.477	0.477	0.479	0.453	0.454	0.457	0.431	0.444	0.436	0.434	0.439	0.448	0.128	0.118	0.123	0.511	0.501	0.529	0.145	0.144	0.143	0.112	0.116	0.129	0.434	0.434	0.468	0.416	0.411	0.41	0.103	0.101	0.103	0.102	0.104	0.102	0.496	0.503	0.495	0.205	0.19	0.2	0.103	0.105	0.103	0.105	0.137	0.106
1 day, 11:10:00	30	0.476	0.479	0.479	0.451	0.452	0.46	0.432	0.443	0.437	0.435	0.441	0.448	0.128	0.117	0.12	0.512	0.498	0.53	0.151	0.143	0.143	0.112	0.116	0.129	0.435	0.433	0.469	0.415	0.416	0.407	0.103	0.101	0.103	0.102	0.104	0.103	0.497	0.503	0.491	0.208	0.19	0.2	0.103	0.105	0.103	0.105	0.137	0.105
1 day, 11:20:00	30	0.477	0.479	0.48	0.453	0.452	0.459	0.431	0.444	0.438	0.431	0.438	0.448	0.135	0.131	0.124	0.513	0.5	0.534	0.157	0.144	0.143	0.112	0.117	0.126	0.433	0.434	0.468	0.417	0.414	0.41	0.103	0.102	0.103	0.102	0.104	0.103	0.498	0.504	0.491	0.207	0.193	0.2	0.103	0.105	0.103	0.105	0.137	0.105
1 day, 11:30:00	30	0.477	0.479	0.481	0.454	0.454	0.457	0.431	0.444	0.441	0.431	0.441	0.448	0.128	0.119	0.133	0.514	0.501	0.531	0.147	0.144	0.145	0.112	0.115	0.129	0.433	0.432	0.469	0.416	0.413	0.412	0.103	0.101	0.103	0.102	0.104	0.102	0.499	0.507	0.493	0.21	0.193	0.202	0.103	0.105	0.103	0.105	0.137	0.105
1 day, 11:40:00	30	0.477	0.478	0.48	0.452	0.455	0.46	0.433	0.445	0.44	0.434	0.441	0.449	0.136	0.12	0.124	0.516	0.501	0.534	0.153	0.144	0.145	0.111	0.117	0.127	0.432	0.432	0.471	0.416	0.414	0.41	0.103	0.101	0.103	0.102	0.104	0.103	0.499	0.507	0.496	0.21	0.195	0.205	0.103	0.105	0.103	0.104	0.137	0.105
1 day, 11:50:00	30	0.476	0.48	0.481	0.454	0.454	0.46	0.433	0.446	0.439	0.433	0.441	0.447	0.132	0.118	0.132	0.513	0.499	0.532	0.148	0.145	0.145	0.112	0.116	0.131	0.433	0.434	0.471	0.418	0.414	0.411	0.103	0.102	0.103	0.102	0.104	0.103	0.499	0.506	0.496	0.211	0.197	0.207	0.103	0.105	0.103	0.105	0.137	0.106
1 day, 12:00:00	30	0.478	0.48	0.479	0.453	0.455	0.459	0.433	0.444	0.437	0.433	0.439	0.448	0.133	0.124	0.12	0.513	0.5	0.534	0.155	0.144	0.144	0.112	0.117	0.132	0.433	0.432	0.469	0.418	0.415	0.412	0.103	0.102	0.103	0.102	0.104	0.103	0.501	0.506	0.496	0.213	0.198	0.206	0.103	0.105	0.103	0.105	0.137	0.105
1 day, 12:10:00	30	0.474	0.481	0.479	0.452	0.455	0.46	0.432	0.446	0.438	0.436	0.441	0.448	0.129	0.118	0.137	0.513	0.502	0.532	0.164	0.146	0.146	0.111	0.117	0.127	0.431	0.433	0.47	0.421	0.412	0.412	0.103	0.102	0.103	0.102	0.104	0.103	0.501	0.507	0.495	0.21	0.201	0.209	0.103	0.105	0.103	0.105	0.137	0.106
1 day, 12:20:00	30	0.476	0.48	0.48	0.454	0.456	0.459	0.433	0.445	0.432	0.437	0.441	0.45	0.133	0.119	0.123	0.512	0.501	0.535	0.153	0.145	0.146	0.112	0.116	0.128	0.434	0.433	0.471	0.418	0.413	0.412	0.103	0.102	0.103	0.102	0.104	0.103	0.499	0.505	0.497	0.211	0.203	0.209	0.103	0.105	0.103	0.105	0.137	0.105
1 day, 12:30:00	30	0.477	0.478	0.479	0.453	0.454	0.46	0.433	0.445	0.435	0.432	0.441	0.449	0.128	0.124	0.121	0.514	0.502	0.537	0.152	0.145	0.146	0.112	0.117	0.132	0.434	0.435	0.472	0.42	0.411	0.413	0.103	0.102	0.103	0.102	0.104	0.103	0.502	0.506	0.497	0.214	0.205	0.212	0.103	0.105	0.103	0.105	0.137	0.106
1 day, 12:40:00	30	0.475	0.479	0.479	0.452	0.454	0.46	0.432	0.445	0.434	0.436	0.442	0.447	0.121	0.133	0.12	0.512	0.504	0.535	0.152	0.146	0.147	0.112	0.117	0.132	0.431	0.436	0.473	0.421	0.411	0.412	0.103	0.102	0.103	0.102	0.104	0.103	0.501	0.505	0.495	0.214	0.207	0.216	0.103	0.105	0.103	0.105	0.137	0.106
1 day, 12:50:00	30	0.474	0.479	0.482	0.453	0.454	0.461	0.434	0.444	0.435	0.439	0.442	0.448	0.132	0.123	0.135	0.515	0.503	0.539	0.154	0.147	0.148	0.112	0.116	0.13	0.431	0.436	0.475	0.417	0.411	0.413	0.103	0.102	0.103	0.102	0.104	0.103	0.5	0.505	0.498	0.218	0.211	0.217	0.103	0.105	0.103	0.105	0.137	0.106
1 day, 13:00:00	30	0.475	0.477	0.479	0.454	0.456	0.46	0.434	0.445	0.435	0.436	0.443	0.448	0.127	0.118	0.121	0.515	0.501	0.539	0.154	0.146	0.148	0.112	0.116	0.129	0.435	0.431	0.476	0.417	0.412	0.412	0.103	0.102	0.103	0.102	0.104	0.103	0.502	0.504	0.499	0.219	0.21	0.216	0.103	0.105	0.103	0.105	0.137	0.105
1 day, 13:10:00	30	0.474	0.478	0.479	0.453	0.456	0.461	0.435	0.446	0.435	0.434	0.441	0.449	0.134	0.117	0.122	0.514	0.501	0.543	0.155	0.148	0.149	0.112	0.117	0.13	0.434	0.436	0.475	0.419	0.413	0.413	0.103	0.102	0.103	0.102	0.104	0.103	0.502	0.506	0.496	0.22	0.211	0.219	0.103	0.105	0.103	0.105	0.137	0.106
1 day, 13:20:00	30	0.472	0.476	0.479	0.453	0.456	0.458	0.436	0.447	0.437	0.436	0.443	0.449	0.138	0.118	0.121	0.516	0.503	0.542	0.154	0.149	0.151	0.112	0.117	0.133	0.435	0.433	0.478	0.413	0.413	0.413	0.103	0.102	0.103	0.102	0.104	0.103	0.503	0.508	0.499	0.222	0.215	0.218	0.103	0.105	0.103	0.105	0.137	0.106
1 day, 13:30:00	30	0.47	0.476	0.479	0.454	0.457	0.459	0.434	0.446	0.438	0.44	0.441	0.447	0.136	0.125	0.131	0.515	0.504	0.545	0.154	0.149	0.151	0.112	0.116	0.132	0.434	0.433	0.477	0.411	0.413	0.414	0.103	0.102	0.103	0.102	0.104	0.103	0.503	0.507	0.496	0.221	0.213	0.219	0.103	0.105	0.103	0.105	0.137	0.105
1 day, 13:40:00	30	0.472	0.476	0.478	0.454	0.456	0.46	0.433	0.447	0.44	0.441	0.442	0.45	0.133	0.132	0.12	0.514	0.504	0.543	0.155	0.148	0.151	0.112	0.117	0.133	0.435	0.432	0.477	0.41	0.412	0.415	0.103	0.102	0.103	0.102	0.104	0.103	0.504	0.508	0.497	0.224	0.219	0.222	0.103	0.105	0.103	0.105	0.137	0.106
1 day, 13:50:00	30.1	0.471	0.475	0.477	0.453	0.456	0.458	0.434	0.448	0.438	0.44	0.444	0.448	0.133	0.131	0.121	0.515	0.502	0.542	0.155	0.15	0.151	0.112	0.117	0.13	0.437	0.432	0.477	0.411	0.418	0.415	0.103	0.102	0.103	0.102	0.104	0.103	0.504	0.507	0.496	0.225	0.217	0.223	0.103	0.105	0.103	0.105	0.137	0.106
1 day, 14:00:00	30	0.473	0.475	0.476	0.453	0.458	0.462	0.436	0.446	0.439	0.441	0.443	0.449	0.132	0.131	0.138	0.516	0.507	0.539	0.156	0.149	0.152	0.112	0.118	0.133	0.436	0.431	0.478	0.411	0.417	0.416	0.103	0.102	0.103	0.102	0.104	0.103	0.504	0.509	0.499	0.225	0.22	0.223	0.103	0.105	0.103	0.105	0.137	0.106
1 day, 14:10:00	30	0.473	0.474	0.478	0.453	0.456	0.462	0.436	0.445	0.44	0.441	0.444	0.45	0.135	0.136	0.129	0.518	0.508	0.541	0.158	0.15	0.153	0.112	0.117	0.131	0.436	0.432	0.479	0.411	0.414	0.416	0.103	0.102	0.103	0.102	0.104	0.103	0.503	0.507	0.497	0.227	0.22	0.222	0.103	0.105	0.103	0.105	0.137	0.106
1 day, 14:20:00	30	0.473	0.474	0.478	0.456	0.458	0.461	0.437	0.449	0.439	0.441	0.444	0.447	0.124	0.134	0.122	0.518	0.505	0.542	0.161	0.151	0.154	0.112	0.117	0.132	0.439	0.432	0.48	0.413	0.416	0.416	0.103	0.102	0.103	0.102	0.104	0.103	0.505	0.508	0.498	0.227	0.222	0.223	0.103	0.105	0.103	0.105	0.137	0.105
1 day, 14:30:00	30	0.473	0.477	0.477	0.454	0.456	0.462	0.434	0.449	0.44	0.443	0.445	0.449	0.124	0.121	0.133	0.519	0.506	0.54	0.158	0.152	0.154	0.112	0.117	0.132	0.438	0.432	0.477	0.415	0.416	0.416	0.103	0.102	0.103	0.102	0.104	0.103	0.506	0.509	0.499	0.228	0.23	0.223	0.103	0.105	0.103	0.105	0.137	0.106
1 day, 14:40:00	30	0.473	0.476	0.478	0.454	0.457	0.461	0.435	0.449	0.439	0.44	0.445	0.449	0.135	0.127	0.122	0.52	0.506	0.54	0.159	0.152	0.155	0.111	0.117	0.13	0.436	0.432	0.479	0.416	0.416	0.415	0.103	0.102	0.103	0.102	0.104	0.103	0.502	0.506	0.5	0.23	0.226	0.227	0.103	0.105	0.103	0.105	0.137	0.105
1 day, 14:50:00	30	0.472	0.478	0.478	0.457	0.457	0.463	0.436	0.45	0.441	0.441	0.445	0.449	0.132	0.122	0.125	0.521	0.508	0.542	0.159	0.153	0.156	0.112	0.117	0.132	0.436	0.43	0.481	0.416	0.417	0.418	0.103	0.102	0.103	0.102	0.104	0.103	0.508	0.51	0.5	0.232	0.231	0.228	0.103	0.105	0.103	0.105	0.137	0.105
1 day, 15:00:00	30	0.472	0.475	0.477	0.456	0.457	0.463	0.435	0.447	0.439	0.44	0.444	0.449	0.138	0.12	0.136	0.519	0.507	0.542	0.159	0.154	0.157	0.112	0.117	0.136	0.434	0.432	0.48	0.416	0.417	0.418	0.103	0.102	0.103	0.102	0.104	0.103	0.506	0.508	0.502	0.235	0.235	0.23	0.103	0.105	0.103	0.105	0.137	0.106
1 day, 15:10:00	30	0.474	0.476	0.479	0.455	0.456	0.463	0.437	0.448	0.441	0.442	0.445	0.449	0.126	0.122	0.122	0.522	0.51	0.543	0.16	0.154	0.157	0.111	0.118	0.127	0.433	0.432	0.482	0.417	0.418	0.416	0.103	0.102	0.103	0.102	0.104	0.103	0.507	0.509	0.502	0.237	0.233	0.233	0.103	0.105	0.103	0.105	0.137	0.105
1 day, 15:20:00	30	0.474	0.475	0.48	0.454	0.458	0.463	0.438	0.447	0.44	0.444	0.443	0.45	0.129	0.121	0.133	0.519	0.508	0.544	0.162	0.155	0.158	0.111	0.117	0.135	0.433	0.43	0.481	0.416	0.415	0.417	0.103	0.102	0.103	0.102	0.104	0.103	0.506	0.51	0.501	0.239	0.24	0.236	0.103	0.105	0.104	0.105	0.137	0.106
1 day, 15:30:00	30	0.476	0.476	0.479	0.455	0.456	0.466	0.436	0.45	0.44	0.443	0.444	0.449	0.133	0.134	0.135	0.522	0.51	0.544	0.161	0.155	0.158	0.112	0.118	0.13	0.432	0.428	0.482	0.417	0.416	0.417	0.103	0.102	0.103	0.102	0.104	0.103	0.508	0.508	0.502	0.237	0.235	0.239	0.103	0.105	0.103	0.105	0.137	0.105
1 day, 15:40:00	30	0.474	0.474	0.477	0.457	0.456	0.465	0.438	0.448	0.441	0.445	0.445	0.45	0.127	0.119	0.135	0.524	0.51	0.546	0.161	0.155	0.159	0.112	0.118	0.133	0.432	0.431	0.482	0.419	0.418	0.418	0.103	0.102	0.103	0.102	0.104	0.103	0.509	0.508	0.503	0.24	0.241	0.24	0.103	0.105	0.103	0.105	0.137	0.106
1 day, 15:50:00	30	0.476	0.474	0.477	0.457	0.459	0.465	0.439	0.449	0.44	0.446	0.444	0.45	0.121	0.119	0.141	0.523	0.51	0.548	0.164	0.158	0.16	0.112	0.118	0.137	0.431	0.432	0.485	0.416	0.419	0.415	0.103	0.102	0.103	0.102	0.104	0.103	0.509	0.507	0.503	0.24	0.241	0.242	0.103	0.105	0.103	0.105	0.137	0.105
1 day, 16:00:00	30	0.473	0.475	0.479	0.457	0.457	0.465	0.439	0.448	0.443	0.443	0.445	0.449	0.139	0.135	0.134	0.521	0.509	0.547	0.161	0.157	0.164	0.112	0.118	0.135	0.434	0.434	0.484	0.415	0.417	0.415	0.103	0.102	0.103	0.102	0.104	0.103	0.507	0.51	0.501	0.245	0.247	0.245	0.103	0.105	0.103	0.105	0.137	0.105
1 day, 16:10:00	30	0.477	0.477	0.48	0.456	0.457	0.465	0.44	0.451	0.443	0.442	0.447	0.449	0.122	0.125	0.135	0.523	0.51	0.549	0.164	0.158	0.161	0.112	0.118	0.138	0.436	0.435	0.483	0.417	0.418	0.415	0.103	0.102	0.103	0.102	0.104	0.103	0.507	0.509	0.503	0.247	0.247	0.249	0.103	0.105	0.104	0.105	0.137	0.106
1 day, 16:20:00	30	0.476	0.473	0.479	0.457	0.457	0.466	0.439	0.451	0.444	0.444	0.446	0.451	0.138	0.128	0.134	0.523	0.512	0.55	0.164	0.159	0.161	0.112	0.118	0.136	0.434	0.435	0.485	0.415	0.418	0.416	0.103	0.102	0.103	0.102	0.104	0.103	0.508	0.506	0.501	0.25	0.248	0.251	0.103	0.105	0.103	0.105	0.137	0.106
1 day, 16:30:00	30	0.473	0.477	0.48	0.457	0.457	0.466	0.438	0.45	0.443	0.444	0.446	0.451	0.13	0.119	0.129	0.526	0.51	0.552	0.165	0.161	0.162	0.112	0.118	0.138	0.435	0.436	0.484	0.419	0.419	0.415	0.103	0.102	0.103	0.102	0.104	0.103	0.507	0.51	0.503	0.253	0.251	0.254	0.103	0.105	0.103	0.105	0.137	0.106
1 day, 16:40:00	30	0.472	0.475	0.479	0.459	0.456	0.465	0.438	0.451	0.445	0.446	0.446	0.45	0.141	0.121	0.135	0.526	0.511	0.554	0.166	0.16	0.163	0.112	0.117	0.138	0.436	0.438	0.485	0.415	0.419	0.413	0.103	0.102	0.103	0.102	0.104	0.103	0.505	0.509	0.501	0.251	0.251	0.256	0.103	0.105	0.103	0.105	0.137	0.106
1 day, 16:50:00	30.1	0.471	0.477	0.48	0.458	0.456	0.464	0.439	0.448	0.445	0.446	0.448	0.452	0.132	0.131	0.139	0.524	0.51	0.552	0.168	0.162	0.164	0.112	0.118	0.14	0.434	0.438	0.484	0.417	0.417	0.415	0.103	0.102	0.103	0.102	0.104	0.103	0.503	0.51	0.499	0.254	0.257	0.258	0.103	0.105	0.103	0.105	0.137	0.106
1 day, 17:00:00	30.1	0.472	0.475	0.478	0.459	0.458	0.463	0.438	0.447	0.446	0.445	0.448	0.451	0.138	0.122	0.137	0.525	0.509	0.552	0.169	0.161	0.164	0.112	0.117	0.137	0.435	0.436	0.485	0.418	0.419	0.415	0.103	0.102	0.103	0.102	0.104	0.103	0.506	0.51	0.5	0.255	0.253	0.262	0.103	0.105	0.103	0.105	0.137	0.106
1 day, 17:10:00	30.1	0.472	0.476	0.481	0.457	0.455	0.463	0.439	0.448	0.443	0.448	0.447	0.451	0.123	0.123	0.141	0.526	0.511	0.555	0.169	0.163	0.165	0.112	0.118	0.138	0.435	0.436	0.484	0.419	0.418	0.416	0.103	0.102	0.103	0.102	0.104	0.103	0.504	0.508	0.502	0.257	0.256	0.263	0.103	0.105	0.103	0.105	0.137	0.106
1 day, 17:20:00	30.1	0.474	0.476	0.479	0.458	0.456	0.465	0.44	0.449	0.443	0.448	0.449	0.451	0.127	0.132	0.13	0.526	0.509	0.555	0.169	0.163	0.167	0.112	0.119	0.14	0.435	0.436	0.486	0.418	0.417	0.416	0.103	0.102	0.103	0.102	0.104	0.103	0.509	0.507	0.502	0.258	0.257	0.267	0.103	0.105	0.103	0.105	0.137	0.106
1 day, 17:30:00	30.2	0.473	0.476	0.48	0.459	0.458	0.464	0.439	0.45	0.444	0.446	0.446	0.452	0.121	0.121	0.123	0.525	0.51	0.553	0.171	0.163	0.167	0.112	0.118	0.141	0.434	0.437	0.484	0.419	0.417	0.415	0.103	0.102	0.103	0.102	0.104	0.103	0.504	0.511	0.504	0.26	0.259	0.268	0.103	0.105	0.104	0.105	0.137	0.106
1 day, 17:40:00	30.2	0.474	0.478	0.481	0.459	0.458	0.466	0.44	0.45	0.444	0.448	0.449	0.451	0.137	0.137	0.139	0.526	0.513	0.556	0.171	0.163	0.166	0.111	0.118	0.139	0.434	0.436	0.487	0.417	0.417	0.414	0.103	0.102	0.103	0.102	0.104	0.103	0.507	0.509	0.504	0.262	0.263	0.271	0.103	0.105	0.103	0.105	0.137	0.105
1 day, 17:50:00	30.2	0.474	0.477	0.481	0.459	0.457	0.466	0.441	0.45	0.447	0.448	0.447	0.452	0.131	0.14	0.132	0.527	0.513	0.559	0.173	0.163	0.168	0.112	0.118	0.14	0.433	0.437	0.484	0.416	0.417	0.414	0.103	0.102	0.103	0.102	0.104	0.103	0.506	0.509	0.505	0.264	0.267	0.272	0.103	0.105	0.103	0.105	0.137	0.106
1 day, 18:00:00	30.2	0.475	0.478	0.481	0.459	0.458	0.466	0.44	0.452	0.445	0.451	0.449	0.45	0.13	0.134	0.139	0.525	0.514	0.557	0.174	0.166	0.168	0.112	0.118	0.141	0.431	0.438	0.484	0.416	0.418	0.415	0.103	0.102	0.103	0.102	0.104	0.103	0.509	0.511	0.509	0.268	0.266	0.273	0.103	0.105	0.103	0.105	0.137	0.105
1 day, 18:10:00	30.2	0.475	0.478	0.48	0.46	0.459	0.466	0.441	0.453	0.446	0.451	0.448	0.453	0.129	0.137	0.126	0.526	0.515	0.559	0.175	0.166	0.169	0.112	0.118	0.142	0.433	0.437	0.485	0.418	0.416	0.415	0.103	0.102	0.103	0.102	0.104	0.103	0.513	0.512	0.507	0.27	0.273	0.277	0.103	0.105	0.103	0.105	0.137	0.106
1 day, 18:20:00	30.3	0.474	0.477	0.481	0.459	0.458	0.466	0.443	0.452	0.447	0.454	0.448	0.452	0.141	0.128	0.143	0.528	0.518	0.559	0.175	0.166	0.171	0.111	0.118	0.141	0.434	0.436	0.483	0.42	0.416	0.416	0.103	0.102	0.103	0.102	0.104	0.103	0.511	0.511	0.506	0.271	0.271	0.28	0.103	0.105	0.103	0.105	0.137	0.105
1 day, 18:30:00	30.3	0.474	0.478	0.482	0.458	0.457	0.465	0.44	0.451	0.446	0.452	0.448	0.451	0.138	0.118	0.128	0.527	0.518	0.56	0.176	0.168	0.171	0.112	0.118	0.142	0.434	0.437	0.485	0.419	0.416	0.413	0.103	0.102	0.103	0.102	0.104	0.103	0.51	0.51	0.506	0.274	0.274	0.281	0.103	0.105	0.103	0.105	0.137	0.105
1 day, 18:40:00	30.4	0.477	0.478	0.48	0.461	0.457	0.465	0.443	0.454	0.448	0.447	0.449	0.453	0.142	0.127	0.143	0.527	0.519	0.562	0.176	0.168	0.172	0.111	0.118	0.135	0.433	0.438	0.485	0.42	0.416	0.412	0.103	0.102	0.103	0.102	0.104	0.103	0.511	0.512	0.507	0.275	0.277	0.284	0.103	0.105	0.103	0.105	0.137	0.106
1 day, 18:50:00	30.4	0.478	0.477	0.481	0.458	0.459	0.466	0.442	0.454	0.446	0.446	0.447	0.452	0.127	0.131	0.142	0.527	0.521	0.562	0.179	0.169	0.172	0.112	0.12	0.142	0.432	0.436	0.483	0.42	0.416	0.413	0.103	0.102	0.103	0.102	0.104	0.103	0.509	0.508	0.511	0.279	0.278	0.285	0.103	0.105	0.103	0.105	0.137	0.105
1 day, 19:00:00	30.4	0.476	0.476	0.482	0.459	0.46	0.467	0.442	0.453	0.447	0.447	0.448	0.452	0.126	0.123	0.128	0.528	0.52	0.563	0.179	0.171	0.175	0.111	0.117	0.139	0.433	0.439	0.484	0.419	0.416	0.413	0.103	0.102	0.103	0.102	0.104	0.103	0.509	0.51	0.511	0.282	0.284	0.289	0.103	0.105	0.103	0.105	0.137	0.106
1 day, 19:10:00	30.4	0.476	0.479	0.482	0.458	0.461	0.468	0.445	0.453	0.445	0.448	0.448	0.451	0.14	0.126	0.125	0.528	0.519	0.563	0.181	0.17	0.175	0.112	0.12	0.138	0.431	0.438	0.483	0.418	0.415	0.414	0.103	0.102	0.103	0.102	0.104	0.103	0.514	0.51	0.509	0.285	0.281	0.29	0.103	0.105	0.103	0.105	0.137	0.106
1 day, 19:20:00	30.4	0.474	0.48	0.482	0.459	0.461	0.468	0.445	0.455	0.447	0.448	0.448	0.452	0.14	0.131	0.122	0.53	0.516	0.562	0.181	0.173	0.176	0.112	0.117	0.14	0.431	0.436	0.485	0.419	0.417	0.412	0.103	0.102	0.103	0.102	0.104	0.103	0.511	0.509	0.511	0.286	0.281	0.291	0.103	0.105	0.103	0.105	0.137	0.106
1 day, 19:30:00	30.4	0.475	0.48	0.483	0.459	0.459	0.467	0.444	0.456	0.448	0.447	0.446	0.454	0.14	0.127	0.134	0.529	0.519	0.563	0.181	0.172	0.176	0.112	0.118	0.142	0.431	0.437	0.485	0.418	0.416	0.414	0.103	0.102	0.103	0.102	0.104	0.103	0.511	0.511	0.511	0.288	0.286	0.294	0.103	0.105	0.103	0.104	0.137	0.106
1 day, 19:40:00	30.4	0.477	0.478	0.482	0.46	0.46	0.469	0.444	0.456	0.447	0.446	0.446	0.453	0.131	0.139	0.128	0.528	0.518	0.562	0.182	0.173	0.176	0.112	0.118	0.145	0.431	0.436	0.485	0.419	0.414	0.413	0.103	0.102	0.103	0.102	0.104	0.103	0.513	0.507	0.512	0.293	0.286	0.294	0.103	0.105	0.103	0.105	0.137	0.106
1 day, 19:50:00	30.4	0.477	0.48	0.482	0.462	0.462	0.469	0.444	0.455	0.446	0.446	0.448	0.454	0.131	0.124	0.146	0.531	0.519	0.562	0.183	0.175	0.176	0.112	0.119	0.146	0.43	0.436	0.483	0.419	0.415	0.414	0.103	0.102	0.103	0.102	0.104	0.103	0.512	0.505	0.511	0.296	0.288	0.297	0.103	0.105	0.103	0.105	0.137	0.106
1 day, 20:00:00	30.4	0.477	0.48	0.481	0.461	0.46	0.467	0.444	0.457	0.447	0.451	0.447	0.455	0.138	0.119	0.121	0.532	0.518	0.563	0.184	0.175	0.18	0.112	0.118	0.141	0.433	0.436	0.482	0.419	0.416	0.413	0.103	0.102	0.103	0.102	0.104	0.102	0.512	0.505	0.513	0.297	0.29	0.301	0.103	0.105	0.103	0.105	0.137	0.106
1 day, 20:10:00	30.4	0.478	0.48	0.484	0.464	0.462	0.467	0.444	0.457	0.444	0.45	0.447	0.451	0.138	0.137	0.14	0.532	0.52	0.562	0.185	0.175	0.179	0.111	0.117	0.145	0.433	0.437	0.484	0.42	0.417	0.415	0.103	0.102	0.103	0.102	0.104	0.103	0.513	0.506	0.511	0.299	0.293	0.302	0.103	0.105	0.103	0.105	0.137	0.105
1 day, 20:20:00	30.4	0.479	0.479	0.484	0.46	0.462	0.466	0.444	0.455	0.445	0.446	0.449	0.452	0.131	0.121	0.134	0.533	0.523	0.568	0.186	0.178	0.178	0.111	0.117	0.139	0.432	0.437	0.483	0.418	0.416	0.415	0.103	0.102	0.103	0.102	0.104	0.103	0.515	0.509	0.512	0.301	0.3	0.304	0.103	0.105	0.103	0.105	0.137	0.105
1 day, 20:30:00	30.4	0.477	0.478	0.483	0.459	0.462	0.467	0.446	0.456	0.444	0.448	0.447	0.456	0.126	0.141	0.121	0.53	0.523	0.566	0.186	0.177	0.181	0.112	0.118	0.133	0.434	0.436	0.485	0.417	0.416	0.415	0.103	0.102	0.103	0.102	0.104	0.103	0.515	0.51	0.514	0.303	0.298	0.307	0.103	0.105	0.103	0.105	0.137	0.105
1 day, 20:40:00	30.4	0.476	0.479	0.482	0.461	0.464	0.467	0.445	0.455	0.445	0.451	0.448	0.455	0.124	0.134	0.124	0.532	0.523	0.565	0.189	0.177	0.182	0.112	0.117	0.139	0.434	0.435	0.483	0.418	0.417	0.416	0.103	0.102	0.103	0.102	0.104	0.103	0.514	0.51	0.512	0.304	0.297	0.308	0.103	0.105	0.103	0.105	0.137	0.106
1 day, 20:50:00	30.4	0.478	0.479	0.483	0.464	0.462	0.464	0.446	0.455	0.446	0.448	0.448	0.455	0.141	0.119	0.123	0.532	0.524	0.567	0.189	0.178	0.183	0.111	0.118	0.145	0.432	0.436	0.483	0.419	0.415	0.417	0.103	0.102	0.103	0.102	0.104	0.103	0.515	0.512	0.511	0.309	0.3	0.309	0.103	0.105	0.103	0.105	0.137	0.106
1 day, 21:00:00	30.5	0.478	0.479	0.484	0.461	0.463	0.465	0.446	0.454	0.446	0.449	0.448	0.453	0.143	0.135	0.131	0.53	0.524	0.568	0.189	0.178	0.181	0.111	0.119	0.142	0.432	0.436	0.482	0.418	0.416	0.416	0.103	0.102	0.103	0.102	0.104	0.102	0.514	0.513	0.512	0.311	0.3	0.312	0.103	0.105	0.103	0.105	0.137	0.105
1 day, 21:10:00	30.5	0.478	0.48	0.484	0.462	0.464	0.466	0.447	0.456	0.445	0.45	0.449	0.454	0.132	0.12	0.128	0.532	0.525	0.568	0.191	0.18	0.183	0.111	0.119	0.142	0.434	0.437	0.483	0.419	0.418	0.415	0.103	0.102	0.103	0.102	0.104	0.103	0.514	0.512	0.512	0.311	0.305	0.314	0.103	0.105	0.103	0.105	0.137	0.106
1 day, 21:20:00	30.5	0.48	0.478	0.485	0.461	0.462	0.464	0.448	0.455	0.445	0.446	0.448	0.453	0.127	0.125	0.126	0.532	0.525	0.566	0.193	0.181	0.185	0.111	0.123	0.147	0.434	0.435	0.482	0.419	0.417	0.417	0.103	0.102	0.103	0.102	0.104	0.102	0.512	0.515	0.514	0.314	0.303	0.315	0.103	0.105	0.103	0.104	0.137	0.105
1 day, 21:30:00	30.5	0.479	0.481	0.484	0.462	0.461	0.465	0.448	0.456	0.441	0.443	0.449	0.453	0.142	0.128	0.129	0.534	0.526	0.569	0.192	0.182	0.184	0.112	0.12	0.138	0.433	0.437	0.485	0.418	0.415	0.415	0.103	0.102	0.103	0.102	0.104	0.103	0.513	0.517	0.512	0.315	0.307	0.314	0.103	0.105	0.103	0.105	0.137	0.106
1 day, 21:40:00	30.5	0.478	0.479	0.483	0.46	0.46	0.467	0.448	0.454	0.442	0.449	0.448	0.454	0.14	0.131	0.13	0.533	0.526	0.568	0.194	0.183	0.184	0.112	0.119	0.145	0.434	0.436	0.482	0.419	0.417	0.418	0.103	0.102	0.103	0.102	0.104	0.103	0.514	0.514	0.513	0.315	0.307	0.319	0.103	0.105	0.103	0.105	0.137	0.105
1 day, 21:50:00	30.5	0.48	0.481	0.483	0.464	0.459	0.465	0.447	0.456	0.439	0.443	0.449	0.454	0.135	0.143	0.125	0.535	0.526	0.568	0.193	0.182	0.186	0.111	0.12	0.149	0.435	0.437	0.483	0.419	0.418	0.419	0.103	0.102	0.103	0.102	0.104	0.103	0.513	0.519	0.515	0.32	0.312	0.321	0.103	0.105	0.103	0.105	0.137	0.106
1 day, 22:00:00	30.5	0.48	0.482	0.484	0.461	0.464	0.468	0.447	0.453	0.442	0.441	0.45	0.454	0.143	0.127	0.126	0.533	0.528	0.567	0.195	0.184	0.187	0.112	0.12	0.144	0.437	0.438	0.482	0.418	0.418	0.419	0.103	0.102	0.103	0.102	0.104	0.103	0.512	0.517	0.516	0.32	0.31	0.321	0.103	0.105	0.103	0.105	0.137	0.105
1 day, 22:10:00	30.5	0.48	0.48	0.485	0.461	0.461	0.466	0.447	0.452	0.44	0.446	0.449	0.454	0.135	0.136	0.129	0.533	0.529	0.568	0.195	0.186	0.189	0.112	0.12	0.138	0.435	0.436	0.483	0.418	0.418	0.42	0.103	0.102	0.103	0.102	0.104	0.103	0.513	0.516	0.516	0.322	0.317	0.325	0.103	0.105	0.103	0.105	0.137	0.106
1 day, 22:20:00	30.5	0.478	0.479	0.483	0.464	0.461	0.47	0.445	0.452	0.444	0.437	0.448	0.454	0.135	0.123	0.125	0.531	0.528	0.56	0.196	0.185	0.188	0.111	0.127	0.149	0.434	0.438	0.484	0.42	0.417	0.419	0.103	0.102	0.103	0.102	0.104	0.103	0.514	0.517	0.516	0.325	0.314	0.328	0.103	0.105	0.103	0.105	0.137	0.106
1 day, 22:30:00	30.5	0.481	0.482	0.484	0.465	0.46	0.468	0.446	0.453	0.443	0.445	0.448	0.453	0.14	0.134	0.142	0.533	0.53	0.566	0.198	0.186	0.191	0.112	0.129	0.147	0.435	0.437	0.482	0.419	0.419	0.42	0.103	0.102	0.103	0.102	0.104	0.103	0.514	0.517	0.514	0.325	0.316	0.328	0.103	0.105	0.103	0.105	0.137	0.106
1 day, 22:40:00	30.5	0.479	0.481	0.485	0.465	0.461	0.471	0.446	0.45	0.442	0.441	0.447	0.45	0.143	0.122	0.145	0.534	0.531	0.557	0.199	0.188	0.189	0.111	0.125	0.141	0.438	0.44	0.482	0.42	0.418	0.418	0.103	0.102	0.103	0.102	0.104	0.103	0.512	0.519	0.515	0.328	0.316	0.334	0.103	0.105	0.103	0.105	0.137	0.106
1 day, 22:50:00	30.5	0.48	0.482	0.485	0.463	0.462	0.47	0.448	0.451	0.439	0.449	0.447	0.451	0.131	0.126	0.139	0.534	0.531	0.56	0.199	0.188	0.19	0.112	0.125	0.149	0.435	0.439	0.481	0.418	0.419	0.42	0.103	0.102	0.103	0.102	0.104	0.103	0.513	0.518	0.516	0.331	0.318	0.337	0.103	0.105	0.104	0.105	0.137	0.106
1 day, 23:00:00	30.5	0.48	0.481	0.485	0.462	0.46	0.469	0.447	0.451	0.442	0.446	0.449	0.451	0.125	0.139	0.122	0.535	0.532	0.559	0.202	0.188	0.192	0.112	0.128	0.148	0.437	0.438	0.483	0.421	0.42	0.421	0.103	0.102	0.103	0.102	0.104	0.103	0.512	0.52	0.515	0.33	0.322	0.339	0.103	0.105	0.103	0.105	0.137	0.106
1 day, 23:10:00	30.5	0.482	0.479	0.486	0.464	0.462	0.469	0.448	0.451	0.441	0.45	0.448	0.453	0.129	0.128	0.124	0.535	0.533	0.559	0.203	0.19	0.192	0.112	0.126	0.148	0.436	0.438	0.484	0.42	0.419	0.421	0.103	0.102	0.103	0.102	0.104	0.103	0.512	0.517	0.516	0.336	0.323	0.34	0.103	0.105	0.103	0.105	0.137	0.106
1 day, 23:20:00	30.5	0.482	0.482	0.486	0.464	0.463	0.47	0.445	0.451	0.442	0.452	0.448	0.454	0.137	0.121	0.135	0.535	0.534	0.558	0.204	0.19	0.194	0.112	0.133	0.15	0.437	0.439	0.484	0.421	0.42	0.421	0.103	0.102	0.103	0.102	0.104	0.102	0.513	0.518	0.516	0.334	0.323	0.343	0.103	0.105	0.103	0.105	0.137	0.106
1 day, 23:30:00	30.5	0.48	0.482	0.485	0.464	0.461	0.468	0.446	0.45	0.444	0.45	0.448	0.453	0.135	0.134	0.14	0.535	0.535	0.561	0.205	0.193	0.193	0.112	0.127	0.149	0.438	0.438	0.483	0.422	0.422	0.421	0.103	0.102	0.103	0.102	0.104	0.102	0.513	0.516	0.516	0.337	0.327	0.344	0.103	0.105	0.103	0.105	0.137	0.105
1 day, 23:40:00	30.5	0.482	0.482	0.486	0.463	0.461	0.472	0.444	0.453	0.443	0.449	0.448	0.452	0.133	0.135	0.135	0.535	0.531	0.556	0.208	0.192	0.195	0.111	0.128	0.151	0.437	0.438	0.483	0.423	0.42	0.422	0.103	0.102	0.103	0.102	0.104	0.102	0.513	0.517	0.517	0.339	0.327	0.342	0.103	0.105	0.103	0.105	0.137	0.106
1 day, 23:50:00	30.5	0.48	0.482	0.487	0.465	0.463	0.47	0.446	0.453	0.445	0.453	0.446	0.453	0.137	0.123	0.138	0.538	0.533	0.558	0.21	0.194	0.198	0.112	0.132	0.148	0.439	0.439	0.483	0.422	0.421	0.42	0.103	0.102	0.103	0.102	0.104	0.102	0.511	0.518	0.515	0.343	0.325	0.344	0.103	0.105	0.104	0.105	0.137	0.106
2 days, 0:00:00	30.5	0.481	0.482	0.487	0.463	0.462	0.472	0.447	0.452	0.446	0.45	0.444	0.453	0.126	0.143	0.125	0.535	0.532	0.559	0.209	0.197	0.197	0.111	0.128	0.147	0.438	0.438	0.482	0.421	0.421	0.42	0.103	0.102	0.103	0.102	0.104	0.103	0.512	0.517	0.517	0.341	0.329	0.348	0.103	0.105	0.103	0.105	0.137	0.106
2 days, 0:10:00	30.5	0.482	0.484	0.487	0.465	0.464	0.472	0.448	0.451	0.446	0.447	0.443	0.451	0.138	0.133	0.122	0.535	0.532	0.557	0.209	0.196	0.2	0.111	0.13	0.151	0.438	0.438	0.48	0.422	0.421	0.421	0.103	0.102	0.103	0.101	0.104	0.102	0.514	0.517	0.516	0.343	0.327	0.345	0.103	0.105	0.103	0.105	0.137	0.106
2 days, 0:20:00	30.5	0.48	0.482	0.487	0.466	0.461	0.469	0.447	0.452	0.444	0.445	0.443	0.452	0.144	0.143	0.127	0.535	0.532	0.556	0.212	0.197	0.2	0.111	0.127	0.141	0.439	0.439	0.483	0.422	0.421	0.421	0.103	0.102	0.103	0.101	0.104	0.102	0.514	0.516	0.516	0.346	0.331	0.346	0.103	0.105	0.103	0.105	0.137	0.106
2 days, 0:30:00	30.5	0.482	0.484	0.486	0.465	0.462	0.471	0.449	0.451	0.447	0.441	0.44	0.451	0.134	0.145	0.126	0.536	0.533	0.555	0.212	0.198	0.202	0.112	0.136	0.151	0.437	0.439	0.48	0.422	0.423	0.423	0.103	0.102	0.103	0.102	0.104	0.102	0.514	0.515	0.515	0.344	0.335	0.349	0.103	0.105	0.103	0.105	0.137	0.106
2 days, 0:40:00	30.5	0.482	0.483	0.489	0.467	0.462	0.471	0.449	0.452	0.443	0.437	0.438	0.452	0.137	0.146	0.128	0.536	0.531	0.554	0.212	0.198	0.204	0.111	0.127	0.145	0.44	0.441	0.479	0.424	0.423	0.422	0.103	0.102	0.103	0.102	0.104	0.102	0.519	0.516	0.514	0.348	0.333	0.346	0.103	0.105	0.103	0.105	0.137	0.106
2 days, 0:50:00	30.6	0.483	0.482	0.487	0.465	0.463	0.471	0.449	0.453	0.44	0.435	0.434	0.451	0.139	0.13	0.141	0.538	0.535	0.554	0.214	0.201	0.206	0.111	0.133	0.151	0.44	0.438	0.481	0.424	0.423	0.422	0.103	0.102	0.103	0.102	0.104	0.102	0.516	0.516	0.513	0.35	0.335	0.35	0.103	0.105	0.103	0.105	0.137	0.106
2 days, 1:00:00	30.6	0.482	0.484	0.489	0.466	0.462	0.472	0.451	0.453	0.443	0.437	0.429	0.452	0.146	0.12	0.127	0.537	0.535	0.55	0.215	0.203	0.208	0.11	0.137	0.152	0.44	0.439	0.482	0.424	0.423	0.421	0.103	0.102	0.103	0.102	0.104	0.102	0.518	0.517	0.512	0.354	0.337	0.349	0.103	0.105	0.103	0.105	0.137	0.106
2 days, 1:10:00	30.6	0.482	0.484	0.487	0.467	0.464	0.471	0.45	0.456	0.445	0.437	0.429	0.453	0.131	0.138	0.123	0.535	0.535	0.552	0.216	0.202	0.207	0.111	0.137	0.15	0.44	0.44	0.481	0.427	0.423	0.421	0.103	0.102	0.103	0.102	0.104	0.102	0.52	0.514	0.512	0.355	0.338	0.351	0.103	0.105	0.103	0.105	0.137	0.106
2 days, 1:20:00	30.6	0.483	0.484	0.49	0.467	0.461	0.471	0.449	0.457	0.443	0.437	0.428	0.453	0.144	0.133	0.149	0.537	0.534	0.554	0.217	0.204	0.208	0.111	0.133	0.144	0.44	0.441	0.479	0.424	0.424	0.422	0.103	0.102	0.103	0.102	0.104	0.102	0.517	0.517	0.514	0.355	0.342	0.354	0.103	0.105	0.104	0.105	0.137	0.106
2 days, 1:30:00	30.6	0.484	0.484	0.489	0.468	0.464	0.471	0.449	0.456	0.44	0.437	0.427	0.453	0.126	0.126	0.128	0.538	0.535	0.555	0.219	0.206	0.209	0.111	0.13	0.138	0.44	0.44	0.479	0.425	0.423	0.425	0.103	0.102	0.103	0.102	0.104	0.102	0.52	0.516	0.514	0.36	0.343	0.356	0.103	0.105	0.103	0.105	0.137	0.106
2 days, 1:40:00	30.6	0.483	0.487	0.491	0.467	0.463	0.472	0.449	0.456	0.443	0.436	0.426	0.452	0.129	0.145	0.132	0.54	0.534	0.56	0.22	0.206	0.211	0.111	0.136	0.147	0.442	0.441	0.479	0.426	0.424	0.423	0.103	0.102	0.103	0.102	0.104	0.102	0.517	0.517	0.515	0.36	0.341	0.359	0.103	0.105	0.104	0.105	0.137	0.106
2 days, 1:50:00	30.6	0.483	0.486	0.49	0.467	0.463	0.474	0.451	0.456	0.439	0.437	0.427	0.453	0.138	0.126	0.136	0.539	0.535	0.558	0.223	0.207	0.212	0.111	0.135	0.151	0.442	0.442	0.48	0.424	0.425	0.425	0.103	0.102	0.103	0.102	0.104	0.102	0.52	0.514	0.512	0.364	0.343	0.36	0.103	0.105	0.104	0.105	0.137	0.106
2 days, 2:00:00	30.6	0.484	0.486	0.491	0.467	0.465	0.471	0.451	0.454	0.433	0.435	0.429	0.455	0.143	0.143	0.146	0.537	0.533	0.564	0.222	0.209	0.213	0.11	0.141	0.151	0.443	0.441	0.48	0.426	0.426	0.422	0.103	0.102	0.103	0.102	0.104	0.102	0.52	0.516	0.512	0.365	0.345	0.362	0.103	0.105	0.104	0.105	0.137	0.106
2 days, 2:10:00	30.6	0.483	0.487	0.492	0.469	0.464	0.473	0.451	0.456	0.435	0.438	0.426	0.452	0.13	0.14	0.149	0.539	0.535	0.56	0.226	0.21	0.215	0.11	0.15	0.152	0.443	0.442	0.48	0.426	0.426	0.424	0.103	0.102	0.103	0.102	0.104	0.102	0.521	0.517	0.513	0.369	0.346	0.363	0.103	0.105	0.104	0.105	0.137	0.106
2 days, 2:20:00	30.6	0.485	0.486	0.49	0.467	0.463	0.472	0.451	0.455	0.431	0.437	0.425	0.452	0.144	0.144	0.136	0.539	0.534	0.555	0.228	0.211	0.216	0.11	0.142	0.147	0.442	0.443	0.479	0.427	0.426	0.423	0.103	0.102	0.103	0.102	0.104	0.102	0.521	0.517	0.516	0.373	0.348	0.364	0.103	0.106	0.104	0.105	0.137	0.106
2 days, 2:30:00	30.6	0.484	0.486	0.492	0.468	0.467	0.471	0.452	0.457	0.428	0.436	0.428	0.453	0.135	0.127	0.135	0.538	0.534	0.557	0.23	0.214	0.217	0.111	0.137	0.146	0.442	0.445	0.48	0.427	0.425	0.424	0.103	0.102	0.103	0.102	0.104	0.102	0.52	0.516	0.512	0.369	0.346	0.366	0.103	0.106	0.104	0.105	0.137	0.106
2 days, 2:40:00	30.5	0.485	0.485	0.492	0.467	0.465	0.472	0.453	0.456	0.431	0.438	0.425	0.453	0.121	0.132	0.126	0.54	0.535	0.553	0.232	0.215	0.219	0.11	0.144	0.146	0.444	0.444	0.481	0.425	0.426	0.424	0.103	0.102	0.103	0.101	0.104	0.102	0.52	0.519	0.513	0.376	0.349	0.369	0.103	0.105	0.104	0.105	0.137	0.106
2 days, 2:50:00	30.5	0.484	0.486	0.491	0.469	0.465	0.473	0.45	0.454	0.432	0.442	0.427	0.455	0.136	0.129	0.133	0.542	0.538	0.551	0.235	0.217	0.219	0.11	0.135	0.152	0.444	0.446	0.48	0.427	0.426	0.424	0.103	0.102	0.103	0.102	0.104	0.102	0.521	0.519	0.515	0.372	0.354	0.37	0.103	0.105	0.104	0.105	0.137	0.106
2 days, 3:00:00	30.5	0.486	0.486	0.491	0.467	0.464	0.476	0.454	0.456	0.426	0.438	0.426	0.456	0.141	0.125	0.136	0.54	0.537	0.551	0.234	0.217	0.224	0.113	0.15	0.148	0.443	0.445	0.48	0.426	0.428	0.423	0.103	0.102	0.103	0.102	0.104	0.102	0.52	0.517	0.513	0.372	0.351	0.371	0.103	0.106	0.104	0.105	0.137	0.106
2 days, 3:10:00	30.5	0.486	0.486	0.492	0.468	0.467	0.474	0.454	0.455	0.425	0.439	0.426	0.457	0.129	0.122	0.153	0.541	0.538	0.555	0.234	0.218	0.224	0.112	0.147	0.149	0.445	0.445	0.48	0.427	0.429	0.424	0.103	0.102	0.103	0.102	0.104	0.102	0.521	0.52	0.515	0.375	0.349	0.373	0.103	0.106	0.104	0.105	0.137	0.106
2 days, 3:20:00	30.5	0.486	0.486	0.493	0.468	0.467	0.475	0.453	0.459	0.429	0.443	0.428	0.455	0.132	0.133	0.131	0.542	0.54	0.552	0.235	0.22	0.225	0.112	0.149	0.154	0.444	0.445	0.48	0.427	0.428	0.425	0.103	0.102	0.103	0.102	0.104	0.102	0.522	0.519	0.515	0.377	0.356	0.37	0.103	0.106	0.104	0.105	0.137	0.106
2 days, 3:30:00	30.5	0.488	0.486	0.493	0.469	0.466	0.474	0.453	0.458	0.424	0.438	0.43	0.459	0.148	0.126	0.144	0.541	0.541	0.553	0.236	0.222	0.226	0.112	0.154	0.147	0.447	0.445	0.48	0.427	0.427	0.424	0.103	0.102	0.103	0.102	0.104	0.102	0.523	0.518	0.514	0.375	0.355	0.373	0.103	0.105	0.104	0.105	0.137	0.106
2 days, 3:40:00	30.5	0.489	0.486	0.493	0.469	0.467	0.474	0.455	0.459	0.424	0.437	0.432	0.458	0.142	0.137	0.145	0.543	0.539	0.551	0.238	0.221	0.226	0.112	0.153	0.15	0.446	0.448	0.48	0.427	0.428	0.425	0.103	0.102	0.103	0.102	0.104	0.102	0.523	0.517	0.516	0.378	0.352	0.376	0.103	0.106	0.104	0.105	0.137	0.106
2 days, 3:50:00	30.5	0.487	0.488	0.494	0.469	0.468	0.474	0.454	0.461	0.426	0.439	0.44	0.459	0.139	0.137	0.123	0.541	0.54	0.552	0.24	0.221	0.229	0.111	0.143	0.142	0.446	0.445	0.48	0.427	0.427	0.425	0.103	0.102	0.103	0.102	0.104	0.102	0.524	0.519	0.515	0.38	0.359	0.377	0.103	0.106	0.104	0.105	0.137	0.106
2 days, 4:00:00	30.5	0.488	0.488	0.494	0.471	0.466	0.474	0.453	0.463	0.427	0.44	0.446	0.459	0.122	0.147	0.13	0.542	0.541	0.549	0.241	0.225	0.231	0.113	0.157	0.15	0.447	0.445	0.481	0.426	0.429	0.426	0.103	0.102	0.103	0.102	0.104	0.102	0.522	0.519	0.517	0.381	0.358	0.376	0.103	0.105	0.104	0.105	0.137	0.106
2 days, 4:10:00	30.5	0.488	0.488	0.493	0.471	0.468	0.475	0.453	0.46	0.425	0.439	0.448	0.459	0.123	0.139	0.146	0.544	0.537	0.55	0.242	0.227	0.232	0.112	0.144	0.153	0.448	0.447	0.48	0.426	0.428	0.426	0.103	0.102	0.103	0.101	0.104	0.102	0.523	0.518	0.514	0.379	0.359	0.378	0.103	0.105	0.103	0.104	0.137	0.105
2 days, 4:20:00	30.4	0.488	0.488	0.494	0.471	0.47	0.477	0.455	0.462	0.425	0.444	0.447	0.459	0.14	0.121	0.147	0.542	0.54	0.551	0.245	0.229	0.231	0.111	0.157	0.156	0.447	0.446	0.477	0.428	0.428	0.425	0.103	0.102	0.103	0.102	0.104	0.102	0.523	0.52	0.518	0.386	0.361	0.378	0.103	0.105	0.103	0.105	0.137	0.106
2 days, 4:30:00	30.4	0.489	0.489	0.494	0.47	0.47	0.476	0.454	0.464	0.428	0.443	0.446	0.458	0.138	0.125	0.125	0.542	0.539	0.553	0.246	0.231	0.232	0.111	0.165	0.155	0.446	0.446	0.479	0.426	0.429	0.425	0.103	0.102	0.103	0.102	0.104	0.102	0.521	0.52	0.517	0.384	0.363	0.379	0.103	0.105	0.103	0.105	0.137	0.106
2 days, 4:40:00	30.4	0.489	0.489	0.493	0.472	0.47	0.476	0.453	0.46	0.427	0.44	0.451	0.46	0.145	0.149	0.144	0.543	0.539	0.556	0.247	0.231	0.235	0.113	0.144	0.155	0.447	0.448	0.479	0.429	0.429	0.424	0.103	0.102	0.103	0.102	0.104	0.102	0.522	0.52	0.515	0.385	0.363	0.381	0.103	0.105	0.103	0.105	0.137	0.106
2 days, 4:50:00	30.3	0.489	0.489	0.495	0.471	0.471	0.476	0.454	0.463	0.427	0.445	0.45	0.461	0.149	0.147	0.15	0.541	0.539	0.547	0.249	0.234	0.237	0.112	0.155	0.153	0.449	0.448	0.479	0.429	0.429	0.425	0.103	0.102	0.103	0.102	0.104	0.102	0.523	0.52	0.52	0.384	0.364	0.381	0.103	0.105	0.103	0.105	0.137	0.106
2 days, 5:00:00	30.3	0.49	0.489	0.497	0.47	0.472	0.475	0.453	0.466	0.427	0.448	0.446	0.46	0.144	0.121	0.136	0.541	0.542	0.549	0.251	0.234	0.236	0.111	0.152	0.146	0.447	0.451	0.479	0.428	0.43	0.426	0.103	0.102	0.103	0.102	0.104	0.102	0.524	0.516	0.521	0.389	0.367	0.381	0.103	0.105	0.103	0.105	0.137	0.106
2 days, 5:10:00	30.3	0.49	0.489	0.496	0.469	0.472	0.475	0.456	0.464	0.428	0.447	0.448	0.461	0.126	0.14	0.124	0.542	0.54	0.544	0.251	0.234	0.239	0.111	0.156	0.149	0.448	0.448	0.48	0.428	0.43	0.425	0.103	0.102	0.103	0.102	0.104	0.102	0.522	0.52	0.522	0.387	0.371	0.386	0.103	0.105	0.103	0.105	0.137	0.105
2 days, 5:20:00	30.2	0.491	0.49	0.496	0.474	0.474	0.475	0.454	0.464	0.426	0.443	0.452	0.463	0.144	0.141	0.127	0.545	0.541	0.55	0.254	0.238	0.237	0.111	0.165	0.152	0.446	0.45	0.479	0.428	0.43	0.422	0.103	0.102	0.103	0.102	0.104	0.102	0.523	0.522	0.516	0.389	0.366	0.384	0.103	0.105	0.103	0.105	0.137	0.105
2 days, 5:30:00	30.2	0.492	0.489	0.498	0.472	0.473	0.473	0.453	0.464	0.424	0.445	0.45	0.461	0.136	0.126	0.132	0.546	0.541	0.547	0.253	0.24	0.24	0.11	0.166	0.157	0.446	0.449	0.478	0.429	0.43	0.424	0.103	0.102	0.103	0.102	0.104	0.102	0.521	0.521	0.521	0.39	0.372	0.386	0.103	0.105	0.103	0.104	0.137	0.105
2 days, 5:40:00	30.2	0.492	0.488	0.497	0.473	0.474	0.473	0.455	0.464	0.426	0.445	0.451	0.463	0.149	0.142	0.135	0.544	0.542	0.545	0.254	0.243	0.243	0.11	0.154	0.157	0.445	0.449	0.479	0.429	0.431	0.425	0.103	0.102	0.103	0.102	0.104	0.102	0.521	0.522	0.52	0.392	0.371	0.386	0.103	0.105	0.103	0.105	0.137	0.106
2 days, 5:50:00	30.2	0.489	0.49	0.496	0.473	0.474	0.473	0.455	0.467	0.425	0.444	0.451	0.464	0.151	0.121	0.142	0.542	0.542	0.548	0.258	0.244	0.243	0.11	0.159	0.157	0.446	0.449	0.477	0.43	0.431	0.423	0.103	0.102	0.103	0.102	0.104	0.102	0.523	0.522	0.521	0.394	0.369	0.388	0.103	0.105	0.103	0.105	0.137	0.105
2 days, 6:00:00	30.1	0.491	0.49	0.497	0.471	0.473	0.476	0.457	0.466	0.424	0.444	0.451	0.464	0.132	0.128	0.132	0.542	0.542	0.545	0.256	0.244	0.246	0.109	0.153	0.154	0.445	0.449	0.478	0.43	0.431	0.423	0.103	0.102	0.103	0.102	0.104	0.102	0.524	0.523	0.522	0.393	0.373	0.383	0.103	0.105	0.103	0.105	0.137	0.106
2 days, 6:10:00	30.1	0.493	0.49	0.498	0.473	0.474	0.474	0.456	0.464	0.426	0.44	0.452	0.468	0.141	0.121	0.142	0.541	0.541	0.549	0.26	0.249	0.245	0.109	0.15	0.162	0.449	0.448	0.477	0.43	0.431	0.425	0.103	0.102	0.103	0.102	0.104	0.102	0.522	0.524	0.521	0.39	0.371	0.386	0.103	0.105	0.103	0.104	0.137	0.105
2 days, 6:20:00	30.1	0.49	0.491	0.497	0.473	0.475	0.476	0.458	0.468	0.426	0.443	0.45	0.468	0.148	0.13	0.147	0.541	0.541	0.545	0.261	0.251	0.249	0.11	0.158	0.158	0.447	0.45	0.476	0.429	0.43	0.426	0.103	0.102	0.103	0.101	0.104	0.102	0.523	0.523	0.522	0.393	0.373	0.39	0.103	0.105	0.103	0.104	0.137	0.105
2 days, 6:30:00	30.1	0.49	0.488	0.499	0.473	0.475	0.477	0.459	0.467	0.425	0.444	0.451	0.47	0.136	0.132	0.149	0.543	0.542	0.544	0.261	0.251	0.248	0.11	0.152	0.154	0.448	0.448	0.478	0.43	0.432	0.423	0.103	0.102	0.103	0.101	0.104	0.102	0.522	0.522	0.521	0.397	0.371	0.386	0.103	0.105	0.103	0.104	0.137	0.105
2 days, 6:40:00	30.1	0.491	0.49	0.497	0.473	0.477	0.477	0.459	0.468	0.428	0.443	0.45	0.47	0.13	0.144	0.122	0.542	0.543	0.548	0.263	0.253	0.249	0.11	0.155	0.16	0.446	0.449	0.478	0.432	0.432	0.425	0.103	0.102	0.103	0.101	0.104	0.102	0.522	0.522	0.52	0.396	0.378	0.389	0.103	0.105	0.103	0.105	0.137	0.105
2 days, 6:50:00	30.1	0.491	0.491	0.498	0.471	0.474	0.478	0.46	0.47	0.431	0.447	0.447	0.468	0.147	0.124	0.152	0.544	0.542	0.549	0.265	0.253	0.251	0.109	0.168	0.161	0.447	0.45	0.477	0.43	0.429	0.425	0.103	0.102	0.103	0.102	0.104	0.102	0.523	0.521	0.523	0.399	0.375	0.391	0.103	0.105	0.103	0.104	0.137	0.105
2 days, 7:00:00	30.1	0.492	0.491	0.499	0.472	0.475	0.478	0.461	0.466	0.429	0.445	0.448	0.47	0.149	0.123	0.126	0.542	0.542	0.551	0.266	0.255	0.252	0.109	0.156	0.162	0.447	0.45	0.477	0.431	0.429	0.425	0.103	0.102	0.103	0.101	0.104	0.102	0.523	0.522	0.525	0.397	0.376	0.391	0.103	0.105	0.103	0.104	0.137	0.105
2 days, 7:10:00	30.1	0.493	0.492	0.501	0.471	0.477	0.48	0.462	0.466	0.429	0.442	0.446	0.47	0.145	0.145	0.123	0.544	0.544	0.548	0.269	0.257	0.25	0.109	0.155	0.154	0.446	0.45	0.477	0.43	0.428	0.427	0.103	0.102	0.103	0.101	0.104	0.102	0.523	0.52	0.524	0.398	0.38	0.391	0.103	0.105	0.103	0.104	0.137	0.105
2 days, 7:20:00	30.1	0.493	0.49	0.5	0.471	0.477	0.477	0.462	0.463	0.43	0.443	0.449	0.472	0.133	0.146	0.138	0.545	0.545	0.546	0.271	0.259	0.253	0.11	0.156	0.156	0.447	0.447	0.476	0.431	0.427	0.426	0.103	0.102	0.103	0.101	0.104	0.102	0.522	0.522	0.525	0.397	0.377	0.392	0.103	0.105	0.103	0.105	0.137	0.106
2 days, 7:30:00	30.1	0.493	0.491	0.499	0.472	0.474	0.478	0.462	0.466	0.432	0.443	0.448	0.473	0.129	0.149	0.154	0.544	0.544	0.546	0.271	0.26	0.255	0.109	0.16	0.155	0.447	0.449	0.478	0.431	0.431	0.425	0.103	0.102	0.103	0.102	0.104	0.102	0.522	0.523	0.524	0.402	0.377	0.39	0.103	0.105	0.103	0.104	0.137	0.105
2 days, 7:40:00	30	0.491	0.49	0.499	0.471	0.474	0.477	0.462	0.468	0.431	0.445	0.445	0.474	0.14	0.131	0.15	0.543	0.543	0.545	0.272	0.263	0.255	0.11	0.142	0.146	0.444	0.447	0.477	0.431	0.429	0.427	0.103	0.102	0.103	0.101	0.104	0.102	0.521	0.522	0.524	0.4	0.375	0.394	0.103	0.105	0.103	0.104	0.137	0.105
2 days, 7:50:00	30	0.491	0.49	0.5	0.472	0.477	0.478	0.461	0.47	0.434	0.449	0.443	0.473	0.15	0.142	0.137	0.541	0.544	0.547	0.273	0.263	0.26	0.11	0.164	0.158	0.447	0.448	0.478	0.432	0.429	0.425	0.103	0.102	0.103	0.101	0.104	0.102	0.522	0.521	0.525	0.404	0.377	0.396	0.103	0.105	0.103	0.105	0.137	0.106
2 days, 8:00:00	30.1	0.492	0.492	0.499	0.47	0.476	0.477	0.46	0.472	0.434	0.45	0.443	0.472	0.13	0.143	0.127	0.544	0.543	0.545	0.273	0.266	0.258	0.109	0.156	0.16	0.448	0.451	0.478	0.431	0.43	0.426	0.103	0.102	0.103	0.101	0.104	0.102	0.523	0.521	0.527	0.405	0.382	0.395	0.103	0.105	0.103	0.104	0.137	0.105
2 days, 8:10:00	30.1	0.491	0.49	0.499	0.473	0.479	0.479	0.461	0.465	0.432	0.45	0.444	0.472	0.137	0.12	0.143	0.546	0.544	0.546	0.278	0.268	0.257	0.109	0.172	0.154	0.447	0.446	0.477	0.43	0.43	0.426	0.103	0.102	0.103	0.101	0.104	0.102	0.522	0.524	0.526	0.406	0.379	0.397	0.102	0.105	0.103	0.104	0.137	0.105
2 days, 8:20:00	30	0.493	0.492	0.499	0.472	0.478	0.477	0.459	0.467	0.435	0.449	0.443	0.472	0.137	0.122	0.131	0.544	0.542	0.546	0.275	0.269	0.262	0.109	0.154	0.162	0.447	0.447	0.479	0.431	0.429	0.425	0.103	0.102	0.103	0.102	0.104	0.102	0.521	0.523	0.526	0.406	0.382	0.395	0.103	0.105	0.103	0.105	0.137	0.106
2 days, 8:30:00	30	0.491	0.491	0.498	0.472	0.476	0.474	0.462	0.463	0.427	0.438	0.443	0.472	0.132	0.145	0.143	0.543	0.549	0.567	0.277	0.27	0.259	0.109	0.166	0.159	0.446	0.449	0.478	0.431	0.429	0.429	0.103	0.102	0.103	0.101	0.104	0.102	0.524	0.524	0.523	0.405	0.378	0.392	0.103	0.105	0.103	0.104	0.137	0.105
2 days, 8:40:00	30	0.49	0.491	0.5	0.472	0.475	0.475	0.462	0.464	0.43	0.44	0.442	0.473	0.147	0.14	0.135	0.541	0.548	0.544	0.278	0.274	0.263	0.109	0.141	0.161	0.446	0.449	0.478	0.431	0.43	0.429	0.103	0.102	0.103	0.102	0.104	0.102	0.521	0.522	0.525	0.408	0.382	0.396	0.103	0.105	0.103	0.105	0.137	0.105
2 days, 8:50:00	30	0.492	0.492	0.499	0.472	0.476	0.475	0.461	0.463	0.43	0.437	0.444	0.471	0.149	0.126	0.14	0.541	0.545	0.547	0.278	0.274	0.263	0.109	0.169	0.165	0.447	0.449	0.479	0.433	0.43	0.427	0.103	0.102	0.103	0.102	0.104	0.102	0.521	0.523	0.524	0.408	0.376	0.396	0.103	0.105	0.103	0.105	0.137	0.106
2 days, 9:00:00	30	0.49	0.491	0.498	0.472	0.475	0.474	0.462	0.461	0.428	0.436	0.442	0.47	0.125	0.143	0.139	0.542	0.544	0.545	0.279	0.274	0.263	0.109	0.16	0.16	0.446	0.449	0.479	0.43	0.43	0.426	0.103	0.102	0.103	0.101	0.104	0.102	0.52	0.526	0.522	0.41	0.379	0.393	0.103	0.105	0.103	0.105	0.137	0.105
2 days, 9:10:00	30	0.493	0.493	0.499	0.473	0.475	0.472	0.462	0.462	0.427	0.437	0.443	0.47	0.147	0.149	0.124	0.54	0.545	0.545	0.28	0.279	0.263	0.109	0.166	0.157	0.447	0.448	0.478	0.431	0.43	0.426	0.103	0.102	0.103	0.101	0.104	0.102	0.52	0.526	0.524	0.411	0.383	0.397	0.103	0.105	0.103	0.105	0.137	0.105
2 days, 9:20:00	30	0.493	0.492	0.499	0.472	0.475	0.472	0.463	0.462	0.427	0.438	0.443	0.47	0.143	0.144	0.149	0.542	0.544	0.547	0.282	0.281	0.265	0.109	0.159	0.145	0.447	0.449	0.479	0.43	0.431	0.427	0.103	0.102	0.103	0.101	0.104	0.102	0.522	0.526	0.525	0.41	0.382	0.399	0.103	0.105	0.103	0.104	0.137	0.105
2 days, 9:30:00	30	0.49	0.493	0.5	0.471	0.475	0.472	0.466	0.462	0.429	0.437	0.445	0.469	0.125	0.142	0.154	0.539	0.545	0.547	0.284	0.28	0.268	0.109	0.168	0.162	0.445	0.448	0.479	0.431	0.431	0.427	0.103	0.102	0.103	0.101	0.104	0.102	0.52	0.526	0.524	0.411	0.379	0.398	0.103	0.105	0.103	0.104	0.137	0.105
2 days, 9:40:00	30	0.492	0.492	0.499	0.473	0.475	0.472	0.465	0.459	0.428	0.436	0.444	0.47	0.129	0.136	0.15	0.539	0.545	0.546	0.283	0.282	0.27	0.11	0.152	0.147	0.446	0.448	0.479	0.43	0.431	0.426	0.103	0.102	0.103	0.101	0.104	0.102	0.52	0.527	0.524	0.41	0.382	0.399	0.103	0.105	0.103	0.104	0.137	0.105
2 days, 9:50:00	30	0.492	0.492	0.498	0.471	0.474	0.476	0.464	0.465	0.433	0.443	0.445	0.47	0.14	0.137	0.122	0.537	0.543	0.547	0.286	0.284	0.269	0.109	0.17	0.16	0.447	0.448	0.476	0.431	0.43	0.427	0.103	0.102	0.103	0.101	0.104	0.102	0.519	0.527	0.525	0.414	0.386	0.403	0.103	0.105	0.103	0.104	0.137	0.105
2 days, 10:00:00	30	0.493	0.492	0.499	0.47	0.476	0.478	0.465	0.466	0.437	0.442	0.443	0.471	0.128	0.128	0.128	0.539	0.545	0.548	0.288	0.285	0.269	0.109	0.164	0.159	0.447	0.447	0.476	0.432	0.429	0.426	0.103	0.102	0.103	0.101	0.104	0.102	0.521	0.526	0.524	0.412	0.387	0.404	0.103	0.105	0.103	0.104	0.137	0.105
2 days, 10:10:00	30	0.493	0.491	0.5	0.475	0.476	0.477	0.464	0.468	0.44	0.447	0.443	0.472	0.131	0.119	0.124	0.537	0.548	0.551	0.289	0.284	0.274	0.109	0.161	0.159	0.446	0.448	0.477	0.43	0.43	0.427	0.103	0.102	0.103	0.101	0.104	0.102	0.521	0.524	0.527	0.413	0.388	0.404	0.103	0.105	0.103	0.104	0.137	0.105
2 days, 10:20:00	30	0.491	0.492	0.498	0.47	0.476	0.479	0.464	0.47	0.441	0.45	0.445	0.473	0.134	0.145	0.135	0.536	0.546	0.549	0.29	0.289	0.275	0.11	0.174	0.155	0.447	0.448	0.477	0.43	0.43	0.425	0.103	0.102	0.103	0.101	0.104	0.102	0.518	0.525	0.527	0.417	0.389	0.407	0.103	0.105	0.103	0.104	0.137	0.105
2 days, 10:30:00	30	0.491	0.491	0.501	0.47	0.477	0.478	0.466	0.467	0.442	0.45	0.445	0.47	0.13	0.146	0.133	0.539	0.545	0.547	0.292	0.288	0.273	0.11	0.155	0.152	0.445	0.447	0.479	0.428	0.429	0.426	0.103	0.102	0.103	0.101	0.104	0.102	0.519	0.524	0.526	0.415	0.387	0.412	0.103	0.105	0.103	0.104	0.137	0.105
2 days, 10:40:00	30	0.492	0.49	0.499	0.472	0.477	0.479	0.465	0.471	0.444	0.454	0.442	0.468	0.133	0.15	0.127	0.54	0.548	0.55	0.293	0.291	0.279	0.109	0.171	0.16	0.446	0.445	0.476	0.429	0.43	0.426	0.103	0.102	0.103	0.102	0.104	0.102	0.519	0.523	0.526	0.419	0.384	0.412	0.103	0.105	0.103	0.105	0.137	0.106
2 days, 10:50:00	30	0.492	0.492	0.498	0.47	0.479	0.478	0.467	0.469	0.443	0.451	0.444	0.471	0.148	0.149	0.133	0.536	0.546	0.549	0.295	0.292	0.277	0.11	0.177	0.163	0.446	0.449	0.476	0.43	0.43	0.428	0.103	0.102	0.103	0.102	0.104	0.102	0.52	0.523	0.526	0.416	0.392	0.407	0.103	0.105	0.103	0.105	0.137	0.106
2 days, 11:00:00	30	0.492	0.492	0.498	0.473	0.478	0.48	0.465	0.469	0.445	0.456	0.444	0.472	0.138	0.138	0.151	0.537	0.547	0.549	0.298	0.292	0.28	0.109	0.174	0.165	0.444	0.446	0.477	0.431	0.428	0.426	0.103	0.102	0.103	0.102	0.104	0.102	0.519	0.523	0.523	0.417	0.388	0.412	0.103	0.105	0.103	0.105	0.137	0.105
2 days, 11:10:00	30	0.492	0.493	0.498	0.472	0.479	0.481	0.468	0.471	0.444	0.457	0.439	0.47	0.14	0.131	0.137	0.537	0.544	0.55	0.295	0.292	0.277	0.11	0.153	0.158	0.445	0.446	0.477	0.43	0.429	0.427	0.103	0.102	0.103	0.101	0.104	0.102	0.52	0.52	0.524	0.419	0.388	0.41	0.103	0.105	0.103	0.104	0.137	0.105
2 days, 11:20:00	30	0.492	0.492	0.497	0.472	0.48	0.479	0.466	0.465	0.442	0.448	0.44	0.468	0.123	0.121	0.139	0.534	0.543	0.546	0.294	0.292	0.277	0.109	0.17	0.161	0.446	0.448	0.477	0.43	0.432	0.428	0.103	0.102	0.103	0.102	0.104	0.102	0.518	0.526	0.523	0.419	0.39	0.412	0.103	0.105	0.103	0.105	0.137	0.106
2 days, 11:30:00	30	0.491	0.493	0.498	0.472	0.479	0.477	0.467	0.463	0.437	0.443	0.443	0.467	0.148	0.139	0.131	0.539	0.545	0.546	0.296	0.288	0.275	0.109	0.158	0.151	0.445	0.447	0.478	0.43	0.431	0.426	0.103	0.102	0.103	0.102	0.104	0.102	0.517	0.524	0.525	0.419	0.384	0.409	0.103	0.105	0.103	0.105	0.137	0.106
2 days, 11:40:00	30	0.492	0.494	0.497	0.471	0.479	0.479	0.466	0.463	0.44	0.448	0.442	0.467	0.124	0.142	0.126	0.536	0.543	0.546	0.297	0.292	0.279	0.109	0.168	0.155	0.447	0.446	0.479	0.432	0.43	0.429	0.103	0.102	0.103	0.101	0.104	0.102	0.517	0.523	0.522	0.418	0.388	0.411	0.103	0.105	0.103	0.105	0.137	0.106
2 days, 11:50:00	30	0.492	0.493	0.498	0.472	0.479	0.482	0.47	0.47	0.448	0.457	0.441	0.471	0.142	0.124	0.126	0.538	0.543	0.551	0.302	0.294	0.282	0.109	0.153	0.16	0.444	0.446	0.476	0.43	0.428	0.427	0.103	0.102	0.103	0.101	0.104	0.102	0.517	0.523	0.525	0.421	0.395	0.418	0.103	0.105	0.103	0.105	0.137	0.106
2 days, 12:00:00	30	0.493	0.492	0.496	0.471	0.479	0.482	0.468	0.469	0.447	0.457	0.443	0.471	0.147	0.147	0.128	0.54	0.545	0.549	0.301	0.295	0.281	0.109	0.18	0.164	0.444	0.446	0.475	0.43	0.427	0.426	0.103	0.102	0.103	0.101	0.104	0.102	0.516	0.521	0.523	0.424	0.388	0.414	0.103	0.105	0.103	0.105	0.137	0.106
2 days, 12:10:00	30	0.492	0.493	0.496	0.472	0.479	0.48	0.468	0.47	0.449	0.455	0.442	0.47	0.142	0.149	0.122	0.539	0.546	0.552	0.305	0.292	0.281	0.109	0.178	0.159	0.445	0.445	0.477	0.43	0.429	0.426	0.103	0.102	0.103	0.101	0.104	0.102	0.516	0.524	0.525	0.422	0.389	0.417	0.103	0.105	0.103	0.105	0.137	0.105
2 days, 12:20:00	30	0.492	0.491	0.496	0.472	0.48	0.48	0.468	0.469	0.449	0.461	0.442	0.469	0.131	0.15	0.128	0.537	0.546	0.55	0.304	0.297	0.287	0.109	0.176	0.168	0.445	0.447	0.475	0.429	0.427	0.427	0.103	0.102	0.103	0.101	0.104	0.102	0.519	0.523	0.523	0.424	0.387	0.418	0.103	0.105	0.103	0.105	0.137	0.106
2 days, 12:30:00	30	0.491	0.492	0.496	0.471	0.478	0.479	0.467	0.462	0.442	0.453	0.444	0.47	0.143	0.149	0.132	0.535	0.543	0.552	0.304	0.293	0.278	0.109	0.174	0.167	0.444	0.446	0.476	0.431	0.429	0.427	0.103	0.102	0.103	0.101	0.104	0.102	0.519	0.521	0.52	0.422	0.391	0.417	0.103	0.105	0.103	0.105	0.137	0.106
2 days, 12:40:00	30	0.491	0.491	0.495	0.471	0.478	0.479	0.469	0.467	0.445	0.456	0.445	0.469	0.129	0.133	0.126	0.537	0.542	0.551	0.304	0.294	0.283	0.109	0.178	0.152	0.445	0.445	0.474	0.429	0.428	0.426	0.103	0.102	0.103	0.101	0.104	0.102	0.516	0.524	0.522	0.422	0.389	0.413	0.103	0.105	0.103	0.105	0.137	0.106
2 days, 12:50:00	30	0.491	0.491	0.495	0.471	0.478	0.479	0.467	0.468	0.445	0.458	0.444	0.468	0.15	0.125	0.13	0.537	0.542	0.548	0.306	0.295	0.283	0.109	0.157	0.168	0.444	0.444	0.474	0.43	0.428	0.428	0.103	0.102	0.103	0.101	0.104	0.102	0.516	0.524	0.523	0.424	0.39	0.417	0.103	0.105	0.103	0.105	0.137	0.105
2 days, 13:00:00	30	0.49	0.492	0.495	0.47	0.479	0.479	0.468	0.466	0.448	0.461	0.444	0.469	0.148	0.149	0.122	0.535	0.542	0.55	0.306	0.297	0.288	0.109	0.148	0.146	0.443	0.444	0.473	0.43	0.429	0.425	0.102	0.102	0.103	0.101	0.104	0.102	0.518	0.523	0.522	0.425	0.392	0.416	0.103	0.105	0.103	0.104	0.137	0.105
2 days, 13:10:00	30	0.491	0.493	0.496	0.469	0.48	0.478	0.47	0.466	0.45	0.458	0.444	0.47	0.141	0.129	0.131	0.536	0.542	0.549	0.308	0.298	0.285	0.109	0.16	0.159	0.445	0.445	0.475	0.429	0.428	0.426	0.103	0.102	0.103	0.101	0.104	0.102	0.518	0.522	0.519	0.426	0.392	0.417	0.102	0.105	0.103	0.105	0.137	0.105
2 days, 13:20:00	30	0.492	0.491	0.497	0.471	0.477	0.479	0.466	0.465	0.449	0.457	0.443	0.467	0.15	0.142	0.124	0.535	0.542	0.55	0.308	0.296	0.285	0.109	0.167	0.155	0.444	0.446	0.474	0.431	0.428	0.426	0.103	0.102	0.103	0.102	0.104	0.102	0.516	0.519	0.52	0.425	0.386	0.418	0.103	0.105	0.103	0.105	0.137	0.106
2 days, 13:30:00	30	0.49	0.493	0.496	0.471	0.48	0.478	0.469	0.466	0.448	0.46	0.444	0.469	0.15	0.127	0.15	0.535	0.546	0.551	0.309	0.299	0.284	0.109	0.169	0.168	0.444	0.442	0.474	0.429	0.426	0.427	0.103	0.102	0.103	0.101	0.104	0.102	0.516	0.522	0.52	0.425	0.392	0.418	0.103	0.105	0.103	0.105	0.137	0.106
2 days, 13:40:00	30	0.492	0.492	0.496	0.468	0.478	0.479	0.467	0.463	0.446	0.451	0.448	0.468	0.15	0.146	0.143	0.535	0.541	0.553	0.309	0.299	0.286	0.109	0.174	0.165	0.445	0.445	0.475	0.428	0.427	0.426	0.103	0.102	0.103	0.101	0.104	0.102	0.517	0.519	0.518	0.422	0.387	0.42	0.103	0.105	0.103	0.105	0.137	0.106
2 days, 13:50:00	30	0.492	0.493	0.495	0.471	0.478	0.476	0.467	0.458	0.445	0.447	0.445	0.465	0.132	0.139	0.143	0.534	0.54	0.556	0.309	0.297	0.282	0.109	0.168	0.16	0.444	0.445	0.477	0.43	0.428	0.428	0.103	0.102	0.103	0.101	0.104	0.102	0.513	0.522	0.519	0.424	0.387	0.418	0.103	0.105	0.103	0.105	0.137	0.106
2 days, 14:00:00	30	0.491	0.493	0.497	0.469	0.479	0.476	0.465	0.459	0.443	0.447	0.447	0.466	0.133	0.142	0.153	0.535	0.539	0.558	0.313	0.296	0.283	0.109	0.151	0.154	0.444	0.446	0.475	0.43	0.427	0.428	0.103	0.102	0.103	0.102	0.104	0.102	0.515	0.521	0.519	0.425	0.39	0.421	0.103	0.106	0.103	0.105	0.137	0.106
2 days, 14:10:00	30	0.491	0.494	0.496	0.47	0.479	0.475	0.466	0.456	0.442	0.447	0.446	0.464	0.125	0.135	0.151	0.532	0.536	0.558	0.311	0.298	0.281	0.109	0.171	0.154	0.444	0.445	0.478	0.429	0.427	0.427	0.103	0.102	0.103	0.101	0.104	0.102	0.516	0.521	0.516	0.423	0.388	0.419	0.103	0.105	0.103	0.105	0.137	0.106
2 days, 14:20:00	30	0.489	0.492	0.494	0.47	0.477	0.476	0.463	0.455	0.444	0.446	0.448	0.466	0.153	0.131	0.149	0.532	0.537	0.56	0.309	0.3	0.283	0.109	0.175	0.158	0.444	0.445	0.477	0.43	0.428	0.426	0.103	0.102	0.103	0.102	0.104	0.102	0.515	0.52	0.517	0.426	0.391	0.419	0.103	0.105	0.103	0.105	0.137	0.106
2 days, 14:30:00	30	0.49	0.493	0.496	0.469	0.476	0.476	0.465	0.458	0.443	0.447	0.448	0.468	0.142	0.137	0.132	0.532	0.536	0.562	0.315	0.3	0.286	0.109	0.166	0.153	0.444	0.445	0.475	0.43	0.427	0.425	0.103	0.102	0.103	0.102	0.104	0.102	0.514	0.518	0.518	0.424	0.388	0.42	0.103	0.105	0.103	0.105	0.137	0.106
2 days, 14:40:00	30	0.492	0.491	0.493	0.468	0.478	0.477	0.466	0.459	0.444	0.449	0.446	0.466	0.151	0.143	0.125	0.529	0.539	0.56	0.316	0.302	0.289	0.109	0.159	0.142	0.444	0.447	0.473	0.43	0.426	0.427	0.103	0.102	0.103	0.102	0.104	0.102	0.516	0.52	0.516	0.422	0.39	0.419	0.103	0.105	0.103	0.105	0.137	0.106
2 days, 14:50:00	30	0.491	0.491	0.495	0.468	0.476	0.477	0.465	0.455	0.444	0.446	0.452	0.467	0.125	0.137	0.147	0.529	0.535	0.56	0.315	0.301	0.29	0.109	0.175	0.162	0.443	0.444	0.475	0.429	0.425	0.424	0.103	0.102	0.103	0.102	0.104	0.102	0.514	0.519	0.516	0.423	0.39	0.421	0.103	0.105	0.103	0.105	0.137	0.106
2 days, 15:00:00	30	0.491	0.491	0.493	0.468	0.479	0.477	0.463	0.458	0.449	0.449	0.449	0.467	0.138	0.129	0.142	0.528	0.539	0.554	0.318	0.302	0.292	0.109	0.157	0.149	0.444	0.446	0.473	0.427	0.425	0.425	0.103	0.102	0.103	0.102	0.104	0.102	0.514	0.52	0.517	0.422	0.391	0.421	0.103	0.105	0.103	0.105	0.137	0.106
2 days, 15:10:00	30	0.492	0.492	0.494	0.468	0.478	0.477	0.466	0.46	0.45	0.45	0.446	0.464	0.128	0.142	0.151	0.532	0.535	0.553	0.318	0.304	0.291	0.109	0.172	0.162	0.442	0.444	0.472	0.429	0.424	0.425	0.103	0.102	0.103	0.101	0.104	0.102	0.515	0.52	0.516	0.424	0.395	0.422	0.103	0.105	0.103	0.105	0.137	0.106
2 days, 15:20:00	30	0.492	0.489	0.491	0.47	0.479	0.479	0.466	0.46	0.452	0.452	0.449	0.465	0.13	0.148	0.135	0.534	0.541	0.555	0.322	0.306	0.294	0.109	0.151	0.139	0.443	0.443	0.471	0.426	0.422	0.424	0.103	0.102	0.103	0.101	0.104	0.102	0.516	0.519	0.517	0.426	0.395	0.421	0.103	0.105	0.103	0.105	0.137	0.106
2 days, 15:30:00	30	0.49	0.49	0.493	0.469	0.479	0.478	0.466	0.462	0.454	0.453	0.448	0.466	0.152	0.147	0.139	0.53	0.537	0.555	0.324	0.308	0.294	0.108	0.165	0.16	0.445	0.446	0.469	0.426	0.424	0.424	0.103	0.102	0.103	0.101	0.104	0.102	0.514	0.518	0.514	0.425	0.39	0.421	0.103	0.105	0.103	0.105	0.137	0.106
2 days, 15:40:00	30	0.49	0.49	0.494	0.468	0.478	0.479	0.464	0.468	0.457	0.462	0.444	0.466	0.127	0.136	0.128	0.535	0.539	0.552	0.323	0.309	0.3	0.109	0.146	0.163	0.444	0.444	0.469	0.426	0.422	0.424	0.103	0.102	0.103	0.102	0.104	0.102	0.516	0.518	0.515	0.423	0.395	0.421	0.103	0.105	0.103	0.105	0.137	0.106
2 days, 15:50:00	30	0.492	0.489	0.495	0.47	0.478	0.477	0.464	0.467	0.456	0.459	0.447	0.467	0.14	0.147	0.126	0.531	0.539	0.553	0.324	0.309	0.295	0.109	0.165	0.154	0.443	0.445	0.469	0.426	0.422	0.425	0.103	0.102	0.103	0.101	0.104	0.102	0.513	0.517	0.514	0.421	0.393	0.421	0.103	0.105	0.103	0.105	0.106	0.106
2 days, 16:00:00	30	0.491	0.491	0.492	0.468	0.478	0.478	0.466	0.463	0.455	0.457	0.45	0.468	0.143	0.146	0.144	0.528	0.533	0.555	0.325	0.31	0.298	0.109	0.169	0.151	0.442	0.443	0.473	0.426	0.422	0.422	0.103	0.102	0.103	0.101	0.104	0.102	0.514	0.521	0.515	0.423	0.384	0.418	0.103	0.105	0.103	0.105	0.106	0.106
2 days, 16:10:00	30.1	0.491	0.491	0.495	0.469	0.477	0.477	0.466	0.466	0.457	0.455	0.445	0.467	0.144	0.137	0.123	0.531	0.538	0.554	0.323	0.312	0.299	0.109	0.18	0.156	0.444	0.444	0.471	0.427	0.42	0.425	0.103	0.102	0.103	0.102	0.104	0.102	0.516	0.516	0.514	0.422	0.39	0.422	0.103	0.105	0.103	0.105	0.106	0.106
2 days, 16:20:00	30.1	0.489	0.491	0.494	0.467	0.477	0.476	0.466	0.464	0.457	0.452	0.447	0.468	0.15	0.138	0.148	0.532	0.538	0.554	0.329	0.312	0.301	0.109	0.161	0.158	0.445	0.444	0.468	0.425	0.421	0.423	0.103	0.102	0.103	0.102	0.104	0.102	0.514	0.516	0.514	0.423	0.392	0.42	0.103	0.105	0.103	0.105	0.106	0.106
2 days, 16:30:00	30.1	0.49	0.492	0.494	0.468	0.478	0.476	0.464	0.459	0.456	0.451	0.45	0.467	0.132	0.138	0.139	0.53	0.533	0.562	0.324	0.312	0.299	0.109	0.168	0.153	0.441	0.443	0.47	0.424	0.423	0.423	0.103	0.102	0.103	0.101	0.104	0.102	0.514	0.519	0.514	0.421	0.386	0.417	0.103	0.105	0.103	0.105	0.106	0.106
2 days, 16:40:00	30.2	0.49	0.491	0.492	0.467	0.477	0.475	0.465	0.458	0.454	0.453	0.447	0.467	0.127	0.15	0.129	0.532	0.536	0.558	0.325	0.31	0.294	0.109	0.155	0.138	0.441	0.443	0.469	0.424	0.421	0.424	0.103	0.102	0.103	0.101	0.104	0.102	0.511	0.518	0.514	0.421	0.391	0.417	0.102	0.105	0.103	0.104	0.106	0.105
2 days, 16:50:00	30.2	0.489	0.491	0.492	0.468	0.476	0.473	0.464	0.45	0.446	0.443	0.452	0.464	0.133	0.149	0.148	0.524	0.531	0.563	0.324	0.313	0.298	0.109	0.178	0.16	0.439	0.441	0.473	0.424	0.422	0.423	0.103	0.102	0.103	0.102	0.104	0.102	0.513	0.518	0.514	0.418	0.383	0.418	0.103	0.105	0.103	0.105	0.106	0.106
2 days, 17:00:00	30.2	0.49	0.489	0.49	0.465	0.477	0.473	0.462	0.455	0.45	0.446	0.448	0.463	0.131	0.124	0.133	0.531	0.533	0.563	0.329	0.308	0.296	0.108	0.169	0.144	0.442	0.441	0.471	0.425	0.42	0.423	0.103	0.102	0.103	0.101	0.104	0.102	0.514	0.52	0.512	0.415	0.388	0.415	0.103	0.105	0.103	0.105	0.106	0.105
2 days, 17:10:00	30.2	0.49	0.492	0.492	0.468	0.475	0.475	0.463	0.455	0.449	0.451	0.451	0.464	0.152	0.122	0.139	0.531	0.532	0.561	0.328	0.312	0.299	0.108	0.147	0.161	0.441	0.441	0.467	0.424	0.42	0.424	0.103	0.102	0.103	0.101	0.104	0.102	0.513	0.52	0.513	0.42	0.384	0.415	0.103	0.105	0.103	0.105	0.106	0.106
2 days, 17:20:00	30.2	0.488	0.491	0.494	0.468	0.476	0.475	0.463	0.46	0.455	0.446	0.447	0.466	0.148	0.14	0.137	0.533	0.537	0.559	0.333	0.315	0.303	0.109	0.172	0.157	0.441	0.44	0.469	0.424	0.418	0.424	0.103	0.102	0.103	0.101	0.103	0.102	0.516	0.518	0.513	0.42	0.388	0.418	0.103	0.105	0.103	0.105	0.106	0.106
2 days, 17:30:00	30.2	0.49	0.49	0.493	0.468	0.475	0.475	0.463	0.458	0.453	0.443	0.446	0.465	0.152	0.12	0.128	0.532	0.536	0.56	0.33	0.314	0.302	0.109	0.168	0.158	0.443	0.44	0.467	0.422	0.418	0.423	0.103	0.102	0.103	0.101	0.104	0.102	0.512	0.516	0.512	0.417	0.39	0.418	0.102	0.105	0.103	0.105	0.106	0.105
2 days, 17:40:00	30.3	0.49	0.49	0.492	0.467	0.475	0.473	0.461	0.457	0.452	0.441	0.45	0.461	0.129	0.151	0.152	0.528	0.535	0.56	0.328	0.314	0.298	0.108	0.161	0.159	0.439	0.441	0.47	0.423	0.421	0.425	0.103	0.102	0.103	0.101	0.104	0.102	0.511	0.519	0.512	0.421	0.389	0.415	0.103	0.105	0.103	0.105	0.106	0.106
2 days, 17:50:00	30.3	0.49	0.49	0.49	0.466	0.474	0.473	0.463	0.451	0.448	0.439	0.449	0.463	0.143	0.149	0.127	0.527	0.534	0.564	0.329	0.318	0.292	0.108	0.163	0.152	0.442	0.441	0.469	0.424	0.421	0.425	0.103	0.102	0.103	0.101	0.104	0.102	0.511	0.519	0.51	0.417	0.392	0.42	0.102	0.105	0.103	0.105	0.106	0.105
2 days, 18:00:00	30.3	0.491	0.49	0.492	0.467	0.473	0.474	0.462	0.456	0.452	0.447	0.447	0.463	0.142	0.146	0.142	0.529	0.534	0.562	0.33	0.315	0.298	0.109	0.161	0.149	0.442	0.441	0.467	0.422	0.418	0.422	0.103	0.102	0.103	0.101	0.104	0.102	0.51	0.518	0.511	0.413	0.388	0.416	0.103	0.105	0.103	0.105	0.106	0.105
2 days, 18:10:00	30.3	0.49	0.491	0.491	0.466	0.474	0.473	0.462	0.452	0.449	0.442	0.45	0.461	0.124	0.145	0.122	0.527	0.533	0.566	0.33	0.317	0.296	0.108	0.16	0.151	0.437	0.44	0.467	0.424	0.42	0.422	0.103	0.102	0.103	0.102	0.104	0.102	0.511	0.518	0.512	0.414	0.386	0.419	0.103	0.105	0.103	0.105	0.106	0.106
2 days, 18:20:00	30.2	0.491	0.491	0.491	0.465	0.472	0.474	0.461	0.453	0.449	0.44	0.448	0.461	0.149	0.121	0.124	0.524	0.533	0.566	0.33	0.32	0.294	0.108	0.179	0.145	0.439	0.44	0.468	0.425	0.419	0.424	0.103	0.102	0.103	0.101	0.104	0.102	0.511	0.517	0.512	0.418	0.386	0.421	0.102	0.105	0.103	0.105	0.106	0.106
2 days, 18:30:00	30.2	0.489	0.49	0.491	0.467	0.471	0.476	0.459	0.451	0.452	0.439	0.452	0.461	0.149	0.14	0.149	0.524	0.534	0.566	0.331	0.319	0.295	0.108	0.162	0.152	0.436	0.439	0.467	0.424	0.422	0.425	0.103	0.102	0.103	0.101	0.103	0.102	0.507	0.518	0.513	0.414	0.383	0.422	0.102	0.105	0.103	0.104	0.106	0.105
2 days, 18:40:00	30.2	0.489	0.49	0.491	0.466	0.472	0.476	0.459	0.452	0.45	0.439	0.45	0.461	0.133	0.13	0.156	0.523	0.533	0.565	0.335	0.318	0.294	0.109	0.162	0.15	0.437	0.441	0.467	0.424	0.42	0.422	0.103	0.102	0.103	0.102	0.104	0.102	0.51	0.516	0.51	0.417	0.387	0.423	0.102	0.105	0.103	0.105	0.106	0.105
2 days, 18:50:00	30.2	0.49	0.49	0.489	0.467	0.473	0.475	0.461	0.452	0.449	0.445	0.45	0.461	0.13	0.139	0.128	0.525	0.531	0.564	0.33	0.318	0.3	0.108	0.169	0.153	0.438	0.44	0.469	0.422	0.418	0.424	0.103	0.102	0.103	0.101	0.104	0.102	0.508	0.518	0.511	0.416	0.387	0.423	0.102	0.105	0.103	0.104	0.106	0.105
2 days, 19:00:00	30.2	0.491	0.488	0.489	0.468	0.475	0.475	0.458	0.452	0.452	0.446	0.448	0.461	0.146	0.151	0.136	0.528	0.531	0.566	0.335	0.319	0.299	0.109	0.161	0.16	0.437	0.44	0.466	0.421	0.418	0.425	0.103	0.102	0.103	0.101	0.103	0.102	0.507	0.518	0.509	0.415	0.388	0.421	0.102	0.105	0.103	0.104	0.106	0.105
2 days, 19:10:00	30.3	0.49	0.489	0.491	0.467	0.473	0.475	0.459	0.452	0.451	0.441	0.448	0.461	0.125	0.144	0.14	0.523	0.529	0.562	0.336	0.322	0.294	0.108	0.146	0.138	0.438	0.44	0.466	0.421	0.419	0.425	0.103	0.102	0.103	0.101	0.103	0.102	0.51	0.517	0.508	0.418	0.384	0.424	0.102	0.105	0.103	0.104	0.112	0.105
2 days, 19:20:00	30.3	0.489	0.49	0.491	0.467	0.474	0.472	0.461	0.453	0.452	0.445	0.449	0.461	0.144	0.126	0.154	0.524	0.531	0.564	0.335	0.321	0.296	0.108	0.167	0.165	0.437	0.439	0.466	0.422	0.418	0.425	0.103	0.102	0.103	0.101	0.104	0.102	0.508	0.518	0.508	0.418	0.387	0.425	0.102	0.105	0.103	0.104	0.117	0.105
2 days, 19:30:00	30.2	0.488	0.49	0.49	0.468	0.474	0.473	0.46	0.452	0.448	0.444	0.447	0.46	0.151	0.132	0.149	0.526	0.529	0.565	0.337	0.322	0.295	0.108	0.16	0.147	0.437	0.44	0.468	0.422	0.417	0.425	0.103	0.102	0.103	0.101	0.104	0.102	0.512	0.516	0.509	0.419	0.389	0.425	0.102	0.105	0.103	0.104	0.117	0.105
2 days, 19:40:00	30.2	0.488	0.49	0.492	0.468	0.475	0.473	0.459	0.453	0.449	0.439	0.445	0.46	0.14	0.149	0.126	0.526	0.524	0.565	0.336	0.319	0.294	0.108	0.171	0.149	0.439	0.439	0.465	0.421	0.417	0.425	0.103	0.102	0.103	0.101	0.104	0.102	0.51	0.516	0.509	0.421	0.385	0.423	0.102	0.105	0.103	0.105	0.117	0.105
2 days, 19:50:00	30.3	0.49	0.49	0.491	0.468	0.476	0.475	0.459	0.453	0.45	0.442	0.449	0.461	0.126	0.152	0.154	0.524	0.528	0.563	0.339	0.322	0.296	0.109	0.168	0.124	0.438	0.439	0.464	0.423	0.416	0.422	0.103	0.102	0.103	0.101	0.104	0.102	0.509	0.518	0.506	0.42	0.391	0.426	0.102	0.105	0.103	0.104	0.117	0.105
2 days, 20:00:00	30.3	0.49	0.491	0.491	0.467	0.475	0.474	0.46	0.452	0.449	0.439	0.449	0.46	0.151	0.125	0.141	0.522	0.523	0.56	0.337	0.326	0.294	0.109	0.169	0.144	0.437	0.438	0.465	0.42	0.415	0.422	0.103	0.102	0.103	0.101	0.104	0.102	0.509	0.517	0.507	0.421	0.394	0.426	0.102	0.105	0.103	0.104	0.117	0.105
2 days, 20:10:00	30.3	0.488	0.491	0.49	0.468	0.477	0.476	0.46	0.455	0.448	0.44	0.447	0.459	0.151	0.134	0.127	0.524	0.524	0.564	0.34	0.322	0.3	0.108	0.17	0.14	0.436	0.439	0.465	0.42	0.415	0.423	0.103	0.102	0.103	0.101	0.104	0.102	0.508	0.516	0.506	0.425	0.393	0.425	0.102	0.105	0.103	0.104	0.117	0.105
2 days, 20:20:00	30.3	0.488	0.49	0.491	0.467	0.476	0.476	0.459	0.455	0.451	0.441	0.447	0.46	0.141	0.151	0.136	0.527	0.524	0.562	0.337	0.325	0.302	0.109	0.168	0.147	0.438	0.439	0.466	0.419	0.414	0.424	0.103	0.102	0.103	0.102	0.104	0.102	0.507	0.514	0.509	0.421	0.394	0.426	0.102	0.105	0.103	0.104	0.117	0.105
2 days, 20:30:00	30.3	0.489	0.489	0.491	0.466	0.476	0.478	0.458	0.456	0.448	0.439	0.449	0.459	0.13	0.132	0.151	0.524	0.522	0.563	0.34	0.328	0.301	0.108	0.172	0.147	0.434	0.437	0.465	0.419	0.415	0.422	0.103	0.102	0.103	0.101	0.104	0.102	0.508	0.515	0.507	0.424	0.395	0.427	0.102	0.105	0.103	0.104	0.116	0.105
2 days, 20:40:00	30.3	0.488	0.489	0.491	0.47	0.477	0.476	0.458	0.458	0.451	0.446	0.446	0.46	0.127	0.147	0.123	0.527	0.525	0.563	0.343	0.326	0.301	0.108	0.172	0.15	0.437	0.44	0.461	0.42	0.414	0.424	0.103	0.102	0.103	0.101	0.103	0.102	0.511	0.515	0.507	0.426	0.396	0.424	0.102	0.105	0.103	0.104	0.117	0.105
2 days, 20:50:00	30.3	0.49	0.49	0.494	0.467	0.478	0.474	0.459	0.456	0.45	0.441	0.444	0.459	0.155	0.149	0.134	0.525	0.521	0.561	0.34	0.323	0.301	0.108	0.171	0.166	0.437	0.439	0.464	0.419	0.413	0.422	0.103	0.102	0.103	0.101	0.103	0.102	0.507	0.514	0.504	0.426	0.397	0.425	0.102	0.105	0.103	0.104	0.116	0.105
2 days, 21:00:00	30.3	0.488	0.491	0.491	0.47	0.478	0.474	0.459	0.452	0.451	0.44	0.448	0.46	0.15	0.139	0.138	0.522	0.521	0.562	0.343	0.329	0.303	0.109	0.158	0.157	0.436	0.438	0.462	0.419	0.415	0.42	0.103	0.102	0.103	0.101	0.104	0.102	0.507	0.514	0.506	0.424	0.396	0.428	0.102	0.105	0.103	0.105	0.117	0.105
2 days, 21:10:00	30.3	0.489	0.49	0.492	0.47	0.476	0.474	0.458	0.457	0.453	0.443	0.447	0.461	0.126	0.12	0.151	0.521	0.519	0.565	0.345	0.328	0.303	0.108	0.17	0.159	0.434	0.436	0.464	0.418	0.416	0.421	0.103	0.102	0.103	0.101	0.104	0.102	0.508	0.515	0.505	0.429	0.402	0.429	0.102	0.105	0.103	0.104	0.117	0.106
2 days, 21:20:00	30.3	0.488	0.489	0.492	0.471	0.478	0.474	0.46	0.458	0.453	0.444	0.446	0.459	0.13	0.149	0.157	0.522	0.52	0.563	0.344	0.326	0.302	0.109	0.156	0.147	0.436	0.438	0.463	0.418	0.413	0.422	0.103	0.102	0.103	0.101	0.104	0.102	0.51	0.512	0.503	0.43	0.403	0.427	0.102	0.105	0.103	0.105	0.117	0.105
2 days, 21:30:00	30.4	0.49	0.491	0.493	0.469	0.476	0.476	0.46	0.455	0.455	0.446	0.45	0.459	0.149	0.12	0.138	0.525	0.517	0.563	0.345	0.33	0.305	0.108	0.168	0.141	0.436	0.436	0.461	0.417	0.413	0.422	0.103	0.102	0.103	0.101	0.103	0.102	0.504	0.51	0.505	0.428	0.395	0.427	0.102	0.105	0.103	0.104	0.117	0.105
2 days, 21:40:00	30.4	0.488	0.489	0.492	0.473	0.475	0.474	0.461	0.46	0.455	0.445	0.449	0.459	0.148	0.124	0.154	0.523	0.522	0.563	0.346	0.328	0.302	0.108	0.159	0.154	0.436	0.438	0.463	0.42	0.416	0.424	0.103	0.102	0.103	0.101	0.104	0.102	0.506	0.512	0.504	0.429	0.4	0.427	0.102	0.105	0.103	0.105	0.117	0.106
2 days, 21:50:00	30.4	0.488	0.489	0.493	0.477	0.479	0.475	0.462	0.469	0.457	0.439	0.438	0.46	0.123	0.142	0.123	0.529	0.524	0.562	0.349	0.335	0.309	0.108	0.174	0.154	0.439	0.441	0.466	0.421	0.417	0.425	0.103	0.102	0.103	0.101	0.104	0.102	0.511	0.514	0.505	0.434	0.406	0.427	0.103	0.105	0.103	0.105	0.117	0.106
2 days, 22:00:00	30.4	0.489	0.486	0.492	0.476	0.48	0.474	0.461	0.461	0.456	0.447	0.448	0.46	0.133	0.122	0.138	0.523	0.524	0.561	0.348	0.333	0.305	0.108	0.176	0.151	0.437	0.44	0.463	0.419	0.415	0.423	0.103	0.102	0.103	0.101	0.103	0.102	0.505	0.513	0.503	0.429	0.398	0.428	0.103	0.105	0.103	0.105	0.115	0.106
2 days, 22:10:00	30.4	0.486	0.486	0.49	0.471	0.476	0.474	0.46	0.461	0.456	0.445	0.449	0.461	0.138	0.139	0.124	0.523	0.522	0.563	0.347	0.333	0.301	0.108	0.173	0.146	0.437	0.439	0.463	0.419	0.415	0.423	0.103	0.102	0.103	0.101	0.103	0.102	0.507	0.512	0.503	0.432	0.402	0.428	0.103	0.105	0.103	0.105	0.115	0.106
2 days, 22:20:00	30.5	0.487	0.487	0.49	0.471	0.475	0.474	0.459	0.454	0.457	0.441	0.446	0.459	0.15	0.13	0.133	0.525	0.519	0.564	0.352	0.332	0.301	0.108	0.169	0.142	0.436	0.435	0.463	0.418	0.415	0.421	0.103	0.102	0.103	0.101	0.103	0.102	0.505	0.512	0.504	0.43	0.397	0.429	0.103	0.105	0.103	0.105	0.115	0.106
00:00:00
00:00:00
00:00:00
00:00:00
00:00:00
00:00:00
00:00:00
00:00:00
00:00:00
00:00:00
[truncated: 48 more columns]
