# Supplementary material for: The metabolite-controlled ubiquitin conjugase Ubc8 promotes mitochondrial protein import
Source: Life Sci Alliance. 2022 Oct 17;6(1):e202201526. doi: 10.26508/lsa.202201526 (PMC9579816; doi:10.26508/lsa.202201526)
Supplement: Supplementary file 5 [file LSA-2022-01526_TableS1.xlsx]

## Sheet: S1_Legend
ID_ProteinGroup	Unique identifier for each Protein Group
Mitochondrial Localization	Reference list of yeast mitochondrial proteins obtained from (Morgenstern et al., 2017)
log2 ()	log2 fold change of protein intensities
-log10 p-value	Student's t-test p-value
p-value.adjusted	p-values were adjusted for multiple testing using the methods described by Benjamini and Hochberg (Benjamini and Hochberg, 1994)
WT_T0	Wild-type cells grown in 'light' lactate medium (≙t0)
UBC8_T0	Dubc8 cells grown in 'light' lactate medium (≙t0)
WT_LAC	Wild-type cells switched from 'light' lactate to 'heavy' lactate medium (≙t1L)
UBC8_LAC	Dubc8 cells switched from 'light' lactate to 'heavy' lactate medium (≙t1L)
WT_GLU	Wild-type cells switched from 'light' lactate to 'heavy' lactate + 2% glucose medium (≙t1D)
UBC8_GLU	Dubc8 cells switched from 'light' lactate to 'heavy' lactate + 2% glucose medium (≙t1D)
All quantifications were carried out with median normalized protein intensities.

## Sheet: Suppl. Table S1
ID_ProteinGroup	StdName	UniprotID	Mitochondrial Localization	log2 (WT_GLU / WT_T0)	-log10 p-value (WT_GLU / WT_T0)	p-value.adjusted (WT_GLU / WT_T0)	log2(UBC8_GLU / UBC8_T0)	-log10 p-value (UBC8_GLU / UBC8_T0)	p-value.adjusted (UBC8_GLU / UBC8_T0)	log2 (WT_LAC / WT_T0)	-log10 p-value (WT_LAC / WT_T0)	p-value.adjusted (WT_LAC / WT_T0)	log2 (UBC8_LAC / UBC8_T0)	-log10 p-value (UBC8_LAC / UBC8_T0)	p-value.adjusted (UBC8_LAC / UBC8_T0)
3196	ACS1	Q01574		-2.02157	9.23727	1.64685e-06	-0.898453	3.01284	0.00438923	-0.382226	2.8321	0.0448673	0.450145	3.1466	0.018561
635	MDH2	P22133		-5.92814	8.32874	6.67046e-06	-1.31413	3.82959	0.00135327	-0.808649	4.3022	0.00658638	-0.336572	1.30278	0.154672
597	KGD1	P20967	TRUE	-1.64246	7.88137	1.24578e-05	-1.3322	5.83864	0.000190106	-0.169409	2.55958	0.0637916	-0.508911	2.163	0.0486486
2254	YIL055C	P40523		-4.48548	7.25607	3.94273e-05	-2.48637	3.74186	0.0015069	-1.20792	2.75337	0.0476458	-0.316569	0.226057	0.719578
870	CMK1	P27466		-2.34195	7.10518	4.46458e-05	-1.27848	4.42305	0.000621874	-0.522459	1.91198	0.138156	-0.521433	0.969398	0.248405
899	ICL1	P28240		-3.61279	6.90326	5.07661e-05	-0.632925	3.46224	0.00219822	0.13381	0.653713	0.506575	0.511082	2.94871	0.0218781
181	HIP1	P06775		8.58642	6.94048	5.07661e-05	3.2385	1.52354	0.0550506	8.8444	7.22594	9.42076e-05	2.7932	1.17041	0.187028
1397	JEN1	P36035		-6.25456	6.68746	6.85078e-05	-1.83371	5.21596	0.000277189	-0.788463	3.37105	0.0244457	-0.654761	4.03537	0.00810905
2447	CIT3	P43635	TRUE	-2.0719	6.66395	6.85078e-05	-2.33066	4.80725	0.000429896	-0.780094	3.08573	0.0351637	-0.473229	2.35393	0.0402558
268	FBP1	P09201		-6.32859	6.36038	8.86118e-05	-0.227366	0.692525	0.267793	-0.35463	1.03935	0.344693	0.386368	1.12383	0.199801
3857	HBT1	Q07653		-4.45911	6.47873	8.86118e-05	-5.66644	3.30936	0.00277016	-0.126575	0.342263	0.710769	1.17829	0.764011	0.327455
4394	HBN1	Q96VH4	TRUE	-2.95789	6.45928	8.86118e-05	-1.5054	2.75056	0.00659992	-0.180359	0.335738	0.715881	-0.0426164	0.096745	0.867959
1965	FAA2	P39518		-2.18237	6.28739	8.86118e-05	-1.53329	4.4655	0.000601248	-0.579398	2.15819	0.10366	-0.276637	2.19843	0.0471378
1162	CAT2	P32796	TRUE	-2.08399	6.31112	8.86118e-05	-1.7103	4.72826	0.000471764	-0.460036	3.07155	0.0358464	-0.124405	0.302132	0.650677
2319	GPP1	P41277		2.36824	6.27599	8.86118e-05	2.95282	3.65952	0.00169824	0.234416	1.02676	0.348098	0.86402	1.02998	0.228608
3915	THI20	Q08224		2.83722	6.35664	8.86118e-05	0.884967	1.24374	0.0927718	-0.0875263	0.0766998	0.932539	-0.654478	0.981284	0.243984
1686		P38331		3.72201	6.42244	8.86118e-05	-1.10805	0.911201	0.175521	0.734487	0.808589	0.438775	NaN	NaN	NaN
1697	REI1	P38344		3.01823	6.24537	8.98012e-05	3.33478	3.74174	0.0015069	-0.214895	0.213694	0.810223	0.888303	0.799106	0.314264
320	RPS16B;RPS16A	P0CX52;P0CX51		0.942105	6.18028	9.88313e-05	1.07995	3.44121	0.002268	0.241877	2.55275	0.0639817	0.579784	1.78346	0.0812398
677	AMS1	P22855		-2.72604	6.14564	0.000101686	-1.92109	5.3505	0.000248041	-0.141897	0.463639	0.61931	-0.793856	2.32069	0.0421453
414	POX1	P13711		-2.66831	6.09808	0.000108052	-4.64226	2.99663	0.00450469	-0.562425	2.83818	0.0446732	0.0227113	0.0284845	0.959914
301	PBI2	P0CT04		-2.54361	6.01505	0.000114322	-1.23027	3.09509	0.00387837	-0.465253	2.16665	0.103248	-0.217466	0.613043	0.405033
63	SUC2	P00724		-2.10682	5.99819	0.000114322	-2.15038	3.918	0.00118714	1.45692	4.76566	0.00453129	0.464016	2.13763	0.0501732
3134	DNM1	P54861	TRUE	-1.88016	6.04032	0.000114322	-1.07183	3.52098	0.00202389	-0.450591	1.72715	0.167372	-0.42978	1.11647	0.202296
3435	ARX1	Q03862		1.89918	5.99786	0.000114322	2.07041	5.0109	0.000341754	0.0257211	0.0228774	0.978632	0.369002	0.941735	0.259093
351	PCK1	P10963		-2.39846	5.96335	0.000119015	-0.558937	2.75597	0.00654851	-0.13601	1.10971	0.317719	0.157383	0.892539	0.277605
336	SSA2	P10592	TRUE	2.27672	5.7327	0.000194926	1.98886	4.68247	0.000489508	-0.363182	1.40025	0.236196	-0.0816369	0.148393	0.805836
721	PHO3	P24031		7.67449	5.71019	0.000197961	4.78973	5.14014	0.000289516	1.50841	1.26785	0.266904	-0.402174	0.264876	0.685154
4261	PDH1	Q12428	TRUE	-1.81335	5.5872	0.000202414	-1.84536	5.37946	0.000247512	-0.528943	2.44163	0.0753458	-0.376949	1.97456	0.0642666
3221	FOX2	Q02207		-1.81055	5.63679	0.000202414	-1.34541	3.94146	0.00114367	-0.564438	2.13277	0.106138	-0.0304365	0.080541	0.889912
2358	XKS1	P42826		-1.58057	5.58301	0.000202414	-2.3857	3.09539	0.00387837	-0.043467	0.0814558	0.928898	-0.387503	0.573706	0.429525
568	YMR31	P19955	TRUE	-1.34669	5.62099	0.000202414	-1.19161	2.98995	0.00455727	-0.229671	1.17012	0.29766	-0.399375	0.683562	0.367586
923	IDH1	P28834	TRUE	-1.31908	5.57949	0.000202414	-0.604741	1.89253	0.0279742	0.0750952	0.244138	0.784608	0.333174	1.27088	0.162064
84	RAS2	P01120	TRUE	-0.909762	5.63792	0.000202414	-0.625874	1.49592	0.0579765	-0.195839	1.22046	0.282692	-0.0797219	0.146558	0.808355
4306	NOP58	Q12499		1.90028	5.63439	0.000202414	1.88314	4.85659	0.000415978	0.386067	2.13524	0.106017	0.328732	0.789593	0.317954
2928	SDA1	P53313		4.58913	5.64327	0.000202414	3.43483	2.68128	0.00733838	1.36384	0.816393	0.434681	1.4577	1.34535	0.144058
1089	DUR1,2	P32528		5.23853	5.59	0.000202414	NaN	NaN	NaN	0.646868	0.705953	0.479738	0.819901	0.659101	0.382131
66	HIS4	P00815		2.01261	5.55645	0.000207822	3.68817	4.51485	0.000565789	-0.245368	0.482324	0.60557	0.244864	0.372894	0.583765
985	GUT2	P32191	TRUE	-1.74002	5.54024	0.000210197	-1.43242	5.53506	0.000199594	-0.205119	0.877843	0.405375	-0.445323	2.01734	0.0603776
2071	YAT2	P40017		-2.36256	5.52571	0.000211913	-1.42699	2.99764	0.00449989	-0.414433	1.34612	0.241566	0.330361	1.39582	0.135555
990	GLN1	P32288		1.91681	5.51013	0.000214299	2.03116	4.58171	0.000541957	0.337416	1.81062	0.156137	0.402678	1.38292	0.137535
783	TRX3	P25372	TRUE	-2.6314	5.49736	0.000215436	-1.46723	4.88913	0.000406445	-0.238776	0.759579	0.454038	-0.0309587	0.105678	0.856322
4046	ICL2	Q12031	TRUE	-2.00555	5.47127	0.000223455	-1.68978	5.24344	0.000270832	-0.546673	1.6939	0.173363	-0.0928526	0.318288	0.635534
214	CPA1	P07258		6.1102	5.45662	0.000225868	NaN	NaN	NaN	NaN	NaN	NaN	NaN	NaN	NaN
4155	LSP1	Q12230		-0.984216	5.44423	0.000227242	-0.647685	2.40304	0.011644	-0.239964	1.23466	0.27853	-0.0971279	0.278603	0.67321
1235	SFC1	P33303	TRUE	-2.60704	5.40012	0.000228516	-2.82343	4.01395	0.00103469	-0.36636	1.5333	0.204053	-0.451378	2.02189	0.0598704
70	CIT1	P00890	TRUE	-0.988868	5.38744	0.000228516	-0.651816	2.41463	0.0114414	0.0905514	1.02983	0.347627	0.0527534	0.159924	0.793194
4095	LYS21	Q12122		1.36085	5.39468	0.000228516	1.02281	3.52433	0.00201866	-0.00864697	0.0610088	0.946503	-0.0824938	0.693921	0.361831
3369	HAS1	Q03532		2.17097	5.40677	0.000228516	2.17165	4.16776	0.000828067	0.437885	1.28085	0.262717	0.314384	0.34396	0.610863
2096	SER3	P40054		3.3743	5.42687	0.000228516	3.06345	4.10215	0.000900759	0.501436	0.70276	0.481305	1.19456	1.62714	0.0985833
1574	GPX2	P38143	TRUE	4.53466	5.41401	0.000228516	NaN	NaN	NaN	NaN	NaN	NaN	NaN	NaN	NaN
3174	SDH1	Q00711	TRUE	-1.78029	5.34272	0.000241763	-1.39161	4.84137	0.000419405	-0.23199	1.48637	0.216856	-0.388679	1.51675	0.115486
3903	MDM38	Q08179	TRUE	-1.15529	5.33815	0.000241763	-1.41879	5.21313	0.000277189	-0.451974	1.55312	0.199642	-0.998847	2.70624	0.0280515
352	RPA190	P10964		1.68566	5.35053	0.000241763	0.821656	3.83107	0.00135327	0.27644	0.358646	0.694385	-0.385639	0.472704	0.499435
663	MRPL20	P22354	TRUE	-2.06237	5.3218	0.000246474	-2.23975	2.79724	0.00615186	-0.215691	0.746811	0.460427	-1.01303	0.859907	0.288211
984	GUT1	P32190	TRUE	-2.60844	5.30189	0.000252835	-2.56605	4.21855	0.000786766	-0.83415	2.19513	0.101365	-0.685021	2.56585	0.0326827
218	GDH1	P07262		1.04295	5.29522	0.000252835	1.96895	7.71061	3.46392e-05	0.406527	4.24796	0.00688852	0.89303	5.23055	0.00215866
605	PWP1	P21304		1.71787	5.25415	0.00027312	2.39533	5.57406	0.000190106	0.446503	2.03274	0.119504	0.737953	1.9874	0.0627657
640	RPA135	P22138		1.39924	5.21792	0.000291846	1.38152	4.077	0.000922588	0.12315	0.737282	0.465865	-0.273512	0.640213	0.39165
2449	MHP1	P43638		-2.9905	5.19116	0.000296101	-2.68142	3.55648	0.00194858	-1.11753	2.88562	0.0437341	-0.875081	1.10807	0.20519
3776	GDB1	Q06625		-2.14431	5.18434	0.000296101	-1.08394	3.93556	0.00115607	-0.0593333	0.154354	0.863392	0.0769868	0.11168	0.849659
1006	PSE1	P32337		1.40255	5.19527	0.000296101	1.61938	4.51844	0.000565789	0.50753	1.74492	0.164839	0.666882	1.85967	0.0747525
174	DED1	P06634		1.40867	5.18315	0.000296101	1.36376	5.03455	0.000341754	0.243907	0.899033	0.397189	0.461983	1.93255	0.0673463
3012	GOR1	P53839		-1.618	5.15749	0.000309211	-0.255477	0.832864	0.202953	-0.487821	2.30539	0.0886531	0.802773	3.19603	0.0181532
2693	IMD4	P50094		2.13359	5.12739	0.000326309	2.83907	5.11276	0.000301585	0.527878	1.36913	0.239652	0.91341	1.57724	0.105573
637	ATP12	P22135	TRUE	-2.33626	5.10822	0.000330855	-2.33467	2.34449	0.0127846	-0.244277	0.758294	0.454038	-0.57045	0.323153	0.630777
3208	KIN4	Q01919		6.31481	5.11144	0.000330855	NaN	NaN	NaN	6.61675	4.79539	0.00453129	4.79034	2.97318	0.0214627
4304	FMP16	Q12497	TRUE	-3.12489	5.05591	0.000367711	-1.8066	1.17085	0.107068	-0.909293	1.15911	0.300222	0.0729485	0.0368749	0.948521
991	ACH1	P32316	TRUE	-1.73014	5.02122	0.000392521	-1.44287	3.53833	0.00199722	-0.288708	1.46758	0.220885	-0.483838	1.80134	0.0798832
1211	ATO2	P32907		-3.15481	4.983	0.000399663	-1.85996	4.56183	0.000545002	-1.04854	3.15394	0.0327242	-0.925817	2.33017	0.0417274
3297	ODC1	Q03028	TRUE	-2.19805	4.98472	0.000399663	-2.24407	4.08422	0.000917196	-0.36201	0.89223	0.401466	-0.760659	2.21928	0.0461879
258	QCR8	P08525	TRUE	-1.44851	4.98551	0.000399663	-0.715404	1.47965	0.059885	-0.883249	1.96352	0.131897	0.077239	0.0935669	0.873104
251	FUM1	P08417	TRUE	-1.3664	4.98979	0.000399663	-0.779076	3.6288	0.00177201	-0.178956	0.70957	0.477771	-0.194939	1.50647	0.116556
982	ARO7	P32178		1.41006	4.99201	0.000399663	1.88908	3.04106	0.00422033	0.0188169	0.0335152	0.971291	1.36418	2.03141	0.0592999
2828	MPC1	P53157	TRUE	-2.6294	4.96831	0.000406667	-3.34427	1.90225	0.0275406	-0.44451	0.575162	0.540612	NaN	NaN	NaN
209	ATP1	P07251	TRUE	-0.98479	4.94961	0.000406667	-0.776195	4.09952	0.000901053	-0.142046	1.57653	0.194556	-0.285092	2.38651	0.039026
4044	FSF1	Q12029	TRUE	0.443721	4.95606	0.000406667	-0.605403	1.40015	0.0693773	0.472286	1.87847	0.144681	-0.831406	1.70976	0.0893881
4314	ZPS1	Q12512		6.67168	4.94706	0.000406667	NaN	NaN	NaN	1.84853	1.95504	0.133172	NaN	NaN	NaN
3063	AAH1	P53909		6.91792	4.94826	0.000406667	NaN	NaN	NaN	NaN	NaN	NaN	NaN	NaN	NaN
1250	GDH2	P33327		-1.8099	4.93855	0.000409536	-1.09075	4.69141	0.000485968	-0.299626	3.54969	0.0190225	0.103872	0.766771	0.327216
904	URA7	P28274		1.47778	4.92681	0.000415557	1.98762	5.36648	0.000248041	-0.0326548	0.0641482	0.944306	0.045898	0.144009	0.812217
1675	SDS24	P38314		-2.7735	4.92093	0.000416091	-1.79098	2.84267	0.00567928	-0.674577	2.36736	0.0830542	-0.102216	0.160004	0.793194
3150	YAT1	P80235	TRUE	-2.08716	4.90766	0.000423835	-1.75725	5.82692	0.000190106	-0.420896	2.83914	0.0446732	0.120592	0.408372	0.552544
3109	IDP3	P53982		-2.3397	4.88455	0.000441159	-2.13267	2.29172	0.0140609	-0.775959	2.86024	0.0437341	-0.211073	0.345368	0.609152
3007	SNZ2;SNZ3	P53824;P43545		-1.08654	4.87799	0.000441159	-0.364707	1.38937	0.0708432	0.303185	1.69967	0.173345	-0.296038	0.445008	0.521133
1051	HXT3	P32466		6.81293	4.87484	0.000441159	NaN	NaN	NaN	NaN	NaN	NaN	NaN	NaN	NaN
3520	SDH7	Q04401	TRUE	-1.55477	4.86713	0.000443894	-0.694845	1.15867	0.109348	0.183195	0.715069	0.475431	0.509498	1.15142	0.19278
4096	DCS2	Q12123		-1.5876	4.85182	0.000452223	-0.505069	0.605439	0.315442	0.345917	0.901754	0.395681	1.15193	2.0505	0.0580012
2127	GPP2	P40106		2.31557	4.84919	0.000452223	4.07401	4.19804	0.000807934	2.09122	4.50156	0.0055492	2.94534	2.64081	0.0297458
3193	COX12	Q01519	TRUE	-1.22785	4.83576	0.000457893	-0.849338	2.96259	0.00475251	-0.0971041	0.235214	0.79225	0.0439057	0.131628	0.829009
486	YEF3	P16521		1.30464	4.83412	0.000457893	1.60853	7.15315	5.0013e-05	0.266644	1.40331	0.236067	0.25062	0.95462	0.254136
4019	NEW1	Q08972		1.21604	4.79765	0.000492596	1.43973	5.85719	0.000190106	-0.215322	1.20472	0.285502	0.585421	2.20854	0.0468047
3049	BNI5	P53890		1.70207	4.79171	0.000494012	0.938891	5.01949	0.000341754	0.644693	2.1719	0.102588	0.143789	0.225487	0.719578
872	NSR1	P27476		1.69236	4.78575	0.000495508	2.01315	3.12558	0.00369608	-0.0043664	0.00820668	0.993011	0.154333	0.163539	0.790074
4213	HSP42	Q12329		-1.55192	4.7774	0.000499809	-1.32027	2.81956	0.00592254	-0.473771	2.06618	0.115338	-0.902994	1.83019	0.0766357
1386	MAE1	P36013	TRUE	2.01014	4.75886	0.00051618	2.79706	4.7597	0.000454958	0.0880322	0.123602	0.889861	0.21955	0.275532	0.676022
1050	HXT1	P32465		6.22996	4.75389	0.000516736	NaN	NaN	NaN	NaN	NaN	NaN	NaN	NaN	NaN
273	ATP5	P09457	TRUE	-1.06696	4.72646	0.000528622	-0.652118	2.46547	0.0105293	-0.0801868	0.43117	0.642911	-0.1245	0.5785	0.427043
4230	WTM1	Q12363		-0.95765	4.72926	0.000528622	-0.987746	4.47202	0.000601248	-0.229435	1.55764	0.199302	0.0549698	0.276698	0.674768
2128	SSB2	P40150		0.897302	4.7369	0.000528622	1.44972	5.19311	0.000277189	0.0685463	0.285928	0.756009	0.285572	1.49147	0.118634
1234	PDR5	P33302		3.60395	4.7334	0.000528622	0.873886	2.87755	0.00541302	-0.0118203	0.0085798	0.993011	0.0362568	0.083621	0.886091
1375	SWH1	P35845		-2.33489	4.69746	0.000548822	-1.90959	3.49635	0.00207958	-0.608908	2.53783	0.0651636	-0.212061	1.24505	0.168234
2946	PXR1	P53335		3.08111	4.69829	0.000548822	3.09953	3.61031	0.0018009	0.285708	0.314708	0.732407	NaN	NaN	NaN
2798	ARI1	P53111		6.43828	4.69993	0.000548822	NaN	NaN	NaN	1.81182	1.35504	0.240539	NaN	NaN	NaN
892	RPC19	P28000		0.829519	4.69076	0.000552047	1.12591	2.31235	0.0135302	-0.022522	0.0685381	0.939721	0.417413	0.718639	0.348864
858	CDC60	P26637		1.08208	4.68413	0.000555257	1.46712	4.92385	0.000385447	0.201002	0.790938	0.442825	0.447117	1.67627	0.0934941
2429	IGD1	P43598		-2.49452	4.66927	0.000558767	-0.951571	1.39676	0.0698171	-0.0924935	0.241659	0.786356	0.429885	0.872529	0.283839
1518	QCR10	P37299	TRUE	-1.25622	4.67698	0.000558767	-1.414	2.00772	0.0230088	-0.155834	1.33262	0.245225	-0.953886	1.80909	0.0791741
2998	NOG2	P53742		2.67526	4.67144	0.000558767	1.45488	3.81112	0.00137075	0.62835	1.40226	0.236067	-0.226347	0.416212	0.547117
2435	OSW7	P43611		-3.90573	4.64864	0.000580632	-2.97637	4.5131	0.000565789	-2.02369	3.79856	0.0129252	-3.3203	1.28629	0.158001
1520	GLY1	P37303		4.02798	4.6413	0.000585205	1.27441	4.2654	0.000745597	0.813055	1.30097	0.255576	0.524902	1.72756	0.0876249
213	QCR2	P07257	TRUE	-1.11732	4.63321	0.000585656	-0.998383	4.70173	0.000485968	0.115845	0.566512	0.547483	-0.238351	1.61059	0.100921
2694	IMD3	P50095		1.02489	4.63539	0.000585656	1.67527	2.94495	0.00490742	-0.116271	0.599146	0.529078	0.534786	0.849443	0.292268
975	HSP104	P31539		-0.811531	4.61578	0.000599031	-0.581706	3.22322	0.00315741	-0.109326	0.672084	0.497453	0.0199556	0.0933766	0.873179
2663	ASN1	P49089		1.41631	4.61689	0.000599031	1.90351	4.52359	0.000565789	-0.00816917	0.0237201	0.978546	0.232739	0.526426	0.46109
1510		P37263		2.85044	4.59529	0.000622567	1.45692	3.00189	0.00447856	1.25942	2.2983	0.0892346	-0.559643	0.49297	0.483417
168	LEU4	P06208	TRUE	-0.784081	4.58762	0.000628232	-0.655678	5.89452	0.000190106	-0.0726795	0.357041	0.696259	-0.268543	1.1728	0.186678
3998	UIP4	Q08926		-2.46072	4.58175	0.000631397	-1.24759	2.85446	0.00557809	-0.916617	3.24676	0.0293568	0.111083	0.304165	0.649014
883	POT1	P27796	TRUE	-1.82718	4.57653	0.000632842	-1.75057	3.30832	0.00277241	-0.440459	1.95524	0.133172	-0.174534	0.374834	0.582324
2884	SLX9	P53251		2.61181	4.57345	0.000632842	NaN	NaN	NaN	0.272352	0.692299	0.485664	NaN	NaN	NaN
178	GPH1	P06738		-1.96259	4.5508	0.000647765	-1.52673	3.61677	0.00179055	-0.125289	0.537293	0.569109	0.348796	1.04292	0.224218
3850		Q07551		-1.58097	4.55211	0.000647765	-0.286716	1.03628	0.137863	-0.0756845	0.224269	0.802474	1.37996	3.30938	0.0165101
197	CYT1	P07143	TRUE	-1.38409	4.55561	0.000647765	-1.25226	4.10105	0.000900759	-0.18505	1.2408	0.276716	-0.532065	2.17369	0.0483387
713	EXG1	P23776		2.11084	4.54909	0.000647765	2.15324	2.09066	0.0198057	0.54946	1.20497	0.285502	1.42224	1.66267	0.0952638
1377	RPS27B;RPS27A	P38711;P35997		1.48168	4.53753	0.000659915	1.16912	3.71371	0.00157727	0.439566	1.63891	0.182462	0.271074	1.17294	0.186678
1067	LYP1	P32487		5.22214	4.53324	0.000661178	-0.116671	0.0453338	0.919485	NaN	NaN	NaN	0.282567	0.183396	0.768588
3154	TIM11	P81449	TRUE	-0.854018	4.52608	0.000666876	-0.616448	4.91178	0.000392737	0.0448923	0.308113	0.737819	0.0259275	0.0758804	0.896777
240	RPC40	P07703		1.13293	4.51827	0.000668458	0.723098	3.76645	0.00146442	0.263171	1.33866	0.243461	-0.113124	0.361132	0.595528
329	ADH4	P10127	TRUE	5.79066	4.51886	0.000668458	NaN	NaN	NaN	NaN	NaN	NaN	NaN	NaN	NaN
3227	UTP6	Q02354	TRUE	2.24333	4.50501	0.000683874	0.75472	1.87285	0.0289159	-0.0236497	0.0387803	0.968454	-1.09446	0.929016	0.263497
1540	ETR1	P38071	TRUE	-1.33684	4.50077	0.000685313	-1.15166	4.4536	0.000601921	-0.485217	2.39701	0.0809371	-0.193136	0.882222	0.279654
1107	CYS4	P32582		0.932208	4.47833	0.000710802	1.95839	4.93225	0.000385062	0.175819	1.82893	0.152608	1.02164	3.16682	0.0185481
585	DBP3	P20447		1.73454	4.47917	0.000710802	1.14212	3.27085	0.0029415	0.188874	0.629122	0.514244	0.175788	0.497756	0.479995
2134		P40159		-1.92007	4.46564	0.000715729	-1.22304	2.30753	0.0136492	-0.275914	0.705827	0.479738	0.271088	0.301556	0.651257
212	COR1	P07256	TRUE	-1.03004	4.46902	0.000715729	-0.836835	5.51099	0.000206985	0.0460596	0.362454	0.692464	-0.42627	3.92145	0.0094601
3071	NAF1	P53919		4.01153	4.46641	0.000715729	NaN	NaN	NaN	NaN	NaN	NaN	NaN	NaN	NaN
249	RIP1	P08067	TRUE	-1.15542	4.44595	0.000743464	-1.44495	5.26893	0.000266131	0.161133	1.2362	0.27853	-0.782633	2.79248	0.0268385
517	GRX2	P17695	TRUE	-2.2208	4.416	0.000790772	-0.944422	3.77326	0.00144512	-0.0431404	0.110255	0.898932	0.163592	0.637604	0.392942
35	YBR085C-A	O43137		-4.07308	4.41197	0.000792319	NaN	NaN	NaN	-0.369923	1.0122	0.356249	NaN	NaN	NaN
276	LPD1	P09624	TRUE	-1.20478	4.4089	0.000792319	-0.936205	5.67345	0.000190106	-0.196301	0.918218	0.390912	-0.396251	2.91602	0.0227794
1506	PGM2	P37012		-1.35833	4.40208	0.000793759	-0.510291	1.86351	0.029384	-0.112758	0.404796	0.666029	0.493342	1.73412	0.086705
1168	ZRT1	P32804		6.30287	4.40195	0.000793759	NaN	NaN	NaN	NaN	NaN	NaN	NaN	NaN	NaN
4260	STB3	Q12427		-2.69186	4.39098	0.000802759	-2.86939	2.33673	0.0129406	0.0170274	0.0276636	0.977665	0.482511	0.367694	0.588952
875	CPS1	P27614		-1.28778	4.39267	0.000802759	-0.362767	0.823128	0.206592	-0.228654	1.68389	0.173402	0.73765	1.46406	0.122733
1265	HSP78	P33416	TRUE	-1.45309	4.37828	0.000804249	-1.52855	6.22016	0.000184285	-0.471373	1.92737	0.136446	-0.680638	2.85375	0.0246387
1840	ARO9	P38840		-1.03246	4.38064	0.000804249	-0.209538	0.864007	0.191587	-0.109704	0.560135	0.551371	0.847355	5.50684	0.00191688
2456	ALD4	P46367	TRUE	-0.786981	4.38646	0.000804249	-0.473448	3.58775	0.00185969	0.0420618	0.244485	0.784608	0.269232	2.82045	0.0255793
1524	NOP4	P37838		2.8557	4.3837	0.000804249	1.67514	3.28212	0.00289434	0.129173	0.183255	0.835454	-0.265025	0.350452	0.603916
1591		P38172	TRUE	-2.64204	4.37317	0.000808307	-2.76322	3.46408	0.00219461	-0.785439	0.78678	0.443477	-1.26312	1.88398	0.0719473
3709	MMS1	Q06211		6.68845	4.36986	0.000809049	4.28977	2.69901	0.00715115	6.63786	4.4043	0.00595027	5.31922	3.79713	0.0100652
128	POR1	P04840	TRUE	-0.837784	4.36437	0.000813924	-0.952934	4.50385	0.000574855	0.0762939	0.583477	0.537457	-0.383391	2.43435	0.0368703
2838	SDS23	P53172		-1.37487	4.35426	0.000816861	-1.32304	4.08675	0.000916278	-0.410419	1.68337	0.173402	-0.330871	1.15934	0.190653
2307	PHB1	P40961	TRUE	-1.16642	4.35432	0.000816861	-1.27471	4.28366	0.000728977	0.243328	0.881691	0.403748	-0.364716	1.46451	0.122733
2250	FIS1	P40515	TRUE	-1.02961	4.35728	0.000816861	-0.785042	1.36627	0.073699	-0.0500789	0.185016	0.833809	0.121331	0.176517	0.775128
2377	TDA10	P42938		-1.78589	4.34279	0.000818118	-0.0423336	0.0577347	0.897205	-0.834813	1.38949	0.237839	1.06438	2.28936	0.0434887
2469	AIP1	P46680		-0.847022	4.34246	0.000818118	0.0237308	0.0646266	0.886142	-0.18726	0.705921	0.479738	0.227272	0.935216	0.26109
1723	GUA1	P38625		0.8809	4.34854	0.000818118	1.36285	4.51633	0.000565789	-0.1774	1.05508	0.336687	0.00458813	0.00993881	0.986021
3665	THI7	Q05998		3.27675	4.34748	0.000818118	1.64293	1.91644	0.0269554	-0.571692	0.589715	0.535477	-1.38039	1.31782	0.150369
4270	RTN2	Q12443		-2.44682	4.31959	0.000832494	-4.77313	2.33991	0.0128997	-0.189357	0.992182	0.363057	-0.0256529	0.0142975	0.97864
3535		Q04471		-2.4061	4.32809	0.000832494	-1.41128	1.92566	0.0265385	-0.647904	0.977155	0.368787	0.318794	0.334492	0.620264
1930	HXT7;HXT6	P39004;P39003		-1.71098	4.32483	0.000832494	-0.695688	1.4616	0.0619531	-0.257648	0.597988	0.529078	0.218269	0.537762	0.454685
80	PAI3	P01094		-1.45236	4.32807	0.000832494	-1.85294	0.593649	0.322279	-0.257424	0.577769	0.540354	1.3966	0.568827	0.43302
355	PYC1	P11154		-1.22124	4.32086	0.000832494	-0.7093	4.39172	0.000650326	-0.213439	1.32929	0.245966	-0.0640106	0.444859	0.521133
2280	AIM21	P40563		-0.747646	4.3187	0.000832494	0.0473261	0.073971	0.870045	-0.0855002	0.64908	0.508853	0.216028	0.358095	0.597055
2125	FMP10	P40098	TRUE	-1.57111	4.3158	0.00083301	-1.66574	5.00853	0.000341754	-0.275901	1.0944	0.320624	-0.655538	2.59176	0.0314034
374	INO1	P11986		-0.975435	4.29671	0.000862223	-0.239541	0.216032	0.668185	0.127239	0.801412	0.441518	1.12831	1.3457	0.144058
306	RPL20B;RPL20A	P0CX24;P0CX23		1.52311	4.29559	0.000862223	1.18843	4.60453	0.00053718	0.547729	1.67523	0.17436	0.383099	1.76303	0.0832993
4047	AIM41	Q12032	TRUE	-1.94153	4.28901	0.000870173	-1.48786	5.19138	0.000277189	-0.223136	0.622283	0.518111	-0.15234	0.674727	0.373093
2405	AGX1	P43567		-1.8077	4.27336	0.000896775	-1.82366	4.68461	0.000489508	-0.388362	1.79118	0.158842	-0.600281	1.83482	0.0765287
1131	UTR2	P32623	TRUE	2.71436	4.26469	0.000904166	0.995251	0.403439	0.467496	0.280688	0.266484	0.767922	0.48106	0.155008	0.797454
2669	LYS4	P49367	TRUE	2.73615	4.26558	0.000904166	1.60095	2.48232	0.010208	-0.815668	1.23402	0.27853	-1.13887	2.4311	0.0368703
707	MIR1	P23641	TRUE	-0.975065	4.26021	0.000908223	-0.923347	3.26787	0.00295352	0.00451088	0.0184249	0.981955	-0.328231	1.39252	0.136079
1511	CBP4	P37267	TRUE	-2.97086	4.25172	0.000920799	-0.85393	0.897955	0.1798	NaN	NaN	NaN	-0.0715437	0.0278675	0.960943
3639	MSC3	Q05812		-1.83761	4.24823	0.000922896	-1.44468	3.31263	0.00275374	-0.418695	1.31917	0.249613	-0.481869	1.42461	0.130956
732	DBP1	P24784		-3.03356	4.22451	0.000960416	-1.6583	1.09706	0.122664	-0.527664	1.80351	0.157213	0.897179	0.772657	0.325363
4351	YBL029C-A	Q3E756		-1.85131	4.2235	0.000960416	-1.92657	3.8849	0.00126027	-0.447181	0.794204	0.442825	-1.21512	2.5121	0.034309
3522	EMI2	Q04409		-1.42532	4.2248	0.000960416	-0.967472	2.29159	0.0140609	-0.087203	0.243739	0.784608	0.254496	0.544891	0.450441
264	CIT2	P08679	TRUE	-4.48454	4.20262	0.000966358	-5.40801	2.95796	0.00479757	-0.466894	1.38064	0.239046	1.93877	1.62739	0.0985833
1588	ECM21	P38167		-2.52889	4.21719	0.000966358	-2.79627	3.53947	0.00199722	-0.819756	2.05128	0.116885	-0.710914	2.28171	0.0436467
1500	MRPL17	P36528	TRUE	-1.83898	4.21557	0.000966358	-2.15767	3.24269	0.00305521	-0.254794	0.381569	0.682587	-1.09467	1.19812	0.180562
1249	YKL091C	P33324		-1.47206	4.21222	0.000966358	-2.05195	5.00949	0.000341754	-0.210479	0.458768	0.622926	-0.647131	1.38044	0.137876
3194	LAP3	Q01532		-1.36333	4.20452	0.000966358	-0.285471	0.937159	0.166881	-0.619722	2.04335	0.11806	0.386261	1.72604	0.0877985
0	YPR010C-A	A5Z2X5	TRUE	-1.11329	4.20477	0.000966358	-0.966408	3.50312	0.00206865	-0.236362	0.421761	0.649974	-0.45399	1.50435	0.116716
3372	OYE2	Q03558	TRUE	1.18613	4.2075	0.000966358	1.57145	4.81918	0.00042152	0.183432	0.541256	0.565859	0.617705	1.9985	0.0617935
58	HIS1	P00498		2.97591	4.20162	0.000966358	4.48895	3.63224	0.00176927	-0.210023	0.234522	0.792858	0.873916	0.792001	0.317002
1517	SDH4	P37298	TRUE	-2.45114	4.18989	0.000987484	-1.72235	3.03697	0.00423824	-0.350636	0.63811	0.509721	-0.355637	1.14244	0.195938
3306	MSC1	Q03104	TRUE	-1.51328	4.1733	0.00101502	-1.82177	5.78948	0.000190106	-0.00118351	0.00744804	0.993654	-0.28467	1.7405	0.0860926
1383	TEF4	P36008		0.899135	4.17561	0.00101502	1.19117	3.61607	0.00179055	0.0801506	0.233289	0.793687	0.35311	1.50394	0.116716
669	CMK2	P22517		-1.47155	4.16241	0.00102984	-1.3682	4.23845	0.000766687	-0.797835	2.97584	0.0408702	-0.531233	1.10025	0.207676
2355	IDP2	P41939		-1.13972	4.16454	0.00102984	-0.35913	2.51959	0.00958578	0.048831	0.212842	0.81059	0.473968	2.5517	0.0333232
45	CYB2	P00175	TRUE	-1.47315	4.15658	0.00103829	-0.988315	4.33071	0.000707822	0.0345459	0.107262	0.900133	-0.455105	3.17312	0.0185481
1698	SDH8	P38345	TRUE	-3.0724	4.15057	0.00104184	-1.20557	2.65535	0.00765922	0.266424	0.998396	0.361253	1.05245	2.88296	0.0239961
1161	YME1	P32795	TRUE	-1.51902	4.15066	0.00104184	-2.31809	3.76261	0.00147034	-0.11914	0.13423	0.883849	-1.11234	2.03551	0.0592999
2290	HYR1	P40581	TRUE	-0.778872	4.13819	0.00106644	-1.54099	2.33854	0.01292	0.0922003	1.21558	0.28302	-0.735615	1.12898	0.198659
166	CYC3	P06182	TRUE	-2.03858	4.13273	0.00106724	-1.1753	2.71924	0.00697733	-0.201569	0.444494	0.633781	-0.28978	0.661912	0.38062
52	COX2	P00410	TRUE	-1.86048	4.12907	0.00106724	-1.86393	4.18453	0.000815105	-0.288543	1.36955	0.239652	-0.737399	2.41934	0.0369837
516	UGA1	P17649		-1.06996	4.13312	0.00106724	-0.445422	2.17448	0.0171829	1.16597	2.77189	0.0469227	0.302966	0.222123	0.723162
3703	NMA1	Q06178		1.78438	4.129	0.00106724	2.02686	2.22568	0.0157914	1.72366	4.63627	0.0055492	1.42332	1.57947	0.105169
114	LEU2	P04173		3.61667	4.12321	0.00107613	0.672696	0.423931	0.448937	1.49122	2.15371	0.103978	-1.07001	2.18889	0.0473409
3989	FDH1	Q08911		-1.83996	4.10183	0.00112479	NaN	NaN	NaN	-0.387403	0.644789	0.508853	NaN	NaN	NaN
611	OSM1	P21375	TRUE	-1.0995	4.09811	0.00112883	-0.398154	1.53359	0.054042	0.0731425	0.177136	0.841956	-0.303318	0.657432	0.382613
339	SAM1	P10659		2.93444	4.08789	0.00114999	1.81685	7.21479	5.0013e-05	0.564643	0.957428	0.376371	0.177825	0.677185	0.371473
1534	APL3	P38065		1.67379	4.08148	0.00116132	0.207484	0.132668	0.779027	2.69814	3.936	0.0104952	0.903682	1.2777	0.160204
4015	FMP40	Q08968	TRUE	-3.59223	4.06575	0.00119241	-3.27117	3.57537	0.0019032	-0.547885	0.622687	0.517985	-0.974544	1.13479	0.197502
4200	SMT3	Q12306		-1.38839	4.06702	0.00119241	-0.424859	1.26594	0.0890865	-0.0708933	0.175649	0.843496	0.134474	0.260914	0.689134
3867	PUF3	Q07807	TRUE	-1.68078	4.06217	0.00119646	-2.02949	4.1796	0.000819822	0.137467	0.424817	0.648133	0.0356479	0.0662478	0.911515
979	MLF3	P32047		4.83811	4.05653	0.00120623	NaN	NaN	NaN	NaN	NaN	NaN	1.3117	1.66929	0.0944635
2576	NPA3	P47122		1.00861	4.05082	0.00121631	0.821188	2.76017	0.00651442	-0.218462	0.954062	0.377673	0.627955	2.82651	0.0253643
400	KIN1	P13185		-3.10339	4.04498	0.00122103	-2.5633	4.05655	0.000958151	-1.01824	1.54702	0.199866	-1.34486	1.62458	0.0988968
1801	DYS1	P38791		1.64038	4.04518	0.00122103	2.42583	5.64815	0.000190106	0.42283	1.60717	0.184724	0.89577	3.14426	0.018561
1773	YAP3	P38749		-5.71041	4.04245	0.00122237	-3.50828	1.02976	0.139493	-5.07414	7.50331	9.42076e-05	-1.26983	0.235551	0.712013
3893	BUD20	Q08004		4.28047	4.03697	0.00123204	4.07953	4.3745	0.000667606	NaN	NaN	NaN	NaN	NaN	NaN
2442	BNA6	P43619		-0.650172	4.02914	0.00124856	1.14054	1.78775	0.0337428	-0.332466	1.25585	0.270997	1.17657	1.51639	0.115486
2034	SAH1	P39954		0.846552	4.02208	0.00126309	1.51507	5.92099	0.000190106	0.155213	0.758154	0.454038	0.714609	4.17361	0.00711879
2554	MPP10	P47083		1.37894	4.01973	0.00126404	0.748796	1.26574	0.0890865	0.0827765	0.194092	0.826551	-0.822778	0.891427	0.278004
553	ACO1	P19414	TRUE	-1.09453	4.01623	0.00126838	-0.879676	5.88729	0.000190106	-0.0266113	0.121365	0.891784	0.108197	0.971504	0.247576
1261	LHP1	P33399		1.04498	4.00398	0.00129864	1.475	4.58413	0.000541957	0.40307	0.930529	0.384907	0.4354	1.59073	0.10355
2613	BAT2	P47176		-1.36138	3.99335	0.00132471	-0.409037	2.24435	0.0152868	-0.362575	1.17271	0.296639	0.301455	1.87613	0.0727393
1829	DMA1	P38823		2.73792	3.98231	0.00135261	NaN	NaN	NaN	NaN	NaN	NaN	1.89487	1.18614	0.182892
227	PUT2	P07275	TRUE	-1.71011	3.97552	0.00136768	-1.36383	3.28962	0.00285817	0.123819	0.187625	0.832999	-0.798669	1.62768	0.0985833
2346	TES1	P41903	TRUE	-2.28311	3.95615	0.00142361	-2.80934	4.12102	0.000888676	-0.798424	1.85946	0.148571	-0.82116	2.49539	0.0348953
1269	SDH3	P33421	TRUE	-1.5177	3.95398	0.00142429	-0.659861	4.35014	0.000699903	-0.230968	0.562344	0.549267	-0.431481	1.82402	0.0773459
510	PHO81	P17442		-2.04118	3.95069	0.00142869	-3.6603	2.79953	0.00612937	-0.370699	0.617217	0.519677	-0.47656	0.459878	0.511237
452	KRS1	P15180		1.25092	3.93947	0.00145954	1.97365	4.24921	0.00076069	-0.21701	0.713436	0.47611	0.444847	1.43104	0.130276
731	DBP2	P24783		2.06383	3.93536	0.00146686	2.33676	4.97205	0.000361384	0.110076	0.119564	0.893114	0.272322	0.758721	0.329433
2931	YGR250C	P53316		-2.48882	3.92499	0.00148908	-2.56565	3.94174	0.00114367	0.183236	0.470586	0.613665	0.253888	0.505916	0.474317
958	MLS1	P30952		-1.40758	3.9256	0.00148908	-1.40585	4.3546	0.000695825	-0.204099	0.66691	0.500054	0.280844	0.830795	0.300651
3644	ECI1	Q05871		-2.28467	3.92285	0.00148984	-2.78737	1.35102	0.0757925	-0.923849	2.58832	0.0619671	-0.051125	0.0571768	0.922168
2907	YGR130C	P53278		-1.18278	3.91131	0.00152331	-1.32139	4.24954	0.00076069	-0.144894	0.512067	0.584866	-0.143066	0.441523	0.52399
281	RNR2	P09938		-0.99394	3.9077	0.00152932	-0.909406	2.91775	0.00510072	-0.341846	1.09849	0.320624	-0.24997	0.830403	0.300724
3695	DCS1	Q06151		-1.0872	3.90412	0.00153532	-0.570915	1.97662	0.0243026	0.0673342	0.114828	0.897334	0.301508	0.655056	0.383628
3596	RRP5	Q05022		1.75804	3.89668	0.00155511	1.07969	3.60997	0.0018009	0.0706673	0.143052	0.876732	-0.0492983	0.121318	0.839431
2967	SUN4	P53616	TRUE	1.34991	3.88712	0.00158289	-0.650905	0.603906	0.316218	NaN	NaN	NaN	NaN	NaN	NaN
2004	AIM1	P39724	TRUE	-2.00297	3.8851	0.0015835	0.0397658	0.0149875	0.972089	-0.126129	0.113019	0.898932	1.3406	0.701719	0.358075
1995	BDH1	P39714		-1.63574	3.87637	0.00158373	-2.51415	4.13841	0.000873447	0.548488	0.794153	0.442825	-1.19784	1.87753	0.0726351
420	GCY1	P14065		-1.16244	3.87886	0.00158373	-0.432603	2.23128	0.0156475	-0.380366	1.20057	0.287002	0.383012	1.33506	0.146299
164	PDC1	P06169		0.698042	3.87861	0.00158373	1.71801	5.19226	0.000277189	0.0398798	0.183112	0.835454	0.48642	1.58908	0.103735
338	RPP1B	P10622		1.13244	3.87922	0.00158373	1.45912	2.55452	0.00903008	0.87391	3.36308	0.0244457	0.625425	0.88907	0.278363
1059	ERG1	P32476		1.22447	3.87585	0.00158373	2.29015	5.31815	0.000251907	-0.567623	1.40176	0.236067	-0.196277	0.292166	0.659356
1197	DLD1	P32891	TRUE	-1.0045	3.86861	0.00160363	-0.646914	3.63818	0.00175612	-0.0213127	0.0769786	0.932268	-0.124572	0.639502	0.391663
1009	NDI1	P32340	TRUE	-1.47014	3.85488	0.00164829	-1.26201	4.51487	0.000565789	-0.0208855	0.0872283	0.92128	-0.279851	0.688811	0.365223
2930	SOL4	P53315		-2.36004	3.84596	0.00166181	-4.24507	2.34871	0.0126812	-0.346329	0.579535	0.540224	-1.1351	1.5092	0.116244
675	TRX2	P22803		-1.24217	3.84695	0.00166181	-0.33774	1.0177	0.142864	-0.476959	1.83048	0.152608	0.245173	0.707128	0.355494
478	HSP26	P15992		-0.823667	3.84748	0.00166181	-0.311362	0.608392	0.31409	-0.225833	1.08314	0.325615	-0.00055027	0.000423729	0.999349
4199	RDL1	Q12305		-1.12193	3.84247	0.00166837	-0.629606	2.85341	0.00558403	-0.091279	0.266076	0.767922	0.38838	2.08752	0.0545358
4283	NOP56	Q12460		1.63498	3.83617	0.00168589	1.54951	4.2799	0.000729991	0.342074	1.12568	0.310662	0.0325823	0.0804249	0.889912
1544	ATP3	P38077	TRUE	-1.17706	3.81847	0.00174183	-0.769492	3.7842	0.00142623	0.00370312	0.0164874	0.982653	-0.136629	0.636254	0.39316
1248	CBF5	P33322		0.554359	3.81953	0.00174183	0.608697	4.4193	0.00062438	-0.123862	0.309439	0.737742	-0.234825	0.647506	0.387303
2140		P40169		-4.16443	3.81488	0.00174924	-4.58463	2.6958	0.00718974	-0.855741	1.59497	0.188654	-2.77981	1.90307	0.0703121
443	APE1	P14904		-1.38899	3.80741	0.00177245	-0.68268	1.89532	0.0278292	0.307383	1.16261	0.299202	0.91925	3.13113	0.018759
1415	MCR1	P36060	TRUE	-1.37654	3.79706	0.00180082	-1.26056	3.70202	0.00159147	-0.236137	0.827733	0.430833	-0.629868	2.25918	0.0447157
109	ADE4	P04046		1.72418	3.79786	0.00180082	1.1817	3.44444	0.00225879	0.141443	0.297204	0.744471	-0.141754	0.297041	0.655215
2927	LSC2	P53312	TRUE	-1.22874	3.79379	0.00180724	-1.01612	3.97066	0.00109151	-0.130251	0.466598	0.617209	-0.105676	0.355874	0.599586
2076	ARB1	P40024		1.17962	3.78762	0.00182589	1.85828	3.64831	0.00173083	0.451731	1.15338	0.301067	0.583642	0.924292	0.264754
4033	YOR289W	Q12012		-2.75202	3.78573	0.00182666	-2.90573	3.02396	0.00435026	-0.685928	0.938886	0.384784	-0.825579	1.36996	0.139442
1812	RTC3	P38804		-1.13069	3.78062	0.00184106	-0.595141	0.742442	0.242767	0.153573	0.340989	0.711103	0.124815	0.156299	0.79658
253	SPE1	P08432		4.10618	3.77546	0.00185581	NaN	NaN	NaN	NaN	NaN	NaN	NaN	NaN	NaN
776	PET18	P25362		3.49177	3.77253	0.00186113	NaN	NaN	NaN	NaN	NaN	NaN	NaN	NaN	NaN
310	RPS24B;RPS24A	P0CX32;P0CX31		0.956142	3.77033	0.00186337	0.764874	2.88319	0.00537024	0.283673	1.5574	0.199302	-0.110035	0.186887	0.763627
622	SDH2	P21801	TRUE	-1.55167	3.76851	0.00186401	-1.81759	3.99466	0.00105988	-0.467586	1.28001	0.262811	-0.78587	2.9692	0.0214627
2955	TOM7	P53507	TRUE	-0.907224	3.76302	0.00186978	NaN	NaN	NaN	0.212858	0.244865	0.784608	2.76385	0.799862	0.313919
3959	PUS7	Q08647		1.77547	3.76053	0.00186978	2.38024	3.53842	0.00199722	-0.0211196	0.0292208	0.974911	-0.22279	0.17895	0.773792
796	RAD51	P25454		3.60627	3.76196	0.00186978	NaN	NaN	NaN	NaN	NaN	NaN	NaN	NaN	NaN
2763	YOR1	P53049	TRUE	5.25943	3.76519	0.00186978	2.41879	5.23579	0.000272024	4.50145	3.45894	0.0224866	2.40047	4.45243	0.00452656
396	CAF20	P12962		1.19116	3.75731	0.00187661	4.66111	2.16931	0.0172219	0.415582	0.908835	0.393559	3.57667	1.62016	0.0997742
1461	UTH1	P36135	TRUE	-2.5382	3.7518	0.00189071	-2.53271	4.82477	0.000419405	-0.21424	1.67915	0.174141	-1.70941	3.38042	0.0162317
3748	ATG33	Q06485	TRUE	-2.41586	3.75047	0.00189071	-0.957421	0.577202	0.332591	-0.450726	0.866169	0.410086	0.199565	0.177006	0.775128
1629		P38235		-1.86278	3.74917	0.00189071	-0.716092	1.20467	0.100268	-0.456141	1.02985	0.347627	0.50783	0.886764	0.278825
900	IDH2	P28241	TRUE	-1.32634	3.74118	0.00191447	-1.04315	3.03966	0.00422819	-0.134987	0.362309	0.692464	-0.56852	2.86552	0.0243624
963	CYS3	P31373		1.40752	3.7402	0.00191447	1.77335	4.4141	0.000628998	-0.0589924	0.400434	0.669283	0.395474	1.94089	0.0669783
2821	YGL101W	P53144		2.36548	3.73891	0.00191447	NaN	NaN	NaN	0.522776	0.804717	0.440198	2.75223	2.54974	0.0333232
4236	NCA2	Q12374	TRUE	-3.69655	3.72583	0.00195856	-2.55394	2.67318	0.00743243	-1.09989	1.13421	0.308662	-0.841741	1.91841	0.0689306
550	KGD2	P19262	TRUE	-1.12701	3.72694	0.00195856	-0.892499	3.13099	0.00367542	0.242109	0.981665	0.366502	-0.23912	0.792743	0.317002
1897	PMC1	P38929		-3.61865	3.71626	0.00198624	-2.62895	3.7425	0.0015069	-0.981353	4.36099	0.00627546	-1.02662	1.65572	0.0954974
2872	NQM1	P53228		-1.61058	3.71499	0.00198624	-1.2168	1.91685	0.0269497	-0.399268	1.13048	0.310149	-0.171981	0.313893	0.639252
816	KRR1	P25586		2.17222	3.71619	0.00198624	0.689153	1.87857	0.0286419	-0.411839	0.366258	0.691788	-0.594037	1.71703	0.088669
679	HSP12	P22943		-1.45418	3.71277	0.00198922	-0.275635	0.419703	0.452722	-0.0307541	0.0826312	0.927048	0.670829	0.96103	0.251161
2789	MDS3	P53094		-3.32273	3.70738	0.0020068	-3.71771	4.4408	0.000611115	-1.37995	1.56741	0.196862	-0.805712	0.684934	0.367221
3289	YPL113C	Q02961		-3.27364	3.70501	0.00201053	-1.01822	0.592343	0.323076	-1.11439	1.05942	0.335439	0.778283	0.483744	0.490681
116	RPL25	P04456		1.03574	3.69442	0.00204567	1.26859	3.69936	0.00159408	0.343574	2.20071	0.101365	0.890057	2.73229	0.0278205
1205	SKG6	P32900		2.65523	3.69439	0.00204567	0.464922	0.530345	0.363676	NaN	NaN	NaN	-0.0553184	0.0231055	0.967674
693	GSY1	P23337		-2.83009	3.68345	0.00209041	-3.26744	3.61819	0.00179055	-1.05721	2.86093	0.0437341	-0.38366	0.528101	0.460241
3070	ESBP6	P53918	TRUE	-2.43288	3.68008	0.00209924	-2.49073	3.06473	0.00406005	0.0641918	0.0928567	0.914853	-0.957006	1.15301	0.19242
4285	PEX11	Q12462		-1.89694	3.67185	0.00213187	-1.53258	2.61867	0.00813803	-0.931084	3.827	0.0124244	0.625738	0.952673	0.25471
2700	GLO1	P50107		-1.96742	3.66244	0.00213348	-1.64791	3.66406	0.00169113	-0.564731	1.72833	0.167372	-0.713459	1.89193	0.0712566
828	SYP1	P25623		-1.04733	3.66758	0.00213348	-0.891876	3.0752	0.00401109	-0.370978	1.48043	0.218771	-0.0349293	0.0831918	0.886418
3708	FPR4	Q06205		0.70256	3.66582	0.00213348	-0.081306	0.259909	0.616933	-0.2118	0.996484	0.361893	-0.376161	1.38583	0.137445
2026	TIF4631	P39935		1.13544	3.66311	0.00213348	1.33347	4.93455	0.000385062	0.41787	1.40422	0.236067	0.382931	2.75956	0.0273958
2651	PUS4	P48567	TRUE	1.20938	3.66306	0.00213348	-0.309995	0.0971004	0.834355	0.689069	0.304884	0.738674	0.0125179	0.00357648	0.995355
532	FUR1	P18562		1.47311	3.66281	0.00213348	3.06526	4.62201	0.000527679	0.0826025	0.171622	0.847693	0.544537	0.603382	0.410501
1477	MSA2	P36157		4.03094	3.66083	0.00213408	0.733286	0.32617	0.5437	NaN	NaN	NaN	NaN	NaN	NaN
2653	LYS20	P48570		2.43888	3.65366	0.00216214	1.82045	3.68695	0.0016186	-0.467283	0.730465	0.4678	-0.677646	1.42584	0.130949
2085	PCL6	P40038		2.22755	3.65183	0.00216387	1.00879	3.15891	0.00350028	-0.304714	0.552662	0.556023	-1.47692	2.36114	0.0400152
297	YGL041W-A	P0C5N3	TRUE	-2.55282	3.643	0.00219337	-1.86911	1.35661	0.0749665	-0.333987	0.917506	0.391107	0.275972	0.271001	0.679734
1512	SHM2	P37291		1.61054	3.64404	0.00219337	1.1756	4.46246	0.000601248	0.17835	0.348566	0.70421	0.792877	3.09759	0.0196747
3304		Q03102		-2.12952	3.63156	0.00221181	-1.38904	3.80754	0.00137075	-0.255332	0.793432	0.442825	0.11755	0.342543	0.612266
2598	RSM7	P47150	TRUE	-2.05185	3.63608	0.00221181	-1.83898	1.53887	0.0535844	-0.964922	2.41523	0.0786145	-0.718589	0.470718	0.50124
2712	RIB4	P50861	TRUE	-1.687	3.62866	0.00221181	-0.96056	2.21158	0.0161798	-0.664706	2.18231	0.102122	-0.424303	0.509226	0.473286
680	AIM17	P23180	TRUE	-1.61358	3.62896	0.00221181	-1.613	5.90938	0.000190106	0.158419	0.311006	0.736876	-0.616125	1.76227	0.0832993
2218	AYR1	P40471	TRUE	-1.58797	3.6328	0.00221181	-2.34686	4.64051	0.000518631	-0.501096	1.21674	0.28302	-1.30976	3.49003	0.0142325
68	ATP2	P00830	TRUE	-0.815871	3.62774	0.00221181	-0.69077	4.13431	0.000873447	0.289059	1.83183	0.152608	-0.128593	0.90591	0.271966
2922	ZPR1	P53303		1.11247	3.63743	0.00221181	1.99461	5.03893	0.000341754	0.393573	2.07212	0.114714	0.801281	1.09453	0.20919
1974	ACO2	P39533	TRUE	3.77072	3.6286	0.00221181	2.2065	2.51513	0.0096503	-0.692603	0.474017	0.610233	-1.24711	1.55313	0.109427
656	TRX1	P22217	TRUE	-1.27826	3.62519	0.00221751	-0.427859	1.51962	0.0555203	-0.0315475	0.103208	0.903608	0.0859203	0.190632	0.760591
4119	YRA1	Q12159		0.815185	3.61879	0.00224303	1.347	4.33524	0.000707822	0.172944	0.637586	0.509721	0.659691	2.45098	0.0361197
230	BCY1	P07278		-1.04622	3.60032	0.00233284	-0.800449	4.7093	0.000485925	-0.158747	0.761934	0.454038	-0.134348	0.81759	0.306179
2459	RPA43	P46669		1.93743	3.59729	0.00234155	2.50619	3.95521	0.0011238	0.447871	0.850615	0.417109	1.29661	1.92702	0.0679561
3557	ERB1	Q04660		1.36653	3.59289	0.00235771	0.498277	2.28475	0.0142182	0.438681	1.37151	0.239652	-0.350097	1.20865	0.177651
3727	GGA1	Q06336		-1.59315	3.58268	0.00239824	-1.29281	3.59001	0.00185878	-0.332277	0.888333	0.401788	-0.997107	2.78065	0.0272846
739	TSR4	P25040		1.4289	3.58334	0.00239824	2.26532	3.50744	0.00205583	0.19282	0.424684	0.648133	1.57443	3.52448	0.0135337
1708	TPS3	P38426		-1.02128	3.57079	0.00245687	-1.07272	2.88878	0.00530767	-0.225345	1.11301	0.31613	-0.0387216	0.11674	0.844066
2199	PFK26	P40433		-3.65507	3.56174	0.00249254	-1.92245	4.01108	0.00103844	-0.569757	1.31759	0.250114	-0.662294	2.21858	0.0461879
328	TIF1	P10081		0.367637	3.56209	0.00249254	0.524819	5.26878	0.000266131	-0.0113525	0.0927049	0.914853	-0.0502481	0.553697	0.443975
1927	LYS9	P38999		2.0655	3.55882	0.00250138	3.64098	3.40541	0.00239371	-0.732069	1.76298	0.162342	-0.274629	0.320239	0.633229
2077	MXR1	P40029		-5.10432	3.55727	0.00250235	-1.58588	2.70443	0.00710679	-0.715531	0.301052	0.741839	0.403262	0.458722	0.511726
3848	YDL121C	Q07541		-2.30477	3.54692	0.00255458	-0.326705	0.308074	0.562461	-1.43573	1.93405	0.136446	-0.957775	3.3524	0.0163562
1609	NCL1	P38205		1.48901	3.54195	0.00257587	2.38473	4.79788	0.0004359	-0.150992	0.270267	0.767179	1.09483	2.97934	0.021384
233	SES1	P07284		0.415664	3.53735	0.00259507	0.484781	1.807	0.032526	0.0659599	0.332632	0.717969	0.14372	0.446656	0.520965
1064	GCD11	P32481		0.436254	3.53063	0.00262728	0.719524	5.02447	0.000341754	-0.183889	0.773102	0.449926	-0.0385723	0.101048	0.862439
2190	MPM1	P40364	TRUE	-1.98781	3.52192	0.00263425	-1.18494	2.5952	0.00846118	-0.259157	1.43407	0.230133	-0.424534	1.44217	0.127855
511	MDH1	P17505	TRUE	-1.08018	3.52499	0.00263425	-0.519631	2.71406	0.00701519	0.0075779	0.023062	0.978546	0.269266	1.42385	0.130956
85	YPT1	P01123		-0.790211	3.52118	0.00263425	-0.11907	0.411639	0.460283	-0.397058	2.10231	0.109616	-0.0687828	0.0915544	0.875488
4156	SLP1	Q12232		2.47937	3.52095	0.00263425	-0.226423	0.110509	0.813282	NaN	NaN	NaN	NaN	NaN	NaN
612	RNR1	P21524		2.64379	3.52006	0.00263425	4.16355	4.62935	0.000522083	0.21273	0.236813	0.790357	2.27532	3.3526	0.0163562
2099	DOT6	P40059		3.59175	3.52669	0.00263425	NaN	NaN	NaN	NaN	NaN	NaN	NaN	NaN	NaN
4258	ATG31	Q12421		5.41179	3.52473	0.00263425	NaN	NaN	NaN	NaN	NaN	NaN	NaN	NaN	NaN
140	ATP4	P05626	TRUE	-1.31062	3.51406	0.00266268	-1.17725	5.5791	0.000190106	-0.222589	0.575931	0.540441	-0.547559	3.82722	0.00999141
2001	AIM2	P39721		-1.30889	3.50974	0.0026811	-0.978924	1.58673	0.0491974	-0.327548	0.763999	0.453351	-0.0451393	0.0444965	0.93674
2253	ARC15	P40518	TRUE	-0.88956	3.48817	0.00280911	-0.00690842	0.011578	0.977046	0.126462	0.46095	0.621038	0.198811	0.348888	0.605296
4349	YLR363W-A	Q3E747		3.19174	3.48653	0.00281118	NaN	NaN	NaN	NaN	NaN	NaN	NaN	NaN	NaN
3182	ACC1	Q00955		-0.694542	3.48482	0.00281373	-0.338883	4.93333	0.000385062	-0.0586214	0.781693	0.444694	-0.00234413	0.0154501	0.978074
1471	GPT2	P36148		-2.4893	3.47894	0.00283492	-1.5568	4.88041	0.000406968	-0.876147	2.86104	0.0437341	-0.885693	2.84751	0.0248536
1111	SSE1	P32589		0.606584	3.47959	0.00283492	1.2314	4.74007	0.000465716	0.0815916	0.455765	0.624958	0.284075	1.08299	0.211425
43	QCR6	P00127	TRUE	-1.05739	3.47645	0.0028373	-1.18705	4.20958	0.000789925	0.150668	0.483041	0.60557	-0.663724	1.26924	0.162297
3829	TSR1	Q07381		0.925906	3.47536	0.0028373	-0.0175672	0.0144163	0.972774	-0.890705	1.46429	0.221658	-0.2245	0.39682	0.561775
2726	HFM1	P51979		3.7249	3.47469	0.0028373	NaN	NaN	NaN	3.20551	2.92646	0.0436616	2.15149	1.69363	0.0914099
1541	SCO2	P38072	TRUE	-3.05918	3.46872	0.00285949	-1.70465	1.80781	0.032499	-0.380752	1.16242	0.299202	-0.443192	0.735244	0.341602
2045	DLD3	P39976		1.49282	3.46896	0.00285949	1.27349	1.55257	0.052192	-0.790316	2.16496	0.103248	1.10301	3.024	0.0211118
3116	ALD3	P54114		-0.925148	3.4571	0.00292837	-0.776765	2.19477	0.0165979	0.544704	2.62872	0.0573317	0.720815	1.13328	0.197532
3581	HSP32;SNO4	Q08992;Q04902		-3.9126	3.45144	0.00294078	-1.98494	2.30767	0.0136492	-1.05192	2.57892	0.0623788	NaN	NaN	NaN
422	RPL3	P14126		0.54317	3.45261	0.00294078	0.963039	5.10666	0.00030252	-0.052742	0.526547	0.576453	0.18918	1.33821	0.145884
2002	GEM1	P39722	TRUE	2.69383	3.45184	0.00294078	-3.64634	1.55299	0.052192	0.894493	0.253006	0.778508	-0.491245	0.236253	0.712013
4250	LPX1	Q12405		-2.02205	3.4497	0.00294401	-1.88292	1.55321	0.052192	-0.301	0.529445	0.576095	-0.45774	0.371532	0.585337
384	MRP7	P12687	TRUE	-2.18514	3.44757	0.00294988	-2.30378	2.00655	0.0230112	-1.16695	1.41119	0.236067	-1.97503	2.23653	0.0459541
94	TUF1	P02992	TRUE	-1.10042	3.44428	0.00296364	-0.98483	3.2578	0.00299575	0.104802	0.427009	0.647435	-0.350648	1.4866	0.119262
2715	PSP1	P50896		-1.31832	3.4397	0.00298643	-2.39248	2.75628	0.00654851	0.433364	1.12913	0.310151	-0.961329	0.936998	0.260783
3937	ETT1	Q08421		2.08908	3.43589	0.00300406	1.08976	1.9004	0.0275733	0.54429	0.786863	0.443477	-0.444531	0.873778	0.283573
957	ATP7	P30902	TRUE	-1.03573	3.43454	0.00300477	-1.00667	3.15993	0.00349706	-0.330379	2.18768	0.101365	-0.55691	2.19489	0.0471378
3533	HFD1	Q04458	TRUE	-1.79589	3.42408	0.00306922	-1.43472	4.17132	0.000824121	-0.0508184	0.11505	0.897334	-0.39239	2.38269	0.0391291
3908	NOP12	Q08208		1.35894	3.41422	0.00313068	1.03288	3.06241	0.00407638	-0.0328827	0.060895	0.946503	-0.0806799	0.176961	0.775128
3920	SDH5	Q08230	TRUE	-1.75474	3.41147	0.00314162	-3.49043	3.17371	0.00342232	-0.421218	0.829566	0.429804	-1.04211	1.486	0.119283
1246	TKL2	P33315		-1.64322	3.40902	0.00314531	0.485696	2.02138	0.0225204	-0.789452	3.16948	0.0325112	-0.58439	1.90617	0.070143
3176	TPS1	Q00764		-0.745563	3.40849	0.00314531	-0.803391	3.97502	0.00108921	0.217966	0.466046	0.61729	-0.160956	0.494837	0.482285
152	RPS13	P05756		0.693041	3.40689	0.00314798	1.26039	2.46051	0.0106228	0.0088253	0.0211379	0.980208	0.357251	0.551722	0.445539
311	RPS30B;RPS30A	P0CX34;P0CX33		1.05279	3.40295	0.00316778	1.68208	5.29467	0.000257893	0.0096674	0.0242894	0.978546	0.966048	2.75048	0.027626
4144	WTM2	Q12206		-2.72151	3.40028	0.00317831	0.293395	0.254819	0.622439	-1.7914	1.45934	0.223236	NaN	NaN	NaN
1581	CTP1	P38152	TRUE	3.53517	3.39704	0.00319318	2.81425	2.28696	0.0141696	NaN	NaN	NaN	NaN	NaN	NaN
3180	CYT2	Q00873	TRUE	-1.78729	3.39227	0.00321045	-1.88718	1.91433	0.0270361	-0.708586	1.18479	0.291752	-0.117504	0.186751	0.763627
1742	HXT5	P38695		-1.61918	3.39253	0.00321045	-1.25415	1.57595	0.050006	-0.652527	2.45389	0.0739692	-1.10826	1.24287	0.168734
804	MXR2	P25566	TRUE	-2.5433	3.38639	0.00324519	-1.67752	1.41458	0.0677062	-0.903334	0.868885	0.408333	-0.911285	0.724408	0.34653
2244	CAB2	P40506		-2.16679	3.37851	0.0032669	-0.248705	0.181793	0.713347	-1.56991	2.63159	0.0573317	-0.518534	0.983225	0.243733
488	OM45	P16547	TRUE	-1.52005	3.37758	0.0032669	-0.936432	4.48212	0.000595137	-0.2101	0.879576	0.404933	-0.0700054	0.422536	0.541247
2485	GCD14	P46959		1.39719	3.3792	0.0032669	1.36856	2.14607	0.0179782	0.505724	0.701185	0.481889	0.373215	0.316477	0.636821
503	RPL8A	P17076		2.25245	3.3775	0.0032669	2.63328	4.21215	0.000789925	1.35187	2.19026	0.101365	1.27948	0.868055	0.285491
4234	MMP1	Q12372		4.27256	3.37843	0.0032669	-0.829697	0.165799	0.731372	5.72706	4.00991	0.00938933	NaN	NaN	NaN
2317	RPS29A	P41057		0.878127	3.37476	0.00327863	1.72953	3.74862	0.00150409	0.0526619	0.212982	0.81059	0.651275	1.76738	0.0828456
1229	RPT5	P33297		-0.968905	3.36537	0.00334117	-0.284774	0.269069	0.60616	-0.475592	2.32948	0.0868123	0.227291	0.176496	0.775128
4025	TMA46	Q12000		1.59901	3.35857	0.00338467	0.875791	0.895983	0.180536	0.142004	0.183866	0.83501	0.0734081	0.048379	0.932754
639	CHC1	P22137		-0.806101	3.35688	0.0033886	-0.505318	2.81483	0.0059522	-0.0541048	0.285199	0.756009	-0.122124	0.410583	0.551277
1906	RRP8	P38961		2.25256	3.35133	0.00341372	2.98303	3.01996	0.004359	0.390922	0.458404	0.622926	0.638538	0.490451	0.485281
484	PDC5	P16467		2.40965	3.35235	0.00341372	NaN	NaN	NaN	NaN	NaN	NaN	NaN	NaN	NaN
4104	SAS10	Q12136		1.81115	3.34905	0.00342241	1.82554	4.34439	0.00070556	0.561372	1.20786	0.285086	0.783097	1.42861	0.130559
3856	FMP45	Q07651		-2.93541	3.34326	0.00343178	-2.018	1.37263	0.0730567	0.217073	0.713845	0.476032	NaN	NaN	NaN
1682	OM14	P38325	TRUE	-1.70341	3.3398	0.00343178	-2.54848	3.78133	0.00142881	-0.267509	0.263799	0.768898	-2.21184	6.23609	0.00163245
976	TPS2	P31688		-1.14914	3.33977	0.00343178	-0.948788	2.58782	0.00855015	-0.0973206	0.247741	0.782155	0.443417	1.39699	0.135341
1798	SSZ1	P38788		0.669894	3.34094	0.00343178	1.22744	4.70591	0.000485968	0.197203	1.395	0.236409	0.404048	1.01741	0.232345
1055	EFB1	P32471		0.829419	3.34511	0.00343178	1.4052	3.52074	0.00202389	0.242311	1.35942	0.240539	0.484761	1.47228	0.121527
2145	CCS1	P40202	TRUE	1.12491	3.3414	0.00343178	1.16828	1.39969	0.0694153	-0.47896	1.09886	0.320624	-0.126139	0.158022	0.7949
2195	CCT5	P40413		1.18955	3.34642	0.00343178	1.19977	3.49451	0.00207959	0.0962009	0.383383	0.681361	0.227891	0.723272	0.347123
2804	YGL140C	P53120		2.66465	3.33439	0.00346546	-1.37656	1.45863	0.0623161	1.70791	2.0562	0.116381	-1.87365	2.03169	0.0592999
1465	FMP46	P36141	TRUE	-2.21619	3.3314	0.00348021	-1.5568	2.90984	0.00516991	-0.457246	1.47036	0.220023	-0.216066	0.420099	0.543585
2545	BBC1	P47068		-0.829433	3.32724	0.00350448	-0.188889	1.26307	0.0894286	0.174232	0.64198	0.509676	0.313123	1.20406	0.179035
2551	CCT8	P47079		0.593874	3.32496	0.00351374	0.356457	1.9016	0.0275614	0.258955	1.13753	0.307238	-0.226931	0.827128	0.301898
1445	MIC60	P36112	TRUE	-1.14025	3.31931	0.00354149	-0.980133	4.21943	0.000786766	-0.0359335	0.0609726	0.946503	-0.234381	2.07955	0.0550958
1070	MKK2	P32491		3.74356	3.31928	0.00354149	NaN	NaN	NaN	4.29918	4.42068	0.00595027	NaN	NaN	NaN
552	SAM2	P19358		0.646911	3.3144	0.00357226	1.63433	4.69689	0.000485968	-0.184123	0.619096	0.519084	0.315811	1.38508	0.137445
1815	YHR097C	P38809		-1.86611	3.30735	0.00361202	-1.41635	3.90849	0.00121007	-0.216559	0.36085	0.692669	-0.0551891	0.188872	0.761903
4280	SPE4	Q12455		2.25321	3.30759	0.00361202	NaN	NaN	NaN	NaN	NaN	NaN	NaN	NaN	NaN
321	RPL12B;RPL12A	P0CX54;P0CX53		0.887604	3.30371	0.00363302	0.952836	4.57625	0.000542504	0.243775	0.984305	0.366116	0.259144	1.43309	0.129959
1310	PRX1	P34227	TRUE	-0.980291	3.30139	0.00364315	-0.702202	3.97231	0.00109151	0.218513	0.769208	0.451454	0.268977	1.34581	0.144058
965	SYN8	P31377		2.10395	3.29967	0.00364826	0.272608	0.276782	0.597329	NaN	NaN	NaN	NaN	NaN	NaN
4065	NUS1	Q12063		-2.13723	3.29801	0.00365062	-0.184431	0.183791	0.71052	-1.64861	2.35266	0.0842719	0.331672	0.650208	0.385543
1969		P39523		-2.07022	3.29717	0.00365062	-0.796052	1.08135	0.126511	-0.686151	1.14474	0.30547	-0.297084	0.431715	0.532253
1582	APM3	P38153		-3.37949	3.29136	0.00369037	-0.797106	0.900112	0.179267	-1.54302	1.60805	0.184724	0.0704937	0.0562632	0.922657
313	RPS6B;RPS6A	P0CX38;P0CX37		0.551845	3.28025	0.00377647	0.865416	2.90505	0.00521493	-0.107263	0.467245	0.616641	0.410999	1.69401	0.0914099
647	SSA4	P22202		-1.15137	3.27884	0.00377779	-0.0182695	0.020976	0.960951	0.199439	0.307697	0.737819	0.675872	0.886902	0.278825
1917	GGC1	P38988	TRUE	-0.951073	3.2779	0.00377779	-0.703238	2.79573	0.00615186	-0.100739	0.297829	0.744471	-0.336305	0.519177	0.465931
2426	MIC19	P43594	TRUE	-1.10172	3.27297	0.0038113	-0.786152	2.71484	0.00701493	0.732541	2.78872	0.0469227	0.0731759	0.0943571	0.871823
360	SSB1	P11484		0.77521	3.26694	0.00385497	1.25911	3.99974	0.00105526	0.124474	0.531409	0.574513	0.329337	0.981404	0.243984
107	COX4	P04037	TRUE	-1.57235	3.26049	0.00390234	-1.02812	3.45871	0.00220564	-0.216943	0.849567	0.417727	0.0340433	0.109277	0.851369
1761	GND1	P38720		0.49593	3.25946	0.00390234	1.29253	5.35719	0.000248041	-0.0595379	0.737709	0.46578	0.962242	4.00543	0.00831687
453	CTA1	P15202	TRUE	-1.56341	3.2525	0.00394575	-0.856686	2.5815	0.00863548	-0.562723	1.41156	0.236067	-0.41542	1.79099	0.080708
1767	NPR3	P38742		3.27846	3.2525	0.00394575	NaN	NaN	NaN	NaN	NaN	NaN	NaN	NaN	NaN
849	CPR3	P25719	TRUE	-1.29577	3.25112	0.00394847	-0.107953	0.155749	0.745129	0.155717	0.24977	0.780748	0.496533	0.886974	0.278825
4350	RPS21B	Q3E754		7.00476	3.24895	0.00395842	NaN	NaN	NaN	5.9302	2.77291	0.0469227	4.37122	1.38391	0.137509
2776	VID30	P53076		-2.43193	3.24306	0.00400262	-1.71229	3.41014	0.00238171	0.105611	0.21961	0.807392	-0.514011	1.50717	0.116511
1504	PIM1	P36775	TRUE	-1.39985	3.24058	0.00401566	-1.96907	5.70319	0.000190106	-0.470551	1.54563	0.199866	-1.05809	2.98874	0.0213017
3039	MRPL19	P53875	TRUE	-1.46576	3.23468	0.00406062	-0.763299	1.28572	0.0857539	-0.269969	0.510489	0.586259	-0.530738	0.755194	0.331306
2786	ARO8	P53090		0.684739	3.22831	0.00411055	1.66125	4.46547	0.000601248	0.0422392	0.160341	0.859029	1.28534	3.15244	0.0185481
2655	RPS12	P48589		0.681229	3.22393	0.00414209	0.938749	4.57348	0.000542855	0.0771828	0.18724	0.832999	-0.0163984	0.0585312	0.920821
2080	TPA1	P40032		1.7713	3.22172	0.00415306	2.05581	3.2089	0.00323919	-0.0447946	0.0986182	0.908323	-0.485137	0.51096	0.471869
3480	HPT1	Q04178		1.84716	3.21278	0.00422918	2.31751	3.8074	0.00137075	0.318409	0.818197	0.434681	0.277256	0.170127	0.782644
3786	OMS1	Q06668	TRUE	-4.18198	3.21077	0.00422959	-3.85134	3.56062	0.00194425	-1.32902	1.2509	0.273684	-1.80445	5.64297	0.00191688
3287	MRP51	Q02950	TRUE	-1.80996	3.20928	0.00422959	-1.95688	4.31174	0.000709178	-0.956503	1.85422	0.148805	-1.08585	2.42077	0.0369808
2300	REE1	P40893		-1.60546	3.2074	0.00422959	-0.573478	0.927707	0.170001	-0.341177	1.30938	0.252818	0.29028	0.6924	0.362848
2913	MRPS35	P53292	TRUE	-1.40103	3.20663	0.00422959	-1.89553	3.33551	0.00265466	-0.390327	1.03282	0.347627	-0.688981	1.02924	0.228778
220	LEU1	P07264		0.675997	3.20739	0.00422959	0.882951	1.97092	0.0244972	0.363808	1.7893	0.158842	0.471394	1.16828	0.187772
3417	TRM82	Q03774		1.07629	3.20646	0.00422959	2.29027	4.27965	0.000729991	-0.15743	0.216658	0.808371	0.795138	1.09406	0.20919
1103	SPS19	P32573		-2.1521	3.20211	0.00423693	-1.26706	2.27781	0.0143918	-0.736371	1.61989	0.184169	-0.0407553	0.0719848	0.902978
2228	YIL108W	P40483		-1.67776	3.20267	0.00423693	-1.7914	4.5671	0.000545002	-0.584983	1.07034	0.331035	-0.27455	0.923178	0.264754
2635	GYP7	P48365		-1.04003	3.20352	0.00423693	-0.927483	2.36934	0.0122094	-0.289279	0.961514	0.374458	0.42272	0.920718	0.265492
1378	OCT1	P35999	TRUE	2.34822	3.20157	0.00423693	0.432856	0.0986641	0.831845	0.473044	0.139329	0.880219	1.91779	0.785851	0.320094
2667	RPL38	P49167		0.92778	3.19762	0.00426551	1.57736	2.17203	0.0171867	-0.403763	1.2625	0.26794	-0.136666	0.122873	0.838161
631	KRE5	P22023		-2.72316	3.19046	0.00432622	-2.20614	1.33089	0.0785101	-0.949218	1.35215	0.240539	-1.85735	0.892607	0.277605
2312	GSC2	P40989		-2.47135	3.18461	0.0043745	-0.710997	1.12708	0.115869	-0.460333	1.1532	0.301067	0.305456	0.557745	0.441451
1725	URA8	P38627		-1.33913	3.18041	0.00440665	-0.693234	0.914735	0.174449	-0.166128	0.282102	0.756331	0.305447	0.484919	0.489685
2586	JSN1	P47135	TRUE	-1.78311	3.17012	0.00450172	-1.90366	3.97035	0.00109151	-0.85024	2.21952	0.0994052	-1.16681	1.94476	0.0666028
3217	OSH6	Q02201		-1.97739	3.16544	0.00453733	-2.00166	3.85709	0.00131157	-1.32272	2.34651	0.0846763	-0.964471	3.07443	0.0204254
1945	CCT3	P39077		0.876417	3.16467	0.00453733	0.743038	3.3912	0.00244052	0.134696	0.448517	0.630505	-0.061111	0.237617	0.711112
144	RPL6B	P05739		1.26521	3.15807	0.00459616	1.12613	2.53332	0.00934535	0.481586	1.2494	0.273712	0.147678	0.267509	0.682484
824		P25617		1.96163	3.15686	0.00459825	0.871426	0.784055	0.223792	0.0938292	0.0874383	0.92128	0.290795	0.201738	0.748822
1224	MRT4	P33201		1.76007	3.1547	0.00461042	1.29345	2.9572	0.00480016	-0.124214	0.311919	0.736424	-0.134056	0.19008	0.761004
3669	ECM19	Q06011	TRUE	-1.8292	3.15336	0.00461404	-0.744878	1.39417	0.0702013	-0.948472	0.645238	0.508853	-0.164825	0.253644	0.69711
2262	CST6	P40535		-1.61255	3.15105	0.00462796	-0.797779	0.915823	0.174083	-0.491085	0.62102	0.518463	0.102525	0.393111	0.565307
3971	RDL2	Q08742	TRUE	-1.59426	3.14687	0.00466198	-0.785976	2.21565	0.0160763	-0.22657	0.404986	0.666029	-0.167605	0.55859	0.440821
133	RPP0	P05317		0.598818	3.14483	0.00467321	0.732496	3.69238	0.00160551	-0.00343513	0.0156085	0.983626	0.0814638	0.387507	0.570318
2542	SNX4	P47057		-0.988352	3.1423	0.00468974	-1.85574	2.45094	0.0107482	-0.139044	0.620253	0.518463	-0.264078	0.446205	0.521068
2173	VPS27	P40343		-1.35623	3.13809	0.00472459	NaN	NaN	NaN	-0.49681	0.803682	0.440858	2.6668	1.95971	0.0652683
820	ILV6	P25605	TRUE	-0.893217	3.13287	0.00477089	-0.92945	3.66897	0.0016758	-0.177803	0.832541	0.427653	-0.887333	2.60262	0.0307665
978	ACB1	P31787		-2.12659	3.12988	0.00478638	-0.0586238	0.0931398	0.840275	-0.135013	0.39487	0.673625	0.605693	1.43865	0.128747
4049	SLF1	Q12034		-1.53662	3.12948	0.00478638	-0.63404	1.01398	0.143915	-0.0201044	0.0183812	0.981955	-0.433998	0.477494	0.495867
55	CCP1	P00431	TRUE	-1.57897	3.12684	0.00479383	-0.676102	4.1722	0.000824121	-0.444289	1.4371	0.228985	-0.232794	0.942551	0.258797
2062	FMP52	P40008	TRUE	-0.891557	3.12733	0.00479383	-1.17737	2.81684	0.00593496	-0.2554	1.66302	0.175772	-0.333339	0.733579	0.34242
1112	SSE2	P32590		-1.42515	3.12133	0.00484419	0.0540419	0.166719	0.730704	-0.266922	0.984164	0.366116	0.45129	1.39753	0.135334
1547		P38081	TRUE	-1.65402	3.11381	0.00488686	-1.6315	3.80782	0.00137075	-0.0527248	0.0799991	0.930052	-0.585396	1.7899	0.080708
3046	MDG1	P53885		-1.26639	3.11341	0.00488686	-1.15338	0.92118	0.172088	-0.392847	0.901548	0.395681	1.26724	2.4309	0.0368703
1404	MIA40	P36046	TRUE	-1.16553	3.11321	0.00488686	-1.0206	4.55954	0.000545002	0.281173	0.786759	0.443477	-0.280495	0.792289	0.317002
73	ENO2	P00925	TRUE	0.786702	3.11405	0.00488686	3.23014	3.75014	0.00150239	0.131553	0.570428	0.544998	0.776403	0.815274	0.307204
2231	SHQ1	P40486		1.37053	3.11265	0.00488686	0.726139	0.44559	0.430557	1.70843	1.68209	0.173455	4.42594	3.16887	0.0185481
3429	MRPS8	Q03799	TRUE	-1.39806	3.10928	0.00490406	-0.989332	1.6391	0.0446575	-0.125008	0.0707728	0.937782	-0.505949	0.711817	0.353131
1757	GRE3	P38715		-0.902659	3.10824	0.00490406	-0.703496	1.88605	0.0282733	-0.0666208	0.217143	0.808371	0.263462	0.883572	0.27942
60	CDC19	P00549		0.434589	3.10861	0.00490406	1.60369	3.54314	0.00199722	-0.0149279	0.105843	0.901476	0.105615	0.145702	0.809354
4053	YOR283W	Q12040		1.57988	3.10719	0.00490498	0.107561	0.325915	0.543842	0.280991	0.451683	0.628032	-0.989894	1.0864	0.210823
766	YCP4	P25349		-1.09217	3.10524	0.00491629	-0.656788	2.94637	0.00489734	-0.138785	0.384119	0.680962	0.0268383	0.142589	0.813682
847	FUB1	P25659		-1.96862	3.10309	0.00492981	NaN	NaN	NaN	NaN	NaN	NaN	NaN	NaN	NaN
1570	PCS60	P38137		-0.860393	3.10009	0.00493145	-0.768483	2.20451	0.0163845	0.086237	0.392238	0.674764	-0.373281	1.44711	0.126847
95	TEF1	P02994	TRUE	0.776483	3.10078	0.00493145	0.795271	4.31792	0.000709178	0.385928	1.92506	0.136446	0.375029	2.48822	0.0351034
3323	HOT1	Q03213		2.25453	3.1013	0.00493145	NaN	NaN	NaN	NaN	NaN	NaN	NaN	NaN	NaN
1790	FSH1	P38777	TRUE	1.35628	3.09781	0.00494659	1.45943	3.8875	0.00125615	0.275805	0.617596	0.519677	0.0830345	0.113567	0.848128
316	RPL1B;RPL1A	P0CX44;P0CX43		0.546339	3.09508	0.00496694	0.758467	4.02601	0.0010155	-0.00782871	0.0249293	0.978546	0.0474997	0.146626	0.808355
441	CPR1	P14832	TRUE	-0.880487	3.07717	0.00516492	-0.11856	0.442711	0.43269	0.233884	1.54518	0.199866	0.457021	1.93866	0.0669783
1022	SMY1	P32364		-1.63198	3.06501	0.00530003	-1.2654	1.92655	0.0265174	-0.257678	0.505321	0.589075	-1.04798	1.35331	0.142621
1090	RPA12	P32529		2.20719	3.06401	0.0053008	1.50301	3.24551	0.00304456	0.544341	0.76786	0.451454	0.245667	0.513919	0.470536
2314	NOP2	P40991		0.820818	3.054	0.00541264	0.741355	2.56195	0.00891749	-0.181376	0.574791	0.540612	-0.0399017	0.0713507	0.903672
541	YPK2	P18961		-2.14941	3.05112	0.00542275	-1.79824	4.54241	0.000560699	-0.698376	1.11374	0.31613	-0.757029	1.84319	0.0759388
41	CYC1	P00044	TRUE	-1.12989	3.04946	0.00542275	-0.480795	2.60423	0.00834191	0.317323	0.889989	0.401788	0.299218	0.615967	0.404061
1552	GRS1	P38088	TRUE	0.437978	3.05103	0.00542275	1.10569	4.59162	0.00053718	-0.111661	0.851604	0.416938	0.637178	2.76534	0.0273958
402	GLN4	P13188	TRUE	0.770145	3.05032	0.00542275	0.76231	1.75729	0.0356548	0.583546	2.36685	0.0830542	0.916975	2.06678	0.0562438
1149	GLC3	P32775		-1.96046	3.04599	0.00545462	-0.925883	3.78608	0.00142623	-0.166538	0.419814	0.651021	0.941191	2.42113	0.0369808
1183	YME2	P32843	TRUE	-2.0057	3.04502	0.00545516	-2.00018	4.69247	0.000485968	-0.673177	2.14813	0.104832	-0.707726	2.45393	0.0360877
1490	TYS1	P36421		1.45424	3.04034	0.00550258	2.15773	5.18567	0.000277189	0.829557	2.21377	0.0998817	1.14004	2.79472	0.0268385
3526	RBA50	Q04418		3.79486	3.03896	0.00550843	2.63114	2.29053	0.0140845	1.28956	1.12865	0.310151	NaN	NaN	NaN
1804	QNS1	P38795		-1.0691	3.03469	0.00553935	0.10605	0.226432	0.656021	-0.495268	1.78821	0.158842	-0.0932994	0.176447	0.775128
2110	NSA2	P40078		3.26437	3.03531	0.00553935	0.481102	0.371949	0.49728	1.07259	0.51577	0.582164	-0.756567	0.373534	0.583166
1719	YGP1	P38616		-1.41694	3.02919	0.00559822	0.103445	0.0432947	0.922754	-0.143372	0.361813	0.692464	0.64589	0.325254	0.62812
1599	UBP13	P38187		-3.41125	3.02329	0.00566281	-2.26862	4.42826	0.00061731	-2.53825	2.39192	0.0813739	-0.711177	1.79437	0.080708
3257	GRX5	Q02784	TRUE	-1.12194	3.02168	0.00567195	-0.963412	3.10011	0.00385472	0.272551	0.625486	0.517138	0.385269	1.15222	0.1926
3286	VPS30	Q02948		1.37758	3.0189	0.00569648	0.914262	2.5871	0.00855646	0.596065	1.09708	0.320624	-0.0254836	0.0614728	0.917165
3351	VPS60	Q03390		-2.00497	3.00278	0.00589151	-0.317889	0.333569	0.535555	-0.156806	0.28428	0.756009	0.44829	1.93615	0.0671684
2969	COP1	P53622		-0.519695	3.00246	0.00589151	-0.374676	1.99408	0.0235128	-0.0464773	0.218099	0.808371	-0.133803	0.386775	0.570764
909	LAC1	P28496		-1.02043	2.99834	0.00593538	-1.05165	0.310191	0.560266	NaN	NaN	NaN	NaN	NaN	NaN
1371	ASK1	P35734		-1.03925	2.99544	0.00596267	-0.191707	0.161208	0.73759	-0.373674	1.34497	0.241566	-0.225039	0.145921	0.809244
2233	FMC1	P40491	TRUE	-2.9203	2.9896	0.00599506	-0.704888	0.345	0.52283	-0.871933	1.0966	0.320624	0.307653	0.166615	0.786337
426	TFS1	P14306		-1.24095	2.9895	0.00599506	-0.478037	0.682394	0.273101	-0.165599	0.304955	0.738674	0.388978	1.0722	0.21425
2084	HMF1	P40037	TRUE	-1.21654	2.99146	0.00599506	0.938439	2.3464	0.0127388	-0.00773621	0.0171178	0.982653	0.888481	3.30682	0.0165101
1215	SUI1	P32911		0.779984	2.99049	0.00599506	1.0068	2.89726	0.00528439	-0.00332928	0.0112364	0.988175	0.401357	0.97176	0.247576
2520	MDV1	P47025	TRUE	-1.99721	2.98314	0.00607102	-1.7712	2.9978	0.00449989	-0.421797	0.614378	0.520609	-0.435376	0.59112	0.418917
231	RPS19B;RPS19A	P07281;P07280		1.12755	2.97693	0.00614576	1.15049	4.74097	0.000465716	0.291959	0.907355	0.393559	-0.109425	0.394948	0.563689
797	YDJ1	P25491		0.867961	2.97125	0.00621399	0.54976	1.98352	0.0239976	0.0168333	0.0560117	0.950674	-0.455537	1.0747	0.213546
2695	UBP15	P50101		-1.68387	2.96777	0.00625115	-1.77401	3.92617	0.00117474	-0.271277	0.585754	0.536893	-0.416769	1.78996	0.080708
1462	SHB17	P36136		1.01064	2.96413	0.00629101	1.69855	4.19171	0.000809916	0.0757351	0.29677	0.744822	0.775247	2.60838	0.0305899
1625	ZTA1	P38230		-1.14364	2.96203	0.00630333	-1.34402	4.18949	0.000809916	0.098825	0.25498	0.776947	-0.480274	2.25714	0.0447157
2860	YGR012W	P53206	TRUE	-0.962749	2.96072	0.00630333	-1.09107	3.76422	0.00146841	-0.195163	0.622745	0.517985	-0.627203	1.36289	0.140984
1791	CIC1	P38779		1.53099	2.96063	0.00630333	1.14049	1.99025	0.023689	0.368987	0.552713	0.556023	0.132108	0.245547	0.703691
890	NAM9	P27929	TRUE	-1.49124	2.94859	0.0064675	-2.23531	3.50037	0.00207703	-0.421256	1.32923	0.245966	-0.518562	1.30367	0.154563
500	STF2	P16965		-3.34177	2.9437	0.00652752	-2.293	1.82929	0.0312092	-0.575357	0.908319	0.393559	0.355181	0.47463	0.497704
1803	TRM5	P38793	TRUE	1.67424	2.94033	0.00656516	0.965112	3.55754	0.00194772	0.2564	0.280906	0.756639	-0.22533	0.238598	0.710151
3649	HRI1	Q05905		1.1519	2.93646	0.00661066	1.63196	2.43877	0.0109881	-0.0324969	0.0364469	0.969991	0.508141	0.533593	0.456993
1454	SAP190	P36123		-2.5219	2.93515	0.00661727	-3.14555	4.31474	0.000709178	-1.89352	1.36295	0.24028	-2.54999	2.35017	0.040435
4241	ARP8	Q12386		-1.71058	2.93406	0.00662061	-1.72548	3.33225	0.00266908	-1.78421	1.71814	0.169921	-0.904814	1.88986	0.0712566
312	RPS4B;RPS4A	P0CX36;P0CX35		0.453912	2.93136	0.00664867	1.49315	3.56249	0.00194332	-0.156649	0.800026	0.441518	0.683595	1.84795	0.0757335
161	MET17	P06106		-0.788015	2.92813	0.00668489	-0.567691	1.71609	0.0385623	-0.683976	2.67976	0.0538759	0.437844	1.69573	0.0912375
901	UBC8	P28263		-1.64414	2.91906	0.0067843	NaN	NaN	NaN	0.877895	1.39529	0.236409	NaN	NaN	NaN
2661	COQ5	P49017	TRUE	-1.49404	2.92015	0.0067843	-1.17269	1.31339	0.0812803	-0.364235	0.528012	0.576453	-0.0927925	0.0603924	0.918699
57	SOD2	P00447	TRUE	-1.00841	2.91742	0.0067843	-0.658858	1.68992	0.0404781	0.0500364	0.0909779	0.916996	0.39862	0.747139	0.335046
46	ADH1	P00330		0.730873	2.91802	0.0067843	2.82507	3.22423	0.0031547	0.699848	2.9824	0.0407542	1.10064	1.13716	0.196599
3183	RPA49	Q01080		1.40082	2.91872	0.0067843	1.77931	3.01917	0.004359	-0.0604663	0.0755385	0.934337	-0.0617113	0.0675586	0.909395
807	GID7	P25569		-2.19262	2.91501	0.00680202	-3.40759	2.13566	0.0182824	-1.56721	2.28807	0.0892346	-1.33459	2.04919	0.0580012
598	OLE1	P21147		2.10478	2.91457	0.00680202	NaN	NaN	NaN	0.36963	0.426937	0.647435	3.90709	2.20752	0.0468047
2490	SPC1	P46965		-1.35115	2.91355	0.00680465	-1.20363	1.49034	0.058607	-0.467391	0.656268	0.505789	-0.635239	1.07404	0.213692
540	COQ1	P18900	TRUE	-1.22857	2.91108	0.00683015	-1.82821	1.19901	0.101399	-0.326201	0.601277	0.527879	-0.611648	0.331222	0.622962
4337	PGA3	Q12746		1.69407	2.90985	0.00683609	0.822977	1.94178	0.025766	0.47928	0.732591	0.4678	-0.973331	1.22505	0.172842
1385	YNK1	P36010	TRUE	-0.80553	2.88679	0.00716792	-0.694864	2.47496	0.0103555	-0.079196	0.424105	0.648133	-0.14231	0.432587	0.531882
91	RPS17B;RPS17A	P14127;P02407		0.643972	2.88673	0.00716792	1.35268	3.46432	0.00219461	-0.392529	1.87951	0.144681	0.419536	1.14006	0.196599
271	ILS1	P09436		0.928353	2.88709	0.00716792	1.58656	5.65762	0.000190106	-0.0531178	0.425011	0.648133	0.685099	2.80489	0.0263675
2353	GLR1	P41921	TRUE	-0.593394	2.88541	0.00717583	-0.35864	1.50011	0.0575664	-0.267972	0.994355	0.361941	0.00328255	0.0095147	0.986661
995	EFT1	P32324		0.471377	2.88206	0.00721739	0.623804	4.4604	0.000601248	0.227139	1.54954	0.199642	-0.0516329	0.391982	0.566503
482	PDA1	P16387	TRUE	-0.688016	2.88094	0.00722201	-0.665741	3.85768	0.00131157	-0.0928421	0.670181	0.498027	-0.37714	3.28068	0.0166324
4006	PGC1	Q08959	TRUE	-1.16188	2.8731	0.00731132	-1.78661	4.21761	0.000786766	-0.443287	0.705546	0.479738	-1.29697	2.46892	0.0358186
931	RPL8B	P29453		0.757972	2.87325	0.00731132	1.07958	4.49435	0.000581571	-0.0354881	0.133857	0.884057	0.441483	2.50664	0.0344486
1862	PFS1	P38872		6.10346	2.87458	0.00731132	NaN	NaN	NaN	7.39932	3.34943	0.0244457	NaN	NaN	NaN
2934	GND2	P53319		-1.824	2.86463	0.0074268	-2.14188	1.9615	0.0249058	-0.7643	1.18529	0.291752	-0.32736	0.202642	0.748135
272	MIS1	P09440	TRUE	1.02195	2.86473	0.0074268	0.828094	2.06431	0.0208301	-0.317554	1.01846	0.353264	-0.495272	0.619488	0.402544
805	SRO9	P25567		1.01233	2.86012	0.00748349	1.70673	4.63867	0.000518631	0.0195699	0.0427482	0.965584	0.400999	1.51939	0.115384
3799	YLR413W	Q06689		5.39854	2.85967	0.00748349	NaN	NaN	NaN	NaN	NaN	NaN	NaN	NaN	NaN
4192	CRC1	Q12289	TRUE	-2.22069	2.85608	0.00751686	-3.78427	4.19667	0.000807934	-0.733908	0.957846	0.376371	-0.847213	1.41108	0.13336
2027	TIF4632	P39936		0.954067	2.85654	0.00751686	1.37767	3.39067	0.00244052	-0.0347204	0.185625	0.833809	1.05764	3.31116	0.0165101
146	RPL33A	P05744		0.773179	2.85486	0.00752369	1.12221	2.41631	0.0114163	0.142635	0.347424	0.705407	0.221087	0.940948	0.259291
3603	EIS1	Q05050		-1.39634	2.8516	0.00756606	-0.817876	1.71684	0.0385177	-0.644745	1.37734	0.239568	-0.249371	0.380652	0.576622
4371	YIL002W-A	Q3E7Z5		1.9878	2.84929	0.00759215	1.60294	2.0396	0.0217109	NaN	NaN	NaN	0.0302587	0.0534626	0.925976
343	GPA2	P10823		-2.2248	2.84484	0.0076271	-2.57234	3.70659	0.00158835	0.311394	0.210371	0.81237	-0.0573521	0.0796667	0.890538
4370	RPS22B;RPS22A	Q3E7Y3;P0C0W1		0.635631	2.84536	0.0076271	1.49787	3.55753	0.00194772	-0.137188	0.642545	0.509676	0.987281	2.16665	0.0486486
3517	PUF6	Q04373		1.52546	2.84492	0.0076271	0.810836	3.34289	0.00262688	0.554521	1.39646	0.236409	-0.0487819	0.274945	0.676656
2083	GIP2	P40036		-2.51892	2.83906	0.00771495	-1.86701	1.79991	0.032926	-0.595697	0.800809	0.441518	0.520947	0.427885	0.535168
2289	IRC24	P40580		-1.34735	2.83784	0.00772206	-0.773611	2.64631	0.00774668	-0.170182	0.297177	0.744471	-0.0123525	0.0263295	0.963391
1222	YPT7	P32939		-1.09983	2.8298	0.00782896	-0.142177	0.189322	0.703187	-0.690982	1.69664	0.173345	-0.133699	0.147931	0.806396
1944	CCT2	P39076		1.02084	2.82864	0.00782896	1.43387	5.74355	0.000190106	0.355455	1.19899	0.28763	0.283332	0.792764	0.317002
1688	ENP1	P38333		1.53086	2.83057	0.00782896	0.947176	2.12057	0.0187684	0.328703	0.579605	0.540224	-0.0864949	0.133402	0.827131
2909	LSB1	P53281		1.90957	2.82906	0.00782896	1.93879	1.59933	0.0480728	1.07997	1.63343	0.182526	0.964447	0.567386	0.434233
361	PHO8	P11491		-0.914117	2.82376	0.00787474	-0.707884	1.05633	0.132762	-0.4327	1.35345	0.240539	-0.0679469	0.126638	0.833973
1799	SSF1	P38789		1.8453	2.82417	0.00787474	0.418527	0.655011	0.288108	-0.0774322	0.106795	0.900775	-1.35832	1.77542	0.0819756
586	HCA4	P20448		2.39798	2.82369	0.00787474	0.778098	0.935668	0.167334	0.022603	0.017538	0.982653	-0.720627	0.918795	0.266288
476	ABP1	P15891		-0.623431	2.82144	0.00790112	-0.17904	1.18279	0.104739	0.0340195	0.235623	0.791845	0.258104	1.03959	0.22522
682	URE2	P23202		-1.41502	2.82004	0.00791208	-1.28704	1.90278	0.0275244	-0.421108	0.433267	0.641298	-0.457399	1.13321	0.197532
1741	MSC7	P38694		-0.986563	2.8192	0.00791282	-1.09744	1.9476	0.0255038	-0.194367	0.555098	0.554428	-0.665803	1.72038	0.0884125
3579		Q04869		-0.945931	2.81328	0.00800675	-0.858982	1.4764	0.060212	-0.175699	0.55653	0.554216	0.272277	0.811928	0.30895
2686	PHB2	P50085	TRUE	-1.298	2.80914	0.00800856	-0.841909	4.40896	0.000631918	0.00220013	0.00309454	0.998258	0.106306	0.364367	0.592689
2272	DOT5	P40553		-1.03377	2.81052	0.00800856	-0.567354	0.715238	0.256334	-0.301833	0.736263	0.466584	0.447063	0.499465	0.478814
854	RPL5	P26321		0.66842	2.80844	0.00800856	0.92027	3.90407	0.00121908	0.323651	1.2018	0.286597	0.141809	0.412825	0.550209
216	CDC33	P07260		0.73477	2.81106	0.00800856	0.908202	2.52217	0.00954593	0.0751057	0.176258	0.842649	0.136085	0.229369	0.717859
1066	KRE6	P32486		1.99124	2.81216	0.00800856	0.414547	0.746771	0.240967	0.976825	1.67809	0.174141	0.347232	0.402361	0.557252
1467	UTP30	P36144		2.43823	2.80895	0.00800856	1.50883	1.55351	0.0521881	NaN	NaN	NaN	0.492276	0.536639	0.454744
1018	ERG3	P32353		1.97946	2.80695	0.00802152	3.21903	3.5198	0.00202446	0.539717	0.500194	0.592545	2.05522	2.16109	0.0487342
4355	YBR255C-A	Q3E776	TRUE	-1.65679	2.80508	0.00804147	NaN	NaN	NaN	-0.628361	1.92362	0.136446	1.91668	0.747678	0.334834
1476	ECM4	P36156	TRUE	-3.22342	2.8017	0.0080893	-1.7182	0.867421	0.190461	-0.421166	0.383957	0.680962	0.479876	0.281807	0.669931
911	YIM1	P28625		-1.04542	2.80016	0.0080893	-1.69042	3.12338	0.00370413	-0.138725	0.282517	0.756009	-0.637791	1.3538	0.142612
4130	FCY1	Q12178		1.30237	2.80074	0.0080893	-0.0920548	0.0573787	0.897682	0.5689	0.46634	0.617223	-0.47506	0.336443	0.618278
2623	RPS7B	P48164		0.975332	2.79926	0.00809164	1.42791	3.60205	0.00182654	-0.00650692	0.0118595	0.98739	0.143926	1.22733	0.172749
4315	TMA17	Q12513		-1.86751	2.79668	0.00812268	-1.6809	3.41174	0.00238114	-0.445844	0.616483	0.519737	0.735497	1.96813	0.0648425
450	HSC82	P15108		0.731852	2.79604	0.00812268	1.30698	5.71892	0.000190106	0.211656	0.902643	0.395681	0.699424	4.39339	0.00497826
794	RPS2	P25443		0.798485	2.79025	0.00821704	0.960235	4.23266	0.000771231	0.2236	0.872245	0.407462	0.201215	0.703646	0.356887
3218	MRPL13	Q02204	TRUE	-1.65409	2.7893	0.00822038	-0.910386	1.55462	0.0521094	-0.0817366	0.0804013	0.929847	0.293456	0.518841	0.465931
1120	FBP26	P32604		-2.11832	2.78694	0.00823591	-1.64841	3.8492	0.001325	-0.867465	2.4205	0.0781689	-0.423937	1.99698	0.0618865
1338	CPR5	P35176		-1.02045	2.78715	0.00823591	-0.884856	2.11563	0.0189326	0.00215292	0.00368612	0.998161	-0.597233	1.49664	0.11822
1164	COX13	P32799	TRUE	-1.08964	2.78495	0.00825899	-0.860962	2.11875	0.0188236	0.0886521	0.249397	0.780748	0.00337076	0.00431231	0.994517
3393	CLU1	Q03690		-0.708435	2.77525	0.00843078	-0.725123	3.15409	0.00352434	-0.0797453	0.332075	0.717994	-0.322234	1.50003	0.117443
3940	NOB1	Q08444	TRUE	2.14614	2.77227	0.0084737	0.269808	0.1721	0.723888	1.36136	1.68965	0.173365	-1.0162	0.695709	0.361142
2868	IMO32	P53219	TRUE	-2.44201	2.76622	0.0085496	-4.04321	2.00644	0.0230112	-0.502261	0.480732	0.606433	-0.903186	2.52226	0.0342359
2463	NUP85	P46673		-1.21314	2.76611	0.0085496	-0.488223	0.835416	0.202065	-0.832457	1.77353	0.160967	-0.319117	0.686122	0.36681
2339	DIM1	P41819		1.96508	2.7662	0.0085496	1.88065	2.41827	0.0113745	NaN	NaN	NaN	0.156242	0.110119	0.851229
2676	RNR4	P49723		-0.636236	2.76426	0.00857095	-0.207737	0.602406	0.316973	0.0923557	0.348436	0.70421	0.295881	0.824511	0.302631
4385	YKL033W-A	Q86ZR7		-1.01525	2.75878	0.00866469	-1.20307	0.739927	0.243692	-1.44034	1.68503	0.173402	0.541142	0.658961	0.382131
418	DPM1	P14020		-1.06578	2.75723	0.0086667	-0.397322	1.45498	0.0626885	-0.312332	0.98081	0.366502	0.36857	0.98778	0.242805
3092		P53952		2.08813	2.75716	0.0086667	NaN	NaN	NaN	NaN	NaN	NaN	NaN	NaN	NaN
1993	GDH3	P39708		-1.16898	2.75258	0.0087299	-1.00188	2.2715	0.0145914	-0.214875	0.744292	0.460995	0.00257492	0.00494114	0.994428
2064	NUG1	P40010		1.77531	2.7525	0.0087299	0.889005	3.47817	0.00214727	0.773604	1.24251	0.276142	0.284821	0.743023	0.336782
1493	MRPL7	P36519	TRUE	-2.60796	2.75009	0.00874797	-2.86528	2.98304	0.00461889	-0.834841	0.963944	0.373224	-0.581507	0.717988	0.348973
333	MAS1	P10507	TRUE	-1.25992	2.75057	0.00874797	-0.803857	1.25009	0.0916357	-0.748833	1.88856	0.143263	-0.660041	1.79158	0.080708
903	OXP1	P28273		-1.26437	2.74591	0.00880899	-1.36138	2.95156	0.00484512	-0.348669	0.842027	0.421118	-0.374157	0.590509	0.418917
3580	ADH6	Q04894		0.624964	2.74489	0.00880899	1.50727	2.77231	0.00641944	0.410311	1.91406	0.137989	0.869855	1.65702	0.0954974
2041	PTC2	P39966		0.889772	2.74483	0.00880899	1.71328	2.90896	0.00517431	0.606491	2.31926	0.0878527	0.852205	1.06712	0.215576
2393	GCN20	P43535		0.576512	2.74376	0.00881548	0.670729	2.43398	0.0110816	0.0556068	0.522481	0.578107	0.0999222	0.337883	0.617308
4267	ZRT2	Q12436		2.658	2.74019	0.00887305	NaN	NaN	NaN	NaN	NaN	NaN	NaN	NaN	NaN
992	AFG1	P32317	TRUE	-2.11366	2.73494	0.00891978	-2.60869	2.49358	0.0100254	-0.86616	0.911663	0.393223	-1.32003	1.78874	0.080708
151	RPS9B	P05755		0.813528	2.73632	0.00891978	0.999804	5.35217	0.000248041	0.0369005	0.100205	0.905662	0.258549	1.48482	0.119466
2237	LYS12	P40495	TRUE	0.876463	2.73645	0.00891978	1.13379	2.65056	0.00772345	0.295853	1.05789	0.335883	0.205204	0.891153	0.278004
863	RPL16A	P26784		1.98055	2.7351	0.00891978	1.85828	2.98203	0.00462386	0.960676	1.47258	0.220023	0.517401	0.806279	0.311233
3130	ERG13	P54839		0.517778	2.73267	0.00895115	0.0612583	0.438167	0.436947	-0.059576	0.403662	0.667415	-0.0412483	0.256411	0.693524
1042	ATP11	P32453	TRUE	-1.52517	2.7297	0.00898205	-1.24861	1.04772	0.134903	-0.209293	0.659614	0.503446	0.125149	0.0649541	0.913369
2051	SNU13	P39990		1.53391	2.72987	0.00898205	2.06522	3.94366	0.00114367	-0.000881195	0.000891845	0.998894	0.635549	1.58296	0.104872
1760	DBP8	P38719		4.00707	2.72831	0.00899574	0.969859	1.57127	0.0504678	1.88163	0.914157	0.392354	-0.297701	0.250326	0.700465
3293	UME1	Q03010		-1.50338	2.72608	0.0090266	-1.65202	3.35325	0.00257751	-0.0401335	0.0495284	0.959674	-0.609228	0.574041	0.429525
88	VAR1	P02381	TRUE	-1.76378	2.71862	0.00916614	-2.02981	3.08279	0.00396292	-0.0267658	0.0436476	0.964939	-0.65851	0.969807	0.248358
2962	LSC1	P53598	TRUE	-0.658741	2.71796	0.00916614	-0.133889	0.48346	0.398845	0.28327	1.38084	0.239046	0.518289	2.54257	0.0335646
1083	PAN1	P32521		-0.617284	2.71188	0.00927975	0.131973	0.24262	0.637088	-0.466951	1.63152	0.182526	-0.117282	0.3309	0.622962
2556		P47085		-2.04343	2.71031	0.00929761	-2.46668	3.66277	0.00169246	0.0298109	0.0871894	0.92128	-0.49116	1.37289	0.138947
3379		Q03648		-1.26062	2.70885	0.00931334	-1.88772	1.40678	0.0685612	-0.23629	0.277282	0.760602	-1.59114	4.21082	0.00676753
4162	RUP1	Q12242		-3.446	2.70044	0.00947141	-2.02988	0.905801	0.177218	-2.02674	2.07544	0.114714	-0.692591	0.323046	0.630777
4388	YBR126W-A	Q8TGU7		-1.72424	2.70009	0.00947141	-2.99406	2.85535	0.00557809	0.181754	0.240865	0.786942	NaN	NaN	NaN
2778	SDT1	P53078		2.24081	2.68758	0.00972451	0.397947	0.219755	0.663917	NaN	NaN	NaN	NaN	NaN	NaN
1228	UBC6	P33296		4.13629	2.68719	0.00972451	-0.191069	0.233967	0.647377	NaN	NaN	NaN	0.599319	1.23121	0.171537
902	URA1	P28272		1.11652	2.68265	0.00981043	1.1556	2.38476	0.0119634	0.0927529	0.198559	0.82077	0.623278	0.85484	0.289825
2775	SHE10	P53075		-1.25597	2.67855	0.00988705	-1.54693	5.53572	0.000199594	-0.382398	0.91094	0.393231	-0.862505	3.34745	0.0163562
2631	ARH1	P48360	TRUE	-2.6766	2.66507	0.0101505	-1.63367	2.72867	0.00685116	-1.46022	1.12223	0.312726	-0.570568	1.18892	0.182333
1422	CAB3	P36076		-1.49291	2.66568	0.0101505	-0.727354	0.965681	0.158004	-0.491547	0.72483	0.469882	-0.277061	0.289609	0.661307
112	PAB1	P04147		0.610587	2.66497	0.0101505	1.42919	6.29933	0.000184285	0.0476103	0.169247	0.848578	0.86079	4.77583	0.00322445
81	INH1	P01097	TRUE	-1.44794	2.66145	0.0102161	-1.49994	3.49896	0.00207703	-0.0624771	0.0732275	0.935428	-0.707922	1.86288	0.0744481
1531	RPL32	P38061		0.999732	2.65905	0.010256	0.939056	3.80313	0.00137895	0.263392	0.630122	0.513415	0.272493	1.36824	0.139699
2491	RPE1	P46969		-1.16341	2.65743	0.0102605	0.434898	0.455268	0.422638	-1.12566	2.06307	0.115675	-0.518982	0.352413	0.603316
2717	AVT4	P50944		4.56717	2.65753	0.0102605	NaN	NaN	NaN	2.65854	3.18479	0.0318684	NaN	NaN	NaN
3034	ALG9	P53868		-1.85326	2.65194	0.0103742	-1.70762	1.47561	0.060291	0.310444	0.527773	0.576453	-2.09292	3.29045	0.0165101
1056	FPR2	P32472		-1.75501	2.64989	0.0103744	-1.0457	2.3769	0.0120771	-0.043756	0.18832	0.832999	0.109692	0.1513	0.801641
269	PRB1	P09232		-0.837754	2.65076	0.0103744	-0.555674	2.05603	0.0210452	0.0154676	0.0275672	0.977665	0.355813	1.69899	0.0912375
428	FBA1	P14540	TRUE	0.56841	2.6498	0.0103744	1.90404	3.64041	0.00175123	0.518915	2.88854	0.0437341	0.719127	1.22652	0.172842
2111	LCP5	P40079		2.76867	2.64814	0.0103972	-0.0440512	0.0199418	0.962969	0.438599	0.225043	0.802065	-0.958357	0.78003	0.322571
1990	NUP60	P39705		1.01283	2.64469	0.0104632	0.644768	2.48789	0.0101132	0.274861	0.503541	0.59044	-0.213058	0.334105	0.620264
4227	ATO3	Q12359		-3.09836	2.64307	0.0104829	-2.78938	2.68286	0.00732633	-0.137301	0.206305	0.816276	0.191243	0.455835	0.51377
1001	OAC1	P32332	TRUE	0.789548	2.64246	0.0104829	-0.115043	0.260907	0.61571	0.272611	0.437345	0.638782	-0.769372	1.59535	0.103267
2677	HNT2	P49775	TRUE	-3.95514	2.64164	0.0104858	-2.52437	2.1949	0.0165979	-2.46517	1.72749	0.167372	-2.0168	1.40348	0.134189
289	RPL27A;RPL27B	P0C2H6;P0C2H7		0.78867	2.64038	0.0104994	0.867666	4.29113	0.000728977	0.194563	0.735224	0.467285	0.39216	1.63441	0.09789
2746	MSN5	P52918		-2.56975	2.63916	0.0105119	-1.39152	1.41425	0.067725	0.755923	0.501416	0.591931	0.7434	1.41556	0.132583
643	PRE1	P22141		-0.56676	2.63821	0.0105179	-1.72311	3.50864	0.00205395	-0.192192	0.393737	0.674214	-0.565704	2.06177	0.0567053
471	UBC5	P15732		-1.54691	2.63581	0.0105593	-1.27698	3.3629	0.00254164	-0.092433	0.130181	0.886377	-0.180727	0.204563	0.746279
871	GSY2	P27472		-2.13492	2.63401	0.0105861	-2.37078	5.64185	0.000190106	-0.129259	0.823172	0.433964	-0.558934	1.13142	0.198173
2352	YRB1	P41920		1.06273	2.6329	0.0105963	0.741165	1.27474	0.0875366	0.0214071	0.0243979	0.978546	-0.0753899	0.0645136	0.913499
1841	YHR138C	P38841		-3.77171	2.63041	0.0106053	-1.78143	2.60545	0.00834191	-0.337516	0.498966	0.593811	0.606414	0.857733	0.288484
962	MRPL9	P31334	TRUE	-1.98258	2.63135	0.0106053	-1.58077	2.70666	0.00709043	-0.30525	0.520612	0.579028	-0.51264	0.782169	0.321631
2848	PIB2	P53191		-1.57091	2.62993	0.0106053	-0.852586	1.30367	0.082744	-0.701942	1.68943	0.173365	-0.320479	0.308218	0.644079
2885	PIL1	P53252		-0.421329	2.62975	0.0106053	-0.41071	1.66845	0.042317	-0.0207682	0.0604769	0.947038	-0.181342	0.649851	0.385543
3156	ATP19	P81451	TRUE	-1.3763	2.62761	0.0106323	-0.7045	3.32104	0.00271821	0.274257	0.482127	0.60557	0.1893	0.303453	0.649802
4317	PAR32	Q12515		-1.06769	2.62727	0.0106323	-0.099999	0.231633	0.649827	-0.0225935	0.0325131	0.972346	0.617325	1.83104	0.0766357
19	STE2	D6VTK4		3.12403	2.62583	0.0106509	NaN	NaN	NaN	NaN	NaN	NaN	NaN	NaN	NaN
1414		P36059		-1.89338	2.62506	0.0106529	-1.8635	2.86224	0.0055461	-0.239168	0.338349	0.713937	-0.971903	2.06884	0.0561471
2214	ASG1	P40467		-2.82654	2.62294	0.0106882	-1.62776	1.8654	0.0293274	-0.682392	2.51278	0.0671292	-1.29111	1.65472	0.0954974
1175	NGR1	P32831		-2.80051	2.62018	0.0107223	-3.19856	3.62255	0.001784	-0.154091	0.172949	0.847404	-0.650496	0.594522	0.416832
3936	CUE5	Q08412		-0.980289	2.62046	0.0107223	0.248451	1.27873	0.086943	0.0666375	0.140244	0.879377	0.62152	2.6914	0.0281889
3094	ALG11	P53954		-2.28139	2.61907	0.010733	-3.89224	4.7816	0.000445689	-1.26569	1.83161	0.152608	-1.25568	1.80417	0.0796247
386	LAT1	P12695	TRUE	-0.677155	2.61686	0.0107707	-0.762708	2.89273	0.00529113	-0.0885353	0.26992	0.767179	-0.487926	1.25493	0.165755
493	TUP1	P16649		0.627396	2.61542	0.0107897	1.04953	3.59002	0.00185878	0.0865636	0.249845	0.780748	0.903729	3.12529	0.018759
3720	EMG1	Q06287		1.30469	2.61442	0.0107975	0.695154	3.03561	0.00424598	0.355103	0.819056	0.434681	-0.62439	2.04142	0.0588009
4030	GPM2	Q12008		-1.6406	2.61233	0.0108314	-1.58193	2.94358	0.00491104	-0.069653	0.170854	0.848118	0.40316	1.25558	0.165755
2363	VNX1	P42839		-1.51643	2.61171	0.0108314	-1.48908	1.46658	0.0613402	0.0776877	0.105183	0.902156	0.949093	0.931769	0.262404
1789	YHR045W	P38775		-3.02201	2.61062	0.0108351	-2.28939	3.65296	0.00171612	-1.0198	1.05052	0.338762	-0.981332	1.32651	0.148141
1724	CBR1	P38626		-0.761896	2.61021	0.0108351	-0.804921	3.35032	0.00258722	-0.275123	0.987207	0.365187	-0.918598	2.26403	0.0447046
4307	AVL9	Q12500		-0.897575	2.60858	0.0108589	2.19078	1.12411	0.116345	-0.880262	3.05657	0.0361407	1.78283	0.989697	0.242346
3391	ADI1	Q03677		-2.86274	2.60526	0.0109255	-2.4126	3.8772	0.00127445	-0.316261	0.704778	0.479738	-0.0218787	0.0135331	0.979821
836	TAH1	P25638		-2.47438	2.60055	0.010955	-3.22084	3.98306	0.00107545	-2.39784	3.63367	0.0167469	-0.588518	0.434169	0.530195
3755	SPN1	Q06505		-0.758028	2.60007	0.010955	-0.5803	2.05106	0.0212306	-0.355859	2.11841	0.106679	-0.120772	0.455073	0.514183
518	GLK1	P17709		-0.738351	2.60181	0.010955	-0.339109	1.69387	0.0402102	0.278164	1.31998	0.249558	0.197602	0.923495	0.264754
1751	DED81	P38707		0.548291	2.60226	0.010955	1.21495	4.71911	0.000478417	-0.12393	0.701053	0.481889	0.636008	2.29248	0.0434887
1855	NMD3	P38861		1.36238	2.60098	0.010955	1.07284	2.19317	0.0165979	0.37774	0.628058	0.514793	-0.0440149	0.0501019	0.930321
4172	TPO4	Q12256		2.86153	2.60183	0.010955	NaN	NaN	NaN	NaN	NaN	NaN	NaN	NaN	NaN
3780	BFR2	Q06631		1.27923	2.59603	0.0110404	1.62328	2.55279	0.00904961	-0.0641184	0.0704557	0.938141	0.679317	1.01707	0.232345
1275	MSN4	P33749		2.26544	2.59311	0.0110979	NaN	NaN	NaN	NaN	NaN	NaN	NaN	NaN	NaN
3751	YLH47	Q06493	TRUE	-1.01301	2.59131	0.0111269	-1.27868	4.67576	0.000493853	-0.0849705	0.148853	0.869802	-0.930863	0.846193	0.293871
1307		P34224	TRUE	-3.62081	2.58871	0.0111767	-4.36415	3.69469	0.00160396	-0.840091	0.537838	0.569109	-2.72461	2.63574	0.0297458
917	ARO2	P28777		0.678823	2.58273	0.0113145	0.645881	2.36963	0.0122094	-0.355525	1.52312	0.206624	-0.333797	1.06225	0.216724
198	FAS1	P07149		-0.523038	2.5812	0.0113267	0.201811	0.883608	0.185026	-0.134722	1.27157	0.265871	0.270113	1.00448	0.237154
1947	CCT6	P39079		0.77198	2.58094	0.0113267	0.422495	1.84524	0.0303354	0.189502	0.477778	0.609251	-0.177969	0.58127	0.424997
3620	DPL1	Q05567		-1.16757	2.57872	0.0113674	-1.82022	4.31518	0.000709178	-0.148248	0.282697	0.756009	-0.866628	2.0154	0.0605111
3048	FMP41	P53889	TRUE	-1.3202	2.57596	0.0114226	-1.85953	1.83522	0.0309146	-0.224716	0.548178	0.56071	-0.526679	0.837009	0.29771
2059	GIM4	P40005		1.8205	2.57466	0.0114397	NaN	NaN	NaN	0.43341	1.36947	0.239652	NaN	NaN	NaN
1628	RFS1	P38234		-2.11159	2.57359	0.0114506	-0.795664	0.531265	0.363265	0.14755	0.154074	0.863392	-0.0076704	0.00513614	0.994428
2295	MKT1	P40850		2.79808	2.56994	0.0115298	1.37595	2.02108	0.0225211	NaN	NaN	NaN	1.11547	1.03908	0.225301
1267	LOS1	P33418		2.03929	2.564	0.0116711	NaN	NaN	NaN	NaN	NaN	NaN	1.73059	3.57289	0.0128764
4332	HTZ1	Q12692		-1.211	2.56147	0.0117216	-1.05199	1.95391	0.0251997	-0.473632	0.694394	0.485526	-0.201387	0.162059	0.791958
3133	UFD2	P54860		-2.30258	2.55842	0.0117865	-1.34021	2.55864	0.00895957	-0.249388	0.22656	0.800288	-0.627812	1.12885	0.198659
2718	MIC27	P50945	TRUE	-1.87007	2.55611	0.0118316	-2.49279	4.87781	0.000406968	1.69197	4.19959	0.0071501	-0.243336	0.170293	0.78264
241	VAS1	P07806	TRUE	0.657285	2.55493	0.011846	1.47131	5.31864	0.000251907	-0.192478	0.791279	0.442825	1.0149	1.77696	0.0819756
3467	GPI17	Q04080		-3.0154	2.54487	0.0120999	-2.25799	2.24437	0.0152868	-1.07404	1.07994	0.326368	-1.74525	2.70296	0.0280515
3370	TDA1	Q03533		-2.29832	2.54443	0.0120999	-3.64004	3.21325	0.00321161	0.475219	0.509474	0.586259	0.308505	0.407084	0.553183
4090	WRS1	Q12109		1.10718	2.54303	0.0121209	0.995286	3.99002	0.00106144	-0.20916	0.359624	0.693722	0.155099	0.400469	0.558854
2082	PIC2	P40035	TRUE	-3.16883	2.54018	0.0121643	-3.30142	3.5996	0.00183309	-0.993569	1.05143	0.338457	-1.37588	2.29714	0.0433895
1752	YHR020W	P38708		1.04568	2.54031	0.0121643	2.07726	5.82993	0.000190106	-0.146862	0.304431	0.738674	1.12894	4.0899	0.00758576
4147	PUS1	Q12211		2.48242	2.53936	0.0121694	2.65916	2.60126	0.00837528	0.488551	0.32284	0.725345	0.733106	0.580977	0.42506
1589	BNA4	P38169	TRUE	-1.58559	2.53739	0.0122066	-1.94521	2.17187	0.0171867	-0.257722	0.266439	0.767922	-1.37711	2.28774	0.0434887
4309	RKM4	Q12504		2.6852	2.53663	0.0122099	-0.376584	0.221529	0.662236	0.0306015	0.0156765	0.983626	-0.565898	0.445227	0.521133
2013	RVS167	P39743		-0.567137	2.53585	0.0122138	-0.763924	3.18863	0.0033544	0.0288887	0.1096	0.898932	-0.671144	2.24595	0.0453858
123	HXK1	P04806	TRUE	-0.716496	2.53338	0.0122654	-0.0149574	0.0397627	0.928958	0.224272	0.765098	0.452957	0.71158	3.39979	0.0161363
2117	DDI1	P40087		-1.63725	2.52857	0.0123294	-2.19932	2.07239	0.020516	0.00866938	0.00786772	0.993011	-0.164368	0.193505	0.758457
1280	MRPS5	P33759	TRUE	-1.50842	2.5299	0.0123294	-2.56519	3.49808	0.00207743	0.762117	1.17885	0.29494	-0.937235	0.951972	0.254871
4216	PST2	Q12335		-0.810771	2.52863	0.0123294	-0.236515	0.363974	0.503921	0.334361	1.17001	0.29766	-0.0471592	0.0561179	0.922657
150	RPS3	P05750		0.648314	2.52863	0.0123294	1.24455	4.99767	0.000343959	0.10222	0.371957	0.690163	0.504101	2.35338	0.0402558
2023	SSP120	P39931		-1.44208	2.52401	0.0124232	-0.711576	1.63605	0.0448741	-0.24198	0.634594	0.51062	0.210557	0.620111	0.402544
2722	RPL37B	P51402		1.2459	2.52419	0.0124232	0.682874	1.95872	0.025024	0.190675	0.302687	0.740603	-0.00213242	0.00454361	0.994437
3230	ABF2	Q02486	TRUE	-0.882007	2.52321	0.0124277	-1.15425	2.89265	0.00529113	-0.517741	1.5835	0.191905	-0.334857	1.24003	0.168934
1952	COX14	P39103	TRUE	-1.81625	2.52073	0.0124625	-1.65264	2.51126	0.00970129	NaN	NaN	NaN	NaN	NaN	NaN
2664	ASN2	P49090		0.639533	2.5211	0.0124625	1.12561	3.41087	0.00238171	0.13727	0.546771	0.561506	0.424578	0.996484	0.240064
3206	RPS15	Q01855		1.34593	2.52006	0.0124638	0.976847	3.84998	0.001325	0.720749	1.37845	0.239568	0.249231	0.582776	0.424196
1827	APE4	P38821		-0.926304	2.51703	0.0125329	-0.908902	2.2099	0.0162186	-0.0822635	0.19338	0.827002	-0.13194	0.177218	0.775128
1298	TIF3	P34167		0.810507	2.51314	0.0126274	1.29952	3.64152	0.00175051	-0.125757	0.335408	0.715901	0.576099	1.9474	0.0664016
4022	SAM4	Q08985		1.82864	2.51153	0.0126558	1.34363	2.66943	0.00748954	-1.3528	1.28594	0.260069	0.326605	0.299922	0.652792
651	NPR1	P22211		-2.18569	2.50836	0.0127302	-2.19537	1.72766	0.0378041	-0.155166	0.230705	0.797097	0.161256	0.206612	0.743342
4020	YPL260W	Q08977		-0.66363	2.50734	0.0127419	-0.673603	0.773096	0.228671	-0.256435	0.883651	0.403218	-0.331001	0.300644	0.652082
64	PRC1	P00729		-0.760993	2.50626	0.012755	-0.182229	0.45299	0.424717	0.238986	0.676392	0.496406	0.182388	0.271423	0.679634
3200	MAP1	Q01662		1.13178	2.50557	0.0127571	0.906319	1.65	0.0438139	-0.100224	0.16488	0.854115	0.257648	0.350473	0.603916
524	PET9	P18239	TRUE	-0.699918	2.49843	0.0129498	-0.788924	4.0949	0.000904945	0.12242	0.375343	0.688336	-0.456556	2.40652	0.0377343
3423	YDR248C	Q03786		-2.44813	2.4941	0.0130421	-1.33387	1.55796	0.0518467	-0.328051	0.412149	0.659254	0.449315	0.435521	0.529291
4040	YTM1	Q12024		0.973653	2.49441	0.0130421	1.54167	4.28385	0.000728977	0.574888	0.684646	0.490463	1.17912	1.64107	0.0970514
1776	RPL14B	P38754		0.850011	2.48811	0.0132045	1.07151	2.57596	0.00872199	0.144319	0.323899	0.725023	0.619083	1.17459	0.186559
315	RPL23B;RPL23A	P0CX42;P0CX41		1.46382	2.48718	0.013214	2.03685	5.24374	0.000270832	0.634299	1.06438	0.333263	1.18258	3.61367	0.0127023
2602	IBA57	P47158	TRUE	-2.22621	2.48448	0.013265	-1.11789	0.426297	0.446947	-0.75271	1.34311	0.241788	0.391523	0.168545	0.784757
65	CAR1	P00812		0.47197	2.48427	0.013265	0.667772	2.51091	0.00970129	-0.0388842	0.171948	0.847673	0.147517	0.532167	0.457568
1526	ADE17	P38009		2.55369	2.47722	0.0134629	1.42226	1.86856	0.0291676	1.36148	1.36669	0.239652	0.975603	1.09416	0.20919
4184	HER1	Q12276		-1.34701	2.47096	0.0136391	-1.12328	1.23611	0.0941594	-0.842549	1.34902	0.240539	-0.127096	0.213816	0.733108
4276	OSH2	Q12451		-2.51666	2.46663	0.0137476	-4.95248	1.72206	0.0381648	-0.131628	0.135232	0.883849	-1.33297	1.69718	0.0912375
1019	NTH1	P32356		-1.25685	2.46628	0.0137476	-0.745843	2.83215	0.00578637	-0.44126	1.03687	0.345434	0.328298	1.71651	0.088669
599	SPE2	P21182		0.631743	2.46475	0.0137769	1.78182	2.62217	0.00808811	-0.269619	0.689392	0.486225	0.505774	0.441042	0.524325
1646	FES1	P38260		1.30036	2.4634	0.0137806	1.13929	2.68968	0.00725528	0.196378	0.861804	0.41149	0.812051	1.26907	0.162297
780	RRP7	P25368		1.7217	2.46352	0.0137806	-0.42107	0.236531	0.644545	0.105414	0.0627489	0.945092	0.16978	0.110495	0.850799
1159	YSC84	P32793		-1.92859	2.46138	0.0137866	-1.88862	1.51723	0.0557695	0.244319	0.608896	0.523632	-1.05546	1.49417	0.11839
947	SEC1	P30619		-1.60489	2.46221	0.0137866	-2.65191	4.59456	0.00053718	-0.596426	1.23582	0.27853	-1.06541	2.62582	0.0297458
2742	ALT1	P52893	TRUE	-1.0518	2.46152	0.0137866	-1.34938	1.97236	0.0244476	-0.166532	0.389383	0.677382	-0.480219	1.40346	0.134189
3508		Q04336		-1.81294	2.45818	0.0138499	-0.84213	2.41132	0.0115097	-0.401757	0.55496	0.554428	0.796716	2.26579	0.0446426
3634	HRD3	Q05787		4.20603	2.45878	0.0138499	2.95789	4.55965	0.000545002	6.47752	4.85574	0.00441899	3.25173	3.78662	0.0100652
3256	TIM50	Q02776	TRUE	-0.379148	2.45661	0.0138805	-0.168666	0.609748	0.313223	0.179075	0.950449	0.379202	-0.128	0.380579	0.576622
3861	AIM6	Q07716		-1.40857	2.45598	0.0138812	-1.81883	2.78962	0.00620354	-0.133256	0.223379	0.803098	-1.29626	1.40308	0.134189
3143	ACT1	P60010		-0.191211	2.45501	0.013893	0.253753	1.85435	0.0298481	-0.112572	0.952915	0.377861	0.193152	0.565752	0.435189
2321	ERG10	P41338		0.538253	2.45433	0.0138952	1.30324	5.12914	0.000293647	0.311584	1.83038	0.152608	0.890603	3.74269	0.010506
692	HYP2	P23301		0.684762	2.4511	0.0139795	0.468253	3.13715	0.00364396	0.254649	1.02802	0.347627	-0.0110941	0.0287653	0.959914
2487	CTK2	P46962		2.45284	2.44486	0.0141624	-1.61113	0.922418	0.171736	2.95828	2.91342	0.0437341	NaN	NaN	NaN
4085	RTK1	Q12100		-3.77009	2.44297	0.0142043	-2.52047	1.82465	0.0314513	-0.267827	0.116149	0.896222	-0.591082	0.402442	0.557252
97	REP1	P03871		-1.08109	2.44123	0.0142417	-1.42124	1.99951	0.0232965	0.132628	0.484951	0.603888	-1.29743	1.36162	0.141003
1955	MNN1	P39106		2.5873	2.43678	0.0143684	NaN	NaN	NaN	NaN	NaN	NaN	NaN	NaN	NaN
2009	MTW1	P39731		1.07887	2.43572	0.0143837	-0.555708	0.578543	0.331683	NaN	NaN	NaN	-0.114387	0.0830068	0.886487
1806	PTC7	P38797	TRUE	-0.747777	2.43492	0.0143903	-0.467215	2.17435	0.0171829	0.105661	0.288257	0.754083	-0.17651	0.622151	0.401393
4372	YOR020W-A	Q3E824	TRUE	-1.65204	2.43334	0.0144231	-2.08576	2.63354	0.00794722	0.65075	0.761707	0.454038	-0.786115	0.735043	0.341602
1452	RPC37	P36121		1.66699	2.4325	0.0144309	2.41788	2.51792	0.00959704	-0.0227942	0.0179527	0.982439	-0.106922	0.045263	0.936616
1271	RPS1A	P33442		0.700318	2.43108	0.0144584	0.879728	3.65325	0.00171612	-0.0217171	0.0505125	0.958537	0.0426054	0.225603	0.719578
1883	RPB11	P38902		0.821504	2.43036	0.0144627	1.05747	2.85765	0.00557425	0.294685	0.594851	0.531507	0.828872	1.19685	0.180737
3820	POS5	Q06892	TRUE	-1.07127	2.42505	0.0146004	-2.13737	3.42413	0.00232623	0.0856323	0.0855828	0.923382	-1.56224	2.75866	0.0273958
3315		Q03177		3.67986	2.42563	0.0146004	2.13803	2.6525	0.00769644	3.3927	2.07812	0.114637	2.19601	2.73604	0.0278205
3564	GAL83	Q04739		1.7407	2.42259	0.0146634	NaN	NaN	NaN	0.779847	0.500206	0.592545	NaN	NaN	NaN
1954	PLB1	P39105		-1.77296	2.41889	0.0147688	0.408781	0.422036	0.450599	-0.0637207	0.0401182	0.967298	0.474288	0.792435	0.317002
2807	ITC1	P53125		-5.68985	2.41623	0.0147945	-3.31426	1.8658	0.0293274	-1.49195	1.66988	0.174709	-0.195901	0.131879	0.829009
2883	TWF1	P53250		-1.65918	2.4146	0.0147945	-1.26319	4.33021	0.000707822	-0.676048	0.701116	0.481889	-0.380244	1.56207	0.107928
4136	RKI1	Q12189		-1.33618	2.41626	0.0147945	0.387753	0.370735	0.498258	-1.25016	1.87511	0.145231	0.398294	0.359624	0.596239
1113	SWI3	P32591		-0.791408	2.41708	0.0147945	-1.0432	2.45902	0.010641	-0.196528	0.45403	0.62685	-0.285008	0.213275	0.733737
2845	PNC1	P53184		-0.693187	2.41546	0.0147945	-1.58176	3.74602	0.0015069	0.0813694	0.240378	0.786942	-0.746021	1.99177	0.0623844
1474	DRE2	P36152	TRUE	3.44291	2.41501	0.0147945	1.71993	2.71728	0.00698998	1.28408	0.924493	0.387894	0.535127	0.614978	0.404441
3745	PIN3	Q06449		-1.22221	2.41078	0.014826	-0.4238	0.734161	0.24649	0.389372	0.635607	0.51062	0.200396	0.454439	0.514444
120	THS1	P04801		0.554579	2.41157	0.014826	1.04707	4.79432	0.000436127	0.0227079	0.0788292	0.930358	0.590048	3.32261	0.0165101
465	FRS2	P15625		0.596477	2.41233	0.014826	1.45612	3.63311	0.00176927	-0.233114	0.642776	0.509676	0.791716	2.30334	0.0430786
2370	KRI1	P42846		1.75246	2.41291	0.014826	0.625578	1.91008	0.027188	0.240166	0.172639	0.847672	-0.775578	0.866873	0.285561
1434	TTI1	P36097		3.03284	2.41075	0.014826	NaN	NaN	NaN	NaN	NaN	NaN	NaN	NaN	NaN
239	LYS2	P07702		2.19225	2.40918	0.0148599	NaN	NaN	NaN	NaN	NaN	NaN	NaN	NaN	NaN
1057	PDB1	P32473	TRUE	-0.715652	2.40173	0.0150564	-0.641594	1.94785	0.0255038	-0.179636	1.17753	0.295341	-0.357673	1.42654	0.130887
3886	MEU1	Q07938	TRUE	0.977224	2.40221	0.0150564	0.319931	1.63995	0.0445947	-0.303478	0.654804	0.506208	-0.487348	1.15014	0.193097
935	MCM2	P29469		1.78496	2.40225	0.0150564	-1.37894	1.97426	0.0244035	0.60206	0.3701	0.690473	-0.268559	0.847857	0.292943
4393	VPS5	Q92331		-1.48223	2.40027	0.0150869	-1.53175	3.52936	0.00201096	-0.0979886	0.109846	0.898932	-0.940883	2.65495	0.02963
3883	RLP24	Q07915		1.64564	2.3978	0.0151525	1.75799	1.7253	0.037967	1.32521	1.74926	0.164148	0.678335	0.51255	0.471552
1571	ROT2	P38138		-1.32618	2.39483	0.0152363	-1.20423	1.20309	0.100588	-0.351559	1.50428	0.210746	-0.545613	0.742788	0.336782
323	TY2B-GR1;TY2B-GR2;TY2B-F;TY2B-LR1;TY2B-OR2;TY2B-C;TY2B-LR2;TY2B-OR1;TY2B-DR2	Q12337;P0CX64;P0CX63;P0C2J3;Q12501;P25384;P0C2J5;Q12113;Q03494		-1.51026	2.39327	0.015271	NaN	NaN	NaN	-0.837662	1.65104	0.178784	NaN	NaN	NaN
2329	RPL10	P41805		0.598325	2.39042	0.015351	0.113393	0.483386	0.398845	-0.0734816	0.211302	0.81198	-0.519244	3.04648	0.0208009
4218	UTP23	Q12339		2.13073	2.38863	0.0153941	1.03264	1.21576	0.0980047	-0.919054	1.08148	0.325615	NaN	NaN	NaN
2031	AST2	P39945		-1.84822	2.38137	0.0155917	-1.71333	1.25966	0.0900509	-0.0167565	0.0358822	0.970565	0.0979118	0.310398	0.642451
922	EHD3	P28817	TRUE	-1.67695	2.38153	0.0155917	-1.18694	2.34892	0.0126812	-0.241559	0.295706	0.745955	-0.598894	1.02562	0.229635
4036	PLP2	Q12017		1.70952	2.38184	0.0155917	0.981488	2.39615	0.0117522	0.342352	0.299002	0.743774	-0.437455	0.508195	0.473633
3941	SGT1	Q08446		-1.39831	2.38067	0.0155962	-0.0836267	0.11773	0.802474	-0.70893	2.38362	0.0819062	-0.544146	1.00984	0.235159
2575	LIA1	P47120		0.800439	2.37767	0.0156834	1.5804	4.24274	0.000766687	-0.076055	0.166012	0.853033	0.64929	2.84395	0.0249164
3933	RRP40	Q08285		-1.53873	2.37641	0.0156879	-1.65433	1.96732	0.0246852	-0.896703	2.40482	0.0800049	NaN	NaN	NaN
4148	RPL7B	Q12213		0.746687	2.37651	0.0156879	0.530623	3.08909	0.00391426	0.180457	0.397627	0.671028	0.243579	0.777132	0.324021
829	IMG1	P25626	TRUE	-1.35659	2.37567	0.0156942	-1.65824	1.89665	0.0277613	0.181014	0.177975	0.841002	-0.967884	1.16497	0.188871
322	RPS18B;RPS18A	P0CX56;P0CX55		0.837926	2.37189	0.0158105	1.06995	4.56172	0.000545002	0.131538	0.431485	0.642797	0.0649471	0.143124	0.813213
919	HEM3	P28789		-1.79775	2.37094	0.0158243	1.93567	1.93208	0.0262645	-1.12038	1.91457	0.137989	1.03267	1.54457	0.110947
1202	TIM23	P32897	TRUE	-0.76352	2.36872	0.0158847	-0.550229	2.23762	0.0154671	-0.365918	1.09776	0.320624	-0.414115	0.815157	0.307204
3282	NAN1	Q02931		1.06475	2.36614	0.0159585	-0.683356	1.50818	0.0567684	0.416897	0.688459	0.486905	-1.44266	3.59258	0.0128764
2382	CCT7	P42943		0.801715	2.36494	0.0159819	0.960869	2.49388	0.0100254	-0.0874028	0.184639	0.833862	-0.0926423	0.151104	0.801708
897	GAR1	P28007		1.68367	2.36266	0.016045	0.925166	3.25179	0.0030234	0.731148	1.50975	0.209776	0.0511117	0.10067	0.862886
3760	NOC4	Q06512		1.83078	2.35496	0.016311	0.147963	0.166392	0.731034	0.405627	0.44504	0.63356	NaN	NaN	NaN
1470	PAM17	P36147	TRUE	-0.838517	2.35333	0.0163511	-0.878618	2.37834	0.0120754	-0.0981936	0.303259	0.739974	-0.846683	2.18533	0.0474715
1928	UME6	P39001		3.37486	2.35186	0.0163854	NaN	NaN	NaN	5.09352	3.77279	0.0133725	NaN	NaN	NaN
340	MRP1	P10662	TRUE	-1.42799	2.35073	0.0164068	-2.20481	4.52692	0.000565789	-0.39535	0.636153	0.510597	-0.811183	2.37869	0.0392501
376	SUP45	P12385		0.828641	2.34796	0.0164801	0.986473	4.2186	0.000786766	0.140666	0.28374	0.756009	0.690154	4.77639	0.00322445
3898	RCL1	Q08096		0.907604	2.34767	0.0164801	0.692464	0.808316	0.213183	0.36997	1.38758	0.237839	0.170841	0.164971	0.788616
3532	MYO5	Q04439		-0.926018	2.34675	0.0164858	-0.892236	2.05696	0.0210452	-0.398202	1.17626	0.295457	-0.490337	1.44479	0.127232
1347	TAF14	P35189		0.816877	2.3464	0.0164858	1.09432	2.28428	0.0142228	0.726115	1.61573	0.184488	0.62117	1.66528	0.0950906
2209	PAN6	P40459		1.13956	2.3445	0.0165367	2.74446	4.82726	0.000419405	0.426149	0.916313	0.391413	2.06083	4.63942	0.00369372
1387	GPX1	P36014	TRUE	-2.70399	2.33723	0.0167943	NaN	NaN	NaN	-0.252948	0.121047	0.891784	NaN	NaN	NaN
1216	VAM7	P32912		-3.6945	2.33331	0.0169247	-0.809371	1.29454	0.0843033	-0.655177	0.331915	0.717994	0.433325	0.174436	0.777549
1745	PPX1	P38698	TRUE	1.58826	2.33276	0.0169247	0.81325	0.983015	0.152574	-0.0179291	0.00954048	0.991724	1.9411	1.68033	0.0928909
3378	TCB3	Q03640		-0.699478	2.33173	0.0169279	-0.574542	2.70134	0.00712002	-0.282723	2.18819	0.101365	-0.638105	2.98943	0.0213017
2030	UBP5	P39944		3.99117	2.33156	0.0169279	0.103201	0.0565509	0.899136	1.16827	0.588764	0.535477	-0.224901	0.0882104	0.879059
141	MET6	P05694		0.482063	2.32993	0.0169702	1.56977	3.32743	0.00268715	-0.252159	1.21445	0.28302	0.981538	3.03745	0.0209232
3839	NDE2	Q07500	TRUE	-3.82191	2.32837	0.0170094	-3.88448	1.61804	0.0463444	-0.851189	1.81185	0.156137	-0.996181	1.32217	0.149324
576	MRPL33	P20084	TRUE	-2.4699	2.32372	0.0171708	-1.21215	2.09773	0.0195663	-1.10305	0.789822	0.442825	-0.130972	0.0927067	0.873913
2439	DUG1	P43616	TRUE	-0.370751	2.32241	0.0172008	0.294664	1.10998	0.119723	0.0627899	0.249286	0.780748	0.350651	1.5087	0.116244
535	STE4	P18851		0.638323	2.31828	0.0173429	0.712259	0.689543	0.269439	-1.31237	1.87825	0.144681	0.29375	0.266267	0.683347
79	MES1	P00958		0.750448	2.31621	0.0173818	0.459374	1.00825	0.145339	-0.31676	1.9285	0.136446	-0.0385132	0.052038	0.927441
2102	NUP157	P40064		1.27432	2.31622	0.0173818	0.802405	0.246855	0.631772	1.96771	4.91156	0.00431778	1.16462	0.852864	0.290364
627	IDP1	P21954	TRUE	-0.797877	2.30853	0.0176696	-0.367331	2.07085	0.0205748	-0.0117254	0.0436475	0.964939	-0.225075	0.923451	0.264754
869	APL1	P27351		-2.17713	2.30473	0.0177677	-2.70044	3.00479	0.00445672	0.0343637	0.0316567	0.972505	-1.35093	1.72081	0.0884125
4296		Q12486	TRUE	-1.18175	2.30448	0.0177677	-1.87415	1.0243	0.140929	-1.28425	1.73013	0.167372	-1.62711	0.845525	0.293962
2502	RPL17B	P46990		0.755321	2.30497	0.0177677	0.890373	3.3385	0.00264924	0.132635	0.693897	0.485526	0.0330896	0.0681322	0.909111
3870	FRA1	Q07825		-1.13188	2.3019	0.017848	-0.990914	3.38027	0.00247463	-0.361064	0.661918	0.502521	-0.232163	0.609594	0.406786
4071	SPE3	Q12074		0.658983	2.30143	0.017848	1.74891	3.5632	0.00194332	0.26237	0.649042	0.508853	0.926369	2.45671	0.0360796
83	RAS1	P01119		4.25666	2.30015	0.0178782	1.85132	1.35715	0.0749093	0.387569	0.176556	0.842428	NaN	NaN	NaN
2523	ALY2	P47029		-3.88019	2.29508	0.0179723	-3.26997	3.78447	0.00142623	-0.605209	0.872275	0.407462	-0.402192	0.67293	0.373844
4141	NCR1	Q12200		-2.06907	2.29609	0.0179723	-0.443655	0.807617	0.213444	0.0965052	0.072951	0.935697	-0.282416	0.332492	0.621491
432	SAM35	P14693	TRUE	-1.35488	2.29461	0.0179723	-2.48491	2.96986	0.00469676	-0.538151	0.719224	0.472949	-2.38231	2.49826	0.0347892
3191	UBP2	Q01476		-1.19846	2.29592	0.0179723	-0.189866	0.34004	0.528149	-0.238791	0.444265	0.633781	0.00485134	0.00406967	0.994549
136	HEM2	P05373		-0.724489	2.29504	0.0179723	-0.499804	1.408	0.0684693	-0.11631	0.593557	0.532493	0.259243	0.489025	0.486403
49	TDH3	P00359	TRUE	0.578966	2.29616	0.0179723	1.20058	2.85918	0.00556644	0.339215	1.45469	0.22343	0.123437	0.22818	0.718566
2621	GCV1	P48015	TRUE	3.27569	2.2937	0.0179875	0.406177	1.72091	0.0382447	0.0466337	0.0200267	0.980927	0.761971	1.42241	0.131244
3296	ISU1	Q03020	TRUE	-1.1827	2.2915	0.0180552	0.0457792	0.0237932	0.955822	-0.21353	0.141886	0.878414	1.43195	1.03587	0.226251
2105	LSM4	P40070		1.3484	2.29099	0.0180552	0.892859	1.14677	0.111941	0.435227	1.11334	0.31613	0.228797	0.228524	0.718492
314	RPS8B;RPS8A	P0CX40;P0CX39		0.872625	2.29025	0.0180638	0.815846	2.81704	0.00593496	0.226148	0.517153	0.581195	0.0111399	0.0325851	0.954372
2640	DSK2	P48510		-0.86205	2.28848	0.0181149	0.233046	0.256155	0.621113	-1.1976	2.79691	0.0469227	0.0700212	0.0753296	0.897456
2580	AIM24	P47127	TRUE	-3.47148	2.28404	0.0182335	-2.25629	5.4942	0.000207321	-1.99287	1.3353	0.244123	-1.60516	5.40645	0.00201282
694	MRPL25	P23369	TRUE	-1.51907	2.28434	0.0182335	-4.41398	2.579	0.00866913	-0.113432	0.090914	0.916996	-1.03708	0.853173	0.290364
1035	MDH3	P32419		-1.16201	2.2835	0.0182335	-0.678672	1.92834	0.0264416	-0.0325899	0.0630729	0.945092	-0.455632	1.0851	0.211102
3711	JIP5	Q06214		3.02532	2.28471	0.0182335	1.37789	0.659937	0.285067	NaN	NaN	NaN	-1.16909	0.853244	0.290364
1826	UBA4	P38820		-1.24147	2.28127	0.0183048	-0.603684	2.76538	0.00648989	-0.142368	0.518557	0.58072	-0.202259	0.986908	0.242805
2291	GTT1	P40582		-1.33659	2.27917	0.0183711	-1.73057	3.33175	0.00266908	-0.204724	0.325244	0.72483	-0.235578	0.728556	0.344711
4193	BMT6	Q12291		2.30579	2.27556	0.0185018	-0.385039	0.350393	0.516882	NaN	NaN	NaN	-1.01421	0.769208	0.326383
3793	UTP4	Q06679		1.11781	2.27262	0.0186046	0.53161	0.635742	0.29899	0.19031	0.185531	0.833809	-0.352386	0.29892	0.65379
285	RPS25A;RPS25B	Q3E792;P0C0T4		0.818214	2.26917	0.0187302	1.52029	3.38617	0.00245536	-0.397509	0.887913	0.401788	0.390833	0.890247	0.278363
3284	RNY1	Q02933		-1.14247	2.26545	0.0188451	-1.69047	2.26515	0.0147429	0.212888	0.309308	0.737742	-0.110224	0.103991	0.859137
2294	ALA1	P40825	TRUE	0.536211	2.2657	0.0188451	1.34277	6.36939	0.000184285	-0.0357952	0.112554	0.898932	0.509072	3.4748	0.0143311
282	HEM1	P09950	TRUE	-1.42539	2.26474	0.0188529	0.538314	0.313686	0.556505	-0.740996	3.12312	0.0336268	NaN	NaN	NaN
1729	FKS1	P38631		0.953054	2.26359	0.0188797	0.159608	1.04518	0.135543	0.0340371	0.0528483	0.955668	-0.0654554	0.157463	0.795629
940	CAM1	P29547		-0.9964	2.25916	0.0190501	-0.223365	0.446617	0.429686	-0.0532703	0.0981825	0.908907	0.350034	0.712463	0.353023
154	TPK3	P05986		1.99056	2.25705	0.0191197	NaN	NaN	NaN	NaN	NaN	NaN	NaN	NaN	NaN
4418	ISN1	Q99312		-1.31069	2.25522	0.0191635	-0.412744	0.555078	0.34679	-0.201401	1.06202	0.333921	0.447688	0.768037	0.326653
1200	PRS1	P32895		0.838985	2.255	0.0191635	0.37936	2.02394	0.0224477	0.139969	0.284674	0.756009	-0.1337	0.264166	0.685994
4293	AIM45	Q12480	TRUE	-0.702964	2.25377	0.019173	-0.916854	1.6652	0.0425882	0.266392	0.692315	0.485664	-0.499068	0.878732	0.280969
4381	NOP10	Q6Q547		1.31276	2.25373	0.019173	1.53487	1.51201	0.0563573	-0.658712	1.14347	0.305794	0.543203	0.422374	0.541247
1030	ARP2	P32381	TRUE	-0.873787	2.25087	0.0192637	-0.391242	1.95861	0.025024	-0.238539	0.700006	0.482448	-0.0776348	0.2983	0.654227
2882	ENV11	P53246		3.82579	2.25063	0.0192637	0.951746	0.767039	0.23088	NaN	NaN	NaN	NaN	NaN	NaN
3668	STE23	Q06010	TRUE	-1.00728	2.24889	0.0193181	-0.475873	1.03698	0.137698	-0.356981	0.954066	0.377673	0.0178022	0.0251131	0.96481
1344	PTC1	P35182		-1.61813	2.24762	0.0193512	-0.194799	0.0735201	0.870696	-1.48774	2.0442	0.11806	0.643256	0.274122	0.677099
634	APA2	P22108		-1.37658	2.24478	0.0194313	-1.07636	1.26382	0.0893564	-0.571075	1.22245	0.282692	-0.0377507	0.0479556	0.933032
3654	SSQ1	Q05931	TRUE	-1.06966	2.24481	0.0194313	-1.98003	3.32451	0.00270092	-0.362541	0.641782	0.509676	-0.989873	2.74454	0.0277369
1382	MYO3	P36006		-2.42609	2.24178	0.0195194	-1.70562	2.52881	0.00940952	-0.395969	0.646402	0.508853	-0.312677	0.996552	0.240064
479	THR4	P16120		0.41368	2.24228	0.0195194	1.47249	4.44738	0.000604796	0.150233	0.529176	0.576097	1.06202	2.69777	0.0280683
547	ARF2	P19146		-0.524825	2.23813	0.0196561	-0.435732	2.5362	0.00930056	-0.141097	0.584215	0.536893	-0.379498	1.14945	0.193144
481	RPB3	P16370		0.577074	2.23771	0.0196561	-0.178477	0.305063	0.56601	0.502201	1.49915	0.211901	-0.441942	0.987374	0.242805
784	GRX1	P25373		-1.49206	2.23528	0.0197425	-0.435264	0.89968	0.179374	-0.145384	0.171593	0.847693	0.535379	0.802955	0.312697
2893	NOP7	P53261		0.889569	2.23414	0.0197709	1.00633	2.9269	0.00503611	-0.501767	0.807665	0.438775	-0.434957	0.946729	0.257043
2574	HAM1	P47119		0.90228	2.23282	0.0197864	2.25584	3.53591	0.00199722	-0.0355563	0.074153	0.93507	1.61632	2.6389	0.0297458
3366	RSN1	Q03516		1.75051	2.23277	0.0197864	-1.04779	1.99778	0.0233583	-0.28237	0.15883	0.86	-1.85086	2.94157	0.0218781
3970	HRK1	Q08732		-0.901474	2.23219	0.0197893	-1.44679	3.70486	0.00158835	-0.186288	0.396746	0.672035	-0.632522	1.02415	0.229997
1558	ADH5	P38113		-1.95451	2.23047	0.0198333	-5.33024	2.54264	0.00921868	4.29295	4.43701	0.00595027	0.611211	1.76737	0.0828456
439	CMP2	P14747		-1.34089	2.23019	0.0198333	-0.307441	1.04651	0.135223	-0.266808	0.452446	0.627632	-0.031734	0.052838	0.926363
3451	RSM24	Q03976	TRUE	-1.12874	2.22898	0.0198654	-2.89287	3.27039	0.0029415	0.517742	1.08286	0.325615	-1.73453	1.93938	0.0669783
466	NOP1	P15646		1.06185	2.22245	0.0201422	0.900654	2.62161	0.00809089	-0.14716	0.269273	0.767179	-0.442824	0.957495	0.252648
4328	DNF2	Q12675		-2.96587	2.22014	0.020202	-2.13869	3.88092	0.00126842	-2.41447	1.73156	0.167372	-2.00704	2.20791	0.0468047
2033	OXA1	P39952	TRUE	-1.35343	2.2204	0.020202	-1.47675	2.11361	0.019008	-1.11097	1.7613	0.162342	-0.848481	1.75296	0.0845743
3472	PPN1	Q04119		-1.81424	2.21863	0.0202483	-0.799899	0.961768	0.159108	-0.659068	0.710823	0.477336	0.215909	0.18673	0.763627
246	CAR2	P07991		-0.673942	2.21769	0.0202686	-0.266021	0.66582	0.281747	-0.382312	1.32915	0.245966	-0.111263	0.187248	0.763627
3510	MIX14	Q04341	TRUE	-2.19032	2.21456	0.0203909	-1.53088	1.46764	0.061252	-0.245722	0.558345	0.5526	-0.176535	0.269959	0.680525
876	ADE1	P27616		0.720858	2.21266	0.0204537	0.770957	2.35896	0.0124249	0.405728	0.924233	0.387894	0.957006	2.64194	0.0297458
1712		P38430		3.01134	2.21221	0.0204537	0.620478	0.485402	0.397269	NaN	NaN	NaN	NaN	NaN	NaN
1851	YAP1801	P38856		-2.38149	2.20889	0.0205862	-1.39188	1.18488	0.104284	-0.604216	0.434796	0.640722	0.149112	0.280936	0.670419
3252	PET191	Q02772	TRUE	-1.65441	2.20627	0.0206867	0.384644	0.319521	0.551016	0.319834	0.62296	0.517985	0.827171	0.655265	0.383628
1259	SLA2	P33338		-0.551881	2.19925	0.0209996	-0.165022	0.328571	0.541227	0.00135136	0.00395273	0.997865	0.204366	0.487963	0.487356
3491	ECM16	Q04217		2.16682	2.19806	0.0210324	0.228108	0.227968	0.654925	2.44203	1.13737	0.307238	-0.183712	0.120499	0.840108
3746	TPO3	Q06451		-1.73266	2.19372	0.021219	-1.753	2.40948	0.0115298	-0.41027	0.815547	0.434751	-0.543521	0.988224	0.242805
3796	UBX5	Q06682		-1.4781	2.19175	0.0212905	-0.0485268	0.0436927	0.922437	0.0386238	0.0600821	0.947038	1.22493	1.39036	0.136376
1527	ASC1	P38011		0.661146	2.18864	0.0214186	1.13768	3.82764	0.00135327	0.239701	1.12161	0.31277	0.111424	0.239563	0.709843
1941	STM1	P39015		0.744627	2.18771	0.0214202	0.714332	3.07072	0.00403215	0.0599899	0.149351	0.869457	-0.139747	0.459035	0.511706
3140	RPL22B	P56628		0.804481	2.1876	0.0214202	0.250965	0.172318	0.723744	-0.0334549	0.0752539	0.934337	-0.203575	0.276818	0.674768
3060	PGA2	P53903		2.01544	2.18643	0.0214531	4.08089	3.33555	0.00265466	0.100839	0.0736735	0.935428	1.02543	0.861988	0.287418
3752	YPR127W	Q06494		-1.57239	2.1843	0.0215334	-1.15851	1.75955	0.0355051	-0.0802579	0.0963379	0.911139	0.12892	0.239562	0.709843
683	RPS1B	P23248		1.0603	2.17866	0.0217899	1.57593	2.10918	0.0191445	-0.0167918	0.0191218	0.981955	0.260635	0.27177	0.679634
2587	BUD4	P47136		3.62234	2.1768	0.0218581	-0.034142	0.0178957	0.966969	NaN	NaN	NaN	NaN	NaN	NaN
1653	SHE3	P38272		1.05801	2.17514	0.0219163	0.0181489	0.0240278	0.955577	-0.0251036	0.0340777	0.971291	-0.38763	0.936426	0.26085
326	RPL35B;RPL35A	P0CX85;P0CX84		1.10317	2.17338	0.0219298	1.1135	3.21465	0.00320602	0.0352087	0.0484548	0.960176	0.147333	0.153257	0.799379
1913	ADE6	P38972		1.33725	2.17349	0.0219298	2.29191	3.99214	0.00106144	0.364834	0.524382	0.578107	1.19306	2.43261	0.0368703
2245	AIR1	P40507		2.27873	2.1739	0.0219298	NaN	NaN	NaN	NaN	NaN	NaN	NaN	NaN	NaN
629	MCK1	P21965		-0.723073	2.17227	0.0219606	-0.764259	2.46896	0.0104744	-0.322176	1.00235	0.359917	-0.286888	0.530819	0.458063
2994	TRM112	P53738		0.659142	2.17088	0.0220053	1.8296	3.99893	0.00105526	-0.270536	0.363455	0.692015	0.670682	1.74943	0.085
2380	SER2	P42941		2.26663	2.17029	0.0220101	NaN	NaN	NaN	-0.506844	0.475697	0.609624	2.37148	3.12985	0.018759
236	ARD1	P07347		0.966096	2.16965	0.0220175	0.259162	0.26907	0.60616	0.753457	1.50813	0.209776	-0.263815	0.382131	0.575342
1210	MNS1	P32906		-2.591	2.16788	0.0220823	-2.74993	3.24066	0.00306489	-1.22729	1.63232	0.182526	-0.233946	0.164708	0.788616
290	RPL31A	P0C2H8		0.653036	2.16723	0.0220899	0.753776	2.29446	0.01399	0.127272	0.373483	0.690049	0.0892487	0.193834	0.758457
2202	YIL161W	P40449		1.89482	2.16521	0.0221675	0.0290365	0.0120211	0.977046	0.42483	0.223492	0.803098	-1.26527	0.610246	0.406786
530	ATP10	P18496	TRUE	-2.86784	2.16461	0.0221732	-3.1423	2.79612	0.00615186	-0.0406065	0.0288336	0.975459	-0.817935	0.965455	0.249544
3586	COX20	Q04935	TRUE	-2.05546	2.16354	0.0221773	-2.31117	3.62352	0.001784	-0.503911	0.644633	0.508853	0.404476	0.370547	0.586141
2189		P40363		-0.93074	2.16386	0.0221773	-0.256732	0.233517	0.64782	-0.761806	1.4762	0.220023	0.955422	1.82068	0.0778094
2607	SGM1	P47166		-2.20552	2.16302	0.0221787	-2.09448	0.968964	0.157008	-2.35184	2.36931	0.0830542	0.91478	0.459505	0.511397
1838	ECM14	P38836		-1.39156	2.16233	0.0221886	-1.46155	2.26363	0.0147788	-0.848849	1.94499	0.135265	-0.3726	0.765755	0.327455
4157	ATP20	Q12233	TRUE	-1.36727	2.16104	0.0222297	-1.04013	3.20044	0.00327875	-0.141935	0.147403	0.870385	0.107803	0.38584	0.571737
926	BRF1	P29056		2.21617	2.1586	0.0223296	2.08902	1.43022	0.0658995	-0.17465	0.0966938	0.911046	NaN	NaN	NaN
1915	ASP1	P38986		1.29078	2.15441	0.0225205	2.56945	2.93701	0.00495041	0.0530119	0.0600145	0.947038	0.82937	0.769746	0.326182
489	APA1	P16550		0.738407	2.14976	0.0227374	0.714804	1.7452	0.0365989	-0.158335	0.645092	0.508853	0.808569	1.74226	0.0860086
226	PFY1	P07274		-1.13189	2.14876	0.022764	-0.240442	0.451408	0.426122	0.292842	0.457926	0.62326	0.210183	0.290779	0.65992
3281	ELP3	Q02908		1.11546	2.14826	0.0227643	-0.101009	0.249506	0.628716	0.430139	0.785223	0.443568	-0.54953	1.53122	0.113408
3353	PKH1	Q03407		-2.35065	2.14611	0.0228514	-1.86739	1.13881	0.113559	-1.01121	1.36487	0.23983	-0.623513	0.454498	0.514444
3529	HSP31	Q04432		-2.48449	2.14552	0.0228571	-0.263013	0.177666	0.717273	0.138161	0.117361	0.895722	0.61363	0.762084	0.328303
2249	MAM33	P40513	TRUE	-0.91648	2.14485	0.0228668	-1.32999	4.61048	0.000536833	0.173875	0.382174	0.682344	-0.623825	2.75847	0.0273958
3547	MRPL1	Q04599	TRUE	-1.71082	2.14393	0.0228706	-1.5613	4.39212	0.000650326	-0.657921	0.874651	0.406404	-1.45597	3.85024	0.00999141
72	ENO1	P00924	TRUE	-0.495512	2.1438	0.0228706	1.35933	2.013	0.0228379	-0.175496	0.498754	0.593811	0.940735	1.06342	0.216665
2150	SIP5	P40210		-1.7336	2.14325	0.022874	-1.15812	2.19242	0.0166022	0.181121	0.332597	0.717969	-0.0682425	0.127971	0.832656
463	TRM1	P15565	TRUE	0.908871	2.13247	0.0234229	1.09311	2.87587	0.00541785	-0.175592	0.419499	0.651021	0.0874119	0.126506	0.833973
2731	PYK2	P52489	TRUE	1.02548	2.13177	0.0234344	3.97849	6.13968	0.000190106	0.954538	1.71073	0.171884	2.64279	3.10925	0.0193082
1713	TIF5	P38431		0.712176	2.13046	0.0234786	0.677596	2.54786	0.00911984	0.190171	0.565726	0.547579	0.332729	0.883932	0.27942
1784	PIH1	P38768		-0.978181	2.12891	0.0235365	-0.476691	0.935331	0.167375	-0.43716	1.24885	0.273712	-0.0454907	0.0679944	0.909111
1276	SOF1	P33750		1.93232	2.12688	0.0236203	1.39832	3.17365	0.00342232	-0.334503	0.291396	0.751299	-1.29129	1.87822	0.0726351
1889	TIF11	P38912		0.835785	2.12597	0.0236439	0.994557	2.33124	0.0130667	0.225551	0.456466	0.624302	0.657119	1.68492	0.0923138
118	AAC1	P04710	TRUE	-1.21608	2.12303	0.0237777	-0.372998	0.425877	0.44708	-0.256081	0.347268	0.705407	-0.162291	0.160577	0.792923
4024	LAP2	Q10740		-1.12701	2.12198	0.0238093	-0.458203	1.07045	0.129048	-0.234872	0.33333	0.717754	0.300891	1.66455	0.0950906
1262	PGM1	P33401		0.993404	2.11645	0.0240813	1.07853	2.28691	0.0141696	0.122305	0.159017	0.859966	0.335848	0.544859	0.450441
2007	RBG1	P39729		2.03363	2.11608	0.0240813	2.01876	2.33784	0.0129214	1.32318	1.34922	0.240539	0.387625	0.88944	0.278363
1300	PIN4	P34217		-1.06293	2.11515	0.0241061	-0.620551	1.38368	0.0715732	-0.269457	0.450713	0.62861	0.0246124	0.0509291	0.928866
1618	OLA1	P38219		0.46524	2.11425	0.0241294	0.471478	2.08186	0.0201282	-0.0267782	0.128325	0.88819	0.1223	0.334282	0.620264
2428	YFR016C	P43597		-0.858169	2.11192	0.0242326	-0.369896	0.876545	0.187463	-0.0616035	0.0929472	0.914853	0.0542517	0.111542	0.849659
3731	ESF1	Q06344		1.01571	2.11132	0.0242394	1.52554	3.13406	0.00366483	-0.0318885	0.0485262	0.960176	0.374713	0.684086	0.367515
448	CYC8	P14922		-0.67324	2.10994	0.0242902	-0.233999	1.00921	0.14512	-0.189668	0.801158	0.441518	-0.047153	0.0604249	0.918699
1728	RFC1	P38630		-0.524479	2.10884	0.0243004	-0.12875	0.142903	0.762924	-0.0870695	0.155936	0.862377	-0.622272	0.872172	0.283842
337	ERG11	P10614		1.18152	2.1088	0.0243004	0.756586	1.90563	0.027378	0.059207	0.0615717	0.94633	-0.558945	1.20914	0.177639
2642	MSE1	P48525	TRUE	2.38117	2.10671	0.0243906	NaN	NaN	NaN	NaN	NaN	NaN	NaN	NaN	NaN
203	ADE5,7	P07244		0.313678	2.10569	0.0244214	2.01552	4.33124	0.000707822	0.0451078	0.109526	0.898932	1.16618	2.18413	0.0474715
520	RPC31	P17890		1.22522	2.10477	0.0244463	1.63734	1.4667	0.0613402	0.621781	0.768715	0.451454	0.548141	0.366429	0.590407
4145	NCE102	Q12207		-1.69543	2.10329	0.0244694	-2.21975	4.72984	0.000471764	-0.163673	0.112449	0.898932	-1.25968	3.15872	0.0185481
1393	SIS2	P36024		-1.22686	2.10294	0.0244694	-0.555436	0.847517	0.197601	-0.300983	0.421132	0.650115	-1.02959	0.892388	0.277605
4243	DBP10	Q12389		1.6571	2.10363	0.0244694	1.32943	3.78318	0.00142623	0.167155	0.185036	0.833809	0.145545	0.449072	0.518866
1657	APD1	P38281		-2.64225	2.10108	0.0245475	-0.510464	0.491581	0.39212	-0.667419	0.764724	0.45297	-0.135362	0.23548	0.712013
3700	PEX30	Q06169		-1.58503	2.10018	0.0245547	-0.914481	2.13076	0.018438	0.00253344	0.00273359	0.998258	-0.404011	0.858295	0.288484
545	FAS2	P19097		-0.299585	2.10001	0.0245547	0.623569	3.17407	0.00342232	-0.0783939	0.818659	0.434681	0.566941	2.76331	0.0273958
2987	ALG12	P53730		-1.19235	2.0959	0.024732	-1.52972	1.9139	0.0270456	-1.1578	2.81145	0.0466039	-0.940232	1.75124	0.0847789
1437	PAN3	P36102		-1.00333	2.09585	0.024732	-1.71609	1.34546	0.0765132	-1.28911	2.76262	0.0472047	0.457052	0.192652	0.758814
2781	NIF3	P53081	TRUE	0.358057	2.09547	0.024732	0.546013	2.17949	0.0170299	0.409759	2.03574	0.119504	-0.164302	0.376439	0.581099
2730	UBA2	P52488		1.07143	2.094	0.0247887	0.335838	0.51983	0.371559	0.639574	1.24236	0.276142	0.385687	0.768464	0.326535
1655		P38276		-1.47881	2.09343	0.0247949	-3.00032	2.30505	0.0137063	-0.185579	0.192656	0.827938	-1.88313	1.35713	0.141968
1289	NIC96	P34077		-1.01038	2.09288	0.0247994	-0.792208	2.93407	0.00497746	-0.385251	0.748239	0.459624	-0.912473	2.83331	0.0253136
1891	SPT8	P38915		-1.92113	2.09015	0.0249287	-0.0543942	0.0554827	0.901091	-0.505391	0.329205	0.721086	NaN	NaN	NaN
1802	RRP4	P38792		0.903965	2.08942	0.0249438	0.556711	1.23739	0.0939671	-0.0159316	0.0235198	0.978546	-0.353723	0.678566	0.370507
3052	CBK1	P53894		-1.89393	2.08839	0.024976	-3.09569	3.04498	0.0041879	-0.411628	0.266263	0.767922	-1.83307	2.11002	0.0524109
4354	YGR169C-A	Q3E772		-1.74125	2.08602	0.0250859	-1.81168	2.20361	0.0164064	-1.73662	1.57385	0.195308	-1.34158	3.04977	0.0208
1278	SEC66	P33754		1.14006	2.08477	0.025131	-0.4112	0.590329	0.324177	1.52645	2.95347	0.0425122	-0.665553	0.531344	0.457856
4360	YLR361C-A	Q3E795		-2.36979	2.07519	0.0256362	-0.14334	0.109965	0.813582	-0.724477	0.671466	0.497453	0.510379	0.791208	0.317338
2827	YGL082W	P53155		-1.38922	2.0753	0.0256362	-0.503035	0.465962	0.413619	-0.312357	0.825321	0.432837	0.171176	0.113777	0.848111
1888	FPR3	P38911		-0.253672	2.07288	0.0257454	-0.341327	1.05636	0.132762	-0.640011	1.83	0.152608	-0.553139	1.57462	0.106075
3121	ALO1	P54783	TRUE	-1.06571	2.07016	0.025827	-0.670599	1.76913	0.0348962	-0.550594	2.10135	0.109616	-0.257982	0.557399	0.441574
3108		P53981		-0.567044	2.07039	0.025827	-0.1969	0.928336	0.169823	-0.463897	0.731324	0.4678	-0.568346	2.46915	0.0358186
2432	LSB3	P43603		-0.456955	2.07012	0.025827	-0.388158	1.17652	0.106026	-0.0779309	0.25817	0.773728	0.284685	2.07891	0.0550958
1355	THI80	P35202		2.38517	2.06669	0.0260035	1.80041	0.765606	0.231555	NaN	NaN	NaN	NaN	NaN	NaN
3611		Q05506		0.436948	2.06455	0.0261045	0.808049	4.28748	0.000728977	-0.0186539	0.0844649	0.92445	0.692053	2.11978	0.0518143
211	COX9	P07255	TRUE	-1.27414	2.06219	0.0262189	-1.96202	3.29652	0.00283083	-0.391516	1.11842	0.314664	-0.426827	0.636162	0.39316
1839	NSG1	P38837		2.03246	2.06014	0.0262925	1.3142	2.46887	0.0104744	0.326509	0.266868	0.767922	0.281729	0.164741	0.788616
1620	RKM3	P38222		2.68449	2.06005	0.0262925	NaN	NaN	NaN	2.41201	1.88528	0.143847	4.10718	1.96174	0.0651659
3075		P53925		-3.12191	2.05603	0.0265089	-1.77678	4.10432	0.000900759	-0.582093	2.0187	0.120973	-0.219807	0.547735	0.448592
222	PEP4	P07267		-0.687483	2.05334	0.026617	-0.296191	2.70417	0.00710679	0.295242	0.887611	0.401788	0.257767	1.25461	0.165755
864	RPL16B	P26785		0.782643	2.05377	0.026617	1.12019	2.43224	0.0111168	0.0867157	0.170158	0.848561	0.439902	0.957997	0.252544
2511	SFH5	P47008	TRUE	-1.85876	2.05247	0.0266244	-1.11662	3.16524	0.00346393	-0.638712	1.21367	0.28302	-1.09025	2.48458	0.0352748
971	CCR4	P31384		-0.819134	2.0523	0.0266244	-0.668543	2.59032	0.00850906	-0.153718	0.495184	0.595897	-0.111014	0.860092	0.288211
1242	MDL2	P33311	TRUE	-3.12047	2.0503	0.026698	-2.43705	2.81011	0.006008	-0.900011	1.04602	0.341473	-0.972612	2.99574	0.0213017
2993		P53736	TRUE	-1.24529	2.04966	0.026698	-1.21897	2.81918	0.00592254	0.0484867	0.11947	0.893114	-0.330361	0.940764	0.259291
2153	NDE1	P40215	TRUE	-0.847083	2.04962	0.026698	-1.05652	3.98105	0.00107731	0.313382	0.811978	0.437159	-0.593735	2.38075	0.039184
2728	YML6	P51998	TRUE	-0.743683	2.04927	0.026698	-2.33607	3.49445	0.00207959	0.559841	1.52616	0.206284	-1.22216	1.89816	0.0706474
1473	YKR070W	P36151	TRUE	-0.981779	2.04736	0.0267874	-1.48755	1.9762	0.0243105	-0.424938	0.980587	0.366502	-0.667509	2.71106	0.0280515
3914	AIM39	Q08223	TRUE	-2.26446	2.04615	0.0268343	-1.93326	3.10682	0.00380602	-1.07191	0.86278	0.411343	-0.158829	0.10033	0.863257
1123	RTG1	P32607		-1.08309	2.04536	0.0268549	NaN	NaN	NaN	-0.779195	0.619875	0.518506	NaN	NaN	NaN
4333	YPK9	Q12697		3.37368	2.03977	0.0271743	1.6957	1.51001	0.0565884	2.56739	1.01071	0.356249	1.30328	1.31581	0.150778
1219	SEC61	P32915		-1.7583	2.03868	0.0272141	-2.63375	2.70851	0.00707456	-0.534605	0.632798	0.511676	-0.617177	1.0952	0.20919
4194	ATG34	Q12292		-2.25881	2.03642	0.0273274	-2.68767	1.67565	0.0416674	0.338581	0.341756	0.710815	-0.509741	0.402399	0.557252
666	SAN1	P22470		1.45054	2.03559	0.0273513	0.513742	0.48111	0.400633	0.0357652	0.026066	0.978546	0.510049	0.439753	0.525636
898	PPA2	P28239	TRUE	-2.08237	2.03458	0.0273861	-1.65618	1.95491	0.0251737	-0.473777	0.90761	0.393559	-0.667166	0.982569	0.243733
785	NFS1	P25374	TRUE	-1.21811	2.0321	0.0274569	-1.10088	2.89044	0.00529977	-0.326796	0.522358	0.578107	-0.756802	2.23476	0.0459541
1026	MVD1	P32377		0.579782	2.03275	0.0274569	1.852	3.7001	0.00159408	0.0205655	0.0579733	0.948835	1.18807	2.21941	0.0461879
701	HXT2	P23585		2.78464	2.03243	0.0274569	0.830213	1.14204	0.112868	0.806084	0.463101	0.619373	2.46067	3.01176	0.0212535
3664	BNA5	Q05979		-1.10766	2.03116	0.0274881	-0.374688	0.733872	0.24649	1.03023	1.78022	0.160313	-0.438264	1.03731	0.226043
4319	DCP1	Q12517		-0.973938	2.027	0.0276949	-0.747748	1.92868	0.0264377	-1.11112	2.53042	0.0658185	-0.523933	1.0672	0.215576
4289	TCB1	Q12466		-0.749261	2.02728	0.0276949	-0.603006	0.589309	0.324824	-0.148475	0.637947	0.509721	-0.433245	1.0464	0.222964
4093	MRH1	Q12117		-0.940255	2.0191	0.0281188	-0.848669	2.17019	0.0171992	-0.155868	0.303527	0.739864	-0.328345	0.758759	0.329433
3042	RHO5	P53879		-0.872075	2.01819	0.0281188	-0.252141	0.367993	0.5004	-0.162614	0.389448	0.677382	0.0676236	0.0835036	0.886091
54	COX6	P00427	TRUE	-0.735946	2.0184	0.0281188	-0.624922	1.99311	0.02355	0.505277	2.86438	0.0437341	0.349545	0.946464	0.257043
924	CTS1	P29029		-0.574759	2.01939	0.0281188	-0.275914	1.07113	0.128914	-0.600507	2.62041	0.057993	-0.474561	1.40494	0.13406
3957	ABP140	Q08641		0.551147	2.01816	0.0281188	1.1616	3.16468	0.00346393	0.00639677	0.0140372	0.9847	0.328326	0.278245	0.673485
815	SPB1	P25582		1.20711	2.01606	0.0281967	0.231246	0.491611	0.39212	-0.231205	0.297263	0.744471	-0.33775	0.416808	0.546775
3512	BUD22	Q04347		1.86267	2.01618	0.0281967	0.00712776	0.00883355	0.982904	0.56932	0.437807	0.638782	NaN	NaN	NaN
383	MRP13	P12686	TRUE	-1.01019	2.01544	0.0282085	-1.93715	2.41373	0.0114557	0.156157	0.304896	0.738674	-0.752863	1.68052	0.0928909
3374	LIP1	Q03579		-1.04353	2.01493	0.0282128	-2.35044	2.93991	0.00494071	-0.512999	1.42054	0.234926	NaN	NaN	NaN
3612	SVF1	Q05515		1.2728	2.0142	0.0282311	0.569738	0.767976	0.230557	0.0581188	0.0561639	0.950674	-0.748456	1.85771	0.0749373
3715	SEC10	Q06245		-2.53693	2.01295	0.0282832	-2.40303	1.13908	0.113539	0.701467	0.526851	0.576453	-1.01132	0.575117	0.429029
2012	SEC72	P39742		1.51221	2.01234	0.0282941	-0.286121	0.768088	0.230557	0.578549	0.821886	0.433964	-1.30275	1.24849	0.167388
685	TKL1	P23254		0.431419	2.01083	0.0283637	1.04307	4.28521	0.000728977	-0.154493	0.562613	0.549267	0.402414	1.61451	0.100268
53	COX5A	P00424	TRUE	-0.910447	2.00607	0.0286467	-0.904291	1.18751	0.103818	-0.142468	0.246003	0.783925	0.0974159	0.214093	0.732927
1340	RRP1	P35178		1.76445	2.00502	0.0286868	2.45162	2.86546	0.00551421	0.971348	1.00989	0.356249	1.64188	2.07144	0.0559315
2939	YGR266W	P53326		-0.904878	2.00324	0.0287756	-1.49331	5.82305	0.000190106	-0.462407	2.18773	0.101365	-1.01177	2.89599	0.0235673
3387	ESC1	Q03661		-1.73279	1.9999	0.028883	-0.867467	1.41598	0.0675547	-0.664405	1.00153	0.360189	-0.286464	0.49445	0.482479
745	ERG6	P25087		-0.424555	2.00101	0.028883	-0.0950537	0.567574	0.33885	-0.071291	0.226292	0.800442	0.245717	2.10437	0.05275
2999	ESF2	P53743		1.01603	1.99988	0.028883	-0.00384521	0.00441725	0.991435	-1.68517	1.97491	0.130682	-0.995961	0.809841	0.309776
590	MAK11	P20484		1.39435	1.99985	0.028883	-0.0826468	0.168497	0.728817	-0.608265	0.938119	0.384784	-0.956239	1.07848	0.212634
2065	YER010C	P40011		-1.11111	1.99434	0.029222	-0.774572	0.662188	0.283801	-0.0776849	0.122568	0.890652	1.23362	1.38347	0.137509
163	ILV5	P06168	TRUE	-0.257146	1.99321	0.0292685	-0.134487	0.706533	0.26063	0.239305	2.34541	0.0846763	-0.0622339	0.327286	0.626539
2751	CWH41	P53008		-1.96908	1.99277	0.0292687	-0.658052	1.367	0.0736315	-1.12966	1.36452	0.23983	-0.408382	0.812911	0.308596
293	TY1B-PR1	P0C2I9		0.508199	1.99187	0.0292996	3.91374	3.23882	0.0030733	-0.235966	0.771902	0.450412	0.845707	0.563906	0.436363
3375	YML079W	Q03629		-1.53525	1.98913	0.0294518	-2.76113	1.18741	0.103818	-0.191469	0.401915	0.669035	-0.533529	0.204169	0.746376
464	FRS1	P15624		0.442259	1.98874	0.0294518	0.816651	3.27649	0.00291849	0.0357542	0.109722	0.898932	0.57241	3.20546	0.0180987
1881	BAT1	P38891	TRUE	0.544104	1.98674	0.029558	0.0383615	0.150308	0.75216	0.372787	1.27862	0.263239	0.0404034	0.245187	0.703691
1208	MRPL6	P32904	TRUE	-2.24426	1.98343	0.0297542	-3.53282	1.38373	0.0715732	-0.482912	0.307914	0.737819	-1.49475	1.80807	0.0791741
491	HEM15	P16622	TRUE	-0.485389	1.97714	0.0301579	-0.909031	2.5747	0.0087272	0.301438	1.2251	0.282608	-0.382617	1.1866	0.182892
4168	RPN5	Q12250		-0.674708	1.97315	0.0304056	-0.541291	1.59384	0.0485794	-0.352883	0.3864	0.678555	-0.44971	0.892545	0.277605
2261	TED1	P40533		-1.20011	1.97124	0.0304788	-1.09599	3.52779	0.00201096	-0.350003	0.519305	0.580422	-0.28809	0.520555	0.464982
3541	UTP14	Q04500		3.03498	1.97162	0.0304788	2.34907	4.6693	0.000497983	0.691245	0.349266	0.703763	1.35424	2.16625	0.0486486
1039	ARO4	P32449		-0.441225	1.96774	0.0306943	0.566254	4.3225	0.000709178	-0.255465	1.15597	0.301067	-0.0931358	0.482856	0.491207
3290	PEX25	Q02969		2.84559	1.96662	0.0307427	NaN	NaN	NaN	1.85832	1.24896	0.273712	NaN	NaN	NaN
108	COX8	P04039	TRUE	-0.879097	1.96475	0.0307663	-1.04623	1.89688	0.0277613	-0.423492	0.80678	0.439279	-0.469282	1.07835	0.212634
2656	RBL2	P48606		-0.308552	1.96457	0.0307663	0.193676	0.607723	0.314349	-0.679228	4.9755	0.00431778	-0.504658	0.406883	0.553186
2875	YGR054W	P53235		0.738401	1.96455	0.0307663	0.419479	2.45113	0.0107482	0.103364	0.261383	0.771096	0.00702	0.0148059	0.97864
149	RPL22A	P05749		0.868633	1.96509	0.0307663	0.993927	1.9325	0.0262559	0.437033	1.36639	0.239652	0.198023	0.376843	0.580821
342	RPL4A	P10664		0.37834	1.96193	0.030922	0.78722	2.37689	0.0120771	-0.192426	0.746366	0.460427	0.213457	0.768823	0.326469
575	FPR1	P20081		-1.06388	1.96136	0.0309315	-0.348298	0.778574	0.226375	0.21619	0.754154	0.455795	-0.00580931	0.00713209	0.991115
2391	BRE2	P43132		-1.57937	1.95883	0.0310811	-0.840164	0.767663	0.230636	-0.630477	0.761026	0.454038	0.332531	0.263897	0.686138
697	MRS4	P23500	TRUE	3.14886	1.95687	0.0311912	NaN	NaN	NaN	NaN	NaN	NaN	NaN	NaN	NaN
604	CCA1	P21269	TRUE	0.740427	1.95533	0.0312705	-0.0797181	0.190531	0.701661	-0.230453	0.439656	0.637449	-0.385168	0.531734	0.457793
2606	XPT1	P47165		-0.894815	1.95387	0.0313447	-0.168258	0.219027	0.664825	-0.124538	0.173558	0.846555	0.858639	1.29974	0.155183
1088	ZUO1	P32527		0.383785	1.9519	0.0314564	0.667338	3.72424	0.00154388	-0.131716	0.639241	0.509721	0.294671	1.84499	0.0759238
138	OPI3	P05375		-1.48717	1.95062	0.0314871	-2.88934	2.09176	0.0197933	0.685778	0.506323	0.588767	NaN	NaN	NaN
961	HOM6	P31116		0.313389	1.95099	0.0314871	0.903691	3.41298	0.00237846	0.237682	1.23	0.280274	0.58292	2.74432	0.0277369
319	RPL18B;RPL18A	P0CX50;P0CX49		0.514216	1.94973	0.0315203	0.976113	4.43245	0.000617127	-0.291026	0.913863	0.392354	0.314049	1.59136	0.103536
2723	SHE4	P51534		-2.54859	1.94766	0.0316082	-1.72765	2.91999	0.00509868	-1.01696	1.12964	0.310151	-0.368194	0.867364	0.285498
2665	GCV2	P49095	TRUE	2.88425	1.94777	0.0316082	-0.132305	0.223995	0.658898	1.11861	0.668707	0.498637	-0.51141	2.16949	0.0486486
558	PMA2	P19657		-3.06299	1.94626	0.0316267	-6.82688	7.38095	4.93322e-05	-0.581071	0.314065	0.733143	-4.15193	3.56384	0.0128855
51	COX1	P00401	TRUE	-1.38422	1.94613	0.0316267	-2.79799	1.63791	0.0447556	-0.159395	0.327413	0.722665	-0.757412	1.72053	0.0884125
2990	RSM19	P53733	TRUE	-1.09594	1.94649	0.0316267	-1.63764	1.54143	0.0533527	-0.276477	0.505385	0.589075	0.134808	0.122593	0.838179
1092	RPD3	P32561		-1.08289	1.94278	0.0318088	-1.37788	3.80679	0.00137075	-0.324675	0.983527	0.366245	-0.567525	1.22224	0.173634
3215	MAK10	Q02197		2.09764	1.9431	0.0318088	-0.739424	0.239178	0.64095	2.49428	2.11991	0.106679	0.531851	0.259843	0.689469
959	SNC1	P31109		-2.91908	1.93906	0.0320508	0.869548	0.606955	0.314671	NaN	NaN	NaN	NaN	NaN	NaN
1203	CYM1	P32898	TRUE	-2.49503	1.9362	0.0322316	-0.344098	0.706234	0.26063	-1.54224	1.70078	0.173345	0.556122	1.05425	0.21968
4415	DET1	Q99288		-0.961279	1.93525	0.0322702	-0.399273	1.07914	0.126939	-1.15024	2.37424	0.0830542	-0.465641	1.09962	0.207798
862	RPS5	P26783		0.377275	1.9348	0.0322724	0.867686	4.34284	0.00070556	-0.279965	1.39521	0.236409	0.255255	1.17512	0.186516
3388	MIX17	Q03667	TRUE	-1.50043	1.93336	0.0323478	-1.23039	1.70565	0.0393449	0.482018	0.812846	0.436692	-0.216376	0.225117	0.719578
3412	TAF12	Q03761		0.46288	1.93237	0.0323899	-0.109245	0.295465	0.576069	0.138041	0.45049	0.62861	-0.583326	3.34023	0.0163562
2293	RLP7	P40693		1.24269	1.9318	0.032401	NaN	NaN	NaN	-0.379079	0.432944	0.641298	2.20403	1.2322	0.17147
1701	UBX7	P38349		-0.896323	1.92708	0.0327236	-0.817849	1.0622	0.131312	-0.487737	1.09712	0.320624	0.184342	0.316692	0.63678
1032	MRP20	P32387	TRUE	-1.46833	1.92654	0.0327322	-1.44627	1.94284	0.025719	0.330876	0.450763	0.62861	-0.2979	0.245575	0.703691
325	RPL19B;RPL19A	P0CX83;P0CX82		0.553567	1.92541	0.0327859	0.922031	3.37419	0.00249702	-0.185654	0.610824	0.522305	0.0609579	0.109966	0.851229
3254	SHR3	Q02774		-0.849492	1.9236	0.0328904	0.0882659	0.0268042	0.950567	-0.34083	0.602149	0.527171	-0.159372	0.0494881	0.931321
187	RHO2	P06781		-1.23314	1.92246	0.0329426	-1.01645	0.852583	0.195691	0.0114145	0.00882263	0.993011	-0.395188	0.183091	0.768588
205	ADH3	P07246	TRUE	-0.506715	1.92207	0.0329426	-0.699409	3.25526	0.00300414	0.265307	0.798187	0.441518	-0.31367	2.01272	0.0606517
1999	FLC2	P39719		-1.87342	1.92061	0.0330217	-0.661643	1.95105	0.0253341	-0.516721	0.577118	0.540441	-1.08652	2.24953	0.045222
2418	LOC1	P43586		1.19378	1.91978	0.0330527	0.855488	2.76189	0.00650667	0.190458	0.220374	0.807305	-0.124825	0.765123	0.327455
4235	HIF1	Q12373		-0.5309	1.91821	0.0331409	-0.267741	0.087275	0.848471	-0.673294	1.69065	0.173365	-0.184778	0.0545372	0.924631
2197	ATM1	P40416	TRUE	-2.16275	1.91769	0.0331483	-1.24556	1.49625	0.057962	-1.68249	1.10734	0.318638	-0.680787	0.838919	0.296846
881	COQ8	P27697	TRUE	-2.16175	1.91668	0.0331934	-1.96779	1.16592	0.10792	-0.486707	0.305179	0.738674	-2.08594	1.57965	0.105169
4242	MDM20	Q12387		-1.10276	1.91625	0.0331941	-0.844057	0.394507	0.475628	1.43288	3.67809	0.0154704	-0.267032	0.731975	0.342784
2303	GTS1	P40956		-0.914465	1.9134	0.0333808	-1.13126	3.52948	0.00201096	0.0666866	0.119165	0.893114	-0.542836	1.74162	0.0860086
357	HEM13	P11353		0.703745	1.91283	0.0333924	-0.295496	0.520728	0.37092	0.1319	0.214325	0.810223	0.937814	2.87853	0.0240984
1704	SSH1	P38353		-1.4017	1.91059	0.033533	-1.14184	3.46399	0.00219461	-1.61897	0.972874	0.371211	-1.61065	4.48271	0.00440523
225	DST1	P07273		0.723059	1.90707	0.0337735	-0.103912	0.179214	0.715372	0.682611	2.25602	0.0950312	-0.620172	1.40772	0.133778
370	MAS2	P11914	TRUE	-1.84805	1.90583	0.0338048	-1.22813	2.80142	0.00610937	-0.206088	0.127091	0.888711	0.000522614	0.000614232	0.999236
47	ADH2	P00331		-0.530927	1.90603	0.0338048	0.175805	0.729402	0.24876	-0.0379534	0.0867361	0.921587	0.707622	3.45386	0.0146326
260	ARO1	P08566		-0.486638	1.90475	0.0338567	-0.421679	1.33471	0.0779843	-0.271024	2.76898	0.0469227	-0.598083	1.56912	0.107011
1958	YCF1	P39109		-2.14757	1.90369	0.0339071	-0.0455413	0.0526261	0.906255	-1.58345	1.38518	0.238285	-0.53707	1.29406	0.15644
2538	RTT101	P47050		-1.76163	1.90275	0.0339485	-3.48605	3.69377	0.00160396	-1.54706	1.65437	0.177864	NaN	NaN	NaN
3721	SKG3	Q06315		-1.61921	1.89907	0.0341615	-1.76917	1.18662	0.103961	-0.148835	0.155331	0.863243	-1.19963	0.579699	0.426089
362	NHP6A	P11632		-1.1249	1.89838	0.0341615	-0.33287	0.208622	0.678845	-0.434997	0.904908	0.39499	NaN	NaN	NaN
2038	BEM2	P39960		-0.753761	1.89853	0.0341615	-0.74166	1.54616	0.0528572	-0.270375	0.753029	0.45586	-0.350576	0.839642	0.296554
1362	MRP8	P35719		-0.438675	1.89877	0.0341615	0.309373	1.55263	0.052192	0.141716	0.490166	0.600703	0.56303	2.11412	0.0520329
21	CET1	O13297		-0.853944	1.89625	0.0342966	-1.77202	2.60366	0.00834491	-0.734849	1.7736	0.160967	-1.14046	1.69633	0.0912375
621	MRPS28	P21771	TRUE	-2.13168	1.89541	0.0342976	-0.956516	1.34082	0.0771514	-1.05297	1.17389	0.296577	-0.159402	0.162993	0.790552
3279	NOG1	Q02892		1.50169	1.89565	0.0342976	0.673262	1.91	0.027188	-0.600878	0.442839	0.634901	-0.964201	3.29205	0.0165101
2255	RPL34A;RPL34B	P87262;P40525		1.1729	1.89182	0.0345495	0.673285	1.3491	0.0760188	0.148252	0.174853	0.844706	-0.0189123	0.0434381	0.938659
1651	AIM3	P38266		-1.50438	1.88931	0.034717	-1.2573	1.55489	0.0521043	0.0093894	0.0138543	0.984756	0.118957	0.159211	0.793316
1946	CCT4	P39078		0.613319	1.88808	0.034783	0.433221	1.26313	0.0894286	-0.213609	0.96622	0.372436	-0.190234	0.656672	0.382662
4221	GYP5	Q12344		-1.29123	1.88567	0.0349434	0.170704	0.343508	0.52446	-0.426795	0.665976	0.500537	0.37225	0.681201	0.3689
2841	TYW3	P53177		2.35616	1.88509	0.0349573	NaN	NaN	NaN	NaN	NaN	NaN	NaN	NaN	NaN
71	TRP2	P00899		0.382897	1.88425	0.0349586	0.125265	0.478281	0.402874	-0.00949383	0.0256865	0.978546	0.206787	0.817459	0.306179
1451	DBP7	P36120		1.30607	1.88438	0.0349586	0.287599	0.173298	0.722331	-0.634976	0.798925	0.441518	-0.866154	0.554495	0.443618
3302	MET31	Q03081		3.77411	1.88336	0.0349978	NaN	NaN	NaN	4.38363	3.06463	0.0359428	4.69809	5.97454	0.00163245
2121	PEA2	P40091		2.9262	1.8828	0.0350094	0.226396	0.0964912	0.835282	NaN	NaN	NaN	NaN	NaN	NaN
412	ENA1	P13587		-1.03484	1.88228	0.0350189	-0.344757	1.15834	0.109383	-1.26963	1.85	0.149758	0.125257	0.387938	0.570269
2217	RRT14	P40470		2.61639	1.87988	0.0351801	NaN	NaN	NaN	2.24204	2.24344	0.0972975	NaN	NaN	NaN
148	RPL15A	P05748		0.625944	1.87785	0.0352787	0.840511	2.84549	0.00565513	0.0457039	0.14085	0.879338	0.626882	1.56919	0.107011
3575	GFD1	Q04839		1.58514	1.87811	0.0352787	NaN	NaN	NaN	0.217672	0.159696	0.859398	NaN	NaN	NaN
3659	UTP13	Q05946		0.587743	1.87674	0.0353353	0.633638	1.3469	0.0763314	-0.676696	1.38147	0.239046	-0.453895	0.936077	0.26085
3239	NUP116	Q02630		-1.18324	1.8744	0.0354929	-0.720994	1.83354	0.0309974	0.278881	0.374573	0.688674	-0.716343	0.989901	0.242346
468	BGL2	P15703		-0.466555	1.87396	0.0354957	-0.345208	1.42445	0.0664486	-0.0420322	0.117812	0.895124	-0.00943375	0.0244303	0.966007
2395	SWP82	P43554		-1.09338	1.87307	0.0355354	-1.50019	0.846751	0.197824	-0.186452	0.158289	0.860064	-0.273231	0.108469	0.852091
688	CNA1	P23287		-1.70374	1.87223	0.0355381	-1.23538	1.3696	0.0734247	-0.795116	0.791928	0.442825	-0.50046	0.411171	0.551277
2349	GPD2	P41911	TRUE	1.03904	1.87244	0.0355381	0.938715	3.3166	0.00273941	0.194479	0.259301	0.773083	0.0341601	0.0536602	0.92587
3851	YDL144C	Q07589		-1.04201	1.87091	0.0356132	-0.860214	2.0123	0.022859	-0.0319109	0.0449579	0.963901	-0.0808411	0.064767	0.913369
1207	MRP4	P32902	TRUE	-0.919807	1.86823	0.0358007	-1.10151	2.09563	0.0196476	-0.178394	0.285089	0.756009	0.218673	0.154858	0.797454
3101	SAM50	P53969	TRUE	-1.11613	1.86701	0.0358676	-1.02635	2.16385	0.0174148	-0.424258	0.773567	0.449823	-0.567919	0.893222	0.277605
344	PET54	P10834	TRUE	-2.9041	1.864	0.0359429	-3.26978	2.39368	0.0118097	-0.675199	0.681581	0.492095	-0.858314	0.523552	0.462754
1225	UFD4	P33202		-1.62028	1.86369	0.0359429	-1.08361	2.80898	0.00601711	-0.86232	1.15381	0.301067	0.31489	1.15566	0.19159
3833	YET3	Q07451		-1.07696	1.86491	0.0359429	-0.713274	1.91267	0.0270889	-0.192009	0.266784	0.767922	-1.24786	1.15421	0.192058
2632	ASK10	P48361		-0.736919	1.86394	0.0359429	-0.994968	3.31306	0.00275374	-1.13455	2.02831	0.119761	-0.922985	1.64553	0.0964599
2870	RPL26B;RPL26A	P53221;P05743		0.782718	1.86466	0.0359429	0.814692	4.13243	0.000873447	0.127036	0.230304	0.797168	0.028285	0.0751002	0.897456
3691	YLR257W	Q06146		0.954897	1.86554	0.0359429	2.23027	4.84281	0.000419405	0.186325	0.326495	0.723492	0.993795	2.42897	0.0368703
3177	SLT2	Q00772	TRUE	-0.489576	1.86222	0.0359979	0.115466	0.347169	0.520395	-0.668962	2.73518	0.049015	0.206029	0.742841	0.336782
1783	YHI9	P38765		0.856819	1.86258	0.0359979	1.17105	1.86441	0.0293586	0.694583	1.11378	0.31613	-0.887995	1.19595	0.180749
1572	LDH1	P38139		-2.19205	1.86001	0.0361148	-3.04207	3.90265	0.00121973	-0.704378	0.61339	0.52098	-1.44552	2.98534	0.0213017
3381	DML1	Q03652		3.04661	1.86034	0.0361148	NaN	NaN	NaN	NaN	NaN	NaN	3.3885	5.13088	0.00215866
3594		Q05016		0.522048	1.85943	0.0361304	1.69655	4.31128	0.000709178	0.383451	1.7752	0.160967	1.08773	2.53308	0.0340473
388	RAD50	P12753		-3.52287	1.85868	0.0361593	-3.38718	3.5743	0.00190406	-0.974037	0.974967	0.370241	-2.31736	2.66784	0.0290156
773	RRP43	P25359		1.93154	1.85799	0.0361837	1.61906	1.59724	0.0482525	0.942134	0.902711	0.395681	0.964828	0.968829	0.248543
888	ERV1	P27882	TRUE	-0.763551	1.8574	0.0362001	-1.31065	1.02971	0.139493	0.187662	0.664138	0.501418	-0.0670385	0.0749402	0.897476
3076	NOP15	P53927		1.88476	1.85536	0.0363367	1.21133	1.98688	0.023828	0.418095	0.283479	0.756009	-0.0964546	0.0797439	0.890538
1702	PAF1	P38351		-0.688344	1.85468	0.0363609	-0.895038	2.11085	0.0191025	-0.347761	1.14452	0.30547	-0.243008	0.614012	0.404787
127	CDC25	P04821		-1.29564	1.84961	0.0367542	-1.66237	1.73918	0.0369825	-0.659002	0.969831	0.372044	-0.846657	3.00073	0.0213017
3030	PDR16	P53860		0.618184	1.84892	0.0367782	-0.481008	2.0581	0.0210445	0.24945	0.376633	0.687589	-0.854757	2.20502	0.0469535
581	RPB4	P20433		0.657204	1.84538	0.0370455	0.678058	1.54996	0.0524519	0.236011	0.73071	0.4678	0.284555	0.505079	0.47477
1560	ARA1	P38115		-0.616312	1.84446	0.0370902	0.0196657	0.0369876	0.932778	0.0492945	0.181177	0.837838	0.420811	2.37111	0.0395796
845	CDC39	P25655		-1.48679	1.84259	0.0371891	-1.26839	3.67482	0.00165701	-0.300276	0.832679	0.427653	-0.0855489	0.262911	0.687135
2979	RCF2	P53721	TRUE	-1.02427	1.84212	0.0371891	-1.12679	1.84183	0.0305385	-0.143904	0.18722	0.832999	-1.24354	1.51579	0.115486
3736	ATP17	Q06405	TRUE	-0.946194	1.84234	0.0371891	-1.35857	4.77665	0.000447406	-0.0106368	0.0131775	0.985344	-0.651665	2.27369	0.0440735
2073	CHZ1	P40019		-0.813843	1.84028	0.0373134	0.139516	0.173407	0.722331	-0.37353	0.522874	0.578107	0.382022	0.369653	0.587087
974	VMA5	P31412		0.595775	1.83148	0.0380424	0.741972	2.91476	0.00511773	-0.0115724	0.018641	0.981955	0.0927348	0.239026	0.710059
2399	OTU1	P43558		-1.735	1.83064	0.0380812	0.251971	0.291433	0.580933	-0.539443	0.584894	0.536893	1.05948	1.48932	0.119068
1788	DOG2;DOG1	P38773;P38774		-1.3444	1.82955	0.0381422	0.277243	0.443687	0.431865	-0.256433	0.146475	0.871524	1.06085	1.73899	0.0861328
4341	RRP12	Q12754		0.765364	1.82877	0.0381423	-0.413568	1.0031	0.146827	0.0094223	0.00658696	0.994358	-1.38368	1.71082	0.0893881
3045	NOP13	P53883		1.41966	1.82885	0.0381423	1.13675	2.79594	0.00615186	0.258856	0.792148	0.442825	-0.0117946	0.0175259	0.975659
309	RPS23B;RPS23A	P0CX30;P0CX29		1.02195	1.8277	0.0381746	0.660748	1.80194	0.032811	0.647363	1.50007	0.211901	-0.18028	0.295012	0.656979
3624	RNH202	Q05635		1.91635	1.82762	0.0381746	-0.439263	0.192396	0.699082	NaN	NaN	NaN	0.0415664	0.0548146	0.924356
2453	FIP1	P45976		1.50693	1.82601	0.0382815	-0.36053	0.516685	0.373365	NaN	NaN	NaN	-0.245093	0.907768	0.271384
1013	HEM12	P32347		-0.73969	1.81641	0.0390985	0.833261	1.1669	0.107772	-0.325057	0.523293	0.578107	0.527112	0.312027	0.640908
3205	TIM44	Q01852	TRUE	-0.484308	1.81606	0.0390985	-0.866171	3.4992	0.00207703	-0.37738	1.20646	0.285502	-0.724194	3.87141	0.00986696
3873	RIX7	Q07844		1.60572	1.81518	0.039142	1.11423	0.998671	0.147859	-0.49124	0.427406	0.647435	-0.593611	0.329551	0.62409
2230	SLM1	P40485		-2.09182	1.81451	0.0391671	-2.28006	3.17131	0.00343527	0.258062	0.464911	0.618441	-0.942913	1.29663	0.155828
1536	UGA2	P38067		0.67506	1.81404	0.0391746	1.01959	2.62836	0.00799657	1.75082	3.38059	0.0244457	1.59913	2.35806	0.0401798
1780	TDA3	P38758		-0.656614	1.81109	0.0394067	0.356161	0.63194	0.300964	-0.313735	0.815544	0.434751	0.566329	1.18196	0.184101
1255	SEC3	P33332		-1.23303	1.81026	0.0394465	-1.12127	3.80957	0.00137075	-0.468944	1.45569	0.223364	-0.0742569	0.115137	0.846278
3637	CDC123	Q05791		2.73969	1.80865	0.0395576	0.226208	0.0615085	0.891239	0.387465	0.205613	0.816413	1.34632	0.740366	0.338461
1436	TCD2	P36101	TRUE	0.484288	1.80757	0.0396201	0.305212	1.00783	0.14542	0.090065	0.224402	0.802474	0.0705256	0.046732	0.934084
270	SSA3	P09435		-2.10336	1.80703	0.0396346	-0.87385	0.695027	0.26665	-1.32668	2.43931	0.0753458	-1.25339	2.32738	0.0418751
848	CDC48	P25694	TRUE	-0.427146	1.80626	0.0396688	-0.218762	1.0808	0.126617	-0.122094	0.408203	0.663219	0.110151	0.45559	0.513815
544	CDC42	P19073		-1.10108	1.80422	0.0398203	-0.697176	0.899197	0.179502	-0.221616	0.247774	0.782155	-0.475623	0.31143	0.641242
4346	YDR381C-A	Q3E6R5	TRUE	-1.52558	1.79885	0.0402797	-1.31463	1.00005	0.147603	-0.469573	0.366651	0.691788	0.37546	0.400016	0.559182
3014	IST1	P53843		-2.97189	1.7943	0.0406059	-0.716092	1.23932	0.0936368	-2.41808	1.66282	0.175772	-0.499703	0.724395	0.34653
2648	MON2	P48563		-1.31088	1.79494	0.0406059	-1.86295	2.84894	0.00562282	-0.609554	0.92132	0.388906	-1.4801	3.50013	0.0141067
2037	GDI1	P39958		-0.775023	1.79419	0.0406059	-0.717968	3.38903	0.00244564	-0.195857	0.847313	0.419505	-0.377035	2.70447	0.0280515
2681	TRM9	P49957		0.879991	1.79268	0.0407113	0.65803	1.04039	0.136908	-0.09727	0.109499	0.898932	0.830763	2.11662	0.0518485
1492	MRPL4	P36517	TRUE	-1.56289	1.79186	0.040752	-2.57353	7.07129	5.03232e-05	-0.191993	0.647377	0.508853	-0.741237	3.22853	0.0174925
2154	TIF34	P40217		0.695322	1.79121	0.0407765	0.281669	2.17115	0.0171867	0.429327	1.22044	0.282692	-0.227082	0.32197	0.631839
567	HSP60	P19882	TRUE	-0.292329	1.79005	0.0408496	-0.153107	1.2364	0.0941393	-0.0108356	0.0449105	0.963901	0.0383425	0.17674	0.775128
3792	MRPL35	Q06678	TRUE	-2.48399	1.78781	0.0409514	-3.45246	3.40344	0.00239371	0.0329351	0.0247988	0.978546	-1.3347	2.22758	0.0461861
539	DDR48	P18899		-2.09725	1.78802	0.0409514	-0.795699	2.17691	0.0171063	-0.31293	0.933301	0.384907	0.315429	1.03224	0.227783
3876	VPS13	Q07878	TRUE	-1.21739	1.78858	0.0409514	-1.61011	4.18945	0.000809916	0.439816	0.421461	0.649974	-0.765694	2.63371	0.0297458
44	QCR7	P00128	TRUE	-1.06346	1.78537	0.0410377	-0.574679	2.68773	0.00728071	0.475947	1.40892	0.236067	-0.120054	0.271147	0.679734
366	RNA1	P11745		0.599976	1.78579	0.0410377	1.0233	2.40059	0.0116712	-0.074379	0.129487	0.886819	0.307044	0.59732	0.415038
3365	MAK3	Q03503		1.6141	1.78542	0.0410377	0.586039	0.173918	0.721738	NaN	NaN	NaN	NaN	NaN	NaN
789	RSA4	P25382		2.81346	1.7858	0.0410377	0.0547752	0.0944717	0.838683	0.821454	0.400583	0.669283	-0.887242	2.51322	0.034309
130	PMA1	P05030		0.327384	1.78179	0.0413408	0.155029	1.61595	0.0465171	0.252541	1.16237	0.299202	-0.391755	2.55538	0.033221
1099	SNQ2	P32568		-2.04876	1.78131	0.04135	-1.11086	1.58495	0.0493463	-4.26878	3.04446	0.0362221	-1.15831	1.22605	0.172842
1108	SRP40	P32583		3.60634	1.78073	0.0413693	2.06653	2.7514	0.00659708	NaN	NaN	NaN	-0.92284	0.416077	0.547117
202	MST1	P07236	TRUE	-1.64943	1.77918	0.0414535	-2.98108	2.10899	0.0191445	0.262542	0.161664	0.857424	-1.46568	1.32943	0.147448
1004	MSS51	P32335	TRUE	-1.17331	1.7787	0.0414535	-1.49462	2.61754	0.0081438	-0.3937	0.684258	0.490534	-0.673588	1.71754	0.088669
267	SUI3	P09064		0.945	1.77902	0.0414535	1.2857	4.01789	0.00103155	0.130103	0.172127	0.847673	0.366585	1.29226	0.156777
2171	YTA7	P40340		-1.35854	1.77775	0.0415079	-2.28701	1.88185	0.0284782	0.137655	0.0664469	0.941884	-0.964661	0.548202	0.448472
3889	SDO1	Q07953	TRUE	1.84626	1.77386	0.0418452	1.05112	1.09886	0.122299	-0.111962	0.0627381	0.945092	NaN	NaN	NaN
3772	YPR172W	Q06608		-1.39495	1.77131	0.0420302	-0.761512	2.89372	0.00529049	0.162372	0.387177	0.678047	0.113518	0.232804	0.714268
4009	NIP7	Q08962		0.543588	1.77118	0.0420302	NaN	NaN	NaN	-1.24562	1.5641	0.197463	-0.420961	0.174714	0.777345
1673	ERV15	P38312		1.6114	1.76665	0.0424338	NaN	NaN	NaN	NaN	NaN	NaN	NaN	NaN	NaN
458	MSS116	P15424	TRUE	-0.597997	1.76558	0.0425022	-1.01621	3.02171	0.00435026	-0.428811	1.65681	0.177319	-1.0964	3.02763	0.0211118
3167	NUM1	Q00402		-0.879314	1.76447	0.0425736	-1.16879	4.44881	0.000604796	-0.266318	0.531173	0.574513	-0.234419	0.798141	0.314558
728	ERG8	P24521		1.01535	1.76319	0.0426616	0.828227	2.06592	0.0207674	-0.275707	0.398975	0.669657	0.376399	0.615908	0.404061
915	MSP1	P28737	TRUE	-2.17156	1.76186	0.0427558	-3.35933	3.42568	0.00232196	-0.405023	0.433211	0.641298	-2.07399	1.72057	0.0884125
667	UBA1	P22515		-0.293729	1.76111	0.0427923	0.44773	2.60622	0.00833609	-0.282513	2.89175	0.0437341	0.629676	3.00416	0.0213017
3573	GAD1	Q04792		-1.40146	1.75978	0.0428868	-1.66551	1.05036	0.134199	-0.151934	0.329411	0.721086	-0.134439	0.161494	0.792693
2799	PEX14	P53112		-1.11857	1.75926	0.0429009	-1.45437	1.84759	0.0302118	-0.355004	0.328603	0.721386	0.297845	0.308747	0.643649
522	CPT1	P17898	TRUE	-1.29844	1.75822	0.0429582	-1.38341	1.00363	0.146712	NaN	NaN	NaN	-0.947228	1.64655	0.0963669
4031	TRM8	Q12009		0.836601	1.75793	0.0429582	1.22934	2.37106	0.0122084	0.367518	0.31601	0.731768	1.74441	2.4291	0.0368703
1429	ANR2	P36090		-2.00197	1.75692	0.0430201	-2.15019	4.10201	0.000900759	-0.310636	0.300157	0.742492	-1.15311	2.58822	0.0314314
1389	LHS1	P36016		-1.07992	1.7562	0.0430546	-1.05018	2.71351	0.00701519	-0.613533	0.990411	0.363442	-1.3745	3.01678	0.0211594
4359	YAL044W-A	Q3E793	TRUE	-1.12521	1.75374	0.0432623	-0.598949	0.493856	0.390544	0.03685	0.0448557	0.963901	-0.278121	0.177822	0.774727
437	GFA1	P14742		-0.675669	1.75275	0.0433228	-0.603267	4.19038	0.000809916	-0.28671	0.630132	0.513415	-0.265501	1.91502	0.0693423
1076	NIP1	P32497		0.406579	1.7501	0.0435511	0.362551	1.29971	0.0834237	0.311452	1.3919	0.237372	0.170978	0.644854	0.388806
1487	SKG1	P36169		-2.60727	1.74537	0.0439895	-0.775746	0.531137	0.363265	-0.97148	0.884953	0.403071	-0.431354	0.560881	0.438957
3033	SQS1	P53866		1.8891	1.74261	0.044232	-1.14876	1.05065	0.134166	NaN	NaN	NaN	NaN	NaN	NaN
513	SRV2	P17555		-0.437635	1.7411	0.0443481	0.224946	1.0389	0.137263	-0.112733	0.318128	0.731195	0.68944	2.9839	0.0213017
1227	ARC19	P33204		-0.870699	1.73832	0.044595	-0.669628	1.13519	0.11426	-0.0695662	0.0939777	0.913809	0.0671129	0.0881776	0.879059
1157	SLA1	P32790		-0.818573	1.73774	0.0446161	-0.380945	1.31284	0.0812803	-0.470027	1.24532	0.275522	-0.486396	1.00718	0.236232
2633	HGH1	P48362		1.84105	1.73583	0.0447738	0.0891056	0.227443	0.655263	0.217623	0.132369	0.885292	0.670292	0.587341	0.421538
3320	RSM10	Q03201	TRUE	-0.948912	1.73526	0.044795	-2.58889	2.4957	0.00999416	1.78836	3.35907	0.0244457	1.56954	0.979758	0.244387
3483	TRS120	Q04183		-2.80381	1.73434	0.0448518	-3.37506	2.7295	0.00684518	-0.520795	0.350741	0.702222	-3.38421	2.39137	0.03886
930	BEM1	P29366		-1.74106	1.73269	0.0449638	-2.03572	2.647	0.00774195	-0.387657	0.249498	0.780748	-0.865098	0.961577	0.251031
2830	MNP1	P53163	TRUE	-0.998739	1.73251	0.0449638	-1.68303	4.09264	0.000906792	-0.300886	0.495338	0.595897	-1.20286	2.1688	0.0486486
3407	NAB6	Q03735		-1.3095	1.73128	0.0450528	-1.04071	1.73016	0.0376513	-1.12368	1.07743	0.327857	-0.407283	0.91795	0.266601
659	RET1	P22276		1.61055	1.7297	0.045178	-0.762846	0.837789	0.201133	0.759238	0.797698	0.441518	-1.1707	1.20919	0.177639
3185	RSM23	Q01163	TRUE	-1.80744	1.72752	0.0453442	-1.79846	2.56562	0.00885055	-0.594184	0.719035	0.472949	-0.666622	0.513568	0.470681
3766	CDD1	Q06549		0.425951	1.727	0.0453442	-0.979927	1.42574	0.0663499	NaN	NaN	NaN	NaN	NaN	NaN
1204	IMP3	P32899		1.598	1.72704	0.0453442	0.229281	0.455938	0.422129	-0.32535	0.213893	0.810223	-0.707848	1.46808	0.122387
1154	MGM101	P32787	TRUE	-0.77574	1.72581	0.0454077	-1.02426	2.79512	0.00615186	-0.0622315	0.216312	0.808394	-0.648018	2.34567	0.0406173
442	ARO3	P14843		0.485781	1.72529	0.0454077	0.402312	1.91195	0.0271168	0.241007	0.865357	0.410463	0.0233202	0.0514802	0.928318
2135	RIO2	P40160		2.1339	1.72545	0.0454077	-0.519721	0.842995	0.199201	1.82029	1.4502	0.22485	-0.754573	0.915208	0.26792
1327	KTI12	P34253		1.79128	1.72427	0.0454756	0.223717	0.175413	0.719911	1.45307	0.93403	0.384907	0.304029	0.20183	0.748822
1786	RRF1	P38771	TRUE	-1.32316	1.7238	0.0454861	-2.96089	2.65856	0.00761938	-0.173796	0.463373	0.619337	-0.939342	0.780618	0.322338
3203	AAT1	Q01802	TRUE	0.791042	1.72186	0.0456516	-0.0746779	0.0780316	0.86345	-1.68364	1.08591	0.324729	-0.907845	0.807972	0.310709
3924	REX4	Q08237		2.94454	1.71758	0.0460639	NaN	NaN	NaN	NaN	NaN	NaN	NaN	NaN	NaN
156	CDC37	P06101		-0.447108	1.71677	0.0460729	0.663105	1.50575	0.0569985	-0.260069	0.638275	0.509721	0.825875	1.84052	0.076117
1908		P38966		2.46129	1.71698	0.0460729	NaN	NaN	NaN	NaN	NaN	NaN	NaN	NaN	NaN
263	CYR1	P08678	TRUE	-2.43115	1.71494	0.0462285	-3.3613	2.37687	0.0120771	-0.98671	0.996514	0.361893	-1.96007	2.96334	0.0215392
3111	SUB1	P54000		-0.674795	1.71395	0.046287	0.567046	0.859311	0.193289	-0.0131683	0.022351	0.97912	-0.155508	0.235602	0.712013
1963	RPS14B	P39516		0.337214	1.71365	0.046287	0.714576	2.14449	0.0180156	0.00403309	0.0171013	0.982653	0.142091	0.286879	0.664264
3713	DBP9	Q06218		0.936441	1.71102	0.0465295	0.669899	2.29792	0.0139023	0.318431	0.4766	0.609251	-0.258702	0.507753	0.473633
3621	HEL2	Q05580		1.27663	1.70889	0.0467187	0.191338	0.191493	0.700322	0.0160007	0.0183068	0.981955	-0.347386	0.276773	0.674768
662	MRPL8	P22353	TRUE	-1.32247	1.70835	0.0467376	-2.19322	1.40601	0.0686493	-0.372954	0.423718	0.648359	-0.0448585	0.0326379	0.954372
1256	SLC1	P33333		-0.900492	1.70789	0.0467485	-0.541438	2.13819	0.0182147	-0.678404	1.52424	0.206542	-0.312534	1.53653	0.112453
620	UBC1	P21734		-0.49333	1.7074	0.0467621	0.283934	1.00094	0.147438	-0.0482755	0.089534	0.918277	0.766065	2.51052	0.034309
2727	YPT32	P51996		-0.539798	1.70698	0.0467677	-0.633326	1.49412	0.0581574	-0.342845	0.930697	0.384907	-0.276789	0.653677	0.38434
551	RGR1	P19263		-2.34168	1.70598	0.046836	0.222152	0.374656	0.495083	0.462706	0.662071	0.502521	-0.475913	0.476902	0.496064
3896	LCL2	Q08045		0.733081	1.7012	0.0473155	-0.638339	0.547025	0.352348	-0.354863	0.673302	0.497453	NaN	NaN	NaN
2647	CLA4	P48562		-0.731684	1.69727	0.0476655	-1.80469	2.32417	0.013229	-0.631552	1.70473	0.173309	-0.620037	0.409716	0.551866
4320	ENT1	Q12518		-0.717623	1.69754	0.0476655	-0.551409	2.05896	0.0210201	0.0634451	0.0833049	0.926266	-0.260642	0.77953	0.322739
3160	CTR9	P89105		-1.09848	1.69495	0.0478809	-1.16439	3.85398	0.00131744	0.0206666	0.0365685	0.969991	-0.677755	2.22515	0.0461861
4185	RRP42	Q12277		2.02043	1.69322	0.0480315	0.700425	0.832389	0.203097	-0.518099	0.354057	0.698964	NaN	NaN	NaN
711	PRE7	P23724		-0.78865	1.68789	0.0485845	-0.579024	2.46849	0.0104744	-0.170086	0.383211	0.681361	-0.63859	2.18301	0.0474715
880	SPT5	P27692		0.339801	1.68344	0.0490443	-0.412508	1.46315	0.061764	0.284739	0.947446	0.379806	-0.196821	0.653486	0.38434
4137	BUG1	Q12191		-0.77076	1.67884	0.0495236	0.782635	1.38295	0.0716528	-0.0217719	0.0402591	0.967298	0.553257	0.900814	0.27459
2773	TAN1	P53072		0.86176	1.67849	0.0495236	2.13485	1.30121	0.0831737	-0.40822	0.311373	0.736649	0.962999	0.555691	0.443085
3805	IKI3	Q06706		0.798538	1.67697	0.0496561	1.05308	2.75194	0.00659572	0.512637	0.693824	0.485526	0.453399	0.480663	0.493455
2982	MRPL50	P53724	TRUE	-0.857143	1.67631	0.04969	-1.14864	0.681299	0.273589	0.0729208	0.121112	0.891784	-0.411615	0.395131	0.563689
2066	HEM14	P40012	TRUE	-2.35421	1.67515	0.0497822	-2.16467	2.38186	0.0120072	-0.889742	1.40922	0.236067	-1.39049	1.28823	0.157924
3040	IPI3	P53877		2.19213	1.67306	0.0499803	1.46915	2.42627	0.0112234	-0.0896945	0.0404328	0.967298	-0.360662	0.474224	0.497929
3658	RSA3	Q05942		3.31313	1.67116	0.050158	1.8597	0.888261	0.183273	1.03604	0.30979	0.737742	NaN	NaN	NaN
1323	UTP11	P34247		2.19535	1.66714	0.0505827	1.32606	1.86298	0.0293847	1.11011	0.793823	0.442825	-0.716857	0.776133	0.324021
1865	GPI16	P38875		-1.22012	1.66497	0.0507944	-0.673386	1.70197	0.0396133	-0.255225	0.338195	0.713937	-0.46324	1.38072	0.137876
886	KTR1	P27810		1.22236	1.66277	0.0510103	1.09228	3.25586	0.00300414	0.813457	1.04227	0.343199	0.531805	1.10818	0.20519
514	PET123	P17558	TRUE	-1.90894	1.66238	0.0510134	-0.421186	0.138299	0.769678	0.180681	0.12375	0.889861	0.0474911	0.0167858	0.976678
1816	SFB3	P38810		-0.511138	1.6613	0.0510988	-0.631993	1.55439	0.0521103	-0.370822	0.935062	0.384907	-0.438762	0.76675	0.327216
2138		P40165		-1.11095	1.65988	0.051224	-1.01603	0.842364	0.199413	0.166137	0.178456	0.840743	-0.0637131	0.0339253	0.952068
2741	ALT2	P52892		-2.24018	1.65898	0.0512876	-2.14301	2.30673	0.0136639	-1.02764	1.81299	0.156137	-0.565696	0.577253	0.427596
287	RPL11B;RPL11A	Q3E757;P0C0W9		0.425926	1.65315	0.0519387	0.559345	2.36665	0.0122558	0.254102	1.6111	0.184488	-0.138544	0.387735	0.570277
90	RPL28	P02406		0.69674	1.65183	0.0520108	1.61783	3.93287	0.00116	-0.00418568	0.00599687	0.995076	1.07126	3.84009	0.00999141
2634	PAC10	P48363		1.48373	1.65211	0.0520108	0.865936	2.06151	0.0209411	0.785854	0.990259	0.363442	-1.12229	2.73895	0.0278205
4212	TIM22	Q12328	TRUE	-1.06163	1.64929	0.0522727	-0.467122	0.630686	0.301506	NaN	NaN	NaN	0.428423	0.667861	0.376939
2116	COX15	P40086	TRUE	-1.28326	1.64888	0.0522795	-1.15753	2.97301	0.00469163	-0.0282302	0.0237807	0.978546	-0.978339	2.41561	0.037069
1922	FET3	P38993		2.45786	1.64772	0.0523773	NaN	NaN	NaN	3.19466	2.35553	0.0842719	1.52717	0.668066	0.376939
673	ESS1	P22696		-0.7025	1.64684	0.0524399	0.135163	0.539625	0.35735	-0.103697	0.13939	0.880219	0.372738	1.3782	0.138293
1984	MBP1	P39678		-3.23482	1.64378	0.0527392	-2.93506	3.24946	0.00302643	-1.6887	1.01742	0.353294	NaN	NaN	NaN
2710	SOL1	P50278		-0.670205	1.64366	0.0527392	-1.00824	1.70283	0.0395575	0.148571	0.289165	0.753423	-0.228456	0.313026	0.640156
1388	YKT6	P36015		-1.18528	1.64245	0.0528002	0.861759	2.26502	0.0147429	-0.105227	0.0563466	0.950674	0.63355	1.824	0.0773459
235	ILV2	P07342	TRUE	-0.231354	1.64262	0.0528002	-0.519931	1.83473	0.0309311	-0.18321	1.10496	0.319976	-0.67923	2.1553	0.0489388
1612	LDB7	P38210		-2.14382	1.6419	0.0528241	NaN	NaN	NaN	NaN	NaN	NaN	NaN	NaN	NaN
1043	APE2	P32454	TRUE	-0.554425	1.64126	0.0528589	-0.251605	1.35867	0.0747546	-0.155495	1.05899	0.335439	0.458808	1.59639	0.103156
1585	SEA4	P38164		-0.969971	1.63803	0.0532104	-1.20442	1.01265	0.144193	-0.541884	0.783365	0.444587	-1.06436	0.725116	0.34653
1546	AKL1	P38080		-0.774674	1.63571	0.0534513	-0.695354	2.43722	0.0110087	-0.61618	1.79515	0.15827	-0.0318789	0.0401203	0.944263
2310	LCB2	P40970		-1.52849	1.63316	0.0537233	-0.501047	0.607168	0.314638	-0.0613632	0.0735241	0.935428	-0.105716	0.0948581	0.871125
3552	COG8	Q04632		-1.0913	1.63212	0.0538082	0.168719	0.202983	0.685813	-0.378734	0.52628	0.576453	-0.984751	1.92488	0.0681634
3340	SDC1	Q03323		1.11205	1.62852	0.0542123	NaN	NaN	NaN	0.909752	1.37403	0.239652	0.958605	0.835377	0.298308
2357	REF2	P42073		-1.34165	1.62795	0.0542389	-0.832033	1.67742	0.0415219	-0.514908	0.339237	0.713277	-0.618127	1.08512	0.211102
3129	DAK1	P54838		-0.471982	1.62715	0.0542956	0.450372	2.58172	0.00863548	0.058835	0.124124	0.889861	0.647089	3.0198	0.0211594
2639	BPL1	P48445		-1.23251	1.62647	0.0543367	-1.04343	2.38957	0.0118926	-0.87641	1.20887	0.284839	-0.244191	0.352442	0.603316
1650	PHO88	P38264		0.629394	1.62572	0.0543859	0.629874	2.00698	0.0230112	0.261152	0.672424	0.497453	0.184925	0.897556	0.275875
3689	DIC1	Q06143	TRUE	-1.37426	1.62331	0.0546005	-0.496587	0.277368	0.597329	-0.0791807	0.0787739	0.930358	-0.0594339	0.0528517	0.926363
1754	RRP3	P38712		0.834616	1.62343	0.0546005	0.221576	0.32635	0.543652	-0.368706	0.501964	0.591534	-0.00378561	0.00468937	0.994428
3346	YDR476C	Q03362		-1.59905	1.62198	0.0547244	-1.58304	1.83896	0.0306722	0.0560536	0.0694762	0.939605	-0.584172	0.465483	0.506101
3606	ERP1	Q05359		-0.613673	1.62128	0.0547683	-0.483789	3.60347	0.00182431	-0.0031538	0.00604122	0.995076	-0.304758	0.663775	0.379422
1447	YKR018C	P36114		-0.591964	1.61867	0.0550538	-0.472775	1.81985	0.0316886	-0.18136	0.39221	0.674764	-0.227582	0.863114	0.286869
48	TDH2	P00358	TRUE	0.418568	1.61299	0.0556893	2.54937	2.66466	0.00753029	0.492288	2.92776	0.0436616	0.707335	0.585291	0.422638
4277	ERG27	Q12452		1.01012	1.61299	0.0556893	0.336728	0.604492	0.316017	0.436374	1.00035	0.360758	-0.462921	1.24969	0.167086
2925	YAP1802	P53309		1.68967	1.61049	0.0559651	-2.99604	1.61139	0.0469601	NaN	NaN	NaN	NaN	NaN	NaN
3982	CIR2	Q08822	TRUE	-0.519845	1.60946	0.0560531	-1.22555	3.47916	0.00214626	-0.000779629	0.00144449	0.998258	-0.783067	1.90111	0.0703121
1238	CSE1	P33307		1.78158	1.6085	0.0561331	2.30878	3.53757	0.00199722	0.351203	0.135785	0.883849	2.44152	2.19006	0.0473257
2473	RPS10A;RPS10B	Q08745;P46784		0.803649	1.6073	0.0562423	0.491106	1.76578	0.0351458	0.281338	0.492263	0.598862	-0.136888	0.16474	0.788616
2599	STE24	P47154		-0.293938	1.60692	0.0562472	-0.37343	1.02375	0.141006	0.00618696	0.00788038	0.993011	-0.546484	5.00576	0.00253203
2322	OST1	P41543		-0.552018	1.60168	0.0568836	-1.44509	3.27427	0.00292719	0.0157371	0.0339045	0.971291	-1.90354	2.25702	0.0447157
4055	RCN2	Q12044		-0.409826	1.60006	0.0570518	-0.165088	0.301586	0.569463	-0.00550365	0.0144287	0.984517	0.982262	2.14875	0.0491241
2769		P53066		-0.62414	1.59643	0.0574841	-0.332736	0.317466	0.552559	0.421993	0.514407	0.583474	-0.135431	0.1261	0.834451
3469	LRS4	Q04087		1.53419	1.59581	0.0575204	1.21236	0.694816	0.266681	NaN	NaN	NaN	NaN	NaN	NaN
1464	PET10	P36139		-0.503935	1.59497	0.0575861	0.140924	0.583114	0.328674	-0.128095	0.334912	0.716191	0.48243	1.36671	0.140045
3948	ALE1	Q08548		-1.53868	1.59197	0.0578568	-1.2971	2.96681	0.00471818	-0.879697	1.18829	0.291463	-0.108613	0.159555	0.793277
3501	SEG1	Q04279		-0.643929	1.59155	0.0578568	-0.766249	1.47002	0.0610103	-0.525998	1.84625	0.150554	-0.129061	0.22925	0.717859
2854	ERG26	P53199		-0.627326	1.59205	0.0578568	-0.218361	0.58881	0.324967	-0.0462704	0.0756324	0.934337	-0.849383	2.08599	0.0545555
1872	UTP9	P38882		1.10482	1.59158	0.0578568	-0.31197	0.428952	0.44452	0.0945163	0.10069	0.905302	-0.548856	0.614339	0.404701
2413	GNA1	P43577		-0.817728	1.59021	0.0579898	-0.372743	0.341872	0.526097	-0.0416141	0.0569599	0.949897	0.619109	0.776009	0.324021
4174	GIN4	Q12263		1.42417	1.58609	0.0584954	-1.15925	1.45194	0.0630605	-0.767016	0.305302	0.738674	-0.630816	0.911581	0.269781
194	RAD3	P06839		-1.50653	1.58499	0.0585972	-2.07859	2.85436	0.00557809	0.069366	0.0878673	0.920824	-1.8743	2.19898	0.0471378
501	FCY2	P17064		1.83245	1.58462	0.0586014	NaN	NaN	NaN	NaN	NaN	NaN	-0.116367	0.127822	0.832656
1440	RPL14A	P36105		0.681887	1.58167	0.058932	0.688707	2.25866	0.0149151	-0.413489	0.844618	0.420554	-0.735552	2.02651	0.0594798
142	RPL7A	P05737		0.716602	1.58149	0.058932	3.46059	1.03013	0.139493	-0.229046	0.607597	0.524325	3.32241	0.975355	0.246344
4253	NPC2	Q12408		-1.50445	1.5807	0.0589924	-2.85237	1.08193	0.126397	-0.215278	0.476463	0.609251	0.128303	0.280767	0.670419
2616	ALD2	P47771		-1.02819	1.57999	0.0590429	-0.573217	3.01441	0.00438923	0.218101	0.260959	0.771163	0.264701	0.309241	0.643384
857	PPZ1	P26570		-0.723647	1.57901	0.0591288	-1.41996	2.84682	0.00564414	0.112295	0.252174	0.779315	-0.343006	1.46218	0.12309
2678	NIT3	P49954	TRUE	-0.701975	1.57805	0.0592127	0.276748	0.249313	0.628798	-0.304988	0.86076	0.412091	0.22116	0.167895	0.784905
3162	GPD1	Q00055		-0.279267	1.57732	0.0592666	1.17801	2.9441	0.00491104	0.155988	1.07264	0.329861	0.628868	1.52525	0.114379
3572	RKR1	Q04781		-0.847926	1.5744	0.0596186	-0.354126	0.14635	0.757795	-0.218562	2.07388	0.114714	-0.72592	0.389155	0.569036
1302	TOD6	P34219		2.37035	1.57304	0.0597585	NaN	NaN	NaN	NaN	NaN	NaN	NaN	NaN	NaN
2470	DLD2	P46681	TRUE	-0.665879	1.57183	0.0598789	-0.965293	2.37106	0.0122084	-0.20054	0.523557	0.578107	-0.229515	0.826369	0.302132
3486	CUE4	Q04201		-0.821746	1.56984	0.0600123	-0.993572	1.32779	0.0789671	-0.273406	0.769429	0.451454	NaN	NaN	NaN
318	RPS11B;RPS11A	P0CX48;P0CX47		0.965819	1.57018	0.0600123	0.985398	2.99995	0.0044929	0.613534	1.10247	0.320579	0.146417	0.389475	0.569026
3251	PET117	Q02771	TRUE	1.68868	1.57037	0.0600123	NaN	NaN	NaN	2.09933	2.05532	0.116381	2.20912	1.38536	0.137445
38	TIM9	O74700	TRUE	-0.581595	1.56917	0.0600575	-0.128559	0.368499	0.500172	0.367999	0.910338	0.393231	-0.466667	0.749998	0.333391
3939	VHS3	Q08438		-1.10082	1.56475	0.0606248	-0.051733	0.0997528	0.830384	-0.0601649	0.0543567	0.952679	-0.396306	0.269323	0.68116
2672	RPL4B	P49626		0.757247	1.56301	0.0608209	0.802299	2.73982	0.00670523	0.146141	0.641891	0.509676	NaN	NaN	NaN
350	MAK16	P10962		2.39313	1.56206	0.0609063	0.436126	0.546762	0.352384	-0.385168	0.157534	0.861224	NaN	NaN	NaN
793	RPC53	P25441		1.86925	1.55993	0.061158	-0.0354028	0.0242815	0.955561	0.803204	0.763342	0.453659	-0.331735	0.195858	0.756103
3058	GIM3	P53900		1.72337	1.55956	0.0611615	2.07855	3.42841	0.0023151	0.509844	0.587273	0.536615	-0.418612	0.235384	0.712013
3806	VAC14	Q06708		-1.59738	1.55404	0.0618453	-0.971503	1.36846	0.0735476	0.416435	0.244122	0.784608	-0.17455	0.118817	0.841699
710	TOM40	P23644	TRUE	-0.804745	1.55391	0.0618453	-0.938667	2.74769	0.00661898	0.160007	0.229148	0.79859	-0.756937	2.99436	0.0213017
1196	LIP5	P32875	TRUE	-0.740002	1.55338	0.0618453	0.143115	0.207784	0.679528	-0.411218	0.35002	0.703039	-1.03621	1.28094	0.159361
2988	ARC35	P53731		-0.53477	1.55351	0.0618453	-0.617008	2.7615	0.00650667	-0.165915	0.589975	0.535477	-0.0929055	0.33903	0.615948
2603	ENT3	P47160		-0.581835	1.55222	0.0619632	-0.0884848	0.394327	0.475668	0.0480356	0.138611	0.881338	0.721784	4.52898	0.00414011
1365		P35725		-0.948986	1.55089	0.0621048	-2.21868	1.90596	0.0273741	-1.11957	1.54892	0.199642	-1.86523	0.923915	0.264754
3069	FAR11	P53917		-1.09063	1.54821	0.0624406	-1.36048	2.01125	0.0228763	-0.379786	0.364584	0.691788	-0.288288	0.0815812	0.888163
1424	RRP14	P36080		1.93531	1.54162	0.0633454	0.116248	0.0376202	0.931952	0.962193	0.490665	0.600703	0.404065	0.0906456	0.875916
3241	DYN2	Q02647		-1.10157	1.54083	0.0634123	-1.53043	1.07266	0.128662	-0.211986	0.24164	0.786356	-0.975836	0.505976	0.474317
1694	TAE1	P38340		1.54736	1.54006	0.0634763	0.562816	0.575019	0.334031	1.447	1.27475	0.264656	-0.510411	0.480091	0.493626
1508	ABZ1	P37254		-1.32577	1.53923	0.0635478	-0.465348	0.142234	0.763872	-0.506418	0.484852	0.603888	-1.2876	0.99399	0.240888
4340	HAA1	Q12753		-2.19575	1.53286	0.064437	-2.71022	3.01602	0.00437947	-0.440022	0.388273	0.677382	-0.746599	0.726763	0.345804
2812	PRP43	P53131		1.23396	1.53047	0.064742	1.38542	4.30873	0.00071023	-0.292525	0.314917	0.732404	0.043808	0.0592378	0.919688
4225		Q12354	TRUE	-0.891172	1.52936	0.0648584	-0.823091	0.640486	0.296466	-0.17539	0.223864	0.802881	-1.08294	0.848998	0.292371
1813	RPF1	P38805		3.34534	1.52871	0.0649053	0.873795	1.28814	0.0854348	-0.132555	0.0393067	0.968187	-1.55493	1.68823	0.0917826
523	PDI1	P17967		0.242903	1.5266	0.065171	-0.034935	0.202487	0.686385	-0.140743	0.721118	0.471792	-0.025156	0.119205	0.841402
1562	MRPS9	P38120	TRUE	-1.35307	1.52565	0.0652636	-1.24343	2.19609	0.0165953	0.229556	0.370729	0.690163	-0.790326	1.76279	0.0832993
4410	RIB3	Q99258	TRUE	-0.780399	1.52416	0.0653874	0.87216	2.0035	0.0231289	-0.360505	0.578153	0.540224	0.599749	1.13769	0.196599
2005	GCV3	P39726	TRUE	-0.496721	1.52432	0.0653874	0.876909	1.57034	0.0505491	0.0325475	0.055237	0.951722	1.34767	2.48165	0.0353897
1775	HSE1	P38753		-1.40887	1.52282	0.0654889	-0.528275	0.311694	0.55851	-0.497626	0.625145	0.517189	NaN	NaN	NaN
2089	VTC1	P40046		1.66795	1.52286	0.0654889	NaN	NaN	NaN	1.50045	1.30792	0.253255	2.91036	2.21149	0.0468047
2916	ATF2	P53296		-1.38203	1.52125	0.065675	1.08183	0.65853	0.285888	-4.99373	6.31192	0.00030915	NaN	NaN	NaN
3190	CTF4	Q01454		-1.29759	1.51955	0.0658825	-0.92256	0.883721	0.185026	-0.607641	1.60444	0.185451	-0.232478	0.173447	0.778469
1781	VPS29	P38759		-1.80629	1.51848	0.0659942	-1.24206	2.21716	0.0160563	-0.468048	0.297595	0.744471	-0.767339	1.1283	0.198737
134	RPP1A	P05318		0.531816	1.51808	0.0660043	0.945701	1.77798	0.0344072	0.0967922	0.296381	0.745143	0.00682259	0.00900343	0.987422
1565	RIM2	P38127	TRUE	-1.66835	1.51707	0.0660573	-3.46853	3.62172	0.001784	-0.263967	0.337947	0.713994	-2.54381	4.26295	0.00622443
2109	SCS2	P40075		-0.380312	1.51736	0.0660573	0.7184	2.16392	0.0174148	-0.1561	0.785335	0.443568	0.423837	0.762344	0.328303
4129	MAK21	Q12176		0.968709	1.51622	0.0661362	0.212147	0.264463	0.611335	0.620161	1.07533	0.328633	-0.277221	0.343697	0.610965
913	SBA1	P28707		-0.434573	1.51475	0.0662709	0.322171	0.783752	0.223863	-0.145673	0.372952	0.690163	0.712039	1.09108	0.20979
3607	RQC1	Q05468		1.43144	1.51467	0.0662709	-0.0824189	0.0686166	0.879818	0.0316105	0.0456716	0.963716	-1.06936	1.26376	0.163334
4404	PNO1	Q99216		0.628411	1.51315	0.0664529	0.553726	1.34731	0.0762959	-0.485211	1.06745	0.331782	0.328738	0.615984	0.404061
580	SRP54	P20424		0.892663	1.51204	0.0665726	0.53374	0.706455	0.26063	0.280871	1.28669	0.260034	0.271337	0.411685	0.551277
3093	SFB2	P53953		-1.18003	1.51146	0.066611	0.439325	0.396618	0.473479	-0.767501	0.702695	0.481305	-0.177195	0.111765	0.849659
2550	NOP9	P47077		1.4905	1.51112	0.0666121	0.391771	0.883274	0.185095	-0.146367	0.11668	0.896222	-0.510902	0.670937	0.37492
2029	RSP5	P39940		-0.700512	1.5065	0.0672219	-0.771268	2.31939	0.0133544	-0.0569229	0.177773	0.841057	0.030201	0.0580447	0.921272
3954	MCA1	Q08601		-0.614678	1.50668	0.0672219	0.856493	1.44469	0.0639613	0.0610447	0.148031	0.87029	1.02756	1.39452	0.135666
4131	YPL245W	Q12179		2.46784	1.50481	0.067434	NaN	NaN	NaN	NaN	NaN	NaN	NaN	NaN	NaN
1080	GCD7	P32502		1.27279	1.5028	0.0676956	-0.167527	0.292356	0.580022	0.412871	0.33857	0.713937	-0.780793	2.54736	0.0333232
3866	YEH1	Q07804		2.71988	1.50124	0.0678865	NaN	NaN	NaN	NaN	NaN	NaN	NaN	NaN	NaN
1753	INM1	P38710		1.35196	1.50004	0.0680234	NaN	NaN	NaN	-0.323536	0.1637	0.855428	0.689419	0.551722	0.445539
2859	NMA2	P53204		-2.27877	1.49871	0.0681798	-0.992291	0.473147	0.407525	0.101111	0.0785517	0.930358	0.250866	0.128448	0.832656
3100	CRZ1	P53968		-1.35964	1.49332	0.068979	-2.14802	2.96985	0.00469676	0.0215998	0.0208079	0.980208	-1.41948	2.2342	0.0459541
59	CDC28	P00546		-1.08309	1.4927	0.0690073	-0.786459	3.28636	0.00287073	-0.374818	0.360809	0.692669	-0.342241	1.08691	0.210751
1503	MRPL40	P36534	TRUE	-0.772675	1.49249	0.0690073	-0.773289	1.02738	0.140069	-0.153931	0.205185	0.816413	-0.0564342	0.0571914	0.922168
3687	YLR345W	Q06137		-2.25653	1.49034	0.0692971	-1.23981	0.601975	0.317174	0.0929642	0.0372109	0.969582	0.250624	0.188382	0.762471
4166	FYV7	Q12247		2.21795	1.48857	0.069528	NaN	NaN	NaN	NaN	NaN	NaN	NaN	NaN	NaN
1645		P38256		-1.13895	1.48696	0.069691	0.0842276	0.0910651	0.842818	0.0388589	0.0356126	0.970565	0.75606	1.21175	0.177047
2398	FMP32	P43557	TRUE	1.42562	1.4869	0.069691	-2.97689	2.45694	0.010668	1.79759	1.73645	0.166968	-1.18201	1.42008	0.131652
248	PBS2	P08018		-1.28615	1.48656	0.069693	-1.02139	2.38091	0.0120236	-0.709393	1.59199	0.189066	-0.180274	0.382801	0.574713
1647	EXO84	P38261		-2.48954	1.486	0.0697307	-3.41236	2.8575	0.00557425	-1.67597	0.630499	0.513415	-1.56535	1.20761	0.17791
1737	PRS3	P38689		0.631444	1.48549	0.0697605	0.259256	0.276786	0.597329	0.134438	0.139407	0.880219	-0.413972	1.07724	0.212651
160	SCP160	P06105		0.383621	1.48416	0.0699222	0.808562	4.65652	0.00050952	-0.0700836	0.205508	0.816413	0.150371	1.46394	0.122733
2151	RPL13B;RPL13A	P40212;Q12690		0.422414	1.48313	0.070036	0.385639	2.73771	0.00673079	-0.0693693	0.218234	0.808371	-0.241004	1.0659	0.21596
752	SCJ1	P25303		0.795154	1.48091	0.0702897	0.194106	0.167275	0.729989	0.041431	0.0518352	0.957248	-0.0859919	0.125709	0.834899
1198	DRS1	P32892		0.918264	1.48098	0.0702897	0.615016	1.57861	0.0498067	0.546774	0.585209	0.536893	-0.174325	0.166774	0.786337
1496	MRPL15	P36523	TRUE	-1.62056	1.47808	0.070695	-1.27064	2.12699	0.0185861	0.290048	0.238563	0.788776	-1.0512	0.764668	0.327455
1934	POP2	P39008		1.4591	1.47723	0.0707368	0.0166731	0.00707998	0.986325	1.35072	1.29759	0.256636	0.337011	0.249304	0.701264
719	RPL24B	P24000		1.80509	1.47718	0.0707368	2.42364	5.58284	0.000190106	0.684176	0.485023	0.603888	0.821444	1.61053	0.100921
475	POL30	P15873		0.661926	1.47672	0.0707596	1.23313	4.05269	0.000963754	0.122488	0.324085	0.725023	1.25997	4.09988	0.00758576
1133	RAD23	P32628		0.475895	1.47308	0.0712946	0.635194	1.7091	0.0390779	0.0743818	0.158505	0.860064	0.553798	1.11983	0.201081
4402	NOP14	Q99207		1.05037	1.4728	0.0712946	0.699211	1.43436	0.065338	-0.133883	0.204879	0.816594	-1.01458	0.958589	0.252388
455	SEC23	P15303		-0.363998	1.47175	0.0714127	-0.292865	2.12351	0.0186831	-0.0571556	0.201255	0.819714	-0.173539	0.825715	0.30219
1142	DNF1	P32660		-1.48835	1.46981	0.0716619	-1.71431	4.59783	0.00053718	-1.07897	2.87251	0.0437341	-1.07297	2.22572	0.0461861
385	YPK1	P12688		-1.45632	1.4696	0.0716619	-1.2136	3.39643	0.0024206	-0.724159	0.791653	0.442825	-0.17771	0.340523	0.61437
2519	ALB1	P47019		1.61289	1.46804	0.0718658	2.83021	2.86143	0.00555018	1.59261	1.40506	0.236067	1.18166	1.15751	0.191243
856	BUB3	P26449		2.28722	1.46619	0.0721184	NaN	NaN	NaN	5.35121	3.55996	0.0189822	4.19452	3.33454	0.0163814
3067	KRE33	P53914		1.59634	1.46544	0.0721902	1.11847	2.849	0.00562282	0.240653	0.159644	0.859398	-0.764721	1.48314	0.119647
3493	RRB1	Q04225		0.540313	1.45829	0.0733341	0.91228	1.2947	0.0843033	0.183667	0.543192	0.564392	-0.23349	0.257716	0.692125
3688	KAP95	Q06142		-0.724204	1.45673	0.0734985	0.391222	0.677463	0.275507	-0.363145	0.567194	0.547321	0.229033	0.245412	0.703691
3466	TIF35	Q04067		0.903581	1.45667	0.0734985	0.480193	1.64939	0.0438277	0.631436	0.934213	0.384907	0.251144	0.629974	0.396175
1994	BDH2	P39713		-1.16399	1.45233	0.074182	NaN	NaN	NaN	-1.07022	1.09049	0.322298	NaN	NaN	NaN
1065	HOG1	P32485		-0.314933	1.45112	0.0743347	-0.725063	1.11525	0.118589	-0.615712	3.35022	0.0244457	-0.813666	0.844267	0.294389
1036	SFP1	P32432		-1.01746	1.44786	0.0747942	-2.77248	1.7184	0.0384223	-0.252163	0.165859	0.853033	-2.23303	1.72928	0.0874098
2563	BNA1	P47096		-0.570107	1.4478	0.0747942	0.293603	0.544215	0.35421	-0.209386	0.311463	0.736649	0.49905	1.29129	0.156972
3495	UBX2	Q04228		-0.734161	1.44721	0.0748418	-1.81379	2.44995	0.0107636	0.207109	0.258214	0.773728	-0.56248	1.08882	0.210564
2414	IES1	P43579		-1.02861	1.44672	0.074871	-1.36161	1.65014	0.0438139	-0.451127	1.26042	0.268572	-1.5163	0.775881	0.324021
2248	SER33	P40510		0.786787	1.44581	0.0749729	0.156353	0.178809	0.715606	-0.285928	0.220752	0.806945	0.331253	0.63297	0.394579
1360	TMA19	P35691	TRUE	0.670727	1.44508	0.0750426	1.34632	5.1611	0.000282217	-0.0157919	0.0210716	0.980208	0.295067	1.77485	0.0819756
2958	RPT4	P53549		-0.682144	1.44309	0.0753329	-0.627007	3.04535	0.0041879	-0.586119	0.930519	0.384907	-0.300519	0.566824	0.434342
2332	SEC27	P41811		-0.699456	1.44219	0.0754336	-0.624099	3.20667	0.0032498	-0.293842	0.518879	0.580641	-0.361725	2.90066	0.0234567
3550	VBA4	Q04602		-0.797173	1.44053	0.0756498	-0.766567	0.429482	0.444162	-0.80054	2.58257	0.0623215	-0.282234	0.267461	0.682484
3434	GRX3	Q03835		1.06016	1.44031	0.0756498	1.54616	3.56002	0.00194425	0.204897	0.212771	0.81059	1.11629	1.42413	0.130956
115	RPL24A	P04449		0.842991	1.43987	0.0756701	1.70295	2.97176	0.00469456	-0.0207477	0.0251324	0.978546	0.646975	1.10547	0.20607
582	RPB5	P20434		0.700632	1.43841	0.0758701	0.423936	1.36728	0.0736315	0.0581698	0.0918316	0.91604	-0.706736	0.598102	0.414702
2991	DBP6	P53734		1.45013	1.43285	0.0767349	-0.589725	0.291397	0.580933	-0.797568	0.551915	0.556632	-0.873456	0.444511	0.521133
2107	SHO1	P40073		1.56429	1.43293	0.0767349	0.374109	0.312818	0.557245	1.26468	0.940285	0.384101	0.859343	0.711202	0.353422
2239	UTP25	P40498		1.06857	1.43189	0.0768495	-0.0755596	0.0679486	0.880662	-0.626073	0.535802	0.569826	-0.186182	0.194925	0.757146
1715	MGE1	P38523	TRUE	-0.59251	1.42784	0.0775126	-0.0425162	0.0838579	0.854177	-0.182019	0.28003	0.756836	-0.264318	0.800823	0.313426
865	RPS7A	P26786		0.770553	1.42624	0.077741	0.939955	2.39763	0.0117219	0.281163	0.516561	0.581636	0.205918	0.449194	0.518866
1932	PSD1	P39006	TRUE	-1.53163	1.42486	0.0779256	-2.29052	2.06141	0.0209411	-0.251602	0.526247	0.576453	-1.21381	1.38363	0.137509
372	RAP1	P11938		0.495107	1.42458	0.0779256	0.423086	0.47909	0.40226	0.313662	0.693788	0.485526	0.535785	0.64044	0.39165
2373	PMT6	P42934		-1.47407	1.42417	0.0779415	-2.69174	2.53889	0.00926811	-0.0109129	0.0205987	0.980208	-0.505758	0.933619	0.261861
454	AMD1	P15274		-0.229629	1.42375	0.0779618	-0.22229	0.584492	0.327865	-0.213432	0.644151	0.509056	-0.316675	1.60424	0.101847
1145	NRP1	P32770		2.86457	1.41941	0.0786872	NaN	NaN	NaN	3.23201	1.74937	0.164148	5.0786	5.19023	0.00215866
4122	NBP2	Q12163		-1.57087	1.41842	0.0788098	-1.81382	0.901577	0.178735	-0.214313	0.136035	0.883849	0.425761	0.375635	0.581654
1115	GLC7	P32598		-0.339549	1.41804	0.0788207	-0.432654	1.02417	0.140929	0.0477867	0.234508	0.792858	-0.0375423	0.04908	0.931881
2565	GEA1	P47102		-1.63887	1.41654	0.0790356	-1.15787	0.576392	0.333095	0.73381	0.350819	0.702222	0.495201	0.228137	0.718566
1324		P34248		-1.45214	1.41248	0.0797201	-0.678045	0.849805	0.196639	0.438296	0.378637	0.685752	0.551464	0.506095	0.474317
1352	RER2	P35196		-0.97537	1.41163	0.0798186	NaN	NaN	NaN	NaN	NaN	NaN	NaN	NaN	NaN
4335	DFM1	Q12743		-1.72029	1.40974	0.0799929	-1.99919	3.38378	0.00246291	-1.40979	0.937045	0.384907	-0.415132	0.43467	0.529848
4037	CDC53	Q12018		-1.53545	1.41002	0.0799929	-1.16931	1.03954	0.13712	-0.891833	0.809948	0.438032	-0.377765	0.266942	0.683021
413	HOM2	P13663		0.371315	1.41022	0.0799929	1.19266	2.51172	0.00970129	-0.0467806	0.14704	0.870726	0.366561	0.609594	0.406786
286	RPS21A	P0C0V8		0.539114	1.40907	0.0800587	0.497863	2.21386	0.0161188	-0.431201	0.879017	0.405062	-0.582928	1.84616	0.0759132
809	MGR1	P25573	TRUE	-2.28019	1.40683	0.0804152	-2.22273	2.14851	0.0179259	-1.46365	0.821424	0.433964	-1.11545	1.04462	0.2237
4325	RQC2	Q12532		0.886197	1.40625	0.0804649	-0.20523	0.668746	0.280165	0.022737	0.0230566	0.978546	-0.102013	0.260233	0.689134
4123	POM33	Q12164		-1.44196	1.40478	0.0806796	-1.33099	1.76052	0.0354725	0.12002	0.0801297	0.930052	0.424381	0.285618	0.665741
3065		P53912		-0.48038	1.40232	0.0810788	-0.146328	0.115549	0.805799	-0.34729	1.32826	0.246034	0.410888	0.496684	0.480709
147	RPL36A	P05745		0.252413	1.40065	0.0813334	0.981066	4.87427	0.000406968	-0.555002	3.1043	0.0346278	0.421284	1.22518	0.172842
3699	SFH1	Q06168		1.10446	1.39824	0.0817267	0.290123	0.307812	0.56262	0.277397	0.26559	0.768096	0.59461	0.805834	0.311233
3385	SKY1	Q03656		-1.45398	1.39673	0.0819526	-1.76907	2.78311	0.00629043	-0.685433	0.566669	0.547483	-1.09522	2.57194	0.0323543
2104	KAP123	P40069		0.807386	1.3963	0.0819741	1.49217	4.60124	0.00053718	-0.14574	0.203366	0.81751	0.533985	2.44974	0.0361197
4409	MEX67	Q99257		2.81788	1.39547	0.0820733	0.42536	0.771282	0.229331	0.957647	0.371122	0.690163	-0.241604	0.523786	0.462737
729	PKC1	P24583		-1.72942	1.39304	0.0823559	-2.25669	4.83716	0.000419405	-0.398452	0.822034	0.433964	-1.1423	2.702	0.0280515
1542	HMT1	P38074		0.94341	1.39333	0.0823559	0.91494	1.31618	0.0808093	-1.52444	1.18729	0.291557	0.259497	0.362173	0.594818
3211	MTD1	Q02046		0.959058	1.39344	0.0823559	1.53436	2.90172	0.00524883	0.00996256	0.00670592	0.994358	0.736422	0.676687	0.371686
1873	RIX1	P38883		1.1974	1.3881	0.0832386	0.498148	0.824923	0.205899	NaN	NaN	NaN	-0.637993	1.08095	0.211892
2401	FET5	P43561		-1.19129	1.38654	0.0834775	-0.89402	1.7064	0.0392991	-0.344541	0.673338	0.497453	-1.7643	0.732387	0.342784
3947	BUD21	Q08492		1.29068	1.38434	0.0838417	1.3583	1.86171	0.0294527	-1.40509	1.62288	0.183787	-0.790403	0.634283	0.393993
3568	TVP18	Q04767		-1.02869	1.38343	0.0839067	-1.00501	1.06444	0.130747	0.119553	0.122593	0.890652	0.610791	0.584343	0.423337
3394	ROT1	Q03691		2.085	1.38338	0.0839067	NaN	NaN	NaN	1.78232	1.15633	0.301067	0.508478	0.24094	0.708805
1828	BZZ1	P38822		-1.69995	1.38178	0.0841565	-0.963459	2.21731	0.0160563	-1.20062	0.893327	0.401247	-0.314091	0.807315	0.310776
2136	RTT106	P40161		0.726028	1.38118	0.0842134	-0.539947	0.30201	0.56909	-1.64475	2.23416	0.0978213	0.0986643	0.0559091	0.922657
1058	EUG1	P32474		-1.72335	1.38084	0.0842192	-3.74585	5.59534	0.000190106	-0.677292	1.84126	0.151786	-0.790933	1.23992	0.168934
3601	FAR8	Q05040		-2.23296	1.37732	0.0848443	-1.65977	3.25928	0.0029901	-0.0904808	0.0314692	0.972505	-0.805226	0.465983	0.505762
3771	BSP1	Q06604		-1.37143	1.37536	0.0850462	NaN	NaN	NaN	-0.803236	0.850984	0.417109	NaN	NaN	NaN
1391	YPT52	P36018		-1.19221	1.37562	0.0850462	-0.885447	3.43527	0.00229121	-0.296232	0.367361	0.691788	-0.437736	1.33346	0.146673
2760	PPT1	P53043		0.820179	1.37571	0.0850462	2.60418	2.19407	0.0165979	-0.454952	0.716401	0.474713	1.93782	1.53245	0.113371
1747	RPS20	P38701		0.471158	1.3739	0.0852736	1.09364	3.94588	0.00114367	-0.168323	0.392896	0.674764	0.456056	2.19481	0.0471378
3334	HEH2	Q03281		-1.17817	1.37358	0.0852754	-1.91849	3.30317	0.00279664	-1.09121	1.81078	0.156137	-1.664	2.43162	0.0368703
3283	KAP120	Q02932		-2.77679	1.37189	0.0854259	-1.90131	3.07714	0.00399919	-2.2047	2.03327	0.119504	0.144773	0.151343	0.801641
300	SSC1	P0CS90	TRUE	-0.210367	1.3724	0.0854259	0.0651569	0.148442	0.754604	0.0687466	0.617756	0.519677	0.00732422	0.0148285	0.97864
1253	SER1	P33330		0.283109	1.37173	0.0854259	0.117055	0.273677	0.600838	-0.029592	0.0685171	0.939721	-0.253823	0.574285	0.429525
3972	RRS1	Q08746		1.48127	1.37158	0.0854259	0.00505161	0.00202474	0.996469	0.576752	0.498222	0.59403	-1.29114	0.764575	0.327455
2767	RTF1	P53064		-0.415412	1.36942	0.0857922	-0.0966425	0.226886	0.655743	-0.396088	0.316285	0.731768	-0.308199	0.272455	0.678861
2122	YER156C	P40093		1.05579	1.3688	0.0858536	1.39087	3.58889	0.00185969	0.0842972	0.0711423	0.937638	0.00971508	0.00889585	0.987422
1519	APE3	P37302		-0.465466	1.36817	0.0859174	-0.494131	2.68137	0.00733838	-0.0424299	0.10307	0.903608	-0.119987	0.429024	0.534106
2383	GZF3	P42944		1.06369	1.36751	0.0859875	NaN	NaN	NaN	NaN	NaN	NaN	NaN	NaN	NaN
2211	TMA108	P40462		-0.571836	1.36669	0.0860897	-0.42482	0.535691	0.360477	-0.0809617	0.104388	0.902987	-0.400327	0.644906	0.388806
3949	DCI1	Q08558		-1.89981	1.36368	0.0866277	-2.77175	1.69606	0.0400441	-1.03891	0.578795	0.540224	-1.71475	1.20009	0.180134
2950	MKC7	P53379		2.02487	1.36287	0.0867277	1.438	1.32763	0.0789671	0.269924	0.134365	0.883849	NaN	NaN	NaN
2090	ALD5	P40047	TRUE	0.518881	1.36122	0.0869979	0.362499	0.676162	0.27613	-0.158482	0.495309	0.595897	-0.921617	2.32407	0.0420414
2177	RFC2	P40348		0.61287	1.3581	0.0875634	0.507682	0.907822	0.176537	0.241853	0.474568	0.610233	-0.360453	0.619528	0.402544
307	RPL43B;RPL43A	P0CX26;P0CX25		0.469821	1.35692	0.0876788	0.904699	1.97894	0.0242207	0.166232	0.425044	0.648133	0.0774326	0.071626	0.903412
191	TOP2	P06786		0.827941	1.35701	0.0876788	-0.475564	1.10891	0.119966	1.25432	2.6424	0.0565462	0.0958056	0.154592	0.797648
3791	SWA2	Q06677		-1.52852	1.35531	0.0879411	-0.537006	1.02813	0.139884	-1.40133	1.11175	0.316642	0.533924	1.09378	0.20919
1494	MRPL10	P36520	TRUE	-1.4809	1.35468	0.0880084	-3.45533	6.4527	0.00017923	0.692453	0.636129	0.510597	-3.23585	4.3665	0.00509259
1146	SFA1	P32771		-0.386008	1.35424	0.0880362	0.515206	2.51429	0.0096604	-0.409855	1.2173	0.28302	0.495579	1.76637	0.0829055
3106	HEF3	P53978		-0.44834	1.3529	0.0882465	3.22203	2.3881	0.0119133	-0.339977	1.02798	0.347627	2.23518	1.79041	0.080708
3350	VPS72	Q03388		3.32971	1.35046	0.0886804	3.75306	5.9283	0.000190106	2.54032	0.998272	0.361253	2.04083	1.00095	0.238531
2790	DSD1	P53095		-0.965333	1.34899	0.0889192	-0.476298	0.447603	0.429291	-0.0854282	0.136491	0.883849	0.18294	0.299804	0.652792
2019	SSO2	P39926		-0.577927	1.34806	0.0890475	0.534997	1.86409	0.0293625	0.0765967	0.129633	0.886819	0.220199	0.56903	0.43302
1425	YKL077W	P36081		-0.861598	1.34696	0.0892112	-1.64244	2.59811	0.00842043	-0.0160332	0.0261731	0.978546	-0.660246	2.28264	0.0436467
2075	YER034W	P40022		-1.11412	1.34479	0.0895951	NaN	NaN	NaN	-0.852707	3.0861	0.0351637	2.15311	2.62678	0.0297458
641	RPB10	P22139		3.29043	1.34231	0.0900455	1.85227	1.65933	0.0430483	1.7429	0.602699	0.527104	-1.01926	0.506608	0.474317
3331	NGL2	Q03264		0.936649	1.33969	0.0905275	-0.212596	0.352486	0.5149	-0.0340357	0.0397806	0.967727	0.418684	0.325371	0.62812
4420	DDP1	Q99321		-1.61524	1.33791	0.0908255	-1.89784	0.823292	0.206592	-1.32824	1.08971	0.322298	-0.938993	0.337614	0.617421
3247	RPL21A	Q02753		0.67088	1.33766	0.0908255	1.53805	4.06454	0.000946491	0.477928	1.35033	0.240539	0.772414	2.31605	0.042249
4321	TIF6	Q12522		0.79686	1.33618	0.0910715	1.35182	2.87196	0.00545437	0.166843	0.16986	0.848561	1.40134	2.25851	0.0447157
879	COQ3	P27680	TRUE	-1.09739	1.33357	0.0915571	-2.4639	2.01075	0.0228807	0.0400829	0.0356123	0.970565	-1.50937	1.3076	0.153324
2320	LST8	P41318		-1.54204	1.33311	0.0915914	-2.13596	3.58716	0.00185969	-0.233005	0.250445	0.780708	-1.72596	1.18536	0.182998
949	FAA1	P30624		-0.178837	1.33238	0.0916809	-0.627707	3.61068	0.0018009	-0.187446	1.85438	0.148805	-0.140823	0.774019	0.324811
1166	EMP70	P32802		1.25575	1.32772	0.0926074	-0.48596	0.911204	0.175521	0.375788	0.365215	0.691788	0.236186	0.274371	0.67699
2626	ENP2	P48234		1.52769	1.32558	0.0930002	1.03869	3.3502	0.00258722	0.542135	0.379977	0.684384	0.175868	0.227309	0.719369
2929	CPD1	P53314		-0.86597	1.32185	0.0937364	-2.83563	2.91498	0.00511773	-0.00831652	0.0070215	0.994205	-1.16746	1.02751	0.229183
4347	EFG1	Q3E705		1.61535	1.32031	0.094005	0.143098	0.145432	0.759173	0.144654	0.0776369	0.93151	-0.786514	0.984862	0.243375
925	SUA7	P29055		0.749452	1.31727	0.0946008	-0.365702	1.09455	0.123305	0.394009	0.766902	0.451454	-0.482563	1.12942	0.198659
1797	PAN5	P38787	TRUE	0.537974	1.316	0.094812	0.456168	1.26126	0.0897598	-0.27457	0.651121	0.508358	-0.163517	0.590608	0.418917
1576	RIB5	P38145		-0.852365	1.31491	0.0949841	-1.20322	2.49219	0.0100311	-0.700684	0.934947	0.384907	0.440315	0.772406	0.325363
3655	ARC18	Q05933	TRUE	-0.528264	1.31104	0.0957687	-0.0329347	0.0434809	0.922622	0.192842	0.244766	0.784608	0.0376821	0.0294364	0.959074
1545	YRO2	P38079	TRUE	-1.02812	1.31009	0.0958943	-0.12716	0.164996	0.732504	-0.0563288	0.0625624	0.945149	0.294586	0.531235	0.457856
4294	RRP36	Q12481		2.15209	1.30987	0.0958943	0.428417	0.687235	0.270574	NaN	NaN	NaN	-0.879493	1.12789	0.198755
4379	COA6	Q3E846	TRUE	-1.44375	1.30794	0.0962554	-1.98409	2.63121	0.00796651	0.0792909	0.0471503	0.961671	-0.769882	1.13786	0.196599
833	RSC6	P25632		0.511527	1.30757	0.0962707	0.667637	1.19144	0.103138	-0.0256557	0.0308309	0.973224	-0.655718	1.65863	0.0954974
2416	BLM10	P43583		-3.08472	1.30547	0.0966594	-2.77523	0.685853	0.271035	-1.63226	2.86262	0.0437341	-0.659415	0.949734	0.25587
1621	FAT1	P38225		1.87281	1.30523	0.0966594	-1.5783	1.96195	0.0248962	-1.25243	0.634859	0.51062	-1.42789	1.0839	0.211333
483	PDX1	P16451	TRUE	-0.477661	1.30384	0.0969023	-1.30422	4.92639	0.000385447	0.113047	0.224684	0.802387	-0.570573	1.34372	0.144299
1497	MRPL24	P36525	TRUE	-1.486	1.29697	0.0983791	-2.86912	2.60445	0.00834191	-0.461578	0.351891	0.70141	-0.931799	1.04411	0.223782
143	RPL9A	P05738		0.414941	1.29454	0.0988635	1.12098	3.53812	0.00199722	0.132619	0.261042	0.771163	0.381292	1.41268	0.133271
3632	COQ9	Q05779	TRUE	-1.42335	1.29401	0.0989163	-3.14473	3.11724	0.00375172	0.294587	0.306593	0.738474	-0.634974	0.652344	0.384516
2740	NUP84	P52891		-2.94703	1.29309	0.0989954	-3.36978	1.5371	0.053719	-1.74392	0.611706	0.521597	-2.1783	0.869308	0.284937
790	BOS1	P25385		1.0559	1.29307	0.0989954	0.241603	0.889655	0.182758	1.08979	1.33675	0.24409	0.231387	0.230295	0.7167
1100	SRB4	P32569		-1.47517	1.28778	0.100141	-0.992671	0.909916	0.175758	-0.500667	0.650938	0.508358	0.180666	0.290702	0.65992
3831	PEX19	Q07418		-0.602613	1.2837	0.101016	-1.61361	1.84017	0.0306371	0.0752726	0.219593	0.807392	-0.519151	0.910972	0.269966
4427	TRS33	Q99394		-0.889614	1.28187	0.101305	-2.28613	2.37594	0.0120933	NaN	NaN	NaN	NaN	NaN	NaN
1231	RPT1	P33299		0.23564	1.28196	0.101305	-0.58762	2.05199	0.0211993	0.147962	0.55366	0.555442	-0.197692	0.596308	0.415785
1989	ERP2	P39704		-0.711157	1.27835	0.102059	-0.68749	2.53122	0.00937414	-0.146655	0.213197	0.81059	-0.475098	1.83686	0.0763688
2592	RSM26	P47141	TRUE	-0.948631	1.27692	0.102327	-0.916406	0.987696	0.151312	0.291057	0.523486	0.578107	-0.541817	1.30133	0.154773
2903		P53274		-0.942042	1.27338	0.103009	-0.931259	0.759414	0.234702	-0.156639	0.154834	0.863392	0.154939	0.0734764	0.900194
4021	KEL3	Q08979		1.04607	1.27323	0.103009	-0.312284	0.358402	0.509095	0.153051	0.093519	0.91412	-0.541898	0.551246	0.445798
2630	HLJ1	P48353		1.48991	1.27315	0.103009	-0.326125	0.598466	0.319292	0.763594	0.696694	0.484663	0.0541258	0.0358094	0.949366
1835	YHR122W	P38829		-1.23668	1.27284	0.103012	-1.48788	1.44269	0.0641929	-0.222795	0.336794	0.715192	-1.14134	1.37478	0.13864
1485	PXL1	P36166		1.07236	1.27212	0.103113	0.152145	0.180526	0.714299	NaN	NaN	NaN	NaN	NaN	NaN
981	SEC21	P32074		-0.433047	1.26968	0.103624	-0.335757	1.66483	0.0426009	-0.259238	1.01277	0.356249	-0.154757	0.708005	0.354986
521	CLC1	P17891		-0.553413	1.26761	0.104048	-0.19512	2.67584	0.00739441	-0.247834	1.15316	0.301067	0.151438	1.71773	0.088669
162	CTT1	P06115		-0.89022	1.26514	0.1045	1.05235	1.08713	0.125107	0.116437	0.133371	0.884057	0.399564	0.201821	0.748822
266	GCD1	P09032		-0.829278	1.26536	0.1045	-0.32283	0.829861	0.204003	-1.32541	2.19712	0.101365	-0.374145	1.12628	0.199318
970	TPD3	P31383		-0.679742	1.26484	0.104501	0.550731	2.14678	0.0179719	0.0586801	0.116647	0.896222	0.623607	1.42172	0.131304
1390	VPS21	P36017		-0.589151	1.26336	0.104716	-1.34674	1.49884	0.0576477	-0.271938	1.42712	0.232929	-0.855525	1.60597	0.101713
1543	PDX3	P38075	TRUE	-0.567102	1.26337	0.104716	0.0342236	0.0861579	0.849913	-0.349958	0.862327	0.411383	0.186565	0.33425	0.620264
2670	APT1	P49435		0.598322	1.26296	0.104742	1.4482	1.79082	0.0335834	-0.216842	0.472781	0.611621	1.38652	3.81668	0.00999141
3783	RSC3	Q06639		-0.48246	1.25877	0.105685	-1.07846	2.19328	0.0165979	-0.922463	3.15208	0.0327242	-0.744382	0.820427	0.304492
4079	DAP1	Q12091		-0.485649	1.25805	0.105722	1.18911	1.63716	0.0448084	0.456204	1.29068	0.258888	1.5134	1.90146	0.0703121
2472	YAR1	P46683		0.439719	1.25804	0.105722	0.916868	2.60319	0.00834602	-0.105844	0.213827	0.810223	0.229953	0.629262	0.396608
1125	VMA8	P32610		0.994466	1.25647	0.106033	0.757062	1.743	0.0367631	0.948016	1.45681	0.223236	0.542652	0.966611	0.249261
56	SOD1	P00445	TRUE	-0.332201	1.25442	0.106463	0.528182	2.22293	0.0158798	0.0468225	0.126828	0.888915	0.911965	3.28842	0.0165101
2588		P47137		-1.05769	1.25387	0.106527	-2.87113	2.64989	0.00772785	-0.0839133	0.0889574	0.919169	0.277174	0.19367	0.758457
2341	BNI1	P41832		-1.34148	1.25206	0.106898	-1.77515	3.62983	0.00177201	-0.97296	0.724925	0.469882	-1.47603	3.05513	0.0207018
2754	SEH1	P53011		-1.49533	1.25051	0.10721	-1.18108	1.53844	0.0535925	0.120778	0.0687767	0.939721	-0.358956	0.451714	0.516731
822	ADY2	P25613		-1.40946	1.24905	0.107475	-1.96084	3.82908	0.00135327	-0.00258398	0.00173939	0.998258	-0.592675	1.49341	0.11839
1317	COY1	P34237		-0.859582	1.24885	0.107475	0.155269	0.164693	0.732795	-0.754181	1.05159	0.338457	0.26628	0.410101	0.551631
4297	MRPL23	Q12487	TRUE	-1.17661	1.24773	0.10761	-0.517912	1.16462	0.108195	0.117373	0.127729	0.888564	-0.035603	0.0384394	0.946972
3916		Q08225		-0.439268	1.24782	0.10761	0.0594029	0.150747	0.751731	-0.0854669	0.162944	0.856485	0.390582	1.17423	0.186559
2919	TIM13	P53299	TRUE	-0.614937	1.24618	0.107921	0.155423	0.677145	0.275607	0.281551	0.506526	0.588767	-0.425204	0.903229	0.273261
3925	ZEO1	Q08245		0.422361	1.24589	0.107922	0.745299	2.462	0.0105987	0.569437	1.6291	0.182526	0.101569	0.24897	0.70152
3328	MRPS17	Q03246	TRUE	-1.61484	1.24313	0.108537	-1.38296	2.45279	0.0107482	-0.425329	0.25792	0.773832	-0.970543	1.35807	0.141808
2482	PHO86	P46956		-0.635862	1.24261	0.108595	-1.07695	2.04483	0.0215083	-0.214323	0.370568	0.690163	-0.499035	0.920785	0.265492
1455	SET3	P36124		-1.5	1.24201	0.108672	-2.44332	3.52764	0.00201096	-0.894805	1.16797	0.298316	-2.34731	1.58637	0.104187
2871	ORM1	P53224		-0.624398	1.23844	0.109496	1.65361	2.92191	0.00508224	0.0740066	0.3992	0.669657	0.875828	0.658062	0.382613
1189	NFU1	P32860	TRUE	-0.304712	1.23761	0.10956	-0.198746	1.85092	0.0300489	-0.0843725	0.22162	0.805674	0.0458441	0.173369	0.778469
1350	UTP20	P35194		1.95228	1.23785	0.10956	0.0472078	0.0374636	0.932022	-0.73521	0.367933	0.691788	-1.11987	1.65031	0.0958521
2549	RPC17	P47076		0.730992	1.23463	0.110239	0.173693	0.159196	0.740125	0.298679	0.375903	0.688336	0.0645342	0.100093	0.863423
705	PRE9	P23638		0.376565	1.23195	0.110848	0.194683	0.588989	0.324948	0.397103	1.01094	0.356249	0.151577	0.537442	0.454685
1045	CDC11	P32458		-1.0779	1.22758	0.111883	0.210106	0.360586	0.507038	-0.198433	0.102094	0.904959	0.613328	0.724431	0.34653
2212	VHS2	P40463		1.38898	1.22734	0.111883	1.01664	0.44796	0.429083	0.87507	0.505387	0.589075	0.552422	0.29282	0.658916
2196	TPM2	P40414		-0.424328	1.22667	0.111907	0.268366	0.898777	0.179604	-0.284106	0.820223	0.434681	0.180036	0.36492	0.592197
173	RPS14A	P06367		0.435712	1.22676	0.111907	0.759975	1.38885	0.0708921	NaN	NaN	NaN	0.44139	0.665566	0.37829
1996	ECM1	P39715		1.99285	1.22292	0.112803	NaN	NaN	NaN	-1.26823	0.685234	0.490167	NaN	NaN	NaN
4271	POM34	Q12445		-1.39031	1.2226	0.112812	-0.994921	0.595646	0.321029	-1.09855	1.27424	0.264656	-0.983843	0.896672	0.276241
4429	IGO2	Q9P305		-1.61653	1.21937	0.113429	-1.75952	1.71248	0.0388181	0.33461	0.130595	0.886377	-0.540663	0.431468	0.532258
2356	PSA1	P41940		0.492318	1.21965	0.113429	0.809887	4.32304	0.000709178	0.130078	0.485276	0.603888	0.233438	1.37726	0.138293
563	HNM1	P19807		2.08424	1.21942	0.113429	1.13705	1.52622	0.0548248	NaN	NaN	NaN	NaN	NaN	NaN
1114	STH1	P32597		-1.22166	1.21723	0.113914	-2.06088	3.99447	0.00105988	-0.840015	1.15457	0.301067	-0.607582	0.927067	0.264106
3478	SXM1	Q04175		1.05859	1.21538	0.114323	1.65664	3.01301	0.00438923	0.634398	0.597061	0.529858	0.823284	1.40813	0.133778
3729	BCP1	Q06338		0.872688	1.21313	0.114843	1.53018	0.910298	0.175674	-0.91547	1.29316	0.258237	1.96396	2.12149	0.0517262
2306	MVP1	P40959		0.63502	1.21129	0.115255	-1.51996	1.33377	0.0781156	2.41198	3.74	0.0137343	0.570322	0.508972	0.473328
3186	ARG5,6	Q01217	TRUE	-0.523832	1.20982	0.115567	-1.52782	3.44375	0.00225879	-0.199684	0.375541	0.688336	-0.296713	0.919166	0.266252
2174	ATG3	P40344		-0.735512	1.20582	0.116559	-0.0681615	0.151754	0.75044	0.248129	0.413517	0.657702	-0.0450296	0.0472617	0.934051
288	RPS28A;RPS28B	Q3E7X9;P0C0X0		0.374537	1.20458	0.116754	1.16511	2.74859	0.00661211	-0.111644	0.386076	0.678707	0.753613	3.34589	0.0163562
1785	BRL1	P38770		0.955052	1.20453	0.116754	NaN	NaN	NaN	NaN	NaN	NaN	NaN	NaN	NaN
507	PHO85	P17157		-1.14842	1.20035	0.117806	-0.564082	1.84753	0.0302118	0.762505	2.31017	0.0886531	-0.315374	0.759772	0.329041
3577		Q04867		-1.28125	1.19954	0.11787	-0.0601287	0.0394991	0.929256	-1.48271	1.44424	0.226595	NaN	NaN	NaN
615	VPS1	P21576		-0.389924	1.19966	0.11787	-0.317403	2.51103	0.00970129	0.0631838	0.152207	0.866102	0.0302067	0.118583	0.841699
4140	TIP41	Q12199		-1.16859	1.19696	0.118494	-1.55328	1.14443	0.112395	-0.407752	0.445706	0.633186	-0.866428	0.560432	0.439183
602	SCL1	P21243		-0.267377	1.19573	0.118753	-0.428618	1.05538	0.132939	0.0972457	0.417731	0.652756	0.0581546	0.156411	0.79658
3112	SUR7	P54003		-1.07581	1.19477	0.118937	-1.52618	3.79323	0.00140728	-0.289609	0.545953	0.561864	-2.6346	1.69641	0.0912375
280	TRL1	P09880		1.24665	1.19449	0.118937	-0.581425	0.660539	0.284776	0.177585	0.142562	0.877384	-0.871777	0.833731	0.299213
2385	PAM16	P42949	TRUE	-1.27789	1.19395	0.119008	-0.981626	2.36608	0.0122619	0.0359998	0.0225741	0.978997	0.217982	0.252014	0.698904
3165	CDC55	Q00362		-0.455222	1.19213	0.119429	-0.707444	1.30623	0.0823733	-0.213836	0.58427	0.536893	0.557091	1.56674	0.107185
2257	SYG1	P40528		2.18095	1.19097	0.11967	NaN	NaN	NaN	NaN	NaN	NaN	NaN	NaN	NaN
3901	YOL019W	Q08157		1.34755	1.18977	0.119922	0.878931	0.972753	0.155836	NaN	NaN	NaN	2.07259	2.22619	0.0461861
1299	EDE1	P34216		-0.427387	1.18808	0.12031	0.508456	1.40156	0.0692193	0.113261	0.216507	0.808371	0.27315	0.62547	0.399373
349	HSF1	P10961		-1.60001	1.18617	0.120763	-2.15504	3.56322	0.00194332	-0.592395	1.35407	0.240539	-1.91047	1.99922	0.0617935
2203	COA1	P40452	TRUE	-0.804517	1.18425	0.121218	-2.80094	1.18777	0.103818	-0.224666	0.233914	0.793014	NaN	NaN	NaN
1495	MRPL11	P36521	TRUE	-0.484468	1.18184	0.121813	-1.3749	1.77369	0.0346371	0.43818	1.68921	0.173365	-0.825722	1.12947	0.198659
2525	IML2	P47031	TRUE	-1.40345	1.18119	0.121918	-2.43624	3.70418	0.00158835	0.104849	0.0560974	0.950674	-0.829845	1.48767	0.119205
2501	ATG27	P46989	TRUE	-0.584467	1.17759	0.122853	-1.34613	3.17975	0.00339164	-0.107341	0.171955	0.847673	-1.46581	3.68254	0.0114204
1432	VPS24	P36095		-1.01898	1.17615	0.123101	0.252494	0.278435	0.596437	1.30374	1.50602	0.210352	2.35231	3.55876	0.0128855
1178	GSP1	P32835		2.81763	1.17634	0.123101	NaN	NaN	NaN	NaN	NaN	NaN	NaN	NaN	NaN
3985	SCP1	Q08873		-1.31694	1.17311	0.123884	NaN	NaN	NaN	-0.658074	0.558913	0.552336	NaN	NaN	NaN
470	UBC4	P15731		-1.13312	1.17039	0.124581	-1.92149	0.580525	0.33029	-0.150235	0.44327	0.634624	NaN	NaN	NaN
78	GPM1	P00950	TRUE	0.316986	1.16975	0.124686	2.75097	4.03745	0.000995129	0.0369921	0.101951	0.904959	1.1401	1.60475	0.101847
2508	SSY5	P47002		1.78597	1.16916	0.124773	NaN	NaN	NaN	NaN	NaN	NaN	NaN	NaN	NaN
2494	HIT1	P46973		1.77735	1.16752	0.125164	-1.06268	0.504357	0.382918	NaN	NaN	NaN	NaN	NaN	NaN
2619	FAA4	P47912		-0.700502	1.16637	0.125415	-0.462126	1.34931	0.0760188	-0.382875	1.31664	0.250251	-0.26586	0.772551	0.325363
2612		P47173		-0.792636	1.16481	0.125703	-0.125117	0.136921	0.771665	-0.452489	0.696805	0.484663	0.808266	0.96468	0.249804
204	ADE3	P07245		0.222191	1.165	0.125703	0.661594	3.52779	0.00201096	-0.149304	0.616743	0.519737	0.341383	1.1926	0.181626
259	GPA1	P08539		-1.63775	1.16057	0.126773	-0.436103	1.1288	0.115547	-1.26729	1.40173	0.236067	-0.292284	0.225594	0.719578
4395	MIC10	Q96VH5	TRUE	-0.796924	1.16068	0.126773	-0.727988	3.26332	0.00297147	0.823839	1.76304	0.162342	-0.468217	1.66253	0.0952638
2316	RPL33B	P41056		0.545678	1.1599	0.126886	NaN	NaN	NaN	-0.098557	0.190803	0.831014	2.35676	0.661346	0.380867
215	URA2	P07259		-0.248815	1.15811	0.127246	0.475268	2.97166	0.00469456	-0.408435	1.76979	0.160967	0.0123806	0.044561	0.93674
2889	RRP46	P53256		1.05259	1.15819	0.127246	0.395984	0.558624	0.344693	-0.0120015	0.00563408	0.995591	NaN	NaN	NaN
1982	YHB1	P39676	TRUE	0.222857	1.15754	0.127332	0.681441	3.37822	0.00247808	0.2748	2.71829	0.0501171	0.682621	4.00025	0.00831687
2687	NAS6	P50086		-0.746832	1.15711	0.127377	-0.243567	0.447285	0.429353	-0.312838	0.602893	0.527104	0.0269866	0.0347328	0.951055
2048	POL5	P39985		1.38688	1.15418	0.128157	-0.313654	2.02296	0.0224721	-0.0362611	0.0335659	0.971291	0.00128412	0.000790961	0.999154
1443	DID4	P36108		-0.925443	1.15156	0.128849	-1.08882	1.82542	0.0314333	-0.174115	0.239349	0.788468	-1.02771	1.65147	0.0958132
1251	SNC2	P33328		2.23295	1.14479	0.130789	2.01598	1.34548	0.0765132	NaN	NaN	NaN	1.16712	0.564856	0.435635
1244	CNS1	P33313		0.64251	1.14362	0.131059	2.7566	2.40572	0.011601	0.267894	0.269829	0.767179	0.380701	0.119806	0.840541
157	NOT3	P06102		-0.492414	1.14264	0.131269	-0.187192	0.373293	0.496148	-0.249196	0.45876	0.622926	-0.558427	1.09253	0.209442
1061	HSP150	P32478		-0.675913	1.1384	0.132471	0.299995	0.314488	0.555822	-0.619781	1.67415	0.17436	0.35935	0.416751	0.546775
614	CBP3	P21560	TRUE	-1.16915	1.13622	0.133054	-1.57658	1.16786	0.107675	-0.164861	0.227953	0.798845	-0.686972	0.620993	0.402026
1727	RFC3	P38629		0.435523	1.1323	0.134174	-0.500432	1.09832	0.122397	0.0182819	0.030017	0.973766	-0.606882	0.910426	0.270113
1777	OSH7	P38755		-0.478489	1.13145	0.134351	-0.307252	0.567887	0.338725	-0.35744	0.871025	0.407462	-0.079144	0.141872	0.81413
2989	MRPS12	P53732	TRUE	-2.21355	1.13101	0.134403	-0.0585575	0.0234976	0.95597	-1.26083	0.897341	0.397949	-0.131981	0.131185	0.829547
394	NAT1	P12945		0.775239	1.12989	0.134664	0.71852	1.82141	0.0315938	-0.317554	0.564387	0.547579	0.0850511	0.270584	0.679858
2172	YTA12	P40341	TRUE	-1.06468	1.12955	0.134682	-2.02068	4.63717	0.000518631	-0.372515	1.26212	0.26794	-0.737657	1.12248	0.200206
3384	GAS3	Q03655		0.678144	1.12788	0.135114	-0.07025	0.057761	0.897205	0.17155	0.271835	0.766486	0.225419	0.160558	0.792923
4249	MPD1	Q12404		-1.10491	1.12459	0.136056	-2.0801	2.31055	0.013576	-0.969043	0.968186	0.372044	-1.18705	0.749818	0.333391
2028	RPS26B	P39939		0.254321	1.12401	0.136151	0.530871	5.58763	0.000190106	0.0181417	0.0524332	0.956256	-0.0438433	0.118664	0.841699
4414	SEY1	Q99287		-0.61975	1.12353	0.136215	-0.655791	1.41643	0.0675185	-0.386375	0.800488	0.441518	-0.36491	0.89522	0.27697
2368	ZIM17	P42844	TRUE	-1.68479	1.12315	0.136246	-2.08797	0.978527	0.153968	-1.25546	0.858239	0.41344	-1.19868	0.778029	0.323652
2264	EMC5	P40540		-1.15899	1.11977	0.137225	-0.517913	0.398691	0.47185	0.0934725	0.101092	0.905302	0.193307	0.131625	0.829009
1016	IMP2	P32351		-1.10431	1.11926	0.1373	0.205506	0.303354	0.567877	-0.506066	0.450256	0.62861	-0.212585	0.123967	0.837648
1334	PEX5	P35056		-1.11959	1.11673	0.138014	-0.120508	0.0489154	0.913243	-2.35752	2.14295	0.105599	0.699349	0.914545	0.268138
1939	END3	P39013		-0.66709	1.11176	0.139514	-0.479614	1.6328	0.0450875	0.118004	0.131881	0.885952	-0.334046	1.5633	0.107899
77	TPI1	P00942	TRUE	0.303764	1.10999	0.139995	1.63901	3.36693	0.00252649	0.203127	0.631931	0.512343	0.109188	0.13197	0.829009
4195	MAM3	Q12296		-0.771767	1.10772	0.14055	-1.04434	1.41479	0.0677062	0.495268	0.634297	0.51062	-0.726176	0.945348	0.257363
4266	RDI1	Q12434		-0.244672	1.10777	0.14055	-0.904404	3.07708	0.00399919	-0.240254	0.890434	0.401788	-0.261618	1.01677	0.232345
2688	MIC26	P50087	TRUE	-0.811116	1.10665	0.140807	-1.0622	2.71785	0.00698798	0.22569	0.498081	0.59403	-0.726037	1.56787	0.107043
1468	TFA2	P36145		0.672397	1.10531	0.141152	-1.76785	0.469801	0.410259	-0.0217891	0.0116877	0.987465	-1.80526	1.49411	0.11839
2666	RPL37A	P49166		0.643924	1.10438	0.141365	0.143835	0.721166	0.252954	0.208296	0.283566	0.756009	-0.654506	1.64108	0.0970514
1048	ACP1	P32463	TRUE	-0.449116	1.10231	0.141951	-0.179837	0.369246	0.499747	-0.0499301	0.14755	0.870385	0.702286	1.62898	0.0985833
1755	OSH3	P38713		-0.941849	1.10192	0.141986	-2.55668	2.40086	0.0116712	-0.499175	0.578332	0.540224	-0.910098	0.720907	0.348216
3151	ARP4	P80428		-0.549602	1.10165	0.141986	-1.08933	2.19928	0.016498	-0.0213451	0.0797937	0.930163	-0.745806	0.889376	0.278363
1209	RPS0A	P32905		3.05091	1.09986	0.142483	NaN	NaN	NaN	1.55092	0.458431	0.622926	NaN	NaN	NaN
1179	GSP2	P32836		0.271461	1.09897	0.142686	0.785791	4.51299	0.000565789	-0.19415	0.612151	0.521597	0.165307	0.700266	0.358834
3673	YLR407W	Q06070		1.34778	1.09849	0.142754	NaN	NaN	NaN	NaN	NaN	NaN	NaN	NaN	NaN
1631	UBP14	P38237		-0.719414	1.0976	0.142957	0.925571	2.33648	0.0129406	-0.342647	0.651908	0.507954	1.34738	3.58173	0.0128764
779	RNQ1	P25367		-0.44654	1.09659	0.143201	-0.153805	0.254147	0.622971	0.0232224	0.031524	0.972505	0.328139	0.535382	0.455808
3788	TSR2	Q06672		0.903277	1.09516	0.143582	NaN	NaN	NaN	0.268203	0.257671	0.773934	0.88521	0.544739	0.450441
613	REB1	P21538		-0.341674	1.09335	0.144006	-0.127622	0.121546	0.796395	-0.296856	0.794722	0.442825	0.123574	0.117905	0.842713
759	ERG4	P25340		0.855378	1.09306	0.144006	-0.0153785	0.0311169	0.94305	1.07194	2.47102	0.0724057	-0.467036	0.647049	0.387494
1328	BMH2	P34730		1.05122	1.09318	0.144006	1.38377	2.36186	0.012362	1.34465	2.23532	0.0978213	0.718821	0.999813	0.23897
3919	NBA1	Q08229		0.620274	1.09265	0.144052	0.686273	1.07196	0.128778	0.0588264	0.0579913	0.948835	-0.507628	0.623703	0.400399
3499	PDS5	Q04264		-1.46137	1.09113	0.14441	-1.9346	2.19928	0.016498	-0.679668	0.355691	0.697381	-0.613147	1.37556	0.13854
4008	RKM1	Q08961		1.40449	1.09103	0.14441	NaN	NaN	NaN	NaN	NaN	NaN	1.45909	0.992337	0.24162
2043	VAC8	P39968		-0.700241	1.09039	0.144441	-0.788258	2.059	0.0210201	-0.264676	0.323343	0.725345	-0.219604	0.537615	0.454685
3853	NOP6	Q07623		0.686973	1.09047	0.144441	-0.188308	0.391159	0.478515	-0.712601	1.09696	0.320624	-0.384726	0.764177	0.327455
3210	YSA1	Q01976	TRUE	-0.329868	1.09005	0.144465	0.561508	1.45092	0.0631453	0.010849	0.0292453	0.974911	0.435276	0.68268	0.367858
1950	CAJ1	P39101		-0.418666	1.08859	0.144861	-0.00383902	0.00575221	0.989066	-0.211287	0.408025	0.663219	-0.409498	0.867266	0.285498
1716	YPT31	P38555		-1.01714	1.08365	0.146425	-0.663302	1.47667	0.0602045	-0.176998	0.20296	0.81751	-0.93182	0.844337	0.294389
3561	RSE1	Q04693		2.55409	1.0823	0.146788	1.9018	5.67347	0.000190106	2.53525	1.07599	0.32854	NaN	NaN	NaN
814	PBN1	P25580		-1.87528	1.0812	0.146979	-0.61501	0.771931	0.229164	-1.55398	0.710732	0.477336	0.205511	0.155659	0.797187
3523	GRH1	Q04410		-0.987978	1.08142	0.146979	-1.03896	1.32144	0.0799865	-0.108529	0.124568	0.889861	0.0469985	0.053781	0.92587
110	RPO21	P04050		-0.336713	1.0804	0.147065	-0.495927	0.826576	0.205196	-0.107722	0.2986	0.744115	-0.323376	0.518904	0.465931
421	RPL30	P14120		0.795034	1.08064	0.147065	0.434803	0.619365	0.307576	0.532279	0.665854	0.500537	0.174229	0.505073	0.47477
1096	RPN2	P32565		-0.283076	1.07976	0.14719	-0.593926	2.8571	0.00557425	-0.233641	0.72704	0.469882	-0.302265	1.52184	0.114876
2020	PTI1	P39927		-1.451	1.07818	0.147361	-2.31198	1.15797	0.109427	-0.45521	0.318967	0.730135	-1.33828	0.709855	0.354311
1126	RML2	P32611	TRUE	-0.860568	1.07842	0.147361	-2.84461	2.12428	0.0186629	0.499052	1.0952	0.320624	-1.22082	1.28775	0.157939
92	TUB2	P02557		-0.206019	1.07879	0.147361	0.301894	0.892883	0.181477	-0.286173	1.46051	0.223141	0.365321	1.13968	0.196599
4226	PST1	Q12355		1.79016	1.07857	0.147361	-1.25466	0.82841	0.204569	-0.291762	0.126168	0.889265	0.0322862	0.0194953	0.973492
1818	GEP4	P38812	TRUE	-1.79742	1.07699	0.147676	-3.24819	1.92266	0.0266889	0.0105	0.0140186	0.9847	-1.15249	1.39484	0.135666
2699	RPA14	P50106		0.402976	1.07672	0.147676	2.03533	2.02565	0.0223896	NaN	NaN	NaN	NaN	NaN	NaN
1038	ASF1	P32447		0.480628	1.07146	0.149381	0.595191	1.69082	0.0404397	-0.34199	0.476508	0.609251	0.36536	0.859005	0.288484
188	SNF1	P06782		-0.343419	1.06859	0.15028	-0.66429	2.25112	0.0151411	-0.0371909	0.049408	0.959674	-0.145875	0.168937	0.784497
3515		Q04371		-0.292465	1.06782	0.150452	0.571136	1.92491	0.0265679	-0.222737	0.415664	0.655516	0.449855	0.86787	0.285491
2381		P42942		0.76505	1.06597	0.151001	-0.345889	0.298197	0.573006	0.665156	2.18011	0.10214	0.374003	0.246503	0.703691
3608	SWR1	Q05471		0.895513	1.06495	0.151264	0.818666	1.30632	0.0823733	NaN	NaN	NaN	0.0455194	0.067603	0.909395
1376	MRPL38	P35996	TRUE	-1.1662	1.06423	0.15142	-1.41566	2.28387	0.0142253	0.042789	0.0372791	0.969582	-1.74667	2.68899	0.0281889
3563	ARG7	Q04728	TRUE	0.618049	1.06378	0.151482	0.80671	1.17624	0.106046	-0.00623178	0.00693032	0.994205	0.0381193	0.0406986	0.943327
3413	GIR2	Q03768		-0.957937	1.06303	0.151558	-1.08909	2.38553	0.0119634	-0.888391	0.999033	0.361253	-1.0428	2.12243	0.0517262
1260	TFC4	P33339		1.48329	1.06315	0.151558	0.9301	0.444286	0.431415	-0.527395	0.245768	0.78396	0.0360961	0.0116728	0.983059
3303	SVL3	Q03088		-1.29181	1.0621	0.151698	-1.47498	1.40978	0.0682224	-0.0745363	0.0464709	0.962595	-1.22195	1.04142	0.224814
1339	SPT7	P35177		1.22862	1.06234	0.151698	-0.502532	0.649665	0.291037	2.43956	2.17582	0.102588	1.50489	2.94365	0.0218781
3319	RLI1	Q03195		0.496204	1.0608	0.152057	0.438718	2.06988	0.0206069	-0.130262	0.227899	0.798845	-0.525823	1.0083	0.235807
2422	YFR006W	P43590		-0.373833	1.05874	0.152686	0.0554428	0.161791	0.737042	0.30588	1.02941	0.347627	0.415839	0.831646	0.300262
3170	SSL2	Q00578		-1.03194	1.05824	0.15277	-1.74691	1.88267	0.0284589	-1.0552	2.28919	0.0892346	-1.4807	1.60865	0.101223
4098	GET4	Q12125		-0.977904	1.05522	0.153739	-0.828967	2.14687	0.0179719	-0.538517	1.39163	0.237372	-1.12395	2.34669	0.0406173
1763	GOS1	P38736		-0.602621	1.05256	0.154589	0.156229	0.252668	0.624547	0.09271	0.123816	0.889861	0.644997	3.25656	0.0168862
3261	SWP1	Q02795		-0.796537	1.0512	0.154982	-1.41083	1.91354	0.0270517	0.0241556	0.022237	0.97912	-0.547403	1.08459	0.211174
2087	RGI1	P40043		-0.891943	1.04819	0.155957	-0.131312	0.100496	0.829317	0.485281	0.512418	0.584866	0.502903	0.608954	0.406889
201	TOM70	P07213	TRUE	-0.135313	1.04794	0.155957	-0.496874	3.09708	0.00387112	-0.0677261	0.818393	0.434681	-0.555944	1.47232	0.121527
4417	ODC2	Q99297	TRUE	0.759295	1.04495	0.156937	0.895804	2.31681	0.013413	0.232888	0.461079	0.621038	-1.0407	0.770592	0.32575
2252	YRB2	P40517		1.05768	1.0439	0.157222	0.352129	1.45584	0.0626541	0.311256	0.240634	0.786942	0.337444	0.80329	0.312688
830	BUD23	P25627		0.810634	1.04241	0.157665	0.757805	1.38008	0.0720231	-0.799932	0.889685	0.401788	-0.729386	0.268887	0.681366
105	URA3	P03962		0.804469	1.04102	0.157977	NaN	NaN	NaN	0.243642	0.320896	0.727598	5.5032	1.61682	0.100258
2894	VOA1	P53262		0.907468	1.0412	0.157977	-0.322461	0.43507	0.43963	0.584302	0.615453	0.520609	-0.111168	0.130366	0.830447
595	NUP1	P20676		-0.768499	1.03831	0.15887	-0.256731	0.226622	0.655939	-1.28195	0.943221	0.382707	0.150153	0.179169	0.773792
953	NAM7	P30771		-1.2296	1.0379	0.158924	-0.296827	0.239393	0.640912	-1.13749	1.16348	0.299202	-0.0638137	0.0471876	0.934051
2594	ADO1	P47143		0.293569	1.03727	0.159057	1.43342	3.7313	0.00152552	0.158741	0.400186	0.669283	0.837538	2.73285	0.0278205
1266	IXR1	P33417		-1.47636	1.037	0.159058	-1.33162	2.40638	0.011593	-0.175298	0.085875	0.923088	NaN	NaN	NaN
763	STE50	P25344		-0.837978	1.0361	0.159291	-2.98898	1.95107	0.0253341	-0.157141	0.341764	0.710815	NaN	NaN	NaN
3540	GIM5	Q04493		0.505387	1.03544	0.159438	1.70727	2.17258	0.0171867	-0.106494	0.148122	0.87029	1.25661	1.43804	0.128781
4326	RPL21B	Q12672		-0.723628	1.03067	0.16095	0.406987	0.220972	0.66288	-0.672904	0.680863	0.492543	0.00364542	0.00148393	0.99821
1277	TRM2	P33753		1.20651	1.0307	0.16095	-0.753158	0.444832	0.431164	0.754338	0.372252	0.690163	-0.137705	0.0599516	0.918806
1460	KAE1	P36132		2.09829	1.03054	0.16095	0.438001	0.273587	0.600838	0.71401	0.269628	0.767179	1.05935	0.73348	0.34242
283	SWI6	P09959		-0.809141	1.03008	0.161026	-1.45507	1.43905	0.0646682	-0.565649	0.700841	0.481889	-0.633492	0.678805	0.370507
3146	DAD3	P69850		-1.18335	1.02953	0.16113	0.452498	0.233135	0.648188	NaN	NaN	NaN	-0.680173	0.402678	0.557252
353	SEC7	P11075		-0.445541	1.02802	0.161593	-0.651371	4.21009	0.000789925	-0.183728	0.502016	0.591534	-0.710832	2.86114	0.0243624
700	STE11	P23561		-1.68367	1.02633	0.162128	-1.15942	1.2877	0.0854832	-0.506225	0.272718	0.765954	-0.239862	0.18926	0.761853
1868	LNP1	P38878		-0.574101	1.02592	0.162181	-0.354835	0.626714	0.30307	-0.0547714	0.073802	0.935428	-0.331769	0.636718	0.393091
498	PFK2	P16862	TRUE	-0.317174	1.0251	0.162389	0.648784	2.6	0.00839177	0.0479527	0.108947	0.898935	0.213518	0.603697	0.410501
3068	NRK1	P53915	TRUE	1.11814	1.02464	0.162462	NaN	NaN	NaN	NaN	NaN	NaN	NaN	NaN	NaN
781	LSB5	P25369		-0.505596	1.02372	0.162708	-0.250021	1.56638	0.0509588	-0.292267	0.654464	0.506208	-0.112278	0.234675	0.712326
3219	MEH1	Q02205		-0.911715	1.02334	0.162752	-0.903346	1.15168	0.110827	0.209608	0.09875	0.908323	0.0618062	0.0886407	0.878737
1555		P38109		-0.646585	1.02227	0.163056	-1.14686	1.45144	0.0631013	-0.308089	0.404881	0.666029	-0.249927	0.24649	0.703691
3610	FCF1	Q05498		1.16799	1.01915	0.164132	1.13074	0.844186	0.198811	NaN	NaN	NaN	NaN	NaN	NaN
2098	GET2	P40056		0.780995	1.01881	0.164163	-0.188496	0.385536	0.483951	0.321535	0.510015	0.586259	-1.3988	1.53916	0.111915
3588	SCW10	Q04951		-1.05602	1.01668	0.164781	-2.99134	4.05942	0.000954788	0.673131	0.878245	0.405375	-1.33272	1.83092	0.0766357
393	SNF4	P12904		-0.734633	1.01665	0.164781	-1.27877	3.24796	0.00303205	-1.02479	1.1965	0.288872	-2.84483	2.50563	0.0344486
564	UBR1	P19812		-1.97792	1.01541	0.165155	-1.78395	1.96604	0.024711	0.34479	0.44013	0.637449	-0.253527	0.781845	0.321631
2734	YKE2	P52553		0.561259	1.01479	0.16529	0.565749	2.19032	0.0166468	0.340583	0.488796	0.601895	0.198999	0.353002	0.603092
89	RPP2B	P02400		0.573572	1.0129	0.16591	1.29035	3.2062	0.0032498	-0.0610743	0.109265	0.898932	0.949604	2.52258	0.0342359
2165	ELO3	P40319		0.472694	1.01086	0.166591	1.13976	2.70374	0.00710679	0.171924	0.294793	0.746831	0.897032	1.973	0.0643716
135	RPP2A	P05319		0.455697	1.00726	0.16788	0.898376	3.51621	0.00203746	0.1517	0.446514	0.633067	0.299822	0.699412	0.35912
1807	NMD2	P38798		-1.68107	1.00636	0.168027	-3.48181	2.8955	0.00528611	-0.0116234	0.00490042	0.99664	-0.939602	1.06422	0.216446
1472	BET3	P36149		2.51025	1.00648	0.168027	NaN	NaN	NaN	2.25597	1.00811	0.357212	1.94741	2.51068	0.034309
2088	TDA2	P40045		-0.670878	0.999375	0.170647	-0.474033	0.507728	0.380611	-1.11278	2.00461	0.123485	NaN	NaN	NaN
1695	MIC12	P38341	TRUE	-1.40269	0.998716	0.170804	-0.765447	2.01776	0.0226786	0.0352082	0.0167594	0.982653	0.504594	1.35096	0.143245
1679		P38321		-1.31558	0.998267	0.170847	-1.62317	4.34046	0.000706346	0.23701	0.25085	0.780324	-0.448087	2.00833	0.0607752
2223	NUP159	P40477		-0.577884	0.998086	0.170847	-0.114568	0.168308	0.728915	-0.214294	0.331245	0.718405	-0.209554	0.562516	0.437534
1331	TSA1	P34760		0.418891	0.997491	0.170979	0.748766	2.64871	0.00774134	0.179598	0.371846	0.690163	0.428638	1.67314	0.0938998
2198	RPC10	P40422		0.959897	0.995694	0.171585	0.119655	0.0745193	0.869611	1.23747	2.55199	0.0639817	0.993228	1.18988	0.182333
4035	VPS68	Q12016		-0.983438	0.994691	0.171879	-2.26837	1.58518	0.0493463	NaN	NaN	NaN	NaN	NaN	NaN
1319	ZRT3	P34240		0.725811	0.994182	0.171978	-1.14384	1.96477	0.0247506	-0.0358014	0.04861	0.960176	-0.669027	1.02353	0.230019
1438	YKL023W	P36103		-1.2451	0.993898	0.171988	2.73692	1.41394	0.0677386	1.69999	0.918198	0.390912	2.82589	1.5133	0.115722
3216	NUP49	Q02199		-0.923261	0.993202	0.172161	-0.411241	0.680762	0.273795	-0.180967	0.205754	0.816413	-0.0497456	0.0407003	0.943327
2541	NUP192	P47054		0.893725	0.992209	0.172453	0.578934	0.620295	0.307029	-0.282146	0.614286	0.520609	-0.615972	1.95938	0.0652683
3288	HOS3	Q02959		-0.723508	0.99125	0.172628	-0.849018	1.20751	0.0997488	-0.526243	0.683335	0.490844	-0.210529	0.220462	0.724799
3884	LOT6	Q07923		-0.63748	0.991508	0.172628	-1.72881	1.23231	0.0948571	-1.00727	0.969859	0.372044	NaN	NaN	NaN
1097	SMI1	P32566		0.485861	0.990916	0.172658	0.442688	1.68612	0.0407884	0.37519	0.960064	0.375305	-0.245237	0.318096	0.635542
93	HSP82	P02829		0.478815	0.990056	0.172876	0.372328	1.68306	0.0410545	0.0135584	0.0231335	0.978546	0.0634761	0.1758	0.77599
3794	YCG1	Q06680		3.32701	0.989853	0.172876	-0.32661	0.0832412	0.854893	2.45033	0.698364	0.483907	NaN	NaN	NaN
3927	ALR1	Q08269		-1.07349	0.989364	0.172968	-0.66984	0.634566	0.299693	NaN	NaN	NaN	-0.140669	0.17962	0.773283
4240	DGK1	Q12382		1.29451	0.988869	0.173063	0.245428	0.127467	0.78701	NaN	NaN	NaN	-0.0629334	0.0258546	0.963804
2891	MDR1	P53258		-1.56763	0.987271	0.173597	-3.71152	3.83506	0.00135327	-0.0490694	0.0344092	0.971291	-0.799337	1.52612	0.114379
3155	ATP18	P81450	TRUE	-0.542328	0.985886	0.174049	-0.240074	0.276984	0.597329	0.0553465	0.0484817	0.960176	0.912624	2.68024	0.0284488
1830	COX23	P38824	TRUE	-1.51187	0.98536	0.174157	-1.00557	1.83249	0.0310541	-0.152024	0.151475	0.866892	0.321437	0.239481	0.709843
1406	SNU114	P36048		-1.16639	0.984117	0.174553	-0.807845	1.78319	0.03402	-0.762203	1.61341	0.184488	-0.576501	1.81545	0.078446
196	SPT3	P06844		1.53977	0.982803	0.174978	-0.245365	0.171739	0.724271	-0.727117	0.462696	0.6196	NaN	NaN	NaN
4125	LEU9	Q12166	TRUE	1.53996	0.982418	0.175029	3.52186	1.64764	0.0439801	-0.231596	0.101616	0.905004	NaN	NaN	NaN
4084	FAL1	Q12099		-1.38787	0.982109	0.175051	-0.398489	0.357297	0.510059	NaN	NaN	NaN	-0.911567	0.511017	0.471869
2825	MMS2	P53152		-0.319958	0.981331	0.175261	0.217209	0.240296	0.639981	0.025394	0.0380206	0.969063	0.31095	0.378859	0.57865
1641	IST2	P38250		-0.571773	0.980678	0.175421	-0.710528	3.35892	0.00255666	-0.377837	0.843864	0.420895	-0.124804	0.203026	0.747902
3414	ENT5	Q03769		-0.794674	0.979971	0.175523	-0.694301	1.6353	0.044918	0.289032	0.394802	0.673625	-0.500906	1.33	0.147407
3038	UBP10	P53874		0.772728	0.979658	0.175523	-0.0499649	0.0359501	0.934742	-0.259093	0.253206	0.778491	-1.29068	1.96175	0.0651659
1290	LTV1	P34078		1.31614	0.979743	0.175523	1.06706	1.37977	0.07204	-0.562659	1.80848	0.156412	1.1293	0.966598	0.249261
1025	SAC1	P32368		-0.499027	0.979292	0.175567	-0.833045	2.1126	0.0190388	0.0263972	0.0318226	0.972505	-0.602873	1.65522	0.0954974
3097		P53960		-0.738502	0.976718	0.176093	-1.0388	2.3845	0.0119634	-0.0650115	0.084271	0.924536	-0.350842	0.508333	0.473633
2324	BUD6	P41697		-0.635409	0.97692	0.176093	-1.18845	2.13638	0.0182652	-0.132517	0.124163	0.889861	-0.066267	0.108398	0.852091
1876	RPN10	P38886		-0.477532	0.977326	0.176093	1.46166	1.82486	0.0314513	-0.366111	0.71244	0.476833	1.29031	1.38142	0.137862
3157	TIM10	P87108	TRUE	-0.30433	0.9769	0.176093	-0.678345	2.40898	0.0115335	0.947209	3.76019	0.0134304	-0.40044	0.616807	0.403937
2986		P53729		0.685077	0.976963	0.176093	1.55118	1.86903	0.0291539	-0.318453	0.401377	0.669283	1.74574	3.03846	0.0209232
1373	BDF1	P35817		-0.46305	0.97402	0.177086	-0.580236	0.530442	0.363676	-0.707527	1.10305	0.32056	-0.86573	1.00163	0.238345
50	TDH1	P00360	TRUE	0.188951	0.972976	0.177409	2.41051	2.20189	0.0164352	0.427866	2.8953	0.0437341	1.09707	0.801407	0.313346
2933	COQ6	P53318	TRUE	-2.62975	0.972351	0.177541	0.30778	0.373851	0.495674	-2.39451	0.932845	0.384907	-0.282175	0.198678	0.752371
689	YCK1	P23291		-0.738977	0.972142	0.177541	-1.12142	2.59392	0.00846252	-0.521088	0.593188	0.532493	-0.636621	1.64904	0.0959486
648	VMA4	P22203		0.176773	0.970105	0.178272	0.537993	1.24571	0.0923952	-0.177745	1.57068	0.196284	0.1481	0.2662	0.683347
4197		Q12298	TRUE	-1.82795	0.969494	0.178418	-2.3493	2.87047	0.0054668	-1.51708	0.990616	0.363442	-0.758511	1.06504	0.216213
4224	ATP14	Q12349	TRUE	-0.561139	0.968416	0.17868	-0.237405	0.495579	0.389664	-0.352435	0.624675	0.517393	0.228891	0.987585	0.242805
379	BAR1	P12630		0.857363	0.968349	0.17868	-0.100638	0.110912	0.812767	0.916949	3.14734	0.0327242	-0.945166	1.21865	0.174749
2887	UTP22	P53254		0.334492	0.967713	0.178838	0.0482745	0.119939	0.798875	-0.0614038	0.100853	0.905302	-0.229324	0.496691	0.480709
4219	HAT1	Q12341		-0.706227	0.965878	0.17949	0.62175	0.633353	0.300206	-1.46645	1.39628	0.236409	0.272436	0.222863	0.722214
1268	SPC29	P33419		-1.42948	0.965507	0.179539	-1.80391	2.49804	0.0099493	NaN	NaN	NaN	-0.72513	0.430552	0.532636
2759	TAF6	P53040		-0.987742	0.964746	0.179749	-1.05175	1.9996	0.0232965	0.0268188	0.0247484	0.978546	-0.361097	1.07547	0.213343
3905	SIL1	Q08199		-1.22167	0.962636	0.180519	-0.980705	0.844521	0.198735	-0.651533	0.363202	0.692015	-1.07268	0.719233	0.34867
3934	NOP8	Q08287		2.09125	0.9619	0.18072	0.908954	0.743434	0.242305	0.491398	0.161904	0.857424	-0.244431	0.123326	0.838161
2333	POP1	P41812		-1.2906	0.959697	0.181533	-0.077527	0.0700303	0.877213	-1.16284	0.718569	0.473087	-0.25555	0.17997	0.772954
2792		P53100		-1.14077	0.959032	0.181706	-2.57129	2.85281	0.00558542	-0.755122	0.503683	0.59044	-0.569423	0.771761	0.325363
703	PPH22	P23595		-0.691278	0.958637	0.181766	-0.533621	1.71261	0.0388181	-0.182348	0.156235	0.862377	-0.116015	0.0979963	0.866683
2744	EXG2	P52911	TRUE	0.828744	0.955795	0.182853	-0.877816	0.55823	0.344885	NaN	NaN	NaN	-0.118193	0.0603001	0.918699
4114	GET3	Q12154		0.307245	0.954485	0.183298	0.313406	1.59806	0.0481871	0.114057	0.286698	0.7554	-0.0268035	0.0275701	0.961281
3507	GYL1	Q04322		-1.64756	0.953059	0.183795	-0.888793	1.12562	0.116041	-0.295649	0.351143	0.702222	-0.197454	0.218498	0.72724
2436	SAP155	P43612		-1.29208	0.948794	0.185501	-1.44184	3.95844	0.00111865	-1.16613	2.17339	0.102588	-0.62976	1.34871	0.143482
1247	DUT1	P33317		-1.27748	0.947168	0.185874	1.66233	1.62716	0.0455559	-2.31842	1.79813	0.157682	0.834898	0.506506	0.474317
3178	APM1	Q00776		-0.649767	0.94723	0.185874	-1.16753	1.96508	0.0247493	0.132045	0.156312	0.862377	-0.258075	0.37076	0.586116
210	CBP6	P07253	TRUE	-0.639431	0.947458	0.185874	-0.928496	1.093	0.123638	0.504632	1.36723	0.239652	0.0359325	0.0448174	0.93674
3209	RPT6	Q01939		0.374941	0.946745	0.185947	0.284713	0.998622	0.147859	0.26648	0.732618	0.4678	0.21544	0.325787	0.627891
257	ERG20	P08524		0.160678	0.945841	0.186227	1.27959	6.23587	0.000184285	0.0570431	0.251005	0.780324	0.845682	2.71935	0.0280515
255	NUC1	P08466	TRUE	-0.46537	0.943296	0.187213	-1.37656	3.06655	0.00406005	0.22393	0.287404	0.754738	-0.731915	1.85339	0.0753119
1778	TCD1	P38756	TRUE	1.63212	0.942903	0.187274	-1.50575	1.97836	0.0242372	0.913858	0.501022	0.592117	-2.79118	3.46797	0.0143588
3599	BCH1	Q05029		-0.944016	0.942609	0.187293	-0.114691	0.100587	0.829317	0.532643	0.932435	0.384907	0.621084	0.893221	0.277605
3835	BRE1	Q07457		-1.13346	0.942356	0.187294	-0.336591	0.770907	0.229358	-1.14083	1.03138	0.347627	-0.674746	1.33763	0.145884
2562	MDE1	P47095		0.520333	0.941995	0.187342	0.0234561	0.0172803	0.968066	0.0269699	0.0302231	0.973624	-0.30285	0.249763	0.70109
3457	YHM2	Q04013	TRUE	-0.332977	0.941103	0.187619	-0.362617	0.647564	0.292342	-0.481055	2.33567	0.0860875	-1.02722	2.7125	0.0280515
3081	NST1	P53935		0.99443	0.937709	0.188982	-0.76017	0.557279	0.345399	NaN	NaN	NaN	-0.64107	0.533102	0.457278
1933	STT3	P39007		0.764035	0.928336	0.192994	-0.233579	0.192917	0.698457	1.07629	2.46014	0.0737452	-0.348037	0.2565	0.693524
1077	NUP2	P32499		0.20909	0.927341	0.193326	0.627712	6.08891	0.000190106	0.0715742	0.438394	0.638597	0.23659	1.07964	0.212354
256	RPB2	P08518		-0.593989	0.926696	0.193502	-0.324228	0.835899	0.201932	-0.311481	0.532964	0.572854	-0.164021	0.240639	0.708805
4124	ATP16	Q12165	TRUE	-0.82646	0.926111	0.193651	-1.0905	1.17072	0.107068	1.07428	1.92652	0.136446	-1.11037	0.701439	0.358075
3938	TMC1	Q08422		1.16533	0.924974	0.194047	NaN	NaN	NaN	NaN	NaN	NaN	NaN	NaN	NaN
1522	CCL1	P37366		0.734283	0.922166	0.195194	-1.10107	1.5565	0.0519397	0.215572	0.162822	0.856485	-0.995074	1.79467	0.080708
3956	YOR238W	Q08634		-0.376835	0.918021	0.196953	-1.43409	1.23043	0.0952237	-0.175141	0.32266	0.725345	0.05304	0.0430192	0.938976
1279	NPL4	P33755	TRUE	-1.16046	0.915493	0.197989	-0.656024	0.776161	0.227462	-0.14411	0.100747	0.905302	0.237822	0.36935	0.587235
1091	SPT16	P32558		-0.421329	0.915071	0.198068	-0.240859	1.1127	0.11908	-0.629178	1.94544	0.135265	0.129764	0.384771	0.572629
1987	POM152	P39685		-0.644139	0.913894	0.198492	-1.44306	4.31557	0.000709178	-0.334386	0.598581	0.529078	-1.46919	3.31472	0.0165101
927	HRR25	P29295		-0.919963	0.91286	0.198651	-0.838755	1.08463	0.125667	-0.952617	1.05493	0.336687	-0.581052	0.878909	0.280969
3441	RUB1	Q03919		-0.914045	0.912801	0.198651	NaN	NaN	NaN	-1.21102	1.38825	0.237839	NaN	NaN	NaN
4038	MDN1	Q12019		0.655441	0.913244	0.198651	1.01852	2.58498	0.00858243	0.192814	0.214049	0.810223	0.792285	1.08239	0.21154
4396	SRN2	Q99176		-0.962215	0.9125	0.198675	NaN	NaN	NaN	-1.65118	2.02655	0.119761	NaN	NaN	NaN
2275	EPS1	P40557		-0.733842	0.911855	0.198857	-0.422048	0.568683	0.338343	-0.757803	1.89719	0.141434	0.0866957	0.0649052	0.913369
1074	NHP2	P32495		1.57836	0.911165	0.199059	1.60134	2.35974	0.0124124	0.16001	0.0632301	0.945092	0.964684	1.25545	0.165755
1499	MRPL28	P36527	TRUE	-0.507209	0.910613	0.199199	NaN	NaN	NaN	-0.756271	0.434235	0.641198	1.0846	0.502458	0.476931
3163	RHO3	Q00245		0.570473	0.909747	0.199483	0.343591	0.600983	0.317673	-0.0416451	0.0309922	0.973183	-0.501571	0.476944	0.496064
3527	CAB1	Q04430		0.776293	0.908309	0.200031	NaN	NaN	NaN	0.303121	0.294929	0.746831	1.13703	0.314298	0.63893
2679	HSH155	P49955		-1.02624	0.907817	0.200143	-2.08711	2.47981	0.0102583	-1.27814	1.62992	0.182526	-1.07321	0.921119	0.265492
2288	YIR035C	P40579		1.16707	0.906051	0.200845	-1.05282	0.971143	0.156286	0.326397	0.200697	0.820094	-2.42795	2.22221	0.0461861
377	WHI2	P12611		-0.917818	0.904607	0.201399	-1.30606	2.02183	0.0225119	-1.62239	1.63688	0.182526	-0.399971	0.262224	0.687661
542	DAP2	P18962		-1.01549	0.904205	0.201471	-0.752642	0.746783	0.240967	-0.842202	0.523049	0.578107	-0.226496	0.226043	0.719578
3821	PUN1	Q06991		1.24583	0.89851	0.204014	-3.41854	2.10959	0.0191445	NaN	NaN	NaN	-1.75973	0.843113	0.294975
1680	MCX1	P38323	TRUE	-1.39435	0.897661	0.204297	-2.52242	3.23037	0.00312514	-1.96231	1.40519	0.236067	-2.51925	3.15193	0.0185481
3479	UTP5	Q04177		0.508099	0.895617	0.205144	0.404541	0.304455	0.566621	0.272802	0.215629	0.808648	NaN	NaN	NaN
335	SSA1	P10591		0.150155	0.89496	0.205339	0.716821	4.86685	0.000409707	0.100189	0.605601	0.525836	0.395517	2.94403	0.0218781
506	SAC7	P17121		-0.592558	0.8938	0.205772	-1.6279	1.60982	0.0470007	0.219383	0.280433	0.756812	-0.931228	1.2305	0.171656
1015	KNS1	P32350		0.981521	0.892184	0.206421	NaN	NaN	NaN	-0.186609	0.187191	0.832999	NaN	NaN	NaN
2703	SAM37	P50110	TRUE	-1.19536	0.891669	0.20655	-1.85425	1.13093	0.115234	-0.328384	0.153419	0.864024	NaN	NaN	NaN
4165	LCB4	Q12246		0.934536	0.891354	0.206582	-0.779962	0.975837	0.154797	-0.202486	0.39079	0.675956	-0.498345	0.612186	0.40557
3195	NPL3	Q01560		0.38537	0.890226	0.207003	0.610505	2.42071	0.0113203	-0.0668969	0.109921	0.898932	0.25513	0.733167	0.342461
2113	YER134C	P40081		-0.614334	0.889104	0.207421	-0.207587	0.218255	0.665597	-0.0017066	0.00163809	0.998258	0.124068	0.1266	0.833973
2169	PEP8	P40335		-1.17526	0.888561	0.207446	-1.81019	5.81715	0.000190106	-0.0175009	0.0219066	0.979547	-0.966674	2.23047	0.0461861
1632	TRM7	P38238		1.05678	0.888665	0.207446	NaN	NaN	NaN	-0.539838	0.289975	0.752367	0.6114	0.285149	0.665904
2251	EFM4	P40516		-0.628794	0.886173	0.208354	1.807	1.81668	0.0319023	-0.0525875	0.0651543	0.942722	0.816885	0.606432	0.40882
1353	GCS1	P35197		-0.38681	0.886217	0.208354	0.697946	1.69795	0.0398926	-0.344087	0.963463	0.373224	0.153767	0.256237	0.693524
2462	ARC1	P46672		0.199415	0.88554	0.208541	0.80342	4.23854	0.000766687	-0.143206	0.391204	0.675667	0.707432	3.235	0.0174925
4012	BMS1	Q08965		0.628438	0.884196	0.20907	0.765914	1.47721	0.0601912	-1.19777	1.38676	0.237854	-0.390445	0.822393	0.303654
4102	SPC3	Q12133		-0.811438	0.883187	0.209328	-0.81028	0.945823	0.164251	NaN	NaN	NaN	-0.00136566	0.00114291	0.998669
3125	VPS9	P54787		1.14302	0.88317	0.209328	NaN	NaN	NaN	1.05513	1.22194	0.282692	NaN	NaN	NaN
2940	SLH1	P53327		-1.19365	0.882607	0.209482	-1.51022	3.39953	0.00240747	-1.18546	0.940264	0.384101	-0.75316	1.31216	0.151876
4050	FCF2	Q12035		1.35256	0.878154	0.211522	0.949062	2.11767	0.018857	-0.237575	0.107823	0.899366	0.995546	2.01461	0.0605111
738	MEF1	P25039	TRUE	-0.983524	0.877267	0.211823	-1.45549	1.10735	0.120347	-0.0970449	0.0675478	0.941494	-1.95558	1.73986	0.0860926
4255	TFC7	Q12415		0.685531	0.877049	0.211823	-0.356368	0.601537	0.317382	0.397069	0.440972	0.636577	-0.475962	1.62486	0.0988968
1892	MLH1	P38920		-1.15243	0.874974	0.212446	-2.21952	1.97972	0.0241928	-1.77835	1.32759	0.246034	-0.41469	0.630014	0.396175
4251	ARP7	Q12406		-0.749755	0.874557	0.212446	-0.751378	2.21584	0.0160763	-0.692379	0.773658	0.449823	-1.58981	2.64324	0.0297458
3802	YLR419W	Q06698		-0.74653	0.874582	0.212446	-1.59553	5.63178	0.000190106	-0.467418	0.55742	0.553429	-0.45088	0.98064	0.244076
591	CKI1	P20485		-0.377383	0.874679	0.212446	-0.683967	1.93307	0.0262379	-0.00776815	0.0174416	0.982653	-0.390377	0.728499	0.344711
762	RVS161	P25343		-0.298702	0.874614	0.212446	-0.430882	1.2188	0.0974547	0.288526	0.909351	0.393559	-0.364222	0.951755	0.254871
1320	URB1	P34241		0.930616	0.873663	0.212764	0.641389	0.42605	0.447051	-0.0207825	0.00547265	0.995644	-0.911342	2.14993	0.0491241
4064	HFI1	Q12060		-1.44489	0.871547	0.213445	-1.04636	1.59083	0.0488388	NaN	NaN	NaN	NaN	NaN	NaN
186	RHO1	P06780		-0.505191	0.871899	0.213445	-0.163705	0.179808	0.714649	0.220967	0.453656	0.62685	-0.0511613	0.0634021	0.914084
795	PUP3	P25451		0.475102	0.871776	0.213445	-0.0352941	0.11417	0.807645	0.00522947	0.0079718	0.993011	-0.219289	1.85429	0.0752883
543	IRA1	P18963		-1.30395	0.870435	0.213873	-1.54207	3.80931	0.00137075	-0.383271	0.203229	0.81751	-0.928099	2.88326	0.0239961
2942	RNH70	P53331		1.44108	0.869845	0.214044	NaN	NaN	NaN	-0.203282	0.072332	0.936398	1.173	0.537337	0.454685
825	CWH43	P25618		-0.477616	0.868069	0.214699	-1.42276	2.92968	0.00501602	-0.0131559	0.0252086	0.978546	-0.92953	1.17986	0.184828
3613	PAL1	Q05518		0.359579	0.868034	0.214699	0.236295	0.420175	0.452382	0.259093	0.792834	0.442825	-0.316464	0.719995	0.348395
3590	SML1	Q04964		1.1224	0.867237	0.214974	NaN	NaN	NaN	1.8661	1.56945	0.196392	NaN	NaN	NaN
3845	CYK3	Q07533		1.4861	0.866499	0.21522	NaN	NaN	NaN	NaN	NaN	NaN	1.08301	0.500418	0.478234
2483	POL31	P46957		-0.812018	0.864408	0.216138	-0.713861	0.987305	0.15132	-1.0099	0.953406	0.377839	-1.0762	0.586511	0.421897
3148	HSK3	P69852		0.713238	0.864158	0.216142	NaN	NaN	NaN	0.228346	0.307922	0.737819	NaN	NaN	NaN
2809	MET13	P53128		-0.531161	0.862137	0.216789	-0.310651	0.275891	0.598228	-0.658236	1.0555	0.336687	0.476502	0.543642	0.450654
1095	SCM4	P32564	TRUE	-0.375975	0.862381	0.216789	-0.2136	0.744524	0.24188	-0.265021	0.49446	0.59654	-0.0480599	0.0634161	0.914084
587	DBP5	P20449		0.205735	0.862273	0.216789	0.481578	2.05748	0.0210452	0.073781	0.238947	0.788776	0.23188	1.11792	0.201795
3242	TRM44	Q02648		0.165257	0.859215	0.218132	0.765172	0.846686	0.197824	-0.873417	1.49133	0.215297	1.04458	1.52481	0.114379
1116	SAC6	P32599		-0.289144	0.858972	0.218133	-0.181087	1.27395	0.0876205	0.189549	0.675526	0.49643	0.064168	0.360795	0.595609
2095	AIM9	P40053	TRUE	-0.407172	0.85797	0.218516	-0.587603	1.90042	0.0275733	-0.198149	0.394816	0.673625	-0.160571	0.315325	0.637966
3258	PDR12	Q02785		-0.367457	0.857566	0.218598	-0.80652	5.40775	0.000239898	-0.256147	0.671408	0.497453	-1.06384	4.10102	0.00758576
1294	STO1	P34160		-0.571289	0.856843	0.218841	1.05117	3.69557	0.00160396	-0.201005	0.286623	0.7554	0.892939	2.14876	0.0491241
190	CDC21	P06785		-0.975502	0.855442	0.219427	-0.819996	2.38826	0.0119133	-1.29095	1.56463	0.197463	-0.572048	0.633177	0.394579
1240	DOM34	P33309		0.607673	0.85505	0.219503	-0.573844	0.906868	0.176854	-0.4471	0.652507	0.507619	-0.961836	2.034	0.0592999
2466	SUM1	P46676		-0.848262	0.849734	0.222024	-1.23278	1.28068	0.0865937	-0.807318	1.03086	0.347627	-1.15135	0.889094	0.278363
1718	RIM11	P38615		-0.363941	0.849131	0.222024	-2.50805	1.53511	0.0539373	-0.0416074	0.035341	0.970849	-2.63192	1.9469	0.0664016
61	PGK1	P00560	TRUE	0.206255	0.849428	0.222024	2.20601	2.76309	0.00650345	0.168977	0.949347	0.379261	0.679502	0.705929	0.356058
3113	KTR6	P54070		0.792002	0.849178	0.222024	-0.340353	0.471932	0.408528	0.098506	0.105789	0.901476	-0.616802	0.312908	0.640156
1605	HEK2	P38199		-0.257926	0.848824	0.222059	0.221121	0.198298	0.691763	0.193377	0.672785	0.497453	-0.570614	0.526646	0.461089
4268	GRX6	Q12438		1.99206	0.847863	0.222428	1.42857	0.560599	0.343691	1.51015	0.635251	0.51062	NaN	NaN	NaN
490	NCP1	P16603		-0.21628	0.847498	0.222493	-0.174457	1.03764	0.137606	0.0514712	0.178997	0.840369	-0.186081	0.511177	0.471869
936	SEC65	P29478		0.430139	0.846695	0.222779	-0.489955	0.505922	0.381934	0.188044	0.272464	0.765954	-0.273102	0.319106	0.634611
1322	HSL1	P34244	TRUE	1.43033	0.846461	0.222779	0.0878954	0.0292578	0.946018	NaN	NaN	NaN	-0.746483	0.507617	0.473633
2097	UTP7	P40055		1.08121	0.845984	0.222901	-0.40465	1.00909	0.14512	-0.635092	0.378436	0.685752	-1.21007	2.29138	0.0434887
1532	PRS4	P38063		-0.277415	0.843683	0.223881	-1.10193	0.828209	0.204584	0.145552	0.170686	0.848118	-1.32145	1.04073	0.224988
508	VMA1	P17255		-0.132714	0.843602	0.223881	0.213662	1.42491	0.0664104	-0.0287294	0.141151	0.879338	0.0566349	0.457319	0.512751
327	SBP1	P10080		-0.340042	0.839532	0.225865	-0.274523	1.16154	0.10887	0.0991564	0.233123	0.793687	0.117627	0.872474	0.283839
1758	YHR112C	P38716		-1.65105	0.83876	0.226143	0.317387	0.357567	0.509908	-1.50952	1.41963	0.234926	0.41194	0.543685	0.450654
1124	RTG2	P32608		-0.416546	0.834683	0.228151	-0.852322	4.173	0.000824121	-0.0378141	0.0556727	0.951092	-0.847005	2.38358	0.0391291
1563	POL12	P38121		0.501596	0.833371	0.228716	-0.73179	1.31304	0.0812803	0.277486	0.324541	0.725	-0.263678	0.220496	0.724799
1466	GLG1	P36143		-0.626005	0.832127	0.229246	-0.0399623	0.0314695	0.942553	-0.939396	2.54277	0.0648878	0.482107	1.35403	0.142612
1420	PMU1	P36069		1.82104	0.83118	0.229621	2.14804	1.10671	0.120368	-0.374944	0.12038	0.892823	NaN	NaN	NaN
2452	ROK1	P45818		0.870677	0.829821	0.230214	0.420963	0.734356	0.24649	-0.919623	0.355455	0.697412	-0.537282	0.430569	0.532636
4286	TRM11	Q12463		1.14224	0.829328	0.23035	NaN	NaN	NaN	NaN	NaN	NaN	NaN	NaN	NaN
4313	PTC5	Q12511	TRUE	-0.619151	0.828941	0.230429	0.230865	0.153521	0.74784	1.24502	0.742536	0.462489	0.319345	0.218492	0.72724
3468	PPM1	Q04081		-1.10149	0.828064	0.230643	-1.3532	0.367874	0.5004	0.21945	0.262789	0.769629	1.17016	0.375855	0.58162
3953	SLK19	Q08581		-0.505822	0.828237	0.230643	-0.067781	0.091464	0.842777	-0.546488	1.0441	0.342442	0.302233	0.703833	0.356887
1357	SKI2	P35207		-0.782244	0.827703	0.230709	-0.213551	0.466155	0.413576	0.100081	0.116135	0.896222	0.181145	0.224962	0.719578
3062	LSM7	P53905		0.445962	0.827391	0.230749	0.893791	1.24927	0.091724	-0.0312557	0.0257949	0.978546	0.449362	0.489952	0.485602
1217	VPS17	P32913		-0.397831	0.826328	0.231188	-0.52588	0.831389	0.203486	0.346113	0.822516	0.433964	0.0206943	0.0252768	0.964766
3750	MRI1	Q06489		0.43242	0.82554	0.231482	1.77337	1.64469	0.0442065	-0.247302	0.450067	0.62861	0.204109	0.12071	0.840003
3875	ENT4	Q07872		-1.88227	0.823996	0.23218	-0.800034	0.857567	0.193914	-1.13477	0.396147	0.672607	NaN	NaN	NaN
2660	NUP57	P48837		-0.440186	0.823144	0.232509	-0.2167	0.694608	0.26671	-0.789578	1.70308	0.173345	-0.493902	2.14366	0.0495922
3879	CMS1	Q07897		0.75844	0.822644	0.232651	0.596931	1.44558	0.063863	-0.494919	0.782676	0.444587	-0.814884	1.23829	0.169407
2732	UBC13	P52490		-0.565048	0.821441	0.233169	-0.174254	0.165938	0.731358	0.179969	0.184762	0.833862	-0.299461	0.156649	0.79653
1735	SRP68	P38687		-0.487357	0.82077	0.233403	-0.986459	2.3308	0.0130696	-0.166107	0.284225	0.756009	-0.403136	0.882525	0.279654
800	GBP2	P25555		-0.286391	0.819664	0.233871	0.101333	0.19643	0.694106	-0.358546	1.1152	0.31613	-0.504014	1.29856	0.155295
3074	DMA2	P53924		-0.752728	0.817065	0.235147	-1.26404	1.3588	0.0747546	-1.96496	2.2968	0.0892346	-0.391232	0.690255	0.364381
1079	GCD6	P32501		0.467585	0.816177	0.235501	-0.150445	0.336361	0.532296	-0.135961	0.212189	0.811	-0.658389	1.29866	0.155295
1072	AEP1	P32493	TRUE	-1.20718	0.815088	0.235901	-1.38389	0.69834	0.264919	NaN	NaN	NaN	NaN	NaN	NaN
4367	VMA9	Q3E7B6		-0.351	0.814968	0.235901	-2.13387	0.942166	0.16537	NaN	NaN	NaN	NaN	NaN	NaN
1535	RIB1	P38066		-0.363533	0.814524	0.236014	-0.28312	0.862689	0.192018	-0.327559	0.72558	0.469882	0.914131	3.88247	0.00986696
3716	YLR173W	Q06247		1.32991	0.808597	0.239128	NaN	NaN	NaN	NaN	NaN	NaN	NaN	NaN	NaN
172	TPK2	P06245		-0.84812	0.805439	0.240613	0.280706	0.256916	0.620611	0.587898	0.542093	0.565471	-0.204834	0.0561471	0.922657
1528	AHP1	P38013		0.791256	0.805637	0.240613	1.16361	2.68075	0.00734016	0.327763	0.388591	0.677382	-0.17405	0.120027	0.840416
3132	DOS2	P54858		-0.365379	0.803685	0.241456	-0.18288	0.255561	0.621681	0.437124	1.15922	0.300222	-0.103221	0.127334	0.833291
1551	YMC2	P38087	TRUE	1.78491	0.80187	0.242336	NaN	NaN	NaN	NaN	NaN	NaN	NaN	NaN	NaN
2529	BNA3	P47039	TRUE	-1.1071	0.801018	0.242519	1.65715	2.20458	0.0163845	-0.379884	0.266284	0.767922	0.935846	0.833452	0.299213
4282	YPR1	Q12458		-0.361355	0.800839	0.242519	-0.180409	0.266578	0.608876	0.0341473	0.054947	0.952033	0.339921	0.698548	0.359256
3803	IMH1	Q06704		0.345835	0.80105	0.242519	-0.081327	0.286284	0.586875	-0.0304484	0.0325685	0.972346	-0.073175	0.0898783	0.877157
401	KIN2	P13186		0.998476	0.800128	0.242786	0.221158	0.242536	0.637088	1.223	1.09389	0.320624	0.697595	0.572836	0.430162
229	ERG12	P07277		-0.507972	0.798653	0.243481	0.745922	1.5084	0.0567684	-0.53373	0.882208	0.403659	0.446707	1.07737	0.212651
1140	GCG1	P32656		1.86594	0.797909	0.243767	0.108093	0.114686	0.806924	NaN	NaN	NaN	-0.0242639	0.0157642	0.977867
3571	RCO1	Q04779		-0.829897	0.796493	0.244432	-2.26093	2.88881	0.00530767	0.307385	0.280736	0.756639	-1.80115	2.15276	0.0490033
219	HTS1	P07263	TRUE	0.357563	0.795525	0.244845	1.10928	4.75094	0.000460834	0.00737953	0.017039	0.982653	0.143292	0.341844	0.612772
4208	MED1	Q12321		-0.573451	0.794678	0.245191	-1.20948	0.800862	0.216373	-0.457563	0.846288	0.419719	0.491801	0.294359	0.657138
937	MCM5	P29496		-1.24518	0.793896	0.245502	-1.46612	2.93896	0.00494552	-1.7457	1.08286	0.325615	-0.72717	0.887314	0.278825
1407	EBP2	P36049		0.581356	0.793645	0.245511	1.00551	2.69796	0.00716116	-0.364276	0.484827	0.603888	-0.182075	0.182663	0.769052
1129		P32618		-1.19555	0.792024	0.246165	-1.18824	3.24942	0.00302643	0.809105	1.15201	0.301458	0.866472	0.925097	0.264754
2296	SAP185	P40856		1.18829	0.792236	0.246165	NaN	NaN	NaN	NaN	NaN	NaN	-1.1952	0.853037	0.290364
2226	HPM1	P40481		1.74709	0.791447	0.246361	NaN	NaN	NaN	1.17415	0.367332	0.691788	NaN	NaN	NaN
1024	TFC1	P32367		-0.908462	0.790518	0.246756	-2.51652	3.81997	0.00136344	-0.689658	1.01988	0.352524	-1.35519	2.68126	0.0284488
275	KEX1	P09620		0.683913	0.78917	0.24739	-0.0695682	0.0454444	0.919485	-0.0909319	0.130031	0.886377	0.111596	0.128019	0.832656
2856	SWC4	P53201		-0.580173	0.788604	0.24758	-2.9144	3.45802	0.00220564	-0.448841	0.459732	0.62243	-0.883493	0.62652	0.398682
1435	TFA1	P36100		-0.410879	0.782763	0.250798	-1.02727	1.64947	0.0438277	-0.444455	0.956	0.376899	-1.42503	2.02455	0.059627
1151	ABD1	P32783		-0.835455	0.782179	0.250849	-0.958588	0.462231	0.416905	-0.745475	0.717044	0.474381	-0.905664	0.41058	0.551277
4336	SEC39	Q12745		-0.775373	0.781748	0.250849	-1.30329	2.77531	0.00639762	-0.268366	0.269223	0.767179	-1.25497	1.01619	0.232469
2917	PBP1	P53297	TRUE	-0.172086	0.781757	0.250849	-0.163148	1.00988	0.144977	-0.361697	2.35344	0.0842719	0.43496	2.46388	0.0358679
2552	COX16	P47081	TRUE	0.934646	0.781935	0.250849	-0.89279	1.78869	0.033689	NaN	NaN	NaN	0.536944	1.28281	0.159113
2801	INO80	P53115		-0.792476	0.781116	0.25096	-0.920494	1.59276	0.0486485	0.0994925	0.0830683	0.926443	-1.0091	0.878683	0.280969
1023	VMA6	P32366		0.334269	0.781085	0.25096	-0.200789	0.52349	0.369206	0.112936	0.375234	0.688336	-0.283801	0.408185	0.552544
3465	BNA7	Q04066		1.9767	0.780861	0.25096	0.426472	0.28218	0.591692	2.20848	0.886728	0.402212	0.784709	0.754681	0.331495
1190	UGP1	P32861		-0.143351	0.777866	0.252562	-0.218146	0.729888	0.248575	0.285715	1.6444	0.18108	0.0408363	0.112662	0.849289
403	PCT1	P13259		-0.707538	0.777157	0.252783	0.37463	0.161647	0.737066	-0.959612	1.60979	0.184488	NaN	NaN	NaN
3272	SYH1	Q02875		0.667028	0.777025	0.252783	-0.445858	0.606813	0.314671	-0.326682	0.705332	0.479738	-0.0867519	0.122417	0.838216
2534	TIM54	P47045	TRUE	-0.805943	0.77536	0.253618	0.0350323	0.0391637	0.929708	-0.171936	0.32282	0.725345	0.00143385	0.00201858	0.997942
3051	RIA1	P53893		-0.866934	0.774073	0.254236	0.197453	0.19812	0.691834	-1.74565	1.26371	0.26794	-0.158225	0.305312	0.647577
606	ATP15	P21306	TRUE	-0.568239	0.772744	0.25488	-1.01172	3.84231	0.00133915	0.400237	0.554726	0.554428	-0.266071	0.810937	0.309307
1379	APL2	P36000		-0.745647	0.772493	0.254892	-1.40815	2.6922	0.00722785	-0.454928	0.75138	0.457222	-1.01238	2.37386	0.0394494
4278	CEX1	Q12453		-0.877933	0.771393	0.255267	-0.661102	1.51403	0.0561238	-0.47173	0.80627	0.439406	-0.265924	0.527689	0.460446
1167	EMP24	P32803		0.23945	0.771563	0.255267	-0.293746	1.1421	0.112868	0.382884	0.628471	0.514659	-0.441949	2.30507	0.0430786
633	SNF2	P22082		-2.23088	0.769158	0.256448	-1.82138	1.38723	0.0710878	-2.23015	0.898316	0.39745	-0.93721	3.28839	0.0165101
291	RPL31B	P0C2H9		1.87038	0.768698	0.256584	1.85371	2.55117	0.00906769	1.50199	0.591094	0.534714	0.386957	0.478547	0.495145
1683	ARC40	P38328		-0.421067	0.767993	0.256729	-0.193673	0.432489	0.441655	-0.0845518	0.135122	0.883849	0.0386186	0.098245	0.866493
1040	BIO2	P32451	TRUE	-0.319739	0.768207	0.256729	-0.941638	0.545641	0.353171	-0.244199	0.441541	0.636096	0.0557947	0.0584058	0.920821
951	PRE4	P30657		0.484822	0.766325	0.25758	-0.61126	1.58893	0.0490012	0.77315	1.48716	0.216856	-0.750296	2.15759	0.048858
232	SEC53	P07283		0.220147	0.759843	0.261316	0.479175	3.68693	0.0016186	-0.102524	0.526748	0.576453	0.390361	1.16613	0.188535
3686	SGD1	Q06132		0.975153	0.758087	0.262236	3.1272	2.87725	0.00541302	NaN	NaN	NaN	NaN	NaN	NaN
3330	PRM15	Q03262		-0.584419	0.757623	0.262377	-0.986716	1.41927	0.0671782	-1.03102	1.75787	0.162342	-0.529057	0.786126	0.320094
2819	RMD9	P53140	TRUE	-0.686572	0.757137	0.26251	-2.08526	2.55046	0.00907354	-0.595384	0.734915	0.467285	-0.981054	1.06706	0.215576
3826	PBP4	Q07362		-0.676268	0.756945	0.26251	-0.0737109	0.0916663	0.842637	-0.811932	0.88791	0.401788	0.723751	0.79743	0.314766
4067	GRE2	Q12068		-0.391806	0.75655	0.262611	0.698028	0.956612	0.160679	-0.0634017	0.126371	0.889183	0.47937	0.601573	0.411873
3605	ASM4	Q05166		-0.628001	0.753127	0.264549	-1.49672	0.94003	0.165983	0.29589	0.317115	0.731768	-0.142213	0.478018	0.495509
2070	RPN3	P40016		-0.498277	0.75278	0.264621	-0.691844	2.54067	0.00924692	-0.438732	0.789483	0.442825	-0.464736	1.54764	0.110445
2207	MLP2	P40457		-1.61572	0.751736	0.264998	-1.22541	0.939223	0.166225	-0.901742	0.854719	0.415122	-0.519116	1.10329	0.206928
1401	ADD66	P36040		1.4575	0.751706	0.264998	NaN	NaN	NaN	0.443231	0.263816	0.768898	0.739291	0.421047	0.54265
4411	YPT6	Q99260		-0.656867	0.751198	0.265168	-0.848394	1.42887	0.066037	0.365314	0.359307	0.693722	-1.45313	1.89033	0.0712566
3900	TLG2	Q08144		-1.31043	0.749736	0.265923	-1.53202	1.76478	0.0351863	-0.484533	0.36106	0.692669	0.558643	0.973714	0.246877
4413	MED11	Q99278		-1.11045	0.748973	0.266241	NaN	NaN	NaN	0.25358	0.130605	0.886377	NaN	NaN	NaN
3333	TOM1	Q03280		-0.89302	0.74876	0.266241	-1.13492	2.2469	0.0152315	-1.57163	2.28852	0.0892346	-0.888014	2.19538	0.0471378
1127	FRD1	P32614		-0.34816	0.747517	0.266864	0.731682	1.61064	0.046963	-0.331661	0.930403	0.384907	0.71408	1.74726	0.0852575
1370	DEF1	P35732		0.267645	0.746668	0.267246	0.00235796	0.00473443	0.991108	-0.134905	0.315149	0.732363	-0.0504317	0.0886554	0.878737
3266	SRP1	Q02821		-0.294989	0.744055	0.268538	0.417804	1.76362	0.03526	-0.0593467	0.10631	0.901454	0.0987983	0.123093	0.838161
132	ARG3	P05150		0.284817	0.744144	0.268538	0.136165	0.0663133	0.883218	0.247118	0.938222	0.384784	0.274691	0.251216	0.699881
3705	YLR455W	Q06188		1.65918	0.743891	0.268538	-0.88964	0.590604	0.324086	NaN	NaN	NaN	-1.05506	1.06254	0.216724
2158	PRE6	P40303	TRUE	-0.368787	0.739514	0.271116	-0.38141	1.3357	0.0778686	-0.109362	0.190149	0.831014	-0.260994	0.858088	0.288484
2458	GUS1	P46655	TRUE	0.194821	0.736578	0.272812	0.947035	4.57635	0.000542504	-0.159637	0.626848	0.515875	0.796267	3.42134	0.01556
2869	TIM21	P53220	TRUE	-1.26183	0.736307	0.27284	-1.07931	1.25087	0.0915444	NaN	NaN	NaN	1.2848	0.704553	0.356769
1660	IFA38	P38286		-0.541334	0.735496	0.273207	-1.21836	3.73297	0.00152317	-0.0904269	0.0852613	0.923411	-0.864908	2.0974	0.0534881
3625	RRP45	Q05636		0.86925	0.732446	0.274988	0.0896339	0.157218	0.743057	0.674395	0.526683	0.576453	-1.56195	1.48885	0.119068
3993	CBC2	Q08920		0.777895	0.730108	0.276328	1.95105	2.46953	0.0104744	-0.029995	0.0188973	0.981955	1.25895	1.60185	0.102275
1884	RTS1	P38903		0.499147	0.729797	0.276382	-0.484332	0.854342	0.195053	0.630169	0.658086	0.504406	0.0879965	0.0919177	0.875194
381	HMG2	P12684		-0.416436	0.725805	0.278789	-1.68506	1.26447	0.0892643	-0.774382	0.476837	0.609251	0.384424	0.242109	0.707542
3536	MGR3	Q04472	TRUE	-0.897268	0.724675	0.279224	-3.36539	2.79023	0.00620354	-1.31608	2.07038	0.114714	-1.01483	1.15609	0.191569
2022	SNF7	P39929		-0.603362	0.724892	0.279224	-0.419387	0.640898	0.296323	-0.270309	0.281379	0.756553	0.0506229	0.0594266	0.919603
31	RTC6	O14464	TRUE	-0.602248	0.722693	0.280355	-0.576557	0.508388	0.380164	-0.0766673	0.0586165	0.948549	NaN	NaN	NaN
761	CDC10	P25342		-1.59761	0.719957	0.28198	-1.18006	1.10715	0.12035	-0.970975	0.404862	0.666029	-1.20821	1.17754	0.185649
3646	YLR287C	Q05881		0.414495	0.719051	0.282422	0.731387	0.878401	0.186812	-0.764121	1.68576	0.173402	0.215584	0.237363	0.711112
1911	HAL5	P38970		-0.729827	0.717412	0.283186	-0.656376	1.94308	0.025719	-0.204869	0.564374	0.547579	-0.00634861	0.00422516	0.994517
661	RFA1	P22336		-0.248856	0.717647	0.283186	-0.19398	0.296663	0.574666	0.100315	0.226929	0.800288	0.473194	0.883488	0.27942
4171	NYV1	Q12255		0.772717	0.717202	0.283186	-0.698083	0.818152	0.208731	1.54075	1.54899	0.199642	0.138405	0.125179	0.835617
449	TAL1	P15019		0.110771	0.716243	0.283664	0.574113	2.00554	0.0230353	-0.00544834	0.0183822	0.981955	0.184885	0.540191	0.452858
2008	FUN12	P39730		0.326918	0.71575	0.28384	0.358198	1.26586	0.0890865	-0.0682483	0.179221	0.840271	-0.154279	0.347303	0.606977
3115	ADE16	P54113		-0.151785	0.715428	0.283902	0.650796	1.58857	0.0490147	-0.152544	0.426219	0.648133	0.719291	2.45897	0.0360796
574	PRP4	P20053		-1.48944	0.714952	0.284067	-1.23649	1.1012	0.121694	NaN	NaN	NaN	NaN	NaN	NaN
1284	GCN1	P33892		0.316544	0.714236	0.284241	-0.0137739	0.0385902	0.93067	0.131042	0.439803	0.637449	-0.280941	1.13335	0.197532
2968	NRD1	P53617		0.419332	0.714444	0.284241	-0.515037	0.96435	0.158425	-0.309849	0.345273	0.707255	-0.273664	0.721317	0.348213
1075	RPN12	P32496		-0.272055	0.713942	0.284286	-0.214079	0.52095	0.370858	-0.075685	0.149379	0.869457	-0.0640216	0.240775	0.708805
2148		P40207		1.21015	0.713398	0.284495	-1.05942	2.38286	0.0119905	1.30414	0.79628	0.442562	-1.42844	0.929505	0.263392
1028	PUP2	P32379		-0.403576	0.713125	0.284527	-0.452483	1.21857	0.0974608	-0.0669494	0.127652	0.888564	-0.344102	0.761289	0.328671
139	SUP35	P05453		0.169614	0.710412	0.286162	0.0908308	0.494896	0.389877	0.024416	0.185906	0.833809	0.443653	4.65789	0.00369372
952	MCM4	P30665		-0.253026	0.709651	0.286516	-0.93717	2.40948	0.0115298	-0.0633507	0.130336	0.886377	-0.347999	0.617805	0.403448
943	PMI40	P29952		0.283067	0.707336	0.28775	0.769822	2.3671	0.0122528	-0.0414429	0.0650271	0.942722	0.669229	1.91051	0.0699206
3852	ACK1	Q07622		1.59955	0.707557	0.28775	-4.28257	3.51444	0.00204194	-0.478772	0.190159	0.831014	NaN	NaN	NaN
3031	JJJ1	P53863		1.12912	0.70637	0.288243	NaN	NaN	NaN	NaN	NaN	NaN	NaN	NaN	NaN
1561	ARL1	P38116		-0.61545	0.705463	0.288696	-0.0414286	0.078221	0.86338	-0.652688	0.725351	0.469882	-0.193217	0.13995	0.816244
3855	DTD1	Q07648	TRUE	-0.401923	0.704321	0.289258	-0.152465	0.181292	0.713692	-0.283784	0.538905	0.568577	-0.499643	0.407436	0.552989
4018	YPL225W	Q08971		-0.322058	0.704171	0.289258	0.0291133	0.0344832	0.936835	-0.652562	2.65814	0.0555896	-0.0337148	0.114236	0.847731
810	EMC1	P25574		-0.812043	0.703333	0.289668	-1.2934	2.32514	0.0132097	-0.452774	0.561515	0.549969	-0.905735	2.19571	0.0471378
3587	RTN1	Q04947		-0.277167	0.700519	0.291401	0.294436	0.912827	0.175076	0.0576954	0.122353	0.890762	0.400429	1.07368	0.213694
1664	EHT1	P38295		-0.366441	0.698962	0.292297	-0.465767	1.91505	0.0270181	0.0483065	0.0590517	0.947924	-0.0713992	0.268061	0.682103
2130	IES2	P40154		-0.978332	0.697834	0.292784	0.199347	0.369011	0.499747	-1.178	0.980334	0.366502	0.132254	0.0972385	0.867493
2862	YGR017W	P53210		0.749548	0.697793	0.292784	1.04383	2.05687	0.0210452	0.287762	0.25865	0.773558	0.336745	0.543058	0.450901
3399	CGI121	Q03705		-0.59896	0.697457	0.292861	0.237906	0.710056	0.259024	-0.426691	0.738656	0.465416	-0.32399	0.402112	0.557252
1094	VPH1	P32563		0.225786	0.696592	0.293294	0.0302305	0.0996822	0.830384	0.452186	1.41917	0.234926	-0.218905	1.11419	0.203012
2133	VID27	P40157		-1.37691	0.6947	0.294173	-1.75591	1.6995	0.0397728	-0.0881538	0.0579067	0.948835	-0.737671	1.65604	0.0954974
2455	MET12	P46151		-1.17696	0.694625	0.294173	-1.27495	2.12543	0.0186396	0.219032	0.108331	0.899366	0.45525	0.632306	0.394704
2465	STU2	P46675		1.00296	0.694878	0.294173	-0.820416	0.952609	0.161836	0.330503	0.203646	0.81751	-0.286851	0.215597	0.731247
427	SNA3	P14359		0.966894	0.693533	0.294763	-1.61166	3.22996	0.00312514	1.93723	3.27215	0.0282328	-0.597243	1.39748	0.135334
861	RFA3	P26755		0.445624	0.692501	0.295313	0.862935	1.35756	0.0749093	0.699439	1.80062	0.157608	0.911669	1.09681	0.208677
3220	RSC4	Q02206		0.425519	0.692221	0.295352	-0.56697	0.850461	0.196419	-0.0892911	0.0853381	0.923411	-0.828328	1.50377	0.116716
2055	GTT3	P39996		-0.721972	0.691771	0.295507	-1.08255	0.92186	0.171888	-0.522253	0.921525	0.388906	-1.77554	1.63435	0.09789
3311	MTG1	Q03151	TRUE	1.54884	0.691055	0.295843	-0.558659	0.18536	0.708981	1.96276	1.00391	0.359274	NaN	NaN	NaN
1710	CUE1	P38428		-0.594786	0.688495	0.29731	0.0427518	0.0287142	0.946933	-0.533794	0.691948	0.485664	-0.243893	0.202945	0.747902
411	PMR1	P13586		-0.40056	0.688428	0.29731	-0.296108	1.61107	0.046963	0.252116	0.513914	0.583786	-0.314285	0.416806	0.546775
3762	YPR148C	Q06523		-0.281995	0.688243	0.29731	0.391362	2.36876	0.012216	0.263239	0.640239	0.509721	0.61799	2.64017	0.0297458
4178	RBD2	Q12270		-0.460938	0.686574	0.298302	-0.70051	1.39304	0.0703486	-0.0848784	0.0935873	0.91412	-0.303474	0.54286	0.450901
2415	WWM1	P43582		-0.605643	0.684898	0.299303	0.565714	1.69258	0.0402981	0.248641	0.598027	0.529078	1.17759	1.97515	0.0642666
1848	KEL1	P38853		-0.748363	0.682589	0.300363	0.612169	0.587055	0.32613	-0.468456	0.867158	0.409542	-0.122239	0.402202	0.557252
2702	PSP2	P50109		0.283559	0.682478	0.300363	0.226429	0.501998	0.384739	0.414382	0.723485	0.470332	0.459558	1.21312	0.176654
907	YJU3	P28321		0.410519	0.683058	0.300363	-0.881365	0.666403	0.281473	-0.0505195	0.0954867	0.911944	-0.509129	0.536618	0.454744
416	RSR1	P13856		1.84824	0.682745	0.300363	0.21812	0.284549	0.588848	1.61798	0.484876	0.603888	-0.504356	0.597904	0.414702
505	KAR3	P17119		0.711934	0.682128	0.300453	-2.86911	2.18256	0.016922	NaN	NaN	NaN	NaN	NaN	NaN
843	CSM1	P25651		-1.95511	0.680955	0.301113	-2.38282	1.04511	0.135543	-0.323719	0.0902487	0.917725	-0.991751	0.291579	0.65992
2183	SEC9	P40357		-0.278501	0.680507	0.30127	0.637513	1.7286	0.0377443	-0.0221982	0.0262542	0.978546	1.06387	1.36155	0.141003
3744	CRN1	Q06440		0.505982	0.679772	0.301552	0.248852	0.380265	0.489214	-0.112111	0.424199	0.648133	-0.351529	0.96382	0.250111
1139	ECM32	P32644		1.54571	0.679661	0.301552	-1.5865	2.98076	0.00462582	-0.31691	0.151885	0.866408	-2.31409	1.1134	0.203209
317	RPL2B;RPL2A	P0CX46;P0CX45		0.202574	0.678404	0.302233	0.581134	2.01202	0.022859	-0.186565	1.28823	0.259526	0.0382204	0.0614813	0.917165
404	URA5	P13298		0.47341	0.678017	0.302233	1.14386	3.35526	0.00257407	0.241028	0.393376	0.674419	0.426364	1.8446	0.0759238
3759	RRP15	Q06511		0.846792	0.6778	0.302233	NaN	NaN	NaN	-0.379718	0.210917	0.812024	-2.49007	0.89857	0.275564
2061	NOP16	P40007		1.98453	0.678096	0.302233	2.10062	1.90641	0.0273629	0.980071	0.290321	0.752152	-0.726714	0.432068	0.532253
3149	ADE12	P80210		-0.304486	0.675927	0.303386	0.513515	1.25141	0.0914827	-0.16609	0.253881	0.777968	-0.176669	0.189223	0.761853
4273	PAA1	Q12447		-0.394683	0.675546	0.303499	0.0708427	0.137325	0.771178	-0.812454	1.47983	0.218771	0.164206	0.352958	0.603092
1771	OTU2	P38747		0.907056	0.674567	0.30403	0.452055	0.633137	0.300244	0.677633	0.607399	0.524325	0.929657	0.995294	0.240537
592	CKS1	P20486		1.02804	0.672462	0.305243	3.22119	1.23328	0.09473	1.41641	1.17704	0.295341	2.34803	0.649726	0.385543
960	DEG1	P31115	TRUE	1.10337	0.6724	0.305243	-0.0222483	0.0143135	0.972774	0.00684309	0.00240311	0.998258	0.266377	0.183138	0.768588
1764	ECM29	P38737		0.646177	0.67171	0.305573	-1.12636	2.08253	0.020111	-1.52387	1.29725	0.256636	0.311934	0.475774	0.496634
2081	RSM18	P40033	TRUE	-0.64562	0.670751	0.306095	-2.54795	2.2349	0.0155294	0.628558	1.04175	0.343204	-1.3166	1.77014	0.0825783
373	SIR4	P11978		-1.69689	0.669667	0.306627	-0.874226	0.163647	0.734121	-0.228928	0.0790067	0.930358	1.22843	0.245917	0.703691
2270	SNL1	P40548		-0.296358	0.669559	0.306627	0.0963063	0.169003	0.728188	-0.811462	1.96252	0.131897	-0.354674	0.17264	0.779301
653	SEC22	P22214		-0.765744	0.66564	0.309251	2.48565	1.83965	0.0306551	-0.170359	0.225835	0.800944	0.155895	0.0578153	0.921443
801	BUD3	P25558		1.91457	0.661904	0.311765	NaN	NaN	NaN	0.912288	0.27371	0.765492	1.65972	0.600126	0.413027
2164	SSM4	P40318		0.531763	0.661586	0.311837	-0.421924	1.14033	0.113263	0.478306	0.521053	0.578792	0.0439301	0.036934	0.948521
3428	AIM36	Q03798	TRUE	-1.24101	0.657924	0.314161	-0.961792	0.935628	0.167334	-0.413584	0.153605	0.863989	NaN	NaN	NaN
3928	HRT1	Q08273		-0.342754	0.658004	0.314161	-0.642412	0.531186	0.363265	-0.0899186	0.124372	0.889861	-0.800308	0.759907	0.329041
1214	RPC34	P32910	TRUE	-0.493682	0.657255	0.314487	0.829547	0.753744	0.237516	-1.52017	2.57228	0.0628697	-0.265832	0.163889	0.789808
2766	RAI1	P53063		0.829876	0.656855	0.314619	-0.0541511	0.0503233	0.910549	0.452006	0.654341	0.506208	-0.754725	1.6889	0.0917826
467	URA6	P15700		-0.499687	0.655482	0.315457	1.86026	2.65503	0.00765922	-0.59537	1.15722	0.301067	0.628984	0.649742	0.385543
4061	ISU2	Q12056	TRUE	1.97488	0.65351	0.316734	0.0977416	0.103865	0.823633	0.858816	0.227946	0.798845	-1.09344	0.553819	0.443975
2555		P47084	TRUE	-1.36277	0.652354	0.31726	0.509666	0.367898	0.5004	-1.62972	0.732044	0.4678	-1.25835	1.1959	0.180749
2450	CKB1	P43639		0.437132	0.652358	0.31726	-0.208522	0.140623	0.766026	0.131711	0.12281	0.890652	-0.642715	0.52864	0.459903
3779	MHR1	Q06630	TRUE	-0.578024	0.651821	0.31749	-1.41522	2.69165	0.00722975	0.456063	0.935514	0.384907	-0.837893	1.48059	0.11983
2260	GVP36	P40531		-0.235369	0.648186	0.319999	-0.05441	0.174812	0.72069	0.293823	0.966753	0.372436	0.0713043	0.232831	0.714268
158	PRT1	P06103		0.401248	0.647453	0.320379	0.552897	4.11007	0.000899597	0.0478334	0.0417955	0.966157	0.284612	0.575399	0.428975
[truncated: 2,410 more rows]
