# Supplementary material for: The metabolite-controlled ubiquitin conjugase Ubc8 promotes mitochondrial protein import
Source: Life Sci Alliance. 2022 Oct 17;6(1):e202201526. doi: 10.26508/lsa.202201526 (PMC9579816; doi:10.26508/lsa.202201526)
Supplement: Supplementary file 6 [file LSA-2022-01526_TableS2.xlsx]

## Sheet: Group 1
Description	FDR q-value	Enrichment	Count	GO
cytosol	0.466	1.51	52	Component
melatonin binding	0.000216	8.27	8	Function
hormone binding	0.000108	8.27	8	Function
oxidoreductase activity, acting on the aldehyde or oxo group of donors, NAD or NADP as acceptor	0.412	4.07	7	Function
monocarboxylic acid biosynthetic process	2.34e-08	4.99	22	Process
nucleotide catabolic process	1.4e-08	6.76	16	Process
ATP generation from ADP	4.65e-08	7.23	14	Process
glycolytic process	3.49e-08	7.23	14	Process
pyruvate biosynthetic process	2.79e-08	7.23	14	Process
ribonucleoside diphosphate metabolic process	3.78e-08	6.2	16	Process
organic acid biosynthetic process	5.77e-08	3.02	36	Process
carboxylic acid biosynthetic process	5.05e-08	3.02	36	Process
nucleoside diphosphate phosphorylation	5.33e-08	6.85	14	Process
nucleotide phosphorylation	4.8e-08	6.85	14	Process
nucleoside phosphate catabolic process	5.19e-08	5.95	16	Process
nucleoside diphosphate metabolic process	1.12e-07	5.72	16	Process
ADP metabolic process	1.16e-07	6.07	15	Process
purine ribonucleoside diphosphate metabolic process	1.08e-07	6.07	15	Process
purine nucleoside diphosphate metabolic process	1.01e-07	6.07	15	Process
pyridine-containing compound biosynthetic process	3.96e-07	5.31	16	Process
nicotinamide nucleotide biosynthetic process	1.04e-06	5.37	15	Process
nucleobase-containing small molecule biosynthetic process	1.03e-06	4.31	19	Process
pyridine nucleotide biosynthetic process	1.91e-06	5.17	15	Process
small molecule biosynthetic process	2.08e-06	2.31	44	Process
pyruvate metabolic process	3.36e-06	4.98	15	Process
cofactor biosynthetic process	3.85e-06	3.33	24	Process
organophosphate catabolic process	3.89e-06	4.39	17	Process
nicotinamide nucleotide metabolic process	5.42e-06	3.62	21	Process
pyridine nucleotide metabolic process	7.63e-06	3.55	21	Process
pyridine-containing compound metabolic process	1.06e-05	3.49	21	Process
coenzyme biosynthetic process	1.47e-05	3.43	21	Process
monocarboxylic acid metabolic process	3.96e-05	2.68	28	Process
ATP biosynthetic process	4.13e-05	4.49	14	Process
gluconeogenesis	9.92e-05	6.44	9	Process
hexose biosynthetic process	9.6e-05	6.44	9	Process
coenzyme metabolic process	0.000104	2.62	27	Process
oxidoreduction coenzyme metabolic process	0.000117	3.05	21	Process
purine ribonucleoside triphosphate biosynthetic process	0.000159	4.07	14	Process
purine nucleoside triphosphate biosynthetic process	0.000155	4.07	14	Process
carbohydrate catabolic process	0.000166	3.63	16	Process
monosaccharide biosynthetic process	0.000204	5.98	9	Process
purine nucleoside monophosphate biosynthetic process	0.000332	3.46	16	Process
purine ribonucleoside monophosphate biosynthetic process	0.000323	3.46	16	Process
ribonucleoside triphosphate biosynthetic process	0.000328	3.83	14	Process
nucleoside monophosphate biosynthetic process	0.000331	3.29	17	Process
purine-containing compound biosynthetic process	0.000448	3.1	18	Process
nucleoside triphosphate biosynthetic process	0.000461	3.72	14	Process
ATP metabolic process	0.000529	3.49	15	Process
carboxylic acid metabolic process	0.00053	1.85	46	Process
purine nucleoside triphosphate metabolic process	0.000549	3.31	16	Process
nucleobase-containing compound catabolic process	0.000613	2.82	20	Process
cofactor metabolic process	0.000713	2.18	31	Process
ribonucleoside monophosphate biosynthetic process	0.000716	3.23	16	Process
purine ribonucleotide biosynthetic process	0.000703	3.1	17	Process
cellular nitrogen compound catabolic process	0.000712	2.62	22	Process
oxoacid metabolic process	0.000854	1.81	46	Process
organic acid metabolic process	0.000838	1.81	46	Process
ribonucleotide biosynthetic process	0.00083	2.94	18	Process
purine nucleotide biosynthetic process	0.00086	3.04	17	Process
organonitrogen compound biosynthetic process	0.000853	1.63	61	Process
ribose phosphate biosynthetic process	0.00103	2.89	18	Process
purine ribonucleoside triphosphate metabolic process	0.00113	3.24	15	Process
organic cyclic compound biosynthetic process	0.00117	1.87	41	Process
glucose metabolic process	0.00122	4.09	11	Process
biosynthetic process	0.00143	1.43	86	Process
nucleoside triphosphate metabolic process	0.00142	3.04	16	Process
heterocycle biosynthetic process	0.00161	1.9	38	Process
heterocycle catabolic process	0.00163	2.54	21	Process
carbohydrate derivative biosynthetic process	0.0017	2.4	23	Process
monosaccharide metabolic process	0.00172	3.45	13	Process
ribonucleoside triphosphate metabolic process	0.00182	3.1	15	Process
drug metabolic process	0.00182	2.06	31	Process
nucleoside phosphate biosynthetic process	0.00187	2.5	21	Process
nucleotide biosynthetic process	0.00185	2.5	21	Process
ribose phosphate metabolic process	0.00229	2.41	22	Process
nucleoside monophosphate metabolic process	0.00227	2.7	18	Process
nucleotide metabolic process	0.00252	2.12	28	Process
organic substance biosynthetic process	0.00259	1.41	84	Process
cellular biosynthetic process	0.00287	1.42	81	Process
aromatic compound biosynthetic process	0.00289	1.86	37	Process
hexose metabolic process	0.00342	3.65	11	Process
purine nucleoside monophosphate metabolic process	0.00338	2.81	16	Process
purine ribonucleoside monophosphate metabolic process	0.00334	2.81	16	Process
organic cyclic compound catabolic process	0.00366	2.38	21	Process
nucleoside phosphate metabolic process	0.00362	2.07	28	Process
aromatic compound catabolic process	0.00431	2.42	20	Process
small molecule metabolic process	0.00624	1.51	61	Process
ribonucleoside monophosphate metabolic process	0.00655	2.66	16	Process
nucleobase-containing small molecule metabolic process	0.00651	1.97	29	Process
phosphorylation	0.00685	2.09	25	Process
purine-containing compound metabolic process	0.00728	2.39	19	Process
purine nucleotide metabolic process	0.0106	2.39	18	Process
carbohydrate derivative metabolic process	0.0121	1.9	29	Process
ribonucleotide metabolic process	0.0218	2.26	18	Process
nucleobase-containing compound biosynthetic process	0.0219	1.79	31	Process
purine ribonucleotide metabolic process	0.0218	2.32	17	Process
threonine biosynthetic process	0.0243	7.44	4	Process
organophosphate biosynthetic process	0.0368	1.94	23	Process

## Sheet: Group 2
Description	FDR q-value	Enrichment	Count	GO
ribonucleoprotein complex	1.63e-47	2.46	184	Component
preribosome	1.21e-46	3.65	93	Component
nucleolus	2.25e-44	3.25	109	Component
non-membrane-bounded organelle	2.44e-37	2.05	206	Component
intracellular non-membrane-bounded organelle	1.95e-37	2.05	206	Component
cytosolic part	1.02e-29	3.12	81	Component
90S preribosome	1.95e-22	3.72	45	Component
cytosolic large ribosomal subunit	3.84e-21	3.78	41	Component
preribosome, large subunit precursor	9.27e-18	3.67	37	Component
nuclear part	1.94e-14	1.76	139	Component
ribosomal subunit	6.07e-14	2.28	73	Component
ribosome	1.6e-13	2.22	75	Component
protein-containing complex	3.95e-13	1.39	251	Component
cytosolic small ribosomal subunit	7.35e-13	3.41	31	Component
small-subunit processome	1.68e-12	3.48	29	Component
nucleus	1.76e-12	1.4	240	Component
nucleolar part	1.69e-10	3.52	24	Component
large ribosomal subunit	2.61e-08	2.35	42	Component
cytoplasm	1.27e-07	1.24	278	Component
preribosome, small subunit precursor	1.65e-06	3.7	14	Component
small ribosomal subunit	3.67e-05	2.19	31	Component
RNA polymerase I complex	0.00108	3.57	9	Component
small nucleolar ribonucleoprotein complex	0.00104	3.57	9	Component
nuclear DNA-directed RNA polymerase complex	0.00126	3.3	10	Component
nucleoplasm	0.00351	2.48	15	Component
DNA-directed RNA polymerase complex	0.0039	3.05	10	Component
RNA polymerase complex	0.00376	3.05	10	Component
polysome	0.0066	2.64	12	Component
cytoplasmic stress granule	0.0245	1.89	21	Component
RNA binding	1.12e-26	2.17	148	Function
nucleic acid binding	3.29e-21	1.83	175	Function
heterocyclic compound binding	2.35e-16	1.46	254	Function
organic cyclic compound binding	1.1e-15	1.45	254	Function
structural constituent of ribosome	3.24e-12	2.23	71	Function
catalytic activity, acting on RNA	3.5e-10	2.4	52	Function
rRNA binding	1.72e-09	2.83	35	Function
structural molecule activity	1.69e-09	2.01	72	Function
snoRNA binding	3.62e-08	3.76	18	Function
RNA methyltransferase activity	3.35e-06	3.52	16	Function
catalytic activity, acting on a tRNA	1.78e-05	2.61	25	Function
binding	2.12e-05	1.17	322	Function
tRNA binding	0.000486	2.97	15	Function
tRNA methyltransferase activity	0.000469	3.96	9	Function
ligase activity	0.000474	2.18	28	Function
5'-3' RNA polymerase activity	0.00087	3.6	10	Function
DNA-directed 5'-3' RNA polymerase activity	0.000818	3.6	10	Function
RNA polymerase activity	0.000773	3.6	10	Function
mRNA binding	0.00127	1.76	44	Function
transferase activity, transferring one-carbon groups	0.00123	2.21	24	Function
aminoacyl-tRNA ligase activity	0.00196	2.7	15	Function
ligase activity, forming carbon-oxygen bonds	0.00187	2.7	15	Function
U3 snoRNA binding	0.00222	3.57	9	Function
RNA polymerase I activity	0.00213	3.57	9	Function
methyltransferase activity	0.00701	2.13	21	Function
rRNA methyltransferase activity	0.00712	3.52	8	Function
catalytic activity, acting on a rRNA	0.00686	3.52	8	Function
translation factor activity, RNA binding	0.00671	2.48	15	Function
large ribosomal subunit rRNA binding	0.0075	3.05	10	Function
S-adenosylmethionine-dependent methyltransferase activity	0.00884	2.23	18	Function
ribonucleoprotein complex binding	0.0116	2.25	17	Function
ligase activity, forming carbon-nitrogen bonds	0.0503	2.38	12	Function
ribonucleoprotein complex biogenesis	5.72e-49	3.37	114	Process
ncRNA metabolic process	3.99e-48	2.82	150	Process
rRNA processing	6.83e-45	3.26	111	Process
rRNA metabolic process	6.12e-45	3.12	119	Process
cellular component biogenesis	3.04e-43	3.14	114	Process
ncRNA processing	1.02e-41	2.93	124	Process
ribosome biogenesis	9.2e-41	3.32	98	Process
RNA metabolic process	6.11e-32	2.16	168	Process
cytoplasmic translation	7.01e-32	3.48	72	Process
RNA processing	1.57e-31	2.48	129	Process
cellular nitrogen compound metabolic process	1.17e-30	1.64	277	Process
nucleic acid metabolic process	2.31e-26	1.95	177	Process
organic cyclic compound metabolic process	1.04e-21	1.64	225	Process
cellular aromatic compound metabolic process	1.01e-21	1.66	218	Process
heterocycle metabolic process	9.46e-21	1.65	216	Process
nucleobase-containing compound metabolic process	1.76e-20	1.67	206	Process
translation	2.33e-20	2.26	106	Process
peptide biosynthetic process	2.2e-20	2.26	106	Process
amide biosynthetic process	9.86e-20	2.18	111	Process
ribosomal large subunit biogenesis	2.2e-18	3.85	35	Process
cleavage involved in rRNA processing	4.89e-18	3.53	41	Process
nitrogen compound metabolic process	2.72e-17	1.33	330	Process
peptide metabolic process	4.03e-17	2.1	106	Process
cellular amide metabolic process	3.63e-16	1.98	115	Process
endonucleolytic cleavage involved in rRNA processing	3.94e-16	3.74	33	Process
endonucleolytic cleavage of tricistronic rRNA transcript (SSU-rRNA, 5.8S rRNA, LSU-rRNA)	3.79e-16	3.74	33	Process
cellular macromolecule biosynthetic process	7.19e-16	1.87	130	Process
organonitrogen compound biosynthetic process	8e-16	1.71	161	Process
macromolecule metabolic process	9.16e-16	1.41	269	Process
maturation of LSU-rRNA	4.44e-14	3.61	31	Process
nuclear export	1.04e-13	3.07	41	Process
maturation of SSU-rRNA	2.56e-13	3.24	36	Process
RNA export from nucleus	3.19e-13	3.05	40	Process
RNA transport	5.06e-13	2.81	46	Process
establishment of RNA localization	4.92e-13	2.81	46	Process
macromolecule biosynthetic process	8.13e-13	1.74	131	Process
endonucleolytic cleavage in ITS1 to separate SSU-rRNA from 5.8S rRNA and LSU-rRNA from tricistronic rRNA transcript (SSU-rRNA, 5.8S rRNA, LSU-rRNA)	9.55e-13	3.69	27	Process
nucleic acid transport	1.15e-12	2.76	46	Process
cellular nitrogen compound biosynthetic process	1.94e-12	1.62	154	Process
primary metabolic process	2.96e-12	1.24	339	Process
maturation of SSU-rRNA from tricistronic rRNA transcript (SSU-rRNA, 5.8S rRNA, LSU-rRNA)	6.96e-12	3.25	32	Process
RNA phosphodiester bond hydrolysis, endonucleolytic	8.4e-12	3.13	34	Process
RNA phosphodiester bond hydrolysis	1.07e-11	2.75	43	Process
cellular biosynthetic process	3.38e-11	1.45	202	Process
nucleocytoplasmic transport	5.04e-11	2.55	47	Process
nuclear transport	4.93e-11	2.55	47	Process
ribonucleoprotein complex assembly	6.19e-11	2.57	46	Process
maturation of LSU-rRNA from tricistronic rRNA transcript (SSU-rRNA, 5.8S rRNA, LSU-rRNA)	7.82e-11	3.54	25	Process
biosynthetic process	1.1e-10	1.42	209	Process
ribonucleoprotein complex subunit organization	1.5e-10	2.47	48	Process
organic substance metabolic process	2.09e-10	1.21	348	Process
organic substance biosynthetic process	2.44e-10	1.42	206	Process
ribonucleoprotein complex export from nucleus	2.61e-10	3.52	24	Process
rRNA-containing ribonucleoprotein complex export from nucleus	2.56e-10	3.52	24	Process
ribosomal subunit export from nucleus	2.52e-10	3.52	24	Process
protein export from nucleus	3.73e-10	3.42	25	Process
ribosome localization	1.3e-09	3.4	24	Process
rRNA 5'-end processing	1.88e-09	3.62	21	Process
endonucleolytic cleavage in 5'-ETS of tricistronic rRNA transcript (SSU-rRNA, 5.8S rRNA, LSU-rRNA)	6.91e-09	3.6	20	Process
endonucleolytic cleavage to generate mature 5'-end of SSU-rRNA from (SSU-rRNA, 5.8S rRNA, LSU-rRNA)	6.79e-09	3.6	20	Process
ncRNA 5'-end processing	1.1e-08	3.47	21	Process
RNA 5'-end processing	1.08e-08	3.47	21	Process
nucleobase-containing compound transport	2.52e-08	2.25	47	Process
nucleic acid phosphodiester bond hydrolysis	2.6e-08	2.29	45	Process
cellular metabolic process	1.18e-07	1.17	346	Process
RNA methylation	1.14e-06	3.52	16	Process
ribosomal large subunit assembly	1.91e-06	3.24	18	Process
ribosomal small subunit biogenesis	2.33e-06	3.7	14	Process
rRNA modification	2.3e-06	3.7	14	Process
ribosomal large subunit export from nucleus	3.89e-06	3.5	15	Process
establishment of organelle localization	4.93e-06	2.58	26	Process
RNA modification	6.11e-06	2.61	25	Process
metabolic process	9.41e-06	1.14	350	Process
tRNA metabolic process	1.04e-05	2.16	36	Process
macromolecule methylation	0.000105	2.69	19	Process
cellular amino acid metabolic process	0.000108	1.72	56	Process
maturation of 5.8S rRNA from tricistronic rRNA transcript (SSU-rRNA, 5.8S rRNA, LSU-rRNA)	0.000159	3.4	12	Process
regulation of translational fidelity	0.000182	2.97	15	Process
tRNA methylation	0.000187	3.96	9	Process
cellular component organization or biogenesis	0.000187	1.25	199	Process
protein-containing complex localization	0.000391	2.27	24	Process
maturation of 5.8S rRNA	0.000575	3.17	12	Process
cellular macromolecule metabolic process	0.000792	1.25	186	Process
aspartate family amino acid metabolic process	0.000922	2.31	21	Process
tRNA aminoacylation for protein translation	0.00109	2.7	15	Process
rRNA export from nucleus	0.00133	3.57	9	Process
rRNA transport	0.00132	3.57	9	Process
ribonucleoside metabolic process	0.00148	2.86	13	Process
alpha-amino acid biosynthetic process	0.0022	1.92	30	Process
nucleoside metabolic process	0.00287	2.64	14	Process
methylation	0.00433	2.13	21	Process
translational termination	0.00452	3.52	8	Process
assembly of large subunit precursor of preribosome	0.00447	3.52	8	Process
rRNA methylation	0.00442	3.52	8	Process
amino acid activation	0.00444	2.48	15	Process
tRNA aminoacylation	0.00439	2.48	15	Process
glycosyl compound metabolic process	0.00435	2.48	15	Process
cellular amino acid biosynthetic process	0.0044	1.83	31	Process
ncRNA export from nucleus	0.00449	2.91	11	Process
translational elongation	0.00703	2.58	13	Process
alpha-amino acid metabolic process	0.00807	1.66	39	Process
glycosyl compound biosynthetic process	0.00872	2.64	12	Process
cellular protein-containing complex assembly	0.0102	1.46	62	Process
regulation of translation	0.0102	1.85	27	Process
aspartate family amino acid biosynthetic process	0.0104	2.27	16	Process
cellular protein metabolic process	0.0104	1.27	129	Process
ribonucleoside biosynthetic process	0.0103	2.73	11	Process
nucleoside biosynthetic process	0.0102	2.73	11	Process
regulation of cellular amide metabolic process	0.0101	1.82	28	Process
protein-containing complex subunit organization	0.0118	1.4	75	Process
nucleobase biosynthetic process	0.0134	3.47	7	Process
lysine biosynthetic process via aminoadipic acid	0.0133	3.47	7	Process
organelle localization	0.014	1.75	30	Process
tRNA modification	0.0176	2.31	14	Process
protein-containing complex assembly	0.0182	1.43	63	Process
posttranscriptional regulation of gene expression	0.025	1.75	27	Process

## Sheet: Group 3
Description	FDR q-value	Enrichment	Count	GO
plasma membrane	0.0473	2.1	28	Component
intrinsic component of membrane	0.033	1.73	42	Component
microtubule organizing center	0.0393	6.22	6	Component
spindle pole body	0.0295	6.22	6	Component
site of polarized growth	0.0599	2.59	15	Component
integral component of membrane	0.0579	1.66	39	Component
membrane part	0.0951	1.48	51	Component
chromosome, centromeric region	0.0957	5.66	5	Component
chromosome, centromeric region	0.0957	5.66	5	Component
budding cell bud growth	0.04	7.26	7	Process
cytoskeleton organization	0.0922	3.23	14	Process
cell wall organization or biogenesis	0.0954	3.11	14	Process
cell wall organization	0.0846	3.24	13	Process
external encapsulating structure organization	0.0676	3.24	13	Process
fungal-type cell wall organization or biogenesis	0.0645	3.39	12	Process
organelle organization	0.072	1.78	37	Process
septin ring organization	0.071	6.22	6	Process
cellular component organization	0.136	1.45	61	Process
growth	0.128	3.46	10	Process
fungal-type cell wall organization	0.149	3.36	10	Process
mitotic cell cycle process	0.142	2.79	13	Process
glycine decarboxylation via glycine cleavage system	0.148	12.44	3	Process
chromosome organization	0.153	2.87	12	Process
cell division	0.173	3.19	10	Process
septin cytoskeleton organization	0.234	4.67	6	Process
positive regulation of transport	0.221	4.67	6	Process

## Sheet: Group 4a
Description	FDR q-value	Enrichment	Count	GO
membrane	8.89e-06	1.3	221	Component
membrane part	7.2e-06	1.36	175	Component
vesicle	0.000164	1.9	43	Component
organelle membrane	0.000149	1.39	132	Component
intracellular vesicle	0.000197	1.88	42	Component
cytoplasmic vesicle	0.000164	1.88	42	Component
site of polarized growth	0.00104	1.82	39	Component
cellular bud tip	0.00129	2.31	20	Component
tethering complex	0.00192	2.87	12	Component
plasma membrane bounded cell projection part	0.0018	2.17	22	Component
cell projection part	0.00163	2.17	22	Component
endosome	0.00162	1.94	29	Component
prospore membrane	0.00202	2.61	14	Component
cellular bud neck	0.00211	1.85	32	Component
cell tip	0.00307	2.16	20	Component
endoplasmic reticulum	0.00415	1.43	77	Component
intrinsic component of membrane	0.00458	1.31	118	Component
cytoplasmic vesicle part	0.00901	1.81	28	Component
integral component of membrane	0.0115	1.29	113	Component
mating projection tip	0.0113	2.08	18	Component
nuclear chromosome part	0.0172	1.83	24	Component
GID complex	0.0247	3.35	6	Component
exocyst	0.0236	3.35	6	Component
mitochondrial membrane	0.0309	1.35	73	Component
endoplasmic reticulum part	0.0302	1.45	51	Component
vesicle-mediated transport	2.67e-05	1.8	67	Process
Golgi vesicle transport	0.000884	2.17	31	Process
secretion by cell	0.000723	2.74	18	Process
secretion	0.000542	2.74	18	Process
biological regulation	0.000626	1.25	220	Process
exocytic process	0.000975	3.35	11	Process
post-Golgi vesicle-mediated transport	0.00114	2.55	19	Process
exocytosis	0.00117	2.93	14	Process
regulation of biological process	0.0012	1.28	182	Process
regulation of cellular process	0.0013	1.29	170	Process
cellular protein modification process	0.00131	1.47	90	Process
protein modification process	0.0012	1.47	90	Process
vesicle tethering	0.00153	3.35	10	Process
regulation of transport	0.00271	2.2	23	Process
organelle organization	0.00497	1.38	106	Process
mRNA processing	0.00583	1.94	29	Process
vesicle docking	0.00942	3.05	10	Process
proteolysis	0.00968	1.57	54	Process
regulation of localization	0.00994	1.92	28	Process
negative regulation of cellular carbohydrate metabolic process	0.0122	2.84	11	Process
negative regulation of carbohydrate metabolic process	0.0116	2.84	11	Process
regulation of cellular component organization	0.017	1.5	60	Process
mRNA metabolic process	0.0244	1.66	39	Process
regulation of cellular carbohydrate metabolic process	0.03	2.24	16	Process
regulation of carbohydrate metabolic process	0.0288	2.24	16	Process
protein localization to phagophore assembly site	0.0298	3.35	7	Process
vesicle docking involved in exocytosis	0.0287	3.35	7	Process
regulation of cell wall organization or biogenesis	0.0276	3.35	7	Process
regulation of fungal-type cell wall organization	0.0267	3.35	7	Process
mRNA 3-end processing	0.0278	2.63	11	Process
regulation of carbohydrate biosynthetic process	0.0286	2.42	13	Process
macromolecule modification	0.0381	1.33	94	Process
macromolecule catabolic process	0.0398	1.48	55	Process
negative regulation of small molecule metabolic process	0.0447	2.98	8	Process
negative regulation of gluconeogenesis	0.0434	2.98	8	Process
vesicle organization	0.046	2.19	15	Process
protein modification by small protein conjugation or removal	0.0486	1.74	28	Process
peptide transport	0.0485	1.35	80	Process
double-strand break repair	0.0477	2.24	14	Process
proteolysis involved in cellular protein catabolic process	0.0466	1.59	38	Process
amide transport	0.0456	1.35	81	Process
peptidyl-serine phosphorylation	0.0489	2.29	13	Process
peptidyl-serine modification	0.0477	2.29	13	Process
regulation of vesicle-mediated transport	0.0467	2.29	13	Process
endocytosis	0.049	1.78	25	Process
membrane docking	0.0487	2.58	10	Process
organelle localization by membrane tethering	0.0477	2.58	10	Process
supramolecular fiber organization	0.0476	2.46	11	Process
positive regulation of protein modification by small protein conjugation or removal	0.0534	3.35	6	Process
phospholipid catabolic process	0.0523	3.35	6	Process
regulation of vesicle fusion	0.0513	3.35	6	Process
vesicle tethering involved in exocytosis	0.0503	3.35	6	Process
regulation of organelle organization	0.0511	1.53	42	Process
protein localization	0.0535	1.31	90	Process
cellular component organization	0.0558	1.18	185	Process
protein modification by small protein conjugation	0.0591	1.79	23	Process
cellular response to DNA damage stimulus	0.0634	1.65	30	Process
membrane lipid metabolic process	0.0644	2.13	14	Process
regulation of glucose metabolic process	0.0633	2.13	14	Process
cytosolic transport	0.0622	2.13	14	Process
phospholipase activity	0.102	3.35	8	Function
ubiquitin protein ligase activity	0.0676	2.68	12	Function
ubiquitin-like protein ligase activity	0.0451	2.68	12	Function
phospholipid binding	0.0614	1.91	25	Function
catalytic activity, acting on a protein	0.0719	1.44	65	Function
lipid binding	0.16	1.71	29	Function
phosphatidylinositol binding	0.15	1.92	20	Function

## Sheet: Group 4b
Description	FDR q-value	Enrichment	Count	GO
mitochondrion	3.83e-29	1.71	249	Component
mitochondrial part	6.1e-27	1.96	176	Component
mitochondrial protein complex	3.78e-12	2.23	68	Component
organelle lumen	7.97e-11	1.97	82	Component
intracellular organelle lumen	6.37e-11	1.97	82	Component
membrane-enclosed lumen	5.31e-11	1.97	82	Component
mitochondrial membrane	7.56e-09	1.79	88	Component
cytoplasmic part	3.75e-08	1.17	373	Component
mitochondrial inner membrane	6.85e-07	1.87	62	Component
organelle inner membrane	3.09e-06	1.81	62	Component
mitochondrial intermembrane space	9.77e-06	2.37	29	Component
mitochondrial membrane part	9.51e-06	1.89	50	Component
mitochondrial matrix	1.22e-05	2	42	Component
organelle envelope lumen	5.74e-05	2.22	29	Component
organelle membrane	0.000131	1.39	121	Component
inner mitochondrial membrane protein complex	0.000209	2.14	28	Component
organellar large ribosomal subunit	0.000336	2.49	19	Component
mitochondrial large ribosomal subunit	0.000317	2.49	19	Component
respiratory chain complex IV	0.000322	3.67	9	Component
mitochondrial respiratory chain complex IV	0.00114	3.67	8	Component
peroxisome	0.00219	2.05	24	Component
microbody	0.00209	2.05	24	Component
peroxisomal matrix	0.003	2.89	11	Component
microbody lumen	0.00288	2.89	11	Component
intracellular membrane-bounded organelle	0.00336	1.08	401	Component
tricarboxylic acid cycle enzyme complex	0.006	3.27	8	Component
respiratory chain complex	0.0102	2.34	14	Component
membrane-bounded organelle	0.0103	1.07	404	Component
microbody part	0.0115	2.18	16	Component
peroxisomal part	0.0111	2.18	16	Component
organellar small ribosomal subunit	0.0108	2.39	13	Component
mitochondrial small ribosomal subunit	0.0105	2.39	13	Component
mitochondrial nucleoid	0.0164	2.62	10	Component
nucleoid	0.0159	2.62	10	Component
outer membrane	0.0213	1.84	22	Component
integral component of mitochondrial membrane	0.021	2.01	17	Component
oxidation-reduction process	7.71e-07	2.15	52	Process
mitochondrial translation	6.45e-06	2.34	37	Process
antibiotic metabolic process	5.39e-06	2.53	31	Process
energy derivation by oxidation of organic compounds	3.77e-05	2.26	35	Process
tricarboxylic acid cycle	3.53e-05	2.94	20	Process
citrate metabolic process	2.95e-05	2.94	20	Process
tricarboxylic acid metabolic process	8.19e-05	2.83	20	Process
generation of precursor metabolites and energy	0.000132	1.92	46	Process
small molecule catabolic process	0.00697	1.79	40	Process
energy reserve metabolic process	0.00943	3.11	11	Process
small molecule metabolic process	0.00953	1.31	134	Process
oxidative phosphorylation	0.00913	3.67	8	Process
glycogen metabolic process	0.023	3.06	10	Process
drug metabolic process	0.0287	1.52	58	Process
mitochondrial transmembrane transport	0.0292	2.18	19	Process
response to oxidative stress	0.0347	1.84	29	Process
fatty acid metabolic process	0.0356	2.1	20	Process
glycogen biosynthetic process	0.0417	3.27	8	Process
mitochondrial transport	0.0416	2.03	21	Process
cellular respiration	0.0395	2.03	21	Process
cellular response to oxidative stress	0.0588	1.84	26	Process
aerobic respiration	0.0984	1.99	19	Process
electron transport chain	0.0951	2.08	17	Process
respiratory electron transport chain	0.107	2.24	14	Process
protein localization to mitochondrion	0.113	2.1	16	Process
establishment of protein localization to mitochondrion	0.108	2.1	16	Process
cellular carbohydrate metabolic process	0.135	1.65	31	Process
oxidoreductase activity	0.000485	1.59	82	Function
cytochrome-c oxidase activity	0.0906	3.67	7	Function
oxidoreductase activity, acting on a heme group of donors	0.0604	3.67	7	Function
oxidoreductase activity, acting on a heme group of donors, oxygen as acceptor	0.0453	3.67	7	Function
heme-copper terminal oxidase activity	0.0362	3.67	7	Function
oxidoreductase activity, acting on a sulfur group of donors	0.0476	2.45	14	Function
electron transfer activity	0.23	2.12	15	Function
