# Supplementary material for: The metabolite-controlled ubiquitin conjugase Ubc8 promotes mitochondrial protein import
Source: Life Sci Alliance. 2022 Oct 17;6(1):e202201526. doi: 10.26508/lsa.202201526 (PMC9579816; doi:10.26508/lsa.202201526)
Supplement: Supplementary file 9 [file LSA-2022-01526_SdataFS4.xlsx]

## Sheet: MS Data Methylglyoxal (Fig.S4A)
Methylglyoxal measurement after shifting cells for 1 hour from 0.2% to 2% glucose
			Area 2-MQ (m/z 144.1 -> 77.1)			Area d4-2-MQ (m/z 149.1 -> 81.1)
Sample type	Sample name	Replicate	Measurement 1	Measurement 2	Measurement 3	Measurement 1	Measurement 2	Measurement 3
Sample	WT	1	7970	11600	14700	10100	10200	10700
Sample	Dubc8	1	9130	12700	16600	10600	10100	10400
Sample	Dglo1	1	11600	16400	20900	10100	10500	10600
Sample	Dubc8Dglo1	1	10100	15500	20500	10900	10300	10000
Sample	WT	2	9170	12300	15100	10500	10400	9860
Sample	Dubc8	2	9050	13000	16900	10800	9790	10000
Sample	Dglo1	2	11200	15800	20300	11200	10600	10200
Sample	Dubc8Dglo1	2	10800	16000	20300	10300	10100	10100
Sample	WT	3	9830	13900	17800	9770	10800	10300
Sample	Dubc8	3	11000	15800	19100	10700	10000	10400
Sample	Dglo1	3	13100	19400	23300	10500	10600	10100
Sample	Dubc8Dglo1	3	12100	18100	23000	10400	10600	10600
Standard	0 nm MG	1	1040	1110	1040	10800	10200	9700
Standard	36 nM MG	1	5220	5240	5730	11100	10900	10900
Standard	73 nM MG	1	9660	9470	10100	11200	11500	11400
Standard	145 nM MG	1	18200	18600	18800	11100	11200	11300
Standard	218 nM MG	1	27200	28400	27900	11000	11500	11500
Standard	291 nM MG	1	35900	35600	36600	11200	11000	11300
Standard	364 nM MG	1	44700	45400	44400	11000	11800	11800
Standard	545 nM MG	1	66300	67700	67300	11200	11100	11600
Standard	873 nM MG	1	107000	107000	109000	11100	11100	11500
Standard	1091 nM MG	1	137000	134000	132000	10400	11000	11400

## Sheet: MS Data Methylglyoxal (Fig.S4B)
Methylglyoxal measurement after shifting cells for 1 hour from 0.2% to 2% glucose
			Area 2-MQ (m/z 144.1 -> 77.1)		Area d4-2-MQ (m/z 149.1 -> 81.1)
Sample type	Sample name	Replicate	Measurement 1	Measurement 2	Measurement 1	Measurement 2
Sample	WT	1	8180	9340	6350	7000
Sample	Dubc8	1	6340	7460	6140	7400
Sample	Dglo1	1	7610	8880	5810	7000
Sample	Dubc8Dglo1	1	6440	7060	6150	6780
Sample	WT	2	7280	7950	5550	6520
Sample	Dubc8	2	6150	7690	6090	7260
Sample	Dglo1	2	8210	10300	6700	7250
Sample	Dubc8Dglo1	2	6460	7150	6510	6770
Sample	WT	3	7240	8020	6390	6760
Sample	Dubc8	3	7380	8570	8310	7780
Sample	Dglo1	3	7620	9170	6600	7060
Sample	Dubc8Dglo1	3	7300	8370	8000	7130
Standard	0 nm MG	1	785	1080	6650	7450
Standard	36 nM MG	1	5180	5180	7550	7000
Standard	73 nM MG	1	7770	7770	7870	7940
Standard	145 nM MG	1	19400	20600	7520	7550
Standard	218 nM MG	1	28200	28900	7510	7400
Standard	291 nM MG	1	36800	37100	7680	7720
Standard	364 nM MG	1	45100	45700	7260	7580
Standard	545 nM MG	1	64800	67700	7060	7360
Standard	873 nM MG	1	105000	107000	8280	7960
Standard	1091 nM MG	1	131000	135000	7880	7310
