# Supplementary material for: The metabolite-controlled ubiquitin conjugase Ubc8 promotes mitochondrial protein import
Source: Life Sci Alliance. 2022 Oct 17;6(1):e202201526. doi: 10.26508/lsa.202201526 (PMC9579816; doi:10.26508/lsa.202201526)
Supplement: Supplementary file 14 [file LSA-2022-01526_SdataFS6.1.xlsx]

## Sheet: qPCR UBC8 (Fig.S6A)
Replicate 1					Replicate 2					Replicate 3
Fluor.	Target	Sample	Cq		Fluor.	Target	Sample	Cq		Fluor.	Target	Sample	Cq
SYBR	ACT1	WT+ev	13.1744		SYBR	ACT1	WT+ev	13.1773		SYBR	ACT1	WT+ev	13.4621
SYBR	ACT1	WT+ev	13.0756		SYBR	ACT1	WT+ev	13.1134		SYBR	ACT1	WT+ev	13.3729
SYBR	ACT1	WT+ev	13.045		SYBR	ACT1	WT+ev	13.0845		SYBR	ACT1	WT+ev	13.4181
SYBR	UBC8	WT+ev	18.6933		SYBR	UBC8	WT+ev	18.6257		SYBR	UBC8	WT+ev	18.8402
SYBR	UBC8	WT+ev	18.4877		SYBR	UBC8	WT+ev	18.4783		SYBR	UBC8	WT+ev	18.7529
SYBR	UBC8	WT+ev	18.3745		SYBR	UBC8	WT+ev	18.5208		SYBR	UBC8	WT+ev	18.7939
SYBR	ACT1	WT+Ubc8	13.3442		SYBR	ACT1	WT+Ubc8	12.967		SYBR	ACT1	WT+Ubc8	13.4152
SYBR	ACT1	WT+Ubc8	13.3771		SYBR	ACT1	WT+Ubc8	12.9618		SYBR	ACT1	WT+Ubc8	13.3999
SYBR	ACT1	WT+Ubc8	13.3447		SYBR	ACT1	WT+Ubc8	12.9111		SYBR	ACT1	WT+Ubc8	13.4534
SYBR	UBC8	WT+Ubc8	11.0226		SYBR	UBC8	WT+Ubc8	10.6671		SYBR	UBC8	WT+Ubc8	11.1497
SYBR	UBC8	WT+Ubc8	10.9326		SYBR	UBC8	WT+Ubc8	10.6428		SYBR	UBC8	WT+Ubc8	11.0608
SYBR	UBC8	WT+Ubc8	10.9718		SYBR	UBC8	WT+Ubc8	10.6903		SYBR	UBC8	WT+Ubc8	11.1015
