# Supplementary material for: The metabolite-controlled ubiquitin conjugase Ubc8 promotes mitochondrial protein import
Source: Life Sci Alliance. 2022 Oct 17;6(1):e202201526. doi: 10.26508/lsa.202201526 (PMC9579816; doi:10.26508/lsa.202201526)
Supplement: Supplementary file 17 [file LSA-2022-01526_TableS4.xlsx]

## Sheet: S4_Legend
log2 ()	log2 fold change of protein intensities
p-value.adjusted	p-values were adjusted for multiple testing using the methods described by Benjamini and Hochberg (Benjamini and Hochberg, 1995)
WT_glucose	Wild-type cells continously grown in glycerol medium
ubc8_glucose	Dubc8 cells continously grown in glycerol medium
WT_galactose	Wild-type cells continously grown in glycerol medium
ubc8_galactose	Dubc8 cells continously grown in glycerol medium
WT_lactate	Wild-type cells continously grown in lactate medium
ubc8_lactate	Dubc8 cells continously grown in lactate medium

## Sheet: comparison_glucose (Fig.S7B)
UniprotID	StdName	SysName	log2 (ubc8_glucose/ WT_glucose)	p-value.adjusted (ubc8_glucose/ WT_glucose)
YFR015C	GSY1	YFR015C	4.41477226162317	1.06989416779252e-13
YPR160W	GPH1	YPR160W	2.28155360938871	1.52749348157531e-13
YGR248W	SOL4	YGR248W	3.42448041588915	1.71878904067423e-13
YDL223C	HBT1	YDL223C	3.62213811866597	2.58766383161863e-13
YGR088W	CTT1	YGR088W	2.46313046523707	5.87011917924846e-12
YIL136W	OM45	YIL136W	1.80319624014241	2.20120579367582e-11
YNL160W	YGP1	YNL160W	2.86034031376133	4.28391581630379e-11
YMR105C	PGM2	YMR105C	1.48514205950324	9.48086961076982e-11
YFR053C	HXK1	YFR053C	1.43908706887009	1.71145611270393e-10
YMR169C	ALD3	YMR169C	1.77401242132226	1.85381276570937e-10
YOL126C	MDH2	YOL126C	1.67323348707268	3.17820450297006e-10
YOR222W	ODC2	YOR222W	-1.89616672951306	2.23090308860462e-09
YKL029C	MAE1	YKL029C	1.4802930774276	1.60628810054858e-09
YGR234W	YHB1	YGR234W	-1.16091768309338	1.81739879198634e-09
YMR250W	GAD1	YMR250W	1.3846403284946	2.14935021364288e-09
YML100W	TSL1	YML100W	0.981387860642052	2.25349896420446e-09
YML128C	MSC1	YML128C	1.47364800500967	5.51271654393376e-09
YGR244C	LSC2	YGR244C	1.10967272765626	6.25335622509602e-09
YDL204W	RTN2	YDL204W	2.34563119073599	1.04884494513274e-08
YDR516C	EMI2	YDR516C	0.944400438289435	1.05234687138532e-08
YGR019W	UGA1	YGR019W	0.805488492615925	2.40425703932461e-08
YMR196W		YMR196W	2.38285232886517	2.68859083045765e-08
YDL209C	CWC2	YDL209C	-0.887898945920274	2.9715503406832e-08
YLR258W	GSY2	YLR258W	0.915228844687928	3.4206695654191e-08
YKL151C		YKL151C	1.02006307386647	5.65283625627756e-08
YNL037C	IDH1	YNL037C	0.750904315505906	8.46645731503746e-08
YGL037C	PNC1	YGL037C	0.907634790973429	1.02909698391537e-07
YLR178C	TFS1	YLR178C	1.08591286534935	1.10880961431136e-07
YOR173W	DCS2	YOR173W	2.57683721118944	1.51176399526647e-07
YCL040W	GLK1	YCL040W	0.848894786199175	1.5443867425653e-07
YOR136W	IDH2	YOR136W	0.857077957350576	2.81179081141705e-07
YLL026W	HSP104	YLL026W	0.499812413564836	3.49156192801084e-07
YDR423C	CAD1	YDR423C	-1.06995300882225	0.000775100994495639
YDR074W	TPS2	YDR074W	0.655913470974848	4.6378599505692e-07
YDR001C	NTH1	YDR001C	0.512038412540242	4.85986358566018e-07
YIR038C	GTT1	YIR038C	0.668972310497008	4.93983388478655e-07
YLR270W	DCS1	YLR270W	0.641042086438222	5.90246654719182e-07
YKL150W	MCR1	YKL150W	0.602797437830343	7.16360331995071e-07
YBR126C	TPS1	YBR126C	0.696681441441481	7.50560214863584e-07
YHL021C	AIM17	YHL021C	1.27602430878736	8.32575667852745e-07
YNR001C	CIT1	YNR001C	0.701657573272399	8.6467899671755e-07
YJR096W		YJR096W	0.885581703101145	9.44915053741982e-07
YKR049C	FMP46	YKR049C	0.699306664342707	1.18037337697147e-06
YBR006W	UGA2	YBR006W	1.12483096395388	1.5278306073427e-06
YBR214W	SDS24	YBR214W	0.939352666410119	1.61610424470384e-06
YDR231C	COX20	YDR231C	0.739673696275386	1.85324013175104e-06
YBR149W	ARA1	YBR149W	0.609271087579625	1.9952049318146e-06
YNR050C	LYS9	YNR050C	0.452698469920925	2.29571959894159e-06
YJR042W	NUP85	YJR042W	-0.544704805975847	2.51747556920126e-06
YFL014W	HSP12	YFL014W	0.968497517837125	2.90592888153097e-06
YAL060W	BDH1	YAL060W	0.659298318463645	3.87150607800926e-06
YIR007W	EGH1	YIR007W	1.29203456160937	4.13469363931833e-06
YOR120W	GCY1	YOR120W	0.631381041515176	4.57983779652675e-06
YDL022W	GPD1	YDL022W	0.497261749741188	5.60575736212947e-06
YNL183C	NPR1	YNL183C	0.493923631006723	5.76450887794714e-06
YDR216W	ADR1	YDR216W	-1.30208154669338	6.74050853006763e-06
YBR169C	SSE2	YBR169C	0.656900983398408	8.50520539922168e-06
YJL217W	REE1	YJL217W	0.918299872325665	9.18612163506345e-06
YGR194C	XKS1	YGR194C	0.62241156784367	9.46286569722526e-06
YDR222W		YDR222W	1.39811693167782	6.56349804411099e-05
YOR230W	WTM1	YOR230W	0.553819783676492	1.05639981372219e-05
YHR104W	GRE3	YHR104W	0.407122333465548	1.23653808365527e-05
YAL025C	MAK16	YAL025C	-0.629864143813123	1.24356761394989e-05
YGL236C	MTO1	YGL236C	1.00889454742539	2.05632130372676e-05
YIL135C	VHS2	YIL135C	0.661472376402017	1.38594488894165e-05
YGL227W	VID30	YGL227W	0.748519606468967	1.39112379787769e-05
YLR089C	ALT1	YLR089C	0.489846606443269	1.46563425761142e-05
YAL034W-A	MTW1	YAL034W-A	-0.656592673737542	1.87535805882631e-05
YMR286W	MRPL33	YMR286W	0.464380883256041	1.91666063264638e-05
YJR025C	BNA1	YJR025C	0.552078920360888	2.02277256202634e-05
YGL101W		YGL101W	-0.458913070374809	2.02455815095751e-05
YGR175C	ERG1	YGR175C	-0.613173347562896	2.15121471857027e-05
YDL046W	NPC2	YDL046W	0.664087767642112	2.18933308479996e-05
YLR383W	SMC6	YLR383W	-0.682605648147739	7.61704427586606e-05
YHR016C	YSC84	YHR016C	0.473125308257252	2.24691484174017e-05
YEL066W	HPA3	YEL066W	0.787117325884331	2.30392149186413e-05
YDL124W		YDL124W	0.706458703802454	2.31692159779005e-05
YMR041C	ARA2	YMR041C	0.844149536001979	5.16370334580214e-05
YIL009W	FAA3	YIL009W	-0.660819674684049	2.4139416055985e-05
YNL115C		YNL115C	0.681641939196307	2.46404784348636e-05
YOR285W	RDL1	YOR285W	0.497149283289342	2.50100497637895e-05
YPL004C	LSP1	YPL004C	0.480772893376287	2.85333844126767e-05
YER175C	TMT1	YER175C	0.765145505394536	4.15283314553218e-05
YOR153W	PDR5	YOR153W	-0.638807138486712	2.9008493363056e-05
YDR059C	UBC5	YDR059C	0.994484668830438	6.24451822338962e-05
YDR204W	COQ4	YDR204W	0.769374678856924	2.98108271612127e-05
YDR096W	GIS1	YDR096W	-0.883780556919806	4.39185000756532e-05
YKL138C	MRPL31	YKL138C	0.696433374260828	4.46187504085285e-05
YDR044W	HEM13	YDR044W	0.55744956617108	3.18899244503145e-05
YHR087W	RTC3	YHR087W	2.02297823473624	3.21021026660693e-05
YNL055C	POR1	YNL055C	0.482957131736363	3.26513638442516e-05
YMR090W		YMR090W	1.0113891163759	3.27268803207233e-05
YML098W	TAF13	YML098W	-0.59673328775963	7.78813087171825e-05
YDR453C	TSA2	YDR453C	1.38068101454088	5.37757775684158e-05
YBR230C	OM14	YBR230C	0.847025272430159	3.87236697435785e-05
YLR363W-A		YLR363W-A	-0.626228189521949	3.94207464558936e-05
YOR038C	HIR2	YOR038C	-0.820051538798339	5.8150687675967e-05
YGL062W	PYC1	YGL062W	0.618604016844202	4.35165212134355e-05
YBL015W	ACH1	YBL015W	0.665737806753782	4.67482801330558e-05
YHR198C	AIM18	YHR198C	0.549740114987642	5.08278646665821e-05
YML126C	ERG13	YML126C	-0.315796426587596	5.20763142247687e-05
YDR032C	PST2	YDR032C	0.508661882103151	5.21807196943769e-05
YDL188C	PPH22	YDL188C	0.529570180561588	5.49641206639484e-05
YNL002C	RLP7	YNL002C	-0.327597493896459	5.95209768680916e-05
YJL036W	SNX4	YJL036W	0.352802812645837	6.45877131444749e-05
YGL222C	EDC1	YGL222C	-0.654310820632581	9.40240323926956e-05
YOR359W	VTS1	YOR359W	0.537605098386432	7.29465646026961e-05
YPR035W	GLN1	YPR035W	0.344689170541809	7.33974695105254e-05
YDR171W	HSP42	YDR171W	0.694940010859924	7.63569074628291e-05
YHR038W	RRF1	YHR038W	0.453357511523965	7.80187972253193e-05
YJL189W	RPL39	YJL189W	0.652674047277447	7.86726296831282e-05
YLR439W	MRPL4	YLR439W	0.526281117123833	7.87098292164276e-05
YKL035W	UGP1	YKL035W	0.358974985110891	7.90049133388196e-05
YFR014C	CMK1	YFR014C	0.493864936424465	8.0327608979639e-05
YEL011W	GLC3	YEL011W	0.886483170022341	8.06495788647597e-05
YML070W	DAK1	YML070W	0.343985257550344	8.51612640802542e-05
YOR210W	RPB10	YOR210W	0.642637307097679	8.55723849620309e-05
YGL256W	ADH4	YGL256W	-0.431389327782789	9.54214729805538e-05
YKL167C	MRP49	YKL167C	0.615109170500734	0.000100048513902964
YHR216W	IMD2	YHR216W	-0.812107710306151	0.00010986941610173
YNL124W	NAF1	YNL124W	-0.569225683418896	0.000110853042127586
YOR221C	MCT1	YOR221C	0.471842345481932	0.00011411968167945
YER148W	SPT15	YER148W	-0.398733030252853	0.000119235789514563
YJL052W	TDH1	YJL052W	1.30467625102717	0.000139481348630971
YNL075W	IMP4	YNL075W	-0.363960666767941	0.000139513582924554
YKR076W	ECM4	YKR076W	1.12979239678566	0.000259331351061895
YJR016C	ILV3	YJR016C	-0.281115940144531	0.000154550255702482
YKL117W	SBA1	YKL117W	0.524297947296855	0.000157207121133899
YNL231C	PDR16	YNL231C	-0.422642824458777	0.000161190659263303
YGR008C	STF2	YGR008C	0.917258860393186	0.000166064914761673
YGR163W	GTR2	YGR163W	0.592279042839248	0.000292333810868223
YDR342C	HXT7	YDR342C	0.719707575131466	0.000169018099968778
YMR291W	TDA1	YMR291W	0.603342177420664	0.00017249649392758
YOR175C	ALE1	YOR175C	0.412052070401458	0.000172594472290699
YOR374W	ALD4	YOR374W	0.521510666779239	0.000172669150927467
YNR028W	CPR8	YNR028W	-0.470947238777676	0.000175024883118219
YPL082C	MOT1	YPL082C	-0.293154601593624	0.000175621333490642
YKL129C	MYO3	YKL129C	0.427226720718249	0.000180072103054567
YKL157W	APE2	YKL157W	0.300629828911735	0.000183968754200336
YCL031C	RRP7	YCL031C	-0.475669213180328	0.000187306791439007
YHR001W	OSH7	YHR001W	0.275468900491049	0.000197102402752683
YMR008C	PLB1	YMR008C	0.469443571012974	0.000197591778510513
YGR254W	ENO1	YGR254W	0.406111771249876	0.000200148119961121
YAL017W	PSK1	YAL017W	0.303810617863562	0.000207691467994556
YLR134W	PDC5	YLR134W	0.361890752107147	0.000666418168555244
YBR056W		YBR056W	0.341698104468055	0.000214099458322626
YMR028W	TAP42	YMR028W	0.599706275926525	0.000217685881155666
YNL265C	IST1	YNL265C	0.413513061964117	0.000220691714797621
YER103W	SSA4	YER103W	0.657259343645912	0.000236812874701079
YNL133C	FYV6	YNL133C	-0.691281985102197	0.000402558896763383
YEL020W-A	TIM9	YEL020W-A	-0.45715192017844	0.000244181646746264
YDR083W	RRP8	YDR083W	-0.48081436514153	0.000245352750157711
YIR034C	LYS1	YIR034C	0.471486707838082	0.000254384210721722
YOR150W	MRPL23	YOR150W	0.621696875921497	0.000265970919563496
YKL096W	CWP1	YKL096W	-0.697805761665386	0.000269307161185173
YBR221C	PDB1	YBR221C	0.339819652483612	0.000269755075054904
YHR011W	DIA4	YHR011W	1.12709479967253	0.000455452084181386
YHR088W	RPF1	YHR088W	-0.35158325091081	0.00028221420519411
YLL036C	PRP19	YLL036C	0.448516619500303	0.000293886252137536
YNL239W	LAP3	YNL239W	0.33685027697771	0.00029495848602906
YDR084C	TVP23	YDR084C	-0.722620090228247	0.000876786681899817
YDR033W	MRH1	YDR033W	0.293222278875469	0.000300672109172256
YOR375C	GDH1	YOR375C	0.367324035840703	0.000302956041888399
YOR054C	VHS3	YOR054C	0.488920104872321	0.000311224227747954
YPL133C	RDS2	YPL133C	-0.469747801118064	0.000392339421481278
YER081W	SER3	YER081W	0.749487149036444	0.000329188197575942
YGR268C	HUA1	YGR268C	0.707505862059399	0.000333676600234842
YDR258C	HSP78	YDR258C	0.303263476096031	0.000357909299823361
YOL055C	THI20	YOL055C	0.472712856757305	0.000362595932939615
YLR005W	SSL1	YLR005W	0.421873943294589	0.00036818758829603
YPR175W	DPB2	YPR175W	0.548224545676888	0.000398320686274951
YPL116W	HOS3	YPL116W	0.365598793507409	0.000402693472218712
YBR244W	GPX2	YBR244W	-0.381034235030672	0.000418355365857689
YJR148W	BAT2	YJR148W	0.643087110180481	0.000420351404391255
YDR380W	ARO10	YDR380W	0.346970057537835	0.000426450068621297
YIL065C	FIS1	YIL065C	0.358163947025492	0.000428993795945068
YHR069C	RRP4	YHR069C	-0.301335826723864	0.000434229453029183
YBR137W		YBR137W	0.500949027733153	0.000452584102409901
YHR094C	HXT1	YHR094C	0.485208209861408	0.00583741755007343
YNL200C		YNL200C	0.493426266474874	0.000484353810371859
YKL040C	NFU1	YKL040C	-0.419130366203067	0.000484836621474576
YLR450W	HMG2	YLR450W	0.416907215925306	0.000502625331377715
YGL156W	AMS1	YGL156W	1.71906627124392	0.000503962865367756
YEL001C	IRC22	YEL001C	-0.575554349651785	0.000510053733206098
YAL039C	CYC3	YAL039C	1.39408387949609	0.000632865135840742
YBR035C	PDX3	YBR035C	0.333454160288877	0.000532917875739797
YMR211W	DML1	YMR211W	-0.633395772421608	0.00137421204714278
YNL111C	CYB5	YNL111C	-0.981043464727684	0.000544040805891867
YJL068C		YJL068C	0.34753412089303	0.00054438766599175
YKL192C	ACP1	YKL192C	-0.640073842983409	0.000556098739361437
YDR179C	CSN9	YDR179C	0.921155445305288	0.0209534073833835
YLR438W	CAR2	YLR438W	0.629285838510288	0.000581033096025041
YER067W	RGI1	YER067W	0.663176472779103	0.000582729415934778
YKL003C	MRP17	YKL003C	0.641735551977348	0.000583280860089562
YBR046C	ZTA1	YBR046C	0.447976335096332	0.000609983095058298
YOL140W	ARG8	YOL140W	-0.563884781054536	0.000636721908310847
YKL103C	APE1	YKL103C	0.301438548119023	0.000638727502999589
YLR226W	BUR2	YLR226W	-0.506522190085182	0.000972217734710214
YMR315W		YMR315W	0.399869470643015	0.00064795299433307
YHR214C-B		YHR214C-B	0.724463979271679	0.00683314664712967
YDR051C	DET1	YDR051C	-0.34947616544428	0.000652539136336324
NA	NA	NA	0.354153181621356	0.000663448148603351
YHR062C	RPP1	YHR062C	-0.301209050238899	0.000679274522899993
YPL213W	LEA1	YPL213W	0.505948395138347	0.000688985123246267
YGL006W	PMC1	YGL006W	0.385253416941392	0.000692770818365194
YPL226W	NEW1	YPL226W	-0.241900413539327	0.000704188828571454
YBL069W	AST1	YBL069W	0.401407912942794	0.000711299557536242
YNL246W	VPS75	YNL246W	0.487806166185795	0.000740588168444238
YDR111C	ALT2	YDR111C	-0.60101637013263	0.00075248739785466
YOL151W	GRE2	YOL151W	-0.395115069902921	0.000760612425418234
YDR101C	ARX1	YDR101C	-0.280809084206172	0.000761194910546263
YJL167W	ERG20	YJL167W	-0.265017838393469	0.000773809703799972
YOR163W	DDP1	YOR163W	0.244018140432235	0.000790840777952419
YPR127W		YPR127W	0.457821478546961	0.000853422722008133
YDR055W	PST1	YDR055W	0.625258757466234	0.0008568483244509
YKL024C	URA6	YKL024C	-0.280580125686186	0.000861261660277137
YPL227C	ALG5	YPL227C	-0.591558849084187	0.00088460032690618
YBR085W	AAC3	YBR085W	0.463637205248091	0.013227772894394
YDL174C	DLD1	YDL174C	0.327007620418375	0.000931811088458897
YPL031C	PHO85	YPL031C	0.314587954820304	0.000944601618855276
YBR139W		YBR139W	0.357159176464165	0.000973103331050054
YIL130W	ASG1	YIL130W	-0.404171272853397	0.000977219091444088
YMR033W	ARP9	YMR033W	-0.294712673687911	0.000986263994152023
YLR201C	COQ9	YLR201C	0.387951817949912	0.000990527643039743
YOL144W	NOP8	YOL144W	-0.332489047848838	0.000996874151044204
YOR283W		YOR283W	-0.353630948203481	0.000998460548852138
YKR006C	MRPL13	YKR006C	-0.441313073231942	0.00103354879115753
YOL148C	SPT20	YOL148C	-0.615281805022583	0.00104271025983052
YMR261C	TPS3	YMR261C	0.272411107984908	0.00106783149036633
YDR198C	RKM2	YDR198C	0.588639293280746	0.0258089558173283
YNL061W	NOP2	YNL061W	-0.235014888263752	0.00109081535449736
YKL168C	KKQ8	YKL168C	0.462043457201617	0.00110042582963782
YJL081C	ARP4	YJL081C	-0.307630835288141	0.00111169004941136
YER182W	FMP10	YER182W	0.572016364843027	0.0011230096649801
YBR106W	PHO88	YBR106W	0.271678820511248	0.00114803243527646
YBR126W-A		YBR126W-A	0.496734935128146	0.00114995095080331
YPL247C		YPL247C	0.432723267133508	0.00118493279741499
YBL064C	PRX1	YBL064C	0.418738085381708	0.00122298314251632
YDL125C	HNT1	YDL125C	0.347592849271479	0.00122663609909412
YOR176W	HEM15	YOR176W	0.41261789367179	0.00122937902631987
YDR041W	RSM10	YDR041W	-0.452188132157261	0.00123549330783896
YNL074C	MLF3	YNL074C	0.471217585877984	0.00269374506688805
YOR196C	LIP5	YOR196C	-0.261372496049063	0.00126568433918153
YDR153C	ENT5	YDR153C	-0.231798890996448	0.00127697017062539
YLR382C	NAM2	YLR382C	0.627449539549403	0.00134294997247322
YGL009C	LEU1	YGL009C	0.337059796245708	0.00135828243733729
YEL037C	RAD23	YEL037C	-0.275956293802285	0.00137200918878095
YCR046C	IMG1	YCR046C	0.44895099206866	0.00138127213034858
YBR246W	RRT2	YBR246W	0.39193522720478	0.00239075078082641
YGL153W	PEX14	YGL153W	-0.273946495280143	0.00142180102908331
YBL028C		YBL028C	-0.593147063959641	0.00142682962625291
YLR449W	FPR4	YLR449W	-0.367985123717446	0.00147240163541483
YPL070W	MUK1	YPL070W	0.60081711461174	0.00173251434661708
YLR196W	PWP1	YLR196W	-0.26359056098816	0.00148994033539045
YHR102W	KIC1	YHR102W	-0.418473803131683	0.00149448022354665
YBR231C	SWC5	YBR231C	-0.559140059221189	0.00177341882316315
YDL215C	GDH2	YDL215C	0.318389389913548	0.00153788646943747
YJR003C	MRX12	YJR003C	-0.312044042978851	0.00158533794236213
YLR355C	ILV5	YLR355C	0.303396980692249	0.0016005193368852
YER008C	SEC3	YER008C	-0.216531439215977	0.00160374956108399
YHR037W	PUT2	YHR037W	0.258997804163617	0.00161279479206126
YMR015C	ERG5	YMR015C	-0.410125951142849	0.00161560063862993
YBR029C	CDS1	YBR029C	-0.689066354531626	0.00161599775503768
YJL102W	MEF2	YJL102W	0.735318613815078	0.00162889801244787
YML075C	HMG1	YML075C	-0.248399139230575	0.00163426389246786
YNL104C	LEU4	YNL104C	0.222680358086034	0.00165828118838165
YHR147C	MRPL6	YHR147C	-0.470599150336923	0.00170010136866782
YNL241C	ZWF1	YNL241C	0.270631946862917	0.00170605538564436
YDL137W	ARF2	YDL137W	0.705642931089102	0.00199215481693127
YHR097C		YHR097C	0.366702518619753	0.00175149948045713
YDL021W	GPM2	YDL021W	0.675626252360203	0.00177958335164108
YAL044C	GCV3	YAL044C	0.481973684439332	0.00181391064976902
YPL067C		YPL067C	-0.549711490583558	0.00181816190207961
YJR112W	NNF1	YJR112W	-0.356437633494124	0.00184918545558292
YLR128W	DCN1	YLR128W	0.61179880817005	0.00225806988720093
YEL032W	MCM3	YEL032W	-0.259245269364918	0.00199231757291295
YDR011W	SNQ2	YDR011W	-0.285346441154243	0.00199768764940483
YGR245C	SDA1	YGR245C	-0.277156469824462	0.00200293720652538
YIR035C		YIR035C	0.494433769139533	0.00202025968354356
YDR087C	RRP1	YDR087C	-0.35958778661756	0.00204911295873127
YGR084C	MRP13	YGR084C	0.27520627747732	0.00205625142912447
YKL218C	SRY1	YKL218C	0.60909962062523	0.00401462926330966
YGL125W	MET13	YGL125W	0.580936375698776	0.00238753413833389
YER070W	RNR1	YER070W	-0.279268893337985	0.00207891069392255
YJR074W	MOG1	YJR074W	0.428078080378132	0.00240655922361822
YGR222W	PET54	YGR222W	0.348478519107974	0.00210119528363622
YDR049W	VMS1	YDR049W	0.343116113525081	0.00210176085342352
YDR283C	GCN2	YDR283C	-0.34047527050695	0.00210275091017847
YBR286W	APE3	YBR286W	0.277678313301308	0.00210475236364184
YJR109C	CPA2	YJR109C	0.399977700073542	0.00214013719055147
YNL100W	MIC27	YNL100W	0.422692235719158	0.00214150109207335
YDR533C	HSP31	YDR533C	0.445960257794891	0.00214607025389316
YMR246W	FAA4	YMR246W	0.233232297511979	0.00215675351659818
NA	NA	NA	-0.335453580762788	0.00218623569718415
YHR186C	KOG1	YHR186C	-0.299253211854108	0.00218844252206215
YNR046W	TRM112	YNR046W	-0.379361488376261	0.0022378618547898
YDR477W	SNF1	YDR477W	0.252221642358549	0.00224131193813741
YMR297W	PRC1	YMR297W	0.316996943076401	0.00229070030601607
YKL193C	SDS22	YKL193C	0.301903305388652	0.00231166451405265
YKR025W	RPC37	YKR025W	-0.38101598833596	0.0023502790052249
YIL007C	NAS2	YIL007C	0.461870883949487	0.00236980241551044
YER163C	GCG1	YER163C	0.438162693823067	0.00238408765954337
YER156C		YER156C	-0.249286835134637	0.0023920135321583
YML032C	RAD52	YML032C	-0.376711422617223	0.00240799362615688
YOR252W	TMA16	YOR252W	-0.491310518861621	0.00241575259999566
YPL146C	NOP53	YPL146C	-0.313320905000261	0.00242807686709671
YLR027C	AAT2	YLR027C	0.207945703048978	0.00243545824244405
YLR455W	PDP3	YLR455W	-0.499738610259421	0.00243695983400527
YIR005W	IST3	YIR005W	0.568678926492343	0.00279945983954813
YMR011W	HXT2	YMR011W	-0.340078611616519	0.0138034962495644
YLR191W	PEX13	YLR191W	0.473169718981556	0.00290737765931816
YCR083W	TRX3	YCR083W	0.423494042289214	0.00257777611317782
YNL274C	GOR1	YNL274C	0.500053741611026	0.00266335605949412
YJL172W	CPS1	YJL172W	0.270795419598404	0.00270004571278046
YKL205W	LOS1	YKL205W	0.332558522507721	0.00270274593216591
YPR052C	NHP6A	YPR052C	-0.45834414377352	0.00273245695494575
YML088W	UFO1	YML088W	0.389877726934046	0.0064244813430056
YER075C	PTP3	YER075C	0.362730483233417	0.00290297742918113
YLL006W	MMM1	YLL006W	-0.476161790414967	0.00826659337859584
YCL011C	GBP2	YCL011C	-0.228477074323749	0.00294730031980184
YER006W	NUG1	YER006W	-0.242254876365134	0.00295029478169784
YML111W	BUL2	YML111W	-0.453198468878135	0.002991013036069
YGL035C	MIG1	YGL035C	-0.345898612797999	0.00303294771535096
YOR272W	YTM1	YOR272W	-0.262373635202859	0.00311843790782402
YIL124W	AYR1	YIL124W	0.245498998903965	0.00313345939692822
YER082C	UTP7	YER082C	-0.266363476944377	0.003182638160395
YGR255C	COQ6	YGR255C	0.452609661307999	0.00318428818972824
YIL026C	IRR1	YIL026C	0.281582461037363	0.0032124486165473
YBR030W	RKM3	YBR030W	-0.361036649125204	0.00325845237294187
YCR028C-A	RIM1	YCR028C-A	0.293915915797701	0.00332739009984335
YPL145C	KES1	YPL145C	0.230080963814483	0.00332900616952832
YNL153C	GIM3	YNL153C	-0.244920018694568	0.00332943831849166
YDR119W	VBA4	YDR119W	-0.339587139566838	0.00342134526082005
YHR074W	QNS1	YHR074W	0.233269026090035	0.00347719920401432
YKR007W	MEH1	YKR007W	-0.322541429623826	0.00351055857867763
YBL018C	POP8	YBL018C	0.713252316828424	0.003512874887849
YKL194C	MST1	YKL194C	0.218583686231675	0.00352321375161595
YDL098C	SNU23	YDL098C	-0.397125814158375	0.00355171910803221
YGR081C	SLX9	YGR081C	-0.51112370878235	0.0036188838179333
YCR047C	BUD23	YCR047C	-0.325949245949538	0.00363355981850739
YJL050W	MTR4	YJL050W	-0.208138315233324	0.00364288112272673
YKL141W	SDH3	YKL141W	-0.598403776186782	0.00470142168349997
YDR326C	YSP2	YDR326C	-0.658500289489488	0.00370706821133118
YBR218C	PYC2	YBR218C	0.267961476000174	0.00379678763739443
YCL044C	MGR1	YCL044C	0.29599178935846	0.00380033687523158
YBR129C	OPY1	YBR129C	-0.444719575675897	0.00382522509420219
YCR086W	CSM1	YCR086W	-0.475042272616179	0.00387012389094562
YDL230W	PTP1	YDL230W	0.370798822761291	0.0038885197204674
YOL127W	RPL25	YOL127W	-0.230828181489834	0.003961790225554
YML058W	SML1	YML058W	-0.484097666948195	0.00398324406862072
YJL055W		YJL055W	-0.344597593215706	0.00401905682299337
YFR016C		YFR016C	0.200240536738441	0.00404471103931377
YHR113W	APE4	YHR113W	0.32702768706999	0.00406844980881626
YBR085C-A		YBR085C-A	0.389125549883818	0.00409095077603454
YDR047W	HEM12	YDR047W	0.363598069044585	0.00410339603352337
YPL252C	YAH1	YPL252C	-0.589155109594092	0.00412393717990123
YDR492W	IZH1	YDR492W	-0.422224211602408	0.007074351582278
YHR060W	VMA22	YHR060W	0.729102600842239	0.00419918364263863
YHR167W	THP2	YHR167W	-0.354203963704208	0.00531736209448088
YJR005W	APL1	YJR005W	0.344732743352584	0.00421543044367628
YJR043C	POL32	YJR043C	0.509493825450249	0.00428941863175048
YJR051W	OSM1	YJR051W	0.235927485103158	0.00431968934219918
YGR218W	CRM1	YGR218W	0.18808927687741	0.00432355172650534
YCL035C	GRX1	YCL035C	0.285383611853572	0.00436484666739962
YMR140W	SIP5	YMR140W	0.396446534871828	0.00448637254366418
YKR046C	PET10	YKR046C	0.637041481834462	0.00451069874770275
YNL048W	ALG11	YNL048W	0.29648239320527	0.00452701075491529
YER123W	YCK3	YER123W	0.400375497503962	0.00455852502914752
YNL240C	NAR1	YNL240C	-0.479312433700652	0.00457634380751906
YGR204W	ADE3	YGR204W	0.213207185309606	0.00463790559850852
YER021W	RPN3	YER021W	-0.176387877469292	0.00470772400539678
YGL172W	NUP49	YGL172W	-0.228968443839779	0.00472010032176893
YIL097W	FYV10	YIL097W	0.538391962743759	0.00526467812868944
YJL208C	NUC1	YJL208C	-0.26391433941496	0.00478204213171182
YHR137W	ARO9	YHR137W	-0.290636504480482	0.00481272005928691
YER145C	FTR1	YER145C	-0.428312685773946	0.00485583682354528
YML074C	FPR3	YML074C	-0.227319978473442	0.00487524130783743
YNL292W	PUS4	YNL292W	-0.225170247823968	0.00491077678929561
YPR156C	TPO3	YPR156C	0.37032910824643	0.00497929049529835
YPL190C	NAB3	YPL190C	-0.236938059643492	0.0049842938615236
YJL145W	SFH5	YJL145W	-0.225701192163161	0.0050271083007006
YGL223C	COG1	YGL223C	-0.380864510212302	0.00507454004451653
YLR063W	BMT6	YLR063W	-0.360752046562858	0.00509758752564317
YPR118W	MRI1	YPR118W	-0.19821073348875	0.0051126921987077
YEL061C	CIN8	YEL061C	-0.677059672760148	0.0459780298058113
YNR021W		YNR021W	-0.288046395738299	0.00554791044449661
YGR162W	TIF4631	YGR162W	-0.2607462166755	0.00564248553434038
YNL045W	LAP2	YNL045W	0.220701132152293	0.00564803104079488
YIL107C	PFK26	YIL107C	0.651765252183786	0.00698284362304534
YPR047W	MSF1	YPR047W	-0.78271506838642	0.00795555013101247
YOL041C	NOP12	YOL041C	-0.248840057186822	0.00569208000556044
YIL155C	GUT2	YIL155C	0.476024922713147	0.00580086496019806
YPL154C	PEP4	YPL154C	0.279543612185041	0.00583469904176491
YHR188C	GPI16	YHR188C	0.211373801128428	0.00583671612954793
YDR468C	TLG1	YDR468C	-0.372669028371085	0.00584428447644999
YER034W		YER034W	-0.3309412607525	0.00585801112885747
YAL032C	PRP45	YAL032C	0.41601335081668	0.00647705705149575
YLR356W	ATG33	YLR356W	0.549161383885899	0.00593570911146268
YOL064C	MET22	YOL064C	-0.363330238905643	0.00602549964839735
YER062C	GPP2	YER062C	0.493007805413427	0.00621779406938443
YML131W		YML131W	-0.474909997794203	0.00627286280256076
YDR068W	DOS2	YDR068W	0.211131809326716	0.00629869183684289
YKR042W	UTH1	YKR042W	-0.273010397349736	0.00631221720964999
YNL015W	PBI2	YNL015W	0.291775459213273	0.006461135483632
YJL121C	RPE1	YJL121C	0.287808542780283	0.00647579808770859
YDR039C	ENA2	YDR039C	-0.239821099708355	0.00653766706869486
YDR324C	UTP4	YDR324C	-0.263798800960252	0.00654048292207582
YGR205W	TDA10	YGR205W	0.431967068130017	0.00657133586528149
YDR251W	PAM1	YDR251W	0.250285780576899	0.00662477160453055
YDL076C	RXT3	YDL076C	0.619958505308116	0.00663675632583906
YOR275C	RIM20	YOR275C	0.431268466456697	0.00733312143914789
YER127W	LCP5	YER127W	-0.190587548282402	0.00669765046122132
YMR302C	YME2	YMR302C	0.282341207551557	0.0066999759492904
YDR182W	CDC1	YDR182W	0.359836660301788	0.00673007439404963
YNL224C	SQS1	YNL224C	-0.430180816239449	0.0239288330342689
YEL017W	GTT3	YEL017W	-0.375014073282397	0.00696277207370096
YJL042W	MHP1	YJL042W	0.215589393452003	0.00701545025775435
YBR101C	FES1	YBR101C	-0.202380355259702	0.00712778033998515
YDL153C	SAS10	YDL153C	-0.265037332793202	0.00715061188069096
YPR144C	NOC4	YPR144C	0.283165232350623	0.0071511509920198
YHL002W	HSE1	YHL002W	-0.252673067328512	0.00721280234200076
YDR497C	ITR1	YDR497C	-0.422664872251833	0.00791993273975469
YPL079W	RPL21B	YPL079W	-0.230687822466471	0.00723846061991468
YCL001W	RER1	YCL001W	0.362125201598644	0.00736521868604379
YJR002W	MPP10	YJR002W	-0.205893130686771	0.00737913415041079
YOR322C	LDB19	YOR322C	-0.351879786102849	0.00741254564768849
YML105C	SEC65	YML105C	-0.192206966790518	0.00741743541005411
YDR226W	ADK1	YDR226W	-0.173731866532115	0.007420164295141
YKL078W	DHR2	YKL078W	-0.503757552398039	0.0133856406034664
YMR275C	BUL1	YMR275C	0.275571723883292	0.00749771016610499
YJL130C	URA2	YJL130C	0.188296358749625	0.00754891146302297
YHR199C	AIM46	YHR199C	0.270935040255775	0.00765402054140124
YBL090W	MRP21	YBL090W	0.293796614810972	0.00765680506921377
YCR067C	SED4	YCR067C	0.241551285895167	0.0076737397692696
YNL186W	UBP10	YNL186W	-0.281289764849181	0.00775749705765882
YNL227C	JJJ1	YNL227C	0.784564797844517	0.00947211956749168
YLR060W	FRS1	YLR060W	-0.184409988112805	0.00792939723898226
YDL089W	NUR1	YDL089W	0.341470539103	0.00878345459605199
YBL032W	HEK2	YBL032W	-0.286079808367173	0.00805643075309118
YLR071C	RGR1	YLR071C	-0.360363169366433	0.00806034496819685
YLR405W	DUS4	YLR405W	-0.710680285702143	0.0169310685299972
YBL023C	MCM2	YBL023C	-0.203596498614601	0.00814375465663235
YOR157C	PUP1	YOR157C	-0.250298911427976	0.00817326836176554
YKL079W	SMY1	YKL079W	0.228183855033908	0.00827022952345256
YLR019W	PSR2	YLR019W	-0.453379329761187	0.00832360416951825
YOR356W	CIR2	YOR356W	-0.339157288735827	0.00839250755407799
YDL208W	NHP2	YDL208W	-0.347814988385473	0.00839827603340604
YPR022C	SDD4	YPR022C	0.327893525731231	0.00844292615250498
YNL175C	NOP13	YNL175C	-0.238892734615924	0.00858267757570297
YML093W	UTP14	YML093W	-0.258883463748347	0.00859293545110923
YOL018C	TLG2	YOL018C	-0.248677136943716	0.00860204027522681
YPL112C	PEX25	YPL112C	0.239730591458496	0.00860324498353388
YNL207W	RIO2	YNL207W	-0.252231056349206	0.00861172324210149
YJL041W	NSP1	YJL041W	-0.204804825967159	0.00865870996140205
YBR053C		YBR053C	0.27756955687487	0.00871361054770165
YIL140W	AXL2	YIL140W	0.355216381643885	0.0087164037722276
YDR155C	CPR1	YDR155C	0.228145321933503	0.00875243899437493
YMR130W		YMR130W	-0.384495465021775	0.00878274326224833
YDL019C	OSH2	YDL019C	0.168021932172184	0.00883134997066387
YPL043W	NOP4	YPL043W	-0.236463569279266	0.0089056277620762
YDL190C	UFD2	YDL190C	0.224826167583664	0.00891229169215264
YJL171C		YJL171C	0.398360633754077	0.0089246091113082
YIR026C	YVH1	YIR026C	-0.217167473967379	0.00906623225863451
YBL056W	PTC3	YBL056W	0.312176327898737	0.00912172220041527
YDL004W	ATP16	YDL004W	-0.261732091410412	0.00912652161945503
YDR452W	PPN1	YDR452W	0.241546684006586	0.00914517614451686
YIL125W	KGD1	YIL125W	0.235101316068306	0.00915933052148884
YML120C	NDI1	YML120C	0.405835731121876	0.00919375328495042
YNL088W	TOP2	YNL088W	0.179430372927115	0.00923107964832357
YLL023C	POM33	YLL023C	0.352991146577288	0.00931771613373036
YIL111W	COX5B	YIL111W	0.436197643817842	0.0093216657500975
YDR398W	UTP5	YDR398W	-0.20741451948496	0.0094622067774729
YBR044C	TCM62	YBR044C	0.881783954117349	0.0112558736090691
YDL235C	YPD1	YDL235C	-0.281201229157332	0.00947982335920949
YDL144C		YDL144C	0.897140857161173	0.0096037204753355
YIL048W	NEO1	YIL048W	-0.245889554404155	0.00966108576631738
YIL041W	GVP36	YIL041W	-0.165725644925249	0.00976964717828328
YLR262C-A	TMA7	YLR262C-A	-0.238481986174087	0.00982193532016723
YBR267W	REI1	YBR267W	-0.260447247408663	0.00988574628818783
YNL233W	BNI4	YNL233W	0.311313379022813	0.00993047183745929
YNL005C	MRP7	YNL005C	-0.196779831779175	0.00993642866546992
YNL243W	SLA2	YNL243W	0.171809936942545	0.0100023677951465
YPL135W	ISU1	YPL135W	-0.311290561718955	0.0100996654483935
YGL122C	NAB2	YGL122C	-0.241986089450911	0.0101047317449585
YCL047C	POF1	YCL047C	0.263465109363665	0.010116979826644
YLR361C	DCR2	YLR361C	0.446777050133051	0.010139889692299
YFL005W	SEC4	YFL005W	0.232054355674844	0.0101928383333343
YOR187W	TUF1	YOR187W	0.179572502276521	0.0102206089456531
YPL239W	YAR1	YPL239W	-0.247764540294593	0.0102550388882499
YDR036C	EHD3	YDR036C	0.297487063135058	0.0102586157818412
YPR004C	AIM45	YPR004C	0.206750175279367	0.0102633481933211
YBL039C	URA7	YBL039C	-0.173480874906026	0.010269024353685
YLR432W	IMD3	YLR432W	-0.183767239383659	0.0102921631417111
YPR028W	YOP1	YPR028W	0.339796106390473	0.0103044431754955
YJR080C	AIM24	YJR080C	0.231905409452114	0.0103098458364533
YMR313C	TGL3	YMR313C	0.301073811711984	0.0103280525179243
YMR189W	GCV2	YMR189W	0.345087752763618	0.0103945262067318
NA	NA	NA	-0.192252938997598	0.0103957447393744
YNR007C	ATG3	YNR007C	0.316078479028555	0.0103965058179992
YGR013W	SNU71	YGR013W	-0.366706427693881	0.0104476610713568
YER023W	PRO3	YER023W	0.220641056546892	0.0104711684292372
YKL023W		YKL023W	0.400906807801352	0.0105271728233595
YDR169C	STB3	YDR169C	0.177206145307899	0.0105658451298738
YDL140C	RPO21	YDL140C	-0.14802538824976	0.0106028503314622
YGR103W	NOP7	YGR103W	-0.241683854590498	0.0106711025448577
YBR003W	COQ1	YBR003W	0.180146710497866	0.0107170703821569
YER042W	MXR1	YER042W	0.233111064300363	0.0107267214021732
YIL020C	HIS6	YIL020C	0.190302546403696	0.010763861547762
YOR140W	SFL1	YOR140W	-0.382092416942495	0.0107939742056194
YMR235C	RNA1	YMR235C	-0.192707603778928	0.0108314048493056
YPL053C	KTR6	YPL053C	-0.247348155097956	0.0109971734273878
YJR123W	RPS5	YJR123W	-0.192411705857332	0.0110288708537608
NA	NA	NA	-0.251066583882448	0.0112016558924881
YMR003W	AIM34	YMR003W	0.346559652413191	0.0112142949746554
YAL012W	CYS3	YAL012W	-0.151453386242601	0.0112591288135373
YDL205C	HEM3	YDL205C	0.270704210002656	0.0112995511444326
YKR080W	MTD1	YKR080W	0.2963565334775	0.0113679759461754
YLR438C-A	LSM3	YLR438C-A	-0.619940992379693	0.0113820030717349
YGR090W	UTP22	YGR090W	-0.193566603906159	0.0113917367526806
YDR214W	AHA1	YDR214W	0.159819805291146	0.0114071760275224
YKL025C	PAN3	YKL025C	0.326519549500865	0.0115215081753248
YKL099C	UTP11	YKL099C	-0.294472022392831	0.0115480212090113
YDL010W	GRX6	YDL010W	-0.269864583788394	0.0115804940881565
YNR019W	ARE2	YNR019W	-0.72677308711889	0.01159773808363
NA	NA	NA	-0.422121527219666	0.0116119005987332
YBR038W	CHS2	YBR038W	-0.294906943059384	0.01682761887031
YCR057C	PWP2	YCR057C	-0.269521470288193	0.0117724017386817
YHR161C	YAP1801	YHR161C	0.375166687833485	0.0126750498573543
YGL150C	INO80	YGL150C	-0.223884530851368	0.0117842465810327
YOR362C	PRE10	YOR362C	0.166633422906589	0.0119491442144155
YDR167W	TAF10	YDR167W	-0.263198287520623	0.0119519318377231
YOR324C	FRT1	YOR324C	-0.828997211309929	0.033433921164728
YFL029C	CAK1	YFL029C	-0.54949970925604	0.011976738884694
YOR224C	RPB8	YOR224C	0.235157520059175	0.0120224141998768
YLR335W	NUP2	YLR335W	-0.157716558070749	0.0120574402062957
YLR401C	DUS3	YLR401C	-0.218907299251999	0.0120602551687114
YLR304C	ACO1	YLR304C	0.25370587520942	0.0120746976856104
YIL091C	UTP25	YIL091C	-0.180103775989082	0.0123359481947309
YGL038C	OCH1	YGL038C	-0.329952884447806	0.012574828594262
YHL039W	EFM1	YHL039W	-0.238409500046913	0.0125950366376265
YER178W	PDA1	YER178W	0.164851590378731	0.0127201736052119
YCL028W	RNQ1	YCL028W	-0.337124199039096	0.0127860324119972
YLR250W	SSP120	YLR250W	0.359466831905177	0.0128491631395007
YGL133W	ITC1	YGL133W	0.328067209397396	0.0128638096179789
YLR118C		YLR118C	0.348986667643967	0.0128895269117419
YHR082C	KSP1	YHR082C	-0.328549370591372	0.0129959748870184
YBR193C	MED8	YBR193C	0.286253802397802	0.0131450105290966
YMR083W	ADH3	YMR083W	0.246947419381186	0.0133615998621874
YGL169W	SUA5	YGL169W	-0.426153829976901	0.0133832392149507
YGL050W	TYW3	YGL050W	0.190340976490088	0.0134072988737971
YKR057W	RPS21A	YKR057W	0.304518291680402	0.0134761164250821
YGL106W	MLC1	YGL106W	-0.171054135313206	0.0135077532749707
YBR031W	RPL4A	YBR031W	-0.177280228391453	0.0135337597429563
YGR043C	NQM1	YGR043C	1.3604551126266	0.0137020949956831
YJR048W	CYC1	YJR048W	-0.649745969222757	0.0159363910553755
YDR388W	RVS167	YDR388W	0.189084322883676	0.0140216289686043
YGL095C	VPS45	YGL095C	0.196294984082463	0.0141704839542647
YPL084W	BRO1	YPL084W	0.187569987984077	0.0142889474172457
YMR108W	ILV2	YMR108W	0.159132754491011	0.0143696128922254
YFL007W	BLM10	YFL007W	0.218280505563214	0.014669380591854
YKL120W	OAC1	YKL120W	0.254525617901447	0.0146829652120734
YLR448W	RPL6B	YLR448W	0.168166922915248	0.014754073622861
YLR172C	DPH5	YLR172C	-0.247253745848653	0.0148332703357245
YDL182W	LYS20	YDL182W	0.198804605734935	0.0149974533544006
YGR250C		YGR250C	0.280240707565859	0.0150008259076096
YDR406W	PDR15	YDR406W	-0.687592960329795	0.0232801575307948
YCL026C-B	HBN1	YCL026C-B	-0.704208630923429	0.0152579229672774
YKL047W	ANR2	YKL047W	-0.260917475894612	0.0153335475121106
YKR026C	GCN3	YKR026C	-0.232134167855857	0.0153949550362623
YHR163W	SOL3	YHR163W	0.21210450006247	0.015395016078873
YIL131C	FKH1	YIL131C	-0.251777290174257	0.0155295025094292
YLR002C	NOC3	YLR002C	-0.191163601624456	0.0155766655698278
YCL030C	HIS4	YCL030C	0.299091836853169	0.0157539266199507
YMR219W	ESC1	YMR219W	0.201077571568831	0.0157788119284927
YOR006C	TSR3	YOR006C	0.276046712411468	0.0159195258022598
YBR017C	KAP104	YBR017C	0.22371076108017	0.0159617590999401
YNL216W	RAP1	YNL216W	-0.222125822960027	0.0159708922558336
YOR174W	MED4	YOR174W	-0.368500244043208	0.0160279319675095
YJL198W	PHO90	YJL198W	-0.239743547094868	0.0161783129070796
YNL259C	ATX1	YNL259C	0.567754045920175	0.0162573493790564
YAR015W	ADE1	YAR015W	0.19676186756185	0.0163488263598116
YJL060W	BNA3	YJL060W	0.190618649833951	0.0163819087446162
YNL050C		YNL050C	-0.409481150154267	0.0175848847474309
YOR160W	MTR10	YOR160W	-0.40955608438238	0.0165196133147434
YJR072C	NPA3	YJR072C	-0.209061431477501	0.0165672961626655
YGR004W	PEX31	YGR004W	-0.236466643610051	0.0166505796787614
YJL076W	NET1	YJL076W	-0.185716584984338	0.0166554993296912
YGR187C	HGH1	YGR187C	-0.295403168276746	0.0166805999924663
YMR301C	ATM1	YMR301C	0.232459139350222	0.0167183277888971
YOL022C	TSR4	YOL022C	-0.243802368932549	0.0167854949867771
YHL025W	SNF6	YHL025W	-0.470759458485073	0.0192496247004098
YLL040C	VPS13	YLL040C	0.143470091683589	0.0169611904056624
YER126C	NSA2	YER126C	-0.199765136835417	0.0169632867637601
YKL017C	HCS1	YKL017C	-0.349642359522711	0.0169654906936137
YER094C	PUP3	YER094C	0.242580203705295	0.0170541048771634
YOL078W	AVO1	YOL078W	0.455908349053317	0.0182447870176928
YDL192W	ARF1	YDL192W	0.244776983782952	0.0171796405952042
YLR074C	BUD20	YLR074C	-0.251783370461307	0.0172385138088682
YBR072W	HSP26	YBR072W	0.832184059601556	0.0173042731752744
YPL139C	UME1	YPL139C	-0.156431053081832	0.0173074763615782
YPR145W	ASN1	YPR145W	0.190939033191157	0.017491314943196
YJL207C	LAA1	YJL207C	0.347125814978746	0.0177573249485822
YBL041W	PRE7	YBL041W	0.302546205230968	0.0177606694494015
YDL067C	COX9	YDL067C	-0.464425210580615	0.0188808792956309
YHR207C	SET5	YHR207C	-0.290268764834963	0.0177945373705286
YCR084C	TUP1	YCR084C	-0.1584367133045	0.0178335676341191
YHR012W	VPS29	YHR012W	0.368007825434113	0.0179023682600136
YOR232W	MGE1	YOR232W	-0.215154475997352	0.0179084418597479
YJL001W	PRE3	YJL001W	0.234858937206901	0.0179208514101169
YLR197W	NOP56	YLR197W	-0.161728783962914	0.0179361256638311
YNL023C	FAP1	YNL023C	-0.335479741413529	0.0180007584184216
YBR192W	RIM2	YBR192W	-0.293953298543602	0.0180125149066095
YDL135C	RDI1	YDL135C	0.331961153821101	0.0180266467735887
YOR171C	LCB4	YOR171C	-0.177381967753515	0.0180378895419988
YML034W	SRC1	YML034W	0.19935040804614	0.018099323733966
YOR057W	SGT1	YOR057W	0.145379585449902	0.0181118548756598
YKR066C	CCP1	YKR066C	0.264755279544641	0.0181541807814051
YKL088W	CAB3	YKL088W	0.288377416297561	0.0181656137350381
YOR341W	RPA190	YOR341W	-0.14863355413755	0.0183384570409329
YLR310C	CDC25	YLR310C	-0.22235666048612	0.0183439470412473
YGR270W	YTA7	YGR270W	0.151845446845144	0.0186868275125508
YHR085W	IPI1	YHR085W	-0.403233670745504	0.0188420835389096
YBR120C	CBP6	YBR120C	0.199470672298766	0.0188448342436268
YBR034C	HMT1	YBR034C	-0.185992053908663	0.0188532304852984
YKL173W	SNU114	YKL173W	-0.229122141652486	0.0188938687916027
YOR347C	PYK2	YOR347C	0.26622863799134	0.0190008814235013
YDR412W	RRP17	YDR412W	-0.315943578158819	0.0190448261890661
YLR038C	COX12	YLR038C	-0.37181227360777	0.0190941086917176
YOR371C	GPB1	YOR371C	-0.349290234825538	0.0191638163205745
YMR072W	ABF2	YMR072W	0.211400809853032	0.0191921236365356
YDR213W	UPC2	YDR213W	0.312363709613514	0.0564407744749296
YDR161W	ACL4	YDR161W	-0.514695772593274	0.0192269077960748
YOL023W	IFM1	YOL023W	-0.823129656450078	0.0193796914308111
YGL083W	SCY1	YGL083W	0.292046430536431	0.0193824176679925
YBR122C	MRPL36	YBR122C	0.394789932124066	0.0193838867291989
YEL051W	VMA8	YEL051W	-0.167335426770084	0.0195259280720924
YDL237W	AIM6	YDL237W	0.201985041963631	0.0195286129799864
YML092C	PRE8	YML092C	-0.145808949215255	0.0195527826144856
YKL087C	CYT2	YKL087C	0.445994662562629	0.0196008483478334
YPL240C	HSP82	YPL240C	0.271355156152783	0.0196011832503065
YLR389C	STE23	YLR389C	0.1545465555714	0.0197249857674009
YLL009C	COX17	YLL009C	0.251954645928738	0.0197447513251418
YJL174W	KRE9	YJL174W	-0.319039495223574	0.021017444292185
YKL207W	EMC3	YKL207W	0.369280293024573	0.0200011672517178
YOR195W	SLK19	YOR195W	-0.167668965181068	0.0201085338519549
YER049W	TPA1	YER049W	-0.206339243299304	0.0201936104664869
YKL094W	YJU3	YKL094W	0.179769545587803	0.0202396918124094
YKL172W	EBP2	YKL172W	-0.292146810336227	0.0202843650094753
YPR173C	VPS4	YPR173C	-0.232721443773947	0.0204540389317743
YGL141W	HUL5	YGL141W	-0.506558690187482	0.020608829036381
YMR273C	ZDS1	YMR273C	-0.281569535375329	0.0206839081020056
R0020C	REP1	R0020C	0.380911478761163	0.0207289512450891
YKL091C		YKL091C	0.354823157547489	0.0207461205269573
YHR052W	CIC1	YHR052W	-0.196953684836984	0.0208004945877344
YOR126C	IAH1	YOR126C	-0.257067761750438	0.0208642438026988
YMR264W	CUE1	YMR264W	0.294292883874977	0.0209366246645116
YCL032W	STE50	YCL032W	-0.330222972406609	0.0211445081200276
YJL126W	NIT2	YJL126W	-0.644122908801457	0.0256693874496117
YNL166C	BNI5	YNL166C	-0.147202181501946	0.0212141729620255
YIR037W	HYR1	YIR037W	0.214965801005381	0.0213675164592334
YMR115W	MGR3	YMR115W	-0.262931386003014	0.0214704848501491
YDL018C	ERP3	YDL018C	0.382684975080377	0.0218525188081413
YKL144C	RPC25	YKL144C	-0.246038621321699	0.0231541592972505
YCL054W	SPB1	YCL054W	-0.194504820252892	0.0219277998068133
YKR071C	DRE2	YKR071C	-0.195388899818688	0.0219839734165566
YFR006W		YFR006W	-0.15912467673709	0.0220145376391628
YGL112C	TAF6	YGL112C	-0.174949876302549	0.0220765049437339
YLR090W	XDJ1	YLR090W	0.233770573484996	0.0221270396707178
YEL022W	GEA2	YEL022W	0.189673646728995	0.0222985617125602
YNL113W	RPC19	YNL113W	-0.167134788022686	0.0223031054331442
YLR108C		YLR108C	-0.418328912733454	0.049468065266544
YER142C	MAG1	YER142C	0.335171822869544	0.0226202412553215
YBR135W	CKS1	YBR135W	-0.198040501292791	0.0226508604966109
YML015C	TAF11	YML015C	-0.256184089112683	0.0226894569303065
YDR107C	TMN2	YDR107C	0.356095732778243	0.0227840316055672
YLR420W	URA4	YLR420W	0.22664291215089	0.0228238882927373
YNL256W	FOL1	YNL256W	-0.278194649740982	0.0228909342150232
YIL004C	BET1	YIL004C	0.320078052621401	0.0229385976164158
YDR093W	DNF2	YDR093W	0.25271429719961	0.0230697244762238
YDL056W	MBP1	YDL056W	-0.48166988092364	0.023347897773896
YNL317W	PFS2	YNL317W	0.282347061982883	0.0234317951923716
YKL114C	APN1	YKL114C	0.244420378427769	0.0234761789849789
YLL022C	HIF1	YLL022C	-0.222531345644153	0.0235561410000639
YJR066W	TOR1	YJR066W	0.172543490418725	0.0236564144865551
YLR113W	HOG1	YLR113W	0.18657073171477	0.0236909716746401
YBR249C	ARO4	YBR249C	-0.169815936435477	0.0237499232806135
YCR016W		YCR016W	-0.4304073542373	0.0237710508983844
YNL197C	WHI3	YNL197C	-0.243282589185384	0.0238125690116132
YOR116C	RPO31	YOR116C	-0.146858103112741	0.0238311488089289
YOR094W	ARF3	YOR094W	0.283330708846673	0.0239707892377931
YHR181W	SVP26	YHR181W	-0.23751856729999	0.0240218927020925
YPL207W	TYW1	YPL207W	-0.230626308711429	0.0240654460863954
YJL137C	GLG2	YJL137C	0.52411941009818	0.0269775948160807
YPR100W	MRPL51	YPR100W	-0.493529986551252	0.0242148393332753
YLR017W	MEU1	YLR017W	-0.218176708116577	0.0243277734353579
YDR454C	GUK1	YDR454C	-0.196840202133973	0.0245715870931363
YDR518W	EUG1	YDR518W	0.275437850145664	0.0246272147206098
YOR128C	ADE2	YOR128C	0.217321900072282	0.0246406080417622
YJR059W	PTK2	YJR059W	0.20480543903485	0.0246590262406874
YAL044W-A		YAL044W-A	-0.320523932301796	0.0246646682217616
YOR165W	SEY1	YOR165W	0.172640590152437	0.0246680992112167
YGR037C	ACB1	YGR037C	0.188062155607014	0.0247062706335186
YJR099W	YUH1	YJR099W	0.275905663212086	0.0247529659995101
YJL008C	CCT8	YJL008C	-0.147310356671195	0.0248075222081076
YDL042C	SIR2	YDL042C	0.291820082841451	0.024938399036721
YJL148W	RPA34	YJL148W	-0.397000290814645	0.0249803636317033
YLR072W	LAM6	YLR072W	0.2654390638208	0.0253296939783089
YDR035W	ARO3	YDR035W	0.185763017704428	0.0254193741188971
YLR138W	NHA1	YLR138W	0.23667609057069	0.0283275449721605
YKR100C	SKG1	YKR100C	-0.253193473649009	0.0254561901181179
YJR029W		YJR029W	0.415323538542278	0.0454100736226047
YBR096W		YBR096W	-0.213821652078718	0.0255714557854449
YDR147W	EKI1	YDR147W	0.414125426458263	0.0255981107395884
YGR119C	NUP57	YGR119C	-0.174576227548382	0.0256900721185237
YOL130W	ALR1	YOL130W	-0.25007934351218	0.025940329894498
YHR138C		YHR138C	0.344701343022638	0.0259853211491206
YBR095C	RXT2	YBR095C	-0.325220278397811	0.0274019203476634
YOR095C	RKI1	YOR095C	-0.245405473954499	0.0260929123503924
YPR137W	RRP9	YPR137W	-0.170261958550196	0.0261982046874798
YDL130W-A	STF1	YDL130W-A	0.468663463988499	0.026220549970309
YFR047C	BNA6	YFR047C	0.163570886681789	0.0262357509529477
YDR395W	SXM1	YDR395W	-0.169505411426663	0.0262561495123257
YPR147C		YPR147C	0.38114178762325	0.033634602605352
YGL043W	DST1	YGL043W	-0.186872746655549	0.0263339597899796
YGL191W	COX13	YGL191W	-0.383291358745367	0.0263446379533817
YLR291C	GCD7	YLR291C	-0.182841174624418	0.0263956430198877
YLR003C	CMS1	YLR003C	-0.215826438823981	0.0264612497671408
YFR003C	YPI1	YFR003C	0.230238035776598	0.0265582766967697
YER018C	SPC25	YER018C	-0.306861238116753	0.0265617074139119
YDL073W		YDL073W	-0.417274047670915	0.0295569036602405
YLL018C	DPS1	YLL018C	0.147137257780145	0.0266651897870946
YAL013W	DEP1	YAL013W	0.313776757795885	0.0266765099783154
YKR002W	PAP1	YKR002W	0.162727409473639	0.0267479421253229
YPL212C	PUS1	YPL212C	-0.162281451040933	0.0268937521507609
YAL001C	TFC3	YAL001C	0.343458477936654	0.0269181408459447
YLR390W-A	CCW14	YLR390W-A	-0.386537984612993	0.0269798229405865
YNL010W		YNL010W	0.125598984009514	0.0271953656409032
YMR236W	TAF9	YMR236W	-0.224899719871555	0.0271983969490616
YMR238W	DFG5	YMR238W	0.403196610650433	0.0286029994973821
YHR040W	BCD1	YHR040W	-0.352170808935377	0.0286996317864736
YJL178C	ATG27	YJL178C	0.182951756537182	0.0275012978134602
YOR276W	CAF20	YOR276W	-0.203463171466055	0.0275084891163028
YLR361C-A		YLR361C-A	-0.450426212394433	0.0275526669387184
YJL024C	APS3	YJL024C	-0.324516293877366	0.0326908732205376
YPR088C	SRP54	YPR088C	-0.16859059744521	0.0277088620242278
YML039W		YML039W	-0.48008657618324	0.0280488824007395
YCR036W	RBK1	YCR036W	0.291352874024373	0.0282761739200292
YOR075W	UFE1	YOR075W	-0.458458661206052	0.0297700631348954
YBL059C-A	CMC2	YBL059C-A	0.325982982724518	0.0284145539714908
YLL050C	COF1	YLL050C	0.229213990243728	0.0284864516050528
YGL202W	ARO8	YGL202W	0.211065750987508	0.028592813441686
YKL191W	DPH2	YKL191W	-0.220016029171095	0.0286621494462288
YLR190W	MMR1	YLR190W	0.28911217699358	0.0362744774461101
YDR320C-A	DAD4	YDR320C-A	-0.296924346270355	0.0395637482847475
YDR490C	PKH1	YDR490C	0.265218732939292	0.0287802989910063
YLR345W		YLR345W	0.35832281797018	0.032100858119718
YKR067W	GPT2	YKR067W	0.287838829410667	0.0291215084675654
YDL066W	IDP1	YDL066W	0.160808239331072	0.0291303648921281
YOL030W	GAS5	YOL030W	0.217898716364186	0.0291430273480745
YLR069C	MEF1	YLR069C	0.25372616044536	0.0291477197844138
YDR465C	RMT2	YDR465C	-0.259775644281188	0.029179710187431
YBR225W		YBR225W	-0.314950169337422	0.0293576183681703
YKL204W	EAP1	YKL204W	0.130988903650444	0.0293628952508415
YLR375W	STP3	YLR375W	-0.333074398841916	0.0294515010089182
YER134C		YER134C	0.208002391432821	0.0294542336878161
YDR430C	CYM1	YDR430C	0.165742353007737	0.0296194362745956
YDR245W	MNN10	YDR245W	0.338375715058095	0.0297119887750751
YLR077W	FMP25	YLR077W	0.365341104257325	0.0298504587755189
YDL150W	RPC53	YDL150W	-0.406832488532853	0.0298940001177576
YFL023W	BUD27	YFL023W	-0.159922266626108	0.0299153201127222
YLR276C	DBP9	YLR276C	-0.128961903311598	0.0300389781067029
YHR099W	TRA1	YHR099W	0.128578637245823	0.0301303924748224
YDR188W	CCT6	YDR188W	-0.174526419534455	0.0302362900811452
YML056C	IMD4	YML056C	-0.152812618101457	0.0303212290951218
YNR049C	MSO1	YNR049C	-0.19207555433718	0.0304270887359099
YDR443C	SSN2	YDR443C	0.472475591425386	0.0338381398074696
YBR216C	YBP1	YBR216C	0.241027539227012	0.0309445405141016
YNR016C	ACC1	YNR016C	0.266027991271944	0.0309694609344723
YPR103W	PRE2	YPR103W	0.210483246180559	0.0310172013899118
YDL198C	GGC1	YDL198C	-0.254580122395055	0.0310733903427041
YJL098W	SAP185	YJL098W	-0.260243749930183	0.0311990284600675
YDR045C	RPC11	YDR045C	-0.303250184834511	0.0313573791933687
YPR163C	TIF3	YPR163C	-0.134853279527022	0.0313769336736486
YGR267C	FOL2	YGR267C	-0.19595325477313	0.0315913266995915
YMR213W	CEF1	YMR213W	-0.194494651311803	0.0348259074759097
YOL143C	RIB4	YOL143C	0.324946849229164	0.0319228941789242
YNL062C	GCD10	YNL062C	-0.179523604888388	0.0321004687953601
YJR009C	TDH2	YJR009C	-0.408673314774219	0.0321563903029593
YJL066C	MPM1	YJL066C	0.328044459488364	0.0322678458424798
YOR299W	BUD7	YOR299W	-0.263456594694091	0.0402949215589578
YOR155C	ISN1	YOR155C	0.279253792977755	0.0326880087409529
YGR055W	MUP1	YGR055W	0.482161103437907	0.0483681582430016
YDR279W	RNH202	YDR279W	0.251707585557348	0.0327785565468567
YDL051W	LHP1	YDL051W	-0.178290892819753	0.0327831014965877
YDR060W	MAK21	YDR060W	-0.159795997453937	0.032877121748208
YDR448W	ADA2	YDR448W	-0.34295182110311	0.0329831954526629
YEL047C	FRD1	YEL047C	0.15827686273936	0.0329863474244611
YKL080W	VMA5	YKL080W	-0.153838631909281	0.0332320990431373
YJR010C-A	SPC1	YJR010C-A	0.371296981739498	0.0332636691274243
YMR120C	ADE17	YMR120C	0.308069498299091	0.0332679874449961
YGR174C	CBP4	YGR174C	-0.348367914360978	0.0348935452024376
YDL113C	ATG20	YDL113C	0.339027897057356	0.0334277577287161
YMR231W	PEP5	YMR231W	-0.233478730721615	0.0339615101263903
YHL038C	CBP2	YHL038C	-0.4461634216599	0.0340098020358581
YDR019C	GCV1	YDR019C	0.263130983125663	0.0341597429325212
YDL166C	FAP7	YDL166C	-0.218386661536169	0.0342132527339003
YDR163W	CWC15	YDR163W	-0.215319839773638	0.0343594802218506
YCL016C	DCC1	YCL016C	-0.304251280173016	0.0343631608608015
YGL200C	EMP24	YGL200C	0.173570338903215	0.0344382002758348
YDL053C	PBP4	YDL053C	-0.169061902057141	0.0344582363705565
YMR229C	RRP5	YMR229C	-0.134452565473886	0.0344721189403764
YDR538W	PAD1	YDR538W	-0.305163450241249	0.0651635392016688
YMR139W	RIM11	YMR139W	0.278561111676659	0.034791529548608
YPL222W	FMP40	YPL222W	-0.587514424886606	0.0381550634791319
YHR072W-A	NOP10	YHR072W-A	-0.359221920477349	0.0349056186280717
YMR220W	ERG8	YMR220W	-0.187933039801099	0.035044613795131
YPL270W	MDL2	YPL270W	-0.262576814705682	0.0354564968768395
YIL142W	CCT2	YIL142W	-0.133154124070209	0.0355190556106183
YDR399W	HPT1	YDR399W	0.160316068470138	0.0356767516874303
YDL015C	TSC13	YDL015C	-0.219113342949043	0.0357655181107423
YOR220W	RCN2	YOR220W	0.193301968844978	0.0357799490267535
YIL074C	SER33	YIL074C	0.128700261290255	0.0357874693671799
YPL058C	PDR12	YPL058C	-0.37205580710182	0.0440579946576866
YLR370C	ARC18	YLR370C	0.216235420221995	0.035843922895282
YDR309C	GIC2	YDR309C	-0.327760501701238	0.0670229967397105
YMR121C	RPL15B	YMR121C	0.300040098030994	0.0360555184864377
YOR145C	PNO1	YOR145C	-0.3230641496102	0.0361290132215059
YHL003C	LAG1	YHL003C	0.283861714143743	0.0361689937176848
YGR241C	YAP1802	YGR241C	0.355306328986948	0.0364574685873849
YJR083C	ACF4	YJR083C	0.217171499939603	0.0365341905413944
YOR143C	THI80	YOR143C	0.399739742765604	0.0365740461443911
YMR020W	FMS1	YMR020W	0.459048343494651	0.0382343506397326
YGR170W	PSD2	YGR170W	0.381300485575341	0.0424471752403308
YDL003W	MCD1	YDL003W	-0.255792361572578	0.0369254484626924
YHR042W	NCP1	YHR042W	0.155873449925139	0.037181508245208
YAL036C	RBG1	YAL036C	-0.176508932680097	0.0377813288215657
YKL006C-A	SFT1	YKL006C-A	0.268504866651003	0.0411841231460674
YJL123C	MTC1	YJL123C	-0.175834270305803	0.0379099767490672
YPL063W	TIM50	YPL063W	-0.199064040760188	0.0380779475840092
YER017C	AFG3	YER017C	0.251567174057808	0.0381000054902201
YDR517W	GRH1	YDR517W	0.256654872625944	0.0381869569554282
YOL069W	NUF2	YOL069W	-0.238647125342286	0.0381989548373276
YHR208W	BAT1	YHR208W	0.198756091596916	0.0383347544159208
YNR054C	ESF2	YNR054C	-0.156630756240485	0.0384355597584368
YNL112W	DBP2	YNL112W	-0.168394883826078	0.0384455354722996
YLR220W	CCC1	YLR220W	-0.211350869127724	0.0385591120071713
YKL010C	UFD4	YKL010C	0.293207443953722	0.0386443170720607
YER044C	ERG28	YER044C	0.335178707122022	0.0402443598860863
YML086C	ALO1	YML086C	-0.13293533168904	0.0387648793524626
YBR280C	SAF1	YBR280C	1.12756351597682	0.0422485428258778
YIL035C	CKA1	YIL035C	-0.218310391742275	0.0389991662850107
YPL091W	GLR1	YPL091W	0.138064604120611	0.0391683744932242
YGR058W	PEF1	YGR058W	-0.267835469506998	0.0393113772088203
YGL209W	MIG2	YGL209W	0.465985228073329	0.107447708246526
YPL211W	NIP7	YPL211W	-0.207213781147523	0.0393976463477463
YGR215W	RSM27	YGR215W	-0.312571930131234	0.0428420160362496
YNR037C	RSM19	YNR037C	-0.211212728204188	0.039485832876241
YDR364C	CDC40	YDR364C	-0.415667080898324	0.039490005633083
YLR225C		YLR225C	0.201681990062784	0.0395068821598244
YMR037C	MSN2	YMR037C	-0.256249622114904	0.0395109454398359
YLR253W	MCP2	YLR253W	0.395432285026907	0.0396139498412269
YOR098C	NUP1	YOR098C	-0.12698113333526	0.039633999318616
YOR294W	RRS1	YOR294W	-0.282815095028308	0.0396620706463683
YKL170W	MRPL38	YKL170W	0.268872622509132	0.0397461134519843
YNL157W	IGO1	YNL157W	-0.206332731840629	0.0398597674223566
YGL140C		YGL140C	-0.275765776253056	0.0398765734963321
YOR311C	DGK1	YOR311C	-0.216547678913805	0.0399093537192576
YKL140W	TGL1	YKL140W	-0.228315235471204	0.039993173993531
YBR002C	RER2	YBR002C	0.385668469679864	0.0400080837927012
YNL155W	CUZ1	YNL155W	-0.206935389831223	0.0400841926744659
YJL201W	ECM25	YJL201W	-0.467682764245858	0.0403083288020262
YER174C	GRX4	YER174C	0.158182615357582	0.0403629266803628
YPL181W	CTI6	YPL181W	-0.323693263816569	0.0405086784675321
YML035C	AMD1	YML035C	0.155807754107123	0.0405354333874977
YEL056W	HAT2	YEL056W	-0.169073217316377	0.0405489282678624
YDR138W	HPR1	YDR138W	0.208214409837428	0.0406370332834336
YHR024C	MAS2	YHR024C	0.187453694742366	0.0407632722840294
YDR321W	ASP1	YDR321W	-0.196148625943319	0.0409001880741411
YLR163C	MAS1	YLR163C	-0.146535099615161	0.0409007862890889
YLR059C	REX2	YLR059C	-0.209857449022792	0.0409303784984445
YGR185C	TYS1	YGR185C	-0.159626396950618	0.0413619923046631
YGL004C	RPN14	YGL004C	0.216761719607806	0.0413663931292976
YPR062W	FCY1	YPR062W	-0.247887390919818	0.0414818354362222
YPL228W	CET1	YPL228W	-0.149249151907984	0.0416346768851939
YHL015W	RPS20	YHL015W	-0.174691618358182	0.0420932842707565
YGR237C		YGR237C	0.251269969888032	0.0421673635477378
YNL192W	CHS1	YNL192W	0.180576091801388	0.042253174082999
YOR340C	RPA43	YOR340C	-0.18606068275994	0.042257993208312
YDR079C-A	TFB5	YDR079C-A	0.356082000240338	0.042446254050935
Q0250	COX2	Q0250	0.545033567545243	0.0425374378470927
YHR108W	GGA2	YHR108W	-0.123880444557454	0.0426488988425091
YIL030C	SSM4	YIL030C	-0.167309193434782	0.0429351192228751
YOL066C	RIB2	YOL066C	-0.244007891835128	0.0430378719011291
YDL240W	LRG1	YDL240W	-0.353858475726192	0.0430775948090188
YBR082C	UBC4	YBR082C	0.361026357679201	0.0431118354677561
YNL232W	CSL4	YNL232W	-0.169603635635944	0.0432843017501875
YJL005W	CYR1	YJL005W	0.226596922293755	0.0433500879683711
YLR351C	NIT3	YLR351C	0.170459939261587	0.0434275893026808
YKR048C	NAP1	YKR048C	-0.13276871432787	0.0434455662823438
NA	NA	NA	0.470865282854554	0.0435169195818398
YGL203C	KEX1	YGL203C	-0.135030556105967	0.0435870387551645
YDL164C	CDC9	YDL164C	-0.149601045564175	0.043665790428355
YFL042C	LAM5	YFL042C	0.19730919512919	0.0438359191687968
YJL141C	YAK1	YJL141C	0.309372771674429	0.044066076707616
YNL149C	PGA2	YNL149C	-0.338151834629951	0.0442106260790653
YMR307W	GAS1	YMR307W	-0.138738759331282	0.0443422498124761
YDR377W	ATP17	YDR377W	0.179579236643388	0.0443642039306977
YJR140C	HIR3	YJR140C	-0.221382119160975	0.0445302803644681
YCL059C	KRR1	YCL059C	-0.144547819937063	0.0446995315054282
YJL010C	NOP9	YJL010C	-0.176268510857589	0.0448126060792151
YLR126C		YLR126C	-0.180233263929718	0.0449426673516849
YIL002W-A		YIL002W-A	0.309111729897289	0.0449827301571162
YBR104W	YMC2	YBR104W	-0.250018109581418	0.0690463337803212
YGR034W	RPL26B	YGR034W	-0.121206027961776	0.0452905219058735
YGL190C	CDC55	YGL190C	-0.167192795803423	0.045308168590922
YBR092C	PHO3	YBR092C	0.220841871479028	0.0453367934191098
YBR142W	MAK5	YBR142W	-0.183678832232125	0.0457675238669974
YHR170W	NMD3	YHR170W	-0.186066713283299	0.0459280910363223
YGL082W		YGL082W	0.266000380609594	0.0460399037010647
YGL248W	PDE1	YGL248W	0.330433130462335	0.0460834322548055
YPL032C	SVL3	YPL032C	0.17592994988631	0.0463697082884927
YKL122C	SRP21	YKL122C	-0.163620070768253	0.0464429214423139
YGR002C	SWC4	YGR002C	-0.28550616647561	0.0465975285049945
YNL185C	MRPL19	YNL185C	-0.318275694853895	0.0466170003887938
YIL062C	ARC15	YIL062C	-0.195256817102639	0.0467088843449206
YHR112C		YHR112C	0.262857446566279	0.0469218462770281
YMR050C		YMR050C	0.20031328183638	0.0469402392425275
YNR030W	ALG12	YNR030W	0.263621518628185	0.0469460898471967
YHR110W	ERP5	YHR110W	0.333478215598898	0.0469787446582755
YHR081W	LRP1	YHR081W	-0.248055797282767	0.0471212545203145
YNL158W	PGA1	YNL158W	-0.244750232971242	0.0532602231704466
YGR211W	ZPR1	YGR211W	-0.149869275185143	0.0472974223405788
YOR332W	VMA4	YOR332W	0.150931397987755	0.047400683305181
YLR200W	YKE2	YLR200W	-0.227583865022396	0.047906595943938
YIL116W	HIS5	YIL116W	0.28794282166589	0.0480998702573468
YLR207W	HRD3	YLR207W	0.240620262863764	0.0481295611159729
YBR089C-A	NHP6B	YBR089C-A	0.156330836856693	0.0482624712239497
YAL026C	DRS2	YAL026C	0.221670706207313	0.0483276403737771
YBR058C	UBP14	YBR058C	0.139706285073512	0.0483627213611757
YGL185C		YGL185C	-0.17155181255043	0.0483708332004702
YBR187W	GDT1	YBR187W	-0.349403693343408	0.0726442192266256
YKL007W	CAP1	YKL007W	0.300223660881706	0.0485802369966693
YOL042W	NGL1	YOL042W	-0.356605486656782	0.0579283084789612
YDR166C	SEC5	YDR166C	0.147224069769425	0.0488617783145054
YCL010C	SGF29	YCL010C	-0.216896550646826	0.0489989831350016
YKL126W	YPK1	YKL126W	-0.18365558530509	0.0490468365309207
YDR183W	PLP1	YDR183W	-0.281873620466939	0.0496800505306177
YKL082C	RRP14	YKL082C	-0.247983095552609	0.0497432264385259
YPL246C	RBD2	YPL246C	0.213979608228758	0.0498170654934856
YKR082W	NUP133	YKR082W	0.132152296269062	0.049865588062885
YIR003W	AIM21	YIR003W	0.128695639164629	0.050075908846532
YIL021W	RPB3	YIL021W	-0.18953640691818	0.0503103351826272
YGL094C	PAN2	YGL094C	0.202069250042978	0.0503792440591404
YGR157W	CHO2	YGR157W	-0.1205677813915	0.0506229832074341
YOR353C	SOG2	YOR353C	-0.221253065722433	0.0506553244734835
YPL128C	TBF1	YPL128C	-0.265678012940299	0.0506885108429397
YCR051W		YCR051W	-0.148918759280686	0.0507566445918118
YJL080C	SCP160	YJL080C	-0.114988161958955	0.0509233785091348
YOR293W	RPS10A	YOR293W	0.186993214331103	0.0511044882002187
YML108W		YML108W	0.459142345321698	0.0573371177412596
YAL016W	TPD3	YAL016W	-0.15581294516225	0.0512683948794732
YBR233W	PBP2	YBR233W	0.237972548214127	0.0513549788260389
YLR460C		YLR460C	-0.353105093634774	0.0514370808039326
YHR068W	DYS1	YHR068W	-0.133326005499779	0.0516091771166906
YJL165C	HAL5	YJL165C	0.17579914880055	0.0516765029396642
YBL024W	NCL1	YBL024W	-0.114431528229215	0.0518824643613506
YDL225W	SHS1	YDL225W	0.168879389347886	0.051974294024706
YJR070C	LIA1	YJR070C	-0.126243455609565	0.0520142863270773
YKR090W	PXL1	YKR090W	-0.192326526465816	0.0520276819330037
YAL019W	FUN30	YAL019W	-0.190889066191627	0.0521628127732313
YMR006C	PLB2	YMR006C	0.29798570850344	0.0523206301442065
YJL149W	DAS1	YJL149W	-0.541389016837027	0.124325619918756
YPL245W		YPL245W	-0.390716327252239	0.0528369960861265
YHR076W	PTC7	YHR076W	0.172492231384368	0.0532461245820055
YPR029C	APL4	YPR029C	0.140878442461368	0.0532935331855416
YPR133W-A	TOM5	YPR133W-A	-0.171664714289772	0.0533037731422581
YCR011C	ADP1	YCR011C	0.160797494680253	0.0533207127142626
YNR053C	NOG2	YNR053C	-0.145243547493475	0.053381320800728
YDR121W	DPB4	YDR121W	-0.191097593617389	0.0534008918636119
YDR108W	TRS85	YDR108W	0.29957047454802	0.0535398504336003
YOR370C	MRS6	YOR370C	-0.166680190038932	0.0537865505466405
YMR099C		YMR099C	0.120558386421845	0.0538411276036546
YGR195W	SKI6	YGR195W	0.186556276517997	0.0541308816563265
NA	NA	NA	-0.204048153464001	0.0544565212291705
YMR239C	RNT1	YMR239C	-0.229431269237022	0.0544580592399192
YDR457W	TOM1	YDR457W	0.115614663316411	0.0545671654936594
YDR165W	TRM82	YDR165W	-0.160421111060856	0.0546518789221148
YIL070C	MAM33	YIL070C	0.123527614117098	0.0547265783529438
YKL085W	MDH1	YKL085W	0.196453744766856	0.0547564101553814
YMR312W	ELP6	YMR312W	-0.22349901272446	0.0550633076380461
YJL044C	GYP6	YJL044C	-0.27073091218087	0.0550875957750658
YJL073W	JEM1	YJL073W	0.28497879174941	0.0590603288533456
YDR397C	NCB2	YDR397C	0.245604047758764	0.0553403778911018
YGL044C	RNA15	YGL044C	0.213139106504322	0.0556774524876718
YOR168W	GLN4	YOR168W	-0.109726681711198	0.0559679150629136
YOL080C	REX4	YOL080C	-0.35876045598669	0.0559928547713815
YPR124W	CTR1	YPR124W	0.151343802901074	0.0560358796755861
YDR099W	BMH2	YDR099W	-0.265854206321777	0.0560940027559506
YLR435W	TSR2	YLR435W	-0.344340754574166	0.0561328378899629
YLR312W-A	MRPL15	YLR312W-A	-0.172807156342813	0.0563305392480159
YPR161C	SGV1	YPR161C	-0.169231012630863	0.0563342048345516
YER113C	TMN3	YER113C	0.243881237803489	0.060522722314481
YDR293C	SSD1	YDR293C	0.105239378001215	0.0566923329002519
YDR316W	OMS1	YDR316W	0.286038117802899	0.0567865626280223
YER040W	GLN3	YER040W	-0.304693754455499	0.0631486866523962
YJR110W	YMR1	YJR110W	-0.454642677502182	0.0664150547124271
YOR257W	CDC31	YOR257W	-0.1684334425027	0.0571357915366635
Q0045	COX1	Q0045	-0.435313959655815	0.059340442716938
YDR027C	VPS54	YDR027C	-0.186273542098494	0.0576490435812782
YJL034W	KAR2	YJL034W	-0.121820578009455	0.0577912157477124
YPR079W	MRL1	YPR079W	-0.274174342344512	0.0599059115658916
YER164W	CHD1	YER164W	0.133715209455943	0.0581997980919071
YPL183C	RTT10	YPL183C	-0.185487357068872	0.0583607660413705
YCR004C	YCP4	YCR004C	0.133103241350604	0.0584690210075317
YML011C	RAD33	YML011C	0.236255464817891	0.0680409059294821
YOR227W	HER1	YOR227W	0.358801095929685	0.0587215617037848
YGL091C	NBP35	YGL091C	-0.323225554926818	0.058775937077312
YNL261W	ORC5	YNL261W	-0.40688103466028	0.0588845665807694
YJR057W	CDC8	YJR057W	0.217501478886465	0.0607147980828889
YPL122C	TFB2	YPL122C	0.281280323347367	0.0590331567432264
YLR397C	AFG2	YLR397C	-0.208329534958331	0.0592295624004726
YMR134W	ERG29	YMR134W	-0.297924257633504	0.0592486958117961
YLL011W	SOF1	YLL011W	-0.205504584596085	0.0592764095077931
YOL052C	SPE2	YOL052C	0.1606458990668	0.0595142572449008
YPL187W	MF(ALPHA)1	YPL187W	0.329641441650427	0.0944788417559366
YPR128C	ANT1	YPR128C	-0.263875897319522	0.0595820392463505
YNL156C	NSG2	YNL156C	-0.296761449281089	0.0598121353331344
YKR089C	TGL4	YKR089C	-0.251831014327752	0.0598432567774503
YNL173C	MDG1	YNL173C	-0.204146180450255	0.0601613190830871
YOR112W	CEX1	YOR112W	0.13447440160455	0.0601952449773368
YLR034C	SMF3	YLR034C	0.233113109496919	0.0602304081781526
YHL007C	STE20	YHL007C	-0.141872031763814	0.0602452762608409
YEL031W	SPF1	YEL031W	-0.10423784558958	0.060256151045324
YML079W		YML079W	0.163951176877099	0.0605966303444194
YPL131W	RPL5	YPL131W	0.180732268136651	0.0610507663120233
YMR113W	FOL3	YMR113W	0.280067699223014	0.0612696184071901
YGL039W		YGL039W	0.293520530078109	0.0617579243488885
YKR024C	DBP7	YKR024C	-0.196128016076752	0.0621211504934959
YGR229C	SMI1	YGR229C	-0.227788627658747	0.0622234364016016
YBR289W	SNF5	YBR289W	-0.230025116174186	0.062319604366152
YLR373C	VID22	YLR373C	0.194025516302986	0.0623291963969386
YLL013C	PUF3	YLL013C	0.11147373513198	0.0623817964684133
YNL329C	PEX6	YNL329C	-0.536579277491786	0.0720508976689588
YNL087W	TCB2	YNL087W	-0.222956539624267	0.0625334202243761
YHR027C	RPN1	YHR027C	0.123768351017382	0.0625857629798395
YAR002W	NUP60	YAR002W	-0.145895072321714	0.0625871957618994
YLR231C	BNA5	YLR231C	0.173333905316483	0.0626755776293933
YDR330W	UBX5	YDR330W	-0.151905084270769	0.0626972670954501
YMR227C	TAF7	YMR227C	-0.356579570692222	0.0631268047392807
YDL201W	TRM8	YDL201W	-0.149466649402726	0.0632739554168314
YDR127W	ARO1	YDR127W	0.127699172923233	0.063308218785759
YDR531W	CAB1	YDR531W	0.257657182724024	0.0634167057997992
YJR121W	ATP2	YJR121W	0.147494837958725	0.0636295899736466
YNR031C	SSK2	YNR031C	-0.198680849707181	0.0636343682267968
YLR221C	RSA3	YLR221C	0.227961758321115	0.0637818181900143
YDR137W	RGP1	YDR137W	0.143711490009498	0.0639660702313966
YGR145W	ENP2	YGR145W	-0.203407184680785	0.0643380408489882
NA	NA	NA	-0.113480442127958	0.0645574807754901
YPL049C	DIG1	YPL049C	0.154708961552995	0.0645666304269398
YPL081W	RPS9A	YPL081W	-0.558763101120931	0.0787795283207768
YPL155C	KIP2	YPL155C	0.283390633246892	0.139092859126896
YPR131C	NAT3	YPR131C	0.254178675435053	0.0652318193426263
YJL063C	MRPL8	YJL063C	0.302272412870821	0.0652474416655414
YOR119C	RIO1	YOR119C	-0.164924065305733	0.0652513749861813
YOR254C	SEC63	YOR254C	-0.135563723916061	0.0652559366281817
YBL001C	ECM15	YBL001C	0.261067565008403	0.0653367246290285
YHR023W	MYO1	YHR023W	-0.172546613702973	0.0654017590817442
YGL201C	MCM6	YGL201C	-0.141395609013252	0.0654868201613365
YOR271C	FSF1	YOR271C	0.152767332369862	0.0658124246663856
YLR454W	FMP27	YLR454W	-0.217975146080359	0.0659675762195164
YDR515W	SLF1	YDR515W	0.193637108711087	0.0663294257697084
YLR248W	RCK2	YLR248W	-0.154469697651841	0.06640332140042
YKL210W	UBA1	YKL210W	0.101801040083654	0.0667081799248804
YJL176C	SWI3	YJL176C	-0.144015320804893	0.0667350146448838
YHR084W	STE12	YHR084W	-0.219699261785543	0.067065916389563
YGR148C	RPL24B	YGR148C	-0.180439917503257	0.0672940387908576
YLL041C	SDH2	YLL041C	0.490157268904934	0.0673626660918641
YPL074W	YTA6	YPL074W	0.239280652429141	0.0677200174509069
YER180C-A	SLO1	YER180C-A	-0.355790286878594	0.0937722537763984
YCR094W	CDC50	YCR094W	0.259599871116148	0.0722136878537816
YJL164C	TPK1	YJL164C	0.600372583750595	0.0722996220774208
YGL252C	RTG2	YGL252C	0.10765165419696	0.0683013101693239
YNL313C	EMW1	YNL313C	-0.130494460763277	0.0683263826590933
YKL215C	OXP1	YKL215C	0.12084919168182	0.0688920624707665
YML096W		YML096W	0.340802284769786	0.0692620074557033
YDL143W	CCT4	YDL143W	-0.10905295052487	0.0696797522441005
YDR480W	DIG2	YDR480W	0.301610132302244	0.0697650596963154
NA	NA	NA	0.117859651713765	0.0699633271708192
YPR036W	VMA13	YPR036W	0.156299224525103	0.0702849355269188
YGR116W	SPT6	YGR116W	-0.109422725388743	0.0708950574551706
YKR008W	RSC4	YKR008W	-0.189157115810218	0.0709626351878127
YOL088C	MPD2	YOL088C	0.18548704473119	0.0710477241163577
YIL047C	SYG1	YIL047C	0.170936632965635	0.0731568050468779
YJR111C		YJR111C	-0.227369414868992	0.0715902375176805
YIL098C	FMC1	YIL098C	0.566876916152221	0.0716088594007697
YDR481C	PHO8	YDR481C	0.168082871759282	0.0720034411685007
YGL087C	MMS2	YGL087C	0.21796957925784	0.0721551322766203
YER172C	BRR2	YER172C	-0.141691639375715	0.0721838406707566
NA	NA	NA	-0.143763130465132	0.072230157493848
YML030W	RCF1	YML030W	-0.392929145058826	0.0741805921103385
YPR141C	KAR3	YPR141C	0.267061395815816	0.0726569744724951
YML103C	NUP188	YML103C	0.140976910123289	0.0726875382506371
YPR154W	PIN3	YPR154W	0.215843035191064	0.0727356080903676
YOR231W	MKK1	YOR231W	-0.168271845850157	0.0920785961538745
YHR196W	UTP9	YHR196W	-0.231991994740248	0.0729497469165557
YEL002C	WBP1	YEL002C	-0.1682485779471	0.0730280121437981
YLR011W	LOT6	YLR011W	-0.173024751454491	0.0730675690406266
YFL036W	RPO41	YFL036W	0.163191118171142	0.0731028674708285
YOL109W	ZEO1	YOL109W	-0.299152008414524	0.0731695980732393
YDL145C	COP1	YDL145C	0.113198470799922	0.0732360302226535
NA	NA	NA	0.167953454938207	0.0732486915552109
YBR112C	CYC8	YBR112C	-0.120639023524038	0.0733026329336338
YJR067C	YAE1	YJR067C	-0.272966472497135	0.0733452901879878
YLR403W	SFP1	YLR403W	-0.251898373553921	0.0733589059048431
YGR074W	SMD1	YGR074W	-0.54282285686849	0.0754501835562597
YOR330C	MIP1	YOR330C	0.273206591375825	0.0754934342433697
YLR028C	ADE16	YLR028C	0.120437521834571	0.0740800184192397
YJR010W	MET3	YJR010W	0.768235406781201	0.0783630291663991
YOR138C	RUP1	YOR138C	0.250074943839493	0.0744939218560311
YHR172W	SPC97	YHR172W	0.210559363378088	0.0754285540976921
YJR097W	JJJ3	YJR097W	-0.364549906939228	0.0854864810504809
YPL028W	ERG10	YPL028W	-0.11954460009936	0.0754732281566426
YNL288W	CAF40	YNL288W	-0.363021469661799	0.0754972194191944
YML078W	CPR3	YML078W	0.218269573818926	0.0755665086364575
YMR058W	FET3	YMR058W	-0.188701213626395	0.0757198731219332
YDR088C	SLU7	YDR088C	-0.248591523655225	0.0757755116140232
YGL107C	RMD9	YGL107C	0.157595716957559	0.0758737302652526
YOR320C	GNT1	YOR320C	-0.119653264242562	0.0760029629308022
YBL067C	UBP13	YBL067C	-0.265299950715466	0.0760371767771222
YHR174W	ENO2	YHR174W	-0.126383112302662	0.0760933900405734
YPR041W	TIF5	YPR041W	-0.099870421503244	0.0761334845275621
YOR141C	ARP8	YOR141C	0.158859554376278	0.0761370116015363
YFR037C	RSC8	YFR037C	-0.135316653309786	0.0763644598911675
YGR191W	HIP1	YGR191W	-0.251754115781775	0.113773766118528
YAR008W	SEN34	YAR008W	-0.348544194944083	0.0879024431114392
YOL065C	INP54	YOL065C	0.155583010253903	0.0779686613932561
YDL064W	UBC9	YDL064W	-0.144133943190045	0.0780959703127151
YNL016W	PUB1	YNL016W	0.163403284260205	0.0781197945920239
YPL019C	VTC3	YPL019C	0.173523152809249	0.0784798348077139
YML022W	APT1	YML022W	-0.190605860096142	0.0785503145423448
YKL137W	CMC1	YKL137W	0.210178669014056	0.0786934818986217
YBL037W	APL3	YBL037W	0.194644782844829	0.0787128482832589
YMR109W	MYO5	YMR109W	0.125840865370748	0.0787942968921237
YER050C	RSM18	YER050C	-0.517537539284952	0.0789348046745193
YPL199C		YPL199C	-0.140171236001965	0.0789722136158894
YPL271W	ATP15	YPL271W	-0.279765522183972	0.0790082407372329
YOL082W	ATG19	YOL082W	0.333254410575048	0.0792021361137548
YMR234W	RNH1	YMR234W	-0.252317755059348	0.10603220693687
YPL010W	RET3	YPL010W	-0.137871743159547	0.0794989205833458
YHR018C	ARG4	YHR018C	0.123812999932419	0.0796087695422348
YOR215C	AIM41	YOR215C	0.168000024591571	0.0797086763797373
YDR392W	SPT3	YDR392W	0.518192445487358	0.0839732277350002
YBR198C	TAF5	YBR198C	-0.107627497640699	0.0798991024241252
YLR022C	SDO1	YLR022C	-0.190067100870632	0.0802093156367301
YMR158W	MRPS8	YMR158W	0.182253980073323	0.0804876006682276
YIL126W	STH1	YIL126W	0.112429890307094	0.0805708117453838
YBR172C	SMY2	YBR172C	-0.121987754851688	0.0805984960272202
YDR148C	KGD2	YDR148C	0.150574771099091	0.0806385086520499
YHR179W	OYE2	YHR179W	-0.183612255026127	0.0806751056664647
YER092W	IES5	YER092W	-0.452327026302978	0.100426112512845
YHR190W	ERG9	YHR190W	-0.136501019607273	0.0812254730832329
YNL036W	NCE103	YNL036W	0.700819705934997	0.0812388506166026
YHR206W	SKN7	YHR206W	-0.272066184111353	0.0814903334942288
YBR234C	ARC40	YBR234C	0.138527021243497	0.0817493936701422
YPR148C		YPR148C	0.126044972704896	0.0819572592649742
YDR237W	MRPL7	YDR237W	0.178395500688669	0.0820821161497669
YOR250C	CLP1	YOR250C	-0.268025026029242	0.0821342075341268
YOR192C-B		YOR192C-B	0.264824629679936	0.158019607050841
YER043C	SAH1	YER043C	-0.144747222833175	0.0826939221067185
YIL033C	BCY1	YIL033C	0.151257915125019	0.082878038515179
YIR036C	IRC24	YIR036C	0.121815655741297	0.083903637209121
YNL297C	MON2	YNL297C	0.141033801788463	0.0840204542838547
YMR110C	HFD1	YMR110C	0.20308410342675	0.0841656285564452
YJR104C	SOD1	YJR104C	-0.119515507866829	0.0845033492671097
YDR427W	RPN9	YDR427W	0.119078346129644	0.0847178398821458
YGR171C	MSM1	YGR171C	-0.260346115384444	0.084771487647902
YBR060C	ORC2	YBR060C	0.507257892428523	0.0917555075477857
YDR264C	AKR1	YDR264C	-0.408054414696842	0.0850838118132545
YFR025C	HIS2	YFR025C	-0.16905291328133	0.0851837640685979
NA	NA	NA	0.118571003646679	0.0852224788595719
YKL203C	TOR2	YKL203C	-0.218939318366125	0.0858220439597047
YLL043W	FPS1	YLL043W	0.274409725704754	0.0858386879268321
YAL030W	SNC1	YAL030W	0.344886126688937	0.0858785534954053
YPR169W	JIP5	YPR169W	-0.196396392993176	0.0860044687110682
YJL136C	RPS21B	YJL136C	-0.114920927479062	0.0860943542139298
YMR215W	GAS3	YMR215W	-0.160146699460245	0.0863686374007618
YOR289W		YOR289W	0.292969277134439	0.096852940818506
YPL170W	DAP1	YPL170W	0.143513547002172	0.086619064557476
YGL027C	CWH41	YGL027C	-0.11067012510091	0.0867139787590765
YDL006W	PTC1	YDL006W	0.206636538140646	0.0868872636918127
YPL254W	HFI1	YPL254W	-0.270467257336914	0.0870191888756035
YHR001W-A	QCR10	YHR001W-A	-0.54892706467956	0.0875269583229719
YKL196C	YKT6	YKL196C	0.128299904481437	0.087638627621265
YOL087C	DUF1	YOL087C	0.127154241501607	0.0877210941777295
YKR003W	OSH6	YKR003W	0.12796859615705	0.0878480608474833
YOL021C	DIS3	YOL021C	-0.12692589347542	0.0880484976981879
YPL249C-A	RPL36B	YPL249C-A	-0.245375759962773	0.0880575535078056
YMR304W	UBP15	YMR304W	0.146893365018638	0.0880841703256124
YFL025C	BST1	YFL025C	-0.39627591631087	0.115264188810105
YNL191W	DUG3	YNL191W	0.164927443678774	0.0884188144547924
YLR244C	MAP1	YLR244C	-0.132583424717549	0.0885187213501464
YOR216C	RUD3	YOR216C	-0.159716029858092	0.0885775431254258
YDL175C	AIR2	YDL175C	0.21000348694367	0.0886710358040575
YLR257W		YLR257W	0.125242156698569	0.0886726148628409
YNL059C	ARP5	YNL059C	-0.157358801696972	0.0887381878250408
YPL144W	POC4	YPL144W	-0.353155195572018	0.0887760843630829
YPL151C	PRP46	YPL151C	0.175474489563225	0.0893941732373153
YCL014W	BUD3	YCL014W	0.135299848243804	0.0897872919754161
YHL011C	PRS3	YHL011C	-0.134329368195825	0.0898517057444464
YPL020C	ULP1	YPL020C	0.240229548444162	0.0904948195208994
YHR049W	FSH1	YHR049W	-0.202850604232196	0.0908732057305854
YDR391C		YDR391C	0.229139470656111	0.0909191482539722
YEL034W	HYP2	YEL034W	-0.16712885292214	0.0909835158934989
YDR175C	RSM24	YDR175C	0.152743884112105	0.0913052894747751
YDR021W	FAL1	YDR021W	0.351177793713006	0.0913803088579002
YNL051W	COG5	YNL051W	-0.252498047378669	0.0915995422014906
YOL068C	HST1	YOL068C	-0.213507230737655	0.0937699214109325
YBR062C		YBR062C	0.224297534098564	0.0919189711248668
YDL147W	RPN5	YDL147W	0.131831203620319	0.0921657192851346
YPL117C	IDI1	YPL117C	-0.131503856431745	0.0922846239698634
YFR049W	YMR31	YFR049W	0.264203609491553	0.0924183306690815
YBR094W	PBY1	YBR094W	-0.125507317752081	0.0924901450622267
YPL266W	DIM1	YPL266W	-0.150971074594526	0.0927088801374542
YPL105C	SYH1	YPL105C	-0.120488842689607	0.0928689502879353
YAL035W	FUN12	YAL035W	-0.119649953541504	0.0931769163900457
YGL161C	YIP5	YGL161C	-0.230407925998673	0.0932419800457947
YLR274W	MCM5	YLR274W	-0.128698335729389	0.0932520722175646
YOR213C	SAS5	YOR213C	0.310280212315977	0.113289561853733
YLR441C	RPS1A	YLR441C	0.16333288174458	0.0933439643570635
YIL106W	MOB1	YIL106W	-0.227807643518229	0.0933886575732014
YDR405W	MRP20	YDR405W	-0.199550834253415	0.0936209198198386
YDR007W	TRP1	YDR007W	-0.248862864123261	0.0936427730430614
YDR381C-A		YDR381C-A	0.230910642015733	0.0958312581490364
YGL055W	OLE1	YGL055W	-0.256552033267706	0.094109778793753
YKR014C	YPT52	YKR014C	0.161169568533762	0.0943614185097677
YDR382W	RPP2B	YDR382W	0.16508418177105	0.0945775787933894
YPR048W	TAH18	YPR048W	-0.164171622111613	0.0946443067730766
YEL058W	PCM1	YEL058W	0.0917115843687526	0.0947850307952453
YGR220C	MRPL9	YGR220C	-0.202474324015732	0.0951628708974589
YBR236C	ABD1	YBR236C	0.15753151200342	0.0953147471488917
YPL099C	INA17	YPL099C	0.270174074965869	0.122846525915915
YGR097W	ASK10	YGR097W	0.187464622370616	0.100153845762086
YML028W	TSA1	YML028W	-0.178293121159335	0.0964771892977661
YOR124C	UBP2	YOR124C	0.105916378994355	0.0964965720081912
YMR277W	FCP1	YMR277W	-0.130396348830836	0.0966684545974154
YOL086W-A	MHF1	YOL086W-A	-0.281034226810917	0.0986728934580193
YDR075W	PPH3	YDR075W	-0.401042425004487	0.111416368075316
YGL115W	SNF4	YGL115W	-0.12892047902324	0.0968771169250036
YMR202W	ERG2	YMR202W	0.185301732550922	0.0969101902317288
NA	NA	NA	-0.120647991585173	0.0970068355672124
YGL086W	MAD1	YGL086W	-0.163356414721154	0.0972550927742778
YPL023C	MET12	YPL023C	0.134180290652345	0.097519238266871
YAR042W	SWH1	YAR042W	0.132512156939562	0.0976487200880888
YNR029C		YNR029C	0.170985002491797	0.098049705607348
YDR464W	SPP41	YDR464W	0.180136444664431	0.0983547696375766
YPL094C	SEC62	YPL094C	-0.169345501894792	0.0986842937139409
YMR144W		YMR144W	-0.426686868959472	0.118794184871202
YJR022W	LSM8	YJR022W	0.420088625135683	0.103210713287872
YDR238C	SEC26	YDR238C	-0.0923073747055483	0.0992042377301737
YPL260W		YPL260W	0.119769391933666	0.0996324159457894
YOR198C	BFR1	YOR198C	-0.101564619334361	0.0997006252286212
YGR156W	PTI1	YGR156W	-0.182366522845271	0.0997011102342531
YEL013W	VAC8	YEL013W	0.108941056941049	0.10028577476899
YDR328C	SKP1	YDR328C	-0.145298607530957	0.100375687692623
YIL144W	NDC80	YIL144W	-0.325465199375298	0.100425635223804
YER025W	GCD11	YER025W	-0.107040961021944	0.100704431968369
YFL016C	MDJ1	YFL016C	0.119129094887882	0.100857914863221
YPL110C	GDE1	YPL110C	0.282641528957168	0.100858686568485
NA	NA	NA	-0.258093563808224	0.111594265752622
YDL236W	PHO13	YDL236W	0.110864898787142	0.10117195828769
YML062C	MFT1	YML062C	-0.16653251388227	0.101437163160652
YGL067W	NPY1	YGL067W	-0.175968277801474	0.101651121072746
YOR091W	TMA46	YOR091W	-0.150223343947513	0.102192132779316
YPL012W	RRP12	YPL012W	0.135317947457189	0.102238352643769
YDR143C	SAN1	YDR143C	-0.143365826203652	0.102285029836496
YLR045C	STU2	YLR045C	-0.170491450757478	0.102323309643955
YIR001C	SGN1	YIR001C	-0.185715264706282	0.102333462181053
YML117W	NAB6	YML117W	0.114719076784716	0.103118827650064
YHR158C	KEL1	YHR158C	0.117548642090384	0.103148517849643
YOR281C	PLP2	YOR281C	0.101170812237299	0.103339418720066
YGR264C	MES1	YGR264C	-0.101035781023143	0.103384111948275
YNL041C	COG6	YNL041C	0.186105341604652	0.103902174590328
YGL178W	MPT5	YGL178W	0.232507761784813	0.124306775396861
YBL005W-B		YBL005W-B	0.596007223542557	0.111550820718446
YMR296C	LCB1	YMR296C	-0.104782642142041	0.104825681044653
YDR510W	SMT3	YDR510W	0.130366604129289	0.104903014123824
YKL139W	CTK1	YKL139W	-0.168249605783693	0.105014106143053
YBL031W	SHE1	YBL031W	-0.423993016052016	0.181916034006441
YDR356W	SPC110	YDR356W	-0.18300919534601	0.105532740928525
YOL006C	TOP1	YOL006C	-0.119745202430686	0.105701799013415
YOL124C	TRM11	YOL124C	-0.132156030992228	0.10617868697025
YER064C	VHR2	YER064C	-0.523157177409193	0.126386167248603
YGR001C	EFM5	YGR001C	-0.178324319832726	0.106466683645682
YLR175W	CBF5	YLR175W	-0.097754607538743	0.106505438019392
YDR496C	PUF6	YDR496C	-0.12152720491812	0.106686934557192
YDR376W	ARH1	YDR376W	0.166569631750225	0.106990252537176
YPR133C	SPN1	YPR133C	-0.133895545924446	0.107051793261711
YBR086C	IST2	YBR086C	0.135592185327489	0.107739617026588
YCR002C	CDC10	YCR002C	-0.102364334408048	0.108180817680158
YJR125C	ENT3	YJR125C	-0.141650503308451	0.108379183017135
YJL084C	ALY2	YJL084C	0.111541850664832	0.108479492362501
YKL106W	AAT1	YKL106W	-0.178204264797301	0.108567710703894
YDR031W	MIX14	YDR031W	0.30380970252423	0.109092020638617
YDR378C	LSM6	YDR378C	-0.2354744703824	0.109718258569051
YHR121W	LSM12	YHR121W	0.15958376366293	0.109730767982883
YKL101W	HSL1	YKL101W	-0.17413329695939	0.109815207591321
YGL234W	ADE5,7	YGL234W	0.0972275536158662	0.109818802357204
YHR128W	FUR1	YHR128W	0.0974454645951539	0.110277222265628
YFL028C	CAF16	YFL028C	0.239213557188737	0.110429975452356
YPL237W	SUI3	YPL237W	-0.109588999113356	0.110439036272431
YDR384C	ATO3	YDR384C	-0.591695198054968	0.117802098512113
YLR259C	HSP60	YLR259C	0.0895358133718744	0.110884320211657
NA	NA	NA	-0.110105309902671	0.110943286132614
YLR354C	TAL1	YLR354C	0.0960429340036768	0.111429323096138
YBR061C	TRM7	YBR061C	-0.215563907217582	0.111491802870975
YHR132C	ECM14	YHR132C	0.138870804654168	0.111737115253819
YHR029C	YHI9	YHR029C	-0.134135842345636	0.111857979638014
YHR047C	AAP1	YHR047C	-0.114218639694741	0.112133638185848
YMR027W		YMR027W	-0.0940455002447287	0.112886504680669
YEL026W	SNU13	YEL026W	-0.156219522317052	0.112922667509953
YDR358W	GGA1	YDR358W	0.169266638341455	0.113129309994421
YKR020W	VPS51	YKR020W	-0.337142943034539	0.128097844202196
YJL062W	LAS21	YJL062W	-0.237970413835516	0.115299071759922
YER107C	GLE2	YER107C	-0.164530967341449	0.11343074330227
YGR128C	UTP8	YGR128C	-0.167166892717379	0.113761624224887
YNR011C	PRP2	YNR011C	-0.242230622409942	0.116044433684762
YPR073C	LTP1	YPR073C	0.180976619721825	0.114158175237205
YFR021W	ATG18	YFR021W	0.260813592560886	0.114392301672393
YMR216C	SKY1	YMR216C	-0.109179217534273	0.114978112655202
YBR256C	RIB5	YBR256C	-0.197690708468713	0.115064396448505
YHR148W	IMP3	YHR148W	0.141442287850651	0.115448183842288
YBL006C	LDB7	YBL006C	-0.245409383017947	0.115784535984788
YJL085W	EXO70	YJL085W	-0.14327401263003	0.116005004336438
YMR075W	RCO1	YMR075W	-0.141171152791244	0.116024434059754
YDR372C	VPS74	YDR372C	0.119240552152966	0.116081379856017
YFR050C	PRE4	YFR050C	-0.14149650349739	0.116364064736782
YIR002C	MPH1	YIR002C	-0.267460753617492	0.127131851509969
YHR025W	THR1	YHR025W	-0.132288271816797	0.116612093288664
YLR033W	RSC58	YLR033W	-0.123558673068054	0.116660723356305
YOL004W	SIN3	YOL004W	-0.0988358005994741	0.116979929104525
YKL164C	PIR1	YKL164C	-0.296961052404814	0.117462752151184
YLR442C	SIR3	YLR442C	-0.215966144608476	0.1176498086003
YOR020C	HSP10	YOR020C	0.122663322113375	0.11805306669331
YGL020C	GET1	YGL020C	-0.154846580623786	0.118641805119286
YLL015W	BPT1	YLL015W	0.10971873978264	0.119009452961307
YDR228C	PCF11	YDR228C	-0.125352934986992	0.11973559682901
YHR077C	NMD2	YHR077C	0.143779043049811	0.120165989021039
YMR092C	AIP1	YMR092C	0.119571045770368	0.120343984784469
YLL032C		YLL032C	-0.250486166768795	0.122347985369164
YDR005C	MAF1	YDR005C	-0.283389638826993	0.122795416366024
YOR189W	IES4	YOR189W	-0.245399827292605	0.122821070117634
YMR005W	TAF4	YMR005W	0.116610313126593	0.121089394032871
YPR178W	PRP4	YPR178W	-0.225761369025097	0.121125082699666
YDR091C	RLI1	YDR091C	-0.118585044284409	0.121285046424957
YGR181W	TIM13	YGR181W	0.158992691389908	0.121402287382366
YDR081C	PDC2	YDR081C	-0.182881575187661	0.121429224303405
YBR251W	MRPS5	YBR251W	0.301807683916092	0.121664351849553
YHR028C	DAP2	YHR028C	0.140109618458215	0.122162625873145
YJL166W	QCR8	YJL166W	0.317862508255448	0.122370478484798
YCR052W	RSC6	YCR052W	-0.137507480871879	0.122479353623539
YKL032C	IXR1	YKL032C	0.13138615362525	0.122580492610142
YHR064C	SSZ1	YHR064C	-0.112433197152015	0.122591741999315
YNL024C-A	KSH1	YNL024C-A	-0.520954982693187	0.133178672448708
YML055W	SPC2	YML055W	-0.176149893918989	0.122684730240721
YGL194C	HOS2	YGL194C	-0.248068083469668	0.122786148188286
YCL064C	CHA1	YCL064C	0.20777364826036	0.122804484553295
YGL212W	VAM7	YGL212W	0.21474076162853	0.122964306413325
YJL177W	RPL17B	YJL177W	-0.0908720186270884	0.122994630106127
YPL249C	GYP5	YPL249C	0.132499995870177	0.123018362156107
YLR199C	PBA1	YLR199C	-0.109183868567857	0.123554354614838
YDL148C	NOP14	YDL148C	-0.116011372902904	0.123555877373353
YNL123W	NMA111	YNL123W	0.111441386141454	0.123572627920755
YOL077W-A	ATP19	YOL077W-A	0.278479224144718	0.123958454403303
YMR112C	MED11	YMR112C	0.188406118191796	0.124172263615025
YIR021W	MRS1	YIR021W	-0.447476828714802	0.126343842905704
YNL035C		YNL035C	-0.122037954504766	0.124394109881385
YPL225W		YPL225W	0.125026479151522	0.124531312074425
YJR064W	CCT5	YJR064W	-0.126973291650277	0.124687199415079
YLR214W	FRE1	YLR214W	0.283520908298016	0.12504459172161
YDR296W	MHR1	YDR296W	0.14487549776835	0.125254637410094
YDL029W	ARP2	YDL029W	-0.0865627472206576	0.125382809421346
YFL009W	CDC4	YFL009W	0.232331052106513	0.132551801340975
YFR043C	IRC6	YFR043C	-0.332457973878746	0.125465042080838
YBR242W		YBR242W	-0.279240886976698	0.127491796956058
YKR092C	SRP40	YKR092C	0.286215732192858	0.125572736582622
YPR159W	KRE6	YPR159W	-0.132151966802898	0.125944410848405
YJR143C	PMT4	YJR143C	-0.125728954706371	0.126072942942295
YNL131W	TOM22	YNL131W	-0.140183101165995	0.126151875414669
YOR115C	TRS33	YOR115C	0.207121643415281	0.126192448618363
YER152C		YER152C	-0.188966099482379	0.126287505009803
YGL092W	NUP145	YGL092W	-0.101539373411146	0.126332843415771
YDL088C	ASM4	YDL088C	-0.217375144551159	0.126399499690794
YPL203W	TPK2	YPL203W	0.267014491202218	0.127186446971386
YKR038C	KAE1	YKR038C	-0.247507090530323	0.127396947087544
YLR245C	CDD1	YLR245C	-0.286975219575325	0.129465263016223
YOL061W	PRS5	YOL061W	-0.0970905380169853	0.127799362956751
YCL034W	LSB5	YCL034W	-0.119759567882291	0.12797555622156
YLR352W		YLR352W	0.270838673292719	0.13000443423366
YOL019W		YOL019W	-0.195875317658444	0.12806752013999
YOR090C	PTC5	YOR090C	-0.110179124593994	0.128083661260133
YPR042C	PUF2	YPR042C	0.267630331913256	0.128152307711093
YER089C	PTC2	YER089C	-0.0961278674056523	0.12825654053549
YIL121W	QDR2	YIL121W	0.248056296389272	0.132601553514305
YMR300C	ADE4	YMR300C	0.102065994278675	0.12848067908371
YDL115C	IWR1	YDL115C	0.204139389151209	0.135690605511115
YHR065C	RRP3	YHR065C	-0.141297179969758	0.128579625097487
YBR020W	GAL1	YBR020W	-1.02031815842453	0.132984690975234
YGR235C	MIC26	YGR235C	0.190435951974262	0.129250456772749
YOR101W	RAS1	YOR101W	-0.179094272474924	0.129355300083674
YKR065C	PAM17	YKR065C	0.240029560862844	0.129883615736196
YFR024C-A	LSB3	YFR024C-A	0.138355568500703	0.130008783298411
YMR098C	ATP25	YMR098C	0.300998592344719	0.13727587335614
YML017W	PSP2	YML017W	0.16350901602403	0.130180123133687
YPL006W	NCR1	YPL006W	0.140920295183914	0.13031036797394
YKL180W	RPL17A	YKL180W	-0.231296228310704	0.130790699865914
YNL320W		YNL320W	-0.251245612613854	0.145620965347337
YNR034W	SOL1	YNR034W	0.110801191864748	0.131058387787945
YNL264C	PDR17	YNL264C	0.13505809020123	0.13117107511425
YKL059C	MPE1	YKL059C	-0.308863827237548	0.13118748600097
YDL122W	UBP1	YDL122W	-0.135265636621366	0.131374224647982
YIL078W	THS1	YIL078W	-0.0823165495458262	0.131528509863166
YJR047C	ANB1	YJR047C	0.784709214915392	0.169257763577273
YPL093W	NOG1	YPL093W	-0.11833998591262	0.131901922185977
YDL126C	CDC48	YDL126C	0.100850879361175	0.132132172943234
YKL142W	MRP8	YKL142W	0.121543383332394	0.132625201024768
YIL129C	TAO3	YIL129C	0.177835964294729	0.132955063528301
YGR280C	PXR1	YGR280C	-0.124247140333743	0.133553199578831
YMR260C	TIF11	YMR260C	-0.159965163319182	0.13359299803674
YIL064W	EFM4	YIL064W	0.149402018674937	0.133641487194216
YDR400W	URH1	YDR400W	0.217999781865128	0.133700061462923
YIL038C	NOT3	YIL038C	-0.0965281921769758	0.134214168658856
YDL061C	RPS29B	YDL061C	0.195708622880858	0.134294938237233
YOL103W-B		YOL103W-B	-0.371987637550738	0.134935872264523
YMR145C	NDE1	YMR145C	-0.28755116858056	0.134964018965448
YFR002W	NIC96	YFR002W	-0.111420782142691	0.135058363215472
YER111C	SWI4	YER111C	0.202411099804614	0.135318187735597
YGR133W	PEX4	YGR133W	0.290564366750726	0.142472673055025
YOL096C	COQ3	YOL096C	0.182196039245039	0.135482918012919
YNL154C	YCK2	YNL154C	0.142516885623508	0.135586898822533
YGL120C	PRP43	YGL120C	-0.0934329201111481	0.135681214191227
YGR009C	SEC9	YGR009C	-0.0945687085088629	0.135985055356322
YEL018W	EAF5	YEL018W	-0.35180094520728	0.143184734378269
YLL008W	DRS1	YLL008W	-0.0848492702857122	0.136078492418355
YGL129C	RSM23	YGL129C	0.122998546060462	0.136160051947498
YGL148W	ARO2	YGL148W	-0.100548217156984	0.136590718839722
YML110C	COQ5	YML110C	0.173975717732851	0.136859196982231
YKL095W	YJU2	YKL095W	0.251809027374748	0.136986518443691
YLR421C	RPN13	YLR421C	-0.201712963688816	0.137040092531545
YMR039C	SUB1	YMR039C	-0.228777353986501	0.137110158421972
YNL011C		YNL011C	0.28613381245102	0.141575652621947
YPL235W	RVB2	YPL235W	-0.114934966981458	0.137266777386545
YJL117W	PHO86	YJL117W	0.114137464802944	0.137624006172767
YBL036C		YBL036C	0.0991702485615455	0.137770988984223
YOR352W	TFB6	YOR352W	0.160591853546894	0.137811540178764
YDL110C	TMA17	YDL110C	0.144465389101953	0.13801972248215
YFL039C	ACT1	YFL039C	0.0935409733292047	0.138121173356789
YIL137C	TMA108	YIL137C	0.0882547607597886	0.138229279627091
YBL030C	PET9	YBL030C	-0.151307377572103	0.138269028261971
YPR025C	CCL1	YPR025C	0.18927846705532	0.13840390410633
YPR187W	RPO26	YPR187W	-0.229657878442339	0.138482149963102
YOR069W	VPS5	YOR069W	-0.124485029423266	0.138721565727995
YMR294W	JNM1	YMR294W	-0.219310507200586	0.141332981991698
YMR157C	AIM36	YMR157C	0.195377797108904	0.139568003714308
YNL069C	RPL16B	YNL069C	-0.122420179670037	0.13958773621016
YOR243C	PUS7	YOR243C	-0.123354560019941	0.140213438579659
YDR212W	TCP1	YDR212W	-0.0838505636276352	0.140611861515671
YOR027W	STI1	YOR027W	-0.0872559088200688	0.141037453104945
YPR135W	CTF4	YPR135W	0.120498144753267	0.141431614160075
YDL132W	CDC53	YDL132W	0.0929757742789334	0.141696769937151
YKL130C	SHE2	YKL130C	-0.233136850301452	0.149340071411946
YDR368W	YPR1	YDR368W	0.164092663476829	0.142235503058455
YOL027C	MDM38	YOL027C	-0.123716862439281	0.142245060400878
YDR280W	RRP45	YDR280W	-0.12866742493042	0.142428106698767
YNL110C	NOP15	YNL110C	-0.115367704343182	0.14264896201094
YOR078W	BUD21	YOR078W	-0.142380781154046	0.144649445115408
YGR117C		YGR117C	0.135190982036331	0.143196811837049
YLR328W	NMA1	YLR328W	0.133973597598903	0.143464305675311
YDR177W	UBC1	YDR177W	0.129563838097802	0.143915548769427
Q0140	VAR1	Q0140	0.140828338166049	0.144053472784531
YOR142W	LSC1	YOR142W	0.114713159162655	0.144410989421432
YLR249W	YEF3	YLR249W	-0.083356156662056	0.144423558486379
YBR263W	SHM1	YBR263W	-0.110890799548773	0.144645382244147
YMR314W	PRE5	YMR314W	0.134236842394074	0.14520770635916
YPR074C	TKL1	YPR074C	0.121391080728401	0.145625711998126
YMR185W	RTP1	YMR185W	0.379131238928963	0.16601167222184
YGR159C	NSR1	YGR159C	-0.126223704573579	0.145949763159172
YLR179C		YLR179C	0.176376747502921	0.146109004767524
YJL049W		YJL049W	0.380536675681029	0.146160584916805
YLR372W	ELO3	YLR372W	0.274157459875092	0.146634299987013
YER005W	YND1	YER005W	0.271263636514593	0.146702602811812
YDL086W		YDL086W	0.148310396241193	0.146762446968537
YGR140W	CBF2	YGR140W	-0.314021684564302	0.146849092398304
NA	NA	NA	0.288952256638218	0.146953016657246
YGR271C-A	EFG1	YGR271C-A	-0.194479842964391	0.146998854498942
YGL031C	RPL24A	YGL031C	0.149537792661434	0.14734704870041
YNL273W	TOF1	YNL273W	0.318766316430668	0.162358390765854
YHR058C	MED6	YHR058C	0.320628827822929	0.149655880748734
YGR124W	ASN2	YGR124W	0.105895970603839	0.147953585933599
YMR170C	ALD2	YMR170C	0.186268454715268	0.148597634297697
YIL077C		YIL077C	0.323842810668747	0.148715152145998
YER149C	PEA2	YER149C	-0.211224658610789	0.148920984117108
YGL110C	CUE3	YGL110C	-0.172624375743052	0.149167266782895
NA	NA	NA	-0.165304623235183	0.200896633362903
YHR041C	SRB2	YHR041C	0.155529688972589	0.149518571338403
YDL002C	NHP10	YDL002C	-0.149551061662329	0.149832566532505
YHR197W	RIX1	YHR197W	-0.143888090478445	0.150771334457396
YBR222C	PCS60	YBR222C	-0.10998480771195	0.150937221775184
YPL118W	MRP51	YPL118W	-0.322648779904494	0.151059370581076
YJL133W	MRS3	YJL133W	-0.406717691624213	0.151147412692016
YKL062W	MSN4	YKL062W	0.297014684494204	0.151149557320766
YIL118W	RHO3	YIL118W	-0.134832137377888	0.15134074306953
YER026C	CHO1	YER026C	0.15169689459136	0.151371409600325
YGR024C	THG1	YGR024C	-0.190914817485488	0.155709118952691
YNL180C	RHO5	YNL180C	-0.166261735489023	0.152458248549109
YPL127C	HHO1	YPL127C	-0.148876117958746	0.152562127315977
YGR063C	SPT4	YGR063C	-0.264689701852372	0.152617582507889
YBR175W	SWD3	YBR175W	-0.222297260846556	0.189804632036903
YML112W	CTK3	YML112W	0.167902519780466	0.152791938973521
YDR144C	MKC7	YDR144C	0.28235825589304	0.154919859559821
YIL154C	IMP2	YIL154C	0.184679578103122	0.153404255019645
YNL118C	DCP2	YNL118C	-0.0860777549945517	0.153593166376826
YBR229C	ROT2	YBR229C	0.111818585580359	0.153765350082117
YIL138C	TPM2	YIL138C	-0.107590156664443	0.153911725581532
YIL019W	FAF1	YIL019W	-0.460373533434215	0.174108855817718
YPL221W	FLC1	YPL221W	0.155236548063499	0.154284707988884
YDR424C	DYN2	YDR424C	0.188591137215766	0.154768491004913
YER069W	ARG5,6	YER069W	-0.172808540778362	0.155882742570335
YGR189C	CRH1	YGR189C	-0.179668685673121	0.156108768980276
YGL244W	RTF1	YGL244W	-0.0925346438444414	0.156235282422614
YBR088C	POL30	YBR088C	-0.1425271667893	0.156295178220131
YHR009C	TDA3	YHR009C	0.091565257169389	0.156375808372281
YGR026W		YGR026W	0.192991067085512	0.15658219060574
YDR194C	MSS116	YDR194C	-0.0857084640564842	0.156591957305968
YLR117C	CLF1	YLR117C	0.266189008642776	0.15674571830787
YOL076W	MDM20	YOL076W	0.0979517090752573	0.156821980691327
YGR010W	NMA2	YGR010W	0.142881634816757	0.157072018868888
YPL218W	SAR1	YPL218W	0.187728520937927	0.157539865052774
YKL178C	STE3	YKL178C	0.239398707894512	0.157737870125247
YNL263C	YIF1	YNL263C	0.232897488053194	0.158004973929846
YER014W	HEM14	YER014W	0.122859605625163	0.158188374448909
YGR125W		YGR125W	0.258693995318783	0.160179994273028
YDL168W	SFA1	YDL168W	0.0989367180742704	0.158995925146939
YCL024W	KCC4	YCL024W	-0.207829033568469	0.159275834677454
NA	NA	NA	-0.128694510772974	0.159588373479169
YBR247C	ENP1	YBR247C	-0.106713224909527	0.160155758934735
YKR056W	TRM2	YKR056W	-0.152380644088478	0.160243408411171
YJR063W	RPA12	YJR063W	-0.225392117579737	0.160783102078791
YDL077C	VAM6	YDL077C	0.145856435899738	0.160835228680993
YPL047W	SGF11	YPL047W	0.172904144630024	0.168146020120889
YOR087W	YVC1	YOR087W	0.203553151373935	0.161445354150014
YGL068W	MNP1	YGL068W	0.168502116289631	0.16205410960521
YCL017C	NFS1	YCL017C	-0.132585169555131	0.16275444025752
YKL009W	MRT4	YKL009W	-0.0995537057434248	0.163267579586496
YML010W	SPT5	YML010W	-0.0835020294943867	0.163294746264865
YLR300W	EXG1	YLR300W	0.119948857885806	0.164578487741739
YKL042W	SPC42	YKL042W	-0.167415605959899	0.164839267322367
YOR217W	RFC1	YOR217W	0.153121825001403	0.164998547160301
YDR482C	CWC21	YDR482C	0.188384529801805	0.165390500191531
YER057C	HMF1	YER057C	0.120695487553412	0.165404617057485
YGR005C	TFG2	YGR005C	-0.101153737279226	0.166652590719998
YKR029C	SET3	YKR029C	-0.181875567918233	0.167156842678281
YFL037W	TUB2	YFL037W	-0.117360421681752	0.16730753707043
YLR058C	SHM2	YLR058C	-0.0829828237301982	0.167806215114305
YER009W	NTF2	YER009W	0.113393503394452	0.167991470890961
YFL002C	SPB4	YFL002C	-0.150065671957954	0.16810279106594
YNL064C	YDJ1	YNL064C	-0.126002703973253	0.168305183649959
YJL071W	ARG2	YJL071W	0.483553364044926	0.178980126486226
YGR198W	YPP1	YGR198W	0.141321055074368	0.168881159076769
YKL186C	MTR2	YKL186C	0.261631091023375	0.169278442036634
YLR187W	SKG3	YLR187W	0.164702998945828	0.170556536374523
YDL043C	PRP11	YDL043C	-0.264880869875121	0.172604423091454
YEL024W	RIP1	YEL024W	0.251462757551909	0.170744516083752
YPL259C	APM1	YPL259C	0.220689331603971	0.171475057767425
YOR108W	LEU9	YOR108W	0.158510208640525	0.171509240186026
YLR364W	GRX8	YLR364W	-0.151793198307178	0.173608207797251
YOR110W	TFC7	YOR110W	-0.107765247749949	0.172813081598008
YLR083C	EMP70	YLR083C	0.191335527954998	0.172814250616103
YOR052C	TMC1	YOR052C	0.18871891645821	0.173055521459251
YDL195W	SEC31	YDL195W	0.0808486268568629	0.173096077016774
YDR207C	UME6	YDR207C	-0.143659128184581	0.17336033933252
YGR276C	RNH70	YGR276C	0.191147333960082	0.173573381792969
YNL272C	SEC2	YNL272C	-0.172311562693746	0.173748953811123
YMR197C	VTI1	YMR197C	-0.271926463237229	0.173854285594795
YAL014C	SYN8	YAL014C	-0.22015416874072	0.200808604295361
YBR170C	NPL4	YBR170C	0.0913104127560054	0.174139736730359
YKR068C	BET3	YKR068C	-0.354308356562555	0.178465460406926
YGR040W	KSS1	YGR040W	-0.122233011897649	0.17485888208733
YML080W	DUS1	YML080W	-0.310659719013003	0.175054314473988
YBR057C	MUM2	YBR057C	-0.312527736274191	0.179367445888146
YCR095C	OCA4	YCR095C	0.177883272618104	0.179663850356989
YNL262W	POL2	YNL262W	-0.0759530111287212	0.175666453197599
YGL018C	JAC1	YGL018C	-0.175134935695699	0.175713541721606
YGR086C	PIL1	YGR086C	0.0900583983236416	0.176274733297778
YER136W	GDI1	YER136W	0.135470887882516	0.176555745261599
YER132C	PMD1	YER132C	0.290308017952057	0.250260170965786
YDR484W	VPS52	YDR484W	0.155267613909114	0.17737189440207
YLR150W	STM1	YLR150W	-0.109495934063624	0.177433695427358
YKL216W	URA1	YKL216W	0.166918217019095	0.177435527645283
YGR152C	RSR1	YGR152C	-0.117950540347863	0.177989789521298
YPL055C	LGE1	YPL055C	0.160261158298322	0.178452185083229
YGR094W	VAS1	YGR094W	-0.0705685734510624	0.17950314349434
YPR051W	MAK3	YPR051W	-0.148121773078234	0.179749004946312
YDR196C	CAB5	YDR196C	0.152125181885221	0.179811973712292
YER091C	MET6	YER091C	0.0855855798953087	0.179840639277602
YLR268W	SEC22	YLR268W	-0.162508419360957	0.180089782244404
YBR087W	RFC5	YBR087W	0.124524596579214	0.180664345307461
YPL050C	MNN9	YPL050C	0.124425231453415	0.181146921060246
YMR288W	HSH155	YMR288W	-0.111714108513485	0.181784118674483
YKL073W	LHS1	YKL073W	0.0997673963470085	0.18290304140266
YBL104C	SEA4	YBL104C	0.198573864101608	0.182997051428246
YDL160C	DHH1	YDL160C	-0.0953196840673662	0.183362147330949
YPR010C-A		YPR010C-A	0.33805975509468	0.183409593931644
YPR032W	SRO7	YPR032W	0.146566744633628	0.183682768749451
YGL008C	PMA1	YGL008C	0.0955633873223789	0.183877206100422
YGL171W	ROK1	YGL171W	0.145900534272339	0.184034745061717
YPL234C	VMA11	YPL234C	0.426403574665752	0.184149910118011
YNL007C	SIS1	YNL007C	0.0868600542944158	0.18416733078382
YKR095W-A	PCC1	YKR095W-A	0.158973416999839	0.184201043478087
YIL034C	CAP2	YIL034C	0.0905127121934832	0.184331501019641
YOR001W	RRP6	YOR001W	-0.106822431318957	0.184352819094001
YNR051C	BRE5	YNR051C	-0.154749816731172	0.18441797713041
YBR077C	SLM4	YBR077C	0.131897545383953	0.184495445923209
YDR322W	MRPL35	YDR322W	0.120461126989149	0.186464616076009
YAL023C	PMT2	YAL023C	-0.112416578343478	0.186510534933078
YCR042C	TAF2	YCR042C	-0.103862139241908	0.186603061681031
YPL096W	PNG1	YPL096W	0.220226634701767	0.186697158231229
YDR502C	SAM2	YDR502C	0.147037992067126	0.18678318682053
YOL094C	RFC4	YOL094C	0.0833907035692683	0.187502216687539
YBL103C	RTG3	YBL103C	0.229329086440771	0.187699418362714
YPR008W	HAA1	YPR008W	0.171657851892704	0.188565530155669
YDR435C	PPM1	YDR435C	-0.152262053454955	0.19054685472431
YML067C	ERV41	YML067C	-0.110250803567503	0.189222699684899
YKL100C	YPF1	YKL100C	-0.0966762954088907	0.189906244241253
YLR256W	HAP1	YLR256W	0.694988759711517	0.194707404738634
YBR253W	SRB6	YBR253W	0.357269717765934	0.198022518122043
YOL016C	CMK2	YOL016C	0.160938823739169	0.191247951189621
YDR371W	CTS2	YDR371W	0.222466270507422	0.195452650683419
YHR118C	ORC6	YHR118C	0.280272081004352	0.263458685047086
YNL178W	RPS3	YNL178W	0.0911145391395465	0.192125237774602
YBR227C	MCX1	YBR227C	-0.109436959177813	0.192309844820928
YER020W	GPA2	YER020W	-0.166813718491376	0.192932839573241
YMR047C	NUP116	YMR047C	-0.112733000860047	0.193153857844271
YLR399C	BDF1	YLR399C	-0.0941356092722749	0.193389195220698
YNL308C	KRI1	YNL308C	-0.0920780809876369	0.193471602888758
NA	NA	NA	-0.196679121263525	0.193549787776141
YCL029C	BIK1	YCL029C	0.148789257838427	0.19374682929038
YPL038W	MET31	YPL038W	0.169576187739512	0.243906545814479
YOR310C	NOP58	YOR310C	-0.0827318501775842	0.194856186886227
NA	NA	NA	0.210165040556355	0.19499887461375
YLR208W	SEC13	YLR208W	0.0923728525549734	0.195222961577704
YDL159W	STE7	YDL159W	0.316345859991895	0.24467958443058
NA	NA	NA	-0.341908923945525	0.202843329192516
YBR287W		YBR287W	0.394733734043623	0.231930608595231
YLR020C	YEH2	YLR020C	0.238134606079292	0.1985229320481
YDR050C	TPI1	YDR050C	-0.111597028334003	0.196637640121491
YNL281W	HCH1	YNL281W	-0.12221353311401	0.196781355646915
YOR017W	PET127	YOR017W	0.209591498239259	0.201048460387567
YMR004W	MVP1	YMR004W	0.101163560584567	0.197865407779619
YEL036C	ANP1	YEL036C	-0.0913369695062656	0.198574978640301
YDR346C	SVF1	YDR346C	-0.0880120546638281	0.198594547839984
YFR013W	IOC3	YFR013W	-0.158948191059263	0.199047965263897
YLL012W	YEH1	YLL012W	-0.231222889915891	0.249376103042738
YLR143W	DPH6	YLR143W	-0.150647246291715	0.200466179369267
YKR093W	PTR2	YKR093W	-0.114305596127348	0.200526698486355
YER151C	UBP3	YER151C	-0.0737687925082611	0.200660071854619
YKR055W	RHO4	YKR055W	0.153753269048437	0.201190931665472
YOL142W	RRP40	YOL142W	-0.18926900439245	0.201696330224247
YGR087C	PDC6	YGR087C	-0.568046286004083	0.203994147134452
YGL226C-A	OST5	YGL226C-A	0.173948572778571	0.212120956131329
YLR319C	BUD6	YLR319C	0.0970751338418623	0.202614765383121
YGL124C	MON1	YGL124C	0.224795271513475	0.202960754091204
YHR103W	SBE22	YHR103W	0.097357425053378	0.203013483701783
YBR079C	RPG1	YBR079C	-0.107927746159362	0.203560046227028
YOR369C	RPS12	YOR369C	-0.103892496795545	0.203599767839584
YOR086C	TCB1	YOR086C	0.0746152907474347	0.204132888125134
YLL045C	RPL8B	YLL045C	-0.0775679665539357	0.204458707385396
YOR236W	DFR1	YOR236W	0.165537295580965	0.204801426462806
YJL111W	CCT7	YJL111W	-0.0796906172568654	0.205261188993373
YLR363C	NMD4	YLR363C	-0.322520336263473	0.205451739787502
YGR262C	BUD32	YGR262C	-0.18700075005864	0.20588680103258
YLR406C	RPL31B	YLR406C	0.161692422414362	0.205921349947159
YJL039C	NUP192	YJL039C	-0.0839674181608352	0.206011181309336
YLR342W	FKS1	YLR342W	-0.0835740286831204	0.206193561368475
YNL212W	VID27	YNL212W	-0.0935961082109351	0.206422268340809
YEL050C	RML2	YEL050C	0.249557943814324	0.207301822706393
YNL280C	ERG24	YNL280C	0.147672697516555	0.21146405693239
YLL002W	RTT109	YLL002W	-0.281363081304235	0.211641116255262
YLR396C	VPS33	YLR396C	0.157438818781397	0.207561063713343
YDL181W	INH1	YDL181W	0.305736001979813	0.20761211664066
YDR297W	SUR2	YDR297W	0.158061745415353	0.208109125369289
YML014W	TRM9	YML014W	-0.158802303065166	0.208184957469935
YER159C	BUR6	YER159C	-0.179673581886597	0.208291807057707
YDL052C	SLC1	YDL052C	0.109717951762605	0.208556104588483
YDR063W	AIM7	YDR063W	0.115157278926539	0.208590171593224
YJL218W		YJL218W	0.382086457093596	0.21547724362313
YNL206C	RTT106	YNL206C	-0.107055269419817	0.209000545088007
YHR143W-A	RPC10	YHR143W-A	-0.167677046701488	0.209295225864479
YML114C	TAF8	YML114C	-0.183397899158347	0.213512715898652
YLR222C	UTP13	YLR222C	0.08565326139259	0.209439291206971
YPL184C	MRN1	YPL184C	0.126522341980259	0.209823849040667
YLR380W	CSR1	YLR380W	0.121608806025328	0.210121349639124
YKL104C	GFA1	YKL104C	0.0784079719183914	0.210562283090587
YBR271W	EFM2	YBR271W	0.197473273029878	0.22074015769596
YKR062W	TFA2	YKR062W	0.0997536951208922	0.210865204892878
YKL054C	DEF1	YKL054C	0.0896923308657094	0.21102281896449
YFL017C	GNA1	YFL017C	0.112059976675514	0.211412965266011
YJR091C	JSN1	YJR091C	0.100883606217554	0.211688938365211
YML029W	USA1	YML029W	0.163422761557655	0.211713675453989
YJL153C	INO1	YJL153C	0.856417982488988	0.225740488122245
YHR146W	CRP1	YHR146W	-0.107443139947634	0.212352331061244
YDR460W	TFB3	YDR460W	0.132292221768761	0.212426970941762
YDR300C	PRO1	YDR300C	-0.0990207174960318	0.212834335139402
YKR081C	RPF2	YKR081C	-0.138667634031719	0.212861519388424
YER165W	PAB1	YER165W	-0.0770361092716882	0.213118725697465
YDR341C		YDR341C	-0.0727849798938962	0.213177968349966
YHL034C	SBP1	YHL034C	0.08983016169541	0.213389207964017
YBR199W	KTR4	YBR199W	0.140130713764151	0.213518921556529
YMR064W	AEP1	YMR064W	-0.309414875039831	0.216671113042687
YPL180W	TCO89	YPL180W	0.185361108515302	0.214887684323179
YKL212W	SAC1	YKL212W	0.0822794802461075	0.21492873774134
YMR184W	ADD37	YMR184W	0.190755190227083	0.214995753018429
YHL030W	ECM29	YHL030W	0.0814316998577489	0.215236021035537
YPR037C	ERV2	YPR037C	0.215199041440737	0.215256148779572
YBR145W	ADH5	YBR145W	-0.480254532637186	0.215345332010623
YNL182C	IPI3	YNL182C	-0.113440129191446	0.215621913322349
YLR166C	SEC10	YLR166C	-0.188812980227443	0.215869628718673
YGR214W	RPS0A	YGR214W	0.204615622595011	0.216393698791026
YOR260W	GCD1	YOR260W	-0.0950732357663675	0.21680341043736
YMR089C	YTA12	YMR089C	-0.0963544301002592	0.21766095331623
YLR301W	HRI1	YLR301W	0.116904689188203	0.217788506886952
YCR033W	SNT1	YCR033W	-0.284630502714535	0.217844498058725
YKL002W	DID4	YKL002W	0.116112529817087	0.217954454522186
YOR304C-A	BIL1	YOR304C-A	0.235773933697239	0.236858856704468
YLR357W	RSC2	YLR357W	-0.0822052473792922	0.219142684722076
YJL053W	PEP8	YJL053W	0.189802600522647	0.219184567920903
YGR275W	RTT102	YGR275W	0.149608196248668	0.219215425403482
YOR261C	RPN8	YOR261C	0.107773232361797	0.219256647804188
YDR487C	RIB3	YDR487C	-0.127681267131631	0.219470451446071
YOL012C	HTZ1	YOL012C	-0.162384384085644	0.219653682250283
YBR153W	RIB7	YBR153W	0.23697873123924	0.223796522214782
YDR407C	TRS120	YDR407C	-0.139512645077758	0.219860223418878
YOR122C	PFY1	YOR122C	0.146719861241827	0.219886670314872
YPR016C	TIF6	YPR016C	-0.110680083008553	0.220881792406003
YGL211W	NCS6	YGL211W	-0.188911037850698	0.220942917063749
YER016W	BIM1	YER016W	0.0719093101119057	0.222008149607834
YHR073W	OSH3	YHR073W	0.141698450896136	0.222164010440275
YKL065C	YET1	YKL065C	0.214393048784441	0.222217639541485
YOR201C	MRM1	YOR201C	0.215112934689085	0.222424847198674
YER007C-A	TMA20	YER007C-A	0.0936401160321694	0.222721437539192
YGL098W	USE1	YGL098W	-0.171711575632518	0.223187840315085
YHR169W	DBP8	YHR169W	-0.173948996913676	0.223205254003491
YGL022W	STT3	YGL022W	-0.127897910207334	0.223319272751765
YKR043C	SHB17	YKR043C	0.0913838402782794	0.223615010439013
YOL149W	DCP1	YOL149W	0.0916251148055522	0.224060304314378
YDR432W	NPL3	YDR432W	-0.086487598309624	0.224641680407967
YDR361C	BCP1	YDR361C	0.122924896700741	0.224737767116925
YER019W	ISC1	YER019W	-0.130390209745485	0.225026936361108
YMR102C		YMR102C	0.19964918363236	0.225252581419508
YIL010W	DOT5	YIL010W	-0.13146313627723	0.225735975395432
YDR310C	SUM1	YDR310C	-0.0859967819222334	0.22589909022138
YGR068C	ART5	YGR068C	-0.143154692479097	0.227988604438435
YPR155C	NCA2	YPR155C	0.186019422756896	0.226192780785894
YPR129W	SCD6	YPR129W	-0.0968418258973642	0.226212807401825
YDR394W	RPT3	YDR394W	0.0935256696870894	0.226819078643385
YNL247W		YNL247W	-0.0723022223673517	0.226906396625057
YBR281C	DUG2	YBR281C	0.138620585917913	0.226982764818014
YKR037C	SPC34	YKR037C	-0.247090280198343	0.226999197363802
YGL041W-A		YGL041W-A	-0.324200954472325	0.231729430077942
YBR213W	MET8	YBR213W	-0.208134515746654	0.229729316572493
YPR065W	ROX1	YPR065W	-0.33652867776928	0.229732706628376
YNL260C	LTO1	YNL260C	-0.136998000112175	0.246614969496376
YOR304W	ISW2	YOR304W	0.11631725869788	0.228124205934881
YBR028C	YPK3	YBR028C	-0.138515612518106	0.228218766695808
YLR325C	RPL38	YLR325C	0.0965533671187515	0.228451157416952
YDR240C	SNU56	YDR240C	0.155214373623036	0.228656070423538
YHR063C	PAN5	YHR063C	0.0974953934790541	0.228742157577137
YER001W	MNN1	YER001W	-0.362365981424112	0.228838342529183
YNL306W	MRPS18	YNL306W	0.150726584006556	0.228964200516723
YDL031W	DBP10	YDL031W	-0.0780899543317304	0.2294055408705
YJL104W	PAM16	YJL104W	0.10240439658854	0.22945522629259
YMR178W		YMR178W	-0.0873904343595662	0.229621476837533
YEL003W	GIM4	YEL003W	-0.192602214147563	0.229661651262652
YHR120W	MSH1	YHR120W	0.169418408087967	0.244773642185793
YHL009C	YAP3	YHL009C	-0.104001975985678	0.232150429800673
YLR371W	ROM2	YLR371W	0.269247119947387	0.232352547729186
YMR193W	MRPL24	YMR193W	0.152581176413516	0.233359149975043
YMR267W	PPA2	YMR267W	0.115825502505622	0.233722162770505
YOR123C	LEO1	YOR123C	-0.0829374418866422	0.233755901089336
YFR033C	QCR6	YFR033C	0.20014960818461	0.23389632370638
YMR269W	TMA23	YMR269W	0.237068162934552	0.23391741065742
YML007W	YAP1	YML007W	0.165029031189597	0.234198481408521
YJR068W	RFC2	YJR068W	-0.0765429266460735	0.234200076977788
YPL086C	ELP3	YPL086C	-0.0782289121747617	0.234201323332181
YGR231C	PHB2	YGR231C	0.0869226654517412	0.234377994213861
YDR016C	DAD1	YDR016C	-0.211715888754735	0.281531994902834
YDR236C	FMN1	YDR236C	-0.101574107545325	0.235838233224326
YJL122W	ALB1	YJL122W	-0.184009653262862	0.23621532090761
YEL015W	EDC3	YEL015W	0.112190379640943	0.236547379335557
YPR072W	NOT5	YPR072W	-0.112113092006012	0.236838757604789
YAL031C	GIP4	YAL031C	0.219164228463953	0.238862713569101
YJR103W	URA8	YJR103W	0.0956097530635098	0.237246638254496
YIL133C	RPL16A	YIL133C	-0.151756933591116	0.237254288395486
YAL043C	PTA1	YAL043C	-0.115608335747876	0.237644221587754
YML004C	GLO1	YML004C	0.125768475351656	0.237721706568857
YER155C	BEM2	YER155C	0.0684379455578181	0.237750188989158
YBL097W	BRN1	YBL097W	0.127560229846505	0.247846377180055
YER110C	KAP123	YER110C	-0.0808834433189212	0.238865925972987
YBR205W	KTR3	YBR205W	0.0992406095908933	0.239019920658641
YHR171W	ATG7	YHR171W	-0.312807886839465	0.242967913567404
YNL229C	URE2	YNL229C	0.123329091310993	0.23940006699208
YBR111W-A	SUS1	YBR111W-A	-0.152724941476123	0.243364546272755
YLR170C	APS1	YLR170C	-0.119142606189587	0.239563588678305
YPL169C	MEX67	YPL169C	0.0889452221124643	0.239612797857904
YOR125C	CAT5	YOR125C	-0.239106932646461	0.240342527039478
YML006C	GIS4	YML006C	-0.157196835099167	0.240717604196138
YAL059W	ECM1	YAL059W	-0.138670920954944	0.240998848983316
YGL159W		YGL159W	-0.149922495877362	0.241167391997426
YMR173W	DDR48	YMR173W	0.125994360342649	0.241923096157525
YBR274W	CHK1	YBR274W	-0.249139708366485	0.309344591503761
YER002W	NOP16	YER002W	-0.139393640588334	0.242292990736729
YPL030W	TRM44	YPL030W	-0.128925300372924	0.242407822938293
YNR003C	RPC34	YNR003C	-0.143120206472119	0.242539013644247
YDR359C	EAF1	YDR359C	0.204646805759243	0.24274565070723
YER120W	SCS2	YER120W	-0.0810998639970073	0.242834218406664
YIL051C	MMF1	YIL051C	0.108581847316657	0.243090561910653
YHR187W	IKI1	YHR187W	0.110912939542345	0.243433207601152
YFL034C-A	RPL22B	YFL034C-A	-0.257540332707595	0.243889230727184
YMR183C	SSO2	YMR183C	-0.13928359107824	0.243891820090725
YIL061C	SNP1	YIL061C	-0.199108911147562	0.262415775957066
YDL171C	GLT1	YDL171C	0.0712256810481442	0.244493833293593
YMR062C	ARG7	YMR062C	-0.0942153581636376	0.244823067150211
YGL196W	DSD1	YGL196W	0.140476057721372	0.244854322025074
YDR466W	PKH3	YDR466W	0.183091921565154	0.245203082891147
YKL154W	SRP102	YKL154W	-0.148493746464329	0.245276546824341
YKL021C	MAK11	YKL021C	-0.110853586652393	0.245385424352743
YOL122C	SMF1	YOL122C	-0.299730994227268	0.248270053944886
YLR390W	ECM19	YLR390W	0.170771070518708	0.247612477871817
YLL010C	PSR1	YLL010C	-0.13556393259336	0.272342405120127
YML094W	GIM5	YML094W	-0.157906711676475	0.248281444013129
YPR172W		YPR172W	0.134390010073094	0.248298541353115
YBL105C	PKC1	YBL105C	-0.0688395500077199	0.248326988658513
YJR032W	CPR7	YJR032W	0.0850159976209035	0.248558975208478
YKL110C	KTI12	YKL110C	-0.175329556416525	0.249086882038025
YBR283C	SSH1	YBR283C	-0.109674246651004	0.249171920104219
YJR113C	RSM7	YJR113C	0.121575874370759	0.24925950493081
YOR089C	VPS21	YOR089C	0.0967833424380053	0.2492779202152
YKL004W	AUR1	YKL004W	0.283150715043821	0.253174085901291
YGR186W	TFG1	YGR186W	-0.0909622650484856	0.249373019622486
YNL267W	PIK1	YNL267W	0.102447286407795	0.249737016058668
YKL166C	TPK3	YKL166C	0.170422384699982	0.250140392749545
YLR119W	SRN2	YLR119W	-0.150727277813349	0.251489887444187
YPL064C	CWC27	YPL064C	-0.276965674021007	0.253358270156479
YDR268W	MSW1	YDR268W	-0.176590943139594	0.251793404107531
YBR042C	CST26	YBR042C	-0.141151013053335	0.252027537435071
YBR014C	GRX7	YBR014C	0.189132979899568	0.252226581182501
YDL030W	PRP9	YDL030W	0.19250469760193	0.252693785454948
YER061C	CEM1	YER061C	0.189816417015912	0.253207072181441
YLR388W	RPS29A	YLR388W	-0.142943152002886	0.253796177639464
YCR087C-A		YCR087C-A	-0.162468148198183	0.254719263386543
YJR117W	STE24	YJR117W	0.0803865596261915	0.254925380447842
YFL034C-B	MOB2	YFL034C-B	0.16293518664612	0.26422466333647
YML031W	NDC1	YML031W	-0.155351286248081	0.255040924733719
YDL070W	BDF2	YDL070W	-0.22414589412212	0.264333140651124
YMR208W	ERG12	YMR208W	0.0986292949978207	0.255130959854869
YJR133W	XPT1	YJR133W	0.166561972485461	0.255214606605611
YOL010W	RCL1	YOL010W	-0.0712374604892076	0.255219134364931
YKL063C		YKL063C	-0.207612360086205	0.255397571985163
YGR252W	GCN5	YGR252W	0.172162706882819	0.256505635622169
YJR132W	NMD5	YJR132W	0.152135986044915	0.256682287227019
YDL134C	PPH21	YDL134C	-0.216313591640859	0.25700502663851
YIL115C	NUP159	YIL115C	-0.0750832540683639	0.257139326541423
YGL147C	RPL9A	YGL147C	0.0715754959736401	0.257143724589776
YML091C	RPM2	YML091C	-0.384673111214052	0.25918821287872
YMR014W	BUD22	YMR014W	-0.137847745496845	0.258369267490849
YJL179W	PFD1	YJL179W	0.0789243229144709	0.259165265671424
YDL121C		YDL121C	-0.251633497537412	0.259285695296003
YDL007W	RPT2	YDL007W	0.0816649593045291	0.259385124492673
YKR072C	SIS2	YKR072C	-0.0881280495950918	0.259483432256294
YPL178W	CBC2	YPL178W	-0.207233351200394	0.259839798114123
YOR014W	RTS1	YOR014W	-0.100283964100221	0.260269729968295
YNR033W	ABZ1	YNR033W	0.126303919851264	0.261064341766074
YMR038C	CCS1	YMR038C	-0.0789019345487496	0.262407196800183
YMR192W	GYL1	YMR192W	0.130079235807521	0.262564223905081
YNL189W	SRP1	YNL189W	-0.0824821460518415	0.263006390653847
YIL003W	CFD1	YIL003W	-0.108335183423758	0.263333626854829
YML001W	YPT7	YML001W	-0.110302233632805	0.263382322430623
YGL017W	ATE1	YGL017W	-0.184512615567197	0.264259032502476
YJL096W	MRPL49	YJL096W	0.200779568171033	0.264589746058685
YMR093W	UTP15	YMR093W	-0.102065178925098	0.265264654096305
YMR146C	TIF34	YMR146C	0.0657988854750471	0.265423429224604
YOL056W	GPM3	YOL056W	-0.176332148071296	0.265444297847538
YMR221C		YMR221C	-0.168777259535918	0.283848342159717
YDL116W	NUP84	YDL116W	-0.0832078206500029	0.266619847480161
YDR195W	REF2	YDR195W	-0.137992071673661	0.266946807198571
YOR127W	RGA1	YOR127W	-0.115433880690421	0.271016575047187
YDR056C		YDR056C	-0.189675868636463	0.268071519872904
YMR044W	IOC4	YMR044W	-0.278533665038356	0.271993469680765
YMR309C	NIP1	YMR309C	-0.0747895104300191	0.268357028918575
YLR061W	RPL22A	YLR061W	0.198542730853951	0.268544329451111
YNR032C-A	HUB1	YNR032C-A	0.161076358718983	0.26865645875998
YDR470C	UGO1	YDR470C	-0.125953749050563	0.268670424265251
YGR033C	TIM21	YGR033C	0.130909094731333	0.2692041015315
YER087W	AIM10	YER087W	0.154713271757256	0.269467070704663
YGR083C	GCD2	YGR083C	0.137688023089851	0.269960661532478
YIL076W	SEC28	YIL076W	-0.0837574061166855	0.270604611396834
YGR286C	BIO2	YGR286C	0.150102333138456	0.270627234207985
YNL278W	CAF120	YNL278W	-0.126391806402562	0.270778189634622
YGL064C	MRH4	YGL064C	0.267604829930981	0.271666579394791
YGL026C	TRP5	YGL026C	0.0763947685192079	0.271706283817298
YBL068W	PRS4	YBL068W	-0.0818848315745484	0.27175605836354
YKL028W	TFA1	YKL028W	0.139553031451307	0.273084389464073
YOL081W	IRA2	YOL081W	0.180221462821301	0.274383637623217
YDR159W	SAC3	YDR159W	0.176428205704394	0.274416723315973
YGR049W	SCM4	YGR049W	-0.261471054271109	0.274735738625271
YPR034W	ARP7	YPR034W	-0.112060582259996	0.274901334776229
YGL237C	HAP2	YGL237C	0.180169983021948	0.275160217147294
YMR076C	PDS5	YMR076C	-0.0727782887418762	0.275187531709923
YKL056C	TMA19	YKL056C	-0.104648166267566	0.275475535870692
YOR265W	RBL2	YOR265W	0.0760281163573531	0.275682133946152
YNR067C	DSE4	YNR067C	0.162985886627055	0.277069886689778
YBL038W	MRPL16	YBL038W	0.144513390997787	0.277541042888057
YKL182W	FAS1	YKL182W	0.0606730630837902	0.277585459063949
YPL188W	POS5	YPL188W	-0.186244378672431	0.277954951537157
YOR327C	SNC2	YOR327C	0.0955690979659778	0.278667712526226
YIL053W	GPP1	YIL053W	-0.108274141366259	0.278788948437887
YJL154C	VPS35	YJL154C	0.0910100263272717	0.278932840867823
YPL232W	SSO1	YPL232W	-0.13433996338663	0.279628166845952
YMR270C	RRN9	YMR270C	-0.206948714995097	0.283498744676227
YGL108C		YGL108C	-0.261492381013799	0.28166027247109
YCL057W	PRD1	YCL057W	-0.0762347481012355	0.280550066083515
YOR229W	WTM2	YOR229W	-0.10925139084442	0.280550378102161
YNR043W	MVD1	YNR043W	-0.086100798172275	0.280881490328529
YNL222W	SSU72	YNL222W	0.119167633618421	0.281002950457371
YMR125W	STO1	YMR125W	-0.0574941752227005	0.281100073453514
YDR217C	RAD9	YDR217C	0.244187709305454	0.312459390871015
YLR277C	YSH1	YLR277C	-0.158072268794889	0.283020335798451
YML048W	GSF2	YML048W	-0.123662486226149	0.283305589863904
YMR078C	CTF18	YMR078C	-0.12127491692323	0.283357977999353
YKL214C	YRA2	YKL214C	0.0998045479970173	0.283935281739084
YOR335C	ALA1	YOR335C	-0.056975654683086	0.284212221569124
YLR316C	TAD3	YLR316C	-0.330577935124868	0.327382760581978
YOL051W	GAL11	YOL051W	-0.220275901291824	0.284388609094057
YCL052C	PBN1	YCL052C	-0.129175279421755	0.290609158995128
YAL049C	AIM2	YAL049C	0.116926663714807	0.285117670236501
YBR133C	HSL7	YBR133C	0.21312155337495	0.291590911564715
YNL251C	NRD1	YNL251C	0.0757817526380364	0.286304342253867
YPR063C		YPR063C	-0.150113993693175	0.286552159211721
YKL127W	PGM1	YKL127W	-0.0680034832508767	0.286774639179151
YGL145W	TIP20	YGL145W	0.0976839805251721	0.286899321682207
YMR129W	POM152	YMR129W	-0.0628615589265777	0.286955200608544
YBR159W	IFA38	YBR159W	-0.124560528416623	0.28756449089695
YBR264C	YPT10	YBR264C	-0.139064168752132	0.287755524037436
YJL054W	TIM54	YJL054W	0.0902095073923874	0.288403342638622
YOR056C	NOB1	YOR056C	-0.0931200549352305	0.288728548995519
YOL090W	MSH2	YOL090W	0.0635753676054094	0.289069205223379
YBL050W	SEC17	YBL050W	0.0703274234922588	0.289244831921524
YJL011C	RPC17	YJL011C	-0.129384712046019	0.290932507063851
YKL057C	NUP120	YKL057C	0.121875024560552	0.291103081107038
YDL193W	NUS1	YDL193W	0.166096201577936	0.291363014846052
YHR183W	GND1	YHR183W	0.0871387385880311	0.291719786716096
YLR243W	GPN3	YLR243W	-0.143100365064477	0.3088940575978
YIL161W		YIL161W	0.313788418556651	0.292459028827066
YML119W		YML119W	0.177791376331552	0.292797616749851
YOR278W	HEM4	YOR278W	0.130257859955474	0.292817373935584
YDR473C	PRP3	YDR473C	-0.106974163681443	0.293559216938566
YOR286W	RDL2	YOR286W	0.0606876296644501	0.293653250442532
YHR144C	DCD1	YHR144C	0.158822519772723	0.293829220382482
YLR088W	GAA1	YLR088W	-0.142380073978408	0.29411944686816
YNL215W	IES2	YNL215W	-0.187414688300446	0.294134208194653
YGL206C	CHC1	YGL206C	0.06497120428293	0.294387557054847
YBR196C	PGI1	YBR196C	0.0732074474263342	0.294529416946193
YMR210W		YMR210W	-0.169141477065931	0.317543918013515
YLR206W	ENT2	YLR206W	0.0789151164834152	0.295239909285508
YIR009W	MSL1	YIR009W	-0.254265786244414	0.295703670858819
YOL141W	PPM2	YOL141W	-0.096083680514166	0.300224304384289
YFL034W		YFL034W	-0.136303665463455	0.302660557627914
YFR032C-A	RPL29	YFR032C-A	-0.289819476689459	0.296995868010776
YGR271W	SLH1	YGR271W	-0.0750030941090465	0.297259226244089
YJL128C	PBS2	YJL128C	-0.0813282153182087	0.297263365378754
YLR209C	PNP1	YLR209C	0.0880037812066021	0.297882130102407
YLR025W	SNF7	YLR025W	-0.0937527089795935	0.297940665686491
YOR104W	PIN2	YOR104W	0.202544548324848	0.302079231864996
YOR355W	GDS1	YOR355W	-0.19312277704454	0.30027797064432
YLR086W	SMC4	YLR086W	0.0869828643223585	0.299186133965903
YEL052W	AFG1	YEL052W	0.0850646740158538	0.299394712748774
YDR363W-A	SEM1	YDR363W-A	-0.297564467919536	0.299612015604345
YDR261C	EXG2	YDR261C	-0.180264503239716	0.301385801618128
YDL167C	NRP1	YDL167C	-0.0917441771612211	0.299968531654066
YDL100C	GET3	YDL100C	0.0611181655106954	0.300094047448026
YDR180W	SCC2	YDR180W	0.125866019472586	0.308757878129466
YIL027C	EMC5	YIL027C	-0.107391764441527	0.301138049372972
YGR199W	PMT6	YGR199W	-0.123505638435365	0.301359562682146
YPL115C	BEM3	YPL115C	-0.113201181873006	0.301795088200215
YOL147C	PEX11	YOL147C	0.107103394907746	0.302005971188942
YER073W	ALD5	YER073W	0.0976871904226755	0.302102462780132
YER036C	ARB1	YER036C	-0.0624877367542354	0.302126188515017
YOR035C	SHE4	YOR035C	0.139766889457469	0.3028634764392
YKL145W	RPT1	YKL145W	-0.0736591754875491	0.302992166043685
YPR179C	HDA3	YPR179C	-0.0947350682616204	0.303132328087002
[truncated: 1,545 more rows]

## Sheet: comparison_galactose (Fig.S7C)
UniprotID	StdName	SysName	log2 (ubc8_galactose/ WT_galactose)	p-value.adjusted (ubc8_galactose / WT_galactose)
Q07653	HBT1	YDL223C	3.56972392361355	3.11695878223973e-13
P10963	PCK1	YKR097W	4.51958525209291	8.14850612194428e-08
P06115	CTT1	YGR088W	2.12919374028971	3.6903345801874e-11
P22133	MDH2	YOL126C	1.71699140154989	2.30541372545475e-10
P36013	MAE1	YKL029C	1.51266366429626	1.23129624101062e-09
P53315	SOL4	YGR248W	1.60763802220314	2.31076571055717e-09
P38616	YGP1	YNL160W	2.06820166630594	2.39914072307777e-09
P54114	ALD3	YMR169C	1.33511792358695	6.12993290241483e-09
P36035	JEN1	YKL217W	-2.36149977934196	1.10903258632672e-06
P22943	HSP12	YFL014W	1.61035491575875	8.21778974047449e-09
Q04792	GAD1	YMR250W	1.1825187938917	1.45780432301664e-08
Q03104	MSC1	YML128C	1.34724245612719	1.62672545376494e-08
Q00055	GPD1	YDL022W	0.794690406621946	2.7579369703515e-08
Q12428	PDH1	YPR002W	-2.34500136944519	1.32554887886915e-06
P22214	SEC22	YLR268W	-1.27005115475584	5.67547717215836e-08
P06738	GPH1	YPR160W	0.810350866596657	5.92480344745707e-08
Q06151	DCS1	YLR270W	0.74469836663409	1.05464342657057e-07
Q12449	AHA1	YDR214W	0.563125585614639	1.21282423009253e-07
P38427	TSL1	YML100W	0.701790055878298	1.24726290930007e-07
P49095	GCV2	YMR189W	1.19207819162285	1.26308279456767e-07
P00045	CYC7	YEL039C	1.36509866403393	0.00251392336330771
P53341;P38158	NA	NA	-0.666055506806345	4.90085187087408e-06
P33315	TKL2	YBR117C	2.36587701119784	5.17647195355378e-06
P32623	UTR2	YEL040W	-0.861574594945839	2.96862169185146e-07
Q12443	RTN2	YDL204W	1.7542401712603	3.20425381550541e-07
P39522	ILV3	YJR016C	-0.506425275241508	3.41782005995533e-07
P16547	OM45	YIL136W	0.802307197130702	4.0568060653196e-07
Q12497	FMP16	YDR070C	1.41883310684908	1.6791453535429e-06
Q01896	ENA2	YDR039C	-0.682874834208949	4.77631138420568e-07
Q08926	UIP4	YPL186C	1.25356471416015	7.60755544934274e-06
P14306	TFS1	YLR178C	0.928431261147665	6.68846349700775e-07
P15442	GCN2	YDR283C	-0.792900935275714	6.9007409827676e-07
P40006	IRC22	YEL001C	-1.09798492643495	8.42187716193522e-07
Q12230	LSP1	YPL004C	0.657790807002094	1.03217662389957e-06
P50873	MRK1	YDL079C	-1.277787496003	0.000408859758898582
P40081		YER134C	0.711297469009601	1.4047173498434e-06
P31688	TPS2	YDR074W	0.58765445880104	1.58624360594181e-06
P31539	HSP104	YLL026W	0.433607393692526	1.71836386468397e-06
P47006	RPA34	YJL148W	-1.277258806404	1.86748588252658e-06
P32901	PTR2	YKR093W	-0.683649488052655	2.10055273427162e-06
P32891	DLD1	YDL174C	-0.61850446544447	2.10689649769913e-06
P33327	GDH2	YDL215C	-0.639545843856052	2.22248931857455e-06
Q07551		YDL124W	0.87136777753933	2.5708637581217e-06
P32047	MLF3	YNL074C	0.904729847228037	2.58718661259515e-05
P15992	HSP26	YBR072W	2.37900345737402	3.03537346026435e-06
P38786	RPP1	YHR062C	-0.511831250174446	4.38186611710894e-06
P27476	NSR1	YGR159C	-0.613931939355375	4.46041422936029e-06
P13181	GAL2	YLR081W	-0.707086186687789	0.000721454119399399
P38999	LYS9	YNR050C	0.421154170786878	5.00218712413418e-06
Q02199	NUP49	YGL172W	-0.499536478020616	5.10794661974067e-06
Q3E841	EGO4	YNR034W-A	0.761634938238917	4.4400882641166e-05
P39976	DLD3	YEL071W	-0.89459344667814	6.35411878876675e-06
Q04304		YMR090W	1.1763392431059	6.98447879703402e-06
Q00764	TPS1	YBR126C	0.565390292978051	7.29305790225927e-06
P32356	NTH1	YDR001C	0.395943352298357	8.08340273857961e-06
P53184	PNC1	YGL037C	0.605121627879083	9.30613105505013e-06
P53853	VPS75	YNL246W	0.777709766178997	9.61435989627978e-06
P04807	HXK2	YGL253W	-0.491269375753234	9.76796692147593e-06
P32791	FRE1	YLR214W	-1.20634335029406	9.87489672137562e-06
P32590	SSE2	YBR169C	0.647072642868405	9.95327954710959e-06
Q12035	FCF2	YLR051C	-0.546297422320901	1.010765426941e-05
Q12734	CSR2	YPR030W	-1.44413885951776	6.81798169918273e-05
P36159	TRZ1	YKR079C	-0.486859874181075	1.02322030663627e-05
P00331	ADH2	YMR303C	0.886408874010819	1.08251908415218e-05
Q12153	SSF2	YDR312W	-1.02868350931847	1.71435884580292e-05
P47137		YJR096W	0.70177485415282	1.15861305427005e-05
Q04602	VBA4	YDR119W	-0.652312749415707	1.17147694259409e-05
Q99271	NHA1	YLR138W	-0.641554745578109	2.85934946415813e-05
P36059		YKL151C	0.629054167523254	1.2305588214451e-05
Q02774	SHR3	YDL212W	-0.953065880930392	1.24260993110214e-05
P24583	PKC1	YBL105C	-0.387033660622365	1.29771429939646e-05
Q08045	LCL2	YLR104W	0.515976406343743	1.4611800921351e-05
P32617	IES6	YEL044W	0.793651817331483	1.47756555689308e-05
Q03503	MAK3	YPR051W	-0.700755902550576	1.48147595005118e-05
P34248	YPF1	YKL100C	-0.467623857757683	1.52168965053687e-05
P27705	MIG1	YGL035C	-0.633655496982083	1.59297679307895e-05
Q3E747		YLR363W-A	-0.678151334014348	1.77902006724325e-05
P08466	NUC1	YJL208C	-0.510095736146663	1.83886071141133e-05
Q99296		YLR149C	2.29653037741164	0.00012139610500005
Q03218	MMT1	YMR177W	-0.534415136270368	2.30340874536848e-05
Q01976	YSA1	YBR111C	0.580134502440828	2.72578626062782e-05
P50110	SAM37	YMR060C	-0.636438223963221	2.95054409722371e-05
P13393	SPT15	YER148W	-0.458558644586315	3.12292871762779e-05
P38890	SET5	YHR207C	-0.666573121125847	3.12421090235271e-05
P38697	IMD2	YHR216W	-0.921167762834244	3.27990360867098e-05
P28737	MSP1	YGR028W	0.464695735179856	0.000163834824561159
P47085	MHO1	YJR008W	0.53067602385067	0.000184304836101662
Q12335	PST2	YDR032C	0.523148102864383	3.96959926389225e-05
Q03769	ENT5	YDR153C	-0.344045033038689	3.99549804826544e-05
P41277	GPP1	YIL053W	0.581307484777376	4.04732667051568e-05
P41318	LST8	YNL006W	-0.617348137969305	4.26454491235201e-05
P16467	PDC5	YLR134W	-0.428469220821846	0.00020096620222635
P38013	AHP1	YLR109W	0.568092894289315	5.0061866636116e-05
P25043	PUP1	YOR157C	-0.476218714329335	5.03256917764995e-05
Q99321	DDP1	YOR163W	0.331781118663255	5.17356838668936e-05
P38690		YHR033W	0.449601358818995	0.000229924994851294
Q12315	GLE1	YDL207W	-0.450752727285003	0.000106245550584905
P40471	AYR1	YIL124W	0.399501709912276	5.41629724084858e-05
P32861	UGP1	YKL035W	0.373275624878097	5.43918195179323e-05
P11747	TAF13	YML098W	-0.57407311102487	0.000108558521700294
P09620	KEX1	YGL203C	-0.354850294389347	5.53945181128366e-05
P38341	MIC12	YBR262C	-0.664449723661097	5.61375333639848e-05
Q02159	UBC7	YMR022W	-0.474353192215087	5.63421141131282e-05
Q02516	HAP5	YOR358W	-0.719593031262324	0.000650397180813813
P53738	TRM112	YNR046W	-0.58287258618126	5.94647313846566e-05
P47051	AIM22	YJL046W	0.502339042634571	0.000255054018157417
P53889	FMP41	YNL168C	-0.445887412807171	5.95830171859586e-05
P38840	ARO9	YHR137W	-0.499189738130497	5.96346743969938e-05
P23776	EXG1	YLR300W	0.47067040879406	6.48339559556996e-05
Q03516	RSN1	YMR266W	-0.644757720170176	6.62375261812718e-05
P33442	RPS1A	YLR441C	0.520056080432987	6.63067100940736e-05
Q12046	CWC2	YDL209C	-0.437613845903503	6.66011200742618e-05
P38715	GRE3	YHR104W	0.343219513567238	6.74867254318943e-05
P34228	SEF1	YBL066C	-0.886218228045141	0.00028489451990357
P25379	CHA1	YCL064C	0.721814049601065	6.99425876912249e-05
P61830	HHT1	YBR010W	0.899135070613319	7.02714355772055e-05
P61830	HHT2	YNL031C	0.899135070613319	7.02714355772055e-05
Q05635	RNH202	YDR279W	0.599903679207536	7.4694943546286e-05
P48015	GCV1	YDR019C	0.631220064804776	7.67024615615174e-05
Q12068	GRE2	YOL151W	0.51234214409639	7.77589909066801e-05
Q12033	RIM20	YOR275C	0.703559370773387	0.000110153900439611
P53177	TYW3	YGL050W	0.375432567741143	8.14041910373834e-05
P32480	HIR2	YOR038C	-0.651515306117158	0.000111192038229301
Q06689	INA1	YLR413W	-0.650672136805959	0.000157121488826385
P37012	PGM2	YMR105C	0.446782544158985	8.39409695479173e-05
Q08760	RAX1	YOR301W	-1.64146506888036	0.000162353012265585
P34160	STO1	YMR125W	-0.285914901237788	8.86147970799104e-05
P53292	MRPS35	YGR165W	-0.493653601437408	9.9791832377999e-05
P17649	UGA1	YGR019W	0.372659959558018	0.000102296597906745
P25659	FUB1	YCR076C	-0.489603540028963	0.000387065444149048
Q12438	GRX6	YDL010W	-0.50547871060791	0.000103219351188437
Q04336		YMR196W	1.10336205460153	0.000110739684338986
P28239	PPA2	YMR267W	0.496409810875139	0.000133121784923762
P43564		YFL034W	-0.711862751530482	0.000338931790042642
P36060	MCR1	YKL150W	0.359593474229268	0.000145388530100866
Q04223		YMR130W	-0.660353618955	0.000147690842435455
Q04491	SEC13	YLR208W	0.357587727174067	0.000149108243242197
Q04869		YMR315W	0.473715843561852	0.000149773623184806
P53265		YGR111W	0.47037455779088	0.000149876499155747
P38261	EXO84	YBR102C	0.411438799194812	0.000165730993991034
Q07505		YDL086W	0.499822193316309	0.000172846778116873
P32771	SFA1	YDL168W	0.344326206852617	0.000173051600603746
P19658	EXO70	YJL085W	0.44220227757377	0.000173695023607991
P39986	SPF1	YEL031W	-0.262626153546936	0.000177660060630632
P46988	PFD1	YJL179W	-0.345672495695222	0.00018314891839199
P53146	USE1	YGL098W	-0.693233573271037	0.000184239813369587
P40989	GSC2	YGR032W	-0.742653249840838	0.000316607664348775
P53753	DSE4	YNR067C	0.740158689749414	0.000188283842975216
P14906	SEC63	YOR254C	-0.346000849447048	0.000192327634644765
P01094	PAI3	YMR174C	1.05609348363502	0.000624261583152125
P35183	AST1	YBL069W	0.467451215679439	0.000193957487600259
Q08831	VTS1	YOR359W	0.483275776740438	0.00019501387478703
Q06178	NMA1	YLR328W	-0.440819347926777	0.000197846522573354
Q07688	YPD1	YDL235C	-0.469428451230907	0.000214384053577747
Q03028	ODC1	YPL134C	-0.329390149813527	0.000689089095378699
P25045	LCB1	YMR296C	-0.303376088070138	0.000225575699755706
P32793	YSC84	YHR016C	0.368967346334735	0.000236749447832161
Q06688	BER1	YLR412W	-0.738980303166908	0.000405687176857804
P12687	MRP7	YNL005C	-0.325029410161225	0.00025293488827699
Q02961		YPL113C	-0.479096501515329	0.000771148225264651
P17695	GRX2	YDR513W	-0.485654018595138	0.000255720312069945
Q03362		YDR476C	-0.553237785624756	0.000263982656619698
P40048	PTP3	YER075C	0.490490231479718	0.000269495809753975
P31380	FUN30	YAL019W	-0.441291988824251	0.000272310836915826
P39010	AKR1	YDR264C	-1.08074592555028	0.000274551039670562
Q08206		YOL036W	0.5945142370946	0.00172955366884893
P33204	ARC19	YKL013C	0.572075345345532	0.000284697141515399
P33416	HSP78	YDR258C	0.311326483326301	0.000285284803629917
P23542	AAT2	YLR027C	0.271675669435858	0.000292777098311564
P53925		YNL115C	0.522318246096106	0.000299285815093505
Q3E776		YBR255C-A	0.718944126261853	0.000488842930673187
P32332	OAC1	YKL120W	-0.438644355255985	0.000321292357305602
Q03034	FDC1	YDR539W	-0.330676922108591	0.000323490218464805
P53732	MRPS12	YNR036C	0.495981639065121	0.000957520620205586
Q12114	CHS5	YLR330W	0.274414012149787	0.000360548496276998
P38281	APD1	YBR151W	0.388213225985691	0.000363737307157318
P13711	POX1	YGL205W	-2.21283891807793	0.00144365574167949
P38932	VPS45	YGL095C	0.329678207828149	0.000378901716336517
Q12408	NPC2	YDL046W	0.487057074751057	0.00039419100839885
P37303	GLY1	YEL046C	0.2742780533192	0.000394607984343734
O43137		YBR085C-A	0.528117262993938	0.000402949116917963
P38197		YBL036C	0.295876350340571	0.000405299538993796
P07275	PUT2	YHR037W	0.30740972496951	0.000410962468591919
P53912		YNL134C	0.358343729324247	0.000412938374281021
P40055	UTP7	YER082C	-0.346642217692001	0.000420149983080595
Q04432	HSP31	YDR533C	0.548319925170844	0.000423683045648995
Q06346	KEI1	YDR367W	0.539812472862739	0.00558093118153662
P38770	BRL1	YHR036W	-0.503849207472474	0.000438236326041936
Q07454		YDL073W	0.777625177531029	0.000702496720005347
P05759	RPS31	YLR167W	-0.34069429023053	0.000452363947777003
Q02046	MTD1	YKR080W	0.467831735395954	0.000457065830773691
P53144		YGL101W	-0.326722553959836	0.000474509415696407
Q04081	PPM1	YDR435C	-0.433534519779325	0.000587025185240898
P32839	BCS1	YDR375C	-0.526250873430808	0.000960037621980081
P25340	ERG4	YGL012W	-0.322598602821682	0.000512049078260508
P17883	SKI3	YPR189W	0.27346146127114	0.000521586998791915
P40363		YJL068C	0.348837401931775	0.000527741400576201
Q06218	DBP9	YLR276C	-0.241969903825545	0.000529999191674077
P32915	SEC61	YLR378C	-0.607619720508339	0.00054245233280768
Q02256	YVH1	YIR026C	-0.32290551701843	0.000543041579349354
Q04969	SPC2	YML055W	-0.48520878455496	0.000552123572188764
P27472	GSY2	YLR258W	0.360148957803013	0.000552668895309521
P47818	CCC1	YLR220W	-0.416771939211525	0.000560784556388859
P25365	SED4	YCR067C	0.347400622091619	0.000567731123836627
P21951	POL2	YNL262W	-0.240311951715576	0.000568594311910883
P00924	ENO1	YGR254W	0.359194172573517	0.000574961123252657
P28007	GAR1	YHR089C	0.523042864321535	0.000610804009965517
P39726	GCV3	YAL044C	0.553877416927797	0.000614032530382962
Q12355	PST1	YDR055W	0.647786894486249	0.000644089366335732
O13297	CET1	YPL228W	-0.294534371340536	0.000647074066350551
P46959	GCD14	YJL125C	0.349076527961309	0.000649935014810635
Q12460	NOP56	YLR197W	0.265154576321716	0.000671607167119427
P39979	HPA3	YEL066W	0.542942328690359	0.000684767293362165
Q03010	UME1	YPL139C	0.254035185344314	0.000686211311463888
Q12513	TMA17	YDL110C	0.404317965129064	0.000693108621824694
P25649	AHC2	YCR082W	0.622125533544128	0.0223281753537262
Q12012		YOR289W	0.44043221032771	0.0016893812033366
P46676	SUM1	YDR310C	-0.29868564756012	0.000703404447689487
P47045	TIM54	YJL054W	0.359636878017326	0.000707040058469131
Q02647	DYN2	YDR424C	0.548922207030227	0.000726990421686947
P40469	MET18	YIL128W	-0.342996408995695	0.000727599811404565
P32472	FPR2	YDR519W	0.314542903713715	0.000741655273696303
P43321	SMD3	YLR147C	0.612019626035057	0.000743099255226649
P53196	RPN14	YGL004C	-0.41959913714031	0.000747169523489516
Q8TGU7		YBR126W-A	0.523637237851904	0.000758360132826861
P39518	FAA2	YER015W	-1.08842475909217	0.00182295817849866
P04650	RPL39	YJL189W	0.503462587509063	0.000766675343067037
P38314	SDS24	YBR214W	0.496052825377358	0.000775995478340111
P43557	FMP32	YFL046W	0.562547908519988	0.00185053821521139
P37898	AAP1	YHR047C	-0.291950697454428	0.000784436587225385
P47100		YJR029W	1.02947407372665	0.0049069750925614
P25385	BOS1	YLR078C	-0.39334142390712	0.000793421887327711
P38804	RTC3	YHR087W	1.41499965222116	0.000800188562792323
Q12096	GNT1	YOR320C	-0.269123885892014	0.000812887878518619
P36141	FMP46	YKR049C	0.356806014680462	0.000814120227273432
P53896	PGA1	YNL158W	-0.410254390516258	0.00149394245309158
P50095	IMD3	YLR432W	-0.265571210860042	0.000817592512502469
P40414	TPM2	YIL138C	-0.307212489766133	0.000832751048443425
P07278	BCY1	YIL033C	0.347093832824935	0.000851170385846542
P36135	UTH1	YKR042W	-0.361472424675902	0.00085833911788842
P16658	SEN2	YLR105C	1.21404853733567	0.00087694001741114
P36108	DID4	YKL002W	0.385240480721361	0.000877354040388443
P38781	RSC30	YHR056C	-0.391193750560927	0.000892531755114878
P48363	PAC10	YGR078C	0.44146145768833	0.000899977432197747
P13134	KEX2	YNL238W	-0.783100993220511	0.0132962293025005
Q08157		YOL019W	-0.514836811751845	0.000915610138530603
P34162	SRB2	YHR041C	0.433635461217204	0.000917564840641647
Q08986	SAM3	YPL274W	-0.595479579843278	0.000918945839538265
P40088	FTR1	YER145C	-0.53884821696597	0.00092884626380764
Q05874	NNT1	YLR285W	-0.724170073761385	0.000932615855140505
Q07923	LOT6	YLR011W	-0.378069810500879	0.000933990492213622
P32798	COT1	YOR316C	-0.609461226125909	0.000985860382818981
P35719	MRP8	YKL142W	0.320346538843065	0.000992322167373709
P38332	RRT2	YBR246W	-0.409137841133568	0.00180329231659747
P38162	MIX23	YBL107C	-0.340121567352796	0.00189147224422718
Q12396	EMP46	YLR080W	0.980482675349077	0.00243893881066937
P40210	SIP5	YMR140W	0.481645994764964	0.00111051357059315
P40367	LAS21	YJL062W	-0.62602924883743	0.00132626153577636
P37366	CCL1	YPR025C	0.497081481420651	0.00115721935833901
P33333	SLC1	YDL052C	-0.342472011142917	0.00119234507803533
P33328	SNC2	YOR327C	-0.348703373579436	0.0012045020820494
P39994		YEL020C	0.410430201510341	0.00172907565326723
P38325	OM14	YBR230C	0.571700681511423	0.0012291292088848
P53095	DSD1	YGL196W	0.473981066691348	0.00123921015057396
P53228	NQM1	YGR043C	1.95776484187754	0.00126042017215342
Q03434		YML039W	-0.793660171187561	0.0012922930567274
P27882	ERV1	YGR029W	-0.419908374772266	0.00129885158711793
P52920	NBP35	YGL091C	-0.637039696007971	0.00130181071607506
P38230	ZTA1	YBR046C	0.406323135199912	0.00132110476978354
P25555	GBP2	YCL011C	0.254399478248928	0.00134697633580601
P38115	ARA1	YBR149W	0.305069657071968	0.00136667875727519
P32342	SRP21	YKL122C	0.301495981229152	0.00137032161242718
Q08754	BUD7	YOR299W	0.360636844423102	0.00289747503302522
Q03102		YML131W	-0.591211513300124	0.00137544800215138
Q05031	DFG5	YMR238W	0.611918520672138	0.00161921565669177
P30775	MRF1	YGL143C	-0.551593249980687	0.00295907887458439
P53115	INO80	YGL150C	-0.308477922133601	0.00142616496529239
Q12132	USV1	YPL230W	0.461085624933194	0.00304031460488666
P53049	YOR1	YGR281W	-0.462547699349702	0.00145847669472732
P32500	NDC1	YML031W	-0.52430229979511	0.00146972610144502
P32831	NGR1	YBR212W	0.573758966694474	0.00149666048578803
P53728	CPR8	YNR028W	-0.362565852875225	0.00152606913132775
Q04344	HNT1	YDL125C	-0.337670988995722	0.00152857632966645
P54838	DAK1	YML070W	0.244700719062575	0.00153628762441702
P53253	NNF2	YGR089W	-0.552880171830019	0.00154560157260744
P54839	ERG13	YML126C	-0.212994859948523	0.00155660112518718
P43587	YPI1	YFR003C	0.36662376968026	0.00157088689800547
P34227	PRX1	YBL064C	0.403267720924688	0.00162653491576166
P53918	ESBP6	YNL125C	-0.500863732071611	0.00224437395205565
Q07949	PSR2	YLR019W	-0.576877246883534	0.00165255127259312
P40362	UTP18	YJL069C	0.364329024225331	0.00165281725424529
P30605	ITR1	YDR497C	-0.525064064602855	0.00193050971083448
P50094	IMD4	YML056C	-0.248108951142818	0.00168204439087679
P38929	PMC1	YGL006W	0.34342164983503	0.00169298903482487
Q12123	DCS2	YOR173W	0.997921458461363	0.00169315253602181
P32523	PRP19	YLL036C	0.36095524798754	0.00169639115225989
Q12176	MAK21	YDR060W	-0.263801571113813	0.00169848367884126
P41939	IDP2	YLR174W	-0.453738207202058	0.00170101313852196
Q12675	DNF2	YDR093W	-0.386335979135549	0.00171016113589606
P40164	PSY2	YNL201C	-0.289653849365934	0.00171984469497157
P04821	CDC25	YLR310C	-0.32425262831573	0.00172801620897391
P13045	GAL3	YDR009W	-0.350118305721022	0.00361561330998872
Q3E846	COA6	YMR244C-A	0.471720321613148	0.00184377505879356
P12753	RAD50	YNL250W	0.384305525066036	0.00185072599377419
P06843	SPT2	YER161C	-0.959646331591617	0.0117640605113462
P39112	DSS1	YMR287C	0.555496703733006	0.0038142274745602
Q03612		YER138C	-0.482470387313963	0.00195012727313577
Q05949	BUR2	YLR226W	-0.439224180026265	0.00263779606054425
P38271	OPY1	YBR129C	-0.488639407016713	0.00197619473478438
Q07897	CMS1	YLR003C	-0.332767864800978	0.0019825106629153
P38326	SWC5	YBR231C	-0.578052546956027	0.00230755284379986
Q03759		YML108W	0.773387963663115	0.00322230136328599
P38861	NMD3	YHR170W	-0.324689219029537	0.00201324532192623
P36009	DHR2	YKL078W	-0.644846867860497	0.00496107623434786
P39678	MBP1	YDL056W	-0.720687108269338	0.00203940737392814
P32495	NHP2	YDL208W	-0.430190550666275	0.00205825500182478
P53334	SCW4	YGR279C	0.252110345191294	0.00206328743985045
Q08968	FMP40	YPL222W	0.66193257968586	0.00278298460275327
Q08954		YPL199C	-0.281985247615101	0.00207641729194554
Q06651	PIB1	YDR313C	0.36756430332051	0.0041113204622696
P40007	NOP16	YER002W	0.435041783339514	0.00212439145286986
P40513	MAM33	YIL070C	-0.223574065406012	0.00213271164149178
Q3E792;P0C0T4	NA	NA	0.297809772316661	0.00214762171997558
P38266	AIM3	YBR108W	0.375771484279838	0.00216275472113319
P12684	HMG2	YLR450W	0.345524851109989	0.00216964495916733
P43577	GNA1	YFL017C	-0.324657804402467	0.00218574128534531
P38931	SSN2	YDR443C	0.697647890594475	0.00294055884282328
Q06543	GPN3	YLR243W	0.572127340387876	0.00689456510396655
P17255	VMA1	YDL185W	0.187080319041179	0.00229269190263039
Q08096	RCL1	YOL010W	0.226255887650783	0.00230436765364548
P36139	PET10	YKR046C	0.701816889659433	0.0023194144086394
P53313	SDA1	YGR245C	-0.271447929775352	0.00232797905571809
P23180	AIM17	YHL021C	0.548697414445336	0.00234809192552363
P02829	HSP82	YPL240C	0.384283810631473	0.00235134896555066
P07267	PEP4	YPL154C	0.319495034476141	0.00237251465638267
P32353	ERG3	YLR056W	-0.390915767944218	0.00238057680585028
P22146	GAS1	YMR307W	-0.234490456111573	0.00238204510338934
Q12306	SMT3	YDR510W	0.281374936937318	0.00238334694807144
P07259	URA2	YJL130C	0.224040517837562	0.00239496458764071
Q12466	TCB1	YOR086C	0.2097272435063	0.00240333217814032
P37263		YCR087C-A	-0.512109900130298	0.00241372009187862
Q12382	DGK1	YOR311C	-0.355852113161948	0.00243017566102328
P32264	PRO1	YDR300C	-0.283435779366844	0.002440658803717
Q06078	UTP21	YLR409C	-0.337694035530074	0.00245201110367286
P57744	TIM8	YJR135W-A	-0.427811213187859	0.00245240200940742
Q96VH4	HBN1	YCL026C-B	-0.942216928390472	0.00250009220019907
P32351	IMP2	YIL154C	0.455132774717793	0.00250318058053235
P38137	PCS60	YBR222C	-0.269212690172491	0.00250820968976344
P40548	SNL1	YIL016W	-0.291175365675034	0.00251696872630993
Q06636	GPI11	YDR302W	-0.80456183783663	0.00392226662892609
P17157	PHO85	YPL031C	0.275690536301791	0.00253827777840776
P14832	CPR1	YDR155C	0.274483482196715	0.00263690106591655
Q06839		YPR097W	-0.371480073136699	0.00263843607232083
P43569	CAF16	YFL028C	0.517832353852917	0.00264032575385295
P38836	ECM14	YHR132C	0.301571636807299	0.00265662623442108
Q9URQ5	HTL1	YCR020W-B	-0.587211513211475	0.00302940636800181
P38805	RPF1	YHR088W	-0.264543474670869	0.00266833868202111
Q12267	SMC4	YLR086W	0.296654775024884	0.00274717233634936
P40037	HMF1	YER057C	0.302817622161324	0.00274781487666844
Q3E7Z5		YIL002W-A	0.513799385490707	0.00274833687328758
Q08421	ETT1	YOR051C	0.271483246664026	0.0028158483295354
P07258	CPA1	YOR303W	0.772944818179667	0.0028516152024141
P49090	ASN2	YGR124W	0.252180986189373	0.00287749305202616
P23642	VAN1	YML115C	0.361133603197885	0.00290881938344337
Q08924	RTT10	YPL183C	-0.326237339455361	0.00294749649286477
Q12502	LDB19	YOR322C	-0.404828202265143	0.00297190075730592
P25648	SRB8	YCR081W	0.508853469483697	0.0151396599887922
P46673	NUP85	YJR042W	-0.249594108917957	0.00303921435364786
P38998	LYS1	YIR034C	0.343168587865204	0.00309752763777274
P32288	GLN1	YPR035W	0.218765690045128	0.00312160659599083
P53241	VHT1	YGR065C	-0.560719278623381	0.022958537130396
Q12465	RAX2	YLR084C	-0.497883448607567	0.0031847290229573
P04802	DPS1	YLL018C	0.212212784572408	0.00321903757000777
P29547	CAM1	YPL048W	0.198388320714884	0.00323648155142119
P40433	PFK26	YIL107C	-0.490429792144145	0.00419177788291979
P25358	ELO2	YCR034W	-0.551679193839487	0.00424677937178077
Q07878	VPS13	YLL040C	0.188066178846839	0.00331732718331623
P53252	PIL1	YGR086C	0.225527563795893	0.00336490985435947
P53119	HUL5	YGL141W	0.688322713093655	0.00336659861983685
Q02793	SKI8	YGL213C	0.335449468592678	0.00342031440604185
Q03648		YMR209C	0.598584094042842	0.0034408806101586
Q08962	NIP7	YPL211W	0.3228651181659	0.00344786774648541
P40580	IRC24	YIR036C	0.232130184884465	0.00345682368175206
P53898	NSG2	YNL156C	-0.512738217588804	0.00348589016209997
P30657	PRE4	YFR050C	-0.298337215938762	0.00359189952397845
P32599	SAC6	YDR129C	0.222994124089684	0.00362326649706911
P40185	MMF1	YIL051C	0.313524699390406	0.00370644292743229
P53969	SAM50	YNL026W	-0.361523394757498	0.0037100369195308
P19263	RGR1	YLR071C	-0.406656253548121	0.0037297411871946
Q02754		YPL067C	-0.495602597454546	0.00377601402394085
Q12051	BTS1	YPL069C	0.701991796913426	0.00669828911312695
P10363	PRI1	YIR008C	-0.319385429483191	0.00387887538268114
P40579		YIR035C	0.450059838375186	0.00389982027606195
Q08732	HRK1	YOR267C	-0.322325130783263	0.00393307642204914
P33322	CBF5	YLR175W	-0.197161607871319	0.00394577416397949
P36163	OMA1	YKR087C	0.640473224560687	0.00836520580817349
P07269	PHO2	YDL106C	0.422146195034205	0.00594009446009468
P40350	ALG5	YPL227C	-0.479970000471482	0.00407283449510573
P20840	SAG1	YJR004C	0.959158972951496	0.00516862751820159
P16965	STF2	YGR008C	0.610119831820747	0.00412549188443347
Q03758	BUL2	YML111W	-0.431997416406574	0.00414244104588203
P53255	DRN1	YGR093W	0.324880368647332	0.00415408932686378
P38884	AIM18	YHR198C	0.321917619452826	0.00415515197055853
Q12008	GPM2	YDL021W	0.597785309274201	0.00419909826716324
P39704	ERP2	YAL007C	-0.34933487118688	0.00420986041737611
P47110	POL32	YJR043C	0.510524996263264	0.00423235129795411
Q04839	GFD1	YMR255W	-0.750950249083505	0.00475901265166813
P22470	SAN1	YDR143C	-0.281736453710003	0.00428787191459199
Q99278	MED11	YMR112C	0.395767312979739	0.00430036330306916
P36015	YKT6	YKL196C	-0.239359406031895	0.0043592893508876
P05030	PMA1	YGL008C	-0.234337811125414	0.00439475906273626
P38075	PDX3	YBR035C	0.250872554872949	0.00444231111858365
P38705	DIA4	YHR011W	0.619438254259528	0.00560323795608964
P38958	PET100	YDR079W	0.514113432263009	0.00752365405315873
P21560	CBP3	YPL215W	0.246801355852607	0.00451297637056269
Q06063	DUS4	YLR405W	-0.537562290433723	0.0113464167094527
Q03649		YMR210W	-0.578476136295574	0.0144379072399148
P47123	MOG1	YJR074W	0.355186045728495	0.00519027521793788
P20485	CKI1	YLR133W	0.281730434596444	0.00466957194398316
P0C2I9		YPR137C-B	-0.190442216541669	0.00467457147783343
Q02873		YPL107W	0.369736568668998	0.0114462662715242
P08638	LEU3	YLR451W	-0.504016362387908	0.00588252256004395
P11655	SEC12	YNR026C	-0.340994254826168	0.00470613782005698
P53924	DMA2	YNL116W	-0.372083907712078	0.00477510960049107
P04076	ARG4	YHR018C	-0.221129853977853	0.00479121185734897
P38930	CKB2	YOR039W	-0.342785947661596	0.00481089209445088
P39984	HAT2	YEL056W	-0.251619325406306	0.00489707254596466
P46680	AIP1	YMR092C	0.243017771711695	0.00495864562945901
P32331	YMC1	YPR058W	0.289601256935359	0.00496906576503805
P29056	BRF1	YGR246C	0.423241634268557	0.00497172215822493
P39933	PZF1	YPR186C	0.592642956266879	0.00978793097006521
Q08438	VHS3	YOR054C	0.338654879415042	0.00503676178909702
Q03497	STE20	YHL007C	-0.232316833372519	0.00504178610217544
P40474	QDR2	YIL121W	-0.512272327401622	0.00645641538390517
P38627	URA8	YJR103W	0.258652089483594	0.00522335998895073
P43590		YFR006W	-0.20507639651278	0.0052240445354697
P43568	CAK1	YFL029C	-0.629689938741823	0.00528331199368948
P20436	RPB8	YOR224C	0.269153481681474	0.00534719759672093
P50278	SOL1	YNR034W	0.229365324421831	0.00538172984652255
P22023	KRE5	YOR336W	-0.385008860564739	0.00540951538116663
P53108	YIP5	YGL161C	-0.42368978698666	0.00543375155965545
P29311	BMH1	YER177W	0.211370467725459	0.00544883693641855
P25631		YCR051W	0.230315137387354	0.00545528320476454
Q03673	AIM34	YMR003W	0.390549994256915	0.00545673890636462
Q07468	VAM6	YDL077C	0.326482537304152	0.00545902607218426
P46971	PMT4	YJR143C	-0.255992062173213	0.00546059688358781
P53096	HOS2	YGL194C	-0.49987555125983	0.00548811006450878
P36131	SPC34	YKR037C	-0.647470884899882	0.00552158601438528
P15790	CKA1	YIL035C	-0.315245774366691	0.00560282134806458
P39078	CCT4	YDL143W	-0.182852540943209	0.00560614603962994
P49573	CTR1	YPR124W	-0.238884951397274	0.00563967276323449
P39683	NPT1	YOR209C	0.249687321213255	0.00570761868178523
P36017	VPS21	YOR089C	-0.26522399732487	0.00571400392642123
P06168	ILV5	YLR355C	-0.252102025995271	0.00575327448938678
P00431	CCP1	YKR066C	0.323431666146611	0.00575782675158045
P11154	PYC1	YGL062W	-0.338904267702347	0.00577197995428679
P10662	MRP1	YDR347W	-0.229326432290303	0.00578391064130675
Q12159	YRA1	YDR381W	0.219013258958693	0.00590215256130702
P33324		YKL091C	0.443244544762436	0.00590537308853909
P28707	SBA1	YKL117W	0.327887894414371	0.00591629243914549
P36044	MNN4	YKL201C	-0.584524166283664	0.00731418846800192
P38222	RKM3	YBR030W	-0.329219686113866	0.00598212715086604
P22855	AMS1	YGL156W	1.22568129294298	0.00601336618025265
Q06147	LCB5	YLR260W	0.344721155599707	0.00677798414026571
P36136	SHB17	YKR043C	0.233375845968673	0.00618763743066948
P33313	CNS1	YBR155W	0.249103146291471	0.00619774715599063
P48527	MSY1	YPL097W	0.507867398158236	0.00624566034988384
P35178	RRP1	YDR087C	-0.304601785357637	0.00629372355549856
Q12405	LPX1	YOR084W	-0.408859960769835	0.0100254505932816
Q99220	YOS9	YDR057W	-0.425365501297275	0.00634445150673535
P53062	BRR6	YGL247W	0.346507766340164	0.0142089613473467
P48353	HLJ1	YMR161W	-0.551517846742549	0.00643766925175804
P50942	INP52	YNL106C	-0.380156087369212	0.00644911037278719
P47155	ILM1	YJR118C	-0.322771849998126	0.00646354578739438
P07255	COX9	YDL067C	-0.473371487402058	0.00710553402546945
P33401	PGM1	YKL127W	-0.198185178358461	0.00651038525715028
Q04533		YML082W	-0.378010962869066	0.00653324245875813
P38072	SCO2	YBR024W	0.28508973358274	0.0080516932805954
P25372	TRX3	YCR083W	0.367321925222218	0.00662955395962635
P36090	ANR2	YKL047W	0.301519892408351	0.00666408040000654
P32497	NIP1	YMR309C	0.208116642829111	0.00675947811840963
P50874	ORC5	YNL261W	-0.630742406404135	0.00685679741667101
P36101	TCD2	YKL027W	-0.294969639770322	0.00694922280392086
P00958	MES1	YGR264C	-0.184746989163038	0.00694947652645122
Q07845	GRC3	YLL035W	1.19566545891755	0.0152138724063029
Q12181	TAH18	YPR048W	0.291168275676753	0.0070232329051503
P38736	GOS1	YHL031C	-0.330783975359601	0.00705079622737404
P38138	ROT2	YBR229C	0.235591391460108	0.00710603796060842
P20051	URA4	YLR420W	0.279921660423636	0.00714750337507765
Q12458	YPR1	YDR368W	0.333936077298929	0.00727396902474959
Q12078	SMF3	YLR034C	-0.359963055053555	0.00728924129769674
Q12029	FSF1	YOR271C	0.241655990852149	0.00729473894458144
P39543	SOP4	YJL192C	0.625996268289626	0.00733375373768009
Q08223	AIM39	YOL053W	0.47920573996301	0.00895696841429129
P38712	RRP3	YHR065C	-0.275437829024774	0.0074928311150119
P39923	NPR2	YEL062W	0.273537677326132	0.0090661069595613
P31374	PSK1	YAL017W	0.188574059327198	0.00750932291343361
P07285	TRP4	YDR354W	-0.267324044417812	0.00759144236493167
P32463	ACP1	YKL192C	-0.444670149738393	0.00759730993575567
Q03290	TFB3	YDR460W	-0.317993091818312	0.00766584347489674
P29509	TRR1	YDR353W	0.224326578628869	0.00769535143991307
P40218		YMR147W	0.470995573182375	0.0084268320432229
P38988	GGC1	YDL198C	-0.33129290873536	0.00775087363340999
P38688	SRP72	YPL210C	0.2198183857377	0.00778489072548292
P53079	COG1	YGL223C	-0.355423762340955	0.00781667541529929
P27614	CPS1	YJL172W	0.230054134940023	0.00783575175510941
Q03375	CWC21	YDR482C	0.402205726148598	0.00787330104059622
P38216		YBR016W	0.487045763096486	0.00788338150315965
P39993	GEA2	YEL022W	-0.228929557778216	0.00798628814622578
P21182	SPE2	YOL052C	0.243483188342779	0.00800328869221895
P53893	RIA1	YNL163C	0.210202753217583	0.00815312813814268
P23255	TAF2	YCR042C	0.232354948758474	0.00816536128218739
P40030	ERG28	YER044C	-0.487626131324784	0.00891164642433431
Q00578	SSL2	YIL143C	0.378908292800485	0.00821959089522149
P25642	IMG2	YCR071C	0.311580461915611	0.00822313834435015
P14743	NMT1	YLR195C	0.196961190255337	0.00826111303561211
P39985	POL5	YEL055C	-0.204405364428034	0.00830766817373793
P47108	URB2	YJR041C	-0.259809113974896	0.00831867053931
P47150	RSM7	YJR113C	-0.312813588177303	0.00842007463043426
P41903	TES1	YJR019C	-0.643738046972214	0.0101003613011845
Q03833	GIS1	YDR096W	-0.409149173620023	0.00921703129409263
P36039	EMC3	YKL207W	0.431786671744174	0.00847295183669423
Q12362	RIB2	YOL066C	-0.336961813014259	0.00852523377070301
Q02486	ABF2	YMR072W	0.24428943205664	0.00865723887329046
Q02207	FOX2	YKR009C	-0.904232212824404	0.0130401654788722
P33339	TFC4	YGR047C	-0.390132340129107	0.00869762360243487
P38353	SSH1	YBR283C	-0.280314321424086	0.00875056530593917
Q05812	MSC3	YLR219W	0.263635846307707	0.00880140803698034
P08539	GPA1	YHR005C	-0.280231934443346	0.00882549216056187
Q12273		YOL103W-B	-0.71798720636577	0.00885736992829587
Q3E835	MHF1	YOL086W-A	0.44982122150288	0.00966209992004151
Q04338	VTI1	YMR197C	-0.580825050444421	0.00892061175995426
Q99207	NOP14	YDL148C	-0.216185835047582	0.00899477721826549
P40545	HIS6	YIL020C	0.196278812140857	0.00899569274074451
P20459	SUI2	YJR007W	0.226703816319123	0.00899937184701905
P33421	SDH3	YKL141W	-0.423840442553963	0.0108576543661239
P08018	PBS2	YJL128C	-0.22925768067099	0.00913586413087301
P40566	EGH1	YIR007W	0.521900904499844	0.00914451053190521
P48231	TCB2	YNL087W	-0.334785612529405	0.00916098074702118
Q12156	AIM7	YDR063W	0.266249211378415	0.00916521524813287
P37293	NAT2	YGR147C	0.307986479663835	0.00920614262524455
P47061	VPS53	YJL029C	0.235368132038239	0.00922104396463225
P53076	VID30	YGL227W	0.338855475345319	0.00923117001996232
P0CX52;P0CX51	NA	NA	0.182343263512827	0.00923503238469436
P36051	MCD4	YKL165C	-0.323733842689343	0.00928635322733161
P00447	SOD2	YHR008C	0.242047213861273	0.00954527759918374
P52553	YKE2	YLR200W	-0.316390663907413	0.0095724116919355
P29295	HRR25	YPL204W	-0.262274803328506	0.00966874672604905
Q12674	DNF3	YMR162C	-0.377108083406739	0.00975757049880959
P30902	ATP7	YKL016C	0.351537920962389	0.00979630281646494
P43682	SFT1	YKL006C-A	-0.350959240292433	0.0116460496486274
P32330	DGR2	YKL121W	0.392510977986721	0.0166377242895754
P37291	SHM2	YLR058C	0.171590231732687	0.00986660574089416
P53195	COG7	YGL005C	-0.319662517472121	0.00991675145051592
P10591	SSA1	YAL005C	0.206795185434935	0.0100747369165797
P38074	HMT1	YBR034C	-0.208467131630929	0.0101410335299391
P43603	LSB3	YFR024C-A	0.25721630237835	0.0101659391934984
P25441	RPC53	YDL150W	-0.499653711171195	0.0103707510610103
P35732	DEF1	YKL054C	0.20370524979554	0.0105066665745775
P32775	GLC3	YEL011W	-0.46881445144286	0.010524115684234
P38429	SAP30	YMR263W	0.360778460356695	0.0106936491679282
P43621	RET2	YFR051C	0.193990769356112	0.0107344156844148
P32643	TMT1	YER175C	0.308256638576822	0.0118679611118343
P41696	AZF1	YOR113W	-0.264660684048774	0.0110444003497359
P38251	RFC5	YBR087W	0.260683917336397	0.0110533992302495
P32785	FMT1	YBL013W	0.310498905169666	0.0182406748577729
P25576	POF1	YCL047C	0.259218875676282	0.011103549060598
P36007	SRY1	YKL218C	-0.468893070682803	0.0161739232695316
Q12166	LEU9	YOR108W	-0.323592912343148	0.0112033346102976
P40087	DDI1	YER143W	-0.266616001447023	0.0112171636445464
P40483		YIL108W	-0.20264961973459	0.0112281118034052
P53834	HCH1	YNL281W	0.265261686338881	0.0112363228544973
P35127	YUH1	YJR099W	0.320166178295274	0.0113892578026836
P41913	GDS1	YOR355W	-0.563907040637115	0.0122769001658051
P42900	SLS1	YLR139C	-0.407908348126899	0.0123321140930749
Q06705	CSR1	YLR380W	0.271378176097397	0.0114742465310751
P40054	SER3	YER081W	-0.45601950779918	0.0114820100484061
Q05958	ECM22	YLR228C	0.524451679051879	0.016567833123764
P47084	MRX12	YJR003C	-0.230628568249802	0.0115140146028062
P53722	ATP23	YNR020C	0.380915621507846	0.0166072711734143
P38713	OSH3	YHR073W	-0.324691503976911	0.0115642713918809
P33418	LOS1	YKL205W	0.263861883034046	0.0116807918180705
Q03048	COF1	YLL050C	0.272761712134866	0.0116921661493705
Q12525	MHT1	YLL062C	0.410646456977613	0.02214434158139
P47112	TAH11	YJR046W	0.301968140644068	0.0137054867196552
P06197	PIS1	YPR113W	-0.355585478776323	0.0117441159998237
P17709	GLK1	YCL040W	0.244431028512984	0.0118217766880979
P42840		YNL320W	-0.480221847844724	0.0192351865905409
Q04632	COG8	YML071C	-0.255233571405245	0.0118410002681619
P53202	CUL3	YGR003W	-0.41147533602064	0.0626664899046235
P05740	RPL17A	YKL180W	-0.419401222374475	0.0118663997055226
P38737	ECM29	YHL030W	0.182794463055941	0.0118678572496053
P0C2H8	RPL31A	YDL075W	0.189281072017927	0.0119030564007703
Q06668	OMS1	YDR316W	-0.399038305472754	0.0120436650483242
Q12368	SNU23	YDL098C	-0.32562298429966	0.0121238003460689
P53312	LSC2	YGR244C	0.242315411216826	0.012268584276445
Q03707	SRC1	YML034W	-0.214167462653393	0.0123267661372225
Q12439		YOR192C-A	-0.368552342941058	0.0274416614184013
Q99288	DET1	YDR051C	0.227628450237354	0.0123769701321915
Q05584	GLO2	YDR272W	0.189786893669218	0.0124130933545869
Q99394	TRS33	YOR115C	0.367564148181486	0.0124331875896362
P38348	HSM3	YBR272C	0.263029368600161	0.0124697708574263
P38145	RIB5	YBR256C	0.338123114420736	0.0127074747570515
P25344	STE50	YCL032W	-0.36369192704068	0.0127355361700428
P10507	MAS1	YLR163C	-0.186164857077294	0.0128247735536745
Q12236	PKH2	YOL100W	-0.221473716787091	0.0128261736302896
P40578	MGA2	YIR033W	-0.357394989305654	0.0128402983937383
Q08647	PUS7	YOR243C	-0.226203547530027	0.0129043064007027
P39102	XDJ1	YLR090W	-0.259171793911271	0.0129174461682854
Q12184	YAH1	YPL252C	-0.488265442744872	0.0129256701020374
Q08282	PPM2	YOL141W	-0.254514791018497	0.0150315596281517
P48569		YDL183C	0.345201037917384	0.0206926465389472
P43579	IES1	YFL013C	0.294239681121628	0.0129804753445114
Q07527	TRM3	YDL112W	-0.181250402535124	0.0130135177390103
P40043	RGI1	YER067W	-0.421491615732151	0.0131330601534716
P32381	ARP2	YDL029W	-0.151624969266276	0.0131910397359841
P40463	VHS2	YIL135C	0.281100835896318	0.0131943998452155
P42940	CIR1	YGR207C	-0.291948190241772	0.0133051429455961
P00937	TRP3	YKL211C	0.238323486345344	0.0134335240739055
P0CX73;P0CX72;P0CX71;P0CX70	NA	NA	0.652885671260343	0.0134355883603435
P38698	PPX1	YHR201C	0.208871593841025	0.0135860249732289
P06245	TPK2	YPL203W	0.466928440289628	0.01369760289254
Q12094	TSR3	YOR006C	0.283608512273467	0.0137689911872796
P34232	MTR2	YKL186C	0.51170763246412	0.013779013681529
P40477	NUP159	YIL115C	-0.180309381368794	0.013789537168521
Q12074	SPE3	YPR069C	0.179168556694194	0.0138137354227018
P53224	ORM1	YGR038W	-0.267112133132734	0.0138918852645223
P40015	ISC1	YER019W	-0.290932322623217	0.0138958796436857
P36516	MRPL3	YMR024W	-0.310519292964873	0.014030700704157
Q12354		YLR118C	0.343538708265481	0.0140488406987059
P19454	CKA2	YOR061W	0.243539080697087	0.0141190939380622
P0CX28;P0CX27	NA	NA	0.530358535655125	0.0141913450599025
P41815	BAP3	YDR046C	-0.28234028813419	0.0198068653580481
Q03702	CCE1	YKL011C	0.342589285713327	0.019860371543575
Q06608		YPR172W	0.314049062241949	0.014373952073515
P39952	OXA1	YER154W	-0.36570989127129	0.0143751983705771
Q06679	UTP4	YDR324C	-0.230167875851617	0.0144338082859996
P53172	SDS23	YGL056C	-0.196647663831971	0.0144505553321896
P39935	TIF4631	YGR162W	-0.222123617250201	0.0144685989089019
P30656	PRE2	YPR103W	0.245396576283603	0.0144988602919096
P23060	MAK32	YCR019W	0.956548836827324	0.037596278829522
P25655	CDC39	YCR093W	-0.198521597197033	0.0145763738206614
Q06451	TPO3	YPR156C	-0.308497050179511	0.0146953182862833
Q04120	TSA2	YDR453C	0.592624120767244	0.0157173867685532
P36523	MRPL15	YLR312W-A	-0.231920195689689	0.0147200544340746
P39714	BDH1	YAL060W	0.243183313839051	0.014730592330866
P41811	SEC27	YGL137W	0.17780976986781	0.0147696350126495
Q04226	TAF11	YML015C	0.278418122960147	0.014803826569298
P36104	SWD2	YKL018W	0.205242135446774	0.0148978947326053
P35195	ECM15	YBL001C	0.363617561210525	0.0149552883324685
P53297	PBP1	YGR178C	-0.196950307033678	0.0149608273137558
P53218	POP6	YGR030C	0.375460180169867	0.0149864187304484
P50111	ZDS1	YMR273C	-0.299627077880714	0.0149923780096995
P89105	CTR9	YOL145C	-0.181016439731621	0.0150729514958799
P22517	CMK2	YOL016C	0.326595926217877	0.015125505063223
P53599	SSK2	YNR031C	-0.274054346539618	0.0151498401598353
P14681	KSS1	YGR040W	-0.238166711308082	0.0151665898497511
P39926	SSO2	YMR183C	-0.319068156114383	0.0151732053670255
P47057	SNX4	YJL036W	0.170568972176024	0.0151969959018132
P39016	MPT5	YGL178W	0.332254661497924	0.0269438729229051
P42826	XKS1	YGR194C	0.248094102591626	0.0152840919946153
P32505	NAB2	YGL122C	-0.224277262238239	0.0154074720027644
P53063	RAI1	YGL246C	0.227675131605409	0.0154149522828871
P19262	KGD2	YDR148C	0.221562681916318	0.0154179468783174
P40106	GPP2	YER062C	0.421072632898522	0.0154947668042081
P47143	ADO1	YJR105W	0.193007355136402	0.0155003524987615
P53323	BUD32	YGR262C	-0.391043665829685	0.0155182704438565
P38143	GPX2	YBR244W	-0.225643542149403	0.0155319509049661
P14180	CHS2	YBR038W	-0.279695869821502	0.0215166945045215
Q03306	PKH3	YDR466W	0.417542421287745	0.0157850011391644
Q12363	WTM1	YOR230W	0.221752167379055	0.015785726547894
P40022		YER034W	0.278948810954837	0.0158041233997004
P36047	SDS22	YKL193C	0.221673771881317	0.0158161262828798
P16661	ALG1	YBR110W	0.260208444086622	0.0158914938631648
P36531	MRPL36	YBR122C	0.410062712730905	0.0159231027316777
Q06409	DCK1	YLR422W	-0.469886732712624	0.0199667704736974
P21827	SRM1	YGL097W	-0.173362278854764	0.0160751147858528
Q02204	MRPL13	YKR006C	-0.290010282883653	0.0161144033006692
P47116	PTK2	YJR059W	0.222756617275973	0.0161530776117783
P21304	PWP1	YLR196W	-0.181582682456725	0.0161567853892234
P34758	SCD5	YOR329C	0.531210415913929	0.0185824203518526
Q08581	SLK19	YOR195W	-0.174787165534095	0.0162324560755999
P25298	RNA14	YMR061W	-0.19087039425288	0.0163113955737402
P40016	RPN3	YER021W	-0.142737079893816	0.0163779384835949
P32600	TOR2	YKL203C	-0.32445231645363	0.0164122343729209
Q06336	GGA1	YDR358W	0.27393348872198	0.0165844341290512
Q06344	ESF1	YDR365C	0.238334575912774	0.0166674971618343
Q03153	ATP25	YMR098C	-0.340048467069259	0.0209249509239919
P12383	PDR1	YGL013C	0.2333319120958	0.0169161442718409
Q10740	LAP2	YNL045W	0.182548864334453	0.0169337462810783
P48412	UPF3	YGR072W	0.40356217199308	0.0171481651616461
P05374	CHO2	YGR157W	-0.152714823665551	0.017270526722787
P40693	RLP7	YNL002C	-0.153204835297814	0.0173114298442128
P13185	KIN1	YDR122W	0.186285703211606	0.017350391032748
P39744	NOC2	YOR206W	-0.233652395748056	0.0173524552651265
P26783	RPS5	YJR123W	0.176663448258232	0.0175398652902419
P49954	NIT3	YLR351C	0.206820986920615	0.0177180172121406
P38714	MSR1	YHR091C	-0.310737987637872	0.030230581237621
Q03653	EFR3	YMR212C	0.205439326646829	0.0177760646431171
P18409	MDM10	YAL010C	0.356772855145593	0.0188961552082444
P04806	HXK1	YFR053C	0.218618813108726	0.017916816205607
P38747	OTU2	YHL013C	-0.25429993446312	0.0179390437033463
P47037	SMC3	YJL074C	-0.255726580540706	0.0180213968991828
P43573	BUD27	YFL023W	-0.176726103969678	0.0184304262040507
Q02753	RPL21A	YBR191W	0.760816213648113	0.0184313468913886
Q06835	RDS3	YPR094W	-0.483410707114093	0.0227447941794751
P41819	DIM1	YPL266W	-0.22381198620274	0.0185623551256742
P05373	HEM2	YGL040C	0.23428761331845	0.0185828209321209
P32336	NUD1	YOR373W	-0.437533196134879	0.0186331505625706
P40005	GIM4	YEL003W	-0.41021874703414	0.0187739434728402
Q12403	ERP3	YDL018C	0.394366425718175	0.0187898029953968
P43616	DUG1	YFR044C	0.152102440841801	0.0188933139455387
P32337	PSE1	YMR308C	-0.221739356538741	0.0189837864516891
Q99257	MEX67	YPL169C	0.193077052065856	0.0191101160312294
P14020	DPM1	YPR183W	-0.21260274698724	0.019170885536625
P40340	YTA7	YGR270W	-0.150924493576191	0.019275257156667
P38758	TDA3	YHR009C	0.162499490152886	0.0193022496113564
P32656	GCG1	YER163C	0.310811306134067	0.0193432382034749
P25638	TAH1	YCR060W	-0.522820823532317	0.0193775626693436
P53141	MLC1	YGL106W	-0.159672663076257	0.0194155895561976
O13585		YPR089W	-0.222045086542479	0.0194189293816841
P53628	SNF12	YNR023W	0.242483620086542	0.0194237838460466
Q03430	RSM28	YDR494W	0.222993124976128	0.0194571359884559
Q86ZR7		YKL033W-A	-0.169956866280476	0.0194603208843663
Q8J0M4		YCL012C	-0.305596275617244	0.019463082972545
P38795	QNS1	YHR074W	0.174234574131955	0.0195884297096497
P14904	APE1	YKL103C	0.179587047371697	0.0195997446322082
P16892	FUS3	YBL016W	0.370477003260575	0.0196543344676836
P05750	RPS3	YNL178W	0.176141262697485	0.0196831366622585
P38175	MRP21	YBL090W	0.247613548960707	0.0197790189430753
Q12276	HER1	YOR227W	0.459939514092696	0.0198032065485165
Q08562	ULS1	YOR191W	0.384764790258252	0.0210150525730907
P37297	STT4	YLR305C	-0.291001387622146	0.0199084761878326
Q04175	SXM1	YDR395W	-0.179339754472434	0.0199365915793322
P25368	RRP7	YCL031C	-0.24469353656891	0.0199824930454013
Q07395	SYO1	YDL063C	-0.263230808862627	0.0200805840973215
P39105	PLB1	YMR008C	-0.24253099342171	0.0201510798701555
P15731	UBC4	YBR082C	0.426294596529448	0.0201691952075125
Q03661	ESC1	YMR219W	0.191736341406031	0.0201722900251653
P53188	CGR1	YGL029W	0.321853829728738	0.0227930071245793
P23337	GSY1	YFR015C	-0.182514833881211	0.0227954802404939
P00330	ADH1	YOL086C	0.227486950379031	0.0202094356870242
P38523	MGE1	YOR232W	-0.209661472699615	0.0204265797163924
P32939	YPT7	YML001W	0.249029732513442	0.0204635072680438
Q04409	EMI2	YDR516C	0.195444935667329	0.0204678232181608
P43586	LOC1	YFR001W	-0.214196409372402	0.0206005419945538
P38295	EHT1	YBR177C	0.266201332243735	0.0206116300371597
P38817	GGA2	YHR108W	-0.145113296980611	0.0207197512292954
Q02908	ELP3	YPL086C	-0.165053843890018	0.0207407707501395
P36105	RPL14A	YKL006W	-0.621234952242091	0.0208538263532685
P36145	TFA2	YKR062W	-0.199271129704758	0.0208593848229551
Q12205	MNL2	YLR057W	0.364069076942155	0.0208979033630802
P04051	RPO31	YOR116C	-0.150771148819697	0.0209439298222504
Q03835	GRX3	YDR098C	-0.256249937860108	0.0209682807507736
Q02630	NUP116	YMR047C	-0.215594630516776	0.0210376270940849
P47127	AIM24	YJR080C	-0.203025073889449	0.0210421123085138
Q04067	TIF35	YDR429C	-0.237275390081951	0.0211075790205161
P53171	GEP7	YGL057C	-0.349385117059693	0.025598770899098
P0CX48;P0CX47	NA	NA	0.225625763994536	0.0212958856515921
P38821	APE4	YHR113W	0.245815782475532	0.0213282884582059
P39113	CAT8	YMR280C	-0.190440953341774	0.0281754985833091
P50896	PSP1	YDR505C	-0.2023122466214	0.0215579613864471
Q07824	TPO1	YLL028W	-0.436162865951538	0.0230249503536339
P11353	HEM13	YDR044W	-0.233654058413297	0.0218091404414431
P38759	VPS29	YHR012W	0.353765929331043	0.0218501026069484
P53759	DUS1	YML080W	-0.563992025582539	0.0218659175057132
Q06205	FPR4	YLR449W	-0.238369909924597	0.0219400615712457
P07991	CAR2	YLR438W	0.361799771799603	0.0221002034403426
P80428	ARP4	YJL081C	0.191511533378574	0.0222676756106072
P02557	TUB2	YFL037W	0.208044087949805	0.0223403921096913
P21771	MRPS28	YDR337W	0.199542705821237	0.0225168175071366
P40035	PIC2	YER053C	0.43051846862971	0.0253088063041817
P53206		YGR012W	0.178884803631959	0.0227416016904414
P39002	FAA3	YIL009W	-0.266968212090074	0.0227833572531237
P00724	SUC2	YIL162W	-0.354389396089211	0.0229269383288862
Q12450	ERP4	YOR016C	-0.361570182174091	0.0229567754940491
P38217	KAP104	YBR017C	-0.208232569291081	0.0229797108532675
P38989	SMC2	YFR031C	-0.352305671290871	0.022987608887277
Q12328	TIM22	YDL217C	0.282285703544868	0.0277196091945839
Q12522	TIF6	YPR016C	-0.221526276812757	0.0231623198270912
P38771	RRF1	YHR038W	-0.205731662839007	0.0232339461275014
P20447	DBP3	YGL078C	-0.192782403837899	0.0232514696750457
P32352	ERG2	YMR202W	-0.266065989513578	0.0233694215341532
Q12004	TFB4	YPR056W	-0.245365020738056	0.0233709670269895
Q04182	PDR15	YDR406W	-0.597920027017295	0.0334655466115337
P43122	QRI7	YDL104C	-0.410075126482763	0.0305822295012891
P53111	ARI1	YGL157W	0.500981225317179	0.0248892249231842
P33749	MSN4	YKL062W	0.499167243012934	0.0236225368788199
P38122	ECM31	YBR176W	0.318270788704769	0.0237819767685647
P47190	PMT3	YOR321W	0.289846210271044	0.0238398765432424
P40506	CAB2	YIL083C	-0.163908036737418	0.0239907445409018
P08678	CYR1	YJL005W	0.258519709004045	0.0240498689098761
P38321		YBR225W	-0.327783104391667	0.0243298858385282
P20433	RPB4	YJL140W	-0.196562736459626	0.0244162730388016
P18963	IRA1	YBR140C	-0.456394307499785	0.024568802113626
P15424	MSS116	YDR194C	-0.144527822242733	0.0249034682663987
P10080	SBP1	YHL034C	0.173978813885959	0.0249711764420523
P01120	RAS2	YNL098C	0.234387110635097	0.0251645495190593
Q06488	RSC2	YLR357W	-0.161072549699981	0.0251727000942361
P23493	MBR1	YKL093W	0.471188200888307	0.0325245948400983
Q07915	RLP24	YLR009W	-0.300367504325052	0.0253948658449272
P53326		YGR266W	0.212935678119933	0.0254631439416912
P36056	RSM22	YKL155C	0.37516076810665	0.028674768901315
Q02884	ELP4	YPL101W	-0.232229190288635	0.025778933579255
P08524	ERG20	YJL167W	-0.152795309941411	0.0258483394178514
Q08446	SGT1	YOR057W	0.135082007864607	0.0260369458721705
P32909	SMY2	YBR172C	-0.161593929473689	0.0261255019995972
P32783	ABD1	YBR236C	0.219801942490474	0.026133247763939
P53220	TIM21	YGR033C	0.284126801121843	0.026381553409901
P46995	SET2	YJL168C	0.243176626723002	0.0265134637063778
P38620	PRS2	YER099C	0.282379298045047	0.0265499187770494
P13586	PMR1	YGL167C	-0.19945134896447	0.0266232238550781
P53900	GIM3	YNL153C	-0.17069425520474	0.0266334084795499
P53192	GET1	YGL020C	0.23166272590495	0.0266350459387197
P08004	CHS1	YNL192W	0.200331909791426	0.0266815257091632
P32316	ACH1	YBL015W	0.278217213923735	0.0266954841815864
P29465	CHS3	YBR023C	-0.189161470017162	0.0266992076497756
Q3E754	RPS21B	YJL136C	-0.154500306854196	0.0267797774347816
P47089	TMA22	YJR014W	0.168506177822703	0.0269974215496213
P38875	GPI16	YHR188C	0.159805871143845	0.0271164305517517
P38806	YNG2	YHR090C	0.43200309669103	0.0273017182356275
Q12339	UTP23	YOR004W	0.220784141239626	0.0273952744923394
P42841	PFS2	YNL317W	0.273110437650359	0.0274556178720186
P36084	MUD2	YKL074C	0.296416594193005	0.0349117507928167
P40453	UBP7	YIL156W	-0.558934729002942	0.0275129415885274
P32774	TOA2	YKL058W	-0.304107832056083	0.0277750418649217
P38264	PHO88	YBR106W	-0.162159465571357	0.0277840886134456
P53008	CWH41	YGL027C	-0.147814072119616	0.027900053423753
Q05029	BCH1	YMR237W	-0.176612902576558	0.0279092832469888
P06169	PDC1	YLR044C	0.182796144813317	0.0279249353071939
Q12314	SFM1	YOR021C	0.157380348135916	0.0281001935095672
Q06494		YPR127W	0.262328500516528	0.0281830606759107
P53261	NOP7	YGR103W	-0.200179309119829	0.028271194715485
Q04430	CAB1	YDR531W	0.313193869193938	0.0283272344730269
P37020	GEF1	YJR040W	0.320604925785215	0.0284111473156262
P29340	PEX4	YGR133W	0.429032685754386	0.0335642913989453
P34247	UTP11	YKL099C	-0.246674830990635	0.0286142314730879
P17629	HPR1	YDR138W	0.225215395889066	0.0287486702270013
P33307	CSE1	YGL238W	0.215525867912852	0.0287800996589857
P47079	CCT8	YJL008C	-0.142448939791617	0.0290444196611109
P32899	IMP3	YHR148W	-0.205509351795222	0.0291853925522723
P40856	SAP185	YJL098W	-0.263329543873539	0.0295683948287021
P39076	CCT2	YIL142W	-0.138630438895881	0.0296582479403769
Q04991		YMR221C	-0.297997116477699	0.0448336165890827
Q03533	TDA1	YMR291W	0.283247278611281	0.0296816654074655
P53865	CNM67	YNL225C	0.206168457444345	0.0297962571116063
Q3E7Y3;P0C0W1	NA	NA	-0.235490647625092	0.0298241382983437
P0CX26;P0CX25	NA	NA	-0.207102330169398	0.0299611524986648
P52593	NUP188	YML103C	0.175847413653756	0.0300068838715413
P38084	BAP2	YBR068C	-0.238932017121449	0.0300695688848486
Q12305	RDL1	YOR285W	0.190060916871218	0.0300725702982629
P10961	HSF1	YGL073W	0.230038075501046	0.0300907892857053
Q12125	GET4	YOR164C	0.158969092623252	0.0301249773952962
P32474	EUG1	YDR518W	0.263552446916837	0.0302715397329832
P53600	RET3	YPL010W	-0.175908901165972	0.0305070386182631
P50101	UBP15	YMR304W	0.193323323128897	0.0305326037544482
P46964	OST2	YOR103C	-0.486389040956581	0.0383478953228159
P07806	VAS1	YGR094W	-0.120591490846174	0.0306888553791944
P11075	SEC7	YDR170C	-0.137591313607125	0.0307741771893368
P40486	SHQ1	YIL104C	-0.200217725151848	0.0308681209577563
Q04922	MFB1	YDR219C	0.404574932410281	0.034048235822737
P06774	HAP2	YGL237C	0.382158073568586	0.0311587916123815
P46982	MNN5	YJL186W	0.214337391122644	0.0311928846495603
Q00246	RHO4	YKR055W	0.275808359092242	0.0312275346611238
Q12025		YDR056C	-0.395718081801125	0.0313049645228053
P33302	PDR5	YOR153W	-0.245534380476119	0.0313945510283277
P50105	TAF4	YMR005W	0.169456467455543	0.031494645011549
P05319	RPP2A	YOL039W	0.296947114174444	0.0315041132741279
P15700	URA6	YKL024C	-0.156573141933425	0.0319700712849877
Q03559		YMR295C	0.280158648711772	0.0320830308215852
Q08622	GEP3	YOR205C	-0.422633625754614	0.075564144184076
P48164	RPS7B	YNL096C	0.161874354358233	0.0324715269662405
Q12091	DAP1	YPL170W	0.184869727584346	0.0328503646550726
P32341	VPH2	YKL119C	-0.27777661465381	0.0329691715108679
Q02889	MGR2	YPL098C	-0.241435587769313	0.0330685391626813
A5Z2X5		YPR010C-A	0.57360793111615	0.0330823236181522
Q03660	TRS130	YMR218C	-0.33945212479113	0.0330966612556373
P21375	OSM1	YJR051W	0.162832433961814	0.0332427285321669
P32333	MOT1	YPL082C	-0.134465517661358	0.0332599513811428
Q08641	ABP140	YOR239W	-0.165150448636371	0.0333675243700852
P32578	SIP1	YDR422C	-0.380802049759229	0.0334280086911112
Q08967	FLC1	YPL221W	-0.244098022067462	0.0334319888356531
Q99186	APM4	YOL062C	0.276894067387211	0.0334847085187577
P36130	CAF4	YKR036C	0.291583499258461	0.0417099960993368
P25559	DCC1	YCL016C	-0.305608620192537	0.0336938759531595
P25270	MRM1	YOR201C	0.398142852623323	0.0338681173723343
P00899	TRP2	YER090W	0.141432434306626	0.0339327314701987
Q04341	MIX14	YDR031W	0.418460986203499	0.0340027979443226
P21243	SCL1	YGL011C	0.135966558866478	0.0341111800607129
P33306	BCK2	YER167W	-0.513167809096142	0.0560572544928705
P05739	RPL6B	YLR448W	0.1415304734263	0.0342549677337753
P32611	RML2	YEL050C	-0.443321358085772	0.0347753283019436
P54783	ALO1	YML086C	-0.136091837020508	0.0350256475647938
Q3E795		YLR361C-A	-0.427161277322664	0.0350263706425979
P15274	AMD1	YML035C	0.16111651677118	0.0351041468409467
P38067	UGA2	YBR006W	0.318081031805807	0.0354165018722416
P53044	UFD1	YGR048W	-0.166080302964488	0.0354953218835283
Q03782	SNU56	YDR240C	-0.288074968191811	0.0356182808115601
P14126	RPL3	YOR063W	0.153050599072863	0.0359692187653411
P48360	ARH1	YDR376W	0.224948089954651	0.0360176918643551
P19955	YMR31	YFR049W	0.339970265092383	0.0360876464142738
P32835	GSP1	YLR293C	0.214431282641762	0.0362625649376363
P40096	BUR6	YER159C	-0.316736376649406	0.0363263908509387
P42941	SER2	YGR208W	-0.273835179965268	0.0363396530754859
Q06090	MRPL51	YPR100W	0.451500187570137	0.0363892762510791
P0CX38;P0CX37	NA	NA	0.157334659839435	0.0364850560013694
P27351	APL1	YJR005W	-0.232058082920467	0.0364997289531295
P28495	CAP1	YKL007W	0.321436387316766	0.0365795150040188
Q07979	RSC58	YLR033W	0.171284704132955	0.0365926085931202
P33755	NPL4	YBR170C	-0.147845922356243	0.036742012585411
P14065	GCY1	YOR120W	0.195569337299908	0.0369867800471896
P38202		YBL028C	-0.341651029563874	0.0370294545139824
P16474	KAR2	YJL034W	-0.136018772855699	0.0370333333233557
P40341	YTA12	YMR089C	-0.172587494706608	0.0372534867563545
P06208	LEU4	YNL104C	-0.130622126021294	0.0373185534208893
P13712	MSI1	YBR195C	0.345816110560524	0.0373352525075163
P39525	CEM1	YER061C	0.368119824259178	0.0373873792189626
P33314	BUD2	YKL092C	-0.36281442956237	0.0374851986141873
P35724	MNR2	YKL064W	-0.432398855035984	0.0408705492864483
P28241	IDH2	YOR136W	0.205668348404835	0.0376055541843179
P02294;P02293	NA	NA	-0.332351827918558	0.0378811780464172
P23724	PRE7	YBL041W	0.257122355927347	0.0382538718154422
Q05515	SVF1	YDR346C	-0.149675713271858	0.0384279131254545
Q07381	TSR1	YDL060W	-0.192510549675649	0.0385594437185902
P22149	AFT1	YGL071W	-0.494040396504431	0.0387335004949181
P32904	MRPL6	YHR147C	-0.274091278331031	0.0390283554797871
P43567	AGX1	YFL030W	0.233010404448425	0.0475188540379609
P40051	ICP55	YER078C	-0.276558834349739	0.0391890890588366
P39515	TIM17	YJL143W	-0.368531653508697	0.0392479075024187
P25044	PTP1	YDL230W	0.242406616307882	0.0392879564687056
Q03750	TAF8	YML114C	-0.402661206696166	0.0430878199394214
P53839	GOR1	YNL274C	0.308469724410752	0.0397943959671413
P18962	DAP2	YHR028C	0.193577420241969	0.0398169497721082
P15703	BGL2	YGR282C	0.192803189147973	0.0398604309012469
Q12337;P0CX64;P0CX63;P25384;P0C2J3	NA	NA	-0.351319542907344	0.0398613104343876
P09232	PRB1	YEL060C	-0.212936630975662	0.0399322058933913
Q12482	AGC1	YPR021C	0.369421122626527	0.0456527865237397
Q03201	RSM10	YDR041W	0.251054577929139	0.0399689486981006
P32833	ORC2	YBR060C	-0.664620461969349	0.0458429865874297
P40064	NUP157	YER105C	-0.124352159058784	0.0401911422272083
P37298	SDH4	YDR178W	0.368467498601166	0.0488267516599944
P27637	BUD14	YAR014C	-0.242688002282172	0.0404664036671284
Q08229	NBA1	YOL070C	0.234211446316614	0.0405821521088065
P39676	YHB1	YGR234W	-0.179157601990802	0.0406321086250305
Q12200	NCR1	YPL006W	-0.19815517075061	0.040830029889714
P43585	VTC2	YFL004W	-0.170007967441389	0.0408349168176856
P36106	BYE1	YKL005C	0.448372808658497	0.0409267528247681
P22135	ATP12	YJL180C	0.197940737982758	0.04093405902865
P23643	VPS3	YDR495C	-0.516646186655723	0.0410017477097697
Q03419	IZH1	YDR492W	-0.275818508624788	0.0496013861030168
P46677	TAF1	YGR274C	-0.354629830115964	0.0410326939296482
P47164	STR2	YJR130C	-0.40054987954294	0.0427725056303524
P47118	YAE1	YJR067C	0.31753102474498	0.0411913664454043
P12688	YPK1	YKL126W	-0.191134218485747	0.0416905874797425
P22803	TRX2	YGR209C	0.167084910942812	0.0417792708970408
P38306		YBR197C	0.328725195707214	0.041882066496395
P24384	PRP22	YER013W	0.305328211457905	0.0420022426572029
P39732	GIP4	YAL031C	-0.398828695799814	0.0436121156947941
P22217	TRX1	YLR043C	0.197779463953907	0.04203494629768
P51862	ROM2	YLR371W	-0.484521565261844	0.0421071927921558
P53739	FPK1	YNR047W	-0.41854672326749	0.0422003374212069
Q05636	RRP45	YDR280W	0.185545926319758	0.0423099365495094
P22108	APA2	YDR530C	-0.26378245937952	0.0423468768425368
P43123	QRI1	YDL103C	0.128514793463257	0.0424419483845581
P53183		YGL039W	-0.321818922466775	0.0431207989296838
P41734	IAH1	YOR126C	-0.218910153391757	0.0433371967266099
P38694	MSC7	YHR039C	-0.155768110700969	0.0434624030348998
P32802	EMP70	YLR083C	0.296623389624838	0.043530719130563
P10964	RPA190	YOR341W	-0.123246294582472	0.0435393908531784
P53120		YGL140C	-0.269889282471908	0.0436255581547719
P36161	NUP133	YKR082W	0.136362515081757	0.0439468846372927
P36528	MRPL17	YNL252C	-0.218854805596983	0.0440387693430377
P40318	SSM4	YIL030C	-0.16607678972127	0.0442622162284135
P00360	TDH1	YJL052W	0.545541821235457	0.04430814091245
Q03792	RIM13	YMR154C	-0.452735116502335	0.114031563544797
P22141	PRE1	YER012W	0.292789164477078	0.0446002865355928
P53953	SFB2	YNL049C	-0.211552988694361	0.0450213705579472
Q12133	SPC3	YLR066W	-0.243271122368256	0.0455301933987681
P01098	STF1	YDL130W-A	0.412951646264727	0.0456896251713346
P47771	ALD2	YMR170C	0.268051595893539	0.0456937540784858
P33891	TIP20	YGL145W	0.194147650478651	0.0459421080696992
P36069	PMU1	YKL128C	0.27566457823535	0.045949893799986
P80967	TOM5	YPR133W-A	-0.177929813545909	0.0462577968939959
Q07807	PUF3	YLL013C	-0.120440084880183	0.0463013969167845
P05694	MET6	YER091C	0.132974979363087	0.0463260191549416
P07703	RPC40	YPR110C	0.171498163263692	0.0464555456615765
P37302	APE3	YBR286W	0.159544016180149	0.0465823134538597
P48362	HGH1	YGR187C	-0.236522526901418	0.0466128847474991
P53051	IMA1	YGR287C	0.530030121991018	0.0593517634553806
P81451	ATP19	YOL077W-A	0.37198922435639	0.0467723039950239
P24784	DBP1	YPL119C	-0.290701771281263	0.0528470130309725
Q03656	SKY1	YMR216C	-0.141890741810904	0.0469105394158403
Q03677	ADI1	YMR009W	-0.226770816196204	0.046920505656424
P50090	KEL2	YGR238C	-0.355530497266464	0.0645351126624469
P25359	RRP43	YCR035C	0.186842283710607	0.0473578023263974
Q12082		YDL157C	-0.524334136937807	0.0563522744194247
P09959	SWI6	YLR182W	0.176359475596961	0.0473915553869689
P46654	RPS0B	YLR048W	0.171486183106154	0.0474183473158404
P32860	NFU1	YKL040C	-0.198654083254159	0.0474445907401268
P36064	CMC1	YKL137W	-0.240787832692799	0.0477137830659323
P01119	RAS1	YOR101W	-0.241632670524204	0.0478357343279484
P19881	PHO13	YDL236W	0.137259535705248	0.0478895203515816
P54070	KTR6	YPL053C	-0.182183145920884	0.047985785073193
P38426	TPS3	YMR261C	0.141873289900172	0.0481066169672276
P53913	FYV6	YNL133C	0.20828306128794	0.0518182471299769
P40558	CFD1	YIL003W	0.202124781191255	0.0481665692050352
Q12329	HSP42	YDR171W	0.266773693932347	0.0481985295599336
Q12000	TMA46	YOR091W	-0.186285876681879	0.0482185880750676
Q05787	HRD3	YLR207W	-0.240508697054789	0.0482187870934812
P21374	ISY1	YJR050W	0.347129665380127	0.0520016026685597
Q12447	PAA1	YDR071C	0.137422552410673	0.0484776026326203
Q07541		YDL121C	-0.463395826537823	0.0489646803225486
P04050	RPO21	YDL140C	0.107746743655031	0.0490331439299646
P32317	AFG1	YEL052W	-0.170859462110187	0.049085381415778
Q12743	DFM1	YDR411C	-0.396302442829228	0.0491268822831364
P12868	PEP5	YMR231W	-0.213102755879348	0.0497656616451863
P38011	ASC1	YMR116C	0.157179555536175	0.0498370265294667
P36156	ECM4	YKR076W	0.363959991999689	0.0536409082394953
P25040	TSR4	YOL022C	0.192066765249507	0.0499679991002914
Q04599	MRPL1	YDR116C	-0.207097797084138	0.0500180133075801
Q00772	SLT2	YHR030C	0.282933592983063	0.0501231866556568
P38615	RIM11	YMR139W	-0.255165557104455	0.0501380516344731
O13525	COQ4	YDR204W	0.265339345337761	0.050207495442637
Q08193	GAS5	YOL030W	-0.191721908812614	0.050309252337433
P34167	TIF3	YPR163C	0.120574854827382	0.0503354122197593
P34756	FAB1	YFR019W	0.258156978654124	0.0522220935008065
P13188	GLN4	YOR168W	-0.112663888469289	0.0505294679337074
P00127	QCR6	YFR033C	0.344841160257324	0.0509173844134173
P39995	EAF5	YEL018W	-0.475997242309365	0.0571427425641025
Q06410	ATG17	YLR423C	-0.281702244243053	0.0571755908507095
P40312	CYB5	YNL111C	0.462916590953782	0.0510152984454806
P21524	RNR1	YER070W	-0.156445488949924	0.0511700529545094
Q04213	IOC4	YMR044W	-0.517268089591852	0.0549381252628028
P40961	PHB1	YGR132C	0.228417618626953	0.0512090128042497
P24280	SEC14	YMR079W	-0.151229923634112	0.0512979763958444
P38710	INM1	YHR046C	0.197014628161867	0.0513384767150713
P21957	OPI1	YHL020C	-0.22332715879325	0.0514867879984857
P32601	DSS4	YPR017C	-0.233574231357192	0.0532431358076658
P32905	RPS0A	YGR214W	0.337650223515624	0.0515467025505963
P38166	SFT2	YBL102W	-0.273728919311388	0.0534760543508329
P49334	TOM22	YNL131W	-0.183476847723473	0.0520056360986327
Q00776	APM1	YPL259C	-0.326104523062234	0.0520522793236524
Q12241	VAM3	YOR106W	-0.370416491137277	0.0522369558524376
P53940	APJ1	YNL077W	0.287551788811864	0.0522891933797187
P40343	VPS27	YNR006W	-0.157773260793356	0.0526645183804249
P40165		YNL200C	0.227642203092167	0.0527501601483762
P53981		YNL010W	0.107564026989007	0.0527522303120786
P32048	MSK1	YNL073W	0.284397647956823	0.0590280725696711
P47122	NPA3	YJR072C	-0.161851693201566	0.0529741235024429
P47047	MTR4	YJL050W	-0.125177244371823	0.0529930712175523
Q05779	COQ9	YLR201C	0.195001053703649	0.0532613871097506
P53070	MTO1	YGL236C	-0.270615086012796	0.0551006658185591
Q08970	MMT2	YPL224C	-0.346027788007301	0.0716748540088334
P35181	APS1	YLR170C	0.205026484719781	0.0537626585572574
Q12434	RDI1	YDL135C	0.259756742846587	0.0541232190619214
P47912	FAA4	YMR246W	-0.12938573203019	0.054205562512363
P39722	GEM1	YAL048C	0.160193828452705	0.0580829560034493
Q12298		YDR061W	0.164151025270243	0.0543007641077512
P38071	ETR1	YBR026C	0.145152129511771	0.0543107658844367
P38820	UBA4	YHR111W	-0.126194289306095	0.0544232990726522
Q12331		YDR262W	-0.252054646216816	0.0547448200871448
P38814	SBE22	YHR103W	-0.153146705402108	0.0549708130733594
P25654		YCR090C	-0.218632857659554	0.0549871871688568
Q07458	RXT3	YDL076C	0.404626986654979	0.0552256821321702
P26725	YUR1	YJL139C	-0.509615586137052	0.0801968766797105
P00175	CYB2	YML054C	-0.302460004879435	0.0647858669793866
P36010	YNK1	YKL067W	0.187709217465674	0.0554625229226993
P25389	KCC4	YCL024W	0.292800952664898	0.0554852492749301
Q03780		YDR239C	-0.405845048266396	0.0573829229540412
P25443	RPS2	YGL123W	0.122011114271736	0.0557742662323138
P02400	RPP2B	YDR382W	0.192176808988791	0.0559219942035385
P40459	PAN6	YIL145C	0.198451820390908	0.0561121271702408
P00359	TDH3	YGR192C	0.147302395664759	0.0563867046904379
P40160	RIO2	YNL207W	-0.170757219892124	0.0565719414239995
P48582	BRO1	YPL084W	0.138776606468252	0.0566644511424143
P18562	FUR1	YHR128W	-0.118865977630819	0.0567914853681073
P36054	RCN1	YKL159C	-0.278665577648415	0.0633780295360862
Q06538	CSC1	YLR241W	0.346626092322627	0.0574676502908165
P38985	SRP14	YDL092W	0.196557202059093	0.0575865479047517
P32461	DPH2	YKL191W	0.186241234393314	0.0575893644645494
P32618		YEL043W	-0.267112729437507	0.0576182399786888
Q01852	TIM44	YIL022W	-0.147681806194626	0.0576648073700224
Q03280	TOM1	YDR457W	-0.113885885772447	0.0577834616448465
Q03862	ARX1	YDR101C	-0.133457908093128	0.0581170211340963
Q04228	UBX2	YML013W	0.18790453593596	0.0581434955818756
P49435	APT1	YML022W	0.20738635884182	0.0581648288679118
P35718	RPC25	YKL144C	-0.196383975940261	0.059939122272719
Q08817	SOG2	YOR353C	-0.213407495836474	0.0581948425330954
Q04673	SSL1	YLR005W	0.183503380802549	0.0583544001331707
Q08959	PGC1	YPL206C	0.216365364999163	0.0587226585939869
P40078	NSA2	YER126C	0.1509193256515	0.0591456220799281
P36076	CAB3	YKL088W	0.220652643786707	0.0592550483217551
Q08273	HRT1	YOL133W	-0.233801944037552	0.0592947332342133
P28321	YJU3	YKL094W	0.140445115845246	0.0593529583678441
P38174	MAP2	YBL091C	-0.164266170908842	0.0594514354864229
P38247	SLM4	YBR077C	0.194290210872921	0.0595657897942371
Q06010	STE23	YLR389C	0.119882598061082	0.0597993882658162
P07250	ARG82	YDR173C	0.321195891654341	0.0662944784507809
P20449	DBP5	YOR046C	0.151768944791801	0.0601513728214868
P40159		YNL208W	-0.228942475211667	0.0602627176528975
Q12452	ERG27	YLR100W	0.173953531087154	0.0610193959301601
P22213	SLY1	YDR189W	0.182247072093805	0.0613171833893473
P47135	JSN1	YJR091C	0.157198021973535	0.0614829171107814
P34226	SKT5	YBL061C	-0.155683982444327	0.0617459450742819
Q12178	FCY1	YPR062W	0.223881710526062	0.0618690128563126
P34219	TOD6	YBL054W	0.698154806458692	0.0619826173807894
P38986	ASP1	YDR321W	0.176451555984393	0.0620049891206106
P33308	CSE2	YNR010W	-0.271748678243537	0.0621319967428858
Q04371		YMR027W	-0.112888742745302	0.0621392451280992
Q04500	UTP14	YML093W	-0.170825317539084	0.0621657289928668
P53971	FAP1	YNL023C	-0.252885803018735	0.0622164814924016
P06106	MET17	YLR303W	-0.192842187240707	0.0623238792158748
P46984	GON7	YJL184W	0.144015672360339	0.0623422956427584
P46367	ALD4	YOR374W	0.204381899123035	0.0624107685434843
P25373	GRX1	YCL035C	0.168831786312978	0.06243797606706
P46674	SAC3	YDR159W	-0.315076526617236	0.0625001123804842
P40069	KAP123	YER110C	-0.133472532363665	0.0625723893688379
P37838	NOP4	YPL043W	0.1566805650132	0.0625961602989086
P36037	DOA1	YKL213C	-0.152256705737891	0.062820467082823
P40010	NUG1	YER006W	-0.13491695946875	0.063040653201231
Q02555	RNT1	YMR239C	-0.220264673706914	0.0634360388810429
Q03407	PKH1	YDR490C	0.2188575460663	0.0635024703066752
P36046	MIA40	YKL195W	-0.250064173243974	0.0635230219429835
P39731	MTW1	YAL034W-A	0.203167469344457	0.0635853238844411
P53729		YNR029C	0.194534163547097	0.0636016275613967
P41814	GCD10	YNL062C	0.151492247825878	0.0638778789716771
P39104	PIK1	YNL267W	-0.172236271917885	0.0638846429973914
Q99395		YPL229W	0.50885235599586	0.0827859291616553
P33419	SPC29	YPL124W	-0.239248071966948	0.0679310976730851
P43588	RPN11	YFR004W	0.150291884785503	0.0644484153535366
P39998	EDC3	YEL015W	0.182628745528547	0.0645191575053623
P34072	MKS1	YNL076W	0.285539995680221	0.0645736605264571
P00401	COX1	Q0045	-0.39266306920641	0.0667731444113418
P23833	SCO1	YBR037C	-0.277843243410302	0.0651520118857584
P36041	EAP1	YKL204W	0.107737614792661	0.0652847696208654
P38829	CIA2	YHR122W	-0.297567605923888	0.0654077277885788
P38164	SEA4	YBL104C	0.283936865860717	0.0655390369734204
P47120	LIA1	YJR070C	-0.118663745942893	0.0656056898988539
P40080	VFA1	YER128W	0.348192952055172	0.0675703176694794
P32468	CDC12	YHR107C	0.131397175534381	0.0658747215759694
P38778	SMF2	YHR050W	-0.240849737790732	0.0758836514114282
P53617	NRD1	YNL251C	0.136728394582889	0.0661515005865917
P29469	MCM2	YBL023C	-0.130761461686891	0.0663721455226696
Q07528	ATG20	YDL113C	0.285607316856279	0.0664116760904608
P32380	SPC110	YDR356W	-0.210605792469835	0.0666268820687008
P38226	CST26	YBR042C	-0.235706689798821	0.0666774014679231
P07253	CBP6	YBR120C	0.148658420362604	0.0669720920384397
P32178	ARO7	YPR060C	0.153354895798387	0.0674691169716495
P34217	PIN4	YBL051C	-0.121295096152952	0.0674745026885752
P38129	TAF5	YBR198C	-0.113009627099583	0.0674980477397047
P39111	VMA7	YGR020C	0.318464099856019	0.0676182757423419
Q04511	UFO1	YML088W	0.223439973888961	0.0814872557473948
P39719	FLC2	YAL053W	-0.218725241222835	0.0678516567765435
P47095	MDE1	YJR024C	-0.191212398729235	0.0685977172320629
P40018	SMB1	YER029C	0.312591119278817	0.0686163085227569
Q04767	TVP18	YMR071C	-0.254948951682177	0.0686974017865805
P06174	HEM4	YOR278W	0.235754526520335	0.0687944097761001
P53824;P43545	NA	NA	0.195103443874981	0.0787352672134714
Q06408	ARO10	YDR380W	0.146604774338059	0.0690799643185629
Q04847	ROY1	YMR258C	0.287059430817969	0.0690894311737173
P53844	PDR17	YNL264C	-0.166073899251117	0.0691712551949654
P80667	PEX13	YLR191W	-0.214536028273162	0.0711394178211716
P53114	NUT1	YGL151W	-0.152966889415847	0.0694411003522452
P11978	SIR4	YDR227W	-0.213510916294499	0.0694943238088877
P31412	VMA5	YKL080W	-0.127721905102881	0.069620024812437
Q04748	SOV1	YMR066W	0.250552663179391	0.0795236880154563
Q12297	TAF3	YPL011C	0.368220357153245	0.0699570720717984
Q05902	ECM38	YLR299W	0.22931631478313	0.106113172834853
P53836	CAF120	YNL278W	-0.2166687285726	0.0703487332685999
P07284	SES1	YDR023W	-0.127053834926507	0.07040704943687
Q12749	SMC6	YLR383W	-0.196034845223664	0.0772784994892589
Q08745	RPS10A	YOR293W	0.171283433505671	0.0707703328597993
Q05050	EIS1	YMR031C	0.13443629218246	0.0709407116886547
P15646	NOP1	YDL014W	0.122511713155156	0.071104096882455
P33311	MDL2	YPL270W	-0.219666984753079	0.0713722597434933
P40555	NAS2	YIL007C	0.240798419426593	0.0714208950083901
Q6Q546	HUB1	YNR032C-A	0.273289396840593	0.0717618207617823
P53093	YIP4	YGL198W	-0.499252544567469	0.0719251923725489
P38066	RIB1	YBL033C	-0.187821857115043	0.0719887337035525
Q07844	RIX7	YLL034C	0.174874801471198	0.0721759659808302
P38910	HSP10	YOR020C	0.143388604291268	0.0722476360659245
P50264	FMS1	YMR020W	0.413762951410217	0.0742113592539249
Q06214	JIP5	YPR169W	0.206643012587072	0.0724871371001171
P32476	ERG1	YGR175C	0.185288145870196	0.0726010609140297
Q04264	PDS5	YMR076C	-0.12477213040642	0.0727348204147319
P36149	BET3	YKR068C	-0.447102055509539	0.0768163315504833
P14540	FBA1	YKL060C	0.120302469308783	0.0727692201003477
P34222	PTH2	YBL057C	-0.306442584845975	0.0728555093975676
P53950	VAC7	YNL054W	-0.260374968605905	0.0731691574508668
P40523		YIL055C	0.269566207458059	0.0832271746719679
Q04477	SPC24	YMR117C	0.269943255108675	0.0732782585070687
P46675	STU2	YLR045C	-0.188940378054344	0.0733782033828649
P38120	MRPS9	YBR146W	0.233082099203962	0.073779902627761
P38996	NAB3	YPL190C	0.136472887627086	0.0738123451207474
Q12270	RBD2	YPL246C	-0.192255247104899	0.0739964858792939
P35193	ATG19	YOL082W	-0.33976448540491	0.0741569242331646
P53929		YNL108C	0.15465599784504	0.0749467342001333
P39742	SEC72	YLR292C	0.207897958727063	0.0750348432435098
P09938	RNR2	YJL026W	0.158702150610797	0.0752321998056192
Q03772	CWC15	YDR163W	0.176022898139347	0.0754119756781784
Q02196	MET14	YKL001C	-0.446511121894183	0.0795508876056643
Q08220	GSH2	YOL049W	0.137812935352962	0.0755011131593354
P15801	MIP1	YOR330C	-0.290570214414142	0.0777771002635227
P20967	KGD1	YIL125W	0.148065835550128	0.0761785920480253
Q08227	INP54	YOL065C	0.156643536008275	0.0761910524033774
P08964	MYO1	YHR023W	-0.165096951423596	0.0763485781213627
Q05937	STP3	YLR375W	-0.261751145292351	0.0767611269018644
Q12374	NCA2	YPR155C	0.281442029467414	0.076819104586795
Q08234		YOL075C	-0.354646849404268	0.0837110587911993
P10127	ADH4	YGL256W	-0.14938044263662	0.0769362747249814
P47154	STE24	YJR117W	-0.12964540464549	0.0769923369793699
P40535	CST6	YIL036W	0.194211766975066	0.0770030887636328
P04387	GAL80	YML051W	-0.182288171198664	0.103640133475726
P39083	RGA1	YOR127W	0.191228004519328	0.0812285819192379
Q03713	RCF1	YML030W	-0.358986945838701	0.0793136560037186
P40416	ATM1	YMR301C	-0.162342697010246	0.0774732534888668
Q12245	POC4	YPL144W	0.36754738213693	0.0778265110497895
P53854	CWC25	YNL245C	0.308943718189578	0.0798010788715268
P47016	NIT2	YJL126W	-0.3867266155906	0.0847562458736699
P43613	ERJ5	YFR041C	-0.283595938128475	0.0779988475030217
P38109		YBR139W	0.161168033643552	0.0780541148490844
P39531	RCY1	YJL204C	-0.238549272307694	0.0781122527071047
Q06263	VTA1	YLR181C	0.122642330117142	0.0783866307923577
Q12496	SDD3	YOL098C	0.13480690286606	0.0786634316594369
P53081	NIF3	YGL221C	-0.111096390507143	0.0786781785925623
Q08213	NGL1	YOL042W	-0.252661583927985	0.089472409036091
Q02206	RSC4	YKR008W	-0.182986223475201	0.0795071442516231
P25623	SYP1	YCR030C	0.117571578871161	0.0795692120394605
Q05942	RSA3	YLR221C	0.21376244336096	0.0798450768394205
P43611	OSW7	YFR039C	0.198335572830736	0.0799169142328422
P06781	RHO2	YNL090W	-0.266063259743238	0.0799214842854421
Q12272	TPT1	YOL102C	0.260098674869219	0.080004509712245
P24482	DPB2	YPR175W	0.220153302747558	0.0800429595794139
Q01574	ACS1	YAL054C	-0.543017778154361	0.0800532229562914
P40347	LTP1	YPR073C	0.202775505606294	0.08020118213619
P25366	OCA4	YCR095C	-0.235388193697769	0.0845296315464446
P53885	MDG1	YNL173C	0.187874282056491	0.0806109735301863
P32366	VMA6	YLR447C	0.148137655237811	0.0806324225306939
P38623	RCK2	YLR248W	0.146020943240426	0.0806717815797049
P17967	PDI1	YCL043C	-0.124768734353744	0.08067493968425
Q12017	PLP2	YOR281C	0.109369163464308	0.0807278186776758
P05745	RPL36A	YMR194W	-0.126631924734333	0.0808338444072789
P38801	LRP1	YHR081W	-0.214031187199538	0.0809552285671489
Q02201	OSH6	YKR003W	0.131182401693408	0.0809906548676442
P38749	YAP3	YHL009C	-0.156918840361886	0.081149196941463
P45978	SCD6	YPR129W	-0.143666716056142	0.0820705484620026
Q04322	GYL1	YMR192W	-0.209213273644206	0.0822269909484151
Q03338	PRP3	YDR473C	-0.184007684473624	0.0823411904186262
Q05881		YLR287C	0.241000637181724	0.082406866392638
Q12028	APL4	YPR029C	0.124700474975892	0.0824904341648323
Q12127;Q7LHD1	NA	NA	-0.471038895682945	0.0899505570203525
P40518	ARC15	YIL062C	-0.16674132812815	0.0831729337516256
P32462	ERG24	YNL280C	0.208772024271163	0.0875142545824605
P32769	HBS1	YKR084C	0.152055206696598	0.0841537708875939
P23594	PPH21	YDL134C	0.340829471196606	0.0845022854663919
P10834	PET54	YGR222W	0.169669883417939	0.0850494406552683
P39005	KRE9	YJL174W	-0.223954510248642	0.0870155786850346
Q03799	MRPS8	YMR158W	-0.179201736250384	0.0851033995597838
Q03795		YMR155W	0.422909976284043	0.0998122753926745
Q08484	GYP1	YOR070C	0.20603824110734	0.0853919384852446
Q3E6R5		YDR381C-A	0.202928318459623	0.0873947009925711
P07834	CDC4	YFL009W	-0.263857141062758	0.0925748856693925
P48415	SEC16	YPL085W	-0.100837187375785	0.0857075554597805
P22211	NPR1	YNL183C	0.12507696114444	0.0857428877951955
P26263	PDC6	YGR087C	-0.921116260762812	0.0877478629603407
P38113	ADH5	YBR145W	-0.684752967720282	0.0861255237956103
P38237	UBP14	YBR058C	0.118919066852786	0.0864739679679727
P23201	SPA2	YLL021W	-0.0897615191130789	0.0865979136669789
P39958	GDI1	YER136W	0.175728929331523	0.0866186776013815
Q07950	YEH2	YLR020C	0.324057440551723	0.0888017596477792
Q03161		YMR099C	0.105246562156367	0.0870626285131997
P53296	ATF2	YGR177C	0.79584704471327	0.0974195008770844
Q02771	PET117	YER058W	0.196985607487957	0.0894991922483366
P02406	RPL28	YGL103W	0.162526293284145	0.0879036182083632
P38239		YBR062C	-0.227434420836548	0.0879317876206599
Q03266	ABZ2	YMR289W	0.210835580077148	0.0925226019945173
P47124	HOC1	YJR075W	0.183339873245227	0.0883711746655954
Q12163	NBP2	YDR162C	0.198450716026613	0.0884217949159184
P40529	AGE2	YIL044C	0.209265182960142	0.088762918715701
P41818	GLC8	YMR311C	-0.161652473305953	0.0887790701070805
P39727	ERV46	YAL042W	0.195090827848471	0.0888180962038739
Q06108	RGC1	YPR115W	-0.262692685674267	0.0888949244120639
P40094	COG3	YER157W	0.189491144286912	0.0889318099033478
Q12402	YOP1	YPR028W	0.2083569661045	0.08898662623064
P40528	SYG1	YIL047C	-0.15996779484308	0.0909677490836399
P18899	DDR48	YMR173W	0.188769026653585	0.0892249757403523
P39008	POP2	YNR052C	-0.197489273050603	0.0893218250097398
P34163	TGL1	YKL140W	-0.183654203882224	0.0893885210936633
P23638	PRE9	YGR135W	0.13189941554986	0.0894131395526324
P32794	AFG2	YLR397C	-0.184817590089953	0.0896380973020532
P38085	TAT1	YBR069C	-0.251154455158748	0.0900717616261777
Q02260	SMD1	YGR074W	0.475677119196593	0.0922089272381473
P39940	RSP5	YER125W	0.0963591846170821	0.0903237398584326
P53881	MRPL22	YNL177C	-0.244485151068648	0.0908111475758552
Q04199	CAC2	YML102W	-0.187366947306337	0.0908729263082652
P36048	SNU114	YKL173W	-0.156028143117748	0.090954539804083
P40561	SGN1	YIR001C	0.192863437424656	0.0910324261847196
P40395	RIC1	YLR039C	-0.30275929602934	0.0910689361077413
P46678	BDP1	YNL039W	0.232201138198768	0.0913196048587568
P41896	TFG2	YGR005C	0.125862310846905	0.0914005329153518
P53303	ZPR1	YGR211W	-0.124637189808414	0.091522120706232
Q12154	GET3	YDL100C	-0.103197856309414	0.0915324942725675
Q04964	SML1	YML058W	-0.252392622995412	0.0916878057198497
P38824	COX23	YHR116W	-0.214360690777148	0.102147070519214
P07342	ILV2	YMR108W	-0.10256487412672	0.0917958592213891
P53278		YGR130C	0.174008873397359	0.0918070455824639
Q12292	ATG34	YOL083W	-0.366347997530987	0.106420758028463
P32604	FBP26	YJL155C	0.176869692404491	0.0928104921120027
Q12118	SGT2	YOR007C	0.115638289359129	0.0929938138608828
P15873	POL30	YBR088C	0.171659027504102	0.0931132328383048
Q02354	UTP6	YDR449C	0.150602537826654	0.0931911358484244
P38787	PAN5	YHR063C	0.13982911978588	0.0932518770051815
P53911	EAF7	YNL136W	0.569370625026558	0.100341698497913
P46990	RPL17B	YJL177W	0.0996741820484175	0.0936001363127399
Q06142	KAP95	YLR347C	0.200580879323354	0.0937915838365994
P47076	RPC17	YJL011C	-0.21245045867121	0.0939025826937593
P16664	RGP1	YDR137W	-0.128225199906218	0.0940404097881125
P28791	SEC20	YDR498C	-0.345659755627334	0.0960428726164127
Q12425	ISA2	YPR067W	-0.311756466651115	0.0941299308418698
P40089	LSM5	YER146W	-0.225448708495964	0.0942516248268706
P25360	PHO87	YCR037C	-0.19262075189258	0.0943174779933523
P53191	PIB2	YGL023C	-0.178111630076867	0.0944952344686817
Q01476	UBP2	YOR124C	0.106576338178268	0.0946490103016125
P53277	SYF2	YGR129W	-0.354496667179497	0.0989162895707608
P53551	HHO1	YPL127C	-0.176557457170755	0.0947734576853363
P38716		YHR112C	0.215206794594906	0.0955385759829195
P39931	SSP120	YLR250W	-0.224014118491255	0.0956777957344556
P07347	ARD1	YHR013C	0.135281352659973	0.0962139539395002
P28319	CWP1	YKL096W	0.252785903206266	0.0963857221417143
P32354	MCM10	YIL150C	-0.332260128352249	0.148575484238515
P40052		YER079W	0.398841476999632	0.103544775612232
Q02969	PEX25	YPL112C	0.13884448391655	0.096652366117109
P00950	GPM1	YKL152C	0.114232786943816	0.0969255254644592
P32767	KAP122	YGL016W	-0.268186639407741	0.0970257217020226
P53983	ASI3	YNL008C	0.338843935071306	0.107555373917417
Q12480	AIM45	YPR004C	0.123198427037142	0.0971647453144033
P0CX46;P0CX45	NA	NA	0.155263047951912	0.0974738412425253
P47068	BBC1	YJL020C	-0.119135161848604	0.0976784300972763
Q03525	TMA23	YMR269W	0.338906484656377	0.0977037974201216
Q03976	RSM24	YDR175C	-0.14946275747576	0.0977216829324378
P42945	UTP10	YJL109C	-0.100331805012896	0.0977365809760869
P48570	LYS20	YDL182W	0.126554647513487	0.0978209796938606
P28834	IDH1	YNL037C	0.125148757933161	0.0978742331541895
Q04013	YHM2	YMR241W	0.186766959209908	0.0979429464431694
Q06821		YPR084W	-0.268897837124371	0.108797785655899
Q12510	CMR1	YDL156W	-0.181039365692303	0.098472686789288
P02309	HHF2	YNL030W	0.155616290846318	0.0986295552161113
P02309	HHF1	YBR009C	0.155616290846318	0.0986295552161113
P40481	HPM1	YIL110W	-0.235456634998805	0.0990822081529745
P38966		YDR089W	0.345487614699984	0.1033712813121
Q08977		YPL260W	0.119973659322245	0.0991141757747895
P16622	HEM15	YOR176W	0.177994767352491	0.0993879690893297
P53140	RMD9	YGL107C	-0.144895577042224	0.0995631087325915
P53552	THO2	YNL139C	-0.130416283584196	0.0997073399849226
P0CX32;P0CX31	NA	NA	0.158618014832662	0.10002003639646
P40325	HUA1	YGR268C	-0.259532944859586	0.10005446096938
Q04437	YKU80	YMR106C	0.34845071002421	0.102096908817538
P43561	FET5	YFL041W	-0.116294680954681	0.10016847858221
P54837	ERV25	YML012W	0.172111451127126	0.100220697904479
P36144	UTP30	YKR060W	0.205445662595569	0.100268005806904
P32499	NUP2	YLR335W	0.0956759487250167	0.100347279035617
P22219	VPS15	YBR097W	-0.170524573182878	0.137983861262441
P21269	CCA1	YER168C	0.120398809038573	0.100686565475471
Q03327	UGO1	YDR470C	-0.192436900950391	0.100989638241626
P47093	LSM8	YJR022W	-0.288519471351702	0.105444145373857
P17558	PET123	YOR158W	-0.227880773324902	0.101360645138446
P38889	SKN7	YHR206W	0.253499242798942	0.101973662214752
Q12341	HAT1	YPL001W	-0.126713147543096	0.102100689739019
P17065	SEC2	YNL272C	0.210460787637643	0.102315994702238
P53923	NCS2	YNL119W	-0.304990800717924	0.102519761209511
P36120	DBP7	YKR024C	-0.168783739780192	0.102536731608552
P40567	MSL1	YIR009W	-0.409678630423578	0.102741864580755
P33296	UBC6	YER100W	-0.308777995664428	0.103129871024215
Q03435	NHP10	YDL002C	0.17120070036766	0.103297899521767
P38302	NTC20	YBR188C	0.416481977932662	0.11052379194031
P53086	KIP3	YGL216W	-0.238821322251646	0.103451977514976
P47054	NUP192	YJL039C	-0.110331384377776	0.103856587839025
P53858	BNI4	YNL233W	0.1803586740333	0.104032316337581
P50861	RIB4	YOL143C	0.236302757904909	0.104097206489344
P53955	SLM2	YNL047C	-0.261649184506531	0.11135630871396
P53157	MPC1	YGL080W	-0.275732457973778	0.108670298364602
Q12229	UBX3	YDL091C	-0.274222420761408	0.108982561884726
P38262	SIF2	YBR103W	0.157073992340642	0.104707212884718
P53281	LSB1	YGR136W	0.222889761576525	0.104729245011425
P12385	SUP45	YBR143C	0.105066267816834	0.104878471072161
P38291	POP7	YBR167C	0.200647833181765	0.109287828604592
P33309	DOM34	YNL001W	0.172506948527595	0.105035279118773
P07266	MRS1	YIR021W	-0.404787535924907	0.107171977568721
P14127;P02407	NA	NA	0.1223758457934	0.105555214350929
Q04170		YDR391C	0.218206970113307	0.105680063610968
Q3E757;P0C0W9	NA	NA	0.162320435938973	0.106270965929031
P40462	TMA108	YIL137C	0.0969284996149149	0.106423778966813
P05737	RPL7A	YGL076C	0.132953405024381	0.106453917601859
P40019	CHZ1	YER030W	-0.213087781840208	0.106498208835375
P40071	TMN3	YER113C	-0.201682206242815	0.11163596552929
Q12400	TRM10	YOL093W	-0.211670151484117	0.107595451213303
P40045	TDA2	YER071C	-0.241922451859647	0.107651390660166
Q12321	MED1	YPR070W	-0.202052291819619	0.107859219343301
P38234	RFS1	YBR052C	0.0945350229023241	0.107987983571489
P53863	JJJ1	YNL227C	-0.430890431669841	0.112755233383703
Q02892	NOG1	YPL093W	-0.126866581901851	0.10848059076885
P14922	CYC8	YBR112C	-0.106701019521388	0.10852340575786
P28004	PRP45	YAL032C	-0.21738110109203	0.111210358089828
Q12032	AIM41	YOR215C	0.151950272924278	0.109240450660245
P33892	GCN1	YGL195W	-0.0848742086387198	0.109276276504488
Q05854		YLR278C	-0.267387949199009	0.10936064047112
P38286	IFA38	YBR159W	0.192887195529174	0.109700974639765
P35845	SWH1	YAR042W	-0.127141141500758	0.110555107905566
Q06644	PMT7	YDR307W	-0.215747358942057	0.11108932273897
P47166	SGM1	YJR134C	0.15540149205864	0.11122053428708
P53899	CUZ1	YNL155W	-0.154960570989822	0.11139370706349
P0CH08;P0CH09;P0CG63	NA	NA	0.244979107995793	0.111450620559451
P40157	VID27	YNL212W	-0.120190560143016	0.11146565002083
Q12080	NOP53	YPL146C	-0.142425838105709	0.111818383165226
Q06817	GRS2	YPR081C	0.229268219941062	0.113829862144757
P32521	PAN1	YIR006C	-0.109055215654205	0.111890743979136
P39990	SNU13	YEL026W	0.156713822053831	0.111894383959295
Q12372	MMP1	YLL061W	-0.355357222103606	0.132208481120771
P11938	RAP1	YNL216W	-0.136742003995405	0.112015520122279
Q02554	CUS1	YMR240C	0.221449973958595	0.112015584131243
Q06815	MRL1	YPR079W	-0.20960200772852	0.114069191613988
P38707	DED81	YHR019C	-0.0989551558464257	0.112351228772942
P35191	MDJ1	YFL016C	0.114798659758939	0.112568665040103
Q06156	YCS4	YLR272C	-0.506012357383408	0.133209312096738
P38064	MRPL16	YBL038W	-0.216697771665782	0.11306382377116
P38883	RIX1	YHR197W	-0.160094469627989	0.113169601171407
P28778	MRP17	YKL003C	-0.241287616341062	0.113201853512134
P22224	SEC15	YGL233W	-0.128570612011465	0.113217988699052
P50947	PHO23	YNL097C	0.367812841149487	0.113558741303284
P33893	PET112	YBL080C	0.262846756091719	0.121171541004081
P32449	ARO4	YBR249C	-0.11234014965164	0.114108065239074
P34237	COY1	YKL179C	-0.119126935472018	0.114241451446071
Q12746	PGA3	YML125C	0.14254145425507	0.114387018456477
P29952	PMI40	YER003C	0.117208594820148	0.11451637586648
Q03233	ADD37	YMR184W	-0.247278359143404	0.114913683855351
Q04062	RPN9	YDR427W	-0.107791508211637	0.114953186121738
P17076	RPL8A	YHL033C	0.225731157399871	0.115218315470235
P40530	PKP1	YIL042C	0.393703370695903	0.125771184292388
Q06493	YLH47	YPR125W	-0.207269024767196	0.115260954379981
P38351	PAF1	YBR279W	0.158017032370871	0.115324686354288
Q04233	GIS4	YML006C	-0.215524370788881	0.115757527621032
P06776	PDE2	YOR360C	-0.236098023049749	0.115946212352457
P20084	MRPL33	YMR286W	-0.119165486057078	0.11716084040332
P33412	ECT1	YGR007W	-0.171433306972371	0.117334410118871
P40013	BIM1	YER016W	-0.0940236350959403	0.11741427015985
P00358	TDH2	YJR009C	-0.28557611765347	0.11748597987067
P38869	SVP26	YHR181W	0.155807815385522	0.117678813626111
Q08001	LAM6	YLR072W	0.176031570120067	0.117728534209832
P49955	HSH155	YMR288W	-0.132430180664578	0.118344122410501
P40957	MAD1	YGL086W	0.152750400633419	0.118591169472404
P34220		YBL055C	0.142728275650491	0.118782032308972
P39526	LAA1	YJL207C	-0.213637658112095	0.118792812383699
P39927	PTI1	YGR156W	0.171772995725966	0.118859194768785
P53298	OKP1	YGR179C	0.212321235726943	0.12093376940957
P40079	LCP5	YER127W	-0.0985553061422557	0.119572052855824
P40559	INP51	YIL002C	-0.222172366140082	0.1345859954298
P32608	RTG2	YGL252C	0.0901070142099556	0.120001553021356
P48236		YGR149W	-0.195465660431982	0.127337338584059
P32610	VMA8	YEL051W	0.104462941574734	0.12024372770555
P23796	RIT1	YMR283C	-0.216112970791414	0.157956139466252
P38304	MED8	YBR193C	0.165710210623178	0.120424077169057
Q06070		YLR407W	0.175274082619822	0.120445847891483
P53210		YGR017W	0.128097308591691	0.120543488439072
Q02326	RPL6A	YML073C	-0.14200805947678	0.120812192650598
P38797	PTC7	YHR076W	0.1346156206037	0.12097375050046
P22936	APN1	YKL114C	0.157992914042655	0.121028599868947
P0CX58;P0CX57;O74302;Q12470	NA	NA	-0.349205808091536	0.121126618472375
P40517	YRB2	YIL063C	-0.187614287229913	0.12136752706802
P53919	NAF1	YNL124W	0.17262453385327	0.121725239720396
P11412	ZWF1	YNL241C	0.113703654716286	0.121863600918325
P48564	MRX6	YNL295W	-0.498532883865671	0.15957527406965
P22543	VPS34	YLR240W	0.272567040293271	0.136898842652928
Q05530		YDR286C	0.302406781368333	0.133017833169992
P40991	NOP2	YNL061W	-0.0928277200526963	0.122847200433463
Q00916	SNP1	YIL061C	-0.389279923043894	0.143352473603772
O13539	THP2	YHR167W	0.16840465945193	0.127768794489669
P39103	COX14	YML129C	0.343633411109341	0.123803906076859
P05748	RPL15A	YLR029C	-0.094778830123154	0.123813201447147
P25847	MSH2	YOL090W	-0.0946384045227724	0.123889267902422
Q03768	GIR2	YDR152W	-0.125795926281107	0.123989622032962
Q08687	TMA16	YOR252W	-0.215170302198988	0.124006968103714
Q96VH5	MIC10	YCL057C-A	0.246149774555626	0.125998417954523
P38336	POP4	YBR257W	-0.200287247735847	0.152300874197379
Q06005	LIP2	YLR239C	-0.23284642033958	0.13541445537857
Q04279	SEG1	YMR086W	0.0980620651594002	0.125428720370559
Q12084	DAS2	YDR020C	-0.162325916411682	0.12560705368504
Q99316	MPD2	YOL088C	0.154383726527392	0.125738255403407
P13856	RSR1	YGR152C	-0.135523260934768	0.125779859791485
P38691	KSP1	YHR082C	-0.186726121036635	0.126002656864886
Q3E793		YAL044W-A	-0.206268920736019	0.126045300504214
P33332	SEC3	YER008C	0.0890704078411524	0.126264606649541
P38337	SHG1	YBR258C	0.206512455308914	0.146839206829367
Q12697	YPK9	YOR291W	0.18607722934345	0.126769425055296
P38887		YHR202W	0.212460265996754	0.141760867096079
P33734	HIS7	YBR248C	-0.100845798122528	0.126938805097167
P53905	LSM7	YNL147W	0.207209762315806	0.127065251948096
P14680	YAK1	YJL141C	0.226167304180279	0.127094878851851
P34250	SEG2	YKL105C	0.204811109676029	0.127295226151854
P50945	MIC27	YNL100W	0.18027213733135	0.127371459669208
P34078	LTV1	YKL143W	-0.171139552965442	0.127781907465038
Q06436	MAG2	YLR427W	0.246776137765419	0.128101151580233
P38961	RRP8	YDR083W	-0.156186860844329	0.12829496189604
P38993	FET3	YMR058W	-0.158783488590782	0.128336779635369
Q06506	RRP9	YPR137W	-0.110199965810427	0.128451318335796
Q12099	FAL1	YDR021W	-0.31266980809901	0.128545595053745
P32867	SSO1	YPL232W	-0.193286409840649	0.128565144772599
Q07362	PBP4	YDL053C	-0.116056393912405	0.128865664794763
P53549	RPT4	YOR259C	0.109207274285477	0.128947657503638
Q04003	SAS4	YDR181C	0.329687836398929	0.205061002205514
P53309	YAP1802	YGR241C	0.246974081329974	0.129010828801056
P41921	GLR1	YPL091W	0.0975580412586616	0.12911159939042
P32900	SKG6	YHR149C	-0.401211891606678	0.129336437684
Q06549	CDD1	YLR245C	0.265859482660481	0.13154537120121
P31373	CYS3	YAL012W	0.083023384010211	0.129633801081241
P21147	OLE1	YGL055W	-0.229433558291635	0.130264822175783
Q03330	GCN5	YGR252W	0.234263782179184	0.130337058852381
P47136	BUD4	YJR092W	-0.169614085147824	0.130647831356253
Q03790	NUP53	YMR153W	-0.15414281020977	0.130792074449046
P53723		YNR021W	-0.139711319004522	0.131313639261409
P33300	SUR1	YPL057C	-0.286069160483141	0.151890220824743
Q05863		YLR281C	0.234852184245074	0.142547842927242
P25626	IMG1	YCR046C	-0.177976608238961	0.132257362737947
Q03722		YML020W	-0.409249382109252	0.132352818362934
P32566	SMI1	YGR229C	-0.179179007734703	0.132557783849931
P36421	TYS1	YGR185C	0.113113275222751	0.132667708656775
P31378	NTG1	YAL015C	0.326157687537222	0.208717025547227
P35844	KES1	YPL145C	0.102873943564166	0.132777784198378
P26784	RPL16A	YIL133C	0.196443481247186	0.132790357024516
Q3E772	LSO2	YGR169C-A	0.156137807245514	0.132813201053201
P48526	ISM1	YPL040C	0.453957711020855	0.133242151225995
P49089	ASN1	YPR145W	-0.112322921864969	0.133387419701566
Q08651	ENV9	YOR246C	-0.246025815842987	0.138211977516655
P00546	CDC28	YBR160W	0.133457330256459	0.133950163871421
Q06001	FAR10	YLR238W	0.292261161352886	0.154337196796334
P16862	PFK2	YMR205C	0.0923243488975345	0.134145254864068
Q12494	KCS1	YDR017C	-0.131871849363804	0.134209401098111
P47141	RSM26	YJR101W	-0.226306366452992	0.134637795308633
P53270		YGR117C	0.138314126023744	0.134915708703625
P05738	RPL9A	YGL147C	0.096261331421104	0.134982035792693
P21306	ATP15	YPL271W	0.233864510175518	0.135091430406897
P40364	MPM1	YJL066C	0.217903658812212	0.135275375106059
P53962		YNL035C	-0.118227633043755	0.13552016505639
P0CX30;P0CX29	NA	NA	0.113307873627228	0.135788017972011
P47075	VTC4	YJL012C	-0.106279935832227	0.136007021584232
Q05934	VID22	YLR373C	-0.151155680849694	0.136163431176608
P46947	BUD13	YGL174W	-0.155332424733636	0.136781913799364
P28817	EHD3	YDR036C	0.157084108560575	0.137147024500866
Q06624	AOS1	YPR180W	0.173199952774482	0.137331906615198
P39960	BEM2	YER155C	-0.0875519016600705	0.137406135482938
Q07794	RTT109	YLL002W	0.311936924837521	0.141764092010934
Q08179	MDM38	YOL027C	-0.125337187558284	0.137513294650762
P32902	MRP4	YHL004W	-0.134757401494248	0.137586352896843
P32644	ECM32	YER176W	0.147574613645212	0.137849876598078
P33448	TOM6	YOR045W	0.237692904609467	0.137984467973373
P25573	MGR1	YCL044C	0.1329400095238	0.138152554020238
Q03088	SVL3	YPL032C	0.126128760702624	0.138446644007425
P36775	PIM1	YBL022C	-0.100078590002212	0.138642307435949
Q12296	MAM3	YOL060C	-0.242354938500249	0.139362359566476
P00427	COX6	YHR051W	-0.172624428587419	0.139701016191105
P38205	NCL1	YBL024W	-0.0840722246695194	0.139827869149031
Q03388	VPS72	YDR485C	-0.244100050361478	0.14030905787443
P27514	PHO91	YNR013C	0.117128007134848	0.14034882541562
P20484	MAK11	YKL021C	-0.142875933937894	0.140911598158688
P03871	REP1	R0020C	0.226765444053918	0.141108168619242
Q03103	ERO1	YML130C	-0.117608705396407	0.141199498008183
P38081		YBR056W	0.105325131726783	0.141532949766787
Q99297	ODC2	YOR222W	0.174577905725755	0.143941131798829
P10823	GPA2	YER020W	0.189879873095087	0.14207575264868
P30624	FAA1	YOR317W	0.152825255316248	0.142166306970347
P15019	TAL1	YLR354C	0.0878598496080869	0.142215808504706
Q99210		YOR111W	0.204127749783641	0.142351068483863
P23595	PPH22	YDL188C	0.14050850432324	0.142763044495055
Q04693	RSE1	YML049C	0.186862389649114	0.142821167763637
Q06511	RRP15	YPR143W	0.206195939308071	0.142845369440495
P32319	PEP1	YBL017C	0.083049711393727	0.142866084556105
P47025	MDV1	YJL112W	-0.122050702812228	0.142913943926096
P38745		YHL017W	-0.379510546623521	0.143062228333633
P0CT04	PBI2	YNL015W	0.140326419631222	0.14307481933409
P36519	MRPL7	YDR237W	-0.147461426035548	0.143312532214264
P39079	CCT6	YDR188W	-0.111718696990145	0.143483140421653
Q05123	ARP9	YMR033W	-0.108386351199016	0.14360600580003
P49957	TRM9	YML014W	-0.186503835032021	0.143865472933943
Q00539	NAM8	YHR086W	0.252473751041389	0.143903135698322
P32377	MVD1	YNR043W	0.118950077264255	0.144126566721862
Q06106	MRD1	YPR112C	-0.138559602681429	0.144540730051437
P23292	YCK2	YNL154C	-0.139011145166712	0.144650208901513
P07560	SEC4	YFL005W	-0.119845275138108	0.144835412003776
P38272	SHE3	YBR130C	0.140852070041376	0.145558748017069
Q12523		YPL247C	0.162045462893268	0.145637886543657
P23369	MRPL25	YGR076C	-0.135518877991103	0.145734514262032
P38199	HEK2	YBL032W	-0.141594998342615	0.145790616353028
P52491	UBC12	YLR306W	-0.195048352964015	0.156351485259368
Q02825	SEN54	YPL083C	0.317826594236276	0.161021174991287
P25567	SRO9	YCL037C	0.169114222956694	0.14634412404524
P39007	STT3	YGL022W	-0.154495546212523	0.146414255947401
P28320	YJU2	YKL095W	0.24539527413112	0.146425402610567
P25569	GID7	YCL039W	0.322764348042863	0.148728375489125
P39707	SEN34	YAR008W	-0.405091827400401	0.158126222565318
P32843	YME2	YMR302C	0.134860895836006	0.147780059510124
P53276	UTP8	YGR128C	-0.151662975712679	0.147926954467008
Q04031	RRP17	YDR412W	-0.18144414015627	0.148188864521764
P0CX50;P0CX49	NA	NA	0.112928750384555	0.148250060402338
P54784	ORC1	YML065W	-0.259558601516346	0.14826872758789
P25605	ILV6	YCL009C	0.127340954385382	0.148367139703751
Q03264	NGL2	YMR285C	-0.111103649444757	0.148385349773914
P40098	FMP10	YER182W	-0.211030505580798	0.148617979211317
P22579	SIN3	YOL004W	-0.0903780039774382	0.148629015194227
Q03212	EAR1	YMR171C	-0.291910674100446	0.155816466152565
P36533	MRPL39	YML009C	-0.201915725814356	0.15309306711001
P53878		YNL181W	0.139913665527931	0.148782155457893
P39969	BOI2	YER114C	-0.128192284263871	0.149174542974793
P14772	BPT1	YLL015W	-0.100759799089328	0.149302617195904
P33767	WBP1	YEL002C	-0.132116111756915	0.14956626316577
P38087	YMC2	YBR104W	0.207172013843678	0.17715893215786
P36103		YKL023W	0.205352785954467	0.149993907872914
P38970	HAL5	YJL165C	-0.125383774334743	0.150424041847009
P0CX36;P0CX35	NA	NA	0.108323314289684	0.150645734726579
P53217		YGR026W	-0.195709707414711	0.151266032461456
P54780	RPL15B	YMR121C	0.195504141889192	0.151596580425942
P11325	NAM2	YLR382C	-0.235046868201302	0.151619655790661
P00912	TRP1	YDR007W	0.208849548955016	0.152911732340448
P38276		YBR137W	0.163039252144081	0.153502938253007
Q04894	ADH6	YMR318C	-0.129018590139914	0.153568910985858
P53954	ALG11	YNL048W	-0.131131868752984	0.153599763973002
Q08685	CLP1	YOR250C	0.215469189261199	0.153789289897756
P07244	ADE5,7	YGL234W	0.0857473405771039	0.154017893080264
P31109	SNC1	YAL030W	-0.280692206941517	0.15427349856932
P53720	SMM1	YNR015W	0.158078645903334	0.15431839360424
P42938	TDA10	YGR205W	0.202124400561654	0.154362660959672
P20434	RPB5	YBR154C	0.139348702460733	0.155593402663756
Q00711	SDH1	YKL148C	-0.188901351908651	0.156009264112657
P35688	LRG1	YDL240W	-0.237663089359462	0.156032650580911
P32776	TFB1	YDR311W	-0.141614116204654	0.156066077956393
P28625	YIM1	YMR152W	-0.163573947489436	0.156102245837605
Q03834	MSH6	YDR097C	-0.0990175977653536	0.156492163333745
P35176	CPR5	YDR304C	0.161633846109602	0.156961366705747
P38968	SEC31	YDL195W	0.0842330280669366	0.157037838203298
P27999	RPB9	YGL070C	-0.156841951641752	0.1572868456195
Q04951	SCW10	YMR305C	-0.1321547010986	0.158378580636923
P38779	CIC1	YHR052W	-0.112032525305573	0.15844973705951
Q03496	TRM732	YMR259C	-0.100429442075196	0.158633066885913
P17442	PHO81	YGR233C	0.167581461758509	0.158909506926222
P25719	CPR3	YML078W	0.168888977317515	0.158943274514315
P38127	RIM2	YBR192W	0.162315204552954	0.158964802985688
Q03254	FCP1	YMR277W	-0.108785875540121	0.159069400462527
P48240	MTR3	YGR158C	0.187190208612861	0.159080868246468
Q05022	RRP5	YMR229C	-0.085016406972187	0.159140756131205
P18888	SNF6	YHL025W	-0.28302119827887	0.163757210464205
P53203	PEX31	YGR004W	-0.128438024027759	0.159487621064174
P53980		YNL011C	0.252572079342364	0.163806814169082
P07257	QCR2	YPR191W	0.195959453590262	0.159690191011032
Q08773	ISW2	YOR304W	0.136876863048659	0.160507518376803
Q99312	ISN1	YOR155C	0.173275834791951	0.161806050124104
Q08960	TYW1	YPL207W	0.133944528935597	0.161888576586112
P32485	HOG1	YLR113W	0.107975091618322	0.162002600557451
P52490	UBC13	YDR092W	0.126207103243619	0.162259356924584
P34730	BMH2	YDR099W	0.187650692984445	0.162551329734524
P38249	RPG1	YBR079C	-0.11932514191647	0.162644560623122
P38819	ERP5	YHR110W	0.224746703549584	0.162909671713419
P29496	MCM5	YLR274W	-0.104937360023662	0.163483926005052
P25299	RNA15	YGL044C	0.149381295472477	0.164548984422436
Q99258	RIB3	YDR487C	0.145625754848389	0.164964621891053
P53037	PSD2	YGR170W	0.204413419557959	0.172044819345986
P08465	MET2	YNL277W	0.448588602147929	0.175440740232468
P47128	EAF6	YJR082C	0.27656625382382	0.165363579950059
P38969	PNT1	YOR266W	-0.129118153484594	0.176220336030446
P06102	NOT3	YIL038C	-0.0887230222735127	0.165833008696187
P41813	FKH2	YNL068C	-0.293025024060771	0.170155162751022
P15496	IDI1	YPL117C	0.106187036035791	0.165995784691186
Q12049	THP3	YPR045C	-0.153004769100132	0.166044780045829
P39077	CCT3	YJL014W	0.106519981347716	0.166540461468966
P46957	POL31	YJR006W	0.237759982336073	0.166576531431154
P10663	MRP2	YPR166C	-0.132537275168094	0.173770512742108
P53316		YGR250C	0.146491372593399	0.166749046717333
P06782	SNF1	YDR477W	-0.0973020071967667	0.166960384573193
Q99287	SEY1	YOR165W	-0.099478173021307	0.166988693996177
Q12186	MSL5	YLR116W	-0.152575863714109	0.167336905474454
Q08951	APL5	YPL195W	-0.133740287553131	0.167948841441093
Q12345	IES3	YLR052W	0.147853030994359	0.168424361570074
P20457	PRI2	YKL045W	0.222535786340693	0.168752776250724
P53159	MPS2	YGL075C	-0.228198893157945	0.183842655614865
P38863	SPC97	YHR172W	-0.158521271291608	0.169438137643422
P04912;P04911	NA	NA	0.163792859765216	0.169772300325488
P53299	TIM13	YGR181W	0.139409248623668	0.169892994511534
P36000	APL2	YKL135C	-0.153080367979971	0.1700063151946
Q06168	SFH1	YLR321C	-0.175045204314785	0.170113036308497
P23202	URE2	YNL229C	0.145242173894104	0.170196479303759
Q06407	RGA2	YDR379W	0.204802424534581	0.170512670502313
P25386	USO1	YDL058W	-0.120553329352045	0.17148954170235
P08417	FUM1	YPL262W	0.0909080293952655	0.171920998614314
P16603	NCP1	YHR042W	-0.0970282476117568	0.172098184620722
P35996	MRPL38	YKL170W	0.169941787855542	0.172240017195411
P52891	NUP84	YDL116W	-0.103502711936461	0.172469371373082
P39535	PHO90	YJL198W	0.125206644294568	0.172748710180233
P20133	BET2	YPR176C	-0.237250849752034	0.209304894957577
Q00955	ACC1	YNR016C	0.15859622486667	0.17283466839437
P32799	COX13	YGL191W	0.22052268295424	0.173070609717296
P0C2I7	NA	NA	-0.374433755809683	0.17308250473944
P25378	RHB1	YCR027C	0.340171506926939	0.173555810850375
P06704	CDC31	YOR257W	0.116116562667763	0.173774609838425
Q07623	NOP6	YDL213C	-0.133194186536979	0.174319414066497
P38822	BZZ1	YHR114W	-0.0832765388732319	0.174327950388557
P32790	SLA1	YBL007C	-0.0956182862270261	0.174521032286513
Q07457	BRE1	YDL074C	0.106266465581179	0.174529028645364
P52892	ALT2	YDR111C	0.197127530174448	0.174585743266196
P41810	SEC26	YDR238C	-0.0746448317602955	0.174644004771759
P28789	HEM3	YDL205C	0.131691189611114	0.174869237996559
Q00402	NUM1	YDR150W	-0.0818602234284427	0.174949614123801
P32525	ECM25	YJL201W	-0.294228088023964	0.175433168677682
Q06625	GDB1	YPR184W	0.209145799720726	0.179705966924066
Q03674	PLB2	YMR006C	-0.199909624796032	0.175488751010799
P38934	BFR1	YOR198C	-0.0820143656034382	0.175868260535528
Q12288		YLR126C	-0.116214615348422	0.176086108897509
P07807	DFR1	YOR236W	0.177416511416411	0.176107628483088
Q12117	MRH1	YDR033W	0.0858656554574857	0.176110291090132
P33299	RPT1	YKL145W	0.0982627759580446	0.176122402801505
P38708		YHR020W	-0.0823439597432092	0.176816915991794
P10081	TIF2	YJL138C	0.0849991982410643	0.176897958349954
P10081	TIF1	YKR059W	0.0849991982410643	0.176897958349954
P40186	PCL7	YIL050W	0.292749472902102	0.213364370890088
P38116	ARL1	YBR164C	0.21821882872036	0.177045041120602
P36154	AIM29	YKR074W	-0.167887088202725	0.177187996048563
Q6WNK7	SUS1	YBR111W-A	-0.17669204340466	0.181588779327941
P21373	UTR1	YJR049C	0.214548111522532	0.177690395393778
P39677	MEF2	YJL102W	-0.264169780705288	0.177994796727886
P54786	ZDS2	YML109W	-0.159096620214687	0.178113167868384
P33895	NUF2	YOL069W	-0.147176656508702	0.178358217747085
P52911	EXG2	YDR261C	0.237393441884898	0.180462507627736
Q08932	RSA1	YPL193W	-0.150671116749717	0.178739286706884
Q8TGJ3	KSH1	YNL024C-A	-0.44764114771867	0.189694992849043
P38210	LDB7	YBL006C	0.206457426241002	0.17976241059894
P46951	YPP1	YGR198W	-0.137375520853823	0.180228816149161
P38339	RGD1	YBR260C	0.213204643665694	0.180837633321177
P41910	MAF1	YDR005C	-0.224953440067139	0.18277291082825
Q12309	CLF1	YLR117C	0.250163786274662	0.181288610488839
P36016	LHS1	YKL073W	-0.100147983054153	0.181351377586855
P08525	QCR8	YJL166W	0.271577731692847	0.18145457344031
Q04660	ERB1	YMR049C	-0.0839342557022533	0.181925202106988
Q06677	SWA2	YDR320C	-0.118881637633741	0.182047065238577
P26637	CDC60	YPL160W	-0.0806350281822006	0.182198533050228
P00560	PGK1	YCR012W	0.0876486544642532	0.182385569639568
Q99247	DUF1	YOL087C	-0.0969935573668259	0.182423956976179
P15705	STI1	YOR027W	-0.0784069964557617	0.182456200466987
P38068	GRX7	YBR014C	0.222059273881008	0.182959136364388
P53139		YGL108C	-0.278053380757395	0.185521125421648
P40150	SSB2	YNL209W	-0.159758240271639	0.183658763198786
P38837	NSG1	YHR133C	-0.156263811552197	0.184228683803793
P20049	TYR1	YBR166C	-0.105238734221665	0.184786446169783
Q03151	MTG1	YMR097C	0.177137986970049	0.199192935914537
P00812	CAR1	YPL111W	0.192734786498789	0.185042326060119
Q08818	MSC6	YOR354C	-0.144034587270614	0.185316373602495
Q01080	RPA49	YNL248C	0.0799048014238579	0.185371435226134
P25491	YDJ1	YNL064C	0.120662490244069	0.185753524048898
P07172	HIS5	YIL116W	0.184341956253665	0.185829735315341
P39547	UIP3	YAR027W	-0.114278893183048	0.205414402733684
P49775	HNT2	YDR305C	0.243379249225342	0.187888874881178
P53915	NRK1	YNL129W	-0.198601579980753	0.18607066044622
Q12498	PRM4	YPL156C	-0.253755825397413	0.200828114231696
Q6Q560	ISD11	YER048W-A	0.169103726246487	0.186573216636474
P32447	ASF1	YJL115W	0.140078501973786	0.186682278619588
Q08965	BMS1	YPL217C	0.11362445336453	0.188001747584015
Q12418	GIS3	YLR094C	-0.15216697244016	0.198444864561291
Q05946	UTP13	YLR222C	-0.0900451675476184	0.188404779221827
P32266	MGM1	YOR211C	0.0907761179117301	0.188563238371063
P53100		YGL185C	0.109241962776906	0.188612515869798
P52489	PYK2	YOR347C	0.137604481803919	0.189575711622269
Q3E731	COX19	YLL018C-A	0.237283146727595	0.193798193138678
P38328	ARC40	YBR234C	0.101540736834124	0.189943221974261
P17536	TPM1	YNL079C	-0.110301061625552	0.190194464172066
P53920	NMA111	YNL123W	0.093515110565054	0.190295239385354
O13516	RPS9A	YPL081W	-0.31782677881942	0.205378581795958
P40070	LSM4	YER112W	0.134023539391041	0.191454262198927
P43609	RSC8	YFR037C	0.0968409789175695	0.191467425541464
P32469	DPH5	YLR172C	-0.121307070903349	0.191559048980642
Q02883	FMP30	YPL103C	0.203139480385122	0.19418145703315
Q04066	BNA7	YDR428C	-0.109080028046012	0.19248734968145
Q07657	SHS1	YDL225W	0.10849798519385	0.192488973054799
Q02792	RAT1	YOR048C	0.101202360487829	0.193646116772852
P32892	DRS1	YLL008W	-0.0731740265621816	0.193759541962743
P53152	MMS2	YGL087C	0.152512294625932	0.194005457627072
P26321	RPL5	YPL131W	0.120576455691427	0.194437830417177
P00729	PRC1	YMR297W	0.114434564717694	0.195166416598284
P12695	LAT1	YNL071W	0.0987494971518146	0.195600784198107
Q3E762		YBR230W-A	-0.270568526935726	0.199938803272327
Q06169	PEX30	YLR324W	-0.101721959456238	0.196678460211223
P40214		YMR144W	0.437788288968513	0.216159589203775
P53879	RHO5	YNL180C	0.148642571887418	0.197271958826547
P04046	ADE4	YMR300C	0.0854282612610575	0.19728938609626
P53262	VOA1	YGR106C	-0.247503307413766	0.197321158848699
P38187	UBP13	YBL067C	-0.186944177239717	0.197413984634309
P39724	AIM1	YAL046C	-0.213676820368441	0.197689597364415
P43598	IGD1	YFR017C	0.158129048451887	0.208166323195634
P41056	RPL33B	YOR234C	0.247116698688416	0.19899703288897
Q08972	NEW1	YPL226W	-0.0741408014750107	0.199084304961181
Q05775	HCR1	YLR192C	0.0910939231369596	0.199615173536317
P14120	RPL30	YGL030W	0.0862390051229056	0.199917648763424
P07262	GDH1	YOR375C	-0.101562990989329	0.200141360059084
P47017	LSM1	YJL124C	0.15596706900957	0.200255044956578
Q08412	CUE5	YOR042W	0.102006195297211	0.200378896674875
Q12745	SEC39	YLR440C	-0.1267040129135	0.200436415585637
P53090	ARO8	YGL202W	0.115562101990889	0.200654743949189
P53272		YGR122W	-0.202037170437933	0.202699400606435
P53736		YNR040W	0.165313178159025	0.205606080182091
P16861	PFK1	YGR240C	0.0832607332650817	0.201517139140046
P31385	DEP1	YAL013W	0.168817617770895	0.201767399250483
Q04458	HFD1	YMR110C	0.145956177101901	0.201887753172241
P19073	CDC42	YLR229C	-0.239762413392	0.202001931915774
P22515	UBA1	YKL210W	-0.0683476663398039	0.202019194000172
P38065	APL3	YBL037W	-0.137040521269736	0.202070817785469
P49686	NUP42	YDR192C	0.184869010206505	0.202237956981506
P22804	BET1	YIL004C	-0.165880564257691	0.204285662102185
P32529	RPA12	YJR063W	-0.202280956804504	0.204834015549277
P25566	MXR2	YCL033C	-0.278886927707624	0.204955952358014
P33894	STE13	YOR219C	-0.183023756855444	0.205406035913976
Q12242	RUP1	YOR138C	-0.171258474922059	0.20695603851487
P39968	VAC8	YEL013W	0.081763588092258	0.207012207601043
P42845	STB1	YNL309W	-0.216378509257147	0.207211844761949
Q08199	SIL1	YOL031C	-0.131688590779298	0.207638400654067
Q06563	SYM1	YLR251W	0.261423231159846	0.221842936118336
Q12189	RKI1	YOR095C	-0.129508143210298	0.207980804665954
P53075	SHE10	YGL228W	-0.0876993529192482	0.208401445824936
P20435	RPO26	YPR187W	-0.192113698007486	0.209456211330415
P22138	RPA135	YPR010C	-0.0804542378030142	0.209467129462747
P08425	MSF1	YPR047W	-0.202669799391227	0.216221734797303
P32528	DUR1,2	YBR208C	-0.39323288103569	0.219438382059444
Q12517	DCP1	YOL149W	0.0947536774164064	0.209532563541118
P81449	TIM11	YDR322C-A	0.191671532433126	0.209988139493346
P38777	FSH1	YHR049W	-0.146427610037701	0.21013564616193
Q3E764	TMA7	YLR262C-A	-0.103968558803661	0.210267437789637
Q06682	UBX5	YDR330W	0.098285050494912	0.210473847352983
P19880	YAP1	YML007W	0.174233474986792	0.210542139068033
P36119		YKR023W	0.0907471399047779	0.210599495980743
Q04689	AIM32	YML050W	0.211109519283205	0.220782654867278
P47048		YJL049W	0.323949822673601	0.210928502279442
Q12168	ACF2	YLR144C	0.127655114811681	0.21104093008881
P28708	PRR1	YKL116C	-0.138342750956014	0.212065345568182
P53078	SDT1	YGL224C	0.135214012946296	0.212388714200361
Q01802	AAT1	YKL106W	0.13561274489896	0.21242855331515
P39538	UBP12	YJL197W	0.128081945421577	0.212736614969057
P53066		YGL242C	-0.096824890223612	0.213285873506852
P47104	RAV1	YJR033C	-0.132890196700089	0.213388979111658
P53168	DUO1	YGL061C	0.167593051115283	0.214705951094818
P53741	BRE5	YNR051C	-0.144002123395158	0.214717535845473
P25037	UBP1	YDL122W	-0.10939467705866	0.215427519591564
Q04406	EMI1	YDR512C	-0.12970703260801	0.219495399933639
Q12753	HAA1	YPR008W	-0.161051681181217	0.215530525773212
P34111	TFC3	YAL001C	0.179190871786467	0.215736837271184
P0CX34;P0CX33	NA	NA	0.174379394850327	0.215940785109344
P35691	TMA19	YKL056C	0.11947079387965	0.216288438761245
P40510	SER33	YIL074C	-0.0714040133611995	0.216361004610241
Q02629	NUP100	YKL068W	-0.125933685655923	0.21646630602616
P40099	FAU1	YER183C	0.158976112299943	0.223189305453112
P47050	RTT101	YJL047C	-0.219604436642012	0.219049004773031
P02992	TUF1	YOR187W	0.0774334008142503	0.217955019873885
P27692	SPT5	YML010W	-0.0730049747145323	0.218848415890388
Q06892	POS5	YPL188W	-0.212507888493548	0.218869551957523
P32464	HYM1	YKL189W	0.174999493636559	0.219270387477351
P38256		YBR096W	0.109335154703437	0.219745058174819
P05744	RPL33A	YPL143W	0.100717686249666	0.219869000420347
P06100	CDC36	YDL165W	-0.171642970768229	0.220406819231046
P53040	TAF6	YGL112C	0.0866497051549757	0.220414293261802
P21734	UBC1	YDR177W	0.107232174972513	0.220483349196638
P21592	COX10	YPL172C	-0.249493169113439	0.255396881591476
P28273	OXP1	YKL215C	0.0783291021229431	0.22102058502855
Q04119	PPN1	YDR452W	0.101440889430403	0.221139017540115
P29704	ERG9	YHR190W	-0.0927963173936952	0.221141866297859
P42934	PMT6	YGR199W	-0.147470358860623	0.221182126787935
P38349	UBX7	YBR273C	-0.0948129921078866	0.22125682098783
P48524	BUL1	YMR275C	0.111847682864486	0.221533936596302
Q04934	IVY1	YDR229W	0.24157058877757	0.221556936306397
P15624	FRS1	YLR060W	0.0754764877934093	0.221917126912587
Q12199	TIP41	YPR040W	-0.114382101264397	0.222265900950977
P38238	TRM7	YBR061C	-0.161799550514051	0.222328858567898
P10614	ERG11	YHR007C	0.114192690613798	0.222510054187648
Q03705	CGI121	YML036W	-0.137539362981087	0.222803429645632
P38167	ECM21	YBL101C	0.135304523906839	0.222941139925377
P36526	MRPL27	YBR282W	0.180639176758362	0.22306939804085
P40970	LCB2	YDR062W	-0.102835088073007	0.223089742982094
P54787	VPS9	YML097C	0.133696518029151	0.22309522771469
Q04372	TAP42	YMR028W	0.15129474166816	0.223331744470339
P32190	GUT1	YHL032C	-0.227976069447593	0.227337103891203
P33298	RPT3	YDR394W	0.0941744983471402	0.223793103345786
Q08162	DIS3	YOL021C	0.087783007556677	0.224392791141273
P15565	TRM1	YDR120C	-0.0927770971691935	0.224706755135845
P32589	SSE1	YPL106C	0.0681025330103182	0.224943698781405
P05749	RPL22A	YLR061W	0.218605663771449	0.225443328368524
Q06639	RSC3	YDR303C	-0.120672147308888	0.225762400061608
Q06681	YSP2	YDR326C	-0.237150598753804	0.225802151281707
P53972	RCM1	YNL022C	-0.121957946593522	0.22594825272574
P32908	SMC1	YFL008W	0.0990291770330813	0.225976084219683
Q08873	SCP1	YOR367W	-0.201336322578047	0.226800027050434
Q12446	LAS17	YOR181W	0.103869900419976	0.227103297241164
Q08746	RRS1	YOR294W	0.156703984759428	0.22735589675002
P47149	NNF1	YJR112W	-0.115597340387904	0.228516854090997
P40038	PCL6	YER059W	-0.145611092495773	0.229591024179964
P32875	LIP5	YOR196C	0.0803899817639824	0.229625191973914
P32854	PEP12	YOR036W	0.155882773675742	0.233684077279415
P01123	YPT1	YFL038C	-0.151399794433225	0.229814367696607
Q07895		YLR001C	0.221020037445236	0.234092242852241
Q12493	NKP1	YDR383C	-0.190074999232518	0.230153222967115
P29478	SEC65	YML105C	-0.0763418774377875	0.230237827961849
P04710	AAC1	YMR056C	-0.135544607788923	0.230288039499209
P09734	TUB3	YML124C	-0.0858639537157266	0.230322530424284
P41735	CAT5	YOR125C	-0.244351041374962	0.230731816684227
Q07830	GPI13	YLL031C	0.22122638665277	0.235477641300307
P34239	LST4	YKL176C	-0.163039256396754	0.231929914330063
P53951	COG5	YNL051W	-0.173543011345213	0.232574279256423
P16649	TUP1	YCR084C	0.0731609151513197	0.232582907981276
O14455	RPL36B	YPL249C-A	-0.166567068680251	0.232604901740659
P32568	SNQ2	YDR011W	-0.0926511213123504	0.232641713735663
P27697	COQ8	YGL119W	0.254783694474639	0.232657069828852
Q12291	BMT6	YLR063W	-0.134008295264518	0.233392492697894
P53169	YBP2	YGL060W	0.20470020267237	0.233939257120563
P38009	ADE17	YMR120C	-0.161395477920589	0.234192628938892
P50087	MIC26	YGR235C	-0.146531153293932	0.234566116863616
Q04924	GTB1	YDR221W	-0.142537161241609	0.234660532131983
P53743	ESF2	YNR054C	0.0846372290453203	0.235156883750994
P32784	SCT1	YBL011W	-0.117659628505905	0.236359390056288
P43597		YFR016C	0.0711102379629907	0.237713565891906
P53073	EMC4	YGL231C	-0.106159741383625	0.237787807557468
Q01159	CEG1	YGL130W	0.0933914361754589	0.238043426423348
P20486	CKS1	YBR135W	-0.0946675818266378	0.238315478215893
P40515	FIS1	YIL065C	0.0943523353296705	0.238757687553146
P39015	STM1	YLR150W	0.0947604032325913	0.238989882033906
Q05549	HRQ1	YDR291W	0.257124534142836	0.243778415976056
P13587	ENA1	YDR040C	-0.250241182137209	0.30758573408419
Q00816	REG1	YDR028C	-0.103645899110543	0.240295175309271
Q12191	BUG1	YDL099W	-0.132042713063495	0.240305340106395
P21825	SEC62	YPL094C	0.117079880723676	0.240554413551656
P48836	VMA10	YHR039C-A	-0.0993183572124394	0.240931408678458
Q07896	NOC3	YLR002C	-0.0843922828355304	0.241073626265869
Q07938	MEU1	YLR017W	-0.10515775099713	0.24118830305399
O14464	RTC6	YPL183W-A	-0.212613412890825	0.259338456824353
Q12109	WRS1	YOL097C	0.0740283090506004	0.241749792601728
P53219	IMO32	YGR031W	-0.119784393304709	0.242146414578826
P23900	FPS1	YLL043W	-0.180793320740861	0.242367700549733
P10664	RPL4A	YBR031W	0.0760117058624132	0.242462584117159
P05317	RPP0	YLR340W	0.0771973702482711	0.243003610250871
Q12692	HTZ1	YOL012C	0.153928174038104	0.243227451033498
P17505	MDH1	YKL085W	0.113708873683294	0.243456235426248
P39729	RBG1	YAL036C	-0.0932139823922746	0.243585282846778
Q03195	RLI1	YDR091C	-0.0873612678131366	0.243625009543947
P37254	ABZ1	YNR033W	-0.131246740137378	0.24377569762196
P40319	ELO3	YLR372W	0.216738379253954	0.243945350915691
P32473	PDB1	YBR221C	-0.0837310354478973	0.244514819963297
P40053	AIM9	YER080W	-0.0722675686055467	0.244756884002806
P09547	SWI1	YPL016W	-0.173267118949621	0.244760407875665
P40858	MRPL49	YJL096W	0.209725147545591	0.244919926414632
Q3E7A4	CMC2	YBL059C-A	0.161003709396727	0.244962689324879
P50107	GLO1	YML004C	0.123739557376865	0.244971179437537
P43555	EMP47	YFL048C	-0.101117143359698	0.245466268807419
P40516	EFM4	YIL064W	0.113488949778286	0.245830677760408
P32191	GUT2	YIL155C	0.175376047437741	0.246056516897369
Q06523		YPR148C	0.0812081043163388	0.246063429703058
P36534	MRPL40	YPL173W	-0.103627025400957	0.246239990398457
P28000	RPC19	YNL113W	0.0781490064154404	0.246762994017958
P41895	TFG1	YGR186W	0.0914869977731385	0.246792101962873
Q07716	AIM6	YDL237W	-0.0919497249127872	0.246825370799941
P41543	OST1	YJL002C	-0.123641015762527	0.247360717584196
P32387	MRP20	YDR405W	0.133572597047113	0.247425036012066
P32583	SRP40	YKR092C	-0.211039122429135	0.248850778308561
Q12324	YVC1	YOR087W	-0.165466427098742	0.248926956111831
P53937	SWS2	YNL081C	0.170401966099899	0.25094956089947
P32597	STH1	YIL126W	-0.0715316221438513	0.249399073876562
P10659	SAM1	YLR180W	0.0667987570791624	0.249716119485056
P36112	MIC60	YKR016W	-0.118570975200129	0.249970410098155
Q12040		YOR283W	-0.100699408370364	0.250304143371294
P11076	ARF1	YDL192W	-0.107760931323025	0.250653393405606
P0C2J1		YPR158C-D	-0.16185547205145	0.251408228823867
P47133	EMC2	YJR088C	0.10919287977363	0.251454390465511
P53379	MKC7	YDR144C	0.239193027070879	0.253853616025012
Q06245	SEC10	YLR166C	-0.173763491791821	0.252580399205576
P53256	RRP46	YGR095C	0.25085137547018	0.256700203805893
P33753	TRM2	YKR056W	0.122272691554713	0.253366362260425
P32917	STE5	YDR103W	-0.222921067129619	0.266874125136936
Q99369	FSH3	YOR280C	-0.12750145458984	0.254162601276151
P51998	YML6	YML025C	-0.0884268524433409	0.254209406916479
P21538	REB1	YBR049C	0.0857373506047772	0.25427036638281
P06104	RAD6	YGL058W	0.166451619433754	0.263658741049995
P38854	TDA11	YHR159W	0.124000947072922	0.2683999646167
P52286	SKP1	YDR328C	-0.0976713437088108	0.255653341104442
P36100	TFA1	YKL028W	-0.144998630275605	0.255680004182667
Q04728	ARG7	YMR062C	-0.0919520791084523	0.255754523907286
P39944	UBP5	YER144C	0.158827995744851	0.268830075904729
P33417	IXR1	YKL032C	0.0944822684439757	0.256191818434502
Q04600	TMA64	YDR117C	-0.109818392588512	0.256266264305862
P25361		YCR043C	-0.206126661844088	0.262569629017153
P48566	MSB3	YNL293W	-0.192610431293549	0.262688093631358
P05626	ATP4	YPL078C	0.118839473024	0.257237724563798
P38959	VPS41	YDR080W	-0.243592285125501	0.257580165754076
P34087	RPB7	YDR404C	0.232399848258844	0.258210468263295
P25617		YCR016W	-0.198245781793503	0.25943189404004
Q03323	SDC1	YDR469W	0.104970392590626	0.259788866102373
P38177		YBL086C	0.216416528980197	0.259885576700104
Q05778	PBA1	YLR199C	-0.078094388594927	0.25992074637853
P05756	RPS13	YDR064W	0.0618024787253759	0.260120283627493
P38850	RTT107	YHR154W	0.148966679186852	0.260125982338114
P00815	HIS4	YCL030C	-0.126824166700452	0.260150008407715
Q04636	POB3	YML069W	0.0861928405788603	0.260193865954422
[truncated: 1,676 more rows]

## Sheet: comparison_lactate (Fig.S7D)
UniprotID	StdName	SysName	log2 (ubc8_lactate/ WT_lactate)	p-value.adjusted (ubc8_lactate / WT_lactate)
P37303	GLY1	YEL046C	0.93693016999946	5.77460150779978e-10
P37012	PGM2	YMR105C	1.07094039228323	5.3678951480297e-09
P38427	TSL1	YML100W	0.857474781262262	1.16073679644158e-08
Q07653	HBT1	YDL223C	1.52808251452021	1.24714867433602e-08
P06115	CTT1	YGR088W	1.26224560423255	2.29525952236415e-08
P54114	ALD3	YMR169C	1.18082299715744	2.6835223298318e-08
P14065	GCY1	YOR120W	0.986207333955893	2.88889351778074e-08
Q04792	GAD1	YMR250W	1.07865264792791	4.36272031810166e-08
P32623	UTR2	YEL040W	-0.985472016872329	6.23026492266977e-08
P31539	HSP104	YLL026W	0.573925962565568	7.03081693339083e-08
P48015	GCV1	YDR019C	1.20256580717675	7.45491687158717e-08
P22133	MDH2	YOL126C	1.06614300016087	7.50972112609539e-08
P06738	GPH1	YPR160W	0.791118954480062	7.85793384650824e-08
P50263	SIP18	YMR175W	1.20700785929397	0.000134414482319269
Q07688	YPD1	YDL235C	-0.976124803615576	9.91463129192463e-08
Q07923	LOT6	YLR011W	-0.922346475252407	1.18655409674378e-07
P33315	TKL2	YBR117C	1.72636265383012	3.33336614202822e-06
Q06408	ARO10	YDR380W	0.748129013085229	1.63551714826303e-07
Q03104	MSC1	YML128C	1.10241983039132	1.73200552032353e-07
Q06689	INA1	YLR413W	-1.67513940297298	7.55144692206798e-07
Q07651	FMP45	YDL222C	1.11124824052526	2.66198596378994e-05
Q3E841	EGO4	YNR034W-A	1.00101361995513	4.9510434186147e-06
P40463	VHS2	YIL135C	0.921636634376704	3.75920592844744e-07
P37291	SHM2	YLR058C	0.532520901255783	3.91060129767643e-07
P49095	GCV2	YMR189W	1.07916680697577	3.97318410699634e-07
P53315	SOL4	YGR248W	1.02108300347137	4.98829074055581e-07
P41277	GPP1	YIL053W	0.878108927672294	5.0502439018753e-07
Q3E747		YLR363W-A	-0.935897402074108	5.52960186737683e-07
P40339	RFC4	YOL094C	-0.532651450753324	7.16319212838787e-07
P53341;P38158	NA	NA	0.59906931095513	1.16409621580393e-05
P10663	MRP2	YPR166C	-0.784625900197199	5.98363401155361e-06
P40093		YER156C	-0.573771138419268	9.62027133231576e-07
P07258	CPA1	YOR303W	1.79647686660607	1.13869289026343e-06
Q04304		YMR090W	1.37146083662993	1.32899649233378e-06
Q12443	RTN2	YDL204W	1.50413464046617	1.79976418072036e-06
P25379	CHA1	YCL064C	1.02115269194132	1.97220604772601e-06
P39726	GCV3	YAL044C	0.995844687380846	2.08076678274292e-06
P40169		YNL194C	0.824636800507569	0.000552733870718933
P32356	NTH1	YDR001C	0.430800440608841	3.29413110504319e-06
Q00764	TPS1	YBR126C	0.608960578557973	3.30608653891366e-06
P38616	YGP1	YNL160W	1.09314366461462	3.92736051316277e-06
P43542;P0CX13;P0CX12;P53822;P47187	NA	NA	1.10392177141775	7.18639987596848e-06
P53909	AAH1	YNL141W	-0.822782940129294	5.15110707318803e-06
P36159	TRZ1	YKR079C	-0.509100282597053	6.40788356673569e-06
P33307	CSE1	YGL238W	0.636077093586874	6.54329552491408e-06
P22202	SSA4	YER103W	0.948190739298457	6.6684538260966e-06
P34231	FAT3	YKL187C	0.935956494989647	0.000822933342695043
Q03862	ARX1	YDR101C	-0.464303466940482	6.80222846396257e-06
Q12326	GPM3	YOL056W	1.09080888169196	7.11608492855672e-06
P36157	MSA2	YKR077W	1.01059900792848	0.00591704509283686
Q99296		YLR149C	2.55327022982006	5.41246813012077e-05
Q12517	DCP1	YOL149W	-0.514175342131971	7.48642203750104e-06
P07255	COX9	YDL067C	-1.04073989433499	1.23345700326196e-05
P39708	GDH3	YAL062W	1.50411955058653	0.000210285945099661
P38777	FSH1	YHR049W	-0.77901688395432	9.3451748348118e-06
P34226	SKT5	YBL061C	-0.528411457010709	1.04448425207167e-05
Q07897	CMS1	YLR003C	-0.596933287223344	1.06903355274261e-05
P32590	SSE2	YBR169C	0.641857444383628	1.08257282498906e-05
P47137		YJR096W	0.705578779986809	1.09556293371578e-05
P22943	HSP12	YFL014W	0.850917413084829	1.14527233441793e-05
P40165		YNL200C	0.733827580858534	1.15719292644059e-05
Q06151	DCS1	YLR270W	0.483742979009737	1.24555094066407e-05
Q05998;Q08579	NA	NA	1.23095612360324	8.06897800380816e-05
Q08926	UIP4	YPL186C	0.925533580066734	8.38109101250392e-05
Q03503	MAK3	YPR051W	-0.705392088259327	1.38460965481508e-05
P39994		YEL020C	0.670075316123214	3.36776779520587e-05
Q08223	AIM39	YOL053W	1.00800451168885	3.60390558036498e-05
Q04602	VBA4	YDR119W	-0.631063900511904	1.6458715701985e-05
P19658	EXO70	YJL085W	0.564038912534109	1.66832036119363e-05
Q03758	BUL2	YML111W	-0.819107114095381	1.79037503821633e-05
P40308	TGL3	YMR313C	0.656932524704356	1.92050636180965e-05
P15732	UBC5	YDR059C	-0.882644035755849	4.35118348134748e-05
P34240	ZRT3	YKL175W	0.918378274679625	6.86597592784963e-05
P14306	TFS1	YLR178C	0.675088802165359	2.03739534629782e-05
P43577	GNA1	YFL017C	-0.551906146774236	2.12620782679943e-05
P30822	CRM1	YGR218W	0.350953325876166	2.24812027538244e-05
P16547	OM45	YIL136W	0.545515825520134	2.56619268436382e-05
Q99297	ODC2	YOR222W	-0.704534373288329	3.96580266859439e-05
Q07800	PSR1	YLL010C	0.662308665499193	0.000783903494578402
P27472	GSY2	YLR258W	0.494532580528102	3.05186619994393e-05
P38873	KOG1	YHR186C	0.490310316366187	3.0797731187857e-05
P04806	HXK1	YFR053C	0.503215555083635	3.09275050595058e-05
Q12402	YOP1	YPR028W	0.70638735183336	3.10791437661444e-05
P39976	DLD3	YEL071W	0.762838595485427	3.24929170187475e-05
P05745	RPL36A	YMR194W	-0.411394186570192	3.54310413015432e-05
Q07551		YDL124W	0.675177090686411	3.63580788152464e-05
P41819	DIM1	YPL266W	-0.50997940100341	3.65888022283307e-05
P39929	SNF7	YLR025W	0.529916102584519	3.67231197788747e-05
Q08581	SLK19	YOR195W	-0.38629948167506	3.83209299443299e-05
Q12078	SMF3	YLR034C	-0.690044175129394	3.88835709607219e-05
P53925		YNL115C	0.650359859762734	3.92635752788328e-05
P11412	ZWF1	YNL241C	0.416973135746378	4.03755508066766e-05
P38697	IMD2	YHR216W	-0.898920541525893	4.17167732813054e-05
P38885	AIM46	YHR199C	0.518301487847978	4.29260830668601e-05
P25441	RPC53	YDL150W	-1.0052681186585	4.33600984924064e-05
P32644	ECM32	YER176W	0.561462317846107	4.40134467964167e-05
Q8TGU7		YBR126W-A	0.714140291349658	4.77505217940462e-05
Q06512	NOC4	YPR144C	0.529645315466354	4.79432971719495e-05
Q03533	TDA1	YMR291W	0.690124305473717	4.89691167132799e-05
P53184	PNC1	YGL037C	0.512781309212855	4.93311739460279e-05
P14063	MRPL31	YKL138C	-0.615028703942439	7.32949295728242e-05
P53728	CPR8	YNR028W	-0.535328236156378	5.28453844176327e-05
P36059		YKL151C	0.542269191988019	5.42450172213325e-05
P24004	PEX1	YKL197C	0.59008646997809	5.5030875705812e-05
Q06681	YSP2	YDR326C	1.09628626549542	5.51262604716885e-05
P14682	CDC34	YDR054C	-0.635259014350058	5.59920544192793e-05
P31374	PSK1	YAL017W	0.347995791021916	5.90040548019166e-05
P53919	NAF1	YNL124W	-0.607853830901515	5.96350312921285e-05
P38805	RPF1	YHR088W	-0.413312271416487	6.41985740927167e-05
P39522	ILV3	YJR016C	-0.307370590795301	6.72541436259857e-05
P38690		YHR033W	0.435526633088831	0.000289477931626582
P32477	GSH1	YJL101C	1.60553353586886	8.33168582611769e-05
P09620	KEX1	YGL203C	-0.338875280451294	8.59219144315194e-05
Q03769	ENT5	YDR153C	-0.316913451483945	8.79447214936998e-05
P40481	HPM1	YIL110W	-0.740977480564084	8.88792224178202e-05
P05738	RPL9A	YGL147C	-0.337399656011158	8.94262966371802e-05
P36121	RPC37	YKR025W	-0.564372932818685	8.98378089182104e-05
P20676	NUP1	YOR098C	-0.309149884279375	9.2260845812521e-05
P53327	SLH1	YGR271W	0.384328328200279	9.29410480991129e-05
P22354	MRPL20	YKR085C	-0.468417511864523	9.43846067514257e-05
P28272	URA1	YKL216W	0.648001737077777	9.74110382588733e-05
Q12230	LSP1	YPL004C	0.423359663221078	9.74547077900243e-05
Q08773	ISW2	YOR304W	0.506531226097177	0.00010213525183581
P43583	BLM10	YFL007W	0.427019181508641	0.000102712986139054
Q04226	TAF11	YML015C	-0.542106202199573	0.000109021076113501
Q12439		YOR192C-A	0.565255966545681	0.00162543839228826
P53319	GND2	YGR256W	1.6950912712224	0.000411207034751033
P38988	GGC1	YDL198C	-0.574099783378639	0.000112256316672216
Q12513	TMA17	YDL110C	0.497302365935035	0.000114494082844991
P29469	MCM2	YBL023C	0.354006832372601	0.00011739463554003
P40513	MAM33	YIL070C	-0.317210408007881	0.000118310815819148
P05694	MET6	YER091C	0.32580927043551	0.000123471889891977
P53177	TYW3	YGL050W	0.358900562248042	0.000123914297903209
Q08963	LEA1	YPL213W	-0.609924872309804	0.000136839565086984
Q12153	SSF2	YDR312W	-0.853077860748002	0.000183558935146456
Q02969	PEX25	YPL112C	0.411348738257125	0.000144277449087155
P20084	MRPL33	YMR286W	-0.374650329175992	0.000151639685153533
P32462	ERG24	YNL280C	0.743276226023074	0.000269237816712808
P40086	COX15	YER141W	0.451371215847097	0.000154832700849532
P53889	FMP41	YNL168C	-0.401837989239365	0.000157499893816885
P38426	TPS3	YMR261C	0.341543827730636	0.000158049770076185
P32463	ACP1	YKL192C	-0.737844839649114	0.000162112802706751
Q04336		YMR196W	1.05348392323749	0.000169150352422916
P47771	ALD2	YMR170C	0.632198700786756	0.000169524368361468
P08004	CHS1	YNL192W	0.416518262072323	0.000174472832166768
P47135	JSN1	YJR091C	0.397788385146605	0.000179413683392901
Q12525	MHT1	YLL062C	0.501262461849532	0.00132170397365817
Q12335	PST2	YDR032C	0.444869494086468	0.000182359082678821
Q12497	FMP16	YDR070C	0.792618948585591	0.000317088209644286
P89102	SEC5	YDR166C	0.349548361212047	0.000185541772753057
Q04781	RKR1	YMR247C	0.578082568122699	0.000189686925755735
Q02804	ARL3	YPL051W	0.620369080898886	0.000189892789787644
P53009	SCY1	YGL083W	0.562864475063659	0.000191655041070711
P33416	HSP78	YDR258C	0.325123216385226	0.000194492189272413
P53251	SLX9	YGR081C	-0.739966203297168	0.000195661302639554
Q07500	NDE2	YDL085W	0.875223872461483	0.0038107799419579
P42950	GSM1	YJL103C	-0.664900656552582	0.00224527490818201
P06208	LEU4	YNL104C	0.28795536219512	0.000201290270769762
P39714	BDH1	YAL060W	0.44113895891731	0.000205947045928682
P38197		YBL036C	0.319005495675206	0.000210607737529938
P31688	TPS2	YDR074W	0.361011150253642	0.000212334849932049
Q12035	FCF2	YLR051C	-0.398837835612788	0.000212622564188592
P25618	CWH43	YCR017C	0.491474459122905	0.00021325312927636
P53892	IBD2	YNL164C	-0.698105612905028	0.000213497173666227
P27514	PHO91	YNR013C	0.378280352283053	0.000216517082858892
P38203	LSM2	YBL026W	-0.627822889504547	0.000218325158021362
P40164	PSY2	YNL201C	-0.372904359366728	0.000218748461715484
Q06672	TSR2	YLR435W	-0.830399763213773	0.000221979314854059
O13525	COQ4	YDR204W	0.621566354182796	0.000222431251885612
P43579	IES1	YFL013C	0.515344652350201	0.00022885954884535
P16965	STF2	YGR008C	0.884173693260863	0.000230694491825882
P11075	SEC7	YDR170C	0.285567103842428	0.000233509624539843
P16661	ALG1	YBR110W	0.471274472732816	0.000236963024896697
P39106	MNN1	YER001W	1.440560890245	0.000237103701521403
P46669	RPA43	YOR340C	-0.413796393087427	0.000241617663791416
P40582	GTT1	YIR038C	0.363588551508034	0.000249357902529326
P40089	LSM5	YER146W	-0.623321994589588	0.00024938119554922
Q3E7A3		YJL133C-A	0.824300816139566	0.00108991263935007
P38237	UBP14	YBR058C	0.319781617311889	0.000251040214906437
P19812	UBR1	YGR184C	0.295517307730126	0.000258473645073444
P52920	NBP35	YGL091C	-0.775203967623032	0.000259493802555382
Q12466	TCB1	YOR086C	0.277054606999435	0.000261491342550509
P48236		YGR149W	0.547213091222694	0.000579849537748241
Q12108	RTC5	YOR118W	0.484007290265978	0.000269977212560922
P25349	YCP4	YCR004C	0.317278532397346	0.000270459897345275
P35817	BDF1	YLR399C	-0.339302581163203	0.000271228487051747
P33201	MRT4	YKL009W	-0.332468618050168	0.000275304854493492
P39531	RCY1	YJL204C	0.614974539380732	0.000277594249880148
P30775	MRF1	YGL143C	-0.672728207089616	0.000829326562215233
P40007	NOP16	YER002W	0.560504364337913	0.000280075782522436
P53292	MRPS35	YGR165W	-0.44031447141889	0.000280391069296108
Q05778	PBA1	YLR199C	-0.325653464667369	0.000287013173472831
P02829	HSP82	YPL240C	0.500089094715175	0.000290250038925264
Q06479		YLR352W	0.75821120322863	0.000380739377097089
P47054	NUP192	YJL039C	0.30723125157704	0.000308908884792968
Q06336	GGA1	YDR358W	0.485109460597034	0.000309610477045835
Q12044	RCN2	YOR220W	-0.401491096798498	0.000312063719263792
P32791	FRE1	YLR214W	0.839943954008678	0.000316032810337088
Q04170		YDR391C	0.609344373586545	0.000317019908471339
Q12267	SMC4	YLR086W	0.390494590858747	0.000317971809463588
Q08273	HRT1	YOL133W	0.548884336476807	0.000319028574902487
P07278	BCY1	YIL033C	0.390551404093095	0.000319466974035111
P38689	PRS3	YHL011C	-0.354427831710513	0.00032854911417443
P53192	GET1	YGL020C	0.448137042816303	0.000328639408335581
P32805	FZF1	YGL254W	-0.59813758826521	0.00033247890321728
P38071	ETR1	YBR026C	0.331302286556401	0.000333054676110699
P52893	ALT1	YLR089C	0.351120685515749	0.000342117614014948
P40040	THO1	YER063W	-0.290827747768631	0.00034936554426595
P38230	ZTA1	YBR046C	0.477494603020425	0.000357121585975387
P25344	STE50	YCL032W	-0.603059609303639	0.000357777112121301
P40693	RLP7	YNL002C	-0.26872817316152	0.000360851783812591
P42940	CIR1	YGR207C	-0.486240234318043	0.000368733683031183
P57744	TIM8	YJR135W-A	-0.543768085491337	0.000374195943850509
P15646	NOP1	YDL014W	-0.296504397417877	0.000378164253850483
P54839	ERG13	YML126C	-0.253596151577455	0.000384426223080437
Q04432	HSP31	YDR533C	0.553014089693391	0.000394130871834305
P36141	FMP46	YKR049C	0.388475314494269	0.000403816793189366
P40080	VFA1	YER128W	0.812734805556605	0.000528347795965024
Q12074	SPE3	YPR069C	0.295291092038468	0.000427351208609472
P38992	SUR2	YDR297W	0.559157550547759	0.000429972364113566
P47057	SNX4	YJL036W	0.28562321569844	0.000433875250659647
P53874	UBP10	YNL186W	-0.418112011381201	0.000437669562924517
Q12132	USV1	YPL230W	0.535723081310802	0.00118022366282099
Q12680	GLT1	YDL171C	0.272705267868002	0.000444773431655276
P53742	NOG2	YNR053C	-0.319003157407334	0.000444903009891997
P39722	GEM1	YAL048C	0.35291768270692	0.000701008099849909
P40168		YNL195C	0.880968895790943	0.00993084271544157
P13856	RSR1	YGR152C	-0.385756442458288	0.000452693562421672
P01094	PAI3	YMR174C	0.954328815776091	0.00123288538490964
Q05937	STP3	YLR375W	-0.632085837983887	0.000464974505059762
P32904	MRPL6	YHR147C	-0.551940815118606	0.00048232451651789
P53730	ALG12	YNR030W	0.552290773616509	0.000503108796277034
P37263		YCR087C-A	-0.625197765886519	0.000515882484464108
P40106	GPP2	YER062C	0.691738112559431	0.000525052337214087
P36114		YKR018C	0.352349572970535	0.000541662240250472
P38821	APE4	YHR113W	0.427980584868003	0.000543001905083694
P38086	RDH54	YBR073W	-0.521958739429035	0.000550604553452297
P24279	MCM3	YEL032W	-0.305524958476994	0.000554366880340292
P36014	GPX1	YKL026C	1.62685649260007	0.00632816117118921
Q07648	DTD1	YDL219W	-0.578091503478372	0.000567130659992078
P39076	CCT2	YIL142W	-0.256670904074834	0.000578223921816026
P27476	NSR1	YGR159C	-0.368718972168342	0.000582980886306662
Q02457	TBF1	YPL128C	-0.557255314448764	0.000584556407151995
P32793	YSC84	YHR016C	0.3318801882839	0.000584867218716744
P20484	MAK11	YKL021C	-0.411451555222207	0.0005857374151538
Q04894	ADH6	YMR318C	-0.383967263443243	0.00059108452189066
P53924	DMA2	YNL116W	-0.493650090603133	0.000592763452216835
Q99288	DET1	YDR051C	0.353307513326467	0.000596795289097803
Q12425	ISA2	YPR067W	-0.777140116283842	0.000600079384415575
Q03016	GIP3	YPL137C	0.986231954723969	0.000604896348206219
P38881	NVJ1	YHR195W	0.430929808452063	0.00153081938850777
Q03290	TFB3	YDR460W	-0.452115579915105	0.000623114522916001
Q03667	MIX17	YMR002W	-0.463592548113304	0.000623624677862363
P38013	AHP1	YLR109W	0.428599117706362	0.000625895023346144
Q08954		YPL199C	-0.328956533218872	0.000631676360252556
P11938	RAP1	YNL216W	-0.358297720875701	0.000639825994954838
P46988	PFD1	YJL179W	-0.298300236003442	0.000648782246174321
P34248	YPF1	YKL100C	0.311011063515075	0.000660489701465678
Q12451	OSH2	YDL019C	0.242808163002262	0.000661797815872964
P38716		YHR112C	0.531631538133098	0.000671789314200748
Q01080	RPA49	YNL248C	0.253065800368599	0.000685917437977862
P40363		YJL068C	0.337308928739663	0.000695425146145356
P04076	ARG4	YHR018C	-0.287582603579175	0.000700588202126979
P10592	SSA2	YLL024C	-0.378257315865028	0.00070803647841919
P38115	ARA1	YBR149W	0.331576212965452	0.000710588552882539
Q08920	CBC2	YPL178W	-0.774773424699426	0.000717414431148553
P35719	MRP8	YKL142W	0.332867660005	0.00073123645294788
P50861	RIB4	YOL143C	0.593547943465403	0.000736974545949119
P43616	DUG1	YFR044C	0.248893549720016	0.000740515043657354
P53604	MSO1	YNR049C	-0.34662330711997	0.000745929480908186
P38151	PBP2	YBR233W	-0.485020154371782	0.000758769518761949
Q07949	PSR2	YLR019W	-0.636967531848597	0.000767016900809518
P34247	UTP11	YKL099C	-0.435307089908889	0.00080174531641451
Q08817	SOG2	YOR353C	0.44597375701661	0.000806400495306735
P18852	STE18	YJR086W	0.596748186369283	0.000810019321991714
P32570	SRB6	YBR253W	1.19671876976583	0.00148962109888748
P10507	MAS1	YLR163C	-0.279719646461743	0.000817953606173418
P38913	FAD1	YDL045C	0.752445715103011	0.00351212906862741
P43587	YPI1	YFR003C	0.397615259138288	0.000838689825937923
P39713	BDH2	YAL061W	0.972287421170066	0.00359506475273545
P38929	PMC1	YGL006W	0.373933705950677	0.000880157723191889
P36044	MNN4	YKL201C	-0.762505984486396	0.00130186362921328
P07245	ADE3	YGR204W	0.267109256725444	0.00090813489264158
Q08959	PGC1	YPL206C	0.446445090915155	0.000909505227434072
Q02256	YVH1	YIR026C	-0.302145999312067	0.000929850004472405
P09938	RNR2	YJL026W	0.349823286449602	0.000931919721408141
P32604	FBP26	YJL155C	0.415555523244727	0.00093246051945364
P38691	KSP1	YHR082C	0.486465936860991	0.000936797108596561
P38792	RRP4	YHR069C	-0.274160974971757	0.000939641127649134
Q07623	NOP6	YDL213C	-0.393687882075234	0.000958327708310495
P40005	GIM4	YEL003W	-0.649032300605782	0.000959018789757865
P38271	OPY1	YBR129C	-0.537198158094728	0.000963014683185189
P00498	HIS1	YER055C	-0.281419959742397	0.000965901947905635
P54858	DOS2	YDR068W	-0.275198032088952	0.000968993839227974
Q06152		YLR271W	0.493375786343794	0.0039206046539847
P30657	PRE4	YFR050C	-0.355727024927319	0.000991148460558273
Q03338	PRP3	YDR473C	-0.412488610371671	0.00100805671822133
Q8J0M4		YCL012C	0.483597600003797	0.00101233794229808
Q05031	DFG5	YMR238W	0.636971515052998	0.00120524053909439
P47176	BAT2	YJR148W	0.576650358058693	0.00102199860468585
P53903	PGA2	YNL149C	-0.639099704689393	0.00102652303594502
P37293	NAT2	YGR147C	0.423628107699301	0.0010383359452841
P48524	BUL1	YMR275C	0.365067687456698	0.00106474572744176
P53848	FOL1	YNL256W	0.451540974225612	0.001071303875575
P39944	UBP5	YER144C	0.46902651073837	0.00311705877626505
P13517	CAP2	YIL034C	-0.269676228860718	0.00109243827185793
Q05874	NNT1	YLR285W	-0.706149679891414	0.0011357837043391
Q05498	FCF1	YDR339C	-0.894671658989072	0.00164205065661382
Q06494		YPR127W	0.439914249763664	0.00116703766660756
P39969	BOI2	YER114C	-0.345700780274257	0.001181911471773
P48563	MON2	YNL297C	0.310627022851659	0.00121237980189022
P53051	IMA1	YGR287C	0.939572854130923	0.00346122396342312
P46970	NMD5	YJR132W	0.526196539744067	0.001253836335483
Q05812	MSC3	YLR219W	0.350675279101004	0.00126855815085345
Q04500	UTP14	YML093W	-0.342959955580348	0.00126869814403821
P54838	DAK1	YML070W	0.250626401591084	0.0012814689557254
P47166	SGM1	YJR134C	0.371885754769981	0.00128608779157033
P25373	GRX1	YCL035C	0.33872423552754	0.00128708241436609
Q04223		YMR130W	-0.509868479836733	0.00129516161382565
Q06616		YPR174C	-0.618055791851503	0.00152667579063473
P40498	UTP25	YIL091C	-0.252883018501947	0.00131488123453719
P0C2J1		YPR158C-D	-0.549641004198001	0.00131922279521029
Q03558	OYE2	YHR179W	-0.394252921598778	0.00134075848510223
P06781	RHO2	YNL090W	-0.569300938177573	0.00134774518938311
P47076	RPC17	YJL011C	-0.477765594870785	0.00134784999485504
P40081		YER134C	0.344970734277162	0.00136689938895093
Q06344	ESF1	YDR365C	0.352004586401922	0.00136718157040084
P53076	VID30	YGL227W	0.449858939331403	0.00136933761431849
Q12123	DCS2	YOR173W	1.02649933851303	0.00136948575252356
P36152	DRE2	YKR071C	-0.304364218130047	0.00137953587206579
P00572	CDC8	YJR057W	-0.363135290037743	0.00162193140811519
P47031	IML2	YJL082W	0.433404755407526	0.00140803760174128
P38779	CIC1	YHR052W	-0.302513482128585	0.00141045634293291
P40030	ERG28	YER044C	0.588457406027139	0.00165728067109176
P53859	CSL4	YNL232W	-0.305584972533556	0.00142536753459268
Q12102	CFT2	YLR115W	0.721806286698726	0.00143114710022353
Q06625	GDB1	YPR184W	0.588142410183806	0.00199997407002266
P15992	HSP26	YBR072W	1.22437326558348	0.00148608867187112
Q08647	PUS7	YOR243C	-0.314361782133666	0.00151168649038504
Q12363	WTM1	YOR230W	0.31980345386361	0.0015141962316105
P53824;P43545	NA	NA	0.392289475956602	0.00320052804823915
P25389	KCC4	YCL024W	-0.55471501617286	0.0015643131515473
P42826	XKS1	YGR194C	0.353494391288095	0.00158407186880401
P53912		YNL134C	0.302786691791155	0.00158492517545255
P38070	YPK3	YBR028C	-0.435685690594735	0.00158747787391968
Q04947	RTN1	YDR233C	0.270867129401189	0.0015876284106368
Q99369	FSH3	YOR280C	-0.423458475762086	0.00163373972645322
P43568	CAK1	YFL029C	-0.745417829857477	0.00163843616919809
P47112	TAH11	YJR046W	0.466690790198587	0.00226528142501469
P25348	MRPL32	YCR003W	-0.572188094618983	0.00228907400457159
P39113	CAT8	YMR280C	0.287548486001068	0.00340364606225777
Q99186	APM4	YOL062C	-0.459621435619979	0.001681495754614
P36132	KAE1	YKR038C	-0.59940397741612	0.0016906118130446
P50110	SAM37	YMR060C	-0.400503469778894	0.00169499782725586
Q3E7C1	TFB5	YDR079C-A	-0.623962508898604	0.00169502555482921
P47093	LSM8	YJR022W	0.644703533105574	0.00232061310345446
P53064	RTF1	YGL244W	0.242099297416615	0.00171149341477109
P53130	GPG1	YGL121C	0.706657764051439	0.0112738954142281
P20486	CKS1	YBR135W	-0.300970811265636	0.00173770829572475
Q05635	RNH202	YDR279W	0.413885577887648	0.00174062328132441
P40051	ICP55	YER078C	-0.473275164405202	0.00175462741177685
Q99257	MEX67	YPL169C	0.282953357216638	0.00176750989644936
P01120	RAS2	YNL098C	0.363135015028181	0.00177024104794178
Q12386	ARP8	YOR141C	0.322926126794904	0.00177770065375517
Q12117	MRH1	YDR033W	0.234823848440946	0.0017936612464755
P39990	SNU13	YEL026W	-0.359440957653341	0.00179711958789294
P38143	GPX2	YBR244W	-0.316717777018585	0.00181100964151866
Q12339	UTP23	YOR004W	0.346429591173052	0.00184057004970394
Q04225	RRB1	YMR131C	-0.256064331960719	0.00185691334979861
P33324		YKL091C	0.522064876830573	0.00193504421543525
Q12220	DIP2	YLR129W	-0.3016829993534	0.00196031307948585
P32451	BIO2	YGR286C	0.503767876420429	0.00197627077715982
P40056	GET2	YER083C	-0.493588589572035	0.00197753288461585
P32771	SFA1	YDL168W	0.255644406844475	0.00197775041151274
P24031	PHO3	YBR092C	-0.384952278028535	0.00198265161007059
P40218		YMR147W	0.577046791226461	0.00229336876232736
Q06224	YSH1	YLR277C	0.544206572850008	0.00199888108460006
Q02725	VTC3	YPL019C	0.349943832063772	0.00201206437840411
P47190	PMT3	YOR321W	0.435169316227896	0.00205222708609708
P47150	RSM7	YJR113C	-0.386833343815471	0.00206733061123863
Q07468	VAM6	YDL077C	-0.376257530548749	0.00207231456831078
P40017	YAT2	YER024W	0.570116151250613	0.0124517076355612
P14904	APE1	YKL103C	0.258637033835839	0.00208286475214771
P41920	YRB1	YDR002W	-0.229440882429721	0.00208605944261456
P33895	NUF2	YOL069W	0.396165816651042	0.00209806756658312
P40055	UTP7	YER082C	-0.282327573809951	0.00210920465102167
P38175	MRP21	YBL090W	0.356110183801743	0.00213166812990749
P32333	MOT1	YPL082C	-0.215742703370022	0.00213375813525408
P29704	ERG9	YHR190W	0.275731613553081	0.00214220927041025
P35195	ECM15	YBL001C	0.494358139423518	0.0021704673253793
P53314	CPD1	YGR247W	-0.464450674152047	0.00293372318707255
P0CT04	PBI2	YNL015W	0.342501673892563	0.00220087030920381
P53952		YNL050C	-0.663095468052127	0.00253242752337266
P16862	PFK2	YMR205C	0.219360893109254	0.00223649374169924
Q07844	RIX7	YLL034C	0.338700798096681	0.00225859453694392
P38523	MGE1	YOR232W	-0.301022488112977	0.00225962895566078
P41903	TES1	YJR019C	0.785696232081584	0.00303336540275839
P49018	GPI8	YDR331W	-0.593052501043282	0.00233696333473027
Q08096	RCL1	YOL010W	0.225776729483108	0.00233963594887466
P23493	MBR1	YKL093W	0.701449873914925	0.00451845349630756
P39008	POP2	YNR052C	-0.40406222541213	0.00240871724606178
Q12463	TRM11	YOL124C	-0.285761814645458	0.00242136893062297
P18544	ARG8	YOL140W	0.473594944335215	0.00242198984363451
P10081	TIF2	YJL138C	-0.222930016342474	0.00246365774263392
P10081	TIF1	YKR059W	-0.222930016342474	0.00246365774263392
Q08208	NOP12	YOL041C	-0.281739384190338	0.00246751818705621
P42846	KRI1	YNL308C	-0.251233783262453	0.00247937028413113
P04456	RPL25	YOL127W	-0.246853437220629	0.00249359738499569
P36135	UTH1	YKR042W	-0.313266724223748	0.00252138495265624
P53168	DUO1	YGL061C	-0.479352049346094	0.00253079709172572
P38256		YBR096W	0.316230515943079	0.00253942986221195
P40036	GIP2	YER054C	0.600474047936896	0.00749606916366782
P47148		YJR111C	-0.431658863799754	0.00256166408123523
Q12080	NOP53	YPL146C	-0.310641115313999	0.00258076561989726
Q03705	CGI121	YML036W	-0.399198460791123	0.00260364825228333
P53868	ALG9	YNL219C	0.361761978655846	0.00264264051488476
P36147	PAM17	YKR065C	-0.550244524081155	0.00264891999737804
Q99312	ISN1	YOR155C	0.432449624208548	0.00267269609797114
Q02046	MTD1	YKR080W	0.372217485713996	0.00267740098336739
P37302	APE3	YBR286W	0.268479812200219	0.00267752087190672
P12383	PDR1	YGL013C	0.314963873612086	0.00269652464192847
Q12500	AVL9	YLR114C	-0.289079702037476	0.00270361921904064
P09959	SWI6	YLR182W	0.297345367735922	0.00272244247173612
P38915	SPT8	YLR055C	-0.34894783829504	0.00273943026494687
Q03761	TAF12	YDR145W	-0.18407032936301	0.00279846621388141
P38874	IKI1	YHR187W	-0.333781950561047	0.00280346974169533
Q08492	BUD21	YOR078W	-0.391909409336673	0.00325197554404456
Q04409	EMI2	YDR516C	0.271138165500165	0.00288993139494849
P52918	MSN5	YDR335W	0.274572475951221	0.00289882123001865
Q04228	UBX2	YML013W	-0.33080805670502	0.00290755774071114
P14680	YAK1	YJL141C	0.506792176548913	0.00293793057348905
P05319	RPP2A	YOL039W	-0.449893351263491	0.00294113625735296
P50094	IMD4	YML056C	-0.228883341770583	0.00300341161526199
P32857	PTM1	YKL039W	-0.428014594623175	0.00300847484902909
Q04599	MRPL1	YDR116C	-0.348163870866433	0.00305329397409601
Q03012	SPP1	YPL138C	0.576988558322839	0.00396978305271725
P39523	EPO1	YMR124W	0.407533669597367	0.00306336781220318
Q12019	MDN1	YLR106C	0.180637822479341	0.00307696132502944
P53220	TIM21	YGR033C	0.41137825682144	0.00308559038466839
P47029	ALY2	YJL084C	-0.234582553707796	0.00309625331154621
P36120	DBP7	YKR024C	-0.348090518498029	0.00311047349511841
P38747	OTU2	YHL013C	-0.340057869927172	0.00311524147651187
Q03772	CWC15	YDR163W	0.3298501129584	0.00311754661444518
P47177		YJR149W	-0.480808309254307	0.00564764017291176
P39078	CCT4	YDL143W	-0.199435364314027	0.00315245907880802
Q08816	TFB6	YOR352W	0.366864647625551	0.00316976074739593
P39968	VAC8	YEL013W	0.222377922662563	0.00317456357529981
Q08723	RPN8	YOR261C	-0.301323339413234	0.00319293753692633
P40462	TMA108	YIL137C	0.201425214945594	0.00321576761891371
P32657	CHD1	YER164W	0.232014170712354	0.0032207814543452
P07266	MRS1	YIR021W	-0.837451330110518	0.00364548743545917
P54885	PRO2	YOR323C	-0.259520824455912	0.00323218959431983
P38715	GRE3	YHR104W	0.214662725687674	0.00324977847093136
P42936		YGR201C	1.1002690900409	0.0158654676079533
Q12285	MDY2	YOL111C	-0.295961631427655	0.00327299094453947
P12962	CAF20	YOR276W	-0.293400581511193	0.00337295168307437
P38778	SMF2	YHR050W	-0.408511126303939	0.0060098562085653
P25371	ADP1	YCR011C	0.270479178714037	0.00340379663803594
P53628	SNF12	YNR023W	0.324914713473252	0.0034183173920403
Q03612		YER138C	-0.444889724904726	0.00345809842668023
P43321	SMD3	YLR147C	-0.497784514552198	0.00345916979442883
P41921	GLR1	YPL091W	0.214568813174864	0.00347617553499469
P38809		YHR097C	0.332863800500014	0.00348461888725032
Q99321	DDP1	YOR163W	0.199764301527299	0.00348875852070745
P38720	GND1	YHR183W	0.282423005358432	0.00349447664651623
P34216	EDE1	YBL047C	0.281663846866753	0.00352929008673179
Q02884	ELP4	YPL101W	-0.327784189403268	0.00355300646999411
P36017	VPS21	YOR089C	-0.285097201108314	0.0035548627738835
P34222	PTH2	YBL057C	-0.557653962018492	0.00355826421262544
P38162	MIX23	YBL107C	0.288427731038613	0.00531278201760838
P50101	UBP15	YMR304W	0.282565358426687	0.00358947221878958
Q05775	HCR1	YLR192C	-0.238518846394747	0.00365260182787063
P38202		YBL028C	-0.520087572688912	0.00365991319248296
P23255	TAF2	YCR042C	0.263413071312055	0.00366867026951898
P40006	IRC22	YEL001C	-0.442432822317887	0.00371565362712072
P38798	NMD2	YHR077C	0.305083139785921	0.00371582340023576
P53720	SMM1	YNR015W	-0.368827895400177	0.00371810922361212
P34227	PRX1	YBL064C	0.358275147828351	0.00376740654555439
Q12028	APL4	YPR029C	0.233214634616623	0.00379014321557902
Q03201	RSM10	YDR041W	0.38683317367639	0.00380525886791999
P38297	FZO1	YBR179C	-0.285294729569497	0.00380978363862391
P53918	ESBP6	YNL125C	-0.444401545743634	0.00486654180716175
Q12377	RPN6	YDL097C	-0.27050486307715	0.00382022129816781
P38719	DBP8	YHR169W	-0.477509472724599	0.00384718854125009
P53266	SHY1	YGR112W	0.430547880619674	0.00669985494113257
Q12008	GPM2	YDL021W	0.604378526961391	0.00390278249537204
P32794	AFG2	YLR397C	-0.352217328488138	0.00396507771685203
P48232	SNN1	YNL086W	0.457690090032816	0.010180211993228
P39002	FAA3	YIL009W	-0.360267393468394	0.00404520444084645
P25569	GID7	YCL039W	0.728045296995852	0.00455919516645934
P32379	PUP2	YGR253C	-0.306004416854343	0.00408225095691386
P53040	TAF6	YGL112C	0.234232893696955	0.00408526717021496
P54113	ADE16	YLR028C	0.215677066445149	0.00409465698005835
P38789	SSF1	YHR066W	-0.393298097499773	0.00412813401735508
Q03407	PKH1	YDR490C	0.374745321453858	0.00413205565999206
Q06508	LOA1	YPR139C	0.347310047790355	0.00415437880006178
Q03790	NUP53	YMR153W	-0.331660585765881	0.00416138333193391
P40350	ALG5	YPL227C	-0.477008710159033	0.00424387427814492
P38314	SDS24	YBR214W	0.393108779254181	0.00427105532551736
P28777	ARO2	YGL148W	-0.21902144201875	0.00427325333547702
Q03768	GIR2	YDR152W	-0.264243879091961	0.00428565573074766
Q12164	POM33	YLL023C	0.399541547955618	0.00430327643362806
Q03661	ESC1	YMR219W	0.250031695521152	0.0043144648422215
Q06147	LCB5	YLR260W	0.390343081578283	0.00485625277890229
Q05979	BNA5	YLR231C	0.293271164915573	0.00436744481194232
P32495	NHP2	YDL208W	-0.385908067776754	0.00437140611272774
P53265		YGR111W	0.306079851713449	0.00442687441247407
P53941	IMP4	YNL075W	-0.234976784936741	0.00442761355832598
Q3E754	RPS21B	YJL136C	-0.212456683445886	0.00446433588620405
P39516	RPS14B	YJL191W	0.197296106586634	0.00448376986252248
P32770	NRP1	YDL167C	-0.291569348892093	0.00448999479863495
P04051	RPO31	YOR116C	-0.196760546472145	0.0045104895984679
P32769	HBS1	YKR084C	0.278572312863687	0.00452572854701891
Q02933	RNY1	YPL123C	0.339564044783479	0.00657717162027038
P20133	BET2	YPR176C	-0.561358608444049	0.0193068846233353
P36056	RSM22	YKL155C	0.508507026952607	0.00583601170634726
P40348	RFC2	YJR068W	0.209228774402785	0.00467068889259813
Q06489	MRI1	YPR118W	-0.200642127009417	0.00472369411513399
P38869	SVP26	YHR181W	0.316015058427379	0.00477246378180541
P10591	SSA1	YAL005C	0.233450390429034	0.00478169646282184
Q05567	DPL1	YDR294C	0.315857719773131	0.00480907980825497
P32454	APE2	YKL157W	0.197495529873148	0.00482456513004534
P25334	CPR4	YCR069W	-0.420749486439895	0.00536877798785152
P47136	BUD4	YJR092W	-0.356373970622617	0.00485242224908772
P38741	RIM4	YHL024W	-0.575090335401889	0.0148917305459317
Q04748	SOV1	YMR066W	-0.429016757816118	0.0081131445258187
P38333	ENP1	YBR247C	-0.242116322880005	0.00494776917473539
P25365	SED4	YCR067C	0.259038775795965	0.00495079358239096
P0CX24;P0CX23	NA	NA	-0.253798662217335	0.0049606570835318
P33892	GCN1	YGL195W	0.166684259676956	0.00497982400298069
P08678	CYR1	YJL005W	0.341569848740967	0.00500115085742622
P39704	ERP2	YAL007C	-0.340049308296148	0.00502268128372199
P46969	RPE1	YJL121C	-0.299336731418382	0.00504737331619261
P26263	PDC6	YGR087C	1.42373657820006	0.00562551042478254
P39676	YHB1	YGR234W	-0.265122342432583	0.00509593394352173
P81450	ATP18	YML081C-A	-0.408043383975549	0.00511120585607047
P25039	MEF1	YLR069C	-0.347676585364489	0.00514343515993722
P42935	ELP2	YGR200C	-0.2766056689015	0.00518636505978412
P36118	NTR2	YKR022C	0.682033197911313	0.0451618866033311
P00425	COX5B	YIL111W	-0.479172132220786	0.00523285869463055
Q12251		YPR011C	-0.310225839694571	0.0206501794078411
Q04120	TSA2	YDR453C	0.705662601116522	0.00581713284235915
P35718	RPC25	YKL144C	-0.33866091624628	0.00592710718669194
Q07938	MEU1	YLR017W	-0.285490465234894	0.00540489097515865
P32351	IMP2	YIL154C	0.405565411703346	0.00544913424855008
Q12025		YDR056C	-0.545407651082087	0.00547877970465719
P38819	ERP5	YHR110W	0.505141358579348	0.00550204683934965
Q03702	CCE1	YKL011C	0.401569286806279	0.0090675312996356
P01119	RAS1	YOR101W	-0.36661038508711	0.00560412281441128
Q12118	SGT2	YOR007C	-0.211242668903857	0.00563717399233809
P52593	NUP188	YML103C	0.239020913180763	0.00564090763501733
Q03388	VPS72	YDR485C	0.514671465217805	0.00564361068613004
P36105	RPL14A	YKL006W	-0.7821413921782	0.00565681673317599
P40515	FIS1	YIL065C	0.252049742703612	0.00578583576685586
P32389	MET4	YNL103W	-0.412064909166897	0.00586165318415531
P15700	URA6	YKL024C	-0.214386215313787	0.00588436712447253
P39009	DUN1	YDL101C	-0.38762472288688	0.00595183115973342
P14908	MTF1	YMR228W	-0.273414000985614	0.00599537041612692
P26637	CDC60	YPL160W	0.187599510277312	0.00600745226201509
P07284	SES1	YDR023W	-0.210913540417934	0.00608509719962765
P47061	VPS53	YJL029C	0.251932616579875	0.00609941568482525
P32831	NGR1	YBR212W	0.466906122726254	0.00620259420573281
P38210	LDB7	YBL006C	-0.474954737385698	0.00620923758251968
P38797	PTC7	YHR076W	-0.264202643785833	0.00626828440481695
P25042	ROX1	YPR065W	-0.739110396190636	0.00689927607655211
Q12017	PLP2	YOR281C	-0.187974585386268	0.0062876943622452
P23642	VAN1	YML115C	0.321153670215192	0.00631661386974984
P36040	ADD66	YKL206C	-0.428956877699495	0.00632033259965582
P10356		YER152C	0.375629764806295	0.00637847279126094
P53141	MLC1	YGL106W	-0.194444238590375	0.0063799585160231
P24783	DBP2	YNL112W	-0.237360766322748	0.00638802968191969
P53111	ARI1	YGL157W	0.680105454833708	0.00707268364920311
P15790	CKA1	YIL035C	-0.30830901597923	0.00644559656873807
P53066		YGL242C	-0.239861929857735	0.00644848752017895
P38884	AIM18	YHR198C	0.300463135481039	0.00647696222143326
P32366	VMA6	YLR447C	-0.253196412967409	0.00649499360582922
P05318	RPP1A	YDL081C	-0.66958475222269	0.00653544088343632
P29311	BMH1	YER177W	0.205196672720838	0.00656803115859544
P00924	ENO1	YGR254W	0.256422576736298	0.00658997257984115
P54070	KTR6	YPL053C	-0.269188830918878	0.00665107612978212
Q04767	TVP18	YMR071C	0.414335502330985	0.00665151415253575
P36151		YKR070W	0.26247772841641	0.00667662837720842
P25043	PUP1	YOR157C	-0.25870998194657	0.00668221729082417
P33328	SNC2	YOR327C	-0.271418034599641	0.00684977428871408
Q12033	RIM20	YOR275C	0.399926310248276	0.00755401019388321
P25659	FUB1	YCR076C	-0.285311574009441	0.0107971197655475
P40360	ARG2	YJL071W	0.612772176567894	0.0109066961284693
P53311	MPC3	YGR243W	2.00084292387483	0.0338122264506652
P0CX73;P0CX72;P0CX71;P0CX70	NA	NA	0.727590879071904	0.00716852025269742
P33322	CBF5	YLR175W	-0.179589308446911	0.00717738969111266
P36035	JEN1	YKL217W	0.541611642186382	0.012979688864877
Q12328	TIM22	YDL217C	-0.349241643581223	0.00977030661194753
P27616	ADE1	YAR015W	0.227352089151864	0.00718549041577697
P40541	IRR1	YIL026C	0.248673034570114	0.00720581603721081
P49367	LYS4	YDR234W	-0.236200289617312	0.00730685471306879
P43611	OSW7	YFR039C	0.331050349160193	0.00739380324347256
P38072	SCO2	YBR024W	0.279814683710146	0.00895329921335526
P17065	SEC2	YNL272C	0.379478838352735	0.00741408932409638
Q12196	RIO1	YOR119C	-0.2595663269515	0.0074157305937573
P48231	TCB2	YNL087W	-0.346412573472502	0.00746904226116191
Q04438	SPG4	YMR107W	1.92980170751355	0.0253722323895598
Q12333	FRE7	YOL152W	0.889921954976032	0.0116663093412286
Q12012		YOR289W	-0.314406544159709	0.0116877151441209
Q92317	NCB2	YDR397C	0.367855268306563	0.00765396452602062
Q12404	MPD1	YOR288C	-0.31919598877759	0.00769144268628011
O13585		YPR089W	0.262253291940237	0.00770132169186311
P35179	SSS1	YDR086C	-0.382037161503487	0.00773754449347974
Q05911	ADE13	YLR359W	0.207477800594855	0.0077584899892811
Q07362	PBP4	YDL053C	-0.225095374701407	0.00776420763601277
Q99190	TSC13	YDL015C	0.294054766665834	0.00779154621259087
P22137	CHC1	YGL206C	0.186818977542064	0.00782176304579573
P41834	UFE1	YOR075W	0.544153904899606	0.00855730736501423
P39515	TIM17	YJL143W	-0.504763529768198	0.0078486748109183
P53877	IPI3	YNL182C	-0.273167473983097	0.00793050495611275
Q10740	LAP2	YNL045W	0.208886567255053	0.00793977063117777
P53940	APJ1	YNL077W	-0.421249902876291	0.00800539729216331
Q08438	VHS3	YOR054C	0.314223277796348	0.00803579324585983
P53865	CNM67	YNL225C	0.263971681708419	0.00808573184385751
Q12306	SMT3	YDR510W	0.233391023933876	0.00813960339236977
P80667	PEX13	YLR191W	-0.337994587858592	0.00889392686520222
P39005	KRE9	YJL174W	-0.402104449896505	0.00890449470196666
Q08548	ALE1	YOR175C	0.246979710934536	0.00818572553939382
P38325	OM14	YBR230C	0.43323019662807	0.00819141790690818
P12868	PEP5	YMR231W	-0.306270432061524	0.00832438927488251
P38069	MNN2	YBR015C	0.178147641600095	0.00832674751419821
P43122	QRI7	YDL104C	-0.496468617441305	0.0127066748800434
P39996	GTT3	YEL017W	-0.363589022267593	0.00839864608143571
P50089		YGR237C	0.345707071033058	0.00846333998888898
P53234		YGR053C	0.486816977988472	0.037034008293647
P40098	FMP10	YER182W	-0.425310751664739	0.00855649329677702
Q03063	DIG1	YPL049C	0.236757097710736	0.00862542751189206
P38791	DYS1	YHR068W	-0.19218162890423	0.00864294554387994
P15019	TAL1	YLR354C	0.173713914719023	0.00865172131092427
P21524	RNR1	YER070W	-0.224943662924463	0.00865925158647827
P38862	ATG7	YHR171W	0.541641910202816	0.0103614806867214
P36013	MAE1	YKL029C	-0.306917135003907	0.00871073180761661
P48510	DSK2	YMR276W	-0.24688921721879	0.00871661889304295
Q02948	VPS30	YPL120W	0.441528941929789	0.00880157670002195
P36533	MRPL39	YML009C	-0.403548297041862	0.0107481229113896
P38879	EGD2	YHR193C	-0.21031100152355	0.00903257318149623
P33749	MSN4	YKL062W	0.596923310667485	0.0090541405493996
Q12166	LEU9	YOR108W	-0.335710899009413	0.0090589964291992
P38786	RPP1	YHR062C	-0.20815390066506	0.00907182416654051
P32473	PDB1	YBR221C	-0.21037698594715	0.00910442575611914
P24384	PRP22	YER013W	0.41389321350292	0.00918879410908334
P38205	NCL1	YBL024W	-0.163326258244791	0.00923496723527737
P05748	RPL15A	YLR029C	-0.17591080822595	0.00925078115079814
Q06405	ATP17	YDR377W	-0.246305758972312	0.00927072654354712
P53753	DSE4	YNR067C	0.43795496827244	0.00935700150721298
Q06678	MRPL35	YDR322W	-0.26316601805981	0.00937986926912974
P15108	HSC82	YMR186W	0.159411100068418	0.00938554525022759
P38928	AXL2	YIL140W	-0.350736418540407	0.00939302098635238
P38620	PRS2	YER099C	0.34380096140654	0.00940504607344301
P06100	CDC36	YDL165W	-0.405176711502843	0.00952784316214384
Q12452	ERG27	YLR100W	0.257651717131345	0.00954621268096578
P0CX58;P0CX57;O74302;Q12470	NA	NA	-0.63924528259998	0.00957641092881288
Q06005	LIP2	YLR239C	-0.430363741541473	0.0142756946948143
P32524	PRP21	YJL203W	0.333544771672031	0.00965750456322908
P00899	TRP2	YER090W	0.180828944801899	0.00967303880285941
Q12179		YPL245W	-0.555678832735673	0.00969125921644834
P40466	FKH1	YIL131C	-0.273920084258236	0.00971346491193579
P0C2I9		YPR137C-B	-0.169011402803385	0.00976831031662745
P47154	STE24	YJR117W	0.204211957958588	0.009774725395531
P53174;P39551	NA	NA	-0.313755478150362	0.0194473624195134
P32767	KAP122	YGL016W	0.452744285813779	0.00989106938555715
P42900	SLS1	YLR139C	0.417859686392969	0.0107942034054299
Q05946	UTP13	YLR222C	-0.195563428591434	0.00997659101724367
P07269	PHO2	YDL106C	0.430540672629522	0.013185381511445
P22211	NPR1	YNL183C	0.202397187263497	0.0100867377835026
P08679	CIT2	YCR005C	1.19229937150943	0.016978798265282
Q06385	VPS74	YDR372C	-0.212745486776644	0.0101840264256027
P33202	UFD4	YKL010C	0.382299291319828	0.0102700551898816
P22543	VPS34	YLR240W	0.58860129375072	0.0172427459436407
P38837	NSG1	YHR133C	0.333889999902446	0.0103369252325753
P43570	GYP8	YFL027C	0.843583511856767	0.0135021996071556
P46982	MNN5	YJL186W	0.26578202319288	0.0103553232332397
P46985	MNN11	YJL183W	0.185021564368153	0.010476166029048
P40467	ASG1	YIL130W	0.285007425427732	0.0105077441708603
P32488	ISF1	YMR081C	0.516927820354613	0.0204630865267133
P32629	ANP1	YEL036C	0.201301549459732	0.0105517876856229
P25298	RNA14	YMR061W	-0.206009016073992	0.0107292019397559
P38129	TAF5	YBR198C	-0.168488801480553	0.0107896647559342
P38795	QNS1	YHR074W	0.194494551155934	0.0108392078300948
Q04869		YMR315W	0.266338392326414	0.0108599799857441
P53839	GOR1	YNL274C	0.400941556990137	0.0108779640969187
Q05518	PAL1	YDR348C	-0.233016541333161	0.010879334639833
P38932	VPS45	YGL095C	0.205827683336711	0.0108872170878777
O13297	CET1	YPL228W	-0.196057262158675	0.0108880054517146
P23180	AIM17	YHL021C	0.431928264411532	0.010918031297053
Q03020	ISU1	YPL135W	0.306928095317737	0.0109511096916529
Q08979	KEL3	YPL263C	-0.219588765627257	0.0111450980597502
P17709	GLK1	YCL040W	0.246863242445563	0.0111795219586653
P49090	ASN2	YGR124W	0.203372637481987	0.0112065128123245
P36519	MRPL7	YDR237W	-0.279475476980124	0.0112517959596861
P53250	TWF1	YGR080W	-0.192864780470881	0.0112565353135083
P34162	SRB2	YHR041C	0.299276665431627	0.0113490900414983
Q00955	ACC1	YNR016C	0.323954230703613	0.0113792096894229
P12753	RAD50	YNL250W	0.290402796009893	0.011429637640246
P47169	MET5	YJR137C	0.503100290645566	0.0114518408050672
P41807	VMA13	YPR036W	0.23276172362754	0.0115875306326112
P14120	RPL30	YGL030W	-0.187444740633154	0.0116266011140251
P53083	MDM34	YGL219C	-0.319240350331857	0.0329228672122091
P16861	PFK1	YGR240C	0.181449291294921	0.0117021652002245
P10622	RPP1B	YDL130W	-0.512702084729817	0.0117951123746225
P07275	PUT2	YHR037W	0.190924919655092	0.0118358512666894
P53913	FYV6	YNL133C	-0.279300497271436	0.0138619499524924
P53332	CAB4	YGR277C	-0.263131442859393	0.0119242954144905
Q06485	ATG33	YLR356W	0.488355684775627	0.0119378116182223
P38328	ARC40	YBR234C	-0.214468757314986	0.0119432559564754
P49686	NUP42	YDR192C	0.402081458740362	0.0119474388474138
P41811	SEC27	YGL137W	0.184554736614803	0.0120425158979452
Q12284	ERV2	YPR037C	-0.481429667672078	0.0120991189803312
P24280	SEC14	YMR079W	-0.205205078036492	0.012133418248839
P38999	LYS9	YNR050C	0.164830050396802	0.0121382485723007
P53897	IGO1	YNL157W	-0.263046270712707	0.0121592959988502
P40217	TIF34	YMR146C	-0.164615862427329	0.0121686917826654
P54786	ZDS2	YML109W	-0.325303370704138	0.0121819043457454
P23833	SCO1	YBR037C	-0.401390765954439	0.0121928133501074
P08018	PBS2	YJL128C	-0.217914877185869	0.0122176733743317
Q00245	RHO3	YIL118W	-0.257001143206239	0.0122993360070437
P09436	ILS1	YBL076C	0.184861169921948	0.012300024009446
P33313	CNS1	YBR155W	0.221641791490882	0.0123669048213052
P53230	TAM41	YGR046W	-0.498653734728187	0.0176061996013295
P08466	NUC1	YJL208C	-0.224910180305805	0.0125434894730672
P42949	PAM16	YJL104W	-0.235108489035373	0.0125553774061762
Q02887	ATG21	YPL100W	0.266801496686007	0.0125631046864947
P43561	FET5	YFL041W	0.190050942128181	0.012612407562339
Q03435	NHP10	YDL002C	0.282460021708545	0.0126558020798913
P40053	AIM9	YER080W	0.171492245099952	0.0126560469588005
P40347	LTP1	YPR073C	0.308710609682088	0.0127014585820806
P33299	RPT1	YKL145W	0.198368928146255	0.0127233259340181
P32480	HIR2	YOR038C	-0.333535374611731	0.0137200173485401
P53890	BNI5	YNL166C	-0.162014343893226	0.0128290178475405
P47116	PTK2	YJR059W	0.232421105460944	0.012842950005643
P47127	AIM24	YJR080C	-0.222436646165598	0.0130379326183546
P26793	RAD27	YKL113C	-0.259083144155358	0.0131267819047375
Q04119	PPN1	YDR452W	0.226536738724992	0.0131722781715837
P53843	IST1	YNL265C	-0.234287445724036	0.0132401157791035
P38431	TIF5	YPR041W	-0.148466901544321	0.0133034840290228
Q12403	ERP3	YDL018C	0.420780294585715	0.0133303522102604
P53733	RSM19	YNR037C	-0.264144584198114	0.0133570260934096
P38081		YBR056W	0.192373640722014	0.0134548728382697
P25360	PHO87	YCR037C	-0.305026049075497	0.0134749746637504
P36145	TFA2	YKR062W	-0.216294833867025	0.013592013116104
P32606	PET127	YOR017W	0.304217728780053	0.0157498153905328
Q02354	UTP6	YDR449C	-0.237123072185781	0.0136164068539247
P27809	KRE2	YDR483W	0.210531531464092	0.013624447862391
Q12133	SPC3	YLR066W	0.313619448573519	0.0136481312111673
P32910	RPC34	YNR003C	-0.332879663345398	0.0137511879135319
P11353	HEM13	YDR044W	-0.255342429822864	0.0137547511454679
Q02199	NUP49	YGL172W	-0.191378568066924	0.0138033445552929
P17695	GRX2	YDR513W	-0.277556555060258	0.0138332061465632
P12684	HMG2	YLR450W	0.257384560194843	0.0139633185482413
Q04839	GFD1	YMR255W	-0.616671527970546	0.0149491492769774
P23615	SPT6	YGR116W	0.157914544813355	0.0139759512858382
P00360	TDH1	YJL052W	0.694347982113989	0.0141119539007803
P32381	ARP2	YDL029W	-0.149657233581959	0.014165650537929
P00729	PRC1	YMR297W	0.237266218584857	0.0141738341540708
P02294;P02293	NA	NA	-0.406854519588784	0.0142314077511255
Q04779	RCO1	YMR075W	-0.237155841139419	0.0142452217028608
P48567	PUS4	YNL292W	-0.188187618294172	0.0142734842068437
P40991	NOP2	YNL061W	-0.15906070801498	0.0142843314741125
Q12024	YTM1	YOR272W	-0.204813884733056	0.0143097876035809
P35734	ASK1	YKL052C	0.277497192863613	0.0143217018417534
Q12522	TIF6	YPR016C	-0.243235221596915	0.0143301568920038
Q05636	RRP45	YDR280W	-0.23260847053383	0.0144171896329613
P34219	TOD6	YBL054W	-0.962466065410123	0.0146213278181614
P48363	PAC10	YGR078C	-0.290297716467503	0.0146214930716764
P16622	HEM15	YOR176W	0.281937318682385	0.014749491309855
P40047	ALD5	YER073W	-0.255343174528456	0.0148153897644625
P12612	TCP1	YDR212W	-0.149984838166581	0.0148632774512139
P38812	GEP4	YHR100C	-0.385800754113749	0.014870584541805
P53294	PUS6	YGR169C	-0.445038242363449	0.0171585203549601
P38840	ARO9	YHR137W	-0.240090643122535	0.0149450238048462
P22855	AMS1	YGL156W	1.0467673135374	0.015066558769932
P32523	PRP19	YLL036C	0.256089035057641	0.0151506992616379
P36516	MRPL3	YMR024W	-0.305514871813365	0.0153126971389793
P00431	CCP1	YKR066C	0.273359114284947	0.0153540492807507
P40340	YTA7	YGR270W	-0.157559872872294	0.0154094070146059
P22082	SNF2	YOR290C	0.203163184454372	0.0154200048846323
P07259	URA2	YJL130C	0.166104543288821	0.0154227178947531
P35688	LRG1	YDL240W	-0.439797436659589	0.0154560189567657
Q02205	MEH1	YKR007W	-0.252445221451772	0.01547973144986
P08456	CHO1	YER026C	-0.276995722163093	0.0155442208555943
P32600	TOR2	YKL203C	0.327767110854996	0.015553453734715
P53140	RMD9	YGL107C	-0.227351824534761	0.0155611131368712
P40013	BIM1	YER016W	-0.155977825317134	0.0155852650141786
Q08969	GRE1	YPL223C	0.914456529879523	0.0394220098742276
P53144		YGL101W	-0.195983848793787	0.0157060905326613
P13185	KIN1	YDR122W	0.18981380074392	0.0157226565999457
P53067	KAP114	YGL241W	0.266917528919954	0.0157367865579437
Q12211	PUS1	YPL212C	-0.180500416961269	0.0158059460130114
P12686	MRP13	YGR084C	-0.198723397839679	0.0158568870866982
P36534	MRPL40	YPL173W	-0.236601298361755	0.0158802487690042
P34111	TFC3	YAL001C	0.38165857773155	0.0159011297928752
P15436	POL3	YDL102W	0.208428068613912	0.015916151605146
Q3E7Y3;P0C0W1	NA	NA	-0.267374360801227	0.0159513561292447
Q06630	MHR1	YDR296W	-0.244712951488463	0.0160121203807648
P35172	NTH2	YBR001C	0.518246383679191	0.0280934821376916
P10662	MRP1	YDR347W	-0.192191828332465	0.016118844813
Q00416	SEN1	YLR430W	0.214079475804688	0.016128830536677
Q05021	TAF7	YMR227C	-0.484345792089329	0.0162483121003275
P23797	GPI12	YMR281W	0.631522436655999	0.018792800827493
P38337	SHG1	YBR258C	-0.348436098619459	0.0285177715063816
P21304	PWP1	YLR196W	-0.180947217155992	0.0164577675994916
P13298	URA5	YML106W	-0.236785094955643	0.0164916880727602
P32907	ATO2	YNR002C	0.875101488187983	0.0406552031808957
P33327	GDH2	YDL215C	0.219100153977692	0.0166111251628166
P15442	GCN2	YDR283C	-0.244380425224456	0.0166349110167006
P38074	HMT1	YBR034C	-0.190480267092365	0.0166657372068067
P19073	CDC42	YLR229C	-0.490040648328968	0.0166834343706018
P36057	SRP102	YKL154W	0.33483235563854	0.0167685073460516
P27796	POT1	YIL160C	0.465772197962529	0.0411057049575524
Q03218	MMT1	YMR177W	-0.2280633131695	0.0168653618916036
P40008	FMP52	YER004W	-0.261291813036941	0.0168725317360117
P06701	SIR3	YLR442C	-0.352809440004496	0.0169619339067539
P47122	NPA3	YJR072C	-0.207981883635806	0.0170222291026855
P23369	MRPL25	YGR076C	-0.239088482473935	0.0172076476382544
Q12438	GRX6	YDL010W	-0.250382518162962	0.0173734506824461
P19263	RGR1	YLR071C	-0.314131417319039	0.0173835458024414
P38698	PPX1	YHR201C	-0.198984904219525	0.0175861403836552
P49573	CTR1	YPR124W	0.195964598149111	0.0176552335742907
P53114	NUT1	YGL151W	0.209806157893805	0.017740054784467
P51601	FOL2	YGR267C	-0.220265909806347	0.017958937762215
P25586	KRR1	YCL059C	-0.176152893674036	0.0179617469048233
Q06632	CFT1	YDR301W	0.35480005349903	0.0180247329764733
P33760	PEX6	YNL329C	0.41115741879268	0.0242695068163954
P25623	SYP1	YCR030C	0.167197304209804	0.0180540918440496
P06776	PDE2	YOR360C	-0.379054399211554	0.0180740617326591
Q12234	RUD3	YOR216C	-0.23455239194767	0.0181022937383842
P38890	SET5	YHR207C	-0.288748860155838	0.0182825228873486
Q02208	TOF2	YKR010C	-0.37929593664882	0.0755334176486246
P07260	CDC33	YOL139C	-0.195894306280863	0.0184124949364131
P38266	AIM3	YBR108W	0.265508908426817	0.0184152686519478
P32191	GUT2	YIL155C	0.389027845367487	0.0184184390756757
Q06631	BFR2	YDR299W	-0.204033393372306	0.018469050355729
P23292	YCK2	YNL154C	0.241143299925604	0.0184938824401611
P53080	EDC1	YGL222C	0.358934850930812	0.0197532332366885
P35194	UTP20	YBL004W	0.183774688882121	0.0186928968592541
P39721	AIM2	YAL049C	0.281115051596821	0.0189336805809828
P25342	CDC10	YCR002C	-0.158949651211934	0.018973827151389
P01098	STF1	YDL130W-A	0.500351736040962	0.019017264319474
P47095	MDE1	YJR024C	-0.257818093159049	0.0190264393190959
P13393	SPT15	YER148W	-0.197084925808035	0.0190286961603583
P53335	PXR1	YGR280C	-0.207847191739944	0.0190406379106752
P38695	HXT5	YHR096C	0.380493852264429	0.0445117096033942
P40303	PRE6	YOL038W	-0.205389908845511	0.0190908591563576
Q12060	HFI1	YPL254W	-0.390237666296962	0.0192649803195134
Q06636	GPI11	YDR302W	-0.4180646440822	0.0235528366163063
P28319	CWP1	YKL096W	-0.376219827596191	0.0193868360959056
P53309	YAP1802	YGR241C	0.406359572254264	0.0194014363275475
P32497	NIP1	YMR309C	-0.172474532825145	0.0194286104252696
Q03125	NRG1	YDR043C	0.562737001457887	0.0375389549251563
P40212;Q12690	NA	NA	-0.149759001204409	0.0194703094078601
P52553	YKE2	YLR200W	-0.277568027761735	0.0195253323040263
Q06205	FPR4	YLR449W	-0.243762803795807	0.0196201187073024
P32902	MRP4	YHL004W	-0.226532179562813	0.01966701317537
Q03782	SNU56	YDR240C	0.326749531389222	0.0196915167650461
P47011	GLG2	YJL137C	0.412639275992674	0.0223426002405138
P38891	BAT1	YHR208W	0.229140470053892	0.0197645929718084
Q3E785	SDH6	YDR379C-A	-0.315439697947788	0.0262643062743387
P08638	LEU3	YLR451W	-0.422902904347385	0.0224145815151852
P32775	GLC3	YEL011W	-0.416724874534463	0.0198495782626717
P38139	LDH1	YBR204C	0.646502926058027	0.0211483341322791
P40471	AYR1	YIL124W	0.179779837100376	0.0200475187488215
P53199	ERG26	YGL001C	-0.241495566070729	0.0200510312169942
P00447	SOD2	YHR008C	0.211033804391271	0.0200969692755341
Q08924	RTT10	YPL183C	-0.23654512247602	0.0201586197914166
P53154	GUP1	YGL084C	-0.908768660246427	0.0229882947643587
P38625	GUA1	YMR217W	-0.180117823974037	0.0204271611931716
P53228	NQM1	YGR043C	1.25927487707938	0.0205268063621564
P16658	SEN2	YLR105C	0.744939265618051	0.0205948453888753
P53881	MRPL22	YNL177C	-0.352659075029379	0.0206272681009324
P39112	DSS1	YMR287C	-0.37761513685091	0.0273610588179259
Q03323	SDC1	YDR469W	-0.23450733391887	0.0207336641150928
P43564		YFL034W	0.473496666080848	0.0252095062009667
P53847	DSL1	YNL258C	0.22232316138853	0.0207953492378684
P09880	TRL1	YJL087C	0.21423871326121	0.0208092780606204
P20485	CKI1	YLR133W	0.217045301926273	0.0209343230808838
Q05580	HEL2	YDR266C	0.194849954324134	0.0210713518876598
P14843	ARO3	YDR035W	-0.192993482685168	0.0211065121737019
P56628	RPL22B	YFL034C-A	-0.553201894160793	0.0211450624084606
P40528	SYG1	YIL047C	0.244601509216359	0.0224609592065471
Q12255	NYV1	YLR093C	0.314251676460518	0.0212529089723298
P37298	SDH4	YDR178W	0.422713774821379	0.0282098453887335
P11632	NHP6A	YPR052C	-0.324537908680778	0.0214989559686199
P39682	PRP39	YML046W	0.49223460187471	0.026052583951005
Q03496	TRM732	YMR259C	0.175291043871614	0.0216081991387597
P22007	RAM1	YDL090C	-0.418654584008848	0.0216209392710619
P38300	MBA1	YBR185C	-0.305327297635571	0.0261457081670643
P53254	UTP22	YGR090W	0.171465754305107	0.0216496224983931
P46675	STU2	YLR045C	-0.252983369127691	0.0217016879107239
P40014	SPC25	YER018C	-0.31991061203118	0.0217244618383393
P10869	HOM3	YER052C	-0.183358582032913	0.0217364333323506
P47013	LCB3	YJL134W	0.515886807840815	0.0219196960134797
P07283	SEC53	YFL045C	-0.142098336835829	0.0219396985408498
Q12154	GET3	YDL100C	-0.147359669449624	0.0219606260407747
P53212		YGR021W	-0.356059183562383	0.0265053737641956
Q06497	ANT1	YPR128C	0.332277177480108	0.0220698339015703
P25568	ATG22	YCL038C	0.541622625004553	0.04878682869373
P53221	RPL26B	YGR034W	-0.141968881824283	0.0222870110697332
P48582	BRO1	YPL084W	0.171963810893054	0.0223661840921916
P32501	GCD6	YDR211W	-0.161620943685495	0.0224053980464314
Q12082		YDL157C	-0.619734032262045	0.0293810092559524
P25554	SGF29	YCL010C	-0.258086419157632	0.0227076788058537
Q08887	NDD1	YOR372C	-0.525526768229568	0.0830180547992119
P33334	PRP8	YHR165C	-0.390461500565717	0.0227168213675126
P53930	YAF9	YNL107W	-0.293510898097363	0.0239894478679922
P33338	SLA2	YNL243W	0.147279079896101	0.0227500935882057
P23291	YCK1	YHR135C	0.199572115768241	0.0227830135886673
Q03940	RVB1	YDR190C	-0.207645736133831	0.0229157173391825
P40050	MRX1	YER077C	0.41479351286468	0.0298461893325259
Q00055	GPD1	YDL022W	0.174163934546542	0.0229433192026266
P07264	LEU1	YGL009C	0.213904563191718	0.023027109834559
P87108	TIM10	YHR005C-A	-0.208266291244907	0.0230537317201216
Q06179	FMP27	YLR454W	0.279523545837122	0.0231318704050787
P04821	CDC25	YLR310C	-0.212105911064661	0.0232264428913463
P43586	LOC1	YFR001W	-0.209024173350166	0.0232416185152858
Q02754		YPL067C	-0.361687181432863	0.0233461763797821
P17255	VMA1	YDL185W	0.126937528192045	0.023473020650762
Q03497	STE20	YHL007C	-0.176783688356398	0.0235712676499564
P38816	TRR2	YHR106W	0.362522632811213	0.0263693304608837
Q06504	NAT3	YPR131C	0.32346552457982	0.0236475799633149
Q05934	VID22	YLR373C	-0.243671525519385	0.0237299423764822
P32796	CAT2	YML042W	1.08367479328726	0.0377224843066239
P53070	MTO1	YGL236C	-0.325757399872757	0.0251449312669665
P32909	SMY2	YBR172C	-0.164592954908581	0.0239263083136819
P15274	AMD1	YML035C	0.175001775465297	0.0239929805128094
P04161	ADE8	YDR408C	-0.289255411965609	0.0240407650090406
Q03370	PEX29	YDR479C	0.359261211743959	0.0852301639084273
P32567	PAH1	YMR165C	0.310142835819843	0.0243395953810937
Q12415	TFC7	YOR110W	0.190222888042225	0.0243998808277896
P53011	SEH1	YGL100W	-0.162143422952251	0.0244299468215075
P53550	DCP2	YNL118C	0.144562651391638	0.0244529451939837
P00912	TRP1	YDR007W	0.350013827599682	0.0244890517059139
Q03375	CWC21	YDR482C	-0.325766767135629	0.0246100388345862
Q12071	VPS54	YDR027C	0.227302799225317	0.0246359479134135
P39524	DRS2	YAL026C	0.258342746484328	0.024694606858444
P38339	RGD1	YBR260C	0.382440589843075	0.0248537610663115
P46683	YAR1	YPL239W	-0.209392847727333	0.0248840288243813
P05374	CHO2	YGR157W	0.141906434380985	0.0249149260652965
Q12009	TRM8	YDL201W	-0.186210709052489	0.0251560957873065
P18759	SEC18	YBR080C	0.15851335644729	0.0253144925518259
P38878	LNP1	YHR192W	0.23242156773432	0.0253386451520934
Q12453	CEX1	YOR112W	0.164962683814231	0.0253864102705578
P28005	POP5	YAL033W	-0.317167397628825	0.0254336221603612
P38352	SAF1	YBR280C	-0.85649185173548	0.0283824014345637
P40161	RTT106	YNL206C	-0.204275733352976	0.0255329337442098
P53899	CUZ1	YNL155W	-0.228787264523387	0.025551566862001
P53172	SDS23	YGL056C	-0.175651870338346	0.0256215727700148
P53305	RSM27	YGR215W	-0.281231541964292	0.0285516313922283
P38688	SRP72	YPL210C	0.175885255180599	0.0258519602297844
Q92316	OST5	YGL226C-A	0.385296611619875	0.0331296597346056
P49954	NIT3	YLR351C	0.191368676388503	0.0260278008968724
P50086	NAS6	YGR232W	-0.267754609450918	0.0261642898187166
P34167	TIF3	YPR163C	-0.140214222128144	0.0262043423182564
P00427	COX6	YHR051W	-0.274920749333006	0.0263545608736836
P42838	LEM3	YNL323W	0.218863045525001	0.0263992468573406
P16370	RPB3	YIL021W	-0.219752861072713	0.0265594152698931
P36523	MRPL15	YLR312W-A	-0.206237195760341	0.0265958455167
P25382	RSA4	YCR072C	-0.214883794054877	0.0267028636583743
Q99271	NHA1	YLR138W	0.338092614905456	0.0298551391406289
P38344	REI1	YBR267W	0.215068210158336	0.0269513924166573
P06782	SNF1	YDR477W	0.165667807775542	0.0270001029359998
P38861	NMD3	YHR170W	-0.210053117742437	0.0270460033867461
P47051	AIM22	YJL046W	0.214515688135691	0.0345233302733897
P40059	DOT6	YER088C	-0.986198199305949	0.0284868120367495
P32599	SAC6	YDR129C	0.156549898854063	0.0272825732047172
Q04491	SEC13	YLR208W	0.168221001543994	0.0272912329363844
P38149	DUG2	YBR281C	0.271803095344222	0.0273127890782106
P38858	SOL3	YHR163W	0.188910243521491	0.0274601574583353
P38080	AKL1	YBR059C	0.226868350899334	0.0275272581661698
P40343	VPS27	YNR006W	-0.183555521343859	0.0276079959540822
P38331		YBR242W	0.495588046239838	0.0289996408559815
P47912	FAA4	YMR246W	0.15143869665895	0.0277939092940122
Q12206	WTM2	YOR229W	-0.23976834421898	0.0281262839173758
P10614	ERG11	YHR007C	0.219618266019268	0.0284954302506326
P47085	MHO1	YJR008W	0.214399896456403	0.0360893669866185
Q01532	LAP3	YNL239W	0.169333589261473	0.0286282122256545
P07236	MST1	YKL194C	-0.150663695210724	0.0291442760236957
P47818	CCC1	YLR220W	-0.224972332161109	0.0292349522623996
P38628	PCM1	YEL058W	0.124411619787626	0.0295487778684369
P07262	GDH1	YOR375C	-0.183472279110596	0.0299055086504948
P53935	NST1	YNL091W	0.25779100868867	0.0301200089076019
P39004	HXT7	YDR342C	0.335991905933525	0.030138124118943
Q12347	HRT3	YLR097C	-0.299346478663583	0.0454289817251153
P40555	NAS2	YIL007C	-0.298213845893532	0.030298801966352
P40968	CDC40	YDR364C	0.441084572418614	0.0304242574769895
P40893	REE1	YJL217W	0.317444507769309	0.0304510078682331
P11746	MCM1	YMR043W	-0.229213766863122	0.0319615707803678
Q12277	RRP42	YDL111C	0.340991714797436	0.0306228017074931
P47039	BNA3	YJL060W	0.167694928087993	0.0306790668247237
P38736	GOS1	YHL031C	-0.250899227431567	0.0307222769764551
Q06169	PEX30	YLR324W	0.181073286535366	0.0308027141942705
P31383	TPD3	YAL016W	0.17569935512466	0.0308803827971342
P40318	SSM4	YIL030C	-0.180273441951218	0.0310798001359335
P14127;P02407	NA	NA	-0.169925076320489	0.0312029086210619
P20448	HCA4	YJL033W	0.186250233382076	0.0312151681818854
Q08491	SKI7	YOR076C	0.367951247987939	0.0313868903691556
P39952	OXA1	YER154W	-0.311729514015024	0.0316752777817024
Q03640	TCB3	YML072C	0.16252155742507	0.0317835423228843
P38986	ASP1	YDR321W	-0.207535785329679	0.0320106991985341
P32332	OAC1	YKL120W	0.217200864079093	0.0320771558649596
P32353	ERG3	YLR056W	-0.249297370661509	0.032134216646084
P09734	TUB3	YML124C	-0.163680524703569	0.0321789927594987
P38085	TAT1	YBR069C	0.328776538810985	0.0322773356788201
P05030	PMA1	YGL008C	0.163189913203041	0.0323145107944041
P38970	HAL5	YJL165C	0.196504006343403	0.0324208381421176
P42945	UTP10	YJL109C	0.134628271870248	0.0324680374320155
P53732	MRPS12	YNR036C	-0.246172548088804	0.0404065620919809
P15624	FRS1	YLR060W	0.140785730253231	0.0325485000066536
P28495	CAP1	YKL007W	0.329291336490392	0.0328967816431986
Q04344	HNT1	YDL125C	-0.20155988998868	0.0329613740437239
P38972	ADE6	YGR061C	0.138906896168418	0.0330820236524639
P50108	MNN10	YDR245W	0.330354798259272	0.033111398113017
Q03798	AIM36	YMR157C	-0.295922168183989	0.0331205717646101
Q02206	RSC4	YKR008W	-0.229135427958592	0.0331949721490863
P40202	CCS1	YMR038C	-0.160202828703106	0.0334356841349622
P22515	UBA1	YKL210W	0.120948899146072	0.0334811338036816
P32331	YMC1	YPR058W	-0.203673064114351	0.0336258153748359
P36041	EAP1	YKL204W	0.126881892723066	0.0338977921573801
P40054	SER3	YER081W	-0.367478086265404	0.0339402677743644
P07244	ADE5,7	YGL234W	0.134276644377643	0.033942613525051
P00331	ADH2	YMR303C	-0.303637169502615	0.0340501599739399
Q01766	HAL1	YPR005C	-0.467512286325587	0.0778726767918837
P38804	RTC3	YHR087W	0.770716575910324	0.0341807046772372
P38708		YHR020W	-0.136448129279817	0.0341910244189643
Q04951	SCW10	YMR305C	0.208841964259229	0.0342879484893948
P38075	PDX3	YBR035C	0.172439615021311	0.0344918692177793
P32458	CDC11	YJR076C	-0.196094333733299	0.0348590873966347
P10659	SAM1	YLR180W	-0.130475978015291	0.0350424779425079
P33754	SEC66	YBR171W	0.242057285154853	0.0350961256089997
P32502	GCD7	YLR291C	-0.171685827927472	0.0351462158383085
P38235		YBR053C	0.211297436835334	0.0353486600440627
P32900	SKG6	YHR149C	0.581701519223117	0.0353878238472764
Q12532	RQC2	YPL009C	0.151091380914458	0.0354732097004935
Q08873	SCP1	YOR367W	-0.371560696816427	0.0358442132541875
P36004	KKQ8	YKL168C	0.25918954541882	0.0358560738586214
P40516	EFM4	YIL064W	-0.218601329983311	0.0358632083428732
P38989	SMC2	YFR031C	0.319586563078737	0.0360333382450658
P20435	RPO26	YPR187W	-0.34022115414519	0.0360342763674122
P46678	BDP1	YNL039W	-0.297619611169392	0.036110648351997
P40035	PIC2	YER053C	0.388780004830569	0.0394682853102342
Q04322	GYL1	YMR192W	0.259481158231107	0.0361926643737652
Q06218	DBP9	YLR276C	-0.12344468166566	0.036491448426189
P07273	DST1	YGL043W	-0.173864569014004	0.0365046321101127
Q99247	DUF1	YOL087C	-0.160445843975221	0.0365978981134891
P53969	SAM50	YNL026W	-0.238459636031919	0.0366999851254308
P19541	RDS2	YPL133C	-0.209200317214485	0.0384646217848696
Q06178	NMA1	YLR328W	-0.199802811993514	0.0371382672736635
P21374	ISY1	YJR050W	-0.315075869570251	0.0405046923802894
Q12382	DGK1	YOR311C	-0.220008754464562	0.0372985312450996
P28707	SBA1	YKL117W	0.231349643982018	0.0373482573269499
P32843	YME2	YMR302C	0.20289501896028	0.037603129376021
P28273	OXP1	YKL215C	0.141000836104524	0.0376985410318559
P53599	SSK2	YNR031C	-0.226647799761498	0.0377664016830081
Q12096	GNT1	YOR320C	0.143542275510168	0.0377709282080935
P40079	LCP5	YER127W	-0.136725496592991	0.0378709362564962
P81451	ATP19	YOL077W-A	0.390769330972972	0.038116004219792
P00401	COX1	Q0045	-0.449300743331406	0.0397377041804593
P43598	IGD1	YFR017C	0.268931682068207	0.0466266563978262
P13433	RPO41	YFL036W	-0.19248510548088	0.0386900571326928
P07172	HIS5	YIL116W	0.303388011096668	0.0387689057787599
Q06685	VIP1	YLR410W	0.13277010204267	0.0387767424035815
P39105	PLB1	YMR008C	0.210503851796659	0.0388635906064951
P40185	MMF1	YIL051C	0.203906856138303	0.0389631293888518
P47084	MRX12	YJR003C	-0.179909199779683	0.0391562760569312
P04650	RPL39	YJL189W	0.264339464169712	0.0391564236155954
P32862	RGT1	YKL038W	-0.451432367680798	0.0512826052327355
P53171	GEP7	YGL057C	-0.305242337095706	0.0450635936346443
Q12283	MCT1	YOR221C	0.198471343873305	0.0394712619478108
Q04697	GSF2	YML048W	0.252803199708854	0.0395786189599078
P38822	BZZ1	YHR114W	0.132366631337803	0.0398466921554027
P25367	RNQ1	YCL028W	-0.266673166504134	0.0399667623848426
P33312	RIB7	YBR153W	-0.394638076540229	0.0434333613870425
Q3E764	TMA7	YLR262C-A	-0.179994550752607	0.040034551912991
P53078	SDT1	YGL224C	0.235172264217127	0.0400885439357027
P36095	VPS24	YKL041W	-0.199866226101726	0.0401510508582276
P53090	ARO8	YGL202W	0.1953944896932	0.0402088805998786
P25355	CTR86	YCR054C	0.292207381206946	0.0403238081178226
P53313	SDA1	YGR245C	-0.163763660381026	0.0403542526223048
Q03177		YMR102C	0.356868940903166	0.040478682952838
P53915	NRK1	YNL129W	-0.32371561990232	0.0404873165193588
P17157	PHO85	YPL031C	-0.168058117236768	0.0406543753016265
P25372	TRX3	YCR083W	0.25870727559311	0.0406635413394682
Q12184	YAH1	YPL252C	-0.384905935386062	0.0408856697884847
Q08925	MRN1	YPL184C	0.217707090272867	0.0408982395568634
Q08179	MDM38	YOL027C	-0.179621910630893	0.0410428786755924
P0CX38;P0CX37	NA	NA	-0.152927618435037	0.041180037907904
P32190	GUT1	YHL032C	0.403880134374386	0.0447409484282582
P32642	GRX4	YER174C	-0.157331046174221	0.0412880388434409
P32892	DRS1	YLL008W	-0.120940437060039	0.0412906071782727
Q12450	ERP4	YOR016C	-0.317373593501888	0.0414134686648443
P25087	ERG6	YML008C	-0.196198128896427	0.041539636095695
P40022		YER034W	-0.227211349160175	0.0416567929696974
P32468	CDC12	YHR107C	-0.147860947249974	0.0416646825853004
P38122	ECM31	YBR176W	0.280597424095934	0.0419126717755714
P32449	ARO4	YBR249C	-0.149575452613817	0.0420269638434673
P36018	YPT52	YKR014C	0.201287832862512	0.0421443291137921
P37304	PAM1	YDR251W	0.174642035221222	0.0422587467257716
Q04299		YMR087W	-0.288764234544033	0.0458493416726339
P05759	RPS31	YLR167W	-0.164412014616204	0.0426238928948827
P40043	RGI1	YER067W	0.329654060454622	0.0427658329526008
P38995	CCC2	YDR270W	0.326540759937767	0.0520702484723971
P34237	COY1	YKL179C	0.157319550408261	0.0435480409474788
P48813	GNP1	YDR508C	0.203343967782896	0.0436158079999194
P0CX26;P0CX25	NA	NA	-0.189855271552645	0.0436964630859274
P48365	GYP7	YDL234C	0.252439303349423	0.0437732309655663
P46951	YPP1	YGR198W	-0.216634560269892	0.0437748465059596
P49775	HNT2	YDR305C	-0.389115714492494	0.0454479801683175
Q12181	TAH18	YPR048W	0.203272776640812	0.0438507050189993
Q06833	NVJ2	YPR091C	0.151619362007526	0.0439186441733032
P49089	ASN1	YPR145W	-0.156521704956049	0.0439525704464554
P36016	LHS1	YKL073W	-0.158206382573308	0.043955945107611
P36126	SPO14	YKR031C	0.394463371617046	0.0439607681070511
P36224	JNM1	YMR294W	-0.289040618552264	0.0459167194118327
P32447	ASF1	YJL115W	-0.22373254626924	0.044324091586929
P21306	ATP15	YPL271W	0.326760387719283	0.0443348481167682
P53981		YNL010W	0.112200083474288	0.0445886523089308
P15891	ABP1	YCR088W	0.136586492718408	0.0446146522943518
P40052		YER079W	0.467427870227429	0.0506313566430481
Q03153	ATP25	YMR098C	-0.275639163111187	0.0507356850444083
P32562	CDC5	YMR001C	-0.385848455975456	0.0536731163483961
Q03976	RSM24	YDR175C	-0.185880194203477	0.0449213611305032
P12687	MRP7	YNL005C	-0.144667760803525	0.0450187360599008
P53244	ART5	YGR068C	-0.268138524471457	0.0466750215315501
P43554	SWP82	YFL049W	-0.313377675094642	0.0455435497987019
P34223	SHP1	YBL058W	0.127356283892439	0.0456268743566046
P38219	OLA1	YBR025C	-0.153498005596248	0.0460602889844957
P36136	SHB17	YKR043C	-0.157596613952052	0.046210307200653
P48589	RPS12	YOR369C	-0.170857265743294	0.0464015952738962
P38604	ERG7	YHR072W	0.424867445002501	0.0465819436312752
Q06835	RDS3	YPR094W	-0.370979136191757	0.0526126381686346
P53722	ATP23	YNR020C	-0.284690445985607	0.0557948119899102
Q06493	YLH47	YPR125W	-0.269697493169627	0.0468428047034284
Q04212	ARA2	YMR041C	0.252815247992849	0.0505078881416301
P39940	RSP5	YER125W	0.115457310259217	0.0471818590670806
Q12158	MCD1	YDL003W	-0.241158386208081	0.0472037304570149
P38199	HEK2	YBL032W	-0.200591994139341	0.0472231816756813
P39938	RPS26A	YGL189C	-0.23880388190917	0.0472267282552864
Q02642	EGD1	YPL037C	-0.331017388366547	0.0473025237238447
P39960	BEM2	YER155C	0.12108411900179	0.0474365305645725
P38934	BFR1	YOR198C	-0.125398733668753	0.0474976138393907
Q02516	HAP5	YOR358W	-0.225641825524697	0.0654597686631699
P37254	ABZ1	YNR033W	-0.234825167856073	0.047879895690298
P52910	ACS2	YLR153C	0.174469299717728	0.0482373603771913
P38904	SPP41	YDR464W	-0.220416773589527	0.0483725972238886
P41896	TFG2	YGR005C	0.150217400791824	0.0486483076839871
P35844	KES1	YPL145C	0.139530956506476	0.0486906214397035
P38345	SDH8	YBR269C	0.178441907365865	0.048804051042808
P00890	CIT1	YNR001C	0.174443389011124	0.0489373939386256
P00958	MES1	YGR264C	-0.125303645838819	0.0489422736969527
Q08285	RRP40	YOL142W	-0.305411544812458	0.0491727559974476
P29295	HRR25	YPL204W	-0.187723830025401	0.0491987435265793
Q07807	PUF3	YLL013C	-0.118575426473303	0.0492863785037157
Q00578	SSL2	YIL143C	0.263644790026259	0.0493496807877059
P18480	SNF5	YBR289W	0.244519681773895	0.0493608891865592
Q03088	SVL3	YPL032C	0.173073824100246	0.0495074138708676
P47104	RAV1	YJR033C	0.21965428906142	0.0498302927555799
Q08045	LCL2	YLR104W	-0.165786574628211	0.0502374790119259
Q06815	MRL1	YPR079W	0.264750621038402	0.052425583133262
P48570	LYS20	YDL182W	0.152545513239591	0.0509753714363116
P14906	SEC63	YOR254C	-0.144746269105934	0.0509864088723097
Q12205	MNL2	YLR057W	0.29777895982474	0.0510333800109415
P32806	GYP6	YJL044C	0.275829418717631	0.0512493997594506
P10127	ADH4	YGL256W	-0.166883903166848	0.0513363231294403
P53850	RTC4	YNL254C	0.389856126245682	0.0852096112758701
Q02197	MAK10	YEL053C	0.405014524595313	0.0515214956040947
P53836	CAF120	YNL278W	-0.235477846559974	0.0516680814204375
P31755	OCH1	YGL038C	0.244268775018764	0.0516790646566915
Q03441	RMD1	YDL001W	0.341582416072015	0.0516999881307389
P38065	APL3	YBL037W	-0.218511464330085	0.0517168911578768
P32474	EUG1	YDR518W	0.232077665404468	0.0518087909069431
P48558	BXI1	YNL305C	0.273095783213773	0.0699369150114505
P53158	KXD1	YGL079W	-0.431647866630307	0.0651493743499166
P30624	FAA1	YOR317W	0.208905893747328	0.0523122819276876
P46957	POL31	YJR006W	0.346542808716723	0.0523235259212759
P39692	MET10	YFR030W	0.393498806382567	0.0528086640549997
P39517	DHH1	YDL160C	-0.144525191990766	0.052809793630625
P10664	RPL4A	YBR031W	-0.132253882044516	0.0528326154870493
P50945	MIC27	YNL100W	0.23579602815806	0.0528534107075821
P36076	CAB3	YKL088W	0.227164070360086	0.0530509264340437
P15424	MSS116	YDR194C	-0.121182143494416	0.0532815620641867
P25270	MRM1	YOR201C	0.356086468563142	0.0537445927885903
P04819	CDC9	YDL164C	0.141987292746926	0.0537697550682013
P05739	RPL6B	YLR448W	-0.126881293228358	0.053785408651974
P53297	PBP1	YGR178C	-0.148952910015016	0.0538287770896913
P32656	GCG1	YER163C	0.246906271476202	0.053850440901806
Q12287	COX17	YLL009C	-0.200949996817393	0.0538656593109611
P36081		YKL077W	-0.165451099507443	0.053881250239775
P32387	MRP20	YDR405W	-0.23368757680284	0.0539862097495701
Q12305	RDL1	YOR285W	0.165268950358382	0.0540955831964562
P53125	ITC1	YGL133W	0.240684067587587	0.0543815637105098
P52286	SKP1	YDR328C	-0.173513062748086	0.0546075764316811
P21734	UBC1	YDR177W	-0.17597728262643	0.0546186543399604
P07285	TRP4	YDR354W	-0.178623830395434	0.0548888084861484
P11745	RNA1	YMR235C	-0.13636541646656	0.055531584588592
Q3E762		YBR230W-A	0.41703876031162	0.0594689289184746
P47171	HIR3	YJR140C	-0.209177554822503	0.0557107772248118
P40553	DOT5	YIL010W	-0.217155285553158	0.0557807889843595
P08518	RPB2	YOR151C	-0.121709639057304	0.0561522503465374
Q03516	RSN1	YMR266W	-0.234293084445117	0.0563099410226747
P41940	PSA1	YDL055C	-0.202649459526327	0.0563407790391345
Q99332	FRT1	YOR324C	-0.712375240043151	0.0910067380412598
Q12320	GLO4	YOR040W	0.257383503625494	0.0659899772118895
Q05515	SVF1	YDR346C	-0.135928952664148	0.056646352449283
Q12068	GRE2	YOL151W	0.188936225617262	0.0567698408729146
P14922	CYC8	YBR112C	-0.129458549514556	0.056771281818602
Q00362	CDC55	YGL190C	-0.15781720261376	0.0568324594831206
P53170	PKP2	YGL059W	0.353548559743363	0.0702936178823957
P10566	MRS3	YJL133W	0.557079702419344	0.0569543932553627
P04046	ADE4	YMR300C	0.131330747391868	0.0569711687344022
P39685	POM152	YMR129W	0.118265052121544	0.0569875909339629
Q02326	RPL6A	YML073C	-0.178594340710319	0.0570881969802873
Q12049	THP3	YPR045C	-0.217695213025575	0.0570970860804444
P38272	SHE3	YBR130C	0.189921893721529	0.0571126727947103
P07267	PEP4	YPL154C	0.177085688219719	0.0572070179520505
P36165	TGL4	YKR089C	0.254873747743513	0.0572083622859184
P40517	YRB2	YIL063C	-0.236060633958562	0.057341778970834
P32588	PUB1	YNL016W	-0.178106983445787	0.057421475945499
P46654	RPS0B	YLR048W	-0.163252550962149	0.0574278911777356
P32319	PEP1	YBL017C	0.110849177487768	0.0577351212603979
P0CX28;P0CX27	NA	NA	0.389894277663899	0.0577721742938342
P02557	TUB2	YFL037W	-0.166974480647504	0.0578006039484633
P12683	HMG1	YML075C	-0.130419534927334	0.057884699837268
P53255	DRN1	YGR093W	-0.194693579708545	0.0578874484194521
P27825	CNE1	YAL058W	0.460266091247021	0.0580733322349242
P10963	PCK1	YKR097W	-0.342247137740976	0.0766784022841047
Q08685	CLP1	YOR250C	-0.29502434915727	0.0585485125630822
Q04430	CAB1	YDR531W	0.263251238225003	0.0585754730147593
P34160	STO1	YMR125W	0.105986852286616	0.0586499518067559
Q04199	CAC2	YML102W	-0.211702219176715	0.0596577975699875
Q08967	FLC1	YPL221W	0.211667223162728	0.0597589008349179
Q03778	FMN1	YDR236C	-0.168538957636542	0.0597910873049198
P39955	SAP1	YER047C	0.266761987296512	0.0599104405899684
Q01329	PTA1	YAL043C	-0.192450315137513	0.0599736360690881
Q9URQ5	HTL1	YCR020W-B	0.382750093324951	0.0617582815050609
P35180	TOM20	YGR082W	-0.209549338145266	0.0600719566910551
P38930	CKB2	YOR039W	-0.207853466287663	0.0602165843129409
P40413	CCT5	YJR064W	0.159109313957202	0.060383671641729
P50623	UBC9	YDL064W	-0.154900051913721	0.060516063242287
P30902	ATP7	YKL016C	0.238746849399874	0.0606896061907239
P19097	FAS2	YPL231W	0.101126082847436	0.0607369308825261
P40508		YIL077C	-0.432984219390228	0.060846972590595
P27614	CPS1	YJL172W	0.150272010353916	0.0609703698195957
Q07878	VPS13	YLL040C	0.107474816910749	0.0610319549988565
Q07381	TSR1	YDL060W	-0.171420666691581	0.061160351832139
P53551	HHO1	YPL127C	-0.200679044461804	0.0613144885383394
P23293	SGV1	YPR161C	-0.16535195590281	0.0614408498667954
Q12134	HUA2	YOR284W	-0.239164312527386	0.0870026792239645
P13663	HOM2	YDR158W	-0.150350766587962	0.0616235651126584
P48569		YDL183C	0.232615913337039	0.0754666574248092
Q04175	SXM1	YDR395W	-0.138027320187799	0.0620436014375571
Q12250	RPN5	YDL147W	-0.147968738817429	0.0621555630010377
P53885	MDG1	YNL173C	0.202276128283771	0.0622406435440073
Q04935	COX20	YDR231C	-0.18480194411282	0.0624506792563019
P43585	VTC2	YFL004W	0.152537458788771	0.0625141624333711
Q07533	CYK3	YDL117W	0.215328371553664	0.0625192986104729
P27637	BUD14	YAR014C	-0.217242823988258	0.0625529090349022
Q02866	MUK1	YPL070W	-0.260253035919131	0.064370517044916
P38291	POP7	YBR167C	-0.234395936500576	0.0666473004335092
Q03430	RSM28	YDR494W	-0.169973225482948	0.0631566305823375
Q03648		YMR209C	-0.340563691197136	0.0632632830003216
P38428	CUE1	YMR264W	0.22748170948022	0.06329152266212
O13547	CCW14	YLR390W-A	-0.314858323284504	0.0632937269858295
Q08202	OPI10	YOL032W	0.300610702765628	0.0633002812961178
P41832	BNI1	YNL271C	0.153351593734971	0.0633798493850126
P32618		YEL043W	-0.260302677589905	0.0634080899820384
Q04347	BUD22	YMR014W	-0.236590573269684	0.0635309941919286
P04840	POR1	YNL055C	-0.157785186387891	0.0638168387149685
P53927	NOP15	YNL110C	-0.149745992612303	0.0638800413979356
P54867	SLG1	YOR008C	0.268412578892633	0.0639366426645567
P25642	IMG2	YCR071C	-0.2023294345266	0.064160833048093
P33442	RPS1A	YLR441C	0.182352760743925	0.0643151846548693
P33418	LOS1	YKL205W	0.181806215900895	0.0644363350956312
P00925	ENO2	YHR174W	-0.132388881587431	0.0646324716564999
P22204	DBF2	YGR092W	0.208774992571815	0.0646489185369667
Q02630	NUP116	YMR047C	0.165659260492689	0.0649046022645688
P21375	OSM1	YJR051W	0.137844003721373	0.0649650516096988
Q05533	INM2	YDR287W	0.194406176635056	0.0651363652890337
Q00246	RHO4	YKR055W	0.229930497588498	0.0652905095118295
P38174	MAP2	YBL091C	-0.160114633631718	0.0653054855384982
P38882	UTP9	YHR196W	-0.239343606771374	0.0653279090013732
Q06510	TAZ1	YPR140W	-0.305339776500176	0.0844265087166303
Q12692	HTZ1	YOL012C	-0.25316357482599	0.0656284209876434
P38758	TDA3	YHR009C	0.122360794020377	0.065638265977046
P06197	PIS1	YPR113W	-0.243814709290806	0.0658089657419728
Q03973	HMO1	YDR174W	-0.183333950860398	0.0660471438908167
P41056	RPL33B	YOR234C	-0.366325124183732	0.0661340431114329
Q12455	SPE4	YLR146C	-0.403683359307131	0.0662110092255986
P38332	RRT2	YBR246W	-0.299462631108867	0.0732689423850082
P54860	UFD2	YDL190C	0.146366739073169	0.0667536701733556
Q06177	TMA10	YLR327C	-0.792427011046822	0.0735046076915406
Q05541	NSE3	YDR288W	0.520629196143709	0.0770988799720676
P40210	SIP5	YMR140W	0.230497799769765	0.0674954227879916
P21771	MRPS28	YDR337W	-0.153478340458285	0.0679432121971746
P25451	PUP3	YER094C	-0.176468838802112	0.0681332650488692
P17106	CBF1	YJR060W	0.205697088181811	0.0683803594694372
P38009	ADE17	YMR120C	0.256936765463443	0.0685666647470418
Q06071	BLS1	YLR408C	0.559918636742925	0.088176332138697
P46990	RPL17B	YJL177W	-0.109056611335362	0.0693529948752837
Q12499	NOP58	YOR310C	-0.119675579529368	0.0696633200121738
P32481	GCD11	YER025W	-0.119762588629616	0.069678823142323
P40557	EPS1	YIL005W	0.125634265540427	0.0696930311773186
P53246	ENV11	YGR071C	0.38598328583377	0.0890264772592726
Q12406	ARP7	YPR034W	-0.19421087500373	0.0698786605220747
P48164	RPS7B	YNL096C	-0.133489664692831	0.0700030572161579
P39006	PSD1	YNL169C	0.170413741485419	0.0700234725516372
P40482	SEC24	YIL109C	0.123138929261309	0.0703317587735961
Q06688	BER1	YLR412W	-0.254304025006782	0.0743923455993209
P08425	MSF1	YPR047W	-0.302603454730434	0.0770813810227425
P39533	ACO2	YJL200C	-0.160584116441761	0.0704234912036632
P24276	SSD1	YDR293C	0.0991216780715547	0.0705369272048731
Q03834	MSH6	YDR097C	-0.129617123465003	0.0707099652956332
P34087	RPB7	YDR404C	-0.386965735450946	0.0707123467958238
P39678	MBP1	YDL056W	-0.368836404294893	0.0708494263465665
Q12343	MED4	YOR174W	0.261621308295673	0.0712119827276385
P40151	MGS1	YNL218W	-0.379355878056398	0.0713963762744744
P06103	PRT1	YOR361C	-0.104793517557351	0.0715880389328831
P38153	APM3	YBR288C	-0.190447229425644	0.0719645080245748
P40567	MSL1	YIR009W	-0.456954425015866	0.0720879364518488
P17558	PET123	YOR158W	-0.253031742504024	0.0720989734374322
P16521	YEF3	YLR249W	-0.105083084114433	0.0720993040345654
P23638	PRE9	YGR135W	-0.140617471967619	0.0722111906954852
Q12745	SEC39	YLR440C	0.183839558003797	0.0722124765687986
P27705	MIG1	YGL035C	-0.18617574285922	0.0722164633408679
Q12063	NUS1	YDL193W	-0.295070836098976	0.0726318783750905
Q12004	TFB4	YPR056W	0.186558010741887	0.0726769858484699
Q01919	KIN4	YOR233W	-0.511149913034021	0.0730440780678814
P17123	SPO12	YHR152W	-0.274171313795804	0.0871348545250655
P32469	DPH5	YLR172C	-0.171728628404892	0.07307347734177
P43592	FAR7	YFR008W	-0.221063980955361	0.109339890673462
P28000	RPC19	YNL113W	-0.125541482229742	0.0733319943061544
P47089	TMA22	YJR014W	0.131639063684005	0.0734631789076489
P53166	MRH4	YGL064C	-0.453760873225708	0.0735748234937361
P43535	GCN20	YFR009W	0.144770214341001	0.0737172239474521
P40011		YER010C	-0.201653717742669	0.0737813296225911
P15454	GUK1	YDR454C	-0.150531604262838	0.0738392482008677
P47050	RTT101	YJL047C	-0.35265968580817	0.0761638145988831
Q05809	COA4	YLR218C	-0.251618122071442	0.100724685596115
P38208	POP8	YBL018C	-0.388941890304512	0.0743322119233345
P53112	PEX14	YGL153W	0.131638638246514	0.0744860933598357
P26755	RFA3	YJL173C	-0.19227821960844	0.0748726505077751
Q12374	NCA2	YPR155C	0.283521606715954	0.0749115536486635
P38820	UBA4	YHR111W	0.115309503119938	0.0754967351422241
P00937	TRP3	YKL211C	0.160731931402367	0.0759200048245258
P38634	SIC1	YLR079W	0.327774179264367	0.0955243593756576
P32330	DGR2	YKL121W	0.2376174826218	0.0903212810283408
P08524	ERG20	YJL167W	-0.117039425653203	0.0761501158013808
P38264	PHO88	YBR106W	-0.126078769723694	0.0762661168524331
P05740	RPL17A	YKL180W	-0.276187920374234	0.0763024576705767
P25555	GBP2	YCL011C	0.120520075836097	0.0763176159570993
Q08749	TIM18	YOR297C	0.28191658366055	0.102962593539121
Q12034	SLF1	YDR515W	-0.185860873059433	0.0765483178680686
P53276	UTP8	YGR128C	-0.18958969588585	0.0766711905052654
Q12510	CMR1	YDL156W	-0.19520516372236	0.077199919267738
Q05867		YLR283W	0.480051811577187	0.0813313498604211
P33314	BUD2	YKL092C	-0.300210801698146	0.0774663768452521
P47083	MPP10	YJR002W	-0.124394488341476	0.0776004094901257
P10964	RPA190	YOR341W	-0.105542392578059	0.0777890950431506
Q00873	CYT2	YKL087C	-0.320852744262549	0.0777927071053449
P32494	NGG1	YDR176W	-0.288463144982309	0.0778477588649894
P07991	CAR2	YLR438W	0.266533315834536	0.0778740125459267
P25332	RBK1	YCR036W	-0.225534301774932	0.07840727649843
P52892	ALT2	YDR111C	-0.262107522327035	0.0785383467276932
P38764	RPN1	YHR027C	0.115857188876799	0.0789275567549826
Q08732	HRK1	YOR267C	0.175485199153499	0.0791169891753624
Q06078	UTP21	YLR409C	-0.171566224597978	0.079320582746397
P32899	IMP3	YHR148W	-0.159626389999442	0.0793210360881138
P43613	ERJ5	YFR041C	-0.28215802505148	0.0793457984809555
P25045	LCB1	YMR296C	-0.11438635956651	0.0793852247772397
Q06053	DUS3	YLR401C	-0.142891306426737	0.0793854897160358
P38262	SIF2	YBR103W	0.171349004717904	0.0794731986171645
P42841	PFS2	YNL317W	0.208910494741943	0.0798919431920429
P33331	NTF2	YER009W	-0.147202129635446	0.0805074480267008
O14455	RPL36B	YPL249C-A	-0.251473577774846	0.0812595448571924
Q03941	CAB5	YDR196C	0.202790917633497	0.0813192643586648
P04807	HXK2	YGL253W	-0.132682405338535	0.0818293168193467
P22353	MRPL8	YJL063C	-0.283017440163981	0.0819405708285085
Q01217	ARG5,6	YER069W	0.216233553735993	0.0820204219021076
P32263	PRO3	YER023W	-0.138877453245861	0.0824697721269879
P53323	BUD32	YGR262C	-0.264207548486144	0.0825504739851926
Q12018	CDC53	YDL132W	0.111760617840535	0.082630309650948
P40549	MNT3	YIL014W	0.260794726246676	0.0827154172189397
Q04307	RPC11	YDR045C	0.236081898633856	0.082957864497208
P40075	SCS2	YER120W	0.124383881613397	0.0832429864553733
P33401	PGM1	YKL127W	-0.114875083189574	0.0832710056990797
P32788		YBL010C	0.520679146036802	0.0937883569587998
Q04418	RBA50	YDR527W	-0.220382885568895	0.0837617585067831
Q6Q560	ISD11	YER048W-A	0.227085575476398	0.0838331131877777
P00724	SUC2	YIL162W	-0.257280528074894	0.0838347593715494
Q04493	GIM5	YML094W	-0.24454553062148	0.083920249447868
P43560	LAM5	YFL042C	0.165411415664344	0.0839623316378211
Q06817	GRS2	YPR081C	0.251146702640042	0.0863442815688966
P07342	ILV2	YMR108W	-0.105260185029831	0.0844392068373647
P32915	SEC61	YLR378C	-0.248959714959696	0.0845886344995948
P32464	HYM1	YKL189W	-0.252989731204828	0.0847992834344501
P36039	EMC3	YKL207W	0.259821197705904	0.0848866473195654
P39543	SOP4	YJL192C	-0.367275357278118	0.0852612732396338
P38712	RRP3	YHR065C	-0.161938037028104	0.0856619641334334
P32792	YSC83	YHR017W	0.297994720380167	0.0858249371963279
Q06671	ATG23	YLR431C	-0.261494424298675	0.161726715223578
Q6WNK7	SUS1	YBR111W-A	0.332014109366536	0.0907752415834971
Q08269	ALR1	YOL130W	-0.184271984193384	0.0868426057686269
O14468	BIL1	YOR304C-A	-0.401771308109407	0.106818582933399
Q02774	SHR3	YDL212W	-0.258437628621849	0.0871487722452063
Q08287	NOP8	YOL144W	-0.145493480568735	0.0872828311423521
P43563	MOB2	YFL034C-B	0.286861089242102	0.0976255561741605
P34228	SEF1	YBL066C	-0.285262473915186	0.0977014658385196
P53073	EMC4	YGL231C	0.158396611394856	0.087757046750316
P20967	KGD1	YIL125W	0.141785160710349	0.0879513858093292
Q02875	SYH1	YPL105C	0.12255371557378	0.087975164616761
P14743	NMT1	YLR195C	-0.116572313913018	0.0883449998495142
P32579	SUA5	YGL169W	0.274332820455985	0.0883890742455242
P50095	IMD3	YLR432W	-0.112888605814891	0.0884080055894064
P36108	DID4	YKL002W	0.165134218308726	0.0885448939672303
Q03655	GAS3	YMR215W	-0.158798521793209	0.0887580253802182
P27466	CMK1	YFR014C	0.160668292309545	0.0889924267986493
P40892		YJL218W	-0.498174552529367	0.0962542104139895
P33412	ECT1	YGR007W	0.187559915162716	0.0894697312644235
Q12429	DPH6	YLR143W	0.205000275380748	0.0894736328878043
P53120		YGL140C	0.221454239120359	0.0896669250369563
P32911	SUI1	YNL244C	-0.106834803305148	0.0896690474499607
P52490	UBC13	YDR092W	-0.156194182914096	0.0897107544478318
Q06350	CTS2	YDR371W	-0.427669135242311	0.0939791524608205
P53131	PRP43	YGL120C	-0.107620389514384	0.0899244578841845
P32864	MRS6	YOR370C	-0.143892655093975	0.090170202677448
P47006	RPA34	YJL148W	-0.286610839558897	0.0904080878305401
P53109	AIM14	YGL160W	0.24538439895046	0.0904453008785861
P38815	YPT35	YHR105W	-0.341226128800674	0.0950492288287186
P47045	TIM54	YJL054W	0.148757446704298	0.0910585019101737
Q12245	POC4	YPL144W	-0.350133572533384	0.0912444862213315
P36163	OMA1	YKR087C	0.318351174453724	0.105818371430813
P40160	RIO2	YNL207W	-0.148713433927302	0.0914453861048366
P10823	GPA2	YER020W	0.221425283985006	0.0914590141680154
Q01976	YSA1	YBR111C	0.167420227299193	0.0914764034348415
P23285	CPR2	YHR057C	-0.180820168181249	0.091716668617833
P53163	MNP1	YGL068W	-0.206845346733161	0.0919124646805699
P33750	SOF1	YLL011W	-0.180812824573689	0.0920834660643308
Q12084	DAS2	YDR020C	-0.180338037667962	0.09209143506463
P43573	BUD27	YFL023W	0.119145081860015	0.0924604637834138
P53204	NMA2	YGR010W	-0.172733965914752	0.0926069718718331
P46673	NUP85	YJR042W	0.124646204558289	0.0926567456757924
P0CX54;P0CX53	NA	NA	0.116826768270244	0.0927010080959009
P39925	AFG3	YER017C	0.197782304510326	0.0927046432296596
P46958	IDS2	YJL146W	0.267065858582914	0.0927252075903451
P32496	RPN12	YFR052W	-0.127491848104356	0.0928833032746978
Q08968	FMP40	YPL222W	0.312914600279147	0.0971282830350443
P20107	ZRC1	YMR243C	-0.239068143195052	0.0930599447298679
Q99287	SEY1	YOR165W	0.123179466260982	0.0930605806097962
Q12480	AIM45	YPR004C	-0.124913424551618	0.093064418184525
Q07914	PAM18	YLR008C	0.166959637596438	0.0933905729128923
Q06549	CDD1	YLR245C	-0.297305848347438	0.0954398029033496
P36102	PAN3	YKL025C	0.20090266057834	0.0936709100235208
P38167	ECM21	YBL101C	0.191167997605895	0.0937648208549707
Q04439	MYO5	YMR109W	0.11926708429278	0.0938068981667345
P13574	STE12	YHR084W	-0.19868398851094	0.0939374391841575
P47118	YAE1	YJR067C	0.252920052538439	0.094285398047879
P25037	UBP1	YDL122W	0.151633550610178	0.0942995487583794
P34253	KTI12	YKL110C	-0.261888377676559	0.0947642038415344
P32452	PHA2	YNL316C	-0.162962450871508	0.0948059175906968
P02406	RPL28	YGL103W	0.158622853831474	0.0949493772439813
Q3E829	MHF2	YDL160C-A	-0.286246232903366	0.101993264828659
Q08831	VTS1	YOR359W	0.169593575409507	0.0949929496171158
Q00776	APM1	YPL259C	-0.274331366678393	0.0952599756252945
Q12055	FAP7	YDL166C	-0.165879210526096	0.095567941793213
Q04458	HFD1	YMR110C	0.194961546012127	0.095883082667906
Q08562	ULS1	YOR191W	-0.279141418404155	0.0978429172760012
Q03254	FCP1	YMR277W	-0.13072698541902	0.0959119745227479
Q04651	ERV41	YML067C	0.142738256791642	0.0961698571827522
P31380	FUN30	YAL019W	-0.160168850384462	0.0961909821140045
Q07350	PRP11	YDL043C	-0.3511712928665	0.0984013570430542
Q05905	HRI1	YLR301W	-0.161692563481068	0.096565209837403
P40019	CHZ1	YER030W	-0.220015930406579	0.0966510930596007
Q05787	HRD3	YLR207W	-0.197478350461889	0.0967068959587962
P54861	DNM1	YLL001W	0.0922207580741414	0.0967661712132765
P38707	DED81	YHR019C	-0.103588561797579	0.0979983614503912
Q99210		YOR111W	0.232680625853543	0.0984277565105598
Q08651	ENV9	YOR246C	0.346972264951635	0.102986746748685
P46367	ALD4	YOR374W	0.17822308444601	0.0988820371042733
P47017	LSM1	YJL124C	-0.205306406550658	0.0991237553077134
P36101	TCD2	YKL027W	-0.163521154559156	0.0992070690773358
P49955	HSH155	YMR288W	0.140554452269772	0.099325884446831
P38286	IFA38	YBR159W	0.199191877105701	0.0996354934116217
Q06892	POS5	YPL188W	0.291424842576546	0.0998968307728503
Q05027	TAF9	YMR236W	-0.160069197408426	0.0999613247745103
Q08109	HRD1	YOL013C	-0.354359439540044	0.12756264142557
Q2V2P4		YIL156W-B	-0.294632584122326	0.104524054299137
Q00816	REG1	YDR028C	-0.148822154661129	0.100735132778449
P38828	LSM12	YHR121W	-0.1640717908152	0.101017733333104
Q04673	SSL1	YLR005W	0.155861696905966	0.101384986906154
Q03774	TRM82	YDR165W	-0.133891286341683	0.101456641067819
P53743	ESF2	YNR054C	0.119794479809947	0.1015944830084
P35056	PEX5	YDR244W	0.178160950695339	0.101610504520542
P54115	ALD6	YPL061W	-0.127441981953069	0.101910912117194
P13382	POL1	YNL102W	-0.146249600190366	0.101983043603649
P29547	CAM1	YPL048W	0.0968567506861433	0.102199891463125
Q01448	HPC2	YBR215W	-0.295339561594147	0.102314144226544
P08593	MSS18	YPR134W	-0.275118641453378	0.109420736306349
P25369	LSB5	YCL034W	0.129431329302047	0.102419807942841
P48415	SEC16	YPL085W	0.0950487687682475	0.103141723061302
Q12262	MCM16	YPR046W	-0.322361184934618	0.11034065456128
P06106	MET17	YLR303W	0.165649004402177	0.103386545204175
P40518	ARC15	YIL062C	-0.155583465963627	0.10344635176359
P36161	NUP133	YKR082W	0.106942516963336	0.103731181623899
Q3E7X9;P0C0X0	NA	NA	-0.11318790907977	0.103810416470852
Q12301		YDL180W	0.263827020292069	0.156119752395419
Q08224	THI20	YOL055C	0.172798211243062	0.104123549757729
P38629	RFC3	YNL290W	-0.153469033814112	0.104182642890357
Q06001	FAR10	YLR238W	0.261775016507258	0.124489808188655
P0CX32;P0CX31	NA	NA	0.156257349301171	0.104655747819449
P33755	NPL4	YBR170C	0.110796007798914	0.104663530020813
P39677	MEF2	YJL102W	0.323542005710902	0.104749397172399
P32266	MGM1	YOR211C	-0.114062031479918	0.104832305751604
P46677	TAF1	YGR274C	-0.272535044245984	0.104902114130023
P15496	IDI1	YPL117C	-0.126046515304093	0.105115344551067
P22213	SLY1	YDR189W	0.154944416652391	0.105220732662062
P39923	NPR2	YEL062W	0.162110808057346	0.109538073178554
Q04600	TMA64	YDR117C	0.161029527740734	0.105266930276689
P38911	FPR3	YML074C	-0.116723885191082	0.105574904959146
Q12288		YLR126C	0.141102080746684	0.10599272036401
P39945	AST2	YER101C	-0.172985601203809	0.116577186113066
P38321		YBR225W	0.223212230327551	0.10639284021661
P32583	SRP40	YKR092C	0.303233068127131	0.106476897110146
P42938	TDA10	YGR205W	0.231809962517357	0.106478615233864
Q06407	RGA2	YDR379W	0.244795932111344	0.106535640944079
Q03525	TMA23	YMR269W	0.329252615290248	0.1066274820123
P43596	IOC3	YFR013W	-0.203420217775488	0.106973905962359
P28321	YJU3	YKL094W	0.117695775736546	0.107000538043781
P25651	CSM1	YCR086W	0.234132527043727	0.107476858140492
P53388	DIP5	YPL265W	0.252057916084429	0.111787967008262
P46682	APL6	YGR261C	0.202662955723774	0.107526076901546
P53736		YNR040W	0.212221169753416	0.112137389031606
P41910	MAF1	YDR005C	-0.274491150022978	0.110116189034103
P25588	MRC1	YCL061C	0.173008547542651	0.108192269743039
P25574	EMC1	YCL045C	0.120250540729931	0.108730388926129
P32582	CYS4	YGR155W	0.112184572244864	0.109039018197963
P53145	LSG1	YGL099W	0.101513857277869	0.1092374475564
P52489	PYK2	YOR347C	0.170713299759946	0.109652916706198
P53137	CUE3	YGL110C	0.193262570804961	0.109775832394303
P31115	DEG1	YFL001W	-0.289844305457272	0.109824055006218
Q03557	HER2	YMR293C	0.477005575764508	0.120515057642866
P33893	PET112	YBL080C	0.266127918099389	0.117127170715117
P40460	NDC80	YIL144W	-0.315318220592797	0.110376266962704
P27810	KTR1	YOR099W	0.162264799274173	0.110401576177062
Q04033		YDR415C	0.402221321868755	0.148077150363222
P32566	SMI1	YGR229C	-0.191010056223558	0.110885429757343
Q03280	TOM1	YDR457W	0.093603806801557	0.110925076676563
P34163	TGL1	YKL140W	0.171012064723111	0.111140821302244
P04147	PAB1	YER165W	-0.100557015362021	0.11123030957354
Q06107		YPR114W	0.268257835755374	0.111267654268226
P38349	UBX7	YBR273C	0.125977252066761	0.111570851453454
P38825	TOM71	YHR117W	0.109099489137332	0.112016646054972
Q06698		YLR419W	-0.116710443673806	0.112400210531305
Q03695		YMR206W	0.175279574149329	0.149968448462969
P38771	RRF1	YHR038W	-0.135855227180063	0.113215496614233
P39003	HXT6	YDR343C	-0.31834029895337	0.128202104290233
P38772	BCD1	YHR040W	-0.281785591803445	0.115413887595967
Q08686	TUM1	YOR251C	0.108583235787147	0.114074437175746
P47141	RSM26	YJR101W	-0.240298103611199	0.11407566284974
P07277	ERG12	YMR208W	0.140235151570803	0.114358416196639
P53759	DUS1	YML080W	-0.366410610356173	0.114500645063692
P53200	EFM5	YGR001C	-0.173927398903185	0.114516167142791
P33300	SUR1	YPL057C	0.336053261407589	0.135606129951481
P53219	IMO32	YGR031W	-0.164964679810058	0.115342101748964
Q05785	ENT2	YLR206W	0.122098408931699	0.11539492050467
P36049	EBP2	YKL172W	-0.186409350229191	0.115471187576281
P36054	RCN1	YKL159C	-0.225038187974874	0.122653681694939
P34244	HSL1	YKL101W	-0.170995486620228	0.115743726035082
Q12396	EMP46	YLR080W	0.369956215836947	0.126495375208193
Q3E830	EGO2	YCR075W-A	-0.2197830277183	0.116074923997031
P38959	VPS41	YDR080W	0.346059633149785	0.116423442510451
P53829	CAF40	YNL288W	-0.315724295127382	0.116796784857973
P53959	COG6	YNL041C	0.178511425330768	0.117336918969192
P47015	AIM23	YJL131C	0.290340508304215	0.128129725838729
Q06651	PIB1	YDR313C	0.161105883572105	0.128235516282125
P08417	FUM1	YPL262W	0.105277232304289	0.117969995205913
P32479	HIR1	YBL008W	-0.318187709772953	0.118248210268909
P53044	UFD1	YGR048W	0.118352558328432	0.118391334729068
Q03654	CEF1	YMR213W	-0.134998956227157	0.122920755381372
P32377	MVD1	YNR043W	-0.12788914628187	0.118607762830993
Q12315	GLE1	YDL207W	-0.146308523013143	0.12310039967788
P40032	TPA1	YER049W	0.130165806350735	0.118968533915957
P32849	RAD5	YLR032W	-0.229839817756449	0.11898809913871
Q12091	DAP1	YPL170W	0.129213712330742	0.119006928023484
P42942		YGR210C	-0.142305903551527	0.11906733795671
Q06389	FRQ1	YDR373W	-0.308110903499717	0.12370983314251
P0CX46;P0CX45	NA	NA	-0.144778082214103	0.11977195507193
P32835	GSP1	YLR293C	0.152901771184972	0.119834721220652
P40959	MVP1	YMR004W	0.124036111829199	0.120070909887859
P34225	YEL1	YBL060W	0.558870483509935	0.130906582888593
P32832	NPL6	YMR091C	0.0984219764419159	0.120369694740167
P36008	TEF4	YKL081W	-0.0991526557414417	0.120480262774991
P53277	SYF2	YGR129W	-0.326503081704651	0.125088029296369
P53082	FRA2	YGL220W	-0.271878430297679	0.12146268637123
P38144	ISW1	YBR245C	0.107924351285487	0.121586607948481
P36421	TYS1	YGR185C	-0.116694374075081	0.1218493668337
P22214	SEC22	YLR268W	-0.189840113388509	0.121880737812605
P16639	ATE1	YGL017W	0.261602378477416	0.122041736490747
P32776	TFB1	YDR311W	0.155439078846701	0.122352845741835
P34072	MKS1	YNL076W	0.233631136944251	0.12240332418649
Q03771	ACL4	YDR161W	-0.318222467173069	0.122485620333144
P38788	SSZ1	YHR064C	-0.112408463655797	0.122666702424143
P39979	HPA3	YEL066W	0.202313724767752	0.122751789314593
P40958	MAD2	YJL030W	0.212348455485305	0.122878537488275
P35178	RRP1	YDR087C	-0.154326538159555	0.123111250262746
Q01476	UBP2	YOR124C	0.0974589287828529	0.12317670607921
P20436	RPB8	YOR224C	0.132838372191479	0.123273253646412
P53303	ZPR1	YGR211W	-0.112676110712719	0.123444890070713
P43601	ATG18	YFR021W	0.253730346551745	0.123626700972659
P37297	STT4	YLR305C	-0.180537711438522	0.123661417873512
P19736	PRP9	YDL030W	0.264739070113599	0.123725081536531
Q08952	OXR1	YPL196W	-0.211634457172707	0.123779193514857
Q04311	VMS1	YDR049W	0.147443765138032	0.123873400295112
Q07896	NOC3	YLR002C	0.113028722333365	0.123906259157366
Q06106	MRD1	YPR112C	-0.14656727627743	0.124508277503698
Q02873		YPL107W	-0.178159848101757	0.14481998191691
P09624	LPD1	YFL018C	-0.0950353374875519	0.124669427576516
Q04964	SML1	YML058W	-0.227242612738916	0.1250394791115
P46992		YJL171C	-0.212222124019988	0.125598427227711
P28789	HEM3	YDL205C	-0.150118835441003	0.125834332110867
P0C2H9	RPL31B	YLR406C	0.198656576771256	0.125870679389491
P53973	HDA1	YNL021W	-0.240590970450146	0.126076888284653
P38218	POA1	YBR022W	0.164674431558591	0.146374295141979
Q03266	ABZ2	YMR289W	0.186870101581281	0.130730974670854
P38302	NTC20	YBR188C	0.388170681909838	0.133743274363751
P35183	AST1	YBL069W	0.148429411322503	0.127006510430186
P12385	SUP45	YBR143C	-0.0981698907759281	0.127322983216155
P43557	FMP32	YFL046W	0.21018287860387	0.137951608471509
Q02961		YPL113C	-0.156569824348278	0.138107694352477
Q12072	IOC2	YLR095C	-0.216499158605618	0.127585961260166
P40094	COG3	YER157W	0.16773066305343	0.127612910973173
P48412	UPF3	YGR072W	0.240354929195348	0.127700320269208
P14693	SAM35	YHR083W	0.140495938487909	0.128338284969458
P36069	PMU1	YKL128C	0.202741697911534	0.128571961041524
P32485	HOG1	YLR113W	0.118151956926564	0.12872281673117
P38737	ECM29	YHL030W	0.101382545601677	0.128811110362462
P53298	OKP1	YGR179C	0.241343998840915	0.131360092449148
P14164	ABF1	YKL112W	-0.13891099969349	0.129387854788993
Q04728	ARG7	YMR062C	-0.125181535336687	0.129582016343466
Q07349	MRX9	YDL027C	-0.211962703763795	0.140189765990641
Q04080	GPI17	YDR434W	0.223822303257435	0.129944033532581
P32571	DOA4	YDR069C	0.257465226156555	0.137091051223159
P32774	TOA2	YKL058W	-0.198245275026405	0.130302628402725
P40070	LSM4	YER112W	0.156881526093763	0.130754214558048
P38623	RCK2	YLR248W	-0.124312586910328	0.130820203076578
P46676	SUM1	YDR310C	-0.108671765919073	0.132196459000483
Q03264	NGL2	YMR285C	0.115867893370531	0.13307960338776
Q12000	TMA46	YOR091W	-0.136758210023167	0.133431834133567
P32504	CBF2	YGR140W	0.32556589739502	0.133706877721297
Q00618	BET4	YJL031C	-0.237272701700583	0.133788522465843
P30665	MCM4	YPR019W	0.107994781322652	0.13383595991267
P38079	YRO2	YBR054W	0.503070734098834	0.16134382391593
Q12100	RTK1	YDL025C	0.205269937942973	0.135015888635394
P53253	NNF2	YGR089W	0.220651222123173	0.13517154057837
Q05788	PNP1	YLR209C	-0.129269733508458	0.135232117777032
P43567	AGX1	YFL030W	0.161657893440477	0.145927661981101
P38255	RXT2	YBR095C	-0.221017975411584	0.137755868425243
P05756	RPS13	YDR064W	-0.0833807854479787	0.136205017196256
P50874	ORC5	YNL261W	-0.311998179740623	0.136342845914105
P53337	ERV29	YGR284C	0.194322356608993	0.136611466670217
P22138	RPA135	YPR010C	-0.0966297888900947	0.136797032529763
P30771	NAM7	YMR080C	0.116088618921182	0.136825180043496
P53178	ALG13	YGL047W	0.245859474828059	0.136887449890316
Q07950	YEH2	YLR020C	-0.297016063138514	0.139648765406934
P38756	TCD1	YHR003C	0.150485437036927	0.137777301141306
Q12464	RVB2	YPL235W	-0.114752732620278	0.137839226854668
P53238	PEF1	YGR058W	0.184656756982552	0.138166260474842
P32875	LIP5	YOR196C	-0.10075090623037	0.138187429187483
Q02647	DYN2	YDR424C	0.196966362098642	0.138618775401325
P39683	NPT1	YOR209C	0.119137510441366	0.138767304067321
P11484	SSB1	YDL229W	-0.0826406115336198	0.139012742956266
P31384	CCR4	YAL021C	-0.0992158167346666	0.139202325992194
P28737	MSP1	YGR028W	-0.118089601807085	0.150000863289328
P38250	IST2	YBR086C	0.12330550472014	0.140185335567059
P40470	RRT14	YIL127C	-0.379235290610673	0.140336762085211
P33734	HIS7	YBR248C	-0.097083783498416	0.140460459238142
Q07895		YLR001C	-0.234684582386791	0.144912815711787
P00175	CYB2	YML054C	0.225493556095785	0.15122904356597
P33441	MFT1	YML062C	-0.148092775317451	0.140995659135564
P47096	BNA1	YJR025C	0.1330168140477	0.141026848240584
P41735	CAT5	YOR125C	-0.304322588243675	0.141383856798422
P39935	TIF4631	YGR162W	-0.123168145634232	0.141774976450318
P34761	WHI3	YNL197C	0.148627336807955	0.141961371941023
P25626	IMG1	YCR046C	-0.173131602273319	0.142200798284433
Q04545	TDA9	YML081W	-0.588163679682982	0.169676885590012
P47160	ENT3	YJR125C	0.127964100657671	0.143344993799321
P06780	RHO1	YPR165W	-0.174107499516708	0.143786229711016
P00817	IPP1	YBR011C	-0.099114670846447	0.144160930561578
P18409	MDM10	YAL010C	0.19035716669174	0.14636883172203
Q07451	YET3	YDL072C	0.333968508148661	0.144689919283557
P43591	YFH7	YFR007W	0.217915103886085	0.145829367495324
Q12746	PGA3	YML125C	-0.130137655764948	0.146294052642427
P11709	BIK1	YCL029C	-0.16759642363705	0.146667257191082
P25694	CDC48	YDL126C	0.0968791246084493	0.146714342343994
Q03124	RSC9	YML127W	0.15002871328883	0.146937122624131
P40529	AGE2	YIL044C	0.175419815213598	0.147004890164702
P40018	SMB1	YER029C	0.242690097352273	0.147163514759535
P35197	GCS1	YDL226C	-0.100916846559748	0.147298095017268
P49167	RPL38	YLR325C	-0.117672572995943	0.147470904281938
P22517	CMK2	YOL016C	0.179758381761491	0.14757267598148
P27515	URK1	YNR012W	0.326839479884033	0.149555683019936
P38137	PCS60	YBR222C	0.110807851398242	0.148140420721378
P18961	YPK2	YMR104C	0.344970537908349	0.152475326584931
Q04772	IRC21	YMR073C	-0.194440563404338	0.148432136383697
P38787	PAN5	YHR063C	-0.118526750243991	0.148643019697389
P0CX83;P0CX82	NA	NA	-0.141159029387524	0.14901298595032
Q04217	ECM16	YMR128W	-0.099254886245749	0.149153781917289
Q12165	ATP16	YDL004W	-0.131009630428871	0.149418647592684
P47064	APS3	YJL024C	-0.287802555560667	0.156734322690083
P46984	GON7	YJL184W	0.1080241956805	0.150107849985569
P40367	LAS21	YJL062W	-0.214206057856689	0.152347567279135
P31412	VMA5	YKL080W	-0.0986816524013676	0.150514647291336
P40540	EMC5	YIL027C	0.152382747358374	0.150520219788331
P33317	DUT1	YBR252W	-0.140896596304106	0.151010719401657
P40956	GTS1	YGL181W	-0.148931179409047	0.15112356708849
Q04372	TAP42	YMR028W	0.180435834194085	0.15121128293154
P36064	CMC1	YKL137W	-0.167872191744472	0.151396418182263
Q07824	TPO1	YLL028W	-0.273498478556284	0.153736294547566
P38206	RFT1	YBL020W	-0.400549227883943	0.188922309830218
Q02753	RPL21A	YBR191W	0.42983026234603	0.151938277287016
P24309	DBR1	YKL149C	0.295526162346228	0.156363333153599
P38630	RFC1	YOR217W	-0.157943939247012	0.153047192611677
P00812	CAR1	YPL111W	0.208906911601819	0.153203705977263
P34217	PIN4	YBL051C	-0.0922127026430957	0.153290454391197
P32643	TMT1	YER175C	0.157686527794773	0.15537142926763
P38903	RTS1	YOR014W	0.129033087824123	0.153853529617807
P38748	ETP1	YHL010C	-0.223479250696897	0.168800163910794
P42842	EMW1	YNL313C	-0.0993037601878797	0.154256873702296
P53552	THO2	YNL139C	-0.11124015730627	0.154435228333994
Q12198		YLL058W	-0.226072138864527	0.154628530982811
O43137		YBR085C-A	0.169003264761336	0.154698114468671
P06773	DCD1	YHR144C	-0.219102843307802	0.155204831945513
P25605	ILV6	YCL009C	-0.124978281086463	0.155442317319392
P38109		YBR139W	0.126940000522541	0.155785249010452
P22141	PRE1	YER012W	0.198429578151078	0.155813259790981
Q06252		YLR179C	-0.171871699068735	0.155856176175459
P11914	MAS2	YHR024C	-0.124220623163687	0.156099254843722
P38011	ASC1	YMR116C	-0.109336066603248	0.156409784541088
P06174	HEM4	YOR278W	0.178671528636016	0.15655432606477
P33336	SKN1	YGR143W	0.171300037557273	0.167017366870179
Q06679	UTP4	YDR324C	-0.122614831298673	0.156620889420978
P14832	CPR1	YDR155C	0.111236396665383	0.156690739444658
P32861	UGP1	YKL035W	0.0953168972023803	0.156732546972264
Q05863		YLR281C	-0.219596557338928	0.16720244044442
P38790	HTD2	YHR067W	0.228616574941704	0.193851067930871
P21957	OPI1	YHL020C	-0.156425581104447	0.156938213051329
P23639	PRE8	YML092C	-0.0821317341242036	0.157484860935181
P10961	HSF1	YGL073W	0.141686116850089	0.157581219242216
P05453	SUP35	YDR172W	-0.0858494019720624	0.157895786285291
P22579	SIN3	YOL004W	-0.0881253667545714	0.158206164761261
P53152	MMS2	YGL087C	0.166704159092333	0.158272391619095
P53274		YGR126W	-0.336955585335652	0.158500836763002
P39954	SAH1	YER043C	-0.115072061909586	0.158848338776881
P33891	TIP20	YGL145W	0.13145442366579	0.15896870900759
P09798	CDC16	YKL022C	-0.461927823130683	0.159564351180676
P14907	NSP1	YJL041W	-0.0988930108587418	0.159721180306143
P14742	GFA1	YKL104C	0.088753079529635	0.159880862508688
P11154	PYC1	YGL062W	0.152845872518974	0.160561566471592
P40046	VTC1	YER072W	0.273119313426456	0.161129338572004
P23394	PRP28	YDR243C	-0.381900260795266	0.168866005149863
P40048	PTP3	YER075C	0.1470051946126	0.161963801198248
Q05789	ATG38	YLR211C	-0.301464070210923	0.236427451374031
Q12221	PUF2	YPR042C	0.243906855054679	0.162435658778395
Q12114	CHS5	YLR330W	0.0849308651899534	0.162539163520787
P47047	MTR4	YJL050W	-0.0870510242464313	0.162572919137112
Q08235	BRX1	YOL077C	-0.138813032107652	0.16280678162871
P40971	LYS14	YDR034C	-0.235012857618194	0.167400164634097
P40091	PEA2	YER149C	-0.203493476949081	0.163173966863899
P25566	MXR2	YCL033C	-0.308850604348684	0.163278136623323
P35127	YUH1	YJR099W	0.160603484454068	0.163291306787065
Q96VH4	HBN1	YCL026C-B	-0.371776894723279	0.164112811902634
Q8TGJ3	KSH1	YNL024C-A	-0.805680311534154	0.174549700989904
Q06143	DIC1	YLR348C	-0.583599331938046	0.174560963216705
P51534	SHE4	YOR035C	0.192029211587716	0.164319982035651
P0CX44;P0CX43	NA	NA	-0.0937809179536586	0.164397527416325
P39743	RVS167	YDR388W	0.0981548827690624	0.164570499607853
P30605	ITR1	YDR497C	-0.2098398700528	0.166680554624721
Q04739	GAL83	YER027C	-0.139900383375515	0.164774785928495
Q02979	GDE1	YPL110C	0.235428683750058	0.165055557025067
Q07478	SUB2	YDL084W	-0.117133925004914	0.16570173903504
P21192	ACE2	YLR131C	0.265239524545027	0.166006659199406
P33203	PRP40	YKL012W	0.231509143944141	0.166078732531392
P38121	POL12	YBL035C	0.126322243798931	0.166440201193338
P36090	ANR2	YKL047W	-0.136965174385288	0.166709681071537
P50087	MIC26	YGR235C	-0.171937462195697	0.167333728445091
Q04472	MGR3	YMR115W	-0.147071521176443	0.167474824087398
P53196	RPN14	YGL004C	0.139867710693416	0.167806115382639
P22146	GAS1	YMR307W	-0.0910162480226973	0.167899524597697
P21182	SPE2	YOL052C	-0.113543910093465	0.168183259674191
P54964	REX2	YLR059C	-0.134913402311234	0.168265426471045
P07253	CBP6	YBR120C	-0.10823076431425	0.169251075417503
P40207	ERG29	YMR134W	0.209711512185738	0.169327710595161
P12709	PGI1	YBR196C	0.097511007086851	0.169436502930385
P35845	SWH1	YAR042W	0.107996894407393	0.169482177557987
P35723	YET1	YKL065C	0.243228967782603	0.169542980417818
P53894	CBK1	YNL161W	0.115007457183314	0.169744845347464
Q02772	PET191	YJR034W	-0.182817868186156	0.169979597526717
P40825	ALA1	YOR335C	0.0741099213401455	0.169982075448188
P32048	MSK1	YNL073W	0.193643865270172	0.177503209583877
Q07915	RLP24	YLR009W	-0.172329268909994	0.171103019491646
Q06406	LSM6	YDR378C	-0.198621097160061	0.171231957935661
P34909	MOT2	YER068W	-0.119300262314102	0.1716206911102
Q07505		YDL086W	0.138897468985981	0.172042978909511
P53549	RPT4	YOR259C	-0.0972480928350521	0.17246019564395
P32499	NUP2	YLR335W	0.0780751274599822	0.172509514052402
Q04279	SEG1	YMR086W	0.0862711503954827	0.173252574278658
P53954	ALG11	YNL048W	0.124680836374388	0.173266867149894
Q08601	MCA1	YOR197W	-0.116115011380803	0.173421286169303
P53169	YBP2	YGL060W	0.236186903225519	0.173445538098322
P53978	HEF3	YNL014W	-1.05395439133112	0.175484327507812
P23595	PPH22	YDL188C	-0.129676740501509	0.173572006713223
Q12518	ENT1	YDL161W	-0.155073658749323	0.173617334353255
Q08970	MMT2	YPL224C	0.234644678370344	0.193405175957065
P38084	BAP2	YBR068C	0.141236038219084	0.173643271111816
P40433	PFK26	YIL107C	-0.196021295683572	0.177982371471788
P43610	IRC5	YFR038W	0.149660927728696	0.173796440758025
P25576	POF1	YCL047C	0.12604028108078	0.173834645603756
P38216		YBR016W	0.22334700961656	0.173854288707811
P32893	TRS65	YGR166W	0.349424073995344	0.17637897072061
P50090	KEL2	YGR238C	0.19072328380269	0.194294599624562
P36124	SET3	YKR029C	-0.178462413237014	0.174685421956539
Q12523		YPL247C	0.150163113512882	0.175063979030404
P36006	MYO3	YKL129C	0.11835875519035	0.175091391129252
P40523		YIL055C	0.198350550037112	0.185450830621605
P25337	BUD31	YCR063W	-0.36356132641151	0.179712677879445
P43569	CAF16	YFL028C	0.19990178657217	0.175845811496461
P38770	BRL1	YHR036W	-0.154228611741392	0.175993677728052
P16387	PDA1	YER178W	0.0816579575718919	0.176113664235125
P32855	SEC8	YPR055W	0.136311784955641	0.176127990857883
P45818	ROK1	YGL171W	-0.148695237152754	0.176334765172463
P46674	SAC3	YDR159W	0.220964411444712	0.176574803215736
P53855	ATG2	YNL242W	0.310436630315799	0.176769799773226
P12945	NAT1	YDL040C	0.0741461287897565	0.176794719584795
P40328	YTA6	YPL074W	0.17140222855668	0.176980457070593
P21242	PRE10	YOR362C	-0.0814319924733091	0.177036023638918
P40037	HMF1	YER057C	0.117200784716381	0.177088785225193
P40994	ARF3	YOR094W	0.158151974547959	0.177281693010562
P38818	CTM1	YHR109W	0.238577259067505	0.187663942228733
P38803	IPI1	YHR085W	-0.214285334458012	0.177556257714898
P38348	HSM3	YBR272C	0.129322908099542	0.177669531946587
Q05942	RSA3	YLR221C	-0.160204191298121	0.177975311658338
Q03786		YDR248C	0.139959509250666	0.17798072065545
Q06137		YLR345W	0.184268222026308	0.182357702325182
Q3E772	LSO2	YGR169C-A	-0.138398255543475	0.178727474548272
P04385	GAL1	YBR020W	-0.704584795133343	0.183169926757314
P19880	YAP1	YML007W	-0.187693013409426	0.179474139700348
Q03795		YMR155W	0.339235425416472	0.194172598173047
P38274	HSL7	YBR133C	0.406478139645856	0.187483894345587
P32342	SRP21	YKL122C	0.105148264262649	0.180715526109453
P32914	SPT4	YGR063C	0.24640267693184	0.180744502737278
P47079	CCT8	YJL008C	-0.0820418331909778	0.181082665806001
P25386	USO1	YDL058W	0.117364973274189	0.18228812560268
Q07528	ATG20	YDL113C	0.200768426718522	0.182406687138478
P38996	NAB3	YPL190C	0.0988130906470559	0.18259158516638
Q12405	LPX1	YOR084W	0.176900529408346	0.193024996541064
Q04264	PDS5	YMR076C	0.0899046924611966	0.182833852311972
Q07834		YLL032C	0.227459730594106	0.184850392062619
P02381	VAR1	Q0140	-0.127383858667951	0.183119105582288
Q08645	MET7	YOR241W	-0.118168450149874	0.183792173705998
P46989	ATG27	YJL178C	0.103369892054893	0.184095599847887
Q03233	ADD37	YMR184W	-0.205151805776705	0.184363518464484
P32896	PDC2	YDR081C	0.154702318761803	0.184391401948322
P14020	DPM1	YPR183W	0.111338404800826	0.184893260458939
P07884	MOD5	YOR274W	-0.183784498890358	0.184983458340744
Q12417	PRP46	YPL151C	0.133789676850334	0.185019767927285
Q03677	ADI1	YMR009W	-0.144446690880265	0.185366277776685
P47102	GEA1	YJR031C	0.164340957927092	0.185473404869374
P53081	NIF3	YGL221C	-0.0813475754364532	0.18565883011715
P53685	HST1	YOL068C	-0.191886543717001	0.187974328288777
P39732	GIP4	YAL031C	0.264728683791631	0.188227721541558
P38998	LYS1	YIR034C	0.132026094993755	0.186526664380078
P06105	SCP160	YJL080C	-0.0745456467382333	0.186591224076252
Q02159	UBC7	YMR022W	-0.112755909224063	0.186666174604478
P20049	TYR1	YBR166C	0.104729920230461	0.18677648467631
P38749	YAP3	YHL009C	-0.115625792975791	0.186866871665651
P41805	RPL10	YLR075W	-0.113588727266063	0.187864812335115
P32432	SFP1	YLR403W	-0.179708981818326	0.187926822892073
Q99260	YPT6	YLR262C	0.112227945056926	0.188167679666269
P25378	RHB1	YCR027C	0.32797819769382	0.188391687856162
P02309	HHF2	YNL030W	-0.121286917236255	0.188875661668279
P02309	HHF1	YBR009C	-0.121286917236255	0.188875661668279
P07250	ARG82	YDR173C	0.215778233857115	0.196212618251508
P38113	ADH5	YBR145W	-0.509996468842687	0.189913969429271
P27697	COQ8	YGL119W	-0.281233548556386	0.1903047486989
P53721	RCF2	YNR018W	0.164313373456508	0.190833369586969
P32568	SNQ2	YDR011W	0.102092665375974	0.191007799344125
P40157	VID27	YNL212W	0.0970761218976612	0.191067215757998
Q12743	DFM1	YDR411C	-0.251570327121936	0.191524699956312
P16664	RGP1	YDR137W	0.0977364876444859	0.191741825899372
Q00539	NAM8	YHR086W	0.223503532381432	0.19182619995772
Q08649	ESA1	YOR244W	-0.209146452298398	0.193969692558104
Q04410	GRH1	YDR517W	-0.153061173199301	0.192082279616151
P21825	SEC62	YPL094C	-0.130863524419453	0.192495865752427
P32891	DLD1	YDL174C	0.105221268658831	0.193374439297112
P09440	MIS1	YBR084W	-0.0846706723650001	0.193445972994643
P53724	MRPL50	YNR022C	-0.139209684594512	0.194028963150699
P32608	RTG2	YGL252C	0.0741308396622742	0.194150290176851
P25338	MPO1	YGL010W	0.268670587797679	0.198342976947868
P53844	PDR17	YNL264C	0.114752363951585	0.194216793139547
P19956	MRPL44	YMR225C	-0.363496287957659	0.199410404772716
P46672	ARC1	YGL105W	-0.088145929905501	0.195539342835055
O14467	MBF1	YOR298C-A	0.0984720746854109	0.195733802281984
Q04632	COG8	YML071C	0.118761642093585	0.19653421318375
P53183		YGL039W	-0.195453727925639	0.196535085805925
P33753	TRM2	YKR056W	-0.139269105612065	0.196559040230506
P53971	FAP1	YNL023C	-0.168661115014299	0.196717458444399
P38635	HIS2	YFR025C	0.123404984141462	0.196876525837498
Q07799	LMO1	YLL007C	-0.278902965847472	0.211105261114883
P47170	IML1	YJR138W	-0.248949973374646	0.1979609163892
P40504	KTR7	YIL085C	0.446497699050866	0.199936476193323
P43619	BNA6	YFR047C	0.0883583311190677	0.198583557821209
P40485	SLM1	YIL105C	-0.110020776818747	0.198616295796588
P36060	MCR1	YKL150W	0.0917277081390537	0.199348264260463
P03874	CBP2	YHL038C	0.254493273656138	0.199565338159162
P16474	KAR2	YJL034W	-0.0791028122877044	0.199621280820755
P40990	MSS2	YDL107W	-0.322017258226772	0.225717947876681
Q04847	ROY1	YMR258C	0.195697372960215	0.199722747927134
Q05506		YDR341C	-0.0750736922998989	0.199984092157226
P37292	SHM1	YBR263W	0.0964595330172457	0.200011077611767
P21269	CCA1	YER168C	0.0919805155413229	0.200043160645907
P38813	BIG1	YHR101C	0.313013735401938	0.214801383536896
P09547	SWI1	YPL016W	-0.191565356366077	0.201017148299234
P34250	SEG2	YKL105C	-0.168945461272635	0.201993196296516
P53218	POP6	YGR030C	0.17993558573578	0.202199925545346
Q06629	HDA2	YDR295C	0.153178544008334	0.202265057971744
P39965	AIM10	YER087W	-0.180090496231355	0.20235381688575
P53191	PIB2	YGL023C	-0.132572763610028	0.202355794739158
P25808	SPB4	YFL002C	-0.137939258590873	0.202624616349584
P40581	HYR1	YIR037W	0.110030752279396	0.203439935840856
Q02950	MRP51	YPL118W	-0.283152080951993	0.203540208986423
P21538	REB1	YBR049C	-0.0962386286555592	0.203565310288213
Q05359	ERP1	YAR002C-A	0.160716891555015	0.203771143702172
P32798	COT1	YOR316C	-0.192620150698996	0.203929915536232
P40302	PRE5	YMR314W	-0.115863201200487	0.203942622091545
P47155	ILM1	YJR118C	-0.133202271800837	0.204004310731329
P32500	NDC1	YML031W	-0.174491734898258	0.204015581861399
P53272		YGR122W	-0.200420247797659	0.206093668316602
P39007	STT3	YGL022W	0.133694716226607	0.204224704729266
P32486	KRE6	YPR159W	-0.107951258090377	0.204477342224219
P38248	ECM33	YBR078W	0.158738976622999	0.20452634899177
P41812	POP1	YNL221C	0.144787542129968	0.204702173510427
P23248	RPS1B	YML063W	-0.0877150989895839	0.204757183030732
Q12502	LDB19	YOR322C	-0.148033902142849	0.205284501426853
P10962	MAK16	YAL025C	-0.122929349321193	0.205842549190337
P53738	TRM112	YNR046W	-0.132856254382137	0.206601887294675
Q07872	ENT4	YLL038C	0.179984012902828	0.210987638908218
P38089	PTC4	YBR125C	-0.247034191309492	0.20904803995396
P05744	RPL33A	YPL143W	-0.103731436219661	0.207170809475517
P36148	GPT2	YKR067W	0.155775561805182	0.207272587906981
P38138	ROT2	YBR229C	0.0979053001512611	0.207560607945018
P50109	PSP2	YML017W	-0.134157883057938	0.207773731590212
P34078	LTV1	YKL143W	-0.139296239615653	0.208271256273011
P05317	RPP0	YLR340W	0.083431995782135	0.20900818897653
P34756	FAB1	YFR019W	-0.158192169050071	0.211282494507607
P08536	MET3	YJR010W	-0.412229886996283	0.213504704652035
P47019	ALB1	YJL122W	-0.1955770166186	0.209626322062866
P40858	MRPL49	YJL096W	0.227230503892361	0.209773243944229
Q08446	SGT1	YOR057W	0.0709074894103594	0.210070545639292
Q00772	SLT2	YHR030C	0.172750697335157	0.21008767098728
Q04934	IVY1	YDR229W	0.247860487285219	0.210446564866783
P40357	SEC9	YGR009C	-0.0782402778271027	0.211217786442544
P25604	STP22	YCL008C	-0.199414429872387	0.213118106233791
P08964	MYO1	YHR023W	0.112663026041432	0.211547802627219
Q06108	RGC1	YPR115W	-0.187688541973664	0.211581555410475
P40495	LYS12	YIL094C	-0.0991931403530479	0.211626172433967
P22336	RFA1	YAR007C	-0.110658286799655	0.211672465310667
Q02931	NAN1	YPL126W	-0.0921509925966291	0.211775610638091
P15367	SEC11	YIR022W	-0.2673692137096	0.212042608044825
P25333	SAT4	YCR008W	-0.335034770805333	0.226732563536605
Q04213	IOC4	YMR044W	-0.360983468651018	0.217258271988686
Q06132	SGD1	YLR336C	0.314495094475358	0.217555568406983
P32505	NAB2	YGL122C	-0.105173492513131	0.21369052016305
Q12496	SDD3	YOL098C	0.0922316206993763	0.214226849147261
P53320	MTM1	YGR257C	-0.433403715023736	0.239866645555938
Q12486		YOR131C	-0.147756143478194	0.214678190911319
P06786	TOP2	YNL088W	0.0765576835368549	0.214960550662265
P47120	LIA1	YJR070C	0.0769033301968598	0.215140104317184
P32842	VMA11	YPL234C	0.395123095080418	0.216252030477519
P40986	CDC1	YDR182W	0.145199818343034	0.21642088609416
Q04693	RSE1	YML049C	0.155608971975781	0.216524738991557
P34221	PTC3	YBL056W	-0.132360909539724	0.216803884029573
P40531	GVP36	YIL041W	0.0710663417873363	0.216985932565385
Q05949	BUR2	YLR226W	-0.186763293556758	0.22110959193939
Q08932	RSA1	YPL193W	-0.137510191748071	0.217081188026511
P32610	VMA8	YEL051W	-0.0814614743395659	0.217230516248883
Q6Q547	NOP10	YHR072W-A	0.197628863471984	0.217534918484973
Q05924	DCR2	YLR361C	-0.192267251340301	0.218231667322066
P38920	MLH1	YMR167W	0.242104425236974	0.22243951196719
P53330	RTT102	YGR275W	-0.149809293478935	0.218632396904909
P26725	YUR1	YJL139C	0.228524467091766	0.244096314885634
P40510	SER33	YIL074C	-0.0709884088709281	0.218890167401593
P19516	COX11	YPL132W	0.155762590731218	0.228781193131505
P04802	DPS1	YLL018C	0.0759846082468698	0.219294370019365
P39011	BEM4	YPL161C	-0.1771164417232	0.229704469728528
P25567	SRO9	YCL037C	0.141046766118116	0.219991544619749
Q03707	SRC1	YML034W	-0.0949957352033692	0.220053117970675
P06704	CDC31	YOR257W	-0.103942576258053	0.22012482749559
P20424	SRP54	YPR088C	-0.0875851861064945	0.220259824135936
[truncated: 1,683 more rows]
