# Supplementary material for: The metabolite-controlled ubiquitin conjugase Ubc8 promotes mitochondrial protein import
Source: Life Sci Alliance. 2022 Oct 17;6(1):e202201526. doi: 10.26508/lsa.202201526 (PMC9579816; doi:10.26508/lsa.202201526)
Supplement: Supplementary file 18 [file LSA-2022-01526_TableS5.xlsx]

## Sheet: Yeast strains used in the study
Yeast strain	Source	Identifier
BY4742 WT: MATα his3D1 leu2D0 lys2D0 ura3D0	Euroscarf, Y10000	HHY0392
BY4742 Dubc8: UBC8::kanMX4	Euroscarf, Y16577	134 E 11
BY4742 Dgid4: GID4::kanMX4	Euroscarf, Y13244	145 G 11
BY4742 Dgid10: GID10::natNT2	This study	SR64
BY4742 Dubx2: UBX2::natNT2	Euroscarf, Y10560	103 D 4
YPH499 WT: Mata ura3-52 lys2-80 ade2-101 trp1-D63 his3-D200 leu2-D1	Sikorski and Hieter, 1989	HHY495
YPH499 Darg4: ARG4::kanMX4	Woellhaf et al, 2016	HHY1129
YPH499 Dubc8: UBC8::kanMX4	This study	SR48
YPH499 Darg4 Dubc8: ARG4::kanMX4 UBC8::HisMX6	This study	SR46
YPH499 FBP1-6HA-NatNT2	This study	SR55
YPH499 MDH2-6HA-NatNT2	This study	SR58
YPH499 ICL1-6HA-NatNT2	This study	SR56
YPH499 Dubc8 FBP1-6HA-NatNT2	This study	SR6
YPH499 Dubc8 MDH2-6HA-NatNT2	This study	SR9
YPH499 Dubc8 ICL1-6HA-NatNT2	This study	SR7
CEN.PK113-1A WT	Kind gift from P. Kötter, Frankfurt	BMY073
CEN.PK113-1A Dubc8	This study	SR110
