# Supplementary material for: The metabolite-controlled ubiquitin conjugase Ubc8 promotes mitochondrial protein import
Source: Life Sci Alliance. 2022 Oct 17;6(1):e202201526. doi: 10.26508/lsa.202201526 (PMC9579816; doi:10.26508/lsa.202201526)
Supplement: Supplementary file 19 [file LSA-2022-01526_TableS6.xlsx]

## Sheet: Antibodies used in this study
Type	Name	Host	Dilution	Source
Primary antibody	Anti-DHFR	Rabbit	1:1000	van der Laan lab
Primary antibody	Anti-Sod1	Rabbit	1:500	Herrmann lab
Primary antibody	Anti-Mdj1	Rabbit	1:125	Becker lab
Primary antibody	Anti-Rip1	Rabbit	1:750	Becker lab
Primary antibody	Anti-Por1	Rabbit	1:250	Klaus Pfanner
Primary antibody	Anti-Act1	Rabbit	1:500	Herrmann lab
Primary antibody	Anti-Sam50	Rabbit	1:50	Becker lab
Primary antibody	Anti-Mdm10	Rabbit	1:250	Becker lab
Primary antibody	Anti-Mmm1	Rabbit	1:500	Becker lab
Primary antibody	Anti-Tom22	Rabbit	1:1000	Meisinger lab
Primary antibody	Anti-Tom40	Rabbit	1:1000	Becker lab
Primary antibody	Anti-Tom70	Rabbit	1:1000	Becker lab
Primary antibody	Anti-Cox4	Rabbit	1:1000	Becker lab
Primary antibody	Anti-Atp3	Rabbit	1:250	Becker lab
Primary antibody	AntiCox1	Rabbit	1:1000	Becker lab
